# Supplementary material for: LncmiRSRN: identification and analysis of long non-coding RNA related miRNA sponge regulatory network in human cancer
Source: Oxford University Press journal article supplement (doi:10.1093/bioinformatics/bty525), 2018-06-27
Supplement: bioinformatics_34_24_4232_s2.xlsx [file bioinformatics_34_24_4232_s2.xlsx]

## Sheet: GBM
Sponge lncRNAs	mRNAs	Shared miRNAs
ZNF518A	ERBB4	hsa-miR-19a-3p, hsa-miR-302b-3p, hsa-miR-302d-3p
ZNF518A	SMAD3	hsa-miR-140-5p, hsa-miR-142-5p, hsa-miR-155-5p, hsa-miR-18a-5p, hsa-miR-200a-3p
ZNF518A	PSAP	hsa-miR-19a-3p, hsa-miR-27a-3p, hsa-miR-27b-3p
ZNF518A	PELI1	hsa-miR-155-5p, hsa-miR-18a-5p, hsa-miR-19a-3p, hsa-miR-19b-3p
ZNF518A	ZEB2	hsa-miR-141-3p, hsa-miR-153-3p, hsa-miR-200a-3p, hsa-miR-200b-3p, hsa-miR-200c-3p, hsa-miR-429
ZNF518A	YOD1	hsa-miR-155-5p, hsa-miR-18a-5p, hsa-miR-19a-3p, hsa-miR-19b-3p
ZNF518A	XIAP	hsa-miR-130a-3p, hsa-miR-186-5p, hsa-miR-200b-3p, hsa-miR-200c-3p, hsa-miR-33b-5p, hsa-miR-429
ZNF518A	WDR37	hsa-miR-141-3p, hsa-miR-200a-3p, hsa-miR-200b-3p, hsa-miR-200c-3p, hsa-miR-429
ZNF518A	VAC14	hsa-miR-141-3p, hsa-miR-200a-3p, hsa-miR-200b-3p, hsa-miR-200c-3p, hsa-miR-429
ZNF518A	TP53INP1	hsa-miR-125b-5p, hsa-miR-130b-3p, hsa-miR-142-5p, hsa-miR-155-5p, hsa-miR-19a-3p
ZNF518A	TCF7L1	hsa-miR-141-3p, hsa-miR-200a-3p, hsa-miR-200b-3p, hsa-miR-200c-3p, hsa-miR-429
ZNF518A	SUZ12	hsa-miR-19a-3p, hsa-miR-200b-3p, hsa-miR-200c-3p
ZNF518A	STAT3	hsa-let-7a-5p, hsa-let-7c-5p, hsa-miR-125a-5p, hsa-miR-125b-5p, hsa-miR-130b-3p, hsa-miR-29b-3p
ZNF518A	SP1	hsa-miR-129-5p, hsa-miR-137, hsa-miR-200b-3p, hsa-miR-200c-3p, hsa-miR-27a-3p, hsa-miR-29b-3p, hsa-miR-33a-5p, hsa-miR-429
ZNF518A	SMAD2	hsa-let-7g-5p, hsa-miR-125a-5p, hsa-miR-155-5p, hsa-miR-18a-5p, hsa-miR-18b-5p, hsa-miR-200a-3p, hsa-miR-200b-3p, hsa-miR-27a-3p, hsa-miR-27b-3p
ZNF518A	PTPRD	hsa-miR-141-3p, hsa-miR-200a-3p, hsa-miR-200b-3p, hsa-miR-200c-3p, hsa-miR-429
ZNF518A	PPARA	hsa-miR-130a-3p, hsa-miR-130b-3p, hsa-miR-141-3p, hsa-miR-33a-5p
ZNF518A	PHLPP1	hsa-miR-141-3p, hsa-miR-18a-5p, hsa-miR-19a-3p, hsa-miR-200b-3p
ZNF518A	NFE2L2	hsa-miR-142-5p, hsa-miR-153-3p, hsa-miR-27a-3p
ZNF518A	NCOA3	hsa-miR-137, hsa-miR-18a-5p, hsa-miR-19b-3p, hsa-miR-29b-3p, hsa-miR-33a-5p, hsa-miR-98-5p
ZNF518A	NCAM1	hsa-miR-122-5p, hsa-miR-200c-3p, hsa-miR-30a-5p
ZNF518A	MEF2D	hsa-miR-122-5p, hsa-miR-18a-5p, hsa-miR-19a-3p
ZNF518A	MECP2	hsa-miR-122-5p, hsa-miR-130a-3p, hsa-miR-155-5p, hsa-miR-19a-3p
ZNF518A	MBNL2	hsa-miR-302d-3p, hsa-miR-30a-5p, hsa-miR-30b-5p, hsa-miR-30e-5p
ZNF518A	MBNL1	hsa-miR-30a-5p, hsa-miR-30b-5p, hsa-miR-30e-5p
ZNF518A	MAP4K4	hsa-let-7a-5p, hsa-miR-141-3p, hsa-miR-30d-5p
ZNF518A	LIN28A	hsa-let-7a-5p, hsa-let-7b-5p, hsa-let-7e-5p, hsa-miR-125a-5p, hsa-miR-125b-5p
ZNF518A	KRAS	hsa-let-7a-5p, hsa-let-7f-5p, hsa-let-7g-5p, hsa-miR-134-5p, hsa-miR-155-5p, hsa-miR-200c-3p, hsa-miR-27a-3p, hsa-miR-452-5p
ZNF518A	KLHL20	hsa-miR-141-3p, hsa-miR-200a-3p, hsa-miR-200b-3p, hsa-miR-200c-3p, hsa-miR-429
ZNF518A	KLF13	hsa-miR-125a-5p, hsa-miR-125b-5p, hsa-miR-302d-3p
ZNF518A	HIF1A	hsa-miR-142-5p, hsa-miR-155-5p, hsa-miR-186-5p, hsa-miR-18a-5p, hsa-miR-18b-5p, hsa-miR-27a-3p, hsa-miR-33a-5p, hsa-miR-429
ZNF518A	HDAC4	hsa-miR-125a-5p, hsa-miR-140-5p, hsa-miR-29b-3p, hsa-miR-302b-3p, hsa-miR-30c-5p, hsa-miR-381-3p
ZNF518A	ERBB2IP	hsa-miR-141-3p, hsa-miR-200a-3p, hsa-miR-200b-3p, hsa-miR-200c-3p, hsa-miR-429
ZNF518A	ELMO2	hsa-miR-141-3p, hsa-miR-200a-3p, hsa-miR-200b-3p, hsa-miR-200c-3p, hsa-miR-429
ZNF518A	DNMT3A	hsa-miR-194-5p, hsa-miR-200b-3p, hsa-miR-200c-3p, hsa-miR-29b-3p
ZNF518A	DICER1	hsa-let-7a-5p, hsa-let-7c-5p, hsa-let-7d-5p, hsa-miR-130a-3p, hsa-miR-130b-3p, hsa-miR-18a-5p, hsa-miR-200c-3p, hsa-miR-374a-5p
ZNF518A	CRKL	hsa-miR-200b-3p, hsa-miR-200c-3p, hsa-miR-429
ZNF518A	CREB1	hsa-miR-1224-5p, hsa-miR-122-5p, hsa-miR-200b-3p, hsa-miR-27a-3p, hsa-miR-27b-3p, hsa-miR-33b-5p
ZNF518A	CLIP1	hsa-miR-155-5p, hsa-miR-18a-5p, hsa-miR-19a-3p, hsa-miR-19b-3p
ZNF518A	CCND2	hsa-let-7a-5p, hsa-let-7b-5p, hsa-miR-155-5p, hsa-miR-29b-3p, hsa-miR-302b-3p, hsa-miR-302d-3p, hsa-miR-30c-5p, hsa-miR-98-5p
ZNF518A	BCL9	hsa-miR-30a-5p, hsa-miR-30b-5p, hsa-miR-30c-5p, hsa-miR-30d-5p
ZNF518A	ATXN1	hsa-miR-130a-3p, hsa-miR-19a-3p, hsa-miR-19b-3p
ZNF518A	APC	hsa-miR-125b-5p, hsa-miR-129-5p, hsa-miR-155-5p, hsa-miR-27a-3p
ZNF518A	ADAM10	hsa-miR-122-5p, hsa-miR-448, hsa-miR-655-3p
ZNF518A	ACVR2B	hsa-miR-141-3p, hsa-miR-194-5p, hsa-miR-200c-3p
ZNF518A	ABCA1	hsa-miR-19a-3p, hsa-miR-19b-3p, hsa-miR-27a-3p, hsa-miR-27b-3p, hsa-miR-33a-5p, hsa-miR-33b-5p
ZNF213-AS1	RPS6KB1	hsa-miR-16-5p, hsa-miR-195-5p, hsa-miR-497-5p
ZNF213-AS1	RECK	hsa-miR-15a-5p, hsa-miR-15b-5p, hsa-miR-16-5p
ZNF213-AS1	RAF1	hsa-miR-16-5p, hsa-miR-195-5p, hsa-miR-497-5p
ZFAS1	HDAC1	hsa-miR-34a-5p, hsa-miR-449a, hsa-miR-449b-5p, hsa-miR-520h
ZFAS1	MAPK8	hsa-miR-199a-3p, hsa-miR-214-3p, hsa-miR-26a-5p
ZFAS1	YWHAZ	hsa-miR-193b-3p, hsa-miR-22-5p, hsa-miR-320a, hsa-miR-375
ZFAS1	WNT1	hsa-let-7e-5p, hsa-miR-148a-3p, hsa-miR-148b-3p, hsa-miR-152-3p, hsa-miR-22-3p, hsa-miR-34a-5p
ZFAS1	TCL1A	hsa-miR-181a-5p, hsa-miR-181b-5p, hsa-miR-29b-3p
ZFAS1	POMC	hsa-miR-148a-3p, hsa-miR-22-3p, hsa-miR-488-3p, hsa-miR-488-5p
ZFAS1	IGF2BP1	hsa-miR-193a-5p, hsa-miR-196b-5p, hsa-miR-491-5p, hsa-miR-625-5p, hsa-miR-9-5p
ZFAS1	CDX2	hsa-miR-106a-5p, hsa-miR-181a-5p, hsa-miR-181b-5p, hsa-miR-181c-5p, hsa-miR-424-5p, hsa-miR-9-5p
ZFAS1	BIRC5	hsa-miR-16-5p, hsa-miR-195-5p, hsa-miR-214-3p, hsa-miR-34a-5p, hsa-miR-497-5p, hsa-miR-708-5p
ZFAS1	ARL2	hsa-miR-16-5p, hsa-miR-195-5p, hsa-miR-214-3p
ZEB1-AS1	PAX6	hsa-miR-140-5p, hsa-miR-488-3p, hsa-miR-7-5p
ZEB1-AS1	HMGB1	hsa-miR-153-3p, hsa-miR-205-5p, hsa-miR-218-5p
ZEB1-AS1	CDKN1B	hsa-miR-192-5p, hsa-miR-200b-3p, hsa-miR-218-5p, hsa-miR-221-3p
ZEB1-AS1	PIN1	hsa-miR-140-5p, hsa-miR-200b-3p, hsa-miR-200c-3p
ZEB1-AS1	FOXO3	hsa-miR-217, hsa-miR-221-3p, hsa-miR-29a-3p
ZEB1-AS1	AKT2	hsa-miR-29a-3p, hsa-miR-29b-3p, hsa-miR-29c-3p
ZBED5-AS1	CDK4	hsa-miR-124-3p, hsa-miR-195-5p, hsa-miR-497-5p
ZBED5-AS1	BMI1	hsa-miR-15a-5p, hsa-miR-16-5p, hsa-miR-495-3p
ZBED3-AS1	EGFR	hsa-miR-125a-5p, hsa-miR-125b-5p, hsa-miR-132-3p, hsa-miR-137, hsa-miR-21-5p, hsa-miR-491-5p
ZBED3-AS1	YOD1	hsa-miR-155-5p, hsa-miR-19a-3p, hsa-miR-21-5p
ZBED3-AS1	PIK3R1	hsa-miR-155-5p, hsa-miR-21-5p, hsa-miR-221-3p, hsa-miR-29a-3p, hsa-miR-29b-3p
ZBED3-AS1	NFIA	hsa-miR-21-5p, hsa-miR-29a-3p, hsa-miR-382-5p
ZBED3-AS1	LRP6	hsa-miR-21-5p, hsa-miR-29b-3p, hsa-miR-29c-3p
YTHDF3	TP53	hsa-miR-125a-5p, hsa-miR-125b-5p, hsa-miR-150-5p, hsa-miR-17-5p, hsa-miR-214-5p, hsa-miR-24-3p, hsa-miR-30a-5p, hsa-miR-30d-5p, hsa-miR-30e-5p
YTHDF3	HSPA5	hsa-miR-30a-5p, hsa-miR-30d-5p, hsa-miR-495-3p
YTHDF3	BACH1	hsa-miR-106b-5p, hsa-miR-17-5p, hsa-miR-20a-5p, hsa-miR-93-5p
YTHDF3	PELI1	hsa-miR-106b-5p, hsa-miR-17-5p, hsa-miR-20a-5p, hsa-miR-93-5p
YTHDF3	NRAS	hsa-let-7a-5p, hsa-let-7b-5p, hsa-let-7c-5p, hsa-miR-20a-5p
YTHDF3	MYC	hsa-let-7a-5p, hsa-let-7c-5p, hsa-let-7g-5p, hsa-miR-135a-5p, hsa-miR-135b-5p, hsa-miR-17-5p, hsa-miR-20a-5p, hsa-miR-24-3p, hsa-miR-373-3p
YTHDF3	E2F2	hsa-let-7a-5p, hsa-let-7b-5p, hsa-miR-125b-5p, hsa-miR-214-5p, hsa-miR-24-3p
YTHDF3	CCNA2	hsa-let-7b-5p, hsa-miR-22-3p, hsa-miR-24-3p
YTHDF3	YOD1	hsa-miR-106b-5p, hsa-miR-17-5p, hsa-miR-20a-5p, hsa-miR-93-5p
YTHDF3	TP53INP1	hsa-miR-125b-5p, hsa-miR-17-5p, hsa-miR-182-5p, hsa-miR-20a-5p, hsa-miR-93-5p, hsa-miR-96-5p
YTHDF3	SMAD7	hsa-miR-106b-5p, hsa-miR-20a-5p, hsa-miR-519d-3p, hsa-miR-93-5p
YTHDF3	SMAD5	hsa-miR-135a-5p, hsa-miR-135b-5p, hsa-miR-23a-3p
YTHDF3	RECK	hsa-miR-135b-5p, hsa-miR-182-5p, hsa-miR-373-3p, hsa-miR-96-5p
YTHDF3	RBL2	hsa-miR-106a-5p, hsa-miR-106b-5p, hsa-miR-17-5p, hsa-miR-20a-5p
YTHDF3	RBL1	hsa-miR-106b-5p, hsa-miR-17-5p, hsa-miR-20a-5p
YTHDF3	PRDM1	hsa-let-7a-5p, hsa-let-7b-5p, hsa-miR-125b-5p, hsa-miR-30a-5p, hsa-miR-9-5p
YTHDF3	PHLPP2	hsa-miR-135a-5p, hsa-miR-20a-5p, hsa-miR-372-3p, hsa-miR-93-5p
YTHDF3	MTSS1	hsa-miR-135a-5p, hsa-miR-182-5p, hsa-miR-96-5p
YTHDF3	MTOR	hsa-let-7c-5p, hsa-miR-125a-5p, hsa-miR-196b-5p, hsa-miR-373-3p, hsa-miR-520c-3p
YTHDF3	MCL1	hsa-miR-106a-5p, hsa-miR-125a-5p, hsa-miR-125b-5p, hsa-miR-153-3p, hsa-miR-20a-5p, hsa-miR-302b-3p, hsa-miR-582-5p
YTHDF3	MAP4K4	hsa-let-7a-5p, hsa-miR-30d-5p, hsa-miR-520e
YTHDF3	MAP3K1	hsa-miR-23b-3p, hsa-miR-302a-3p, hsa-miR-302b-3p, hsa-miR-302d-3p
YTHDF3	KLF13	hsa-miR-125a-5p, hsa-miR-125b-5p, hsa-miR-302d-3p, hsa-miR-372-3p
YTHDF3	JAK1	hsa-miR-106b-5p, hsa-miR-17-5p, hsa-miR-373-3p
YTHDF3	HIF1A	hsa-miR-106a-5p, hsa-miR-106b-5p, hsa-miR-17-5p, hsa-miR-20a-5p, hsa-miR-20b-5p, hsa-miR-22-3p, hsa-miR-23b-3p
YTHDF3	HDAC4	hsa-miR-125a-5p, hsa-miR-22-3p, hsa-miR-302b-3p, hsa-miR-9-5p
YTHDF3	E2F3	hsa-miR-106b-5p, hsa-miR-125a-5p, hsa-miR-125b-5p, hsa-miR-17-5p, hsa-miR-20a-5p, hsa-miR-874-3p
YTHDF3	BTG1	hsa-miR-22-3p, hsa-miR-372-3p, hsa-miR-373-3p
YTHDF3	BMPR2	hsa-miR-135a-5p, hsa-miR-135b-5p, hsa-miR-153-3p, hsa-miR-17-5p, hsa-miR-20a-5p
YTHDF3	BCL2L11	hsa-miR-106b-5p, hsa-miR-17-5p, hsa-miR-20a-5p, hsa-miR-24-3p, hsa-miR-9-5p
WDFY3-AS2	PPARA	hsa-miR-22-3p, hsa-miR-9-3p, hsa-miR-9-5p
WAC-AS1	CHUK	hsa-miR-15a-5p, hsa-miR-15b-5p, hsa-miR-16-5p, hsa-miR-195-5p, hsa-miR-23a-3p, hsa-miR-23b-3p
WAC-AS1	MAPK9	hsa-miR-106a-5p, hsa-miR-106b-5p, hsa-miR-17-5p, hsa-miR-20a-5p, hsa-miR-20b-5p, hsa-miR-93-5p
WAC-AS1	PFKP	hsa-miR-520a-3p, hsa-miR-520b, hsa-miR-520e
WAC-AS1	PSAP	hsa-miR-24-3p, hsa-miR-27a-3p, hsa-miR-27b-3p
WAC-AS1	PELI1	hsa-miR-106b-5p, hsa-miR-17-3p, hsa-miR-17-5p, hsa-miR-20a-5p, hsa-miR-93-5p
WAC-AS1	BMI1	hsa-miR-139-5p, hsa-miR-15a-5p, hsa-miR-16-5p, hsa-miR-192-5p, hsa-miR-218-5p, hsa-miR-302a-3p, hsa-miR-302b-3p
WAC-AS1	BACE1	hsa-miR-107, hsa-miR-15a-5p, hsa-miR-16-5p, hsa-miR-339-5p
WAC-AS1	ZBTB4	hsa-miR-106b-5p, hsa-miR-17-5p, hsa-miR-93-5p
WAC-AS1	XIAP	hsa-miR-192-5p, hsa-miR-215-5p, hsa-miR-23a-3p, hsa-miR-24-3p
WAC-AS1	WNK1	hsa-miR-192-5p, hsa-miR-215-5p, hsa-miR-27a-3p, hsa-miR-506-3p
WAC-AS1	TAB3	hsa-miR-15a-5p, hsa-miR-15b-5p, hsa-miR-16-5p, hsa-miR-195-5p, hsa-miR-23b-3p, hsa-miR-497-5p
WAC-AS1	SP1	hsa-miR-1-3p, hsa-miR-145-5p, hsa-miR-150-5p, hsa-miR-218-5p, hsa-miR-24-3p, hsa-miR-27a-3p, hsa-miR-33a-5p
WAC-AS1	RPS6KB1	hsa-miR-145-5p, hsa-miR-16-5p, hsa-miR-195-5p, hsa-miR-218-5p, hsa-miR-497-5p
WAC-AS1	RBL2	hsa-miR-106a-5p, hsa-miR-106b-5p, hsa-miR-17-5p, hsa-miR-20a-5p
WAC-AS1	PRKCE	hsa-miR-107, hsa-miR-139-5p, hsa-miR-1-3p
WAC-AS1	NR4A2	hsa-miR-217, hsa-miR-302d-3p, hsa-miR-372-3p
WAC-AS1	MEF2D	hsa-miR-103a-3p, hsa-miR-17-5p, hsa-miR-20a-5p
WAC-AS1	JAK1	hsa-miR-106b-5p, hsa-miR-107, hsa-miR-17-5p, hsa-miR-373-3p
WAC-AS1	CBL	hsa-miR-150-5p, hsa-miR-188-3p, hsa-miR-216a-5p
WAC-AS1	AKT3	hsa-miR-15a-5p, hsa-miR-15b-5p, hsa-miR-16-5p, hsa-miR-20b-5p, hsa-miR-519d-3p
VDAC1P8	NRAS	hsa-let-7a-5p, hsa-let-7b-5p, hsa-miR-181a-5p
VDAC1P8	PRDM1	hsa-let-7a-5p, hsa-let-7b-5p, hsa-let-7f-5p
USP3-AS1	TDG	hsa-miR-29a-3p, hsa-miR-29b-3p, hsa-miR-29c-3p
USP3-AS1	RAP1B	hsa-miR-181a-5p, hsa-miR-181b-5p, hsa-miR-181d-5p
UBXN8	TNFRSF10B	hsa-let-7a-5p, hsa-let-7b-5p, hsa-let-7c-5p, hsa-let-7d-5p, hsa-let-7e-5p, hsa-let-7g-5p
UBXN8	NRAS	hsa-let-7a-5p, hsa-let-7b-5p, hsa-let-7c-5p, hsa-miR-98-5p
UBXN8	CASP3	hsa-let-7a-5p, hsa-let-7c-5p, hsa-let-7g-5p, hsa-miR-98-5p
UBL7-AS1	LIN28B	hsa-let-7a-5p, hsa-let-7b-5p, hsa-miR-125b-5p
UBL7-AS1	E2F2	hsa-let-7a-5p, hsa-let-7b-5p, hsa-miR-125b-5p
UBL7-AS1	AURKB	hsa-let-7a-5p, hsa-let-7e-5p, hsa-let-7i-5p
UBL7-AS1	LIN28A	hsa-let-7a-5p, hsa-let-7b-5p, hsa-let-7e-5p, hsa-miR-125a-5p, hsa-miR-125b-5p
UBL7-AS1	EZH2	hsa-let-7a-5p, hsa-let-7b-5p, hsa-let-7e-5p
TUNAR	TP53	hsa-miR-30a-5p, hsa-miR-30b-5p, hsa-miR-30c-5p, hsa-miR-30d-5p, hsa-miR-30e-5p
TUNAR	SMAD1	hsa-miR-30a-5p, hsa-miR-30b-5p, hsa-miR-30c-5p, hsa-miR-30d-5p
TUNAR	NOTCH1	hsa-miR-30a-5p, hsa-miR-30b-5p, hsa-miR-30c-5p, hsa-miR-30d-5p, hsa-miR-30e-5p
TUNAR	CCND2	hsa-miR-106b-5p, hsa-miR-20a-5p, hsa-miR-30c-5p
TUG1	TP53	hsa-miR-151a-5p, hsa-miR-15a-5p, hsa-miR-16-5p, hsa-miR-17-5p, hsa-miR-200a-3p, hsa-miR-205-5p, hsa-miR-221-3p, hsa-miR-222-3p, hsa-miR-24-3p, hsa-miR-25-3p, hsa-miR-27a-3p, hsa-miR-28-5p, hsa-miR-29b-3p, hsa-miR-29c-3p, hsa-miR-300, hsa-miR-30a-5p, hsa-miR-30b-5p, hsa-miR-30c-5p, hsa-miR-30d-5p, hsa-miR-30e-5p, hsa-miR-34a-5p, hsa-miR-375
TUG1	PTEN	hsa-miR-103a-3p, hsa-miR-106a-5p, hsa-miR-106b-5p, hsa-miR-107, hsa-miR-128-3p, hsa-miR-130a-3p, hsa-miR-130a-5p, hsa-miR-130b-3p, hsa-miR-141-3p, hsa-miR-142-5p, hsa-miR-144-3p, hsa-miR-152-3p, hsa-miR-153-3p, hsa-miR-17-3p, hsa-miR-17-5p, hsa-miR-181a-5p, hsa-miR-181b-5p, hsa-miR-181c-5p, hsa-miR-182-5p, hsa-miR-18a-5p, hsa-miR-190b, hsa-miR-193a-3p, hsa-miR-200a-3p, hsa-miR-200c-3p, hsa-miR-20…
TUG1	PAK4	hsa-miR-145-5p, hsa-miR-199a-3p, hsa-miR-199b-3p, hsa-miR-22-3p, hsa-miR-24-3p
TUG1	HK2	hsa-miR-143-3p, hsa-miR-145-5p, hsa-miR-181b-5p, hsa-miR-199a-5p, hsa-miR-98-5p
TUG1	RDX	hsa-miR-196a-5p, hsa-miR-196b-5p, hsa-miR-31-5p, hsa-miR-409-3p
TUG1	CLIC4	hsa-miR-106b-5p, hsa-miR-122-5p, hsa-miR-17-3p, hsa-miR-17-5p, hsa-miR-18a-5p, hsa-miR-20a-5p, hsa-miR-25-3p, hsa-miR-93-5p
TUG1	CCND1	hsa-let-7a-3p, hsa-let-7b-5p, hsa-let-7e-5p, hsa-let-7f-5p, hsa-miR-101-3p, hsa-miR-106a-5p, hsa-miR-106b-5p, hsa-miR-135a-5p, hsa-miR-138-5p, hsa-miR-1-3p, hsa-miR-141-3p, hsa-miR-145-5p, hsa-miR-152-3p, hsa-miR-15a-5p, hsa-miR-15b-5p, hsa-miR-16-1-3p, hsa-miR-16-5p, hsa-miR-17-5p, hsa-miR-182-5p, hsa-miR-193a-3p, hsa-miR-193b-3p, hsa-miR-195-5p, hsa-miR-196a-5p, hsa-miR-19b-1-5p, hsa-miR-200a-3…
TUG1	AKT1	hsa-let-7b-5p, hsa-miR-122-5p, hsa-miR-138-5p, hsa-miR-143-3p, hsa-miR-17-5p, hsa-miR-182-5p, hsa-miR-192-5p, hsa-miR-196b-5p, hsa-miR-199a-3p, hsa-miR-205-5p, hsa-miR-206, hsa-miR-22-3p, hsa-miR-29b-3p, hsa-miR-340-5p, hsa-miR-34a-5p, hsa-miR-382-3p, hsa-miR-382-5p, hsa-miR-409-3p, hsa-miR-494-3p, hsa-miR-495-3p, hsa-miR-542-3p, hsa-miR-708-5p
TUG1	TIMP3	hsa-miR-103a-3p, hsa-miR-17-3p, hsa-miR-17-5p, hsa-miR-181b-5p, hsa-miR-20a-5p, hsa-miR-21-5p, hsa-miR-221-3p, hsa-miR-222-3p
TUG1	PELI1	hsa-miR-106b-5p, hsa-miR-17-3p, hsa-miR-17-5p, hsa-miR-18a-5p, hsa-miR-20a-5p, hsa-miR-25-3p, hsa-miR-93-5p
TUG1	BACE1	hsa-miR-107, hsa-miR-15a-5p, hsa-miR-16-5p, hsa-miR-29a-3p, hsa-miR-29b-3p, hsa-miR-29c-3p, hsa-miR-328-3p, hsa-miR-9-5p
TUG1	YOD1	hsa-miR-106b-5p, hsa-miR-17-3p, hsa-miR-17-5p, hsa-miR-18a-5p, hsa-miR-20a-5p, hsa-miR-21-5p, hsa-miR-25-3p, hsa-miR-93-5p
TUG1	TP53INP1	hsa-miR-130b-3p, hsa-miR-142-5p, hsa-miR-17-5p, hsa-miR-182-5p, hsa-miR-20a-5p, hsa-miR-93-5p, hsa-miR-96-5p
TUG1	TIMP2	hsa-miR-106a-5p, hsa-miR-17-5p, hsa-miR-200c-3p, hsa-miR-20a-5p, hsa-miR-301a-3p, hsa-miR-429, hsa-miR-519d-3p
TUG1	TET2	hsa-miR-101-3p, hsa-miR-22-3p, hsa-miR-26a-5p, hsa-miR-29a-3p, hsa-miR-29b-3p, hsa-miR-29c-3p, hsa-miR-7-5p
TUG1	STAT3	hsa-let-7a-5p, hsa-let-7c-5p, hsa-miR-106a-5p, hsa-miR-106b-5p, hsa-miR-130b-3p, hsa-miR-148a-3p, hsa-miR-17-5p, hsa-miR-181a-5p, hsa-miR-20a-5p, hsa-miR-20b-5p, hsa-miR-21-3p, hsa-miR-21-5p, hsa-miR-223-3p, hsa-miR-23a-3p, hsa-miR-29b-1-5p, hsa-miR-29b-3p, hsa-miR-340-5p, hsa-miR-375, hsa-miR-519d-3p, hsa-miR-92a-3p
TUG1	SRF	hsa-miR-101-3p, hsa-miR-122-5p, hsa-miR-1-3p, hsa-miR-200a-3p, hsa-miR-483-3p, hsa-miR-9-5p
TUG1	SRC	hsa-miR-205-5p, hsa-miR-23b-3p, hsa-miR-31-5p, hsa-miR-33a-5p, hsa-miR-33b-5p, hsa-miR-34a-5p
TUG1	SOX9	hsa-miR-101-3p, hsa-miR-138-5p, hsa-miR-1-3p, hsa-miR-140-5p, hsa-miR-145-5p, hsa-miR-206, hsa-miR-495-3p
TUG1	SOX5	hsa-miR-132-3p, hsa-miR-15a-5p, hsa-miR-16-5p, hsa-miR-194-5p, hsa-miR-21-5p
TUG1	SMURF1	hsa-miR-140-5p, hsa-miR-15b-5p, hsa-miR-17-5p, hsa-miR-497-5p
TUG1	SMAD5	hsa-miR-135a-5p, hsa-miR-135b-5p, hsa-miR-222-3p, hsa-miR-23a-3p, hsa-miR-27a-3p
TUG1	SMAD4	hsa-miR-130a-3p, hsa-miR-130b-3p, hsa-miR-144-3p, hsa-miR-17-5p, hsa-miR-182-5p, hsa-miR-183-5p, hsa-miR-18a-5p, hsa-miR-199a-5p, hsa-miR-205-5p, hsa-miR-20a-5p, hsa-miR-224-5p, hsa-miR-26a-5p, hsa-miR-26b-5p, hsa-miR-27a-3p, hsa-miR-301a-3p, hsa-miR-31-5p, hsa-miR-34a-3p, hsa-miR-34a-5p, hsa-miR-421, hsa-miR-454-3p, hsa-miR-483-3p
TUG1	SMAD1	hsa-miR-205-5p, hsa-miR-26a-5p, hsa-miR-26b-5p, hsa-miR-30a-5p, hsa-miR-30b-5p, hsa-miR-30c-5p, hsa-miR-30d-5p
TUG1	SIRT1	hsa-miR-128-3p, hsa-miR-132-3p, hsa-miR-138-5p, hsa-miR-142-5p, hsa-miR-181a-5p, hsa-miR-181b-5p, hsa-miR-181c-5p, hsa-miR-199a-5p, hsa-miR-199b-5p, hsa-miR-200c-3p, hsa-miR-216a-5p, hsa-miR-221-3p, hsa-miR-22-3p, hsa-miR-23b-3p, hsa-miR-29c-3p, hsa-miR-34a-3p, hsa-miR-34a-5p, hsa-miR-449a, hsa-miR-449b-5p, hsa-miR-543, hsa-miR-92a-3p, hsa-miR-9-5p
TUG1	SETD2	hsa-miR-106b-5p, hsa-miR-186-5p, hsa-miR-199a-5p, hsa-miR-199b-5p, hsa-miR-21-5p, hsa-miR-526b-3p
TUG1	RPS6KB1	hsa-miR-122-5p, hsa-miR-145-5p, hsa-miR-16-5p, hsa-miR-195-5p, hsa-miR-200c-3p, hsa-miR-382-5p, hsa-miR-497-5p
TUG1	RBL2	hsa-miR-106a-5p, hsa-miR-106b-5p, hsa-miR-17-5p, hsa-miR-20a-5p
TUG1	RASA1	hsa-miR-132-3p, hsa-miR-21-5p, hsa-miR-31-5p, hsa-miR-335-5p
TUG1	RAF1	hsa-miR-132-3p, hsa-miR-139-5p, hsa-miR-16-5p, hsa-miR-195-5p, hsa-miR-497-5p, hsa-miR-7-5p
TUG1	PURA	hsa-miR-106b-5p, hsa-miR-15a-5p, hsa-miR-15b-5p, hsa-miR-16-5p, hsa-miR-20a-5p, hsa-miR-93-5p
TUG1	PTPRD	hsa-miR-135a-5p, hsa-miR-141-3p, hsa-miR-200a-3p, hsa-miR-200c-3p, hsa-miR-429
TUG1	PTK2	hsa-miR-135a-5p, hsa-miR-138-5p, hsa-miR-193a-3p, hsa-miR-379-5p, hsa-miR-543, hsa-miR-7-5p
TUG1	PPM1D	hsa-miR-145-5p, hsa-miR-153-3p, hsa-miR-15b-5p, hsa-miR-16-5p, hsa-miR-29a-3p
TUG1	PHLPP1	hsa-miR-141-3p, hsa-miR-15a-5p, hsa-miR-17-5p, hsa-miR-18a-5p, hsa-miR-190a-5p, hsa-miR-224-5p, hsa-miR-3127-5p, hsa-miR-375, hsa-miR-92a-3p
TUG1	PDGFRA	hsa-let-7b-5p, hsa-miR-130a-3p, hsa-miR-130b-3p, hsa-miR-140-5p, hsa-miR-29b-3p, hsa-miR-34a-5p, hsa-miR-34c-5p, hsa-miR-449a, hsa-miR-449b-5p
TUG1	PARP1	hsa-let-7a-5p, hsa-miR-216b-5p, hsa-miR-223-3p, hsa-miR-335-5p, hsa-miR-708-5p
TUG1	NOTCH2	hsa-miR-107, hsa-miR-181c-5p, hsa-miR-23b-3p, hsa-miR-326, hsa-miR-34a-5p, hsa-miR-9-3p, hsa-miR-9-5p
TUG1	NOTCH1	hsa-miR-101-3p, hsa-miR-129-5p, hsa-miR-139-5p, hsa-miR-144-3p, hsa-miR-181a-5p, hsa-miR-200c-3p, hsa-miR-23b-3p, hsa-miR-24-3p, hsa-miR-27b-3p, hsa-miR-30a-3p, hsa-miR-30a-5p, hsa-miR-30b-5p, hsa-miR-30c-5p, hsa-miR-30d-5p, hsa-miR-30e-5p, hsa-miR-326, hsa-miR-34a-5p, hsa-miR-34c-5p, hsa-miR-363-3p, hsa-miR-410-3p, hsa-miR-449a, hsa-miR-9-5p
TUG1	NFIA	hsa-miR-107, hsa-miR-181b-5p, hsa-miR-21-5p, hsa-miR-223-3p, hsa-miR-29a-3p, hsa-miR-382-5p, hsa-miR-424-5p
TUG1	NFE2L2	hsa-miR-142-5p, hsa-miR-144-3p, hsa-miR-153-3p, hsa-miR-27a-3p
TUG1	NCOA3	hsa-miR-137, hsa-miR-17-3p, hsa-miR-17-5p, hsa-miR-18a-5p, hsa-miR-21-5p, hsa-miR-29b-3p, hsa-miR-33a-5p, hsa-miR-98-5p
TUG1	NCAM1	hsa-miR-122-5p, hsa-miR-200c-3p, hsa-miR-210-3p, hsa-miR-30a-5p
TUG1	MTSS1	hsa-miR-135a-5p, hsa-miR-15b-5p, hsa-miR-182-5p, hsa-miR-96-5p
TUG1	MEF2D	hsa-miR-103a-3p, hsa-miR-122-5p, hsa-miR-17-5p, hsa-miR-18a-5p, hsa-miR-20a-5p
TUG1	MECP2	hsa-miR-122-5p, hsa-miR-130a-3p, hsa-miR-181c-5p, hsa-miR-212-3p, hsa-miR-30a-3p, hsa-miR-340-5p, hsa-miR-432-5p
TUG1	LDHB	hsa-miR-210-3p, hsa-miR-23a-3p, hsa-miR-24-3p, hsa-miR-375
TUG1	KRAS	hsa-let-7a-5p, hsa-let-7f-5p, hsa-let-7g-5p, hsa-miR-1-3p, hsa-miR-143-3p, hsa-miR-152-3p, hsa-miR-16-5p, hsa-miR-181a-5p, hsa-miR-181c-5p, hsa-miR-193a-3p, hsa-miR-193b-3p, hsa-miR-199a-5p, hsa-miR-200c-3p, hsa-miR-206, hsa-miR-216b-5p, hsa-miR-224-5p, hsa-miR-27a-3p, hsa-miR-340-5p, hsa-miR-365a-3p, hsa-miR-384, hsa-miR-433-3p, hsa-miR-452-5p, hsa-miR-543, hsa-miR-613, hsa-miR-96-5p
TUG1	KDR	hsa-miR-15b-5p, hsa-miR-16-5p, hsa-miR-17-3p, hsa-miR-195-5p, hsa-miR-199a-3p, hsa-miR-19b-1-5p, hsa-miR-200c-3p, hsa-miR-24-3p, hsa-miR-326
TUG1	KDM5B	hsa-miR-137, hsa-miR-194-5p, hsa-miR-29a-3p, hsa-miR-424-5p
TUG1	ITGB1	hsa-miR-130b-3p, hsa-miR-143-3p, hsa-miR-183-5p, hsa-miR-192-5p, hsa-miR-29a-3p, hsa-miR-29b-3p, hsa-miR-29c-3p, hsa-miR-9-3p
TUG1	IGF1R	hsa-let-7a-5p, hsa-let-7b-5p, hsa-let-7c-5p, hsa-let-7e-5p, hsa-miR-122-5p, hsa-miR-125b-2-3p, hsa-miR-138-5p, hsa-miR-139-5p, hsa-miR-140-5p, hsa-miR-141-3p, hsa-miR-143-3p, hsa-miR-145-5p, hsa-miR-148a-3p, hsa-miR-152-3p, hsa-miR-16-5p, hsa-miR-181b-5p, hsa-miR-194-5p, hsa-miR-21-5p, hsa-miR-223-3p, hsa-miR-26b-5p, hsa-miR-320a, hsa-miR-335-5p, hsa-miR-375, hsa-miR-376a-3p, hsa-miR-378a-3p, hsa…
TUG1	HIF1A	hsa-miR-106a-5p, hsa-miR-106b-5p, hsa-miR-107, hsa-miR-138-5p, hsa-miR-142-5p, hsa-miR-17-5p, hsa-miR-186-5p, hsa-miR-18a-5p, hsa-miR-18b-5p, hsa-miR-199a-5p, hsa-miR-199b-5p, hsa-miR-20a-5p, hsa-miR-20b-5p, hsa-miR-210-3p, hsa-miR-22-3p, hsa-miR-23b-3p, hsa-miR-27a-3p, hsa-miR-338-3p, hsa-miR-33a-5p, hsa-miR-382-5p, hsa-miR-424-5p, hsa-miR-429, hsa-miR-433-3p
TUG1	HDAC4	hsa-miR-1-3p, hsa-miR-140-5p, hsa-miR-22-3p, hsa-miR-29b-3p, hsa-miR-30c-5p, hsa-miR-381-3p, hsa-miR-9-5p
TUG1	FN1	hsa-let-7g-5p, hsa-miR-132-3p, hsa-miR-1-3p, hsa-miR-140-3p, hsa-miR-200c-3p, hsa-miR-206, hsa-miR-26a-5p, hsa-miR-26b-5p, hsa-miR-29b-3p
TUG1	FMR1	hsa-miR-101-3p, hsa-miR-129-5p, hsa-miR-130b-3p, hsa-miR-221-3p
TUG1	FLT1	hsa-miR-142-3p, hsa-miR-181a-5p, hsa-miR-199a-3p, hsa-miR-200c-3p, hsa-miR-222-3p, hsa-miR-24-3p
TUG1	FGA	hsa-miR-144-3p, hsa-miR-29a-3p, hsa-miR-29b-3p, hsa-miR-29c-3p, hsa-miR-409-3p
TUG1	FASN	hsa-miR-1-3p, hsa-miR-195-5p, hsa-miR-30c-5p, hsa-miR-424-5p, hsa-miR-532-5p
TUG1	DNMT3A	hsa-miR-101-3p, hsa-miR-143-3p, hsa-miR-194-5p, hsa-miR-200c-3p, hsa-miR-29a-3p, hsa-miR-29b-3p, hsa-miR-29c-3p
TUG1	CTNND1	hsa-miR-145-5p, hsa-miR-29c-3p, hsa-miR-409-3p, hsa-miR-98-5p
TUG1	CRKL	hsa-miR-15a-5p, hsa-miR-200c-3p, hsa-miR-320a, hsa-miR-335-5p, hsa-miR-429
TUG1	CPEB4	hsa-let-7b-5p, hsa-miR-145-5p, hsa-miR-26a-5p, hsa-miR-29a-3p, hsa-miR-550a-5p
TUG1	COL4A2	hsa-miR-147b, hsa-miR-210-3p, hsa-miR-29a-3p, hsa-miR-29b-3p, hsa-miR-29c-3p
TUG1	COL4A1	hsa-miR-140-3p, hsa-miR-17-5p, hsa-miR-20a-5p, hsa-miR-21-5p, hsa-miR-29a-3p, hsa-miR-29b-3p, hsa-miR-29c-3p
TUG1	COL1A2	hsa-let-7g-5p, hsa-miR-26b-5p, hsa-miR-29a-3p, hsa-miR-29c-3p
TUG1	COL1A1	hsa-miR-129-5p, hsa-miR-143-3p, hsa-miR-29b-1-5p, hsa-miR-29b-3p, hsa-miR-29c-3p
TUG1	CLIP1	hsa-miR-106b-5p, hsa-miR-17-3p, hsa-miR-17-5p, hsa-miR-18a-5p, hsa-miR-20a-5p, hsa-miR-25-3p, hsa-miR-93-5p
TUG1	CDK6	hsa-let-7a-5p, hsa-let-7b-5p, hsa-miR-103a-3p, hsa-miR-107, hsa-miR-129-2-3p, hsa-miR-129-5p, hsa-miR-137, hsa-miR-145-5p, hsa-miR-16-5p, hsa-miR-195-5p, hsa-miR-196a-5p, hsa-miR-200a-3p, hsa-miR-26a-5p, hsa-miR-26b-5p, hsa-miR-29a-3p, hsa-miR-29b-3p, hsa-miR-29c-3p, hsa-miR-30a-3p, hsa-miR-320a, hsa-miR-340-5p, hsa-miR-34a-3p, hsa-miR-34a-5p, hsa-miR-34c-5p, hsa-miR-378a-3p, hsa-miR-424-5p, hsa-…
TUG1	CDH2	hsa-miR-145-5p, hsa-miR-194-5p, hsa-miR-196a-5p, hsa-miR-199a-5p, hsa-miR-200a-3p, hsa-miR-338-3p, hsa-miR-34a-5p
TUG1	BRCA1	hsa-miR-125a-3p, hsa-miR-15a-5p, hsa-miR-16-5p, hsa-miR-182-5p, hsa-miR-206, hsa-miR-20b-5p, hsa-miR-24-3p, hsa-miR-335-5p
TUG1	BMPR2	hsa-miR-135a-5p, hsa-miR-135b-5p, hsa-miR-153-3p, hsa-miR-17-5p, hsa-miR-181c-5p, hsa-miR-20a-5p, hsa-miR-21-5p, hsa-miR-92a-3p
TUG1	BCL9	hsa-miR-30a-5p, hsa-miR-30b-5p, hsa-miR-30c-2-3p, hsa-miR-30c-5p, hsa-miR-30d-5p
TUG1	BCL2	hsa-miR-135a-5p, hsa-miR-136-5p, hsa-miR-139-5p, hsa-miR-141-3p, hsa-miR-143-3p, hsa-miR-148a-3p, hsa-miR-153-3p, hsa-miR-15a-5p, hsa-miR-15b-5p, hsa-miR-16-1-3p, hsa-miR-16-5p, hsa-miR-17-5p, hsa-miR-181a-5p, hsa-miR-181b-5p, hsa-miR-181c-5p, hsa-miR-181d-5p, hsa-miR-182-5p, hsa-miR-18a-5p, hsa-miR-190b, hsa-miR-192-5p, hsa-miR-193a-3p, hsa-miR-195-5p, hsa-miR-200c-3p, hsa-miR-205-5p, hsa-miR-20…
TUG1	BAP1	hsa-miR-141-3p, hsa-miR-200a-3p, hsa-miR-200c-3p, hsa-miR-31-5p, hsa-miR-429
TUG1	ATM	hsa-miR-101-3p, hsa-miR-106a-5p, hsa-miR-181a-5p, hsa-miR-181b-5p, hsa-miR-18a-5p, hsa-miR-223-3p, hsa-miR-26a-5p, hsa-miR-374a-5p, hsa-miR-421
TUG1	APC	hsa-miR-106a-5p, hsa-miR-106b-5p, hsa-miR-129-5p, hsa-miR-135a-5p, hsa-miR-135b-5p, hsa-miR-142-3p, hsa-miR-27a-3p
TUG1	ADAR	hsa-miR-1-3p, hsa-miR-17-5p, hsa-miR-20a-5p, hsa-miR-432-5p
TUG1	ADAM17	hsa-miR-122-5p, hsa-miR-145-5p, hsa-miR-152-3p, hsa-miR-26a-5p, hsa-miR-338-3p
TUG1	ADAM10	hsa-miR-103a-3p, hsa-miR-122-5p, hsa-miR-448, hsa-miR-449a, hsa-miR-655-3p
TUG1	ACVR2B	hsa-miR-141-3p, hsa-miR-192-5p, hsa-miR-194-5p, hsa-miR-200c-3p, hsa-miR-215-5p
TUG1	ACTB	hsa-miR-145-5p, hsa-miR-15a-5p, hsa-miR-15b-5p, hsa-miR-16-5p, hsa-miR-28-5p, hsa-miR-29b-3p, hsa-miR-33a-5p, hsa-miR-497-5p
TTTY15	CCNE2	hsa-miR-141-3p, hsa-miR-200a-3p, hsa-miR-30a-5p, hsa-miR-30b-5p
TTC28-AS1	TIMP3	hsa-miR-103a-3p, hsa-miR-17-5p, hsa-miR-20a-5p
TTC28-AS1	PELI1	hsa-miR-106b-5p, hsa-miR-17-5p, hsa-miR-18a-5p, hsa-miR-20a-5p, hsa-miR-93-5p
TTC28-AS1	MYB	hsa-miR-103a-3p, hsa-miR-106a-5p, hsa-miR-107, hsa-miR-15a-5p
TTC28-AS1	RBL1	hsa-miR-106b-5p, hsa-miR-17-5p, hsa-miR-20a-5p
TTC28-AS1	RB1	hsa-miR-106a-5p, hsa-miR-106b-5p, hsa-miR-17-5p, hsa-miR-182-5p, hsa-miR-20a-5p
TTC28-AS1	MAP3K1	hsa-miR-302a-3p, hsa-miR-302b-3p, hsa-miR-302d-3p
TTC28-AS1	CCND2	hsa-miR-106b-5p, hsa-miR-15a-5p, hsa-miR-17-5p, hsa-miR-182-5p, hsa-miR-20a-5p, hsa-miR-302b-3p, hsa-miR-302d-3p
TTC28-AS1	BRCA1	hsa-miR-15a-5p, hsa-miR-182-5p, hsa-miR-20b-5p
TTC28-AS1	AKT3	hsa-miR-15a-5p, hsa-miR-20b-5p, hsa-miR-519d-3p
TRPM2-AS	HIF1A	hsa-miR-138-5p, hsa-miR-199a-5p, hsa-miR-199b-5p
TRHDE-AS1	MAP2K1	hsa-miR-181a-5p, hsa-miR-181b-5p, hsa-miR-204-5p, hsa-miR-34a-5p, hsa-miR-449a
TRHDE-AS1	SIRT1	hsa-miR-124-3p, hsa-miR-181a-5p, hsa-miR-181b-5p, hsa-miR-181c-5p, hsa-miR-204-5p, hsa-miR-34a-5p, hsa-miR-449a, hsa-miR-449b-5p, hsa-miR-9-5p
TRHDE-AS1	ATG5	hsa-miR-181a-5p, hsa-miR-34a-5p, hsa-miR-9-5p
TRAF3IP2-AS1	KIT	hsa-miR-137, hsa-miR-218-5p, hsa-miR-34a-5p
TRAF3IP2-AS1	CDH1	hsa-miR-138-5p, hsa-miR-23a-3p, hsa-miR-34a-5p, hsa-miR-9-5p, hsa-miR-96-5p
TRAF3IP2-AS1	CDKN1B	hsa-miR-182-5p, hsa-miR-190a-5p, hsa-miR-194-5p, hsa-miR-218-5p
TRAF3IP2-AS1	TP53INP1	hsa-miR-125b-5p, hsa-miR-182-5p, hsa-miR-96-5p
TRAF3IP2-AS1	SRSF1	hsa-miR-10a-5p, hsa-miR-10b-5p, hsa-miR-9-5p
TRAF3IP2-AS1	SIRT1	hsa-miR-138-5p, hsa-miR-216a-5p, hsa-miR-23b-3p, hsa-miR-34a-5p, hsa-miR-449a, hsa-miR-449b-5p, hsa-miR-9-5p
TRAF3IP2-AS1	PDGFRA	hsa-miR-218-5p, hsa-miR-34a-5p, hsa-miR-34c-5p, hsa-miR-449a, hsa-miR-449b-5p
TRAF3IP2-AS1	NTRK3	hsa-miR-125a-5p, hsa-miR-125b-5p, hsa-miR-185-5p, hsa-miR-339-5p, hsa-miR-9-5p
TRAF3IP2-AS1	NOTCH1	hsa-miR-10b-5p, hsa-miR-23b-3p, hsa-miR-34a-5p, hsa-miR-34c-5p, hsa-miR-449a, hsa-miR-9-5p
TRAF3IP2-AS1	NCOR2	hsa-miR-10a-5p, hsa-miR-10b-5p, hsa-miR-125b-5p
TRAF3IP2-AS1	NANOG	hsa-miR-150-5p, hsa-miR-34a-5p, hsa-miR-34c-5p
TRAF3IP2-AS1	MYCN	hsa-miR-34a-5p, hsa-miR-34c-5p, hsa-miR-449a, hsa-miR-449b-5p
TRAF3IP2-AS1	ETS1	hsa-miR-125b-5p, hsa-miR-126-5p, hsa-miR-23b-3p, hsa-miR-9-5p
TRAF3IP2-AS1	E2F3	hsa-miR-125a-5p, hsa-miR-125b-5p, hsa-miR-34a-5p, hsa-miR-34c-5p, hsa-miR-377-3p, hsa-miR-449a
TRAF3IP2-AS1	CREB1	hsa-miR-10b-5p, hsa-miR-150-5p, hsa-miR-182-5p, hsa-miR-9-5p
TRAF3IP2-AS1	BCL2	hsa-miR-125a-5p, hsa-miR-125b-5p, hsa-miR-181d-5p, hsa-miR-182-5p, hsa-miR-190b, hsa-miR-34a-5p, hsa-miR-34c-5p, hsa-miR-449a, hsa-miR-9-5p
TPTEP1	MAPK9	hsa-miR-17-5p, hsa-miR-20b-5p, hsa-miR-93-5p
TPTEP1	PTEN	hsa-miR-17-5p, hsa-miR-20b-5p, hsa-miR-93-5p
TPT1-AS1	FOXO1	hsa-miR-186-5p, hsa-miR-27a-3p, hsa-miR-27b-3p
TPT1-AS1	XIAP	hsa-miR-186-5p, hsa-miR-23a-3p, hsa-miR-24-3p
TPT1-AS1	SMAD2	hsa-let-7g-5p, hsa-miR-206, hsa-miR-27a-3p, hsa-miR-27b-3p
TPT1-AS1	PIK3CA	hsa-let-7b-5p, hsa-miR-126-5p, hsa-miR-1-3p
TPT1-AS1	LIN28A	hsa-let-7a-5p, hsa-let-7b-5p, hsa-let-7e-5p
TPT1-AS1	KRAS	hsa-let-7a-5p, hsa-let-7f-5p, hsa-let-7g-5p, hsa-miR-1-3p, hsa-miR-206, hsa-miR-27a-3p, hsa-miR-613
TPT1-AS1	IGF1R	hsa-let-7a-5p, hsa-let-7b-5p, hsa-let-7c-5p, hsa-let-7e-5p, hsa-miR-15b-3p, hsa-miR-4458
TPT1-AS1	ETS1	hsa-miR-126-5p, hsa-miR-1-3p, hsa-miR-23b-3p
TPT1-AS1	CCND2	hsa-let-7a-5p, hsa-let-7b-5p, hsa-miR-206, hsa-miR-98-5p
TP73-AS1	MMP2	hsa-miR-125b-5p, hsa-miR-141-3p, hsa-miR-145-5p, hsa-miR-218-5p, hsa-miR-223-3p, hsa-miR-29b-3p, hsa-miR-326, hsa-miR-338-3p, hsa-miR-377-3p
TP73-AS1	SMO	hsa-miR-125b-5p, hsa-miR-218-5p, hsa-miR-324-5p, hsa-miR-326, hsa-miR-338-3p
TP73-AS1	PAK4	hsa-miR-145-5p, hsa-miR-199a-3p, hsa-miR-199b-3p, hsa-miR-22-3p, hsa-miR-24-3p
TP73-AS1	LDHA	hsa-miR-200b-3p, hsa-miR-23a-3p, hsa-miR-24-3p, hsa-miR-34a-5p
TP73-AS1	HSPA5	hsa-miR-181a-5p, hsa-miR-199a-5p, hsa-miR-384, hsa-miR-495-3p
TP73-AS1	HK2	hsa-miR-125a-5p, hsa-miR-125b-5p, hsa-miR-145-5p, hsa-miR-199a-5p, hsa-miR-98-5p
TP73-AS1	GATA4	hsa-miR-1-3p, hsa-miR-200b-3p, hsa-miR-200c-3p
TP73-AS1	GAPDH	hsa-miR-141-3p, hsa-miR-155-5p, hsa-miR-200a-3p, hsa-miR-29b-3p
TP73-AS1	BMP7	hsa-miR-22-3p, hsa-miR-342-3p, hsa-miR-34a-5p, hsa-miR-542-3p
TP73-AS1	ANGPT2	hsa-miR-125b-5p, hsa-miR-145-5p, hsa-miR-542-3p
TP73-AS1	FSCN1	hsa-miR-145-5p, hsa-miR-200b-3p, hsa-miR-24-3p, hsa-miR-326, hsa-miR-429
TP73-AS1	CLIC4	hsa-miR-122-5p, hsa-miR-155-5p, hsa-miR-17-3p, hsa-miR-18a-5p, hsa-miR-25-3p
TP73-AS1	AKT1	hsa-let-7b-5p, hsa-miR-100-5p, hsa-miR-10b-5p, hsa-miR-122-5p, hsa-miR-125a-5p, hsa-miR-125b-5p, hsa-miR-138-5p, hsa-miR-199a-3p, hsa-miR-206, hsa-miR-22-3p, hsa-miR-29b-3p, hsa-miR-302a-3p, hsa-miR-340-5p, hsa-miR-34a-5p, hsa-miR-382-5p, hsa-miR-409-3p, hsa-miR-494-3p, hsa-miR-495-3p, hsa-miR-542-3p, hsa-miR-99a-5p
TP73-AS1	YAP1	hsa-miR-138-5p, hsa-miR-141-3p, hsa-miR-15a-5p, hsa-miR-16-5p, hsa-miR-195-5p, hsa-miR-199a-3p, hsa-miR-200a-3p, hsa-miR-27a-3p, hsa-miR-506-3p
TP73-AS1	TNFAIP3	hsa-let-7a-5p, hsa-let-7e-5p, hsa-miR-125a-5p, hsa-miR-125b-5p, hsa-miR-18a-5p, hsa-miR-29b-3p
TP73-AS1	TGFB2	hsa-miR-141-3p, hsa-miR-145-5p, hsa-miR-148a-3p, hsa-miR-199a-5p, hsa-miR-200a-3p, hsa-miR-29b-3p, hsa-miR-378a-3p
TP73-AS1	STAT5A	hsa-miR-141-3p, hsa-miR-223-3p, hsa-miR-296-3p, hsa-miR-29b-3p
TP73-AS1	STAT1	hsa-miR-140-5p, hsa-miR-145-5p, hsa-miR-155-5p, hsa-miR-223-3p
TP73-AS1	SPRY2	hsa-miR-122-5p, hsa-miR-23a-3p, hsa-miR-27a-3p, hsa-miR-27b-3p
TP73-AS1	SHC1	hsa-miR-141-3p, hsa-miR-200a-3p, hsa-miR-200b-3p, hsa-miR-200c-3p, hsa-miR-27b-3p, hsa-miR-429
TP73-AS1	NUMB	hsa-let-7c-5p, hsa-miR-31-5p, hsa-miR-34a-5p
TP73-AS1	NRP1	hsa-miR-148a-3p, hsa-miR-152-3p, hsa-miR-206, hsa-miR-338-3p, hsa-miR-9-5p
TP73-AS1	NCSTN	hsa-miR-16-5p, hsa-miR-186-5p, hsa-miR-24-3p
TP73-AS1	MAP3K11	hsa-miR-125b-5p, hsa-miR-138-5p, hsa-miR-199a-5p
TP73-AS1	LIF	hsa-miR-199a-5p, hsa-miR-223-3p, hsa-miR-346
TP73-AS1	LEF1	hsa-miR-218-5p, hsa-miR-27a-3p, hsa-miR-34a-5p, hsa-miR-449a
TP73-AS1	ITGB3	hsa-let-7a-5p, hsa-let-7c-5p, hsa-miR-17-3p, hsa-miR-338-3p, hsa-miR-98-5p
TP73-AS1	ITGA5	hsa-miR-148a-3p, hsa-miR-148b-3p, hsa-miR-152-3p, hsa-miR-17-3p, hsa-miR-31-5p, hsa-miR-326, hsa-miR-330-5p, hsa-miR-92a-3p
TP73-AS1	ITGA3	hsa-miR-199a-3p, hsa-miR-199a-5p, hsa-miR-199b-3p, hsa-miR-199b-5p
TP73-AS1	FOSL1	hsa-miR-138-5p, hsa-miR-200a-3p, hsa-miR-34a-5p, hsa-miR-34c-5p
TP73-AS1	FGFR3	hsa-miR-100-5p, hsa-miR-152-3p, hsa-miR-24-3p, hsa-miR-99a-5p
TP73-AS1	ERBB2	hsa-miR-125a-5p, hsa-miR-125b-5p, hsa-miR-199a-5p, hsa-miR-199b-5p, hsa-miR-22-3p, hsa-miR-25-3p, hsa-miR-331-3p, hsa-miR-34a-5p
TP73-AS1	DLC1	hsa-miR-200a-3p, hsa-miR-200b-3p, hsa-miR-200c-3p, hsa-miR-429
TP73-AS1	ADAM12	hsa-miR-200b-3p, hsa-miR-200c-3p, hsa-miR-29b-3p, hsa-miR-30b-3p
TP73-AS1	VEGFA	hsa-miR-107, hsa-miR-125a-5p, hsa-miR-1-3p, hsa-miR-140-5p, hsa-miR-141-3p, hsa-miR-145-5p, hsa-miR-15a-5p, hsa-miR-15b-5p, hsa-miR-16-5p, hsa-miR-181a-5p, hsa-miR-185-5p, hsa-miR-186-5p, hsa-miR-195-5p, hsa-miR-199a-3p, hsa-miR-199a-5p, hsa-miR-200b-3p, hsa-miR-200c-3p, hsa-miR-206, hsa-miR-223-3p, hsa-miR-23b-3p, hsa-miR-27b-3p, hsa-miR-29b-3p, hsa-miR-326, hsa-miR-34a-5p, hsa-miR-378a-3p, hsa-…
TP73-AS1	TIMP1	hsa-miR-145-5p, hsa-miR-181a-5p, hsa-miR-218-5p, hsa-miR-377-3p
TP73-AS1	SRF	hsa-miR-122-5p, hsa-miR-1-3p, hsa-miR-200a-3p, hsa-miR-9-5p
TP73-AS1	SMURF1	hsa-miR-140-5p, hsa-miR-15b-5p, hsa-miR-497-5p
TP73-AS1	PRDM1	hsa-let-7a-5p, hsa-let-7b-5p, hsa-let-7f-5p, hsa-miR-125b-5p, hsa-miR-127-3p, hsa-miR-223-3p, hsa-miR-9-5p
TP73-AS1	PODXL	hsa-miR-125b-5p, hsa-miR-145-5p, hsa-miR-199b-5p
TP73-AS1	PIAS3	hsa-miR-125b-5p, hsa-miR-18a-5p, hsa-miR-199a-5p
TP73-AS1	PDGFRB	hsa-miR-24-3p, hsa-miR-29b-3p, hsa-miR-34a-5p, hsa-miR-34c-5p, hsa-miR-449a, hsa-miR-449b-5p, hsa-miR-9-5p
TP73-AS1	NOTCH2	hsa-miR-107, hsa-miR-181c-5p, hsa-miR-191-5p, hsa-miR-23b-3p, hsa-miR-326, hsa-miR-34a-5p, hsa-miR-9-5p
TP73-AS1	LASP1	hsa-miR-138-5p, hsa-miR-1-3p, hsa-miR-206, hsa-miR-218-5p, hsa-miR-29b-3p, hsa-miR-92a-3p
TP73-AS1	IKBKB	hsa-miR-148a-3p, hsa-miR-199a-5p, hsa-miR-200b-3p, hsa-miR-200c-3p, hsa-miR-218-5p, hsa-miR-497-5p, hsa-miR-503-5p
TP73-AS1	HFE	hsa-miR-200a-3p, hsa-miR-200b-3p, hsa-miR-200c-3p
TP73-AS1	GJA1	hsa-miR-1-3p, hsa-miR-186-5p, hsa-miR-200a-3p, hsa-miR-206, hsa-miR-218-5p, hsa-miR-23a-3p, hsa-miR-23b-3p
TP73-AS1	GALNT7	hsa-miR-17-3p, hsa-miR-34a-5p, hsa-miR-34c-5p, hsa-miR-378a-3p
TP73-AS1	FOXJ3	hsa-miR-122-5p, hsa-miR-27b-3p, hsa-miR-494-3p
TP73-AS1	FN1	hsa-let-7g-5p, hsa-miR-1-3p, hsa-miR-200b-3p, hsa-miR-200c-3p, hsa-miR-206, hsa-miR-29b-3p
TP73-AS1	FLT1	hsa-miR-100-5p, hsa-miR-181a-5p, hsa-miR-199a-3p, hsa-miR-200b-3p, hsa-miR-200c-3p, hsa-miR-24-3p
TP73-AS1	CTNND1	hsa-miR-145-5p, hsa-miR-409-3p, hsa-miR-98-5p
TP73-AS1	CDK6	hsa-let-7a-5p, hsa-let-7b-5p, hsa-miR-103a-3p, hsa-miR-107, hsa-miR-129-2-3p, hsa-miR-145-5p, hsa-miR-16-5p, hsa-miR-185-5p, hsa-miR-191-5p, hsa-miR-195-5p, hsa-miR-200a-3p, hsa-miR-211-5p, hsa-miR-214-5p, hsa-miR-218-5p, hsa-miR-29b-3p, hsa-miR-340-5p, hsa-miR-34a-5p, hsa-miR-34c-5p, hsa-miR-377-3p, hsa-miR-378a-3p, hsa-miR-424-5p, hsa-miR-449a, hsa-miR-449b-5p, hsa-miR-494-3p, hsa-miR-497-5p, h…
TP73-AS1	CDH2	hsa-miR-145-5p, hsa-miR-199a-5p, hsa-miR-200a-3p, hsa-miR-218-5p, hsa-miR-338-3p, hsa-miR-34a-5p, hsa-miR-506-3p
TP73-AS1	CD44	hsa-miR-125b-5p, hsa-miR-145-5p, hsa-miR-199a-3p, hsa-miR-199a-5p, hsa-miR-328-3p, hsa-miR-34a-5p
TP73-AS1	BAP1	hsa-miR-141-3p, hsa-miR-200a-3p, hsa-miR-200b-3p, hsa-miR-200c-3p, hsa-miR-31-5p, hsa-miR-429
TP73-AS1	ADAM17	hsa-miR-122-5p, hsa-miR-145-5p, hsa-miR-152-3p, hsa-miR-338-3p
TP73-AS1	ACTB	hsa-miR-145-5p, hsa-miR-15a-5p, hsa-miR-15b-5p, hsa-miR-16-5p, hsa-miR-29b-3p, hsa-miR-497-5p
TP53TG1	HOXB5	hsa-miR-200b-3p, hsa-miR-200c-3p, hsa-miR-429
TMPO-AS1	WEE1	hsa-miR-106b-5p, hsa-miR-17-5p, hsa-miR-20a-5p
TMPO-AS1	MYB	hsa-miR-106a-5p, hsa-miR-200b-3p, hsa-miR-200c-3p, hsa-miR-429
TMPO-AS1	E2F1	hsa-miR-106a-5p, hsa-miR-106b-5p, hsa-miR-17-5p, hsa-miR-20a-5p, hsa-miR-519d-3p, hsa-miR-93-5p
TMPO-AS1	CDK2	hsa-miR-17-5p, hsa-miR-200c-3p, hsa-miR-20a-5p, hsa-miR-376a-3p
TMPO-AS1	RBL1	hsa-miR-106b-5p, hsa-miR-17-5p, hsa-miR-20a-5p
TMPO-AS1	KLHL20	hsa-miR-200b-3p, hsa-miR-200c-3p, hsa-miR-429
TMPO-AS1	EZH2	hsa-miR-137, hsa-miR-200b-3p, hsa-miR-429
TMPO-AS1	E2F3	hsa-miR-106b-5p, hsa-miR-17-5p, hsa-miR-200b-3p, hsa-miR-200c-3p, hsa-miR-20a-5p
TMPO-AS1	DNMT1	hsa-miR-17-5p, hsa-miR-200b-3p, hsa-miR-20a-5p, hsa-miR-429
TMPO-AS1	BCL2L11	hsa-miR-106b-5p, hsa-miR-17-5p, hsa-miR-20a-5p
TMEM161B-AS1	TCEAL1	hsa-miR-106b-5p, hsa-miR-17-5p, hsa-miR-20a-5p
TMEM161B-AS1	SMAD5	hsa-miR-135a-5p, hsa-miR-23a-3p, hsa-miR-27a-3p
TINCR	SMAD7	hsa-miR-217, hsa-miR-25-3p, hsa-miR-92b-3p
TINCR	SIRT1	hsa-miR-217, hsa-miR-22-3p, hsa-miR-92a-3p
THUMPD3-AS1	PELI1	hsa-miR-17-3p, hsa-miR-19a-3p, hsa-miR-19b-3p, hsa-miR-25-3p
THUMPD3-AS1	CDK4	hsa-miR-124-3p, hsa-miR-1-3p, hsa-miR-145-5p, hsa-miR-29a-3p, hsa-miR-34b-3p, hsa-miR-377-3p, hsa-miR-497-5p
THUMPD3-AS1	PRKCE	hsa-miR-107, hsa-miR-139-5p, hsa-miR-1-3p
THUMPD3-AS1	NFIA	hsa-miR-107, hsa-miR-181b-5p, hsa-miR-29a-3p, hsa-miR-382-5p
THUMPD3-AS1	LRP6	hsa-miR-183-5p, hsa-miR-29b-3p, hsa-miR-29c-3p
THUMPD3-AS1	HDAC4	hsa-miR-1-3p, hsa-miR-22-3p, hsa-miR-29b-3p, hsa-miR-30c-5p
THUMPD3-AS1	GSK3B	hsa-miR-183-5p, hsa-miR-26a-5p, hsa-miR-29a-3p, hsa-miR-29b-3p, hsa-miR-744-5p
THUMPD3-AS1	EZH2	hsa-miR-101-3p, hsa-miR-124-3p, hsa-miR-185-5p, hsa-miR-25-3p, hsa-miR-26a-5p, hsa-miR-26b-5p
THUMPD3-AS1	DNMT3B	hsa-miR-124-3p, hsa-miR-26a-5p, hsa-miR-29a-3p, hsa-miR-29b-3p, hsa-miR-29c-3p
THUMPD3-AS1	DNMT3A	hsa-miR-101-3p, hsa-miR-29a-3p, hsa-miR-29b-3p, hsa-miR-29c-3p
THUMPD3-AS1	BCL2L11	hsa-miR-181a-5p, hsa-miR-181b-5p, hsa-miR-19a-3p, hsa-miR-19b-3p, hsa-miR-25-3p, hsa-miR-32-5p, hsa-miR-363-3p, hsa-miR-423-3p, hsa-miR-92a-3p
THRB-AS1	FGB	hsa-miR-29a-3p, hsa-miR-29b-3p, hsa-miR-29c-3p
THAP9-AS1	NRAS	hsa-miR-145-5p, hsa-miR-148b-3p, hsa-miR-181a-5p
THAP9-AS1	MYB	hsa-miR-103a-3p, hsa-miR-107, hsa-miR-15a-5p, hsa-miR-16-5p, hsa-miR-195-5p
THAP9-AS1	HMGA1	hsa-miR-15a-5p, hsa-miR-16-5p, hsa-miR-195-5p
THAP9-AS1	E2F1	hsa-miR-135a-5p, hsa-miR-17-5p, hsa-miR-93-5p, hsa-miR-9-3p
THAP9-AS1	CCNE1	hsa-miR-103a-3p, hsa-miR-137, hsa-miR-15a-5p, hsa-miR-15b-5p, hsa-miR-16-5p, hsa-miR-195-5p
THAP9-AS1	RPS6KB1	hsa-miR-145-5p, hsa-miR-16-5p, hsa-miR-195-5p, hsa-miR-218-5p, hsa-miR-382-5p
THAP9-AS1	RAF1	hsa-miR-132-3p, hsa-miR-16-5p, hsa-miR-195-5p
THAP9-AS1	E2F3	hsa-miR-145-5p, hsa-miR-17-5p, hsa-miR-195-5p, hsa-miR-26a-1-3p
THAP9-AS1	BRCA1	hsa-miR-15a-5p, hsa-miR-16-5p, hsa-miR-20b-5p
TEX41	LIN28A	hsa-let-7a-5p, hsa-let-7b-5p, hsa-let-7e-5p
TEN1-CDK3	CDX2	hsa-miR-181a-5p, hsa-miR-181b-5p, hsa-miR-181c-5p
TEN1-CDK3	BIRC5	hsa-miR-150-5p, hsa-miR-218-5p, hsa-miR-497-5p
SVIL-AS1	CHUK	hsa-miR-15a-5p, hsa-miR-15b-5p, hsa-miR-16-5p, hsa-miR-195-5p
SVIL-AS1	PELI1	hsa-miR-106b-5p, hsa-miR-19a-3p, hsa-miR-19b-3p, hsa-miR-20a-5p, hsa-miR-25-3p
SVIL-AS1	BACE1	hsa-miR-107, hsa-miR-15a-5p, hsa-miR-16-5p, hsa-miR-19b-3p, hsa-miR-9-5p
SVIL-AS1	TAB3	hsa-miR-15a-5p, hsa-miR-15b-5p, hsa-miR-16-5p, hsa-miR-195-5p, hsa-miR-342-3p, hsa-miR-497-5p
SVIL-AS1	SMAD7	hsa-miR-106b-5p, hsa-miR-15b-5p, hsa-miR-195-5p, hsa-miR-20a-5p, hsa-miR-25-3p, hsa-miR-424-5p, hsa-miR-497-5p
SVIL-AS1	RPS6KB1	hsa-miR-16-5p, hsa-miR-195-5p, hsa-miR-497-5p
SVIL-AS1	MEF2D	hsa-miR-103a-3p, hsa-miR-19a-3p, hsa-miR-20a-5p
SVIL-AS1	MAPK1	hsa-miR-132-3p, hsa-miR-197-3p, hsa-miR-20a-5p, hsa-miR-9-3p
SVIL-AS1	MAP3K9	hsa-miR-148a-3p, hsa-miR-148b-3p, hsa-miR-24-3p
SVIL-AS1	AKT3	hsa-miR-15a-5p, hsa-miR-15b-5p, hsa-miR-16-5p
STEAP3-AS1	RAP1B	hsa-miR-181b-5p, hsa-miR-181d-5p, hsa-miR-28-5p
ST3GAL5-AS1	MYCN	hsa-let-7e-5p, hsa-miR-19a-3p, hsa-miR-19b-3p
SRRM2-AS1	SIRT7	hsa-miR-125a-5p, hsa-miR-125b-5p, hsa-miR-34a-5p
SOX2-OT	KIT	hsa-miR-137, hsa-miR-19a-3p, hsa-miR-218-5p, hsa-miR-34a-5p
SOX2-OT	HMGB1	hsa-miR-218-5p, hsa-miR-22-3p, hsa-miR-320a, hsa-miR-34a-5p
SOX2-OT	CDH1	hsa-miR-139-5p, hsa-miR-26a-5p, hsa-miR-34a-5p, hsa-miR-9-3p, hsa-miR-9-5p
SOX2-OT	HMGCR	hsa-miR-29a-3p, hsa-miR-29b-3p, hsa-miR-29c-3p
SOX2-OT	BMI1	hsa-miR-139-5p, hsa-miR-218-5p, hsa-miR-320a, hsa-miR-708-5p
SOX2-OT	PIK3CA	hsa-miR-126-5p, hsa-miR-139-5p, hsa-miR-1-3p, hsa-miR-148b-3p, hsa-miR-19a-3p
SOX2-OT	PDGFRA	hsa-miR-218-5p, hsa-miR-29b-3p, hsa-miR-34a-5p
SOX2-OT	NTRK3	hsa-miR-185-5p, hsa-miR-22-3p, hsa-miR-9-5p
SOX2-OT	MYCN	hsa-miR-19a-3p, hsa-miR-19b-3p, hsa-miR-29a-3p, hsa-miR-29b-3p, hsa-miR-29c-3p, hsa-miR-34a-5p
SOX2-OT	GSK3B	hsa-miR-26a-5p, hsa-miR-29a-3p, hsa-miR-29b-3p, hsa-miR-9-5p
SOX2-OT	CDC42	hsa-miR-137, hsa-miR-185-5p, hsa-miR-29a-3p, hsa-miR-29b-3p, hsa-miR-29c-3p
SOX2-OT	CCND2	hsa-miR-26a-5p, hsa-miR-29a-3p, hsa-miR-29b-3p, hsa-miR-29c-3p
SOX2-OT	AKT3	hsa-miR-29a-3p, hsa-miR-29b-3p, hsa-miR-29c-3p
SNRK-AS1	PDCD4	hsa-miR-106a-5p, hsa-miR-21-5p, hsa-miR-93-5p
SNRK-AS1	KIT	hsa-miR-199b-5p, hsa-miR-20a-5p, hsa-miR-34a-5p
SNRK-AS1	PELI1	hsa-miR-106b-5p, hsa-miR-17-5p, hsa-miR-20a-5p, hsa-miR-93-5p
SNRK-AS1	E2F1	hsa-miR-106a-5p, hsa-miR-106b-5p, hsa-miR-135a-5p, hsa-miR-17-5p, hsa-miR-20a-5p, hsa-miR-21-5p, hsa-miR-34a-5p, hsa-miR-519d-3p, hsa-miR-93-5p
SNRK-AS1	CDC25A	hsa-miR-21-5p, hsa-miR-34a-5p, hsa-miR-449a, hsa-miR-449b-5p
SNRK-AS1	YOD1	hsa-miR-106b-5p, hsa-miR-17-5p, hsa-miR-20a-5p, hsa-miR-21-5p, hsa-miR-93-5p
SNRK-AS1	TIMP2	hsa-miR-106a-5p, hsa-miR-17-5p, hsa-miR-20a-5p, hsa-miR-519d-3p
SNRK-AS1	STAT3	hsa-miR-106a-5p, hsa-miR-106b-5p, hsa-miR-17-5p, hsa-miR-20a-5p, hsa-miR-20b-5p, hsa-miR-21-5p, hsa-miR-519d-3p, hsa-miR-520c-3p
SNRK-AS1	SOX2	hsa-miR-145-5p, hsa-miR-21-5p, hsa-miR-34a-5p, hsa-miR-34c-5p
SNRK-AS1	SETD2	hsa-miR-106b-5p, hsa-miR-199a-5p, hsa-miR-199b-5p, hsa-miR-21-5p, hsa-miR-526b-3p
SNRK-AS1	ROCK1	hsa-miR-135a-5p, hsa-miR-145-5p, hsa-miR-335-5p
SNRK-AS1	RECK	hsa-miR-135b-5p, hsa-miR-21-5p, hsa-miR-590-5p
SNRK-AS1	RBL2	hsa-miR-106a-5p, hsa-miR-106b-5p, hsa-miR-17-5p, hsa-miR-20a-5p
SNRK-AS1	PDGFRB	hsa-miR-34a-5p, hsa-miR-34c-5p, hsa-miR-449a, hsa-miR-449b-5p
SNRK-AS1	PDGFRA	hsa-miR-34a-5p, hsa-miR-34c-5p, hsa-miR-449a, hsa-miR-449b-5p
SNRK-AS1	NOTCH1	hsa-miR-296-5p, hsa-miR-34a-5p, hsa-miR-34c-5p, hsa-miR-449a
SNRK-AS1	MYCN	hsa-miR-34a-5p, hsa-miR-34c-5p, hsa-miR-449a, hsa-miR-449b-5p
SNRK-AS1	MFN2	hsa-miR-106a-5p, hsa-miR-106b-5p, hsa-miR-17-5p
SNRK-AS1	IGF1R	hsa-miR-138-5p, hsa-miR-145-5p, hsa-miR-214-5p, hsa-miR-21-5p, hsa-miR-335-5p, hsa-miR-7-5p
SNRK-AS1	HIF1A	hsa-miR-106a-5p, hsa-miR-106b-5p, hsa-miR-138-5p, hsa-miR-17-5p, hsa-miR-199a-5p, hsa-miR-199b-5p, hsa-miR-20a-5p, hsa-miR-20b-5p
SNRK-AS1	E2F3	hsa-miR-106b-5p, hsa-miR-145-5p, hsa-miR-17-5p, hsa-miR-20a-5p, hsa-miR-34a-5p, hsa-miR-34c-5p, hsa-miR-449a
SNRK-AS1	CDK6	hsa-miR-145-5p, hsa-miR-214-5p, hsa-miR-34a-5p, hsa-miR-34c-5p, hsa-miR-449a, hsa-miR-449b-5p, hsa-miR-491-5p
SNRK-AS1	CDH2	hsa-miR-145-5p, hsa-miR-199a-5p, hsa-miR-34a-5p
SNRK-AS1	CCND2	hsa-miR-106b-5p, hsa-miR-17-5p, hsa-miR-20a-5p, hsa-miR-302d-3p
SNRK-AS1	BMPR2	hsa-miR-135a-5p, hsa-miR-135b-5p, hsa-miR-17-5p, hsa-miR-20a-5p, hsa-miR-21-5p
SNRK-AS1	BCL2L11	hsa-miR-106b-5p, hsa-miR-17-5p, hsa-miR-20a-5p, hsa-miR-488-3p
SNRK-AS1	BCL2	hsa-miR-135a-5p, hsa-miR-136-5p, hsa-miR-17-5p, hsa-miR-20a-5p, hsa-miR-21-5p, hsa-miR-34a-5p, hsa-miR-34c-5p, hsa-miR-449a, hsa-miR-7-5p
SNRK-AS1	APP	hsa-miR-106a-5p, hsa-miR-106b-5p, hsa-miR-17-5p, hsa-miR-20a-5p, hsa-miR-520c-3p
SNRK-AS1	APC	hsa-miR-106a-5p, hsa-miR-106b-5p, hsa-miR-135a-5p, hsa-miR-135b-5p
SNHG7	SIAH1	hsa-miR-107, hsa-miR-135a-5p, hsa-miR-424-5p
SNHG7	RNF2	hsa-miR-181a-5p, hsa-miR-181b-5p, hsa-miR-200b-3p, hsa-miR-200c-3p
SNHG7	RAD51	hsa-miR-103a-3p, hsa-miR-107, hsa-miR-193b-3p, hsa-miR-96-5p
SNHG7	HMGA1	hsa-let-7a-5p, hsa-let-7b-5p, hsa-miR-15a-5p, hsa-miR-16-5p, hsa-miR-195-5p, hsa-miR-296-5p
SNHG7	E2F2	hsa-let-7a-5p, hsa-let-7b-5p, hsa-miR-214-5p, hsa-miR-31-5p, hsa-miR-98-5p
SNHG7	AURKB	hsa-let-7a-5p, hsa-let-7e-5p, hsa-let-7i-5p
SNHG7	ZEB1	hsa-miR-130b-3p, hsa-miR-142-5p, hsa-miR-150-5p, hsa-miR-200b-3p, hsa-miR-200c-3p, hsa-miR-223-3p, hsa-miR-455-3p, hsa-miR-484, hsa-miR-96-5p
SNHG7	PRMT5	hsa-miR-25-3p, hsa-miR-92b-3p, hsa-miR-96-5p
SNHG7	PIN1	hsa-miR-200b-3p, hsa-miR-200c-3p, hsa-miR-296-5p, hsa-miR-874-3p
SNHG7	NOTCH1	hsa-miR-129-5p, hsa-miR-181a-5p, hsa-miR-200b-3p, hsa-miR-200c-3p, hsa-miR-27b-3p, hsa-miR-296-5p, hsa-miR-326, hsa-miR-9-5p
SNHG7	CDX2	hsa-miR-106a-5p, hsa-miR-181a-5p, hsa-miR-181b-5p, hsa-miR-181c-5p, hsa-miR-204-5p, hsa-miR-424-5p, hsa-miR-9-5p
SNHG7	BIRC5	hsa-miR-150-5p, hsa-miR-16-5p, hsa-miR-195-5p, hsa-miR-497-5p, hsa-miR-708-5p
SNHG6	E2F2	hsa-let-7a-5p, hsa-let-7b-5p, hsa-miR-26a-5p, hsa-miR-98-5p
SNHG6	AURKB	hsa-let-7a-5p, hsa-let-7e-5p, hsa-let-7i-5p
SNHG6	FOXO3	hsa-miR-223-3p, hsa-miR-23a-3p, hsa-miR-30c-5p, hsa-miR-93-5p
SNHG5	HMGA2	hsa-let-7d-5p, hsa-miR-106a-5p, hsa-miR-107, hsa-miR-154-5p, hsa-miR-23b-3p, hsa-miR-26a-5p, hsa-miR-485-5p, hsa-miR-98-5p
SNHG5	TCEAL1	hsa-miR-106b-5p, hsa-miR-17-5p, hsa-miR-20a-5p, hsa-miR-22-3p, hsa-miR-25-3p, hsa-miR-423-3p
SNHG5	RASSF1	hsa-miR-181a-5p, hsa-miR-181b-5p, hsa-miR-373-3p
SNHG5	PHB	hsa-miR-26a-5p, hsa-miR-27a-3p, hsa-miR-27b-3p
SNHG5	E2F5	hsa-miR-106b-5p, hsa-miR-154-5p, hsa-miR-181a-5p, hsa-miR-205-5p, hsa-miR-98-5p
SNHG3	CHUK	hsa-miR-15a-5p, hsa-miR-15b-5p, hsa-miR-16-5p, hsa-miR-195-5p, hsa-miR-98-5p
SNHG3	COPS6	hsa-let-7c-5p, hsa-let-7f-5p, hsa-let-7i-5p
SNHG3	MAPK14	hsa-miR-125a-5p, hsa-miR-125b-5p, hsa-miR-141-3p, hsa-miR-200a-3p, hsa-miR-24-3p
SNHG3	NRAS	hsa-let-7a-5p, hsa-let-7b-5p, hsa-let-7c-5p, hsa-miR-20a-5p, hsa-miR-98-5p
SNHG3	HMGA1	hsa-let-7a-5p, hsa-let-7b-5p, hsa-miR-125b-5p, hsa-miR-15a-5p, hsa-miR-16-5p, hsa-miR-185-5p, hsa-miR-195-5p, hsa-miR-196a-5p
SNHG3	CHEK1	hsa-miR-15a-5p, hsa-miR-15b-5p, hsa-miR-16-5p, hsa-miR-195-5p, hsa-miR-24-3p, hsa-miR-424-5p, hsa-miR-503-5p
SNHG3	CDKN2A	hsa-let-7g-5p, hsa-miR-10b-5p, hsa-miR-125b-5p, hsa-miR-24-3p
SNHG3	CCNE1	hsa-miR-15a-5p, hsa-miR-15b-5p, hsa-miR-16-5p, hsa-miR-195-5p, hsa-miR-30c-2-3p, hsa-miR-424-5p, hsa-miR-503-5p
SNHG3	EIF4EBP1	hsa-miR-125a-5p, hsa-miR-125b-5p, hsa-miR-138-5p
SNHG3	CASP3	hsa-let-7a-5p, hsa-let-7c-5p, hsa-let-7g-5p, hsa-miR-138-5p, hsa-miR-224-5p, hsa-miR-421, hsa-miR-98-5p
SNHG3	ATF6	hsa-miR-199a-5p, hsa-miR-424-5p, hsa-miR-503-5p
SNHG23	RET	hsa-miR-15a-5p, hsa-miR-195-5p, hsa-miR-218-5p, hsa-miR-27b-3p
SNHG23	RECK	hsa-miR-15a-5p, hsa-miR-15b-5p, hsa-miR-16-5p
SNHG23	DICER1	hsa-let-7a-5p, hsa-let-7d-5p, hsa-miR-195-5p, hsa-miR-497-5p, hsa-miR-9-5p
SNHG20	EGFR	hsa-miR-125a-5p, hsa-miR-125b-5p, hsa-miR-137, hsa-miR-7-1-3p, hsa-miR-7-5p
SNHG20	SIRT7	hsa-miR-125a-5p, hsa-miR-125b-5p, hsa-miR-34a-5p
SNHG20	HNF4A	hsa-miR-24-3p, hsa-miR-34a-5p, hsa-miR-449a
SNHG20	CREB5	hsa-miR-182-5p, hsa-miR-29c-3p, hsa-miR-449a
SNHG20	CDK6	hsa-miR-103a-3p, hsa-miR-107, hsa-miR-137, hsa-miR-29a-3p, hsa-miR-29b-3p, hsa-miR-29c-3p, hsa-miR-34a-5p, hsa-miR-449a
SNHG20	CCND2	hsa-miR-182-5p, hsa-miR-29a-3p, hsa-miR-29b-3p, hsa-miR-29c-3p
SNHG20	AKT2	hsa-miR-137, hsa-miR-29a-3p, hsa-miR-29b-3p, hsa-miR-29c-3p
SNHG17	MMP2	hsa-miR-125b-5p, hsa-miR-139-5p, hsa-miR-218-5p, hsa-miR-29a-3p, hsa-miR-29b-3p, hsa-miR-29c-3p, hsa-miR-338-3p, hsa-miR-708-5p
SNHG17	SMO	hsa-miR-125b-5p, hsa-miR-218-5p, hsa-miR-338-3p
SNHG17	GATA4	hsa-miR-200b-3p, hsa-miR-200c-3p, hsa-miR-26b-5p
SNHG17	GAPDH	hsa-miR-29a-3p, hsa-miR-29b-3p, hsa-miR-29c-3p
SNHG17	AKT1	hsa-miR-125a-5p, hsa-miR-125b-5p, hsa-miR-184, hsa-miR-185-3p, hsa-miR-19a-3p, hsa-miR-29b-3p, hsa-miR-708-5p
SNHG17	TDG	hsa-miR-26a-5p, hsa-miR-29a-3p, hsa-miR-29b-3p, hsa-miR-29c-3p
SNHG17	SNAI1	hsa-miR-204-5p, hsa-miR-26a-5p, hsa-miR-30a-5p, hsa-miR-30b-5p, hsa-miR-30c-5p, hsa-miR-30d-5p, hsa-miR-30e-5p
SNHG17	LOX	hsa-miR-200b-3p, hsa-miR-29a-3p, hsa-miR-29b-3p, hsa-miR-29c-3p, hsa-miR-30a-5p
SNHG17	IMPDH1	hsa-miR-19a-3p, hsa-miR-29a-3p, hsa-miR-29b-3p
SNHG17	HMGCR	hsa-miR-29a-3p, hsa-miR-29b-3p, hsa-miR-29c-3p
SNHG17	COL5A2	hsa-miR-29a-3p, hsa-miR-29b-3p, hsa-miR-29c-3p
SNHG17	ADAM12	hsa-miR-200b-3p, hsa-miR-200c-3p, hsa-miR-29a-3p, hsa-miR-29b-3p, hsa-miR-29c-3p, hsa-miR-30d-3p
SNHG17	UBE2I	hsa-miR-200c-3p, hsa-miR-30c-5p, hsa-miR-30e-5p
SNHG17	SOCS1	hsa-miR-19a-3p, hsa-miR-19b-3p, hsa-miR-30b-5p, hsa-miR-30d-5p
SNHG17	SERPINH1	hsa-miR-29a-3p, hsa-miR-29b-3p, hsa-miR-29c-3p
SNHG17	RAP1B	hsa-miR-101-3p, hsa-miR-139-5p, hsa-miR-28-5p
SNHG17	PIN1	hsa-miR-140-5p, hsa-miR-200b-3p, hsa-miR-200c-3p, hsa-miR-296-5p
SNHG17	LAMC1	hsa-miR-140-5p, hsa-miR-29b-3p, hsa-miR-29c-3p
SNHG17	EZH2	hsa-miR-101-3p, hsa-miR-144-3p, hsa-miR-200b-3p, hsa-miR-26a-5p, hsa-miR-26b-5p, hsa-miR-30d-5p, hsa-miR-429, hsa-miR-708-5p
SNHG17	DNMT3B	hsa-miR-200b-3p, hsa-miR-200c-3p, hsa-miR-26a-5p, hsa-miR-29a-3p, hsa-miR-29b-3p, hsa-miR-29c-3p
SNHG17	COL4A2	hsa-miR-29a-3p, hsa-miR-29b-3p, hsa-miR-29c-3p
SNHG17	COL4A1	hsa-miR-29a-3p, hsa-miR-29b-3p, hsa-miR-29c-3p
SNHG17	CDK6	hsa-miR-218-5p, hsa-miR-26a-5p, hsa-miR-26b-5p, hsa-miR-29a-3p, hsa-miR-29b-3p, hsa-miR-29c-3p, hsa-miR-30a-3p, hsa-miR-378a-3p
SNHG17	CASP3	hsa-miR-101-3p, hsa-miR-30c-5p, hsa-miR-30d-5p, hsa-miR-30e-5p, hsa-miR-582-5p
SNHG17	BAK1	hsa-miR-125a-5p, hsa-miR-125b-5p, hsa-miR-193a-3p
SNHG17	ATG12	hsa-miR-200b-3p, hsa-miR-30b-5p, hsa-miR-30d-5p
SNHG17	AKT2	hsa-miR-184, hsa-miR-29a-3p, hsa-miR-29b-3p, hsa-miR-29c-3p, hsa-miR-708-5p
SNHG14	PTEN	hsa-miR-103a-3p, hsa-miR-107, hsa-miR-130a-3p, hsa-miR-130b-3p, hsa-miR-17-5p, hsa-miR-181a-5p, hsa-miR-18a-5p, hsa-miR-193a-3p, hsa-miR-19a-3p, hsa-miR-19b-3p, hsa-miR-20b-5p, hsa-miR-21-3p, hsa-miR-221-3p, hsa-miR-22-3p, hsa-miR-23a-3p, hsa-miR-23b-3p, hsa-miR-25-3p, hsa-miR-26a-5p, hsa-miR-29a-3p, hsa-miR-29b-3p, hsa-miR-29c-3p, hsa-miR-301a-3p, hsa-miR-320a, hsa-miR-377-3p, hsa-miR-382-5p, hs…
SNHG14	BMP7	hsa-miR-137, hsa-miR-22-3p, hsa-miR-34a-5p
SNHG14	PPARGC1A	hsa-miR-130a-3p, hsa-miR-130b-3p, hsa-miR-23a-3p, hsa-miR-485-3p, hsa-miR-485-5p
SNHG14	IRS2	hsa-let-7b-5p, hsa-miR-135a-5p, hsa-miR-145-5p, hsa-miR-338-3p, hsa-miR-33a-5p, hsa-miR-7-5p
SNHG14	ZBTB4	hsa-miR-130b-3p, hsa-miR-17-5p, hsa-miR-19a-3p, hsa-miR-93-5p
SNHG14	TP53INP1	hsa-miR-125b-5p, hsa-miR-130b-3p, hsa-miR-17-5p, hsa-miR-19a-3p, hsa-miR-93-5p
SNHG14	TET2	hsa-miR-101-3p, hsa-miR-125b-5p, hsa-miR-22-3p, hsa-miR-26a-5p, hsa-miR-29a-3p, hsa-miR-29b-3p, hsa-miR-29c-3p, hsa-miR-7-5p
SNHG14	SPRED1	hsa-miR-126-5p, hsa-miR-132-3p, hsa-miR-1-3p
SNHG14	SLC6A4	hsa-miR-135a-5p, hsa-miR-16-5p, hsa-miR-24-3p
SNHG14	ROCK2	hsa-miR-124-3p, hsa-miR-135a-5p, hsa-miR-138-5p, hsa-miR-139-5p
SNHG14	ROCK1	hsa-miR-124-3p, hsa-miR-130a-3p, hsa-miR-135a-5p, hsa-miR-145-5p, hsa-miR-148a-3p, hsa-miR-148b-3p
SNHG14	RECK	hsa-miR-135b-5p, hsa-miR-15a-5p, hsa-miR-15b-5p, hsa-miR-16-5p, hsa-miR-221-3p, hsa-miR-25-3p, hsa-miR-374b-5p, hsa-miR-409-3p
SNHG14	RAF1	hsa-miR-125a-5p, hsa-miR-125b-5p, hsa-miR-132-3p, hsa-miR-139-5p, hsa-miR-16-5p, hsa-miR-195-5p, hsa-miR-7-1-3p, hsa-miR-7-5p
SNHG14	PTK2	hsa-miR-135a-5p, hsa-miR-138-5p, hsa-miR-193a-3p, hsa-miR-7-5p
SNHG14	PRKAA1	hsa-miR-137, hsa-miR-19b-3p, hsa-miR-33a-5p, hsa-miR-9-5p
SNHG14	PHLPP1	hsa-miR-15a-5p, hsa-miR-17-5p, hsa-miR-18a-5p, hsa-miR-19a-3p, hsa-miR-224-5p, hsa-miR-375
SNHG14	NTRK3	hsa-miR-125a-5p, hsa-miR-125b-5p, hsa-miR-148a-3p, hsa-miR-185-5p, hsa-miR-22-3p, hsa-miR-485-3p, hsa-miR-625-5p, hsa-miR-9-5p
SNHG14	NCOR2	hsa-miR-125b-5p, hsa-miR-16-5p, hsa-miR-30c-5p, hsa-miR-34a-3p
SNHG14	NCOA3	hsa-miR-137, hsa-miR-17-5p, hsa-miR-18a-5p, hsa-miR-19b-3p, hsa-miR-29b-3p, hsa-miR-33a-5p
SNHG14	MTDH	hsa-miR-124-3p, hsa-miR-137, hsa-miR-145-5p, hsa-miR-22-3p, hsa-miR-26a-5p, hsa-miR-320a, hsa-miR-375
SNHG14	MEF2D	hsa-miR-103a-3p, hsa-miR-17-5p, hsa-miR-18a-5p, hsa-miR-19a-3p
SNHG14	MAPK1	hsa-let-7a-5p, hsa-let-7b-5p, hsa-miR-126-5p, hsa-miR-132-3p, hsa-miR-17-5p, hsa-miR-181a-5p, hsa-miR-320a, hsa-miR-377-3p, hsa-miR-9-3p
SNHG14	KAT2B	hsa-miR-17-5p, hsa-miR-181a-5p, hsa-miR-19a-3p, hsa-miR-19b-3p, hsa-miR-25-3p, hsa-miR-93-5p
SNHG14	HDAC4	hsa-miR-125a-5p, hsa-miR-1-3p, hsa-miR-22-3p, hsa-miR-29b-3p, hsa-miR-30c-5p, hsa-miR-9-5p
SNHG14	DNMT3A	hsa-miR-101-3p, hsa-miR-143-3p, hsa-miR-29a-3p, hsa-miR-29b-3p, hsa-miR-29c-3p
SNHG14	CTNND1	hsa-miR-145-5p, hsa-miR-29c-3p, hsa-miR-409-3p
SNHG14	CPEB4	hsa-let-7b-5p, hsa-miR-145-5p, hsa-miR-26a-5p, hsa-miR-29a-3p
SNHG14	CLOCK	hsa-miR-107, hsa-miR-124-3p, hsa-miR-17-5p
SNHG14	CLIP1	hsa-miR-17-5p, hsa-miR-18a-5p, hsa-miR-19a-3p, hsa-miR-19b-3p, hsa-miR-25-3p, hsa-miR-93-5p
SNHG14	CDH2	hsa-miR-124-3p, hsa-miR-145-5p, hsa-miR-218-5p, hsa-miR-338-3p, hsa-miR-34a-5p
SNHG14	CDC42	hsa-miR-107, hsa-miR-137, hsa-miR-185-5p, hsa-miR-195-5p, hsa-miR-224-5p, hsa-miR-29a-3p, hsa-miR-29b-3p, hsa-miR-29c-3p, hsa-miR-30c-5p
SNHG14	BMPR2	hsa-miR-135a-5p, hsa-miR-135b-5p, hsa-miR-17-5p, hsa-miR-19a-3p, hsa-miR-19b-3p
SNHG14	BCL9	hsa-miR-218-5p, hsa-miR-30b-5p, hsa-miR-30c-2-3p, hsa-miR-30c-5p
SNHG14	BCL2	hsa-miR-125a-5p, hsa-miR-125b-5p, hsa-miR-135a-5p, hsa-miR-139-5p, hsa-miR-143-3p, hsa-miR-148a-3p, hsa-miR-15a-5p, hsa-miR-15b-5p, hsa-miR-16-5p, hsa-miR-17-5p, hsa-miR-181a-5p, hsa-miR-18a-5p, hsa-miR-193a-3p, hsa-miR-195-5p, hsa-miR-224-5p, hsa-miR-29a-3p, hsa-miR-29b-3p, hsa-miR-29c-3p, hsa-miR-30b-5p, hsa-miR-33b-5p, hsa-miR-34a-3p, hsa-miR-34a-5p, hsa-miR-365a-3p, hsa-miR-7-5p, hsa-miR-9-5p
SNHG14	ATM	hsa-miR-101-3p, hsa-miR-181a-5p, hsa-miR-18a-5p, hsa-miR-26a-5p, hsa-miR-374a-5p
SNHG14	APP	hsa-let-7a-5p, hsa-let-7d-5p, hsa-miR-101-3p, hsa-miR-130a-3p, hsa-miR-15a-5p, hsa-miR-16-5p, hsa-miR-17-5p
SNHG12	PBX3	hsa-miR-181a-5p, hsa-miR-181b-5p, hsa-miR-320a, hsa-miR-33a-3p, hsa-miR-495-3p, hsa-miR-497-5p, hsa-miR-98-5p
SNHG12	WEE1	hsa-miR-15a-5p, hsa-miR-15b-5p, hsa-miR-16-5p, hsa-miR-195-5p, hsa-miR-221-3p, hsa-miR-424-5p, hsa-miR-497-5p, hsa-miR-503-5p
SNHG12	PTGS2	hsa-miR-137, hsa-miR-146a-5p, hsa-miR-16-5p, hsa-miR-199a-3p, hsa-miR-199a-5p
SNHG12	PIM1	hsa-miR-16-5p, hsa-miR-192-5p, hsa-miR-214-3p, hsa-miR-33a-5p, hsa-miR-33b-5p, hsa-miR-542-3p
SNHG12	IL6	hsa-let-7a-5p, hsa-let-7c-5p, hsa-let-7f-5p, hsa-miR-107, hsa-miR-146a-5p, hsa-miR-146b-5p, hsa-miR-223-3p, hsa-miR-451a, hsa-miR-98-5p
SNHG12	SOCS3	hsa-let-7f-5p, hsa-miR-15b-5p, hsa-miR-16-5p, hsa-miR-221-3p
SNHG12	NRAS	hsa-let-7a-5p, hsa-let-7b-5p, hsa-let-7c-5p, hsa-miR-181a-5p, hsa-miR-214-3p, hsa-miR-98-5p
SNHG12	MYC	hsa-let-7a-5p, hsa-let-7c-5p, hsa-let-7g-5p, hsa-miR-129-2-3p, hsa-miR-135a-5p, hsa-miR-135b-5p, hsa-miR-185-5p, hsa-miR-21-5p, hsa-miR-320a, hsa-miR-320b, hsa-miR-33a-5p, hsa-miR-33b-5p, hsa-miR-34a-5p, hsa-miR-34b-5p, hsa-miR-34c-5p, hsa-miR-377-3p, hsa-miR-429, hsa-miR-449a, hsa-miR-451a, hsa-miR-494-3p, hsa-miR-744-5p, hsa-miR-92a-3p, hsa-miR-98-5p
SNHG12	LIF	hsa-miR-199a-5p, hsa-miR-223-3p, hsa-miR-346
SNHG12	ITGB3	hsa-let-7a-5p, hsa-let-7c-5p, hsa-miR-192-5p, hsa-miR-320a, hsa-miR-338-3p, hsa-miR-98-5p
SNHG12	FOSL1	hsa-miR-138-5p, hsa-miR-200a-3p, hsa-miR-33a-5p, hsa-miR-34a-5p, hsa-miR-34c-5p
SNHG12	DUSP1	hsa-miR-146a-5p, hsa-miR-200c-3p, hsa-miR-940
SNHG12	CXCR4	hsa-miR-139-5p, hsa-miR-146a-3p, hsa-miR-146a-5p, hsa-miR-150-5p, hsa-miR-224-5p, hsa-miR-494-3p
SNHG12	CXCL2	hsa-miR-141-3p, hsa-miR-192-5p, hsa-miR-200a-3p, hsa-miR-217, hsa-miR-223-3p, hsa-miR-532-5p
SNHG12	ACTA2	hsa-miR-135a-5p, hsa-miR-199a-5p, hsa-miR-34a-5p
SNHG12	VEGFA	hsa-miR-107, hsa-miR-141-3p, hsa-miR-146a-5p, hsa-miR-150-5p, hsa-miR-15a-5p, hsa-miR-15b-5p, hsa-miR-16-5p, hsa-miR-181a-5p, hsa-miR-185-5p, hsa-miR-186-5p, hsa-miR-195-5p, hsa-miR-199a-3p, hsa-miR-199a-5p, hsa-miR-200b-3p, hsa-miR-200c-3p, hsa-miR-21-5p, hsa-miR-223-3p, hsa-miR-23b-3p, hsa-miR-320a, hsa-miR-326, hsa-miR-34a-5p, hsa-miR-361-5p, hsa-miR-429, hsa-miR-503-5p
SNHG12	RAP1B	hsa-miR-139-5p, hsa-miR-181a-5p, hsa-miR-181b-5p, hsa-miR-181c-5p, hsa-miR-181d-5p
SNHG12	RAB23	hsa-miR-200b-3p, hsa-miR-367-3p, hsa-miR-92b-3p
SNHG12	PLAU	hsa-miR-181a-5p, hsa-miR-193a-3p, hsa-miR-193b-3p, hsa-miR-23b-3p
SNHG12	IKBKB	hsa-miR-199a-5p, hsa-miR-200b-3p, hsa-miR-200c-3p, hsa-miR-218-5p, hsa-miR-451a, hsa-miR-497-5p, hsa-miR-503-5p
SNHG12	GNPDA1	hsa-let-7b-5p, hsa-miR-181b-5p, hsa-miR-196a-5p
SNHG12	FAS	hsa-miR-146a-5p, hsa-miR-196b-5p, hsa-miR-23a-3p, hsa-miR-320a
SNHG12	EFNA1	hsa-miR-138-5p, hsa-miR-200c-3p, hsa-miR-218-5p
SNHG12	COPS8	hsa-let-7c-5p, hsa-let-7f-5p, hsa-let-7i-5p, hsa-miR-146a-5p
SLC37A4	MMP2	hsa-miR-223-3p, hsa-miR-29a-3p, hsa-miR-29b-3p, hsa-miR-29c-3p, hsa-miR-451a
SLC37A4	GAPDH	hsa-miR-29a-3p, hsa-miR-29b-3p, hsa-miR-29c-3p
SLC37A4	PER1	hsa-miR-29a-3p, hsa-miR-29b-3p, hsa-miR-29c-3p
SLC37A4	FOXO1	hsa-miR-107, hsa-miR-135a-5p, hsa-miR-135b-5p, hsa-miR-223-3p, hsa-miR-27a-3p, hsa-miR-27b-3p, hsa-miR-370-3p
SLC37A4	COL5A2	hsa-miR-29a-3p, hsa-miR-29b-3p, hsa-miR-29c-3p
SLC37A4	CDK2	hsa-miR-103a-3p, hsa-miR-135a-5p, hsa-miR-223-3p, hsa-miR-29a-3p
SLC37A4	BACE1	hsa-miR-107, hsa-miR-29a-3p, hsa-miR-29b-3p, hsa-miR-29c-3p
SLC37A4	ADAM12	hsa-miR-29a-3p, hsa-miR-29b-3p, hsa-miR-29c-3p
SLC37A4	TET2	hsa-miR-29a-3p, hsa-miR-29b-3p, hsa-miR-29c-3p
SLC37A4	SP1	hsa-miR-223-3p, hsa-miR-27a-3p, hsa-miR-29b-3p, hsa-miR-29c-3p, hsa-miR-335-5p
SLC37A4	PDGFRB	hsa-miR-29a-3p, hsa-miR-29b-3p, hsa-miR-29c-3p
SLC37A4	NASP	hsa-miR-29a-3p, hsa-miR-29b-3p, hsa-miR-29c-3p
SLC37A4	MAPK1	hsa-miR-320a, hsa-miR-335-5p, hsa-miR-378a-3p, hsa-miR-451a
SLC37A4	LAMC2	hsa-miR-146a-5p, hsa-miR-29a-3p, hsa-miR-29b-3p, hsa-miR-29c-3p
SLC37A4	ITGB1	hsa-miR-29a-3p, hsa-miR-29b-3p, hsa-miR-29c-3p
SLC37A4	IGF1R	hsa-miR-185-5p, hsa-miR-223-3p, hsa-miR-320a, hsa-miR-335-5p, hsa-miR-378a-3p, hsa-miR-494-3p
SLC37A4	FBN1	hsa-miR-29a-3p, hsa-miR-29b-3p, hsa-miR-29c-3p
SLC37A4	DNMT3B	hsa-miR-29a-3p, hsa-miR-29b-3p, hsa-miR-29c-3p
SLC37A4	DNMT3A	hsa-miR-29a-3p, hsa-miR-29b-3p, hsa-miR-29c-3p
SLC37A4	DICER1	hsa-miR-103a-3p, hsa-miR-107, hsa-miR-195-5p, hsa-miR-29a-3p
SLC37A4	COL4A2	hsa-miR-29a-3p, hsa-miR-29b-3p, hsa-miR-29c-3p
SLC37A4	COL4A1	hsa-miR-29a-3p, hsa-miR-29b-3p, hsa-miR-29c-3p
SLC37A4	CCND2	hsa-miR-146a-5p, hsa-miR-29a-3p, hsa-miR-29b-3p, hsa-miR-29c-3p
SLC26A4-AS1	PURA	hsa-miR-15a-5p, hsa-miR-15b-5p, hsa-miR-16-5p
SLC26A4-AS1	PAK1	hsa-let-7a-5p, hsa-miR-221-3p, hsa-miR-30c-5p
SLC26A4-AS1	MAPK1	hsa-let-7a-5p, hsa-let-7b-5p, hsa-miR-28-5p, hsa-miR-320a
SLC26A4-AS1	KRAS	hsa-let-7a-5p, hsa-let-7f-5p, hsa-let-7g-5p, hsa-miR-16-5p
SLC26A4-AS1	AXIN2	hsa-miR-107, hsa-miR-15b-5p, hsa-miR-16-5p
SH3BP5-AS1	TAB3	hsa-miR-15a-5p, hsa-miR-15b-5p, hsa-miR-16-5p, hsa-miR-195-5p
SH3BP5-AS1	RECK	hsa-miR-15a-5p, hsa-miR-15b-5p, hsa-miR-16-5p
SH3BP5-AS1	IGF1R	hsa-let-7a-5p, hsa-let-7b-5p, hsa-let-7e-5p, hsa-miR-16-5p
SH3BP5-AS1	BCL2	hsa-miR-15a-5p, hsa-miR-15b-5p, hsa-miR-16-5p, hsa-miR-195-5p
SH3BP5-AS1	AKT3	hsa-miR-15a-5p, hsa-miR-15b-5p, hsa-miR-16-5p
SBF2-AS1	RAP1B	hsa-miR-181a-5p, hsa-miR-28-5p, hsa-miR-518b
SATB1-AS1	KRAS	hsa-let-7a-5p, hsa-let-7f-5p, hsa-let-7g-5p, hsa-miR-143-3p
RPPH1	PKNOX1	hsa-miR-17-5p, hsa-miR-19a-3p, hsa-miR-20a-5p
RPPH1	CDKN2A	hsa-let-7g-5p, hsa-miR-10b-5p, hsa-miR-125b-5p
RPPH1	PRMT5	hsa-miR-19a-3p, hsa-miR-25-3p, hsa-miR-32-5p, hsa-miR-92b-3p
RPPH1	FGG	hsa-miR-29a-3p, hsa-miR-29b-3p, hsa-miR-29c-3p
RPPH1	AKT3	hsa-miR-122-5p, hsa-miR-20b-5p, hsa-miR-29a-3p, hsa-miR-29b-3p, hsa-miR-29c-3p, hsa-miR-519d-3p
RPPH1	AKT2	hsa-let-7b-5p, hsa-let-7g-5p, hsa-miR-137, hsa-miR-29a-3p, hsa-miR-29b-3p, hsa-miR-29c-3p
RP5-991G20.1	CCND1	hsa-miR-138-5p, hsa-miR-15a-5p, hsa-miR-15b-5p, hsa-miR-16-5p, hsa-miR-195-5p, hsa-miR-424-5p, hsa-miR-497-5p
RP5-991G20.1	MYB	hsa-miR-15a-5p, hsa-miR-16-5p, hsa-miR-195-5p, hsa-miR-424-5p
RP5-991G20.1	HMGA1	hsa-miR-15a-5p, hsa-miR-16-5p, hsa-miR-195-5p
RP5-991G20.1	CHEK1	hsa-miR-15a-5p, hsa-miR-15b-5p, hsa-miR-16-5p, hsa-miR-195-5p, hsa-miR-424-5p, hsa-miR-497-5p
RP5-991G20.1	CDC25A	hsa-miR-15a-5p, hsa-miR-195-5p, hsa-miR-424-5p, hsa-miR-497-5p
RP5-991G20.1	CCNE1	hsa-miR-15a-5p, hsa-miR-15b-5p, hsa-miR-16-5p, hsa-miR-195-5p, hsa-miR-424-5p, hsa-miR-497-5p
RP5-991G20.1	ZEB2	hsa-miR-138-5p, hsa-miR-205-5p, hsa-miR-4782-3p
RP5-991G20.1	TAB3	hsa-miR-15a-5p, hsa-miR-15b-5p, hsa-miR-16-5p, hsa-miR-195-5p, hsa-miR-497-5p
RP5-991G20.1	RPS6KB1	hsa-miR-16-5p, hsa-miR-195-5p, hsa-miR-382-5p, hsa-miR-497-5p
RP5-991G20.1	RAF1	hsa-miR-16-5p, hsa-miR-195-5p, hsa-miR-497-5p
RP5-991G20.1	CCND2	hsa-miR-15a-5p, hsa-miR-16-5p, hsa-miR-191-5p
RP5-991G20.1	BIRC5	hsa-miR-16-5p, hsa-miR-195-5p, hsa-miR-497-5p
RP5-991G20.1	AKT3	hsa-miR-15a-5p, hsa-miR-15b-5p, hsa-miR-16-5p
RP5-1186N24.3	STK11	hsa-miR-199a-3p, hsa-miR-451a, hsa-miR-93-5p
RP5-1142A6.9	IGF1R	hsa-let-7a-5p, hsa-let-7b-5p, hsa-let-7c-5p, hsa-let-7e-5p, hsa-miR-4458
RP5-1142A6.9	DICER1	hsa-let-7a-5p, hsa-let-7c-5p, hsa-let-7d-5p
RP5-1142A6.2	RHOC	hsa-miR-302b-3p, hsa-miR-372-3p, hsa-miR-93-5p
RP5-1142A6.2	FOXO3	hsa-miR-182-5p, hsa-miR-93-5p, hsa-miR-96-5p
RP5-1142A6.2	CD44	hsa-miR-373-3p, hsa-miR-520a-3p, hsa-miR-520c-3p
RP5-1112D6.4	RECK	hsa-miR-135b-5p, hsa-miR-15a-5p, hsa-miR-15b-5p, hsa-miR-16-5p
RP5-1112D6.4	PRDM1	hsa-let-7a-5p, hsa-let-7b-5p, hsa-let-7f-5p, hsa-miR-101-3p
RP5-1112D6.4	PLAG1	hsa-miR-107, hsa-miR-144-3p, hsa-miR-27a-3p, hsa-miR-424-5p
RP5-1112D6.4	MTOR	hsa-let-7c-5p, hsa-miR-101-3p, hsa-miR-144-3p, hsa-miR-16-5p, hsa-miR-196b-5p, hsa-miR-497-5p
RP5-1112D6.4	HIF1A	hsa-miR-107, hsa-miR-23b-3p, hsa-miR-27a-3p, hsa-miR-424-5p, hsa-miR-497-3p
RP5-1112D6.4	DICER1	hsa-let-7a-5p, hsa-let-7c-5p, hsa-let-7d-5p, hsa-miR-103a-3p, hsa-miR-107, hsa-miR-195-5p, hsa-miR-497-5p
RP5-1112D6.4	CTNNB1	hsa-miR-101-3p, hsa-miR-124-3p, hsa-miR-200a-5p, hsa-miR-23b-3p, hsa-miR-34a-3p, hsa-miR-34c-3p, hsa-miR-92a-3p
RP5-1112D6.4	CREB1	hsa-miR-103a-3p, hsa-miR-27a-3p, hsa-miR-27b-3p, hsa-miR-34b-3p, hsa-miR-582-5p
RP5-1112D6.4	ACTB	hsa-miR-15a-5p, hsa-miR-15b-5p, hsa-miR-16-5p, hsa-miR-28-5p, hsa-miR-497-5p
RP5-1061H20.4	NOTCH2	hsa-miR-107, hsa-miR-23b-3p, hsa-miR-9-3p
RP4-781K5.2	RUNX3	hsa-miR-106a-5p, hsa-miR-106b-5p, hsa-miR-148a-3p, hsa-miR-20a-5p
RP4-781K5.2	WNT1	hsa-miR-148a-3p, hsa-miR-148b-3p, hsa-miR-152-3p
RP4-773N10.4	SOX4	hsa-miR-132-3p, hsa-miR-138-5p, hsa-miR-212-3p, hsa-miR-338-3p
RP4-773N10.4	SMAD2	hsa-let-7g-5p, hsa-miR-132-3p, hsa-miR-212-3p, hsa-miR-27a-3p, hsa-miR-27b-3p
RP4-773N10.4	SIRT1	hsa-miR-132-3p, hsa-miR-138-5p, hsa-miR-22-3p, hsa-miR-34a-5p, hsa-miR-449a
RP4-773N10.4	PDGFRB	hsa-miR-24-3p, hsa-miR-30b-5p, hsa-miR-34a-5p, hsa-miR-449a
RP4-773N10.4	NOTCH1	hsa-miR-24-3p, hsa-miR-27b-3p, hsa-miR-30b-5p, hsa-miR-30c-5p, hsa-miR-30d-5p, hsa-miR-30e-5p, hsa-miR-34a-5p, hsa-miR-449a
RP4-773N10.4	HIF1A	hsa-miR-138-5p, hsa-miR-186-5p, hsa-miR-22-3p, hsa-miR-27a-3p, hsa-miR-338-3p
RP4-773N10.4	HDAC4	hsa-miR-1-3p, hsa-miR-22-3p, hsa-miR-30c-5p
RP4-773N10.4	BCL9	hsa-miR-30b-5p, hsa-miR-30c-2-3p, hsa-miR-30c-5p, hsa-miR-30d-5p
RP4-647C14.3	RBFOX2	hsa-miR-22-3p, hsa-miR-320b, hsa-miR-320d
RP4-647C14.3	NOTCH1	hsa-miR-30b-5p, hsa-miR-30c-5p, hsa-miR-30d-5p, hsa-miR-30e-5p
RP4-647C14.3	BCL9	hsa-miR-30b-5p, hsa-miR-30c-5p, hsa-miR-30d-5p
RP4-614O4.11	AKT1	hsa-miR-125a-5p, hsa-miR-125b-5p, hsa-miR-138-5p, hsa-miR-199a-3p
RP4-614O4.11	TNFAIP3	hsa-miR-125a-5p, hsa-miR-125b-5p, hsa-miR-21-5p
RP4-614O4.11	TAB3	hsa-miR-195-5p, hsa-miR-199a-3p, hsa-miR-497-5p
RP4-614O4.11	STAT3	hsa-miR-124-3p, hsa-miR-125a-5p, hsa-miR-125b-5p, hsa-miR-21-5p
RP4-614O4.11	CDK6	hsa-miR-124-3p, hsa-miR-129-2-3p, hsa-miR-195-5p, hsa-miR-497-5p
RP4-614O4.11	BCL2L2	hsa-miR-125b-5p, hsa-miR-129-2-3p, hsa-miR-195-5p
RP4-614O4.11	BCL2	hsa-miR-125a-5p, hsa-miR-125b-5p, hsa-miR-195-5p, hsa-miR-21-5p, hsa-miR-497-5p
RP4-601P9.1	RPS6KB1	hsa-miR-16-5p, hsa-miR-195-5p, hsa-miR-497-5p
RP4-601P9.1	DICER1	hsa-miR-103a-3p, hsa-miR-107, hsa-miR-195-5p, hsa-miR-497-5p
RP4-561L24.3	MAPK1	hsa-let-7a-5p, hsa-let-7b-5p, hsa-miR-320a, hsa-miR-451a
RP4-561L24.3	KRAS	hsa-let-7a-5p, hsa-let-7f-5p, hsa-let-7g-5p, hsa-miR-18a-3p, hsa-miR-365a-3p
RP4-555D20.2	MYC	hsa-miR-126-5p, hsa-miR-185-5p, hsa-miR-33a-5p, hsa-miR-33b-5p
RP3-486I3.7	E2F1	hsa-miR-181b-5p, hsa-miR-182-5p, hsa-miR-330-3p
RP3-486I3.7	SMAD4	hsa-miR-182-5p, hsa-miR-199a-5p, hsa-miR-421
RP3-486I3.7	SETD2	hsa-miR-186-5p, hsa-miR-199a-5p, hsa-miR-199b-5p
RP3-405J10.3	TAB3	hsa-miR-15a-5p, hsa-miR-15b-5p, hsa-miR-16-5p, hsa-miR-195-5p, hsa-miR-497-5p
RP3-405J10.3	RPS6KB1	hsa-miR-16-5p, hsa-miR-195-5p, hsa-miR-497-5p
RP3-405J10.3	CDK6	hsa-miR-103a-3p, hsa-miR-107, hsa-miR-16-5p, hsa-miR-195-5p, hsa-miR-424-5p, hsa-miR-497-5p
RP3-325F22.3	CLIC4	hsa-miR-106b-5p, hsa-miR-17-5p, hsa-miR-20a-5p, hsa-miR-93-5p
RP3-325F22.3	AKT1	hsa-miR-17-5p, hsa-miR-302a-3p, hsa-miR-302b-3p, hsa-miR-302d-3p
RP3-325F22.3	LATS2	hsa-miR-372-3p, hsa-miR-373-3p, hsa-miR-93-5p
RP3-325F22.3	ZBTB4	hsa-miR-106b-5p, hsa-miR-130b-3p, hsa-miR-17-5p, hsa-miR-93-5p
RP3-325F22.3	STAT3	hsa-miR-106a-5p, hsa-miR-106b-5p, hsa-miR-130b-3p, hsa-miR-17-5p, hsa-miR-20a-5p, hsa-miR-20b-5p, hsa-miR-519d-3p, hsa-miR-520c-3p
RP3-325F22.3	MFN2	hsa-miR-106a-5p, hsa-miR-106b-5p, hsa-miR-17-5p
RP3-325F22.3	JAK1	hsa-miR-106b-5p, hsa-miR-17-5p, hsa-miR-373-3p
RP3-325F22.3	HIF1A	hsa-miR-106a-5p, hsa-miR-106b-5p, hsa-miR-17-5p, hsa-miR-20a-5p, hsa-miR-20b-5p
RP3-325F22.3	DNMT1	hsa-miR-17-5p, hsa-miR-20a-5p, hsa-miR-301b-3p
RP3-325F22.3	CLIP1	hsa-miR-106b-5p, hsa-miR-17-5p, hsa-miR-20a-5p, hsa-miR-93-5p
RP3-325F22.3	APP	hsa-miR-106a-5p, hsa-miR-106b-5p, hsa-miR-130a-3p, hsa-miR-17-5p, hsa-miR-20a-5p, hsa-miR-520c-3p
RP1-86D1.5	COPS8	hsa-let-7c-5p, hsa-let-7f-5p, hsa-let-7i-5p
RP1-59D14.5	PER1	hsa-miR-29a-3p, hsa-miR-29b-3p, hsa-miR-29c-3p
RP1-59D14.5	PPP1R13B	hsa-miR-29a-3p, hsa-miR-29b-3p, hsa-miR-29c-3p
RP1-59D14.5	NASP	hsa-miR-29a-3p, hsa-miR-29b-3p, hsa-miR-29c-3p
RP13-638C3.4	ACVR2B	hsa-miR-192-5p, hsa-miR-194-5p, hsa-miR-215-5p
RP13-516M14.1	PER1	hsa-miR-29a-3p, hsa-miR-29b-3p, hsa-miR-29c-3p
RP13-516M14.1	FOXO1	hsa-miR-182-5p, hsa-miR-186-5p, hsa-miR-339-3p, hsa-miR-486-5p, hsa-miR-96-5p
RP13-516M14.1	VEGFA	hsa-miR-186-5p, hsa-miR-199a-5p, hsa-miR-29a-3p, hsa-miR-29b-3p, hsa-miR-29c-3p, hsa-miR-374b-5p, hsa-miR-378a-3p
RP13-516M14.1	TET2	hsa-miR-29a-3p, hsa-miR-29b-3p, hsa-miR-29c-3p
RP13-516M14.1	SETD2	hsa-miR-186-5p, hsa-miR-199a-5p, hsa-miR-199b-5p
RP13-516M14.1	NASP	hsa-miR-29a-3p, hsa-miR-29b-3p, hsa-miR-29c-3p
RP13-516M14.1	MCL1	hsa-miR-29a-3p, hsa-miR-29b-3p, hsa-miR-29c-3p, hsa-miR-339-3p, hsa-miR-876-3p
RP13-516M14.1	DNMT3A	hsa-miR-29a-3p, hsa-miR-29b-3p, hsa-miR-29c-3p
RP1-257A7.4	SIRT1	hsa-miR-181a-5p, hsa-miR-181b-5p, hsa-miR-181c-5p, hsa-miR-543
RP1-257A7.4	BCL2	hsa-miR-181a-5p, hsa-miR-181b-5p, hsa-miR-181c-5p
RP1-239B22.5	NLK	hsa-miR-101-3p, hsa-miR-181a-5p, hsa-miR-181b-5p, hsa-miR-181c-5p
RP1-239B22.5	ZEB2	hsa-miR-101-3p, hsa-miR-141-3p, hsa-miR-144-3p, hsa-miR-200a-3p, hsa-miR-221-3p, hsa-miR-590-3p
RP1-239B22.5	ZEB1	hsa-miR-101-3p, hsa-miR-141-3p, hsa-miR-144-3p, hsa-miR-150-5p, hsa-miR-200a-3p, hsa-miR-484, hsa-miR-539-5p, hsa-miR-590-3p
RP1-239B22.5	XIAP	hsa-miR-181a-5p, hsa-miR-181b-5p, hsa-miR-186-5p, hsa-miR-7-5p
RP1-239B22.5	SRF	hsa-miR-101-3p, hsa-miR-1-3p, hsa-miR-200a-3p
RP1-239B22.5	SMAD2	hsa-miR-145-5p, hsa-miR-200a-3p, hsa-miR-206, hsa-miR-27a-3p, hsa-miR-27b-3p, hsa-miR-484
RP1-239B22.5	SIRT1	hsa-miR-124-3p, hsa-miR-181a-5p, hsa-miR-181b-5p, hsa-miR-181c-5p, hsa-miR-221-3p
RP1-239B22.5	PIK3CA	hsa-miR-124-3p, hsa-miR-126-5p, hsa-miR-139-5p, hsa-miR-1-3p
RP1-239B22.5	PHLPP2	hsa-miR-141-3p, hsa-miR-181a-5p, hsa-miR-27a-3p
RP1-239B22.5	NOTCH1	hsa-miR-101-3p, hsa-miR-139-5p, hsa-miR-144-3p, hsa-miR-181a-5p, hsa-miR-27b-3p
RP1-239B22.5	MCL1	hsa-miR-101-3p, hsa-miR-139-5p, hsa-miR-181a-5p, hsa-miR-181b-5p, hsa-miR-582-5p
RP1-239B22.5	KRAS	hsa-miR-1-3p, hsa-miR-181a-5p, hsa-miR-181c-5p, hsa-miR-206, hsa-miR-27a-3p, hsa-miR-365a-3p, hsa-miR-613
RP1-239B22.5	HIPK2	hsa-miR-141-3p, hsa-miR-181a-5p, hsa-miR-27a-3p
RP1-239B22.5	FLT1	hsa-miR-181a-5p, hsa-miR-199a-3p, hsa-miR-222-3p
RP1-239B22.5	ETS1	hsa-miR-124-3p, hsa-miR-126-5p, hsa-miR-1-3p, hsa-miR-144-3p, hsa-miR-145-5p, hsa-miR-221-3p, hsa-miR-222-3p
RP1-239B22.5	CTNNB1	hsa-miR-101-3p, hsa-miR-124-3p, hsa-miR-181a-5p, hsa-miR-200a-3p
RP1-239B22.5	CREB1	hsa-miR-150-5p, hsa-miR-181b-5p, hsa-miR-27a-3p, hsa-miR-27b-3p, hsa-miR-582-5p
RP1-239B22.5	CDH2	hsa-miR-124-3p, hsa-miR-145-5p, hsa-miR-200a-3p
RP1-239B22.5	BCL2	hsa-miR-139-5p, hsa-miR-141-3p, hsa-miR-181a-5p, hsa-miR-181b-5p, hsa-miR-181c-5p, hsa-miR-365a-3p, hsa-miR-7-5p
RP1-239B22.5	ABCC1	hsa-miR-145-5p, hsa-miR-345-5p, hsa-miR-7-5p
RP1-225E12.2	RECK	hsa-miR-15a-5p, hsa-miR-15b-5p, hsa-miR-16-5p
RP1-225E12.2	PURA	hsa-miR-15a-5p, hsa-miR-15b-5p, hsa-miR-16-5p
RP1-225E12.2	IGF1R	hsa-miR-16-5p, hsa-miR-497-5p, hsa-miR-503-5p
RP1-225E12.2	BCL2	hsa-miR-15a-5p, hsa-miR-15b-5p, hsa-miR-16-5p, hsa-miR-195-5p, hsa-miR-497-5p, hsa-miR-503-5p
RP11-98I9.4	BACH1	hsa-miR-18a-5p, hsa-miR-196a-5p, hsa-miR-25-3p
RP11-98I9.4	EZH2	hsa-miR-125a-3p, hsa-miR-185-5p, hsa-miR-214-3p, hsa-miR-25-3p
RP11-98I9.4	BCL2L11	hsa-miR-214-3p, hsa-miR-25-3p, hsa-miR-32-5p, hsa-miR-363-3p, hsa-miR-92a-3p
RP11-96K19.2	CCKBR	hsa-miR-148a-3p, hsa-miR-148b-3p, hsa-miR-152-3p
RP11-96D1.11	SP1	hsa-miR-137, hsa-miR-22-3p, hsa-miR-335-5p
RP11-96D1.11	SOX4	hsa-miR-204-5p, hsa-miR-211-5p, hsa-miR-335-5p, hsa-miR-363-3p
RP11-96D1.11	CREB1	hsa-miR-204-5p, hsa-miR-34b-3p, hsa-miR-363-3p
RP11-864G5.3	EGFR	hsa-miR-128-3p, hsa-miR-137, hsa-miR-27a-3p, hsa-miR-27b-3p
RP11-864G5.3	WEE1	hsa-miR-128-3p, hsa-miR-27a-3p, hsa-miR-27b-3p
RP11-864G5.3	FOXO1	hsa-miR-186-5p, hsa-miR-27a-3p, hsa-miR-27b-3p
RP11-864G5.3	XIAP	hsa-miR-186-5p, hsa-miR-192-5p, hsa-miR-215-5p
RP11-864G5.3	WNK1	hsa-miR-192-5p, hsa-miR-215-5p, hsa-miR-27a-3p
RP11-864G5.3	ABCA1	hsa-miR-128-3p, hsa-miR-27a-3p, hsa-miR-27b-3p
RP11-819C21.1	CHUK	hsa-miR-16-5p, hsa-miR-223-3p, hsa-miR-98-5p
RP11-819C21.1	WASF3	hsa-miR-200b-3p, hsa-miR-218-5p, hsa-miR-429
RP11-819C21.1	FOXO1	hsa-miR-132-3p, hsa-miR-186-5p, hsa-miR-196a-5p, hsa-miR-200c-3p, hsa-miR-222-3p, hsa-miR-223-3p, hsa-miR-27a-3p, hsa-miR-27b-3p, hsa-miR-370-3p
RP11-819C21.1	ABCB1	hsa-miR-186-5p, hsa-miR-223-3p, hsa-miR-451a, hsa-miR-495-3p
RP11-819C21.1	ZEB2	hsa-miR-132-3p, hsa-miR-200b-3p, hsa-miR-200c-3p, hsa-miR-221-3p, hsa-miR-335-5p, hsa-miR-429
RP11-819C21.1	ZEB1	hsa-miR-130b-3p, hsa-miR-200b-3p, hsa-miR-200c-3p, hsa-miR-223-3p, hsa-miR-409-3p, hsa-miR-429, hsa-miR-494-3p
RP11-819C21.1	XIAP	hsa-miR-130a-3p, hsa-miR-186-5p, hsa-miR-200b-3p, hsa-miR-200c-3p, hsa-miR-429
RP11-819C21.1	WDR37	hsa-miR-200b-3p, hsa-miR-200c-3p, hsa-miR-429
RP11-819C21.1	STAT3	hsa-let-7a-5p, hsa-let-7c-5p, hsa-miR-106a-5p, hsa-miR-130b-3p, hsa-miR-223-3p, hsa-miR-340-5p
RP11-819C21.1	SP1	hsa-miR-145-5p, hsa-miR-200b-3p, hsa-miR-200c-3p, hsa-miR-218-5p, hsa-miR-223-3p, hsa-miR-27a-3p, hsa-miR-335-5p, hsa-miR-429
RP11-819C21.1	SMAD2	hsa-let-7g-5p, hsa-miR-132-3p, hsa-miR-145-5p, hsa-miR-200b-3p, hsa-miR-212-3p, hsa-miR-27a-3p, hsa-miR-27b-3p, hsa-miR-323a-3p
RP11-819C21.1	RPS6KB1	hsa-miR-145-5p, hsa-miR-16-5p, hsa-miR-200c-3p, hsa-miR-218-5p
RP11-819C21.1	RECK	hsa-miR-16-5p, hsa-miR-221-3p, hsa-miR-222-3p, hsa-miR-374b-5p, hsa-miR-409-3p
RP11-819C21.1	RB1	hsa-let-7a-5p, hsa-miR-106a-5p, hsa-miR-132-3p, hsa-miR-212-3p, hsa-miR-221-3p, hsa-miR-335-5p
RP11-819C21.1	MBNL2	hsa-miR-218-5p, hsa-miR-30a-5p, hsa-miR-30b-5p, hsa-miR-30e-5p
RP11-819C21.1	MBNL1	hsa-miR-30a-5p, hsa-miR-30b-5p, hsa-miR-30e-5p
RP11-819C21.1	MAPK1	hsa-let-7a-5p, hsa-let-7b-5p, hsa-miR-132-3p, hsa-miR-335-5p, hsa-miR-378a-3p, hsa-miR-451a
RP11-819C21.1	LIN28A	hsa-let-7a-5p, hsa-let-7b-5p, hsa-let-7e-5p, hsa-miR-370-3p
RP11-819C21.1	KRAS	hsa-let-7a-5p, hsa-let-7f-5p, hsa-let-7g-5p, hsa-miR-16-5p, hsa-miR-193b-3p, hsa-miR-200c-3p, hsa-miR-27a-3p, hsa-miR-340-5p, hsa-miR-365a-3p
RP11-819C21.1	FLT1	hsa-miR-200b-3p, hsa-miR-200c-3p, hsa-miR-222-3p
RP11-819C21.1	ETS1	hsa-miR-145-5p, hsa-miR-193b-3p, hsa-miR-200b-3p, hsa-miR-200c-3p, hsa-miR-221-3p, hsa-miR-222-3p
RP11-819C21.1	ERBB2IP	hsa-miR-200b-3p, hsa-miR-200c-3p, hsa-miR-429
RP11-819C21.1	ELMO2	hsa-miR-200b-3p, hsa-miR-200c-3p, hsa-miR-429
RP11-819C21.1	DNMT1	hsa-miR-185-5p, hsa-miR-200b-3p, hsa-miR-30a-5p, hsa-miR-30b-5p, hsa-miR-30c-5p, hsa-miR-429
RP11-819C21.1	DLL4	hsa-miR-130a-3p, hsa-miR-30b-5p, hsa-miR-30c-5p
RP11-819C21.1	DICER1	hsa-let-7a-5p, hsa-let-7c-5p, hsa-let-7d-5p, hsa-miR-130a-3p, hsa-miR-130b-3p, hsa-miR-200c-3p, hsa-miR-221-3p, hsa-miR-222-3p, hsa-miR-374a-5p
RP11-819C21.1	CTNND1	hsa-miR-145-5p, hsa-miR-409-3p, hsa-miR-98-5p
RP11-819C21.1	CRKL	hsa-miR-200b-3p, hsa-miR-200c-3p, hsa-miR-335-5p, hsa-miR-429
RP11-819C21.1	CCND2	hsa-let-7a-5p, hsa-let-7b-5p, hsa-miR-16-5p, hsa-miR-30c-5p, hsa-miR-340-5p, hsa-miR-98-5p
RP11-819C21.1	BCL9	hsa-miR-218-5p, hsa-miR-30a-5p, hsa-miR-30b-5p, hsa-miR-30c-5p, hsa-miR-30d-5p
RP11-819C21.1	ATM	hsa-miR-101-5p, hsa-miR-106a-5p, hsa-miR-223-3p, hsa-miR-374a-5p
RP11-819C21.1	APP	hsa-let-7a-5p, hsa-let-7d-5p, hsa-miR-106a-5p, hsa-miR-130a-3p, hsa-miR-16-5p
RP11-805J14.5	IL6	hsa-miR-136-5p, hsa-miR-146a-5p, hsa-miR-146b-5p
RP11-802E16.3	WEE1	hsa-miR-15a-5p, hsa-miR-15b-5p, hsa-miR-16-5p, hsa-miR-195-5p, hsa-miR-424-5p, hsa-miR-497-5p
RP11-802E16.3	YAP1	hsa-miR-15a-5p, hsa-miR-16-5p, hsa-miR-195-5p
RP11-802E16.3	RUNX2	hsa-miR-103a-3p, hsa-miR-195-5p, hsa-miR-221-5p, hsa-miR-497-5p
RP11-802E16.3	KLF4	hsa-miR-103a-3p, hsa-miR-107, hsa-miR-15a-5p
RP11-802E16.3	HMGA1	hsa-miR-125b-5p, hsa-miR-15a-5p, hsa-miR-16-5p, hsa-miR-195-5p
RP11-802E16.3	TAB3	hsa-miR-15a-5p, hsa-miR-15b-5p, hsa-miR-16-5p, hsa-miR-195-5p, hsa-miR-497-5p
RP11-802E16.3	RECK	hsa-miR-15a-5p, hsa-miR-15b-5p, hsa-miR-16-5p
RP11-802E16.3	IGF1R	hsa-miR-125b-5p, hsa-miR-16-5p, hsa-miR-214-5p, hsa-miR-486-5p, hsa-miR-497-5p
RP11-802E16.3	FGFR1	hsa-miR-16-5p, hsa-miR-214-3p, hsa-miR-424-5p
RP11-802E16.3	FGF2	hsa-miR-16-5p, hsa-miR-195-5p, hsa-miR-424-5p
RP11-802E16.3	DICER1	hsa-miR-103a-3p, hsa-miR-107, hsa-miR-195-5p, hsa-miR-497-5p
RP11-802E16.3	CDK6	hsa-miR-103a-3p, hsa-miR-107, hsa-miR-16-5p, hsa-miR-195-5p, hsa-miR-214-3p, hsa-miR-214-5p, hsa-miR-424-5p, hsa-miR-497-5p
RP11-802E16.3	BCL2L2	hsa-miR-125b-5p, hsa-miR-195-5p, hsa-miR-214-3p
RP11-802E16.3	ACTB	hsa-miR-15a-5p, hsa-miR-15b-5p, hsa-miR-16-5p, hsa-miR-497-5p
RP11-79H23.3	EGFR	hsa-miR-132-3p, hsa-miR-21-5p, hsa-miR-27a-3p, hsa-miR-27b-3p
RP11-79H23.3	TGFBR2	hsa-miR-142-5p, hsa-miR-181c-5p, hsa-miR-21-5p, hsa-miR-27a-3p, hsa-miR-590-5p
RP11-79H23.3	TGFBR1	hsa-miR-181a-5p, hsa-miR-181c-5p, hsa-miR-27b-3p
RP11-79H23.3	IL6R	hsa-miR-23a-3p, hsa-miR-34a-5p, hsa-miR-34c-5p
RP11-79H23.3	NOTCH2	hsa-miR-181c-5p, hsa-miR-23b-3p, hsa-miR-34a-5p
RP11-79H23.3	NFE2L2	hsa-miR-142-5p, hsa-miR-144-3p, hsa-miR-27a-3p
RP11-79H23.3	HIF1A	hsa-miR-142-5p, hsa-miR-23b-3p, hsa-miR-27a-3p, hsa-miR-382-5p
RP11-79H23.3	GDF5	hsa-miR-132-3p, hsa-miR-21-5p, hsa-miR-34a-5p
RP11-79H23.3	ATF3	hsa-miR-30c-2-3p, hsa-miR-494-3p, hsa-miR-590-5p
RP11-77H9.2	PER1	hsa-miR-146b-3p, hsa-miR-29a-3p, hsa-miR-29b-3p, hsa-miR-29c-3p
RP11-77H9.2	MYC	hsa-miR-122-5p, hsa-miR-135a-5p, hsa-miR-135b-5p, hsa-miR-145-5p, hsa-miR-20a-5p, hsa-miR-24-3p, hsa-miR-29a-3p, hsa-miR-29b-3p, hsa-miR-92a-3p
RP11-77H9.2	ERBB3	hsa-miR-125a-5p, hsa-miR-125b-5p, hsa-miR-199a-5p
RP11-77H9.2	YOD1	hsa-miR-106b-5p, hsa-miR-20a-5p, hsa-miR-25-3p
RP11-77H9.2	TET2	hsa-miR-125b-5p, hsa-miR-29a-3p, hsa-miR-29b-3p, hsa-miR-29c-3p, hsa-miR-7-5p
RP11-77H9.2	SOX4	hsa-miR-140-5p, hsa-miR-204-5p, hsa-miR-338-3p
RP11-77H9.2	SMAD7	hsa-miR-106b-5p, hsa-miR-20a-5p, hsa-miR-25-3p, hsa-miR-424-5p, hsa-miR-92b-3p
RP11-77H9.2	SIRT1	hsa-miR-199a-5p, hsa-miR-199b-5p, hsa-miR-204-5p, hsa-miR-29c-3p, hsa-miR-92a-3p, hsa-miR-9-5p
RP11-77H9.2	SETD2	hsa-miR-106b-5p, hsa-miR-199a-5p, hsa-miR-199b-5p
RP11-77H9.2	SET	hsa-miR-125b-5p, hsa-miR-145-5p, hsa-miR-199b-5p
RP11-77H9.2	RECK	hsa-miR-135b-5p, hsa-miR-183-5p, hsa-miR-25-3p, hsa-miR-92b-3p
RP11-77H9.2	RAF1	hsa-miR-125a-5p, hsa-miR-125b-5p, hsa-miR-7-5p
RP11-77H9.2	PDGFRA	hsa-miR-140-5p, hsa-miR-218-5p, hsa-miR-29b-3p
RP11-77H9.2	NASP	hsa-miR-29a-3p, hsa-miR-29b-3p, hsa-miR-29c-3p
RP11-77H9.2	MYCN	hsa-miR-29a-3p, hsa-miR-29b-3p, hsa-miR-29c-3p
RP11-77H9.2	MCL1	hsa-miR-125a-5p, hsa-miR-125b-5p, hsa-miR-20a-5p, hsa-miR-29a-3p, hsa-miR-29b-3p, hsa-miR-29c-3p
RP11-77H9.2	LRP6	hsa-miR-183-5p, hsa-miR-29b-3p, hsa-miR-29c-3p
RP11-77H9.2	IGF1R	hsa-miR-122-5p, hsa-miR-125b-5p, hsa-miR-140-5p, hsa-miR-145-5p, hsa-miR-223-5p, hsa-miR-7-5p
RP11-77H9.2	HDAC4	hsa-miR-125a-5p, hsa-miR-140-5p, hsa-miR-29b-3p, hsa-miR-9-5p
RP11-77H9.2	GSK3B	hsa-miR-183-5p, hsa-miR-199a-5p, hsa-miR-29a-3p, hsa-miR-29b-3p, hsa-miR-9-5p
RP11-77H9.2	ETS1	hsa-miR-125b-5p, hsa-miR-145-5p, hsa-miR-199a-5p, hsa-miR-9-5p
RP11-77H9.2	ELAVL1	hsa-miR-125a-5p, hsa-miR-29b-3p, hsa-miR-9-5p
RP11-77H9.2	E2F3	hsa-miR-106b-5p, hsa-miR-125a-5p, hsa-miR-125b-5p, hsa-miR-145-5p, hsa-miR-20a-5p
RP11-77H9.2	DNMT3A	hsa-miR-29a-3p, hsa-miR-29b-3p, hsa-miR-29c-3p
RP11-77H9.2	DNMT1	hsa-miR-140-5p, hsa-miR-20a-5p, hsa-miR-29a-3p, hsa-miR-29b-3p, hsa-miR-92a-3p
RP11-77H9.2	CCND2	hsa-miR-106b-5p, hsa-miR-20a-5p, hsa-miR-29a-3p, hsa-miR-29b-3p, hsa-miR-29c-3p
RP11-77H9.2	BMPR2	hsa-miR-135a-5p, hsa-miR-135b-5p, hsa-miR-20a-5p, hsa-miR-92a-3p
RP11-77H9.2	BCL2L2	hsa-miR-122-5p, hsa-miR-125b-5p, hsa-miR-204-5p
RP11-77H9.2	BCL2L11	hsa-miR-106b-5p, hsa-miR-20a-5p, hsa-miR-24-3p, hsa-miR-25-3p, hsa-miR-32-5p, hsa-miR-92a-3p, hsa-miR-9-5p
RP11-77H9.2	AKT3	hsa-miR-122-5p, hsa-miR-29a-3p, hsa-miR-29b-3p, hsa-miR-29c-3p
RP11-77H9.2	ACVR1B	hsa-miR-135b-5p, hsa-miR-199a-5p, hsa-miR-24-3p
RP11-77H9.2	ABCC1	hsa-miR-145-5p, hsa-miR-7-5p, hsa-miR-9-5p
RP11-774O3.3	PTEN	hsa-miR-181a-5p, hsa-miR-26a-5p, hsa-miR-26b-5p
RP11-760H22.2	PTEN	hsa-miR-19a-3p, hsa-miR-19b-3p, hsa-miR-221-3p, hsa-miR-23a-3p, hsa-miR-23b-3p
RP11-760H22.2	KIT	hsa-miR-19a-3p, hsa-miR-221-3p, hsa-miR-34a-5p
RP11-760H22.2	CXCL12	hsa-miR-221-3p, hsa-miR-23a-3p, hsa-miR-27b-3p
RP11-760H22.2	TGFBR2	hsa-miR-19a-3p, hsa-miR-19b-3p, hsa-miR-27a-3p
RP11-760H22.2	PSAP	hsa-miR-19a-3p, hsa-miR-27a-3p, hsa-miR-27b-3p
RP11-760H22.2	SIRT1	hsa-miR-221-3p, hsa-miR-23b-3p, hsa-miR-34a-5p
RP11-760H22.2	GJA1	hsa-miR-221-3p, hsa-miR-23a-3p, hsa-miR-23b-3p
RP11-758M4.4	HMGA2	hsa-let-7a-5p, hsa-let-7b-5p, hsa-let-7c-5p, hsa-let-7d-5p, hsa-let-7e-5p, hsa-let-7f-5p, hsa-let-7g-5p, hsa-miR-98-5p
RP11-758M4.4	WNT1	hsa-let-7a-5p, hsa-let-7e-5p, hsa-miR-139-5p
RP11-757F18.5	BCL2L11	hsa-miR-25-3p, hsa-miR-32-5p, hsa-miR-363-3p, hsa-miR-92a-3p
RP11-736K20.5	EGFR	hsa-miR-125a-5p, hsa-miR-125b-5p, hsa-miR-145-5p
RP11-727A23.5	SP1	hsa-miR-137, hsa-miR-218-5p, hsa-miR-375
RP11-71N10.1	EGFR	hsa-miR-137, hsa-miR-27a-3p, hsa-miR-27b-3p
RP11-71N10.1	WEE1	hsa-miR-221-3p, hsa-miR-27a-3p, hsa-miR-27b-3p
RP11-71N10.1	CDK6	hsa-miR-103a-3p, hsa-miR-107, hsa-miR-137
RP11-714G18.1	EGFR	hsa-miR-128-3p, hsa-miR-27a-3p, hsa-miR-27b-3p
RP11-6O2.4	YAP1	hsa-miR-15a-5p, hsa-miR-16-5p, hsa-miR-195-5p
RP11-6O2.4	TAB3	hsa-miR-15a-5p, hsa-miR-15b-5p, hsa-miR-16-5p, hsa-miR-195-5p
RP11-6O2.4	SMARCA5	hsa-miR-100-5p, hsa-miR-151a-5p, hsa-miR-99a-5p
RP11-6O2.4	PURA	hsa-miR-15a-5p, hsa-miR-15b-5p, hsa-miR-16-5p
RP11-6O2.4	MTOR	hsa-miR-100-5p, hsa-miR-16-5p, hsa-miR-99a-5p
RP11-6O2.4	IGF1R	hsa-miR-100-5p, hsa-miR-16-5p, hsa-miR-185-5p, hsa-miR-99a-5p
RP11-6O2.4	CCND2	hsa-miR-15a-5p, hsa-miR-16-1-3p, hsa-miR-16-5p
RP11-6O2.4	BCL2	hsa-miR-100-5p, hsa-miR-15a-5p, hsa-miR-15b-5p, hsa-miR-16-1-3p, hsa-miR-16-5p, hsa-miR-195-5p, hsa-miR-451a
RP11-6O2.4	ACTB	hsa-miR-15a-5p, hsa-miR-15b-5p, hsa-miR-16-5p
RP11-66N24.4	CCND2	hsa-miR-106b-5p, hsa-miR-17-5p, hsa-miR-20a-5p
RP11-661A12.4	CDK4	hsa-miR-124-3p, hsa-miR-1-3p, hsa-miR-34b-5p, hsa-miR-34c-5p, hsa-miR-449b-5p
RP11-661A12.4	CCNE2	hsa-miR-34b-5p, hsa-miR-34c-5p, hsa-miR-449b-5p
RP11-63M22.2	ZEB1	hsa-miR-142-5p, hsa-miR-409-3p, hsa-miR-429, hsa-miR-494-3p
RP11-63M22.2	NTRK3	hsa-miR-128-3p, hsa-miR-185-5p, hsa-miR-384
RP11-627G23.1	NLK	hsa-miR-181a-5p, hsa-miR-181b-5p, hsa-miR-181c-5p
RP11-626G11.3	TGFBR2	hsa-miR-106a-5p, hsa-miR-17-5p, hsa-miR-20a-5p, hsa-miR-302b-3p, hsa-miR-302d-3p, hsa-miR-372-3p, hsa-miR-373-3p, hsa-miR-520a-3p
RP11-626G11.3	RUNX1	hsa-miR-106a-5p, hsa-miR-17-5p, hsa-miR-20a-5p, hsa-miR-215-5p
RP11-611O2.5	PELI1	hsa-miR-106b-5p, hsa-miR-17-5p, hsa-miR-20a-5p, hsa-miR-93-5p
RP11-611O2.5	DLC1	hsa-miR-200b-3p, hsa-miR-200c-3p, hsa-miR-429
RP11-611O2.5	CDK4	hsa-miR-182-5p, hsa-miR-24-3p, hsa-miR-302a-3p, hsa-miR-377-3p, hsa-miR-506-3p
RP11-611O2.5	LY75	hsa-miR-106b-5p, hsa-miR-17-5p, hsa-miR-20a-5p, hsa-miR-93-5p
RP11-589M4.1	IGF1R	hsa-miR-140-5p, hsa-miR-141-3p, hsa-miR-320a
RP11-589M4.1	ACVR2B	hsa-miR-141-3p, hsa-miR-192-5p, hsa-miR-215-5p
RP11-582J16.4	WEE1	hsa-miR-15a-5p, hsa-miR-15b-5p, hsa-miR-16-5p, hsa-miR-195-5p, hsa-miR-497-5p
RP11-582J16.4	CCND1	hsa-miR-15a-5p, hsa-miR-15b-5p, hsa-miR-16-5p, hsa-miR-195-5p, hsa-miR-365a-3p, hsa-miR-497-5p
RP11-582J16.4	VEGFA	hsa-miR-15a-5p, hsa-miR-15b-5p, hsa-miR-16-5p, hsa-miR-195-5p
RP11-582J16.4	RPS6KB1	hsa-miR-16-5p, hsa-miR-195-5p, hsa-miR-497-5p
RP11-582J16.4	RAF1	hsa-miR-16-5p, hsa-miR-195-5p, hsa-miR-497-5p
RP11-582J16.4	CDK6	hsa-miR-16-5p, hsa-miR-195-5p, hsa-miR-497-5p
RP11-582J16.4	BCL2	hsa-miR-15a-5p, hsa-miR-15b-5p, hsa-miR-16-5p, hsa-miR-195-5p, hsa-miR-365a-3p, hsa-miR-497-5p
RP11-54O7.1	WEE1	hsa-miR-15a-5p, hsa-miR-15b-5p, hsa-miR-16-5p, hsa-miR-195-5p, hsa-miR-424-5p, hsa-miR-497-5p, hsa-miR-503-5p
RP11-54O7.1	YAP1	hsa-miR-15a-5p, hsa-miR-16-5p, hsa-miR-195-5p, hsa-miR-375
RP11-54O7.1	RUNX3	hsa-miR-130a-3p, hsa-miR-130b-3p, hsa-miR-148a-3p, hsa-miR-301a-3p, hsa-miR-375
RP11-54O7.1	NRP1	hsa-miR-148a-3p, hsa-miR-338-3p, hsa-miR-9-5p
RP11-54O7.1	ITGA5	hsa-miR-148a-3p, hsa-miR-148b-3p, hsa-miR-205-5p, hsa-miR-326, hsa-miR-330-5p
RP11-54O7.1	ERBB2	hsa-miR-130b-3p, hsa-miR-199a-5p, hsa-miR-199b-5p, hsa-miR-205-5p, hsa-miR-375
RP11-54O7.1	NOTCH2	hsa-miR-107, hsa-miR-326, hsa-miR-9-5p
RP11-54O7.1	FGFR1	hsa-miR-16-5p, hsa-miR-296-5p, hsa-miR-424-5p, hsa-miR-503-5p
RP11-54O7.1	CDK6	hsa-miR-103a-3p, hsa-miR-107, hsa-miR-16-5p, hsa-miR-195-5p, hsa-miR-30a-3p, hsa-miR-424-5p, hsa-miR-497-5p
RP11-54O7.1	BBC3	hsa-miR-15a-5p, hsa-miR-16-5p, hsa-miR-296-5p, hsa-miR-301a-3p
RP11-540O11.1	MYB	hsa-miR-103a-3p, hsa-miR-107, hsa-miR-15a-5p, hsa-miR-16-5p, hsa-miR-195-5p, hsa-miR-424-5p, hsa-miR-503-5p
RP11-540O11.1	RECK	hsa-miR-15a-5p, hsa-miR-15b-5p, hsa-miR-16-5p
RP11-540O11.1	RAF1	hsa-miR-16-5p, hsa-miR-195-5p, hsa-miR-497-5p
RP11-540O11.1	E2F3	hsa-miR-195-5p, hsa-miR-497-5p, hsa-miR-503-5p
RP11-539L10.2	WNT1	hsa-miR-148a-3p, hsa-miR-148b-3p, hsa-miR-152-3p
RP11-531A24.3	KIT	hsa-miR-137, hsa-miR-221-3p, hsa-miR-222-3p
RP11-531A24.3	CDKN1B	hsa-miR-181a-5p, hsa-miR-200b-3p, hsa-miR-221-3p, hsa-miR-222-3p
RP11-531A24.3	ZFPM2	hsa-miR-141-3p, hsa-miR-200a-3p, hsa-miR-200b-3p, hsa-miR-200c-3p
RP11-531A24.3	ZEB2	hsa-miR-132-3p, hsa-miR-141-3p, hsa-miR-200a-3p, hsa-miR-200b-3p, hsa-miR-200c-3p, hsa-miR-221-3p
RP11-531A24.3	WDR37	hsa-miR-141-3p, hsa-miR-200a-3p, hsa-miR-200b-3p, hsa-miR-200c-3p
RP11-531A24.3	SOX4	hsa-miR-132-3p, hsa-miR-30a-5p, hsa-miR-363-3p, hsa-miR-369-3p
RP11-531A24.3	SIRT1	hsa-miR-132-3p, hsa-miR-181a-5p, hsa-miR-181b-5p, hsa-miR-181c-5p, hsa-miR-200c-3p, hsa-miR-221-3p, hsa-miR-543, hsa-miR-92a-3p
RP11-531A24.3	RBFOX2	hsa-miR-320a, hsa-miR-320b, hsa-miR-320d
RP11-531A24.3	PTPRD	hsa-miR-141-3p, hsa-miR-200a-3p, hsa-miR-200b-3p, hsa-miR-200c-3p
RP11-531A24.3	FBXW7	hsa-miR-107, hsa-miR-25-3p, hsa-miR-32-5p, hsa-miR-363-3p, hsa-miR-92a-3p
RP11-531A24.3	CDKN1C	hsa-miR-221-3p, hsa-miR-222-3p, hsa-miR-25-3p
RP11-531A24.3	CDC42	hsa-miR-107, hsa-miR-137, hsa-miR-224-5p, hsa-miR-30c-5p
RP1-151F17.1	HOXB5	hsa-miR-200b-3p, hsa-miR-200c-3p, hsa-miR-429, hsa-miR-7-5p
RP11-518L10.5	PTK2	hsa-miR-193a-3p, hsa-miR-379-5p, hsa-miR-543
RP11-513I15.6	SOX4	hsa-miR-129-5p, hsa-miR-204-5p, hsa-miR-211-5p
RP11-498C9.3	MMP2	hsa-miR-106b-5p, hsa-miR-130b-3p, hsa-miR-17-5p, hsa-miR-218-5p, hsa-miR-491-5p
RP11-498C9.3	CLIC4	hsa-miR-106b-5p, hsa-miR-122-5p, hsa-miR-17-5p, hsa-miR-20a-5p
RP11-498C9.3	RUNX1	hsa-miR-106a-5p, hsa-miR-17-5p, hsa-miR-20a-5p, hsa-miR-378a-3p
RP11-498C9.3	MBD2	hsa-miR-224-5p, hsa-miR-302a-3p, hsa-miR-373-3p
RP11-498C9.3	E2F1	hsa-miR-106a-5p, hsa-miR-106b-5p, hsa-miR-122-5p, hsa-miR-17-5p, hsa-miR-193a-3p, hsa-miR-20a-5p, hsa-miR-302b-3p
RP11-498C9.3	ZBTB4	hsa-miR-106b-5p, hsa-miR-130b-3p, hsa-miR-17-5p
RP11-498C9.3	TIMP2	hsa-miR-106a-5p, hsa-miR-17-5p, hsa-miR-20a-5p, hsa-miR-301a-3p
RP11-498C9.3	STAT3	hsa-miR-106a-5p, hsa-miR-106b-5p, hsa-miR-130b-3p, hsa-miR-17-5p, hsa-miR-20a-5p, hsa-miR-20b-5p, hsa-miR-520c-3p
RP11-498C9.3	MEF2D	hsa-miR-122-5p, hsa-miR-17-5p, hsa-miR-20a-5p
RP11-498C9.3	MCL1	hsa-miR-106a-5p, hsa-miR-133b, hsa-miR-193a-3p, hsa-miR-193b-3p, hsa-miR-20a-5p, hsa-miR-302b-3p
RP11-491F9.8	IGF2BP1	hsa-let-7a-5p, hsa-let-7b-5p, hsa-let-7g-5p
RP11-488L18.10	CASP3	hsa-let-7a-5p, hsa-let-7g-5p, hsa-miR-30c-5p
RP11-488C13.6	XIAP	hsa-miR-130a-3p, hsa-miR-24-3p, hsa-miR-7-5p
RP11-488C13.6	SIRT1	hsa-miR-138-5p, hsa-miR-34a-5p, hsa-miR-449a, hsa-miR-449b-5p
RP11-488C13.6	ROCK1	hsa-miR-130a-3p, hsa-miR-148a-3p, hsa-miR-148b-3p, hsa-miR-335-5p
RP11-488C13.6	PPARA	hsa-miR-130a-3p, hsa-miR-130b-3p, hsa-miR-34a-5p
RP11-488C13.6	NOTCH1	hsa-miR-24-3p, hsa-miR-34a-5p, hsa-miR-34c-5p, hsa-miR-449a
RP11-488C13.6	IGF1R	hsa-miR-138-5p, hsa-miR-148a-3p, hsa-miR-152-3p, hsa-miR-335-5p, hsa-miR-376c-3p, hsa-miR-7-5p
RP11-488C13.6	E2F3	hsa-miR-34a-5p, hsa-miR-34c-5p, hsa-miR-449a
RP11-488C13.6	DNMT1	hsa-miR-148a-3p, hsa-miR-152-3p, hsa-miR-301b-3p
RP11-488C13.6	BCL2	hsa-miR-148a-3p, hsa-miR-34a-5p, hsa-miR-34c-5p, hsa-miR-376c-3p, hsa-miR-449a, hsa-miR-7-5p
RP11-486M23.1	BBC3	hsa-miR-149-5p, hsa-miR-221-3p, hsa-miR-222-3p
RP11-473M20.16	WEE1	hsa-miR-106b-5p, hsa-miR-17-5p, hsa-miR-20a-5p
RP11-473M20.16	HK2	hsa-miR-125a-5p, hsa-miR-125b-5p, hsa-miR-143-3p
RP11-473M20.16	BACH1	hsa-miR-106b-5p, hsa-miR-17-5p, hsa-miR-20a-5p, hsa-miR-93-5p
RP11-473M20.16	RUNX1	hsa-miR-106a-5p, hsa-miR-17-5p, hsa-miR-20a-5p
RP11-473M20.16	VEGFA	hsa-miR-106a-5p, hsa-miR-106b-5p, hsa-miR-125a-5p, hsa-miR-126-5p, hsa-miR-17-5p, hsa-miR-20a-5p, hsa-miR-20b-5p, hsa-miR-373-3p, hsa-miR-93-5p
RP11-473M20.16	LY75	hsa-miR-106b-5p, hsa-miR-17-5p, hsa-miR-20a-5p, hsa-miR-93-5p
RP11-473M20.16	CDKN1A	hsa-miR-106a-5p, hsa-miR-106b-5p, hsa-miR-10b-5p, hsa-miR-125a-5p, hsa-miR-17-5p, hsa-miR-20a-5p, hsa-miR-20b-5p, hsa-miR-93-5p
RP11-473M20.16	CD44	hsa-miR-125b-5p, hsa-miR-143-3p, hsa-miR-373-3p
RP11-473M20.16	ATG16L1	hsa-miR-106b-5p, hsa-miR-20a-5p, hsa-miR-93-5p
RP11-473I1.5	ZEB1	hsa-miR-200b-3p, hsa-miR-200c-3p, hsa-miR-429
RP11-473I1.5	XIAP	hsa-miR-200b-3p, hsa-miR-200c-3p, hsa-miR-429
RP11-473I1.5	2018-09-07	hsa-miR-200b-3p, hsa-miR-200c-3p, hsa-miR-429
RP11-473I1.5	RASSF2	hsa-miR-200b-3p, hsa-miR-200c-3p, hsa-miR-429
RP11-473I1.5	ERBB2IP	hsa-miR-200b-3p, hsa-miR-200c-3p, hsa-miR-429
RP11-473I1.5	CRKL	hsa-miR-200b-3p, hsa-miR-200c-3p, hsa-miR-429
RP11-46C24.7	MYCN	hsa-miR-29a-3p, hsa-miR-29b-3p, hsa-miR-29c-3p
RP11-46C24.6	SMAD4	hsa-miR-125b-5p, hsa-miR-27a-3p, hsa-miR-34a-5p
RP11-46C24.6	SMAD2	hsa-miR-148a-3p, hsa-miR-206, hsa-miR-27a-3p, hsa-miR-27b-3p
RP11-46C24.6	SIRT1	hsa-miR-34a-5p, hsa-miR-449a, hsa-miR-449b-5p
RP11-46A10.5	ZBTB4	hsa-miR-106b-5p, hsa-miR-130b-3p, hsa-miR-17-5p, hsa-miR-93-5p
RP11-46A10.5	YOD1	hsa-miR-106b-5p, hsa-miR-17-5p, hsa-miR-20a-5p, hsa-miR-93-5p
RP11-46A10.5	TP53INP1	hsa-miR-130b-3p, hsa-miR-17-5p, hsa-miR-20a-5p, hsa-miR-93-5p
RP11-46A10.5	SMAD4	hsa-miR-130a-3p, hsa-miR-130b-3p, hsa-miR-17-5p, hsa-miR-20a-5p, hsa-miR-224-5p, hsa-miR-301a-3p, hsa-miR-454-3p
RP11-46A10.5	RBL2	hsa-miR-106a-5p, hsa-miR-106b-5p, hsa-miR-17-5p, hsa-miR-20a-5p
RP11-46A10.5	RBL1	hsa-miR-106b-5p, hsa-miR-17-5p, hsa-miR-20a-5p
RP11-46A10.5	PHLPP2	hsa-miR-20a-5p, hsa-miR-224-5p, hsa-miR-93-5p
RP11-46A10.5	MYCN	hsa-miR-103a-3p, hsa-miR-34b-5p, hsa-miR-34c-5p, hsa-miR-449b-5p
RP11-46A10.5	MFN2	hsa-miR-106a-5p, hsa-miR-106b-5p, hsa-miR-17-5p
RP11-46A10.5	MEF2D	hsa-miR-103a-3p, hsa-miR-122-5p, hsa-miR-17-5p, hsa-miR-20a-5p
RP11-46A10.5	MAPK1	hsa-miR-17-5p, hsa-miR-20a-5p, hsa-miR-214-3p, hsa-miR-378a-3p
RP11-46A10.5	MAP3K12	hsa-miR-130a-3p, hsa-miR-17-5p, hsa-miR-20a-5p
RP11-46A10.5	JAK1	hsa-miR-106b-5p, hsa-miR-107, hsa-miR-17-5p
RP11-46A10.5	GIT1	hsa-miR-149-5p, hsa-miR-34c-5p, hsa-miR-491-5p
RP11-46A10.5	E2F3	hsa-miR-106b-5p, hsa-miR-17-5p, hsa-miR-20a-5p, hsa-miR-34c-5p, hsa-miR-497-5p
RP11-46A10.5	DNMT1	hsa-miR-148a-3p, hsa-miR-152-3p, hsa-miR-17-5p, hsa-miR-185-5p, hsa-miR-20a-5p, hsa-miR-301b-3p
RP11-46A10.5	DICER1	hsa-miR-103a-3p, hsa-miR-107, hsa-miR-130a-3p, hsa-miR-130b-3p, hsa-miR-497-5p
RP11-46A10.5	BCL2L11	hsa-miR-106b-5p, hsa-miR-148a-3p, hsa-miR-17-5p, hsa-miR-20a-5p, hsa-miR-214-3p, hsa-miR-301a-3p, hsa-miR-301b-3p
RP11-46A10.5	BCL2	hsa-miR-148a-3p, hsa-miR-16-1-3p, hsa-miR-17-5p, hsa-miR-20a-5p, hsa-miR-224-5p, hsa-miR-34b-5p, hsa-miR-34c-5p, hsa-miR-497-5p
RP11-46A10.5	APP	hsa-miR-106a-5p, hsa-miR-106b-5p, hsa-miR-130a-3p, hsa-miR-17-5p, hsa-miR-20a-5p
RP11-46A10.5	AKT3	hsa-miR-122-5p, hsa-miR-20b-5p, hsa-miR-519d-3p
RP11-46A10.5	ADAR	hsa-miR-1-3p, hsa-miR-17-5p, hsa-miR-20a-5p
RP11-462G2.1	RAP1B	hsa-miR-181a-5p, hsa-miR-181b-5p, hsa-miR-181c-5p
RP11-462G2.1	CDX2	hsa-miR-181a-5p, hsa-miR-181b-5p, hsa-miR-181c-5p
RP11-452L6.1	IGF1R	hsa-miR-141-3p, hsa-miR-152-3p, hsa-miR-214-5p
RP11-44F21.5	WNT1	hsa-let-7a-5p, hsa-let-7e-5p, hsa-miR-122-5p, hsa-miR-34a-5p
RP11-44F21.5	CYP19A1	hsa-let-7f-5p, hsa-miR-378a-3p, hsa-miR-98-5p
RP11-44F21.5	BAX	hsa-let-7b-5p, hsa-miR-122-5p, hsa-miR-34a-5p
RP11-446J8.1	HMGA2	hsa-let-7d-5p, hsa-let-7f-5p, hsa-miR-196a-5p, hsa-miR-98-5p
RP11-446J8.1	MPL	hsa-let-7d-5p, hsa-let-7f-5p, hsa-miR-98-5p
RP11-443N24.2	IGF1R	hsa-let-7b-5p, hsa-let-7c-5p, hsa-let-7e-5p, hsa-miR-320a
RP11-439E19.10	ZBTB4	hsa-miR-106b-5p, hsa-miR-17-5p, hsa-miR-93-5p
RP11-439E19.10	YOD1	hsa-miR-106b-5p, hsa-miR-17-5p, hsa-miR-20a-5p, hsa-miR-93-5p
RP11-439E19.10	TP53INP1	hsa-miR-17-5p, hsa-miR-20a-5p, hsa-miR-93-5p
RP11-439E19.10	SMAD2	hsa-let-7g-5p, hsa-miR-205-5p, hsa-miR-425-5p
RP11-439E19.10	RBL2	hsa-miR-106a-5p, hsa-miR-106b-5p, hsa-miR-17-5p, hsa-miR-20a-5p
RP11-439E19.10	RBL1	hsa-miR-106b-5p, hsa-miR-17-5p, hsa-miR-20a-5p
RP11-439E19.10	PURA	hsa-miR-106b-5p, hsa-miR-20a-5p, hsa-miR-93-5p
RP11-439E19.10	PHLPP2	hsa-miR-205-5p, hsa-miR-20a-5p, hsa-miR-93-5p
RP11-439E19.10	MFN2	hsa-miR-106a-5p, hsa-miR-106b-5p, hsa-miR-17-5p
RP11-439E19.10	MAPK1	hsa-let-7a-5p, hsa-let-7b-5p, hsa-miR-126-5p, hsa-miR-17-5p, hsa-miR-20a-5p
RP11-439E19.10	KRAS	hsa-let-7a-5p, hsa-let-7f-5p, hsa-let-7g-5p, hsa-miR-365a-3p
RP11-439E19.10	KAT2B	hsa-miR-106b-5p, hsa-miR-17-5p, hsa-miR-93-5p
RP11-439E19.10	JAK1	hsa-miR-106b-5p, hsa-miR-17-5p, hsa-miR-30c-5p
RP11-439E19.10	E2F3	hsa-miR-106b-5p, hsa-miR-17-5p, hsa-miR-20a-5p
RP11-439E19.10	DNMT1	hsa-miR-17-5p, hsa-miR-185-5p, hsa-miR-20a-5p, hsa-miR-30b-5p, hsa-miR-30c-5p
RP11-439E19.10	CLIP1	hsa-miR-106b-5p, hsa-miR-17-5p, hsa-miR-20a-5p, hsa-miR-93-5p
RP11-439E19.10	CDC42	hsa-miR-185-5p, hsa-miR-216a-5p, hsa-miR-30c-5p
RP11-439E19.10	CCND2	hsa-let-7a-5p, hsa-let-7b-5p, hsa-miR-106b-5p, hsa-miR-17-5p, hsa-miR-20a-5p, hsa-miR-30c-5p
RP11-439E19.10	BCL2	hsa-miR-17-5p, hsa-miR-205-5p, hsa-miR-20a-5p, hsa-miR-30b-5p, hsa-miR-365a-3p
RP11-439E19.10	APP	hsa-let-7a-5p, hsa-miR-106a-5p, hsa-miR-106b-5p, hsa-miR-17-5p, hsa-miR-20a-5p
RP11-434B12.1	PTEN	hsa-miR-19a-3p, hsa-miR-19b-3p, hsa-miR-320a
RP11-428C19.4	SMAD4	hsa-miR-19a-3p, hsa-miR-19b-3p, hsa-miR-301a-3p
RP11-424G14.1	NCOA3	hsa-miR-18a-5p, hsa-miR-21-5p, hsa-miR-98-5p
RP11-424G14.1	DICER1	hsa-let-7a-5p, hsa-let-7c-5p, hsa-miR-18a-5p
RP11-424G14.1	BCL2	hsa-miR-143-3p, hsa-miR-18a-5p, hsa-miR-21-5p, hsa-miR-98-5p
RP11-421F16.3	BCL2	hsa-miR-139-5p, hsa-miR-141-3p, hsa-miR-153-3p, hsa-miR-33b-5p, hsa-miR-376c-3p, hsa-miR-448
RP11-414J4.2	CCND1	hsa-miR-15a-5p, hsa-miR-15b-5p, hsa-miR-16-5p, hsa-miR-195-5p, hsa-miR-424-5p, hsa-miR-497-5p
RP11-414J4.2	CHEK1	hsa-miR-15a-5p, hsa-miR-15b-5p, hsa-miR-16-5p, hsa-miR-195-5p, hsa-miR-424-5p, hsa-miR-497-5p
RP11-414J4.2	TAB3	hsa-miR-15a-5p, hsa-miR-15b-5p, hsa-miR-16-5p, hsa-miR-195-5p, hsa-miR-497-5p
RP11-414J4.2	RPS6KB1	hsa-miR-16-5p, hsa-miR-195-5p, hsa-miR-497-5p
RP11-414J4.2	RAF1	hsa-miR-16-5p, hsa-miR-195-5p, hsa-miR-497-5p
RP11-414J4.2	BCL2	hsa-miR-15a-5p, hsa-miR-15b-5p, hsa-miR-16-5p, hsa-miR-195-5p, hsa-miR-497-5p
RP11-400L8.2	BCL9	hsa-miR-30a-5p, hsa-miR-30b-5p, hsa-miR-30d-5p
RP11-395G23.3	HMGA1	hsa-miR-142-3p, hsa-miR-185-5p, hsa-miR-26a-5p, hsa-miR-296-5p
RP11-395G23.3	IL11	hsa-miR-1-3p, hsa-miR-204-5p, hsa-miR-211-5p
RP11-386G11.10	TDG	hsa-miR-29a-3p, hsa-miR-29b-3p, hsa-miR-29c-3p
RP11-386G11.10	MYB	hsa-miR-200b-3p, hsa-miR-200c-3p, hsa-miR-424-5p, hsa-miR-429
RP11-386G11.10	HMGCR	hsa-miR-29a-3p, hsa-miR-29b-3p, hsa-miR-29c-3p
RP11-386G11.10	PIN1	hsa-miR-200b-3p, hsa-miR-200c-3p, hsa-miR-874-3p
RP11-386G11.10	FGG	hsa-miR-29a-3p, hsa-miR-29b-3p, hsa-miR-29c-3p
RP11-384K6.6	SMAD7	hsa-miR-15b-5p, hsa-miR-424-5p, hsa-miR-497-5p
RP11-384K6.6	RECK	hsa-miR-15a-5p, hsa-miR-15b-5p, hsa-miR-16-5p
RP11-384K6.6	HIF1A	hsa-miR-107, hsa-miR-22-3p, hsa-miR-424-5p
RP11-384K6.6	AKT3	hsa-miR-15a-5p, hsa-miR-15b-5p, hsa-miR-16-5p
RP11-379I19.1	JAG1	hsa-miR-143-3p, hsa-miR-145-5p, hsa-miR-214-3p
RP11-359B12.2	CCND1	hsa-miR-101-3p, hsa-miR-16-5p, hsa-miR-200b-3p, hsa-miR-424-5p
RP11-359B12.2	MYB	hsa-miR-103a-3p, hsa-miR-107, hsa-miR-16-5p, hsa-miR-200b-3p, hsa-miR-200c-3p, hsa-miR-424-5p, hsa-miR-429
RP11-359B12.2	BMI1	hsa-miR-16-5p, hsa-miR-200b-3p, hsa-miR-200c-3p
RP11-359B12.2	ZFPM2	hsa-miR-200b-3p, hsa-miR-200c-3p, hsa-miR-429
RP11-359B12.2	ZEB2	hsa-miR-101-3p, hsa-miR-200b-3p, hsa-miR-200c-3p, hsa-miR-429
RP11-359B12.2	WDR37	hsa-miR-200b-3p, hsa-miR-200c-3p, hsa-miR-429
RP11-359B12.2	TCF7L1	hsa-miR-200b-3p, hsa-miR-200c-3p, hsa-miR-429
RP11-359B12.2	SUZ12	hsa-miR-101-3p, hsa-miR-200b-3p, hsa-miR-200c-3p
RP11-359B12.2	PTPRD	hsa-miR-200b-3p, hsa-miR-200c-3p, hsa-miR-429
RP11-359B12.2	KLHL20	hsa-miR-200b-3p, hsa-miR-200c-3p, hsa-miR-429
RP11-334C17.5	PTEN	hsa-miR-106a-5p, hsa-miR-106b-5p, hsa-miR-10a-5p, hsa-miR-10b-5p, hsa-miR-130a-3p, hsa-miR-130b-3p, hsa-miR-152-3p, hsa-miR-17-5p, hsa-miR-18a-5p, hsa-miR-200a-5p, hsa-miR-20a-5p, hsa-miR-20b-5p, hsa-miR-216a-5p, hsa-miR-25-3p, hsa-miR-301a-3p, hsa-miR-301b-3p, hsa-miR-302a-3p, hsa-miR-32-5p, hsa-miR-519d-3p, hsa-miR-92a-3p, hsa-miR-92b-3p, hsa-miR-93-5p
RP11-334C17.5	STAT5B	hsa-miR-134-5p, hsa-miR-150-5p, hsa-miR-182-3p
RP11-334C17.5	RBL2	hsa-miR-106a-5p, hsa-miR-106b-5p, hsa-miR-17-5p, hsa-miR-20a-5p
RP11-334C17.5	NANOG	hsa-miR-134-5p, hsa-miR-150-5p, hsa-miR-302a-3p, hsa-miR-34a-5p, hsa-miR-34c-5p
RP11-334C17.5	MAP3K12	hsa-miR-130a-3p, hsa-miR-17-5p, hsa-miR-20a-5p
RP11-334C17.5	JAK1	hsa-miR-106b-5p, hsa-miR-17-5p, hsa-miR-373-3p
RP11-334C17.5	DICER1	hsa-let-7a-5p, hsa-let-7c-5p, hsa-let-7d-5p, hsa-miR-130a-3p, hsa-miR-130b-3p, hsa-miR-18a-5p
RP11-334C17.5	BCL6	hsa-miR-10a-5p, hsa-miR-127-3p, hsa-miR-339-5p, hsa-miR-346
RP11-334C17.5	ARID4B	hsa-miR-106a-5p, hsa-miR-20b-5p, hsa-miR-92a-3p
RP11-316M1.12	EGR2	hsa-miR-17-5p, hsa-miR-20a-5p, hsa-miR-330-3p
RP11-316M1.12	MYC	hsa-miR-129-2-3p, hsa-miR-17-5p, hsa-miR-20a-5p, hsa-miR-320a, hsa-miR-320b, hsa-miR-378a-3p
RP11-316M1.12	ATG16L1	hsa-miR-106b-5p, hsa-miR-20a-5p, hsa-miR-93-5p
RP11-314C16.1	CCNE1	hsa-miR-103a-3p, hsa-miR-26a-5p, hsa-miR-26b-5p, hsa-miR-7-5p
RP11-314C16.1	MGMT	hsa-miR-181b-5p, hsa-miR-221-3p, hsa-miR-222-3p
RP11-310P5.1	ERBB2	hsa-miR-125a-5p, hsa-miR-125b-5p, hsa-miR-331-3p, hsa-miR-34a-5p
RP11-310P5.1	PIK3CG	hsa-miR-10a-5p, hsa-miR-125a-5p, hsa-miR-34a-5p
RP11-30K9.5	MPL	hsa-let-7c-5p, hsa-let-7e-5p, hsa-let-7f-5p
RP11-30K9.5	TIMP2	hsa-miR-106a-5p, hsa-miR-17-5p, hsa-miR-20a-5p, hsa-miR-301a-3p, hsa-miR-519d-3p
RP11-30K9.5	PPARA	hsa-miR-130a-3p, hsa-miR-130b-3p, hsa-miR-34a-5p, hsa-miR-519d-3p
RP11-30K9.5	PDGFRB	hsa-miR-34a-5p, hsa-miR-34c-5p, hsa-miR-449a, hsa-miR-449b-5p
RP11-30K9.5	NOTCH1	hsa-miR-296-5p, hsa-miR-34a-5p, hsa-miR-34c-5p, hsa-miR-449a
RP11-30K9.5	LIN28A	hsa-let-7b-5p, hsa-let-7e-5p, hsa-miR-370-3p
RP11-30J20.1	RUNX3	hsa-miR-130a-3p, hsa-miR-130b-3p, hsa-miR-301a-3p, hsa-miR-4295
RP11-30J20.1	DNMT1	hsa-miR-301b-3p, hsa-miR-30b-5p, hsa-miR-30c-5p
RP11-307C12.11	COPS6	hsa-let-7c-5p, hsa-let-7f-5p, hsa-let-7i-5p
RP11-307C12.11	WEE1	hsa-miR-128-3p, hsa-miR-27a-3p, hsa-miR-27b-3p
RP11-307C12.11	E2F2	hsa-let-7a-5p, hsa-let-7b-5p, hsa-miR-98-5p
RP11-307C12.11	E2F1	hsa-let-7a-5p, hsa-miR-330-3p, hsa-miR-34a-5p, hsa-miR-98-5p
RP11-307C12.11	CCNE2	hsa-miR-34a-5p, hsa-miR-34c-5p, hsa-miR-449a, hsa-miR-449b-5p
RP11-307C12.11	EZH2	hsa-let-7a-5p, hsa-let-7b-5p, hsa-let-7e-5p, hsa-miR-98-5p
RP11-29G8.3	MAPK9	hsa-miR-106a-5p, hsa-miR-106b-5p, hsa-miR-17-5p, hsa-miR-20a-5p, hsa-miR-20b-5p, hsa-miR-93-5p
RP11-29G8.3	MYB	hsa-miR-103a-3p, hsa-miR-106a-5p, hsa-miR-107, hsa-miR-15a-5p, hsa-miR-16-5p, hsa-miR-195-5p, hsa-miR-200b-3p, hsa-miR-200c-3p, hsa-miR-429
RP11-29G8.3	JAK2	hsa-miR-125a-5p, hsa-miR-125b-5p, hsa-miR-135a-5p
RP11-29G8.3	WDR37	hsa-miR-200b-3p, hsa-miR-200c-3p, hsa-miR-429
RP11-29G8.3	TAB3	hsa-miR-15a-5p, hsa-miR-15b-5p, hsa-miR-16-5p, hsa-miR-195-5p, hsa-miR-497-5p
RP11-29G8.3	SMAD7	hsa-miR-106b-5p, hsa-miR-15b-5p, hsa-miR-195-5p, hsa-miR-20a-5p, hsa-miR-497-5p, hsa-miR-519d-3p, hsa-miR-93-5p
RP11-29G8.3	SLC6A4	hsa-miR-135a-5p, hsa-miR-16-5p, hsa-miR-24-3p
RP11-29G8.3	ROCK2	hsa-miR-135a-5p, hsa-miR-200b-3p, hsa-miR-200c-3p
RP11-29G8.3	PTPRD	hsa-miR-135a-5p, hsa-miR-200b-3p, hsa-miR-200c-3p, hsa-miR-429
RP11-29G8.3	PHLPP2	hsa-miR-135a-5p, hsa-miR-20a-5p, hsa-miR-93-5p
RP11-29G8.3	MEF2D	hsa-miR-103a-3p, hsa-miR-17-5p, hsa-miR-18a-5p, hsa-miR-20a-5p
RP11-29G8.3	KLF11	hsa-miR-200b-3p, hsa-miR-200c-3p, hsa-miR-429
RP11-29G8.3	DICER1	hsa-miR-103a-3p, hsa-miR-107, hsa-miR-18a-5p, hsa-miR-192-5p, hsa-miR-195-5p, hsa-miR-200c-3p, hsa-miR-497-5p, hsa-miR-9-5p
RP11-29G8.3	BMPR2	hsa-miR-135a-5p, hsa-miR-17-5p, hsa-miR-20a-5p
RP11-290F5.2	SLC2A4	hsa-miR-106b-5p, hsa-miR-223-3p, hsa-miR-93-5p
RP11-290F5.2	HMGA2	hsa-miR-145-5p, hsa-miR-204-5p, hsa-miR-29b-3p, hsa-miR-370-3p, hsa-miR-490-3p
RP11-290F5.2	IL11	hsa-miR-204-5p, hsa-miR-211-5p, hsa-miR-30c-5p
RP11-290F5.2	FGA	hsa-miR-29a-3p, hsa-miR-29b-3p, hsa-miR-29c-3p
RP11-286B14.1	HMGA2	hsa-let-7a-5p, hsa-let-7b-5p, hsa-let-7f-5p, hsa-let-7g-5p, hsa-miR-145-5p
RP11-286B14.1	WNT1	hsa-let-7a-5p, hsa-miR-139-5p, hsa-miR-148b-3p
RP11-286B14.1	IGF2BP1	hsa-let-7a-5p, hsa-let-7b-5p, hsa-let-7g-5p
RP11-284N8.3	CHUK	hsa-miR-23a-3p, hsa-miR-23b-3p, hsa-miR-98-5p
RP11-284N8.3	MBNL3	hsa-miR-10b-5p, hsa-miR-30a-5p, hsa-miR-30b-5p, hsa-miR-30e-5p
RP11-284N8.3	TGFBR1	hsa-let-7b-5p, hsa-let-7c-5p, hsa-let-7g-5p
RP11-284N8.3	MYB	hsa-miR-200b-3p, hsa-miR-200c-3p, hsa-miR-429
RP11-284N8.3	E2F2	hsa-let-7a-5p, hsa-let-7b-5p, hsa-miR-98-5p
RP11-284N8.3	CCNE2	hsa-miR-200b-3p, hsa-miR-200c-3p, hsa-miR-30a-5p, hsa-miR-30b-5p
RP11-284N8.3	BMI1	hsa-let-7g-5p, hsa-miR-200b-3p, hsa-miR-200c-3p, hsa-miR-30e-5p
RP11-284N8.3	ZFPM2	hsa-miR-200b-3p, hsa-miR-200c-3p, hsa-miR-429
RP11-284N8.3	ZEB2	hsa-miR-200b-3p, hsa-miR-200c-3p, hsa-miR-429
RP11-284N8.3	WDR37	hsa-miR-200b-3p, hsa-miR-200c-3p, hsa-miR-429
RP11-284N8.3	PTPRD	hsa-miR-200b-3p, hsa-miR-200c-3p, hsa-miR-429
RP11-284N8.3	KRAS	hsa-let-7a-5p, hsa-let-7f-5p, hsa-let-7g-5p, hsa-miR-200c-3p
RP11-284N8.3	CRKL	hsa-miR-200b-3p, hsa-miR-200c-3p, hsa-miR-429
RP11-284N8.3	COPS8	hsa-let-7c-5p, hsa-let-7f-5p, hsa-let-7i-5p
RP11-268P4.4	KRAS	hsa-let-7a-5p, hsa-let-7f-5p, hsa-let-7g-5p
RP11-268P4.4	IGF1R	hsa-let-7a-5p, hsa-let-7b-5p, hsa-let-7e-5p
RP11-265N6.1	PKNOX1	hsa-miR-17-5p, hsa-miR-19a-3p, hsa-miR-19b-3p, hsa-miR-20a-5p
RP11-265N6.1	RHOC	hsa-miR-106b-5p, hsa-miR-493-5p, hsa-miR-93-5p
RP11-265N6.1	PPARG	hsa-miR-130a-3p, hsa-miR-130b-3p, hsa-miR-20a-5p, hsa-miR-20b-5p, hsa-miR-27a-3p, hsa-miR-27b-3p
RP11-265N6.1	CREB1	hsa-miR-27a-3p, hsa-miR-27b-3p, hsa-miR-582-5p
RP11-264B17.3	LIN28A	hsa-let-7a-5p, hsa-let-7b-5p, hsa-let-7e-5p
RP11-264B17.3	KRAS	hsa-let-7a-5p, hsa-let-7f-5p, hsa-let-7g-5p
RP11-264B17.3	IGF1R	hsa-let-7a-5p, hsa-let-7b-5p, hsa-let-7e-5p
RP11-263K19.4	CCND2	hsa-let-7a-5p, hsa-let-7b-5p, hsa-miR-98-5p
RP11-253I19.3	IGF1R	hsa-miR-141-3p, hsa-miR-143-3p, hsa-miR-26b-5p
RP11-253E3.3	AURKB	hsa-let-7a-5p, hsa-let-7e-5p, hsa-let-7i-5p
RP11-253E3.3	LIN28A	hsa-let-7a-5p, hsa-let-7b-5p, hsa-let-7e-5p
RP11-253E3.3	DICER1	hsa-let-7a-5p, hsa-let-7c-5p, hsa-let-7d-5p, hsa-miR-154-5p
RP11-250B2.3	EGFR	hsa-miR-128-3p, hsa-miR-27a-3p, hsa-miR-27b-3p
RP11-250B2.3	MTOR	hsa-miR-128-3p, hsa-miR-144-3p, hsa-miR-199a-3p
RP11-248G5.8	CCND1	hsa-miR-135a-5p, hsa-miR-19a-3p, hsa-miR-24-3p, hsa-miR-34a-5p, hsa-miR-34c-5p, hsa-miR-9-5p
RP11-248G5.8	FOXO1	hsa-miR-135a-5p, hsa-miR-186-5p, hsa-miR-486-5p, hsa-miR-9-5p
RP11-248G5.8	NOTCH1	hsa-miR-24-3p, hsa-miR-34a-5p, hsa-miR-34c-5p, hsa-miR-9-5p
RP11-248G5.8	MYCN	hsa-miR-19a-3p, hsa-miR-19b-3p, hsa-miR-34a-5p, hsa-miR-34c-5p
RP11-248G5.8	CDK6	hsa-miR-214-5p, hsa-miR-34a-5p, hsa-miR-34c-5p
RP11-228B15.4	PRDM1	hsa-let-7a-5p, hsa-let-7b-5p, hsa-let-7f-5p
RP11-228B15.4	LIN28A	hsa-let-7a-5p, hsa-let-7b-5p, hsa-let-7e-5p
RP11-228B15.4	IGF1R	hsa-let-7a-5p, hsa-let-7b-5p, hsa-let-7e-5p
RP11-197N18.2	EGFR	hsa-miR-125a-5p, hsa-miR-125b-5p, hsa-miR-218-5p, hsa-miR-7-5p
RP11-197N18.2	E2F6	hsa-miR-151a-5p, hsa-miR-193a-3p, hsa-miR-28-5p
RP11-179B15.5	CHUK	hsa-miR-15a-5p, hsa-miR-15b-5p, hsa-miR-16-5p, hsa-miR-195-5p
RP11-179B15.5	CCND1	hsa-miR-15a-5p, hsa-miR-15b-5p, hsa-miR-16-5p, hsa-miR-195-5p, hsa-miR-374a-5p, hsa-miR-424-5p, hsa-miR-497-5p
RP11-179B15.5	MYB	hsa-miR-103a-3p, hsa-miR-107, hsa-miR-15a-5p, hsa-miR-16-5p, hsa-miR-195-5p, hsa-miR-424-5p
RP11-179B15.5	BACE1	hsa-miR-107, hsa-miR-15a-5p, hsa-miR-16-5p
RP11-179B15.5	TAB3	hsa-miR-15a-5p, hsa-miR-15b-5p, hsa-miR-16-5p, hsa-miR-195-5p, hsa-miR-497-5p
RP11-179B15.5	SMAD7	hsa-miR-15b-5p, hsa-miR-195-5p, hsa-miR-424-5p, hsa-miR-497-5p
RP11-179B15.5	RPS6KB1	hsa-miR-16-5p, hsa-miR-195-5p, hsa-miR-497-5p
RP11-179B15.5	RECK	hsa-miR-15a-5p, hsa-miR-15b-5p, hsa-miR-16-5p, hsa-miR-374b-5p
RP11-179B15.5	RAF1	hsa-miR-16-5p, hsa-miR-195-5p, hsa-miR-497-5p
RP11-179B15.5	PURA	hsa-miR-15a-5p, hsa-miR-15b-5p, hsa-miR-16-5p
RP11-179B15.5	BCL2	hsa-miR-15a-5p, hsa-miR-15b-5p, hsa-miR-16-5p, hsa-miR-195-5p, hsa-miR-497-5p
RP11-179B15.5	ACTB	hsa-miR-15a-5p, hsa-miR-15b-5p, hsa-miR-16-5p, hsa-miR-497-5p
RP11-175O19.4	CXCL12	hsa-miR-137, hsa-miR-221-3p, hsa-miR-23a-3p, hsa-miR-27b-3p, hsa-miR-31-5p, hsa-miR-448
RP11-175O19.4	MPL	hsa-let-7a-5p, hsa-let-7d-5p, hsa-let-7f-5p, hsa-miR-151a-5p, hsa-miR-28-5p
RP11-175O19.4	MAP2K1	hsa-miR-181a-5p, hsa-miR-181b-5p, hsa-miR-34a-5p, hsa-miR-34b-3p, hsa-miR-34c-5p, hsa-miR-448, hsa-miR-449a
RP11-175O19.4	GNAI1	hsa-miR-320a, hsa-miR-320c, hsa-miR-320d, hsa-miR-9-3p
RP11-175O19.4	E2F1	hsa-let-7a-5p, hsa-miR-122-5p, hsa-miR-17-5p, hsa-miR-181b-5p, hsa-miR-330-3p, hsa-miR-342-3p, hsa-miR-34a-5p, hsa-miR-93-5p, hsa-miR-9-3p
RP11-175O19.4	BECN1	hsa-miR-216b-5p, hsa-miR-221-3p, hsa-miR-30a-5p, hsa-miR-30b-5p, hsa-miR-30c-5p, hsa-miR-30d-5p, hsa-miR-34a-5p
RP11-175O19.4	ALCAM	hsa-miR-148a-3p, hsa-miR-148b-3p, hsa-miR-192-5p, hsa-miR-215-5p
RP11-175O19.4	PDGFRB	hsa-miR-30b-5p, hsa-miR-34a-5p, hsa-miR-34c-5p, hsa-miR-449a, hsa-miR-449b-5p
RP11-175O19.4	PDGFRA	hsa-let-7b-5p, hsa-miR-140-5p, hsa-miR-34a-5p, hsa-miR-34c-5p, hsa-miR-449a, hsa-miR-449b-5p
RP11-175O19.4	PARP1	hsa-let-7a-5p, hsa-miR-216b-5p, hsa-miR-335-5p, hsa-miR-708-5p
RP11-175O19.4	NOVA1	hsa-miR-155-5p, hsa-miR-338-3p, hsa-miR-339-5p
RP11-175O19.4	MBNL1	hsa-miR-30a-5p, hsa-miR-30b-5p, hsa-miR-30e-5p
RP11-175O19.4	MAP4K4	hsa-let-7a-5p, hsa-miR-302c-5p, hsa-miR-30d-5p, hsa-miR-31-5p
RP11-175O19.4	GATA6	hsa-miR-181a-5p, hsa-miR-181b-5p, hsa-miR-181c-5p
RP11-175O19.4	DICER1	hsa-let-7a-5p, hsa-let-7d-5p, hsa-miR-103a-3p, hsa-miR-107, hsa-miR-192-5p, hsa-miR-221-3p, hsa-miR-374a-5p, hsa-miR-3928-3p
RP11-175O19.4	CREB1	hsa-miR-103a-3p, hsa-miR-1224-5p, hsa-miR-122-5p, hsa-miR-150-5p, hsa-miR-181b-5p, hsa-miR-27a-3p, hsa-miR-27b-3p, hsa-miR-34b-3p
RP11-175O19.4	BCL9	hsa-miR-30a-5p, hsa-miR-30b-5p, hsa-miR-30c-5p, hsa-miR-30d-5p
RP11-175O19.4	APAF1	hsa-miR-155-5p, hsa-miR-221-3p, hsa-miR-23a-3p, hsa-miR-23a-5p
RP11-175O19.4	ADAM10	hsa-miR-103a-3p, hsa-miR-122-5p, hsa-miR-448, hsa-miR-449a
RP11-175O19.4	ACVR1	hsa-let-7b-5p, hsa-miR-148a-3p, hsa-miR-148b-3p, hsa-miR-30c-5p, hsa-miR-365a-3p
RP11-173P15.3	AR	hsa-miR-185-5p, hsa-miR-205-5p, hsa-miR-34a-5p
RP11-173P15.3	MMP2	hsa-miR-106b-5p, hsa-miR-143-3p, hsa-miR-17-5p, hsa-miR-29b-3p, hsa-miR-338-3p, hsa-miR-377-3p
RP11-173P15.3	PAK4	hsa-miR-199a-3p, hsa-miR-199b-3p, hsa-miR-22-3p
RP11-173P15.3	MMP9	hsa-miR-132-3p, hsa-miR-143-3p, hsa-miR-29b-3p, hsa-miR-338-3p, hsa-miR-377-3p
RP11-173P15.3	VIM	hsa-miR-129-5p, hsa-miR-132-3p, hsa-miR-196a-5p, hsa-miR-29b-3p, hsa-miR-34a-5p
RP11-173P15.3	TGFBR2	hsa-miR-106a-5p, hsa-miR-17-5p, hsa-miR-196a-5p, hsa-miR-196b-5p, hsa-miR-20a-5p, hsa-miR-21-5p, hsa-miR-373-3p, hsa-miR-590-5p
RP11-173P15.3	SIRPA	hsa-miR-106a-5p, hsa-miR-17-5p, hsa-miR-20a-5p
RP11-173P15.3	SCARB1	hsa-miR-143-3p, hsa-miR-185-5p, hsa-miR-96-5p
RP11-173P15.3	LIMK1	hsa-miR-106a-5p, hsa-miR-143-3p, hsa-miR-17-5p, hsa-miR-20a-5p, hsa-miR-20b-5p
RP11-173P15.3	LEF1	hsa-miR-34a-5p, hsa-miR-449a, hsa-miR-452-5p
RP11-173P15.3	ICAM1	hsa-miR-17-5p, hsa-miR-21-5p, hsa-miR-296-3p, hsa-miR-31-5p
RP11-173P15.3	FOXO1	hsa-miR-132-3p, hsa-miR-182-5p, hsa-miR-186-5p, hsa-miR-196a-5p, hsa-miR-21-5p, hsa-miR-96-5p
RP11-173P15.3	ERBB2	hsa-miR-193a-5p, hsa-miR-205-5p, hsa-miR-21-5p, hsa-miR-22-3p, hsa-miR-34a-5p
RP11-173P15.3	TJP1	hsa-miR-212-3p, hsa-miR-212-5p, hsa-miR-34a-5p, hsa-miR-34c-5p
RP11-173P15.3	TIMP2	hsa-miR-106a-5p, hsa-miR-17-5p, hsa-miR-20a-5p
RP11-173P15.3	STAT3	hsa-miR-106a-5p, hsa-miR-106b-5p, hsa-miR-17-5p, hsa-miR-20a-5p, hsa-miR-20b-5p, hsa-miR-21-5p, hsa-miR-29b-3p
RP11-173P15.3	SPRED1	hsa-miR-132-3p, hsa-miR-1-3p, hsa-miR-31-5p
RP11-173P15.3	SP1	hsa-miR-129-5p, hsa-miR-1-3p, hsa-miR-21-5p, hsa-miR-22-3p, hsa-miR-29b-3p, hsa-miR-330-3p
RP11-173P15.3	SOX2	hsa-miR-21-5p, hsa-miR-34a-5p, hsa-miR-34c-5p, hsa-miR-371a-5p
RP11-173P15.3	RB1	hsa-miR-106a-5p, hsa-miR-106b-5p, hsa-miR-132-3p, hsa-miR-17-5p, hsa-miR-182-5p, hsa-miR-20a-5p, hsa-miR-212-3p, hsa-miR-590-5p
RP11-173P15.3	RASA1	hsa-miR-132-3p, hsa-miR-21-5p, hsa-miR-31-5p
RP11-173P15.3	PIK3CG	hsa-miR-196b-5p, hsa-miR-29b-3p, hsa-miR-34a-5p, hsa-miR-7-5p
RP11-173P15.3	PDGFRB	hsa-miR-29b-3p, hsa-miR-34a-5p, hsa-miR-34c-5p, hsa-miR-449a, hsa-miR-449b-5p
RP11-173P15.3	NOTCH1	hsa-miR-129-5p, hsa-miR-144-3p, hsa-miR-34a-5p, hsa-miR-34c-5p, hsa-miR-449a
RP11-173P15.3	MTOR	hsa-miR-144-3p, hsa-miR-193a-5p, hsa-miR-196b-5p, hsa-miR-199a-3p, hsa-miR-373-3p
RP11-173P15.3	MFN2	hsa-miR-106a-5p, hsa-miR-106b-5p, hsa-miR-17-5p
RP11-173P15.3	JAK1	hsa-miR-106b-5p, hsa-miR-17-5p, hsa-miR-373-3p
RP11-173P15.3	HIF1A	hsa-miR-106a-5p, hsa-miR-106b-5p, hsa-miR-17-5p, hsa-miR-186-5p, hsa-miR-20a-5p, hsa-miR-20b-5p, hsa-miR-210-3p, hsa-miR-22-3p, hsa-miR-338-3p
RP11-173P15.3	FN1	hsa-miR-132-3p, hsa-miR-1-3p, hsa-miR-206, hsa-miR-29b-3p
RP11-173P15.3	ETS1	hsa-miR-1-3p, hsa-miR-144-3p, hsa-miR-208a-3p, hsa-miR-31-5p, hsa-miR-499a-5p
RP11-173P15.3	EPAS1	hsa-miR-17-5p, hsa-miR-185-5p, hsa-miR-20a-5p
RP11-173P15.3	DNMT1	hsa-miR-17-5p, hsa-miR-185-5p, hsa-miR-20a-5p, hsa-miR-29b-3p, hsa-miR-377-3p
RP11-173P15.3	CREB5	hsa-miR-182-5p, hsa-miR-449a, hsa-miR-590-5p
RP11-173P15.3	COL4A1	hsa-miR-17-5p, hsa-miR-20a-5p, hsa-miR-21-5p, hsa-miR-29b-3p
RP11-173P15.3	COL1A1	hsa-miR-129-5p, hsa-miR-143-3p, hsa-miR-185-5p, hsa-miR-29b-3p
RP11-173P15.3	CD44	hsa-miR-143-3p, hsa-miR-199a-3p, hsa-miR-330-3p, hsa-miR-34a-5p, hsa-miR-373-3p
RP11-173P15.3	CCND2	hsa-miR-106b-5p, hsa-miR-17-5p, hsa-miR-182-5p, hsa-miR-206, hsa-miR-20a-5p, hsa-miR-29b-3p
RP11-173P15.3	APP	hsa-miR-106a-5p, hsa-miR-106b-5p, hsa-miR-144-3p, hsa-miR-17-5p, hsa-miR-20a-5p
RP11-173P15.3	ADAR	hsa-miR-1-3p, hsa-miR-17-5p, hsa-miR-20a-5p
RP11-158K1.3	PTEN	hsa-miR-128-3p, hsa-miR-130a-5p, hsa-miR-155-5p, hsa-miR-23a-3p, hsa-miR-23b-3p
RP11-158K1.3	VHL	hsa-miR-101-3p, hsa-miR-155-5p, hsa-miR-23b-3p
RP11-158K1.3	SMAD2	hsa-miR-128-3p, hsa-miR-155-5p, hsa-miR-323a-3p
RP11-148B6.1	FOXO1	hsa-miR-135a-5p, hsa-miR-135b-5p, hsa-miR-200c-3p, hsa-miR-27b-3p
RP11-148B6.1	VEGFA	hsa-miR-200c-3p, hsa-miR-23b-3p, hsa-miR-27b-3p
RP11-148B6.1	NOTCH1	hsa-miR-200c-3p, hsa-miR-23b-3p, hsa-miR-27b-3p
RP11-148B6.1	BMPR2	hsa-miR-135a-5p, hsa-miR-135b-5p, hsa-miR-92a-3p
RP11-121C2.2	CCND1	hsa-let-7b-5p, hsa-let-7e-5p, hsa-let-7f-5p, hsa-miR-106a-5p, hsa-miR-24-3p, hsa-miR-365a-3p
RP11-121C2.2	SMAD4	hsa-miR-125a-5p, hsa-miR-125b-5p, hsa-miR-1260b, hsa-miR-26a-5p
RP11-121C2.2	RB1	hsa-let-7a-5p, hsa-miR-106a-5p, hsa-miR-26a-5p
RP11-121C2.2	NTRK3	hsa-miR-125a-5p, hsa-miR-125b-5p, hsa-miR-485-3p
RP11-121C2.2	MCL1	hsa-miR-106a-5p, hsa-miR-125a-5p, hsa-miR-125b-5p, hsa-miR-26a-5p
RP11-121C2.2	MAPK1	hsa-let-7a-5p, hsa-let-7b-5p, hsa-miR-9-3p
RP11-121C2.2	KRAS	hsa-let-7a-5p, hsa-let-7f-5p, hsa-let-7g-5p, hsa-miR-365a-3p
RP11-119K6.6	CDK4	hsa-miR-34b-5p, hsa-miR-34c-5p, hsa-miR-449b-5p
RP11-119K6.6	CCNE2	hsa-miR-34b-5p, hsa-miR-34c-5p, hsa-miR-449b-5p
RP11-119K6.6	MYCN	hsa-miR-34b-5p, hsa-miR-34c-5p, hsa-miR-449b-5p
RP11-115D19.1	HMGA1	hsa-miR-15a-5p, hsa-miR-16-5p, hsa-miR-195-5p
RP11-115D19.1	IL11	hsa-miR-1-3p, hsa-miR-204-5p, hsa-miR-211-5p, hsa-miR-379-5p
RP11-111K18.2	SIRT1	hsa-miR-181a-5p, hsa-miR-181b-5p, hsa-miR-181c-5p
RP11-111K18.2	KRAS	hsa-miR-181a-5p, hsa-miR-181c-5p, hsa-miR-27a-3p
RP11-111K18.2	CREB1	hsa-miR-181b-5p, hsa-miR-27a-3p, hsa-miR-27b-3p
RP11-111K18.2	BCL2	hsa-miR-181a-5p, hsa-miR-181b-5p, hsa-miR-181c-5p
RP11-1100L3.8	TCEAL1	hsa-miR-106b-5p, hsa-miR-17-5p, hsa-miR-20a-5p
RP11-1100L3.8	RHOC	hsa-miR-106b-5p, hsa-miR-302b-3p, hsa-miR-372-3p
RP11-1100L3.8	FGG	hsa-miR-29a-3p, hsa-miR-29b-3p, hsa-miR-29c-3p
RP11-10N23.4	RBFOX2	hsa-miR-320a, hsa-miR-320b, hsa-miR-320d
RP11-10J21.4	MAP2K1	hsa-miR-34a-5p, hsa-miR-34c-5p, hsa-miR-449a
RP11-10J21.4	SIRT1	hsa-miR-138-5p, hsa-miR-34a-5p, hsa-miR-449a, hsa-miR-449b-5p
RP11-10J21.4	NOTCH1	hsa-miR-24-3p, hsa-miR-30a-5p, hsa-miR-30c-5p, hsa-miR-30d-5p, hsa-miR-30e-5p, hsa-miR-34a-5p, hsa-miR-34c-5p, hsa-miR-449a
RP11-10J21.4	IGF1R	hsa-miR-138-5p, hsa-miR-143-3p, hsa-miR-185-5p, hsa-miR-376a-3p
RP11-10J21.4	E2F3	hsa-miR-34a-5p, hsa-miR-34c-5p, hsa-miR-449a
RP11-10J21.4	DNMT1	hsa-miR-185-5p, hsa-miR-30a-5p, hsa-miR-30c-5p
RP11-10J21.4	BCL9	hsa-miR-30a-5p, hsa-miR-30c-5p, hsa-miR-30d-5p
RNF219-AS1	CHUK	hsa-miR-15a-5p, hsa-miR-15b-5p, hsa-miR-16-5p, hsa-miR-195-5p
RNF219-AS1	BMI1	hsa-miR-15a-5p, hsa-miR-16-5p, hsa-miR-708-5p
RNF219-AS1	RPS6KB1	hsa-miR-16-5p, hsa-miR-195-5p, hsa-miR-382-5p, hsa-miR-497-5p
RNF219-AS1	PURA	hsa-miR-15a-5p, hsa-miR-15b-5p, hsa-miR-16-5p
RNF219-AS1	CDC42	hsa-miR-107, hsa-miR-195-5p, hsa-miR-216a-5p
RNF219-AS1	BCL2	hsa-miR-153-3p, hsa-miR-15a-5p, hsa-miR-15b-5p, hsa-miR-16-5p, hsa-miR-195-5p, hsa-miR-497-5p, hsa-miR-708-5p
RNF219-AS1	AXIN2	hsa-miR-107, hsa-miR-15b-5p, hsa-miR-16-5p
RNF219-AS1	AKT3	hsa-miR-15a-5p, hsa-miR-15b-5p, hsa-miR-16-5p
RMST	EGFR	hsa-let-7a-5p, hsa-miR-132-3p, hsa-miR-135a-5p, hsa-miR-27a-3p, hsa-miR-27b-3p
RMST	YAP1	hsa-miR-15a-5p, hsa-miR-16-5p, hsa-miR-195-5p, hsa-miR-27a-3p
RMST	AKT3	hsa-miR-15a-5p, hsa-miR-15b-5p, hsa-miR-16-5p
RFPL1S	PAK1	hsa-let-7a-5p, hsa-miR-145-5p, hsa-miR-7-5p
RFPL1S	MAP3K9	hsa-miR-148b-3p, hsa-miR-24-3p, hsa-miR-34a-5p
RFPL1S	KRAS	hsa-let-7a-5p, hsa-let-7f-5p, hsa-let-7g-5p, hsa-miR-1-3p, hsa-miR-143-3p, hsa-miR-181a-5p, hsa-miR-27a-3p
RFPL1S	CPEB4	hsa-let-7b-5p, hsa-miR-145-5p, hsa-miR-26a-5p
RBM26-AS1	RB1	hsa-let-7a-5p, hsa-miR-106a-5p, hsa-miR-182-5p, hsa-miR-26a-5p
RASSF8-AS1	WEE1	hsa-miR-106b-5p, hsa-miR-17-5p, hsa-miR-20a-5p, hsa-miR-27a-3p, hsa-miR-27b-3p
RASSF8-AS1	PSAP	hsa-miR-24-3p, hsa-miR-27a-3p, hsa-miR-27b-3p
RASSF8-AS1	ICAM1	hsa-miR-17-3p, hsa-miR-17-5p, hsa-miR-296-3p
RASSF8-AS1	DAZAP2	hsa-miR-106b-5p, hsa-miR-17-3p, hsa-miR-17-5p, hsa-miR-18a-5p, hsa-miR-20a-5p, hsa-miR-93-5p
RASSF8-AS1	XIAP	hsa-miR-192-5p, hsa-miR-215-5p, hsa-miR-24-3p, hsa-miR-33b-5p, hsa-miR-7-5p
RASSF8-AS1	WNK1	hsa-miR-192-5p, hsa-miR-215-5p, hsa-miR-27a-3p
RASSF8-AS1	RBL2	hsa-miR-106a-5p, hsa-miR-106b-5p, hsa-miR-17-5p, hsa-miR-20a-5p
RASSF8-AS1	LY75	hsa-miR-106b-5p, hsa-miR-17-3p, hsa-miR-17-5p, hsa-miR-18a-5p, hsa-miR-20a-5p, hsa-miR-93-5p
RASSF8-AS1	KAT2B	hsa-miR-106b-5p, hsa-miR-17-5p, hsa-miR-93-5p
RASSF8-AS1	ITGB8	hsa-miR-17-5p, hsa-miR-20a-5p, hsa-miR-93-5p
RAB30-AS1	ZEB2	hsa-miR-101-3p, hsa-miR-590-3p, hsa-miR-708-5p
PXN-AS1	AURKB	hsa-let-7a-5p, hsa-let-7e-5p, hsa-let-7i-5p
PXN-AS1	EZH2	hsa-let-7a-5p, hsa-let-7b-5p, hsa-let-7e-5p
PWAR6	MAPK9	hsa-miR-17-5p, hsa-miR-20b-5p, hsa-miR-93-5p
PWAR6	KIT	hsa-miR-19a-3p, hsa-miR-218-5p, hsa-miR-221-3p, hsa-miR-34a-5p
PWAR6	STMN1	hsa-miR-101-3p, hsa-miR-221-3p, hsa-miR-34a-5p, hsa-miR-9-5p
PWAR6	CDK8	hsa-miR-101-3p, hsa-miR-195-5p, hsa-miR-26a-5p
PWAR6	BMI1	hsa-miR-139-5p, hsa-miR-15a-5p, hsa-miR-16-5p, hsa-miR-218-5p
PWAR6	TET2	hsa-miR-101-3p, hsa-miR-125b-5p, hsa-miR-26a-5p, hsa-miR-29b-3p, hsa-miR-7-5p
PWAR6	SOX6	hsa-miR-132-3p, hsa-miR-1-3p, hsa-miR-16-5p
PWAR6	SOX5	hsa-miR-132-3p, hsa-miR-15a-5p, hsa-miR-16-5p
PWAR6	SMAD2	hsa-miR-125a-5p, hsa-miR-132-3p, hsa-miR-145-5p, hsa-miR-15b-5p, hsa-miR-425-5p, hsa-miR-484
PWAR6	SIRT1	hsa-miR-124-3p, hsa-miR-132-3p, hsa-miR-221-3p, hsa-miR-34a-5p, hsa-miR-9-5p
PWAR6	RPS6KB1	hsa-miR-145-5p, hsa-miR-16-5p, hsa-miR-195-5p, hsa-miR-218-5p, hsa-miR-382-5p
PWAR6	RICTOR	hsa-miR-16-5p, hsa-miR-218-5p, hsa-miR-34a-5p
PWAR6	PURA	hsa-miR-15a-5p, hsa-miR-15b-5p, hsa-miR-16-5p, hsa-miR-93-5p
PWAR6	PPM1D	hsa-miR-145-5p, hsa-miR-15b-5p, hsa-miR-16-5p
PWAR6	PHLPP1	hsa-miR-15a-5p, hsa-miR-17-5p, hsa-miR-19a-3p
PWAR6	NTRK3	hsa-miR-125a-5p, hsa-miR-125b-5p, hsa-miR-185-5p, hsa-miR-9-5p
PWAR6	MYCN	hsa-miR-101-3p, hsa-miR-19a-3p, hsa-miR-19b-3p, hsa-miR-29b-3p, hsa-miR-34a-5p
PWAR6	MAPK1	hsa-miR-126-5p, hsa-miR-132-3p, hsa-miR-17-5p, hsa-miR-9-3p
PWAR6	KAT2B	hsa-miR-17-5p, hsa-miR-19a-3p, hsa-miR-19b-3p, hsa-miR-93-5p
PWAR6	IGF1R	hsa-miR-125b-5p, hsa-miR-139-5p, hsa-miR-143-3p, hsa-miR-145-5p, hsa-miR-16-5p, hsa-miR-185-5p, hsa-miR-7-5p
PWAR6	HDAC4	hsa-miR-125a-5p, hsa-miR-1-3p, hsa-miR-29b-3p, hsa-miR-30c-5p, hsa-miR-9-5p
PWAR6	ELAVL1	hsa-miR-125a-5p, hsa-miR-29b-3p, hsa-miR-9-5p
PWAR6	CUL5	hsa-miR-19a-3p, hsa-miR-19b-3p, hsa-miR-7-5p
PWAR6	CDC42	hsa-miR-185-5p, hsa-miR-195-5p, hsa-miR-29b-3p, hsa-miR-30c-5p
PWAR6	CCND2	hsa-miR-124-3p, hsa-miR-15a-5p, hsa-miR-16-5p, hsa-miR-17-5p, hsa-miR-26a-5p, hsa-miR-29b-3p, hsa-miR-30c-5p
PWAR6	BMPR2	hsa-miR-135a-5p, hsa-miR-17-5p, hsa-miR-19a-3p, hsa-miR-19b-3p
PWAR6	AXIN2	hsa-miR-15b-5p, hsa-miR-16-5p, hsa-miR-34a-5p
PWAR6	AKT3	hsa-miR-15a-5p, hsa-miR-15b-5p, hsa-miR-16-5p, hsa-miR-20b-5p, hsa-miR-29b-3p
PVT1	TP53	hsa-miR-15a-5p, hsa-miR-16-5p, hsa-miR-205-5p, hsa-miR-24-3p, hsa-miR-27a-3p, hsa-miR-29b-3p, hsa-miR-29c-3p
PVT1	WEE1	hsa-miR-15a-5p, hsa-miR-15b-5p, hsa-miR-16-5p, hsa-miR-195-5p, hsa-miR-27a-3p, hsa-miR-27b-3p, hsa-miR-424-5p, hsa-miR-497-5p, hsa-miR-503-5p
PVT1	GAPDH	hsa-miR-29a-3p, hsa-miR-29b-3p, hsa-miR-29c-3p
PVT1	FSCN1	hsa-miR-200b-3p, hsa-miR-24-3p, hsa-miR-429
PVT1	TNFAIP3	hsa-miR-29a-3p, hsa-miR-29b-3p, hsa-miR-29c-3p
PVT1	RAD51	hsa-miR-103a-3p, hsa-miR-107, hsa-miR-96-5p
PVT1	NCSTN	hsa-miR-16-5p, hsa-miR-186-5p, hsa-miR-24-3p
PVT1	LOX	hsa-miR-200b-3p, hsa-miR-29a-3p, hsa-miR-29b-3p, hsa-miR-29c-3p
PVT1	ITGA5	hsa-miR-148a-3p, hsa-miR-148b-3p, hsa-miR-17-3p, hsa-miR-205-5p
PVT1	HMGA1	hsa-miR-15a-5p, hsa-miR-16-5p, hsa-miR-195-5p
PVT1	DLC1	hsa-miR-200b-3p, hsa-miR-200c-3p, hsa-miR-429
PVT1	COL5A2	hsa-miR-29a-3p, hsa-miR-29b-3p, hsa-miR-29c-3p
PVT1	CHEK1	hsa-miR-15a-5p, hsa-miR-15b-5p, hsa-miR-16-5p, hsa-miR-195-5p, hsa-miR-24-3p, hsa-miR-424-5p, hsa-miR-497-5p, hsa-miR-503-5p
PVT1	CDK2	hsa-miR-103a-3p, hsa-miR-200c-3p, hsa-miR-29a-3p, hsa-miR-302a-3p
PVT1	ADAM12	hsa-miR-200b-3p, hsa-miR-200c-3p, hsa-miR-29a-3p, hsa-miR-29b-3p, hsa-miR-29c-3p
PVT1	SERPINH1	hsa-miR-29a-3p, hsa-miR-29b-3p, hsa-miR-29c-3p
PVT1	LAMC1	hsa-miR-205-5p, hsa-miR-29b-3p, hsa-miR-29c-3p
PVT1	FGFR1	hsa-miR-16-5p, hsa-miR-424-5p, hsa-miR-503-5p
PVT1	DNMT3B	hsa-miR-148a-3p, hsa-miR-200b-3p, hsa-miR-200c-3p, hsa-miR-29a-3p, hsa-miR-29b-3p, hsa-miR-29c-3p
PVT1	COL4A2	hsa-miR-29a-3p, hsa-miR-29b-3p, hsa-miR-29c-3p
PVT1	COL4A1	hsa-miR-29a-3p, hsa-miR-29b-3p, hsa-miR-29c-3p
PVT1	COL3A1	hsa-miR-29a-3p, hsa-miR-29b-3p, hsa-miR-29c-3p
PVT1	CDKN1A	hsa-miR-15a-5p, hsa-miR-16-5p, hsa-miR-17-3p, hsa-miR-29b-3p, hsa-miR-302a-3p, hsa-miR-503-5p, hsa-miR-96-5p
PVT1	CDK6	hsa-miR-103a-3p, hsa-miR-107, hsa-miR-16-5p, hsa-miR-195-5p, hsa-miR-29a-3p, hsa-miR-29b-3p, hsa-miR-29c-3p, hsa-miR-424-5p, hsa-miR-497-5p
PVT1	BIRC5	hsa-miR-16-5p, hsa-miR-195-5p, hsa-miR-335-5p, hsa-miR-497-5p
PTPRD-AS1	AKT3	hsa-miR-15a-5p, hsa-miR-15b-5p, hsa-miR-16-5p
PSMG3-AS1	YAP1	hsa-miR-15a-5p, hsa-miR-16-5p, hsa-miR-195-5p
PSMD6-AS2	ROCK1	hsa-miR-130a-3p, hsa-miR-148a-3p, hsa-miR-148b-3p
PSMD6-AS2	BCL2L11	hsa-miR-148a-3p, hsa-miR-301a-3p, hsa-miR-301b-3p
PSMD5-AS1	TP53INP1	hsa-miR-125b-5p, hsa-miR-142-5p, hsa-miR-17-5p, hsa-miR-20a-5p, hsa-miR-93-5p
PSMD5-AS1	SOX5	hsa-miR-132-3p, hsa-miR-15a-5p, hsa-miR-16-5p
PSMD5-AS1	RPS6KB1	hsa-miR-122-5p, hsa-miR-16-5p, hsa-miR-195-5p, hsa-miR-218-5p, hsa-miR-497-5p
PSMD5-AS1	RBL2	hsa-miR-106a-5p, hsa-miR-106b-5p, hsa-miR-17-5p, hsa-miR-20a-5p
PSMD5-AS1	RAF1	hsa-miR-125a-5p, hsa-miR-125b-5p, hsa-miR-132-3p, hsa-miR-16-5p, hsa-miR-195-5p, hsa-miR-497-5p
PSMD5-AS1	NFIA	hsa-miR-107, hsa-miR-181b-5p, hsa-miR-424-5p
PSMD5-AS1	MEF2D	hsa-miR-103a-3p, hsa-miR-122-5p, hsa-miR-17-5p, hsa-miR-20a-5p
PSMD5-AS1	JAK1	hsa-miR-106b-5p, hsa-miR-107, hsa-miR-17-5p
PSMD5-AS1	HDAC4	hsa-miR-125a-5p, hsa-miR-140-5p, hsa-miR-9-5p
PSMD5-AS1	AXIN2	hsa-miR-107, hsa-miR-15b-5p, hsa-miR-16-5p, hsa-miR-34a-5p
PRIM2	BACH1	hsa-miR-106b-5p, hsa-miR-17-5p, hsa-miR-20a-5p, hsa-miR-93-5p
PRIM2	PELI1	hsa-miR-106b-5p, hsa-miR-17-5p, hsa-miR-20a-5p, hsa-miR-93-5p
PRIM2	E2F1	hsa-miR-106a-5p, hsa-miR-106b-5p, hsa-miR-17-5p, hsa-miR-20a-5p, hsa-miR-519d-3p, hsa-miR-93-5p
PRIM2	RBL1	hsa-miR-106b-5p, hsa-miR-17-5p, hsa-miR-20a-5p
PRIM2	E2F3	hsa-miR-106b-5p, hsa-miR-17-5p, hsa-miR-20a-5p
PRIM2	ATG16L1	hsa-miR-106b-5p, hsa-miR-20a-5p, hsa-miR-93-5p
POU6F2-AS2	MYCN	hsa-miR-19a-3p, hsa-miR-19b-3p, hsa-miR-542-3p
PKI55	KIT	hsa-miR-137, hsa-miR-19a-3p, hsa-miR-218-5p
PKI55	E2F2	hsa-let-7a-5p, hsa-let-7b-5p, hsa-miR-125b-5p, hsa-miR-218-5p, hsa-miR-24-3p, hsa-miR-26a-5p
PKI55	BACE1	hsa-miR-124-3p, hsa-miR-15a-5p, hsa-miR-16-5p, hsa-miR-19b-3p
PKI55	VHL	hsa-miR-101-3p, hsa-miR-21-5p, hsa-miR-23b-3p
PKI55	TMED7	hsa-let-7a-5p, hsa-miR-181b-5p, hsa-miR-24-3p
PKI55	TET2	hsa-miR-101-3p, hsa-miR-125b-5p, hsa-miR-26a-5p
PKI55	STAT3	hsa-let-7a-5p, hsa-miR-124-3p, hsa-miR-125a-5p, hsa-miR-125b-5p, hsa-miR-21-5p, hsa-miR-23a-3p
PKI55	SOX6	hsa-miR-132-3p, hsa-miR-1-3p, hsa-miR-16-5p
PKI55	SOX5	hsa-miR-132-3p, hsa-miR-15a-5p, hsa-miR-16-5p, hsa-miR-21-5p
PKI55	SMAD2	hsa-let-7g-5p, hsa-miR-125a-5p, hsa-miR-132-3p, hsa-miR-15b-5p, hsa-miR-27a-3p, hsa-miR-27b-3p, hsa-miR-425-5p
PKI55	RPS6KB1	hsa-miR-16-5p, hsa-miR-195-5p, hsa-miR-218-5p
PKI55	RB1	hsa-let-7a-5p, hsa-miR-132-3p, hsa-miR-192-5p, hsa-miR-26a-5p, hsa-miR-590-5p
PKI55	RAF1	hsa-miR-125a-5p, hsa-miR-125b-5p, hsa-miR-132-3p, hsa-miR-16-5p, hsa-miR-195-5p
PKI55	PURA	hsa-miR-15a-5p, hsa-miR-15b-5p, hsa-miR-16-5p
PKI55	NOTCH1	hsa-miR-101-3p, hsa-miR-23b-3p, hsa-miR-24-3p, hsa-miR-27b-3p
PKI55	NCOA3	hsa-miR-137, hsa-miR-19b-3p, hsa-miR-21-5p
PKI55	MTDH	hsa-miR-124-3p, hsa-miR-137, hsa-miR-26a-5p, hsa-miR-320a
PKI55	MAPK1	hsa-let-7a-5p, hsa-let-7b-5p, hsa-miR-132-3p, hsa-miR-320a, hsa-miR-377-3p
PKI55	KAT2B	hsa-miR-181b-5p, hsa-miR-19a-3p, hsa-miR-19b-3p
PKI55	ETS1	hsa-miR-124-3p, hsa-miR-125b-5p, hsa-miR-1-3p, hsa-miR-23b-3p
PKI55	E2F3	hsa-miR-125a-5p, hsa-miR-125b-5p, hsa-miR-195-5p, hsa-miR-377-3p
PKI55	DNMT1	hsa-miR-185-5p, hsa-miR-19a-3p, hsa-miR-19b-3p, hsa-miR-377-3p
PKI55	CTNNB1	hsa-miR-101-3p, hsa-miR-124-3p, hsa-miR-21-5p, hsa-miR-23b-3p, hsa-miR-320a
PKI55	CDH2	hsa-miR-124-3p, hsa-miR-218-5p, hsa-miR-338-3p
PKI55	CCND2	hsa-let-7a-5p, hsa-let-7b-5p, hsa-miR-124-3p, hsa-miR-15a-5p, hsa-miR-16-5p, hsa-miR-26a-5p
PKI55	BMPR2	hsa-miR-19a-3p, hsa-miR-19b-3p, hsa-miR-21-5p
PKI55	ATXN1	hsa-miR-101-3p, hsa-miR-19a-3p, hsa-miR-19b-3p
PKI55	APP	hsa-let-7a-5p, hsa-miR-101-3p, hsa-miR-15a-5p, hsa-miR-16-5p
PKI55	ACTB	hsa-miR-15a-5p, hsa-miR-15b-5p, hsa-miR-16-5p
PITPNA-AS1	COPS6	hsa-let-7c-5p, hsa-let-7f-5p, hsa-let-7i-5p
PITPNA-AS1	NRAS	hsa-let-7a-5p, hsa-let-7b-5p, hsa-let-7c-5p, hsa-miR-145-5p, hsa-miR-98-5p
PITPNA-AS1	GPS1	hsa-let-7c-5p, hsa-let-7f-5p, hsa-let-7i-5p
PITPNA-AS1	CYP19A1	hsa-let-7f-5p, hsa-miR-19b-3p, hsa-miR-98-5p
PITPNA-AS1	COPS8	hsa-let-7c-5p, hsa-let-7f-5p, hsa-let-7i-5p
PINK1-AS	EGR2	hsa-miR-150-5p, hsa-miR-17-5p, hsa-miR-20a-5p
PINK1-AS	CLIC4	hsa-miR-106b-5p, hsa-miR-17-5p, hsa-miR-20a-5p, hsa-miR-93-5p
PINK1-AS	RUNX3	hsa-miR-106a-5p, hsa-miR-106b-5p, hsa-miR-148a-3p, hsa-miR-20a-5p
PINK1-AS	RUNX1	hsa-miR-106a-5p, hsa-miR-17-5p, hsa-miR-20a-5p
PINK1-AS	CDK2	hsa-miR-135a-5p, hsa-miR-17-5p, hsa-miR-20a-5p, hsa-miR-223-3p, hsa-miR-302d-3p
PINK1-AS	TIMP2	hsa-miR-106a-5p, hsa-miR-17-5p, hsa-miR-20a-5p, hsa-miR-519a-3p, hsa-miR-519c-3p
PDXDC2P	COL10A1	hsa-miR-29a-3p, hsa-miR-29b-3p, hsa-miR-29c-3p
PDXDC2P	TNFAIP3	hsa-miR-29a-3p, hsa-miR-29b-3p, hsa-miR-29c-3p
PDXDC2P	PER1	hsa-miR-29a-3p, hsa-miR-29b-3p, hsa-miR-29c-3p
PDXDC2P	TET2	hsa-miR-29a-3p, hsa-miR-29b-3p, hsa-miR-29c-3p
PDXDC2P	RBFOX2	hsa-miR-320a, hsa-miR-320b, hsa-miR-320d
PDXDC2P	PDGFRB	hsa-miR-29a-3p, hsa-miR-29b-3p, hsa-miR-29c-3p, hsa-miR-9-5p
PDXDC2P	NASP	hsa-miR-29a-3p, hsa-miR-29b-3p, hsa-miR-29c-3p
PDXDC2P	MECP2	hsa-miR-124-3p, hsa-miR-181c-5p, hsa-miR-340-5p
PDXDC2P	MCL1	hsa-miR-181a-5p, hsa-miR-181b-5p, hsa-miR-29a-3p, hsa-miR-29b-3p, hsa-miR-29c-3p, hsa-miR-320a, hsa-miR-582-5p
PDXDC2P	MAPK1	hsa-miR-129-5p, hsa-miR-181a-5p, hsa-miR-214-3p, hsa-miR-320a
PDXDC2P	ITGB1	hsa-miR-124-3p, hsa-miR-29a-3p, hsa-miR-29b-3p, hsa-miR-29c-3p
PDXDC2P	GSK3B	hsa-miR-182-5p, hsa-miR-29a-3p, hsa-miR-29b-3p, hsa-miR-9-5p, hsa-miR-96-5p
PDXDC2P	GATA6	hsa-miR-181a-5p, hsa-miR-181b-5p, hsa-miR-181c-5p
PDXDC2P	FBN1	hsa-miR-29a-3p, hsa-miR-29b-3p, hsa-miR-29c-3p
PDXDC2P	DNMT3A	hsa-miR-29a-3p, hsa-miR-29b-3p, hsa-miR-29c-3p
PDXDC2P	CREB1	hsa-miR-1224-5p, hsa-miR-181b-5p, hsa-miR-182-5p, hsa-miR-582-5p, hsa-miR-9-5p
PDXDC2P	ATM	hsa-miR-181a-5p, hsa-miR-181b-5p, hsa-miR-18a-3p, hsa-miR-421
PCBP1-AS1	CCNE2	hsa-miR-30a-5p, hsa-miR-30b-5p, hsa-miR-34c-5p, hsa-miR-449b-5p
PCBP1-AS1	TP53INP1	hsa-miR-125b-5p, hsa-miR-155-5p, hsa-miR-17-5p, hsa-miR-93-5p
PCBP1-AS1	SMAD5	hsa-miR-135a-5p, hsa-miR-135b-5p, hsa-miR-155-5p, hsa-miR-23a-3p
PCBP1-AS1	NASP	hsa-miR-29a-3p, hsa-miR-29b-3p, hsa-miR-29c-3p
PCBP1-AS1	DNMT3A	hsa-miR-143-3p, hsa-miR-29a-3p, hsa-miR-29b-3p, hsa-miR-29c-3p
PCBP1-AS1	CDC42	hsa-miR-185-5p, hsa-miR-224-5p, hsa-miR-29a-3p, hsa-miR-29b-3p, hsa-miR-29c-3p
PCBP1-AS1	BCL2L11	hsa-miR-17-5p, hsa-miR-181a-5p, hsa-miR-181b-5p, hsa-miR-24-3p, hsa-miR-494-3p
PAXBP1-AS1	MAPK9	hsa-miR-106a-5p, hsa-miR-106b-5p, hsa-miR-17-5p, hsa-miR-20a-5p, hsa-miR-20b-5p, hsa-miR-93-5p
PAXBP1-AS1	PELI1	hsa-miR-106b-5p, hsa-miR-17-5p, hsa-miR-20a-5p, hsa-miR-93-5p
PAXBP1-AS1	ZBTB4	hsa-miR-106b-5p, hsa-miR-17-5p, hsa-miR-93-5p
PAXBP1-AS1	TCEAL1	hsa-miR-106b-5p, hsa-miR-17-5p, hsa-miR-20a-5p
PAXBP1-AS1	SMAD7	hsa-miR-106b-5p, hsa-miR-20a-5p, hsa-miR-424-5p, hsa-miR-519d-3p, hsa-miR-93-5p
PAXBP1-AS1	RBL2	hsa-miR-106a-5p, hsa-miR-106b-5p, hsa-miR-17-5p, hsa-miR-20a-5p
PAXBP1-AS1	PURA	hsa-miR-106b-5p, hsa-miR-20a-5p, hsa-miR-93-5p
PART1	EGFR	hsa-miR-132-3p, hsa-miR-135a-5p, hsa-miR-27a-3p, hsa-miR-27b-3p, hsa-miR-7-5p
PART1	CDK8	hsa-miR-107, hsa-miR-195-5p, hsa-miR-26a-5p
PART1	BDNF	hsa-miR-132-3p, hsa-miR-1-3p, hsa-miR-15a-5p, hsa-miR-16-5p
PART1	PTK2	hsa-miR-135a-5p, hsa-miR-138-5p, hsa-miR-7-5p
PART1	KDR	hsa-miR-15b-5p, hsa-miR-16-5p, hsa-miR-195-5p, hsa-miR-24-3p
PART1	KAT2B	hsa-miR-17-5p, hsa-miR-19a-3p, hsa-miR-19b-3p, hsa-miR-93-5p
PART1	GJA1	hsa-miR-1-3p, hsa-miR-23a-3p, hsa-miR-23b-3p
PART1	FBXW7	hsa-miR-107, hsa-miR-24-3p, hsa-miR-27a-3p
PART1	CCNG1	hsa-miR-23b-3p, hsa-miR-27b-3p, hsa-miR-9-5p
OIP5-AS1	MAPK9	hsa-miR-106a-5p, hsa-miR-106b-5p, hsa-miR-141-3p, hsa-miR-17-5p, hsa-miR-199a-3p, hsa-miR-20a-5p, hsa-miR-20b-5p, hsa-miR-93-5p
OIP5-AS1	PTEN	hsa-miR-103a-3p, hsa-miR-106a-5p, hsa-miR-106b-5p, hsa-miR-107, hsa-miR-1273g-3p, hsa-miR-130a-3p, hsa-miR-130a-5p, hsa-miR-130b-3p, hsa-miR-141-3p, hsa-miR-142-5p, hsa-miR-152-3p, hsa-miR-153-3p, hsa-miR-155-5p, hsa-miR-17-3p, hsa-miR-17-5p, hsa-miR-181a-5p, hsa-miR-181b-5p, hsa-miR-181c-5p, hsa-miR-18a-5p, hsa-miR-193a-3p, hsa-miR-19a-3p, hsa-miR-19b-3p, hsa-miR-200a-3p, hsa-miR-200a-5p, hsa-mi…
OIP5-AS1	NLK	hsa-miR-181a-5p, hsa-miR-181b-5p, hsa-miR-181c-5p, hsa-miR-199b-5p, hsa-miR-409-3p, hsa-miR-92b-3p
OIP5-AS1	THRB	hsa-miR-155-5p, hsa-miR-200a-3p, hsa-miR-204-5p, hsa-miR-27a-3p, hsa-miR-425-5p, hsa-miR-452-5p
OIP5-AS1	PPARGC1A	hsa-miR-130a-3p, hsa-miR-130b-3p, hsa-miR-23a-3p, hsa-miR-485-3p, hsa-miR-485-5p
OIP5-AS1	SPRED1	hsa-miR-126-3p, hsa-miR-126-5p, hsa-miR-132-3p, hsa-miR-1-3p, hsa-miR-31-5p
OIP5-AS1	PHLPP1	hsa-miR-141-3p, hsa-miR-15a-5p, hsa-miR-17-5p, hsa-miR-18a-5p, hsa-miR-19a-3p, hsa-miR-200b-3p, hsa-miR-224-5p, hsa-miR-375, hsa-miR-92a-3p
OIP5-AS1	E2F6	hsa-let-7a-5p, hsa-miR-124-3p, hsa-miR-137, hsa-miR-193a-3p, hsa-miR-27a-3p, hsa-miR-28-5p
OIP5-AS1	AKT3	hsa-miR-15a-5p, hsa-miR-15b-5p, hsa-miR-16-5p, hsa-miR-20b-5p, hsa-miR-29a-3p, hsa-miR-29b-1-5p, hsa-miR-29b-3p, hsa-miR-29c-3p, hsa-miR-519d-3p
OGFR-AS1	JAG1	hsa-miR-199a-5p, hsa-miR-199b-5p, hsa-miR-21-5p, hsa-miR-410-3p
OGFR-AS1	CDH2	hsa-miR-194-5p, hsa-miR-199a-5p, hsa-miR-506-3p
NUTM2B-AS1	SMAD7	hsa-miR-185-5p, hsa-miR-25-3p, hsa-miR-33a-3p, hsa-miR-92b-3p
NUTM2B-AS1	IGF1R	hsa-let-7a-5p, hsa-let-7b-5p, hsa-let-7e-5p, hsa-miR-185-5p, hsa-miR-7-5p
NUTM2A-AS1	YY1	hsa-miR-31-5p, hsa-miR-34a-5p, hsa-miR-7-5p
NUTM2A-AS1	GATA4	hsa-miR-1-3p, hsa-miR-200b-3p, hsa-miR-200c-3p
NUTM2A-AS1	RUNX3	hsa-miR-106a-5p, hsa-miR-106b-5p, hsa-miR-130a-3p, hsa-miR-130b-3p, hsa-miR-148a-3p, hsa-miR-20a-5p, hsa-miR-301a-3p, hsa-miR-4295, hsa-miR-532-5p
NUTM2A-AS1	MPL	hsa-let-7a-5p, hsa-let-7c-5p, hsa-let-7d-5p, hsa-let-7e-5p, hsa-let-7f-5p, hsa-miR-1-3p, hsa-miR-98-5p
NUTM2A-AS1	WNT1	hsa-let-7a-5p, hsa-let-7e-5p, hsa-miR-122-5p, hsa-miR-148a-3p, hsa-miR-148b-3p, hsa-miR-152-3p, hsa-miR-200b-3p, hsa-miR-34a-5p
NUTM2A-AS1	IGF2BP1	hsa-let-7a-5p, hsa-let-7b-5p, hsa-let-7g-5p, hsa-miR-196b-5p, hsa-miR-9-5p
NUTM2A-AS1	HOXB5	hsa-miR-200b-3p, hsa-miR-200c-3p, hsa-miR-7-5p
NUTM2A-AS1	HNF4A	hsa-miR-143-3p, hsa-miR-216a-5p, hsa-miR-24-3p, hsa-miR-34a-5p
NUTM2A-AS1	FOXO3	hsa-miR-217, hsa-miR-222-3p, hsa-miR-31-5p, hsa-miR-93-5p, hsa-miR-9-5p
NR2F2-AS1	LATS2	hsa-miR-372-3p, hsa-miR-373-3p, hsa-miR-93-5p
NR2F2-AS1	KDR	hsa-miR-15b-5p, hsa-miR-16-5p, hsa-miR-195-5p, hsa-miR-326
NR2F2-AS1	FGFR1	hsa-miR-149-5p, hsa-miR-16-5p, hsa-miR-424-5p, hsa-miR-503-5p
NR2F2-AS1	CDK6	hsa-miR-16-5p, hsa-miR-195-5p, hsa-miR-200a-3p, hsa-miR-320a, hsa-miR-424-5p, hsa-miR-497-5p
NR2F2-AS1	CCND2	hsa-miR-154-5p, hsa-miR-15a-5p, hsa-miR-16-5p, hsa-miR-302d-3p
NR2F1-AS1	ABCG2	hsa-miR-181a-5p, hsa-miR-212-3p, hsa-miR-320a
NR2F1-AS1	BMI1	hsa-miR-139-5p, hsa-miR-15a-5p, hsa-miR-16-5p, hsa-miR-192-5p, hsa-miR-218-5p, hsa-miR-320a, hsa-miR-708-5p
NR2F1-AS1	HRAS	hsa-miR-139-5p, hsa-miR-143-3p, hsa-miR-181a-5p
NR2F1-AS1	GJA1	hsa-miR-218-5p, hsa-miR-23a-3p, hsa-miR-23b-3p
NR2F1-AS1	AKT3	hsa-miR-15a-5p, hsa-miR-15b-5p, hsa-miR-16-5p
NNT-AS1	HMGB1	hsa-miR-181b-5p, hsa-miR-21-5p, hsa-miR-22-3p, hsa-miR-320a
NNT-AS1	BMP7	hsa-miR-137, hsa-miR-22-3p, hsa-miR-342-3p, hsa-miR-542-3p
NNT-AS1	NLK	hsa-miR-101-3p, hsa-miR-181a-5p, hsa-miR-181b-5p, hsa-miR-181c-5p
NNT-AS1	NTRK3	hsa-miR-125a-5p, hsa-miR-125b-5p, hsa-miR-185-5p, hsa-miR-22-3p, hsa-miR-9-5p
NNT-AS1	NOTCH1	hsa-miR-101-3p, hsa-miR-144-3p, hsa-miR-181a-5p, hsa-miR-27b-3p, hsa-miR-30b-5p, hsa-miR-30c-5p, hsa-miR-326, hsa-miR-9-5p
NNT-AS1	E2F6	hsa-let-7a-5p, hsa-miR-137, hsa-miR-27a-3p
NNT-AS1	CREB1	hsa-miR-150-5p, hsa-miR-181b-5p, hsa-miR-27a-3p, hsa-miR-27b-3p, hsa-miR-582-5p, hsa-miR-9-5p
NKAPP1	PDCD4	hsa-miR-106a-5p, hsa-miR-181b-5p, hsa-miR-93-5p
NKAPP1	YOD1	hsa-miR-106b-5p, hsa-miR-17-5p, hsa-miR-20a-5p, hsa-miR-93-5p
NKAPP1	TP53INP1	hsa-miR-125b-5p, hsa-miR-17-5p, hsa-miR-20a-5p, hsa-miR-93-5p
NKAPP1	SMAD4	hsa-miR-125a-5p, hsa-miR-125b-5p, hsa-miR-17-5p, hsa-miR-20a-5p
NKAPP1	RBL2	hsa-miR-106a-5p, hsa-miR-106b-5p, hsa-miR-17-5p, hsa-miR-20a-5p
NKAPP1	RBL1	hsa-miR-106b-5p, hsa-miR-17-5p, hsa-miR-20a-5p
NKAPP1	PURA	hsa-miR-106b-5p, hsa-miR-20a-5p, hsa-miR-93-5p
NKAPP1	PHLPP2	hsa-miR-181a-5p, hsa-miR-20a-5p, hsa-miR-93-5p
NKAPP1	NOTCH2	hsa-miR-181c-5p, hsa-miR-326, hsa-miR-9-5p
NKAPP1	KRAS	hsa-miR-143-3p, hsa-miR-181a-5p, hsa-miR-181c-5p, hsa-miR-217
NKAPP1	KAT2B	hsa-miR-106b-5p, hsa-miR-17-5p, hsa-miR-181a-5p, hsa-miR-181b-5p, hsa-miR-93-5p
NKAPP1	BMPR2	hsa-miR-17-5p, hsa-miR-181c-5p, hsa-miR-20a-5p
NKAPP1	ATM	hsa-miR-106a-5p, hsa-miR-181a-5p, hsa-miR-181b-5p, hsa-miR-374a-5p
NKAPP1	APC	hsa-miR-106a-5p, hsa-miR-106b-5p, hsa-miR-125b-5p, hsa-miR-129-5p
NEAT1	EGFR	hsa-let-7a-5p, hsa-miR-122-5p, hsa-miR-125a-5p, hsa-miR-125b-5p, hsa-miR-128-3p, hsa-miR-132-3p, hsa-miR-133b, hsa-miR-135a-5p, hsa-miR-137, hsa-miR-145-5p, hsa-miR-146a-5p, hsa-miR-146b-5p, hsa-miR-200a-3p, hsa-miR-21-5p, hsa-miR-218-5p, hsa-miR-219a-5p, hsa-miR-27a-3p, hsa-miR-27a-5p, hsa-miR-27b-3p, hsa-miR-302b-3p, hsa-miR-491-5p, hsa-miR-520b, hsa-miR-520e, hsa-miR-542-5p, hsa-miR-574-3p, hs…
NEAT1	VIM	hsa-miR-124-3p, hsa-miR-129-5p, hsa-miR-132-3p, hsa-miR-134-5p, hsa-miR-138-5p, hsa-miR-17-3p, hsa-miR-196a-5p, hsa-miR-200c-3p, hsa-miR-204-5p, hsa-miR-217, hsa-miR-26a-5p, hsa-miR-29b-3p, hsa-miR-30a-5p, hsa-miR-30c-5p, hsa-miR-320a, hsa-miR-34a-5p, hsa-miR-378a-3p, hsa-miR-506-3p, hsa-miR-92a-3p, hsa-miR-9-5p
NEAT1	TIMP3	hsa-miR-103a-3p, hsa-miR-17-3p, hsa-miR-17-5p, hsa-miR-181b-5p, hsa-miR-20a-5p, hsa-miR-21-5p, hsa-miR-221-3p, hsa-miR-222-3p
NEAT1	TIAM1	hsa-miR-10b-5p, hsa-miR-141-3p, hsa-miR-182-5p, hsa-miR-21-5p, hsa-miR-22-3p, hsa-miR-29c-3p, hsa-miR-31-5p, hsa-miR-329-3p
NEAT1	TGFBR2	hsa-miR-106a-5p, hsa-miR-130a-3p, hsa-miR-142-5p, hsa-miR-145-5p, hsa-miR-17-5p, hsa-miR-181c-5p, hsa-miR-18a-5p, hsa-miR-196a-5p, hsa-miR-196b-5p, hsa-miR-19a-3p, hsa-miR-19b-3p, hsa-miR-202-5p, hsa-miR-204-5p, hsa-miR-20a-5p, hsa-miR-211-5p, hsa-miR-21-5p, hsa-miR-23b-5p, hsa-miR-27a-3p, hsa-miR-302b-3p, hsa-miR-302d-3p, hsa-miR-34b-5p, hsa-miR-370-3p, hsa-miR-372-3p, hsa-miR-373-3p, hsa-miR-52…
NEAT1	SERPINE1	hsa-miR-10a-5p, hsa-miR-143-3p, hsa-miR-145-5p, hsa-miR-148a-3p, hsa-miR-192-5p, hsa-miR-301a-3p, hsa-miR-30b-5p, hsa-miR-30c-5p, hsa-miR-99a-5p
NEAT1	RUNX2	hsa-miR-103a-3p, hsa-miR-135a-5p, hsa-miR-155-5p, hsa-miR-195-5p, hsa-miR-204-5p, hsa-miR-205-5p, hsa-miR-218-5p, hsa-miR-221-5p, hsa-miR-222-3p, hsa-miR-23b-3p, hsa-miR-29b-3p, hsa-miR-30a-3p, hsa-miR-30a-5p, hsa-miR-30b-5p, hsa-miR-30c-5p, hsa-miR-30d-5p, hsa-miR-320a, hsa-miR-335-5p, hsa-miR-34c-5p, hsa-miR-376c-3p, hsa-miR-433-3p, hsa-miR-497-5p, hsa-miR-628-3p
NEAT1	NRP1	hsa-miR-148a-3p, hsa-miR-152-3p, hsa-miR-206, hsa-miR-26a-5p, hsa-miR-320a, hsa-miR-338-3p, hsa-miR-338-5p, hsa-miR-9-5p
NEAT1	MITF	hsa-miR-101-3p, hsa-miR-137, hsa-miR-155-5p, hsa-miR-182-5p, hsa-miR-218-5p, hsa-miR-340-5p, hsa-miR-675-5p, hsa-miR-96-5p
NEAT1	MET	hsa-miR-101-3p, hsa-miR-124-3p, hsa-miR-133b, hsa-miR-137, hsa-miR-139-5p, hsa-miR-1-3p, hsa-miR-144-3p, hsa-miR-144-5p, hsa-miR-148a-3p, hsa-miR-181a-5p, hsa-miR-198, hsa-miR-199a-3p, hsa-miR-206, hsa-miR-23b-3p, hsa-miR-27a-3p, hsa-miR-27b-3p, hsa-miR-31-5p, hsa-miR-340-5p, hsa-miR-34a-3p, hsa-miR-34a-5p, hsa-miR-34b-3p, hsa-miR-34b-5p, hsa-miR-34c-5p, hsa-miR-409-3p, hsa-miR-410-3p, hsa-miR-43…
NEAT1	MAFB	hsa-miR-130a-3p, hsa-miR-135b-5p, hsa-miR-148a-3p, hsa-miR-152-3p, hsa-miR-155-5p, hsa-miR-199a-5p, hsa-miR-223-3p, hsa-miR-24-3p, hsa-miR-425-5p
NEAT1	KLF4	hsa-miR-103a-3p, hsa-miR-107, hsa-miR-10b-5p, hsa-miR-128-3p, hsa-miR-130a-3p, hsa-miR-135a-5p, hsa-miR-135b-5p, hsa-miR-137, hsa-miR-145-5p, hsa-miR-152-3p, hsa-miR-15a-5p, hsa-miR-25-3p, hsa-miR-29a-3p, hsa-miR-29c-3p, hsa-miR-32-5p, hsa-miR-34a-5p, hsa-miR-367-3p, hsa-miR-375, hsa-miR-7-5p, hsa-miR-92a-3p
NEAT1	ITGB3	hsa-let-7a-5p, hsa-let-7c-5p, hsa-miR-124-3p, hsa-miR-17-3p, hsa-miR-192-5p, hsa-miR-30a-5p, hsa-miR-320a, hsa-miR-338-3p, hsa-miR-98-5p
NEAT1	GRB2	hsa-miR-200a-3p, hsa-miR-27a-3p, hsa-miR-329-3p, hsa-miR-376c-3p, hsa-miR-378a-3p, hsa-miR-411-5p, hsa-miR-433-3p, hsa-miR-96-3p
NEAT1	FOXO1	hsa-miR-107, hsa-miR-132-3p, hsa-miR-132-5p, hsa-miR-135a-5p, hsa-miR-135b-5p, hsa-miR-153-3p, hsa-miR-15a-5p, hsa-miR-15b-5p, hsa-miR-182-5p, hsa-miR-183-5p, hsa-miR-186-5p, hsa-miR-196a-5p, hsa-miR-200c-3p, hsa-miR-21-5p, hsa-miR-222-3p, hsa-miR-223-3p, hsa-miR-27a-3p, hsa-miR-27b-3p, hsa-miR-339-3p, hsa-miR-370-3p, hsa-miR-486-5p, hsa-miR-9-3p, hsa-miR-9-5p, hsa-miR-96-5p
NEAT1	CYLD	hsa-miR-10b-5p, hsa-miR-126-5p, hsa-miR-130b-3p, hsa-miR-181b-5p, hsa-miR-182-5p, hsa-miR-362-5p, hsa-miR-500a-5p, hsa-miR-922
NEAT1	VEGFA	hsa-miR-101-3p, hsa-miR-101-5p, hsa-miR-106a-5p, hsa-miR-106b-5p, hsa-miR-107, hsa-miR-125a-3p, hsa-miR-125a-5p, hsa-miR-126-3p, hsa-miR-126-5p, hsa-miR-134-5p, hsa-miR-1-3p, hsa-miR-140-5p, hsa-miR-141-3p, hsa-miR-145-5p, hsa-miR-146a-5p, hsa-miR-147a, hsa-miR-150-5p, hsa-miR-15a-5p, hsa-miR-15b-5p, hsa-miR-16-1-3p, hsa-miR-16-5p, hsa-miR-17-5p, hsa-miR-181a-5p, hsa-miR-185-5p, hsa-miR-186-5p, h…
NEAT1	TLR2	hsa-miR-101-5p, hsa-miR-105-5p, hsa-miR-143-3p, hsa-miR-146a-5p, hsa-miR-154-5p, hsa-miR-19a-3p, hsa-miR-19b-3p, hsa-miR-23a-5p
NEAT1	TIMP2	hsa-miR-106a-5p, hsa-miR-17-5p, hsa-miR-200c-3p, hsa-miR-20a-5p, hsa-miR-301a-3p, hsa-miR-429, hsa-miR-519a-3p, hsa-miR-519c-3p, hsa-miR-519d-3p
NEAT1	TIMP1	hsa-miR-1293, hsa-miR-145-5p, hsa-miR-181a-5p, hsa-miR-19a-5p, hsa-miR-218-5p, hsa-miR-377-3p, hsa-miR-519a-3p, hsa-miR-96-5p
NEAT1	TET2	hsa-miR-101-3p, hsa-miR-125b-5p, hsa-miR-22-3p, hsa-miR-26a-5p, hsa-miR-29a-3p, hsa-miR-29b-3p, hsa-miR-29c-3p, hsa-miR-7-5p
NEAT1	STAT3	hsa-let-7a-5p, hsa-let-7c-5p, hsa-miR-106a-5p, hsa-miR-106b-5p, hsa-miR-124-3p, hsa-miR-124-5p, hsa-miR-125a-5p, hsa-miR-125b-5p, hsa-miR-130b-3p, hsa-miR-148a-3p, hsa-miR-17-5p, hsa-miR-181a-5p, hsa-miR-20a-5p, hsa-miR-20b-5p, hsa-miR-21-3p, hsa-miR-21-5p, hsa-miR-223-3p, hsa-miR-23a-3p, hsa-miR-29b-1-5p, hsa-miR-29b-3p, hsa-miR-340-5p, hsa-miR-375, hsa-miR-519a-3p, hsa-miR-519d-3p, hsa-miR-520c…
NEAT1	SP1	hsa-miR-129-5p, hsa-miR-133b, hsa-miR-137, hsa-miR-1-3p, hsa-miR-145-5p, hsa-miR-149-5p, hsa-miR-150-5p, hsa-miR-200b-3p, hsa-miR-200c-3p, hsa-miR-21-5p, hsa-miR-218-5p, hsa-miR-223-3p, hsa-miR-22-3p, hsa-miR-24-3p, hsa-miR-27a-3p, hsa-miR-29b-3p, hsa-miR-29c-3p, hsa-miR-324-5p, hsa-miR-326, hsa-miR-330-3p, hsa-miR-335-5p, hsa-miR-33a-5p, hsa-miR-375, hsa-miR-429, hsa-miR-612
NEAT1	SMAD2	hsa-let-7g-5p, hsa-miR-125a-5p, hsa-miR-128-3p, hsa-miR-132-3p, hsa-miR-145-5p, hsa-miR-146a-5p, hsa-miR-148a-3p, hsa-miR-155-5p, hsa-miR-15b-5p, hsa-miR-18a-5p, hsa-miR-18b-5p, hsa-miR-200a-3p, hsa-miR-200b-3p, hsa-miR-205-5p, hsa-miR-206, hsa-miR-212-3p, hsa-miR-27a-3p, hsa-miR-27b-3p, hsa-miR-323a-3p, hsa-miR-425-5p, hsa-miR-484, hsa-miR-486-5p
NEAT1	SMAD1	hsa-miR-155-5p, hsa-miR-205-5p, hsa-miR-26a-5p, hsa-miR-26b-5p, hsa-miR-30a-5p, hsa-miR-30b-5p, hsa-miR-30c-5p, hsa-miR-30d-5p, hsa-miR-675-3p
NEAT1	RPS6KB1	hsa-miR-122-5p, hsa-miR-145-5p, hsa-miR-16-5p, hsa-miR-195-5p, hsa-miR-200c-3p, hsa-miR-218-5p, hsa-miR-382-5p, hsa-miR-497-5p
NEAT1	ROCK2	hsa-miR-124-3p, hsa-miR-135a-5p, hsa-miR-138-5p, hsa-miR-139-5p, hsa-miR-142-3p, hsa-miR-144-5p, hsa-miR-200b-3p, hsa-miR-200c-3p
NEAT1	PLAG1	hsa-miR-107, hsa-miR-144-3p, hsa-miR-181a-5p, hsa-miR-181b-5p, hsa-miR-26a-5p, hsa-miR-27a-3p, hsa-miR-375, hsa-miR-424-5p
NEAT1	NOTCH2	hsa-miR-107, hsa-miR-146a-5p, hsa-miR-181c-5p, hsa-miR-191-5p, hsa-miR-23b-3p, hsa-miR-326, hsa-miR-34a-5p, hsa-miR-9-3p, hsa-miR-9-5p
NEAT1	NFIA	hsa-miR-107, hsa-miR-181b-5p, hsa-miR-21-5p, hsa-miR-223-3p, hsa-miR-29a-3p, hsa-miR-302b-3p, hsa-miR-382-5p, hsa-miR-424-5p
NEAT1	MCL1	hsa-miR-101-3p, hsa-miR-106a-5p, hsa-miR-125a-5p, hsa-miR-125b-5p, hsa-miR-133b, hsa-miR-139-5p, hsa-miR-148b-5p, hsa-miR-153-3p, hsa-miR-181a-5p, hsa-miR-181b-5p, hsa-miR-193a-3p, hsa-miR-193b-3p, hsa-miR-20a-5p, hsa-miR-26a-5p, hsa-miR-29a-3p, hsa-miR-29b-3p, hsa-miR-29c-3p, hsa-miR-302b-3p, hsa-miR-30c-5p, hsa-miR-320a, hsa-miR-339-3p, hsa-miR-512-5p, hsa-miR-518a-5p, hsa-miR-582-5p, hsa-miR-8…
NEAT1	MAPK1	hsa-let-7a-5p, hsa-let-7b-5p, hsa-miR-126-3p, hsa-miR-126-5p, hsa-miR-129-5p, hsa-miR-132-3p, hsa-miR-17-5p, hsa-miR-181a-5p, hsa-miR-197-3p, hsa-miR-199a-3p, hsa-miR-20a-5p, hsa-miR-214-3p, hsa-miR-28-5p, hsa-miR-320a, hsa-miR-329-3p, hsa-miR-335-5p, hsa-miR-377-3p, hsa-miR-378a-3p, hsa-miR-451a, hsa-miR-550a-3p, hsa-miR-9-3p
NEAT1	ITPR1	hsa-miR-204-5p, hsa-miR-211-5p, hsa-miR-34b-3p, hsa-miR-34c-5p, hsa-miR-424-5p, hsa-miR-448, hsa-miR-449a, hsa-miR-494-3p
NEAT1	HIF1A	hsa-miR-106a-5p, hsa-miR-106b-5p, hsa-miR-107, hsa-miR-138-1-3p, hsa-miR-138-5p, hsa-miR-142-5p, hsa-miR-155-5p, hsa-miR-17-5p, hsa-miR-186-5p, hsa-miR-18a-5p, hsa-miR-18b-5p, hsa-miR-199a-5p, hsa-miR-199b-5p, hsa-miR-20a-5p, hsa-miR-20b-5p, hsa-miR-22-3p, hsa-miR-23b-3p, hsa-miR-27a-3p, hsa-miR-338-3p, hsa-miR-33a-5p, hsa-miR-382-5p, hsa-miR-424-5p, hsa-miR-429, hsa-miR-433-3p, hsa-miR-497-3p, h…
NEAT1	GSK3B	hsa-miR-1246, hsa-miR-129-1-3p, hsa-miR-182-5p, hsa-miR-183-5p, hsa-miR-199a-5p, hsa-miR-224-5p, hsa-miR-26a-1-3p, hsa-miR-26a-5p, hsa-miR-27a-3p, hsa-miR-29a-3p, hsa-miR-29a-5p, hsa-miR-29b-3p, hsa-miR-346, hsa-miR-501-5p, hsa-miR-616-5p, hsa-miR-744-5p, hsa-miR-769-5p, hsa-miR-9-5p, hsa-miR-96-5p, hsa-miR-99b-3p
NEAT1	FLT1	hsa-miR-100-5p, hsa-miR-142-3p, hsa-miR-181a-5p, hsa-miR-199a-3p, hsa-miR-200b-3p, hsa-miR-200c-3p, hsa-miR-222-3p, hsa-miR-24-3p
NEAT1	COL4A1	hsa-miR-140-3p, hsa-miR-17-5p, hsa-miR-20a-5p, hsa-miR-21-5p, hsa-miR-29a-3p, hsa-miR-29b-3p, hsa-miR-29c-3p, hsa-miR-767-5p
NEAT1	COL3A1	hsa-let-7b-5p, hsa-let-7d-5p, hsa-miR-143-3p, hsa-miR-29a-3p, hsa-miR-29a-5p, hsa-miR-29b-1-5p, hsa-miR-29b-3p, hsa-miR-29c-3p, hsa-miR-767-5p
NEAT1	CDKN1A	hsa-let-7a-5p, hsa-miR-106a-5p, hsa-miR-106b-5p, hsa-miR-10b-5p, hsa-miR-125a-5p, hsa-miR-132-3p, hsa-miR-135a-5p, hsa-miR-145-5p, hsa-miR-146a-5p, hsa-miR-146b-5p, hsa-miR-155-5p, hsa-miR-15a-5p, hsa-miR-16-5p, hsa-miR-17-3p, hsa-miR-17-5p, hsa-miR-181a-5p, hsa-miR-182-5p, hsa-miR-18a-5p, hsa-miR-196a-5p, hsa-miR-19a-3p, hsa-miR-19b-3p, hsa-miR-208a-3p, hsa-miR-208b-3p, hsa-miR-20a-5p, hsa-miR-2…
NEAT1	CDK6	hsa-let-7a-5p, hsa-let-7b-5p, hsa-miR-103a-3p, hsa-miR-105-5p, hsa-miR-107, hsa-miR-124-3p, hsa-miR-129-2-3p, hsa-miR-129-5p, hsa-miR-137, hsa-miR-145-5p, hsa-miR-16-5p, hsa-miR-185-5p, hsa-miR-191-5p, hsa-miR-195-5p, hsa-miR-196a-5p, hsa-miR-200a-3p, hsa-miR-211-5p, hsa-miR-214-3p, hsa-miR-214-5p, hsa-miR-218-5p, hsa-miR-26a-5p, hsa-miR-26b-5p, hsa-miR-29a-3p, hsa-miR-29b-3p, hsa-miR-29c-3p, hsa…
NEAT1	BCL2	hsa-miR-100-5p, hsa-miR-125a-5p, hsa-miR-125b-5p, hsa-miR-126-3p, hsa-miR-135a-5p, hsa-miR-136-5p, hsa-miR-139-5p, hsa-miR-141-3p, hsa-miR-143-3p, hsa-miR-148a-3p, hsa-miR-153-3p, hsa-miR-15a-3p, hsa-miR-15a-5p, hsa-miR-15b-5p, hsa-miR-16-1-3p, hsa-miR-16-5p, hsa-miR-17-5p, hsa-miR-181a-5p, hsa-miR-181b-5p, hsa-miR-181c-5p, hsa-miR-181d-5p, hsa-miR-182-5p, hsa-miR-184, hsa-miR-18a-5p, hsa-miR-190…
NBPF1	E2F1	hsa-miR-135a-5p, hsa-miR-205-5p, hsa-miR-330-3p, hsa-miR-331-3p
NBPF1	CHEK1	hsa-miR-15a-5p, hsa-miR-15b-5p, hsa-miR-16-5p, hsa-miR-195-5p, hsa-miR-424-5p, hsa-miR-497-5p, hsa-miR-503-5p
NBPF1	TAB3	hsa-miR-15a-5p, hsa-miR-15b-5p, hsa-miR-16-5p, hsa-miR-195-5p, hsa-miR-497-5p
NBPF1	SP1	hsa-miR-149-5p, hsa-miR-22-3p, hsa-miR-27a-3p, hsa-miR-330-3p, hsa-miR-335-5p
NBPF1	SMAD5	hsa-miR-135a-5p, hsa-miR-135b-5p, hsa-miR-155-5p, hsa-miR-27a-3p
NBPF1	SMAD2	hsa-miR-128-3p, hsa-miR-148a-3p, hsa-miR-155-5p, hsa-miR-15b-5p, hsa-miR-205-5p, hsa-miR-27a-3p, hsa-miR-27b-3p
NBPF1	RPS6KB1	hsa-miR-16-5p, hsa-miR-195-5p, hsa-miR-497-5p
NBPF1	ROCK1	hsa-miR-135a-5p, hsa-miR-148a-3p, hsa-miR-148b-3p, hsa-miR-335-5p
NBPF1	RBFOX2	hsa-miR-22-3p, hsa-miR-320a, hsa-miR-320b, hsa-miR-320d
NBPF1	RAF1	hsa-miR-16-5p, hsa-miR-195-5p, hsa-miR-497-5p
NBPF1	PIK3R1	hsa-miR-128-3p, hsa-miR-155-5p, hsa-miR-503-5p
NBPF1	IKBKB	hsa-miR-148a-3p, hsa-miR-28-5p, hsa-miR-497-5p, hsa-miR-503-5p
NBPF1	HIF1A	hsa-miR-155-5p, hsa-miR-186-5p, hsa-miR-22-3p, hsa-miR-27a-3p, hsa-miR-424-5p
NBPF1	FBXW7	hsa-miR-128-3p, hsa-miR-155-5p, hsa-miR-27a-3p, hsa-miR-503-5p
NBPF1	E2F3	hsa-miR-128-3p, hsa-miR-195-5p, hsa-miR-377-3p, hsa-miR-497-5p, hsa-miR-503-5p
NBPF1	CDK6	hsa-miR-16-5p, hsa-miR-195-5p, hsa-miR-214-5p, hsa-miR-320a, hsa-miR-377-3p, hsa-miR-424-5p, hsa-miR-497-5p
NBPF1	BRCA1	hsa-miR-15a-5p, hsa-miR-16-5p, hsa-miR-335-5p
NBPF1	BCL6	hsa-miR-155-5p, hsa-miR-205-5p, hsa-miR-339-5p
NBPF1	APC	hsa-miR-135a-5p, hsa-miR-135b-5p, hsa-miR-155-5p, hsa-miR-27a-3p
NBPF1	ACTB	hsa-miR-15a-5p, hsa-miR-15b-5p, hsa-miR-16-5p, hsa-miR-28-5p, hsa-miR-497-5p
NALCN-AS1	LIMK1	hsa-miR-106a-5p, hsa-miR-17-5p, hsa-miR-20a-5p, hsa-miR-20b-5p
MORF4L2-AS1	SMAD4	hsa-miR-18a-5p, hsa-miR-19b-3p, hsa-miR-26a-5p, hsa-miR-26b-5p, hsa-miR-34a-3p
MORF4L2-AS1	EZH2	hsa-miR-101-5p, hsa-miR-26a-5p, hsa-miR-26b-5p
MMP24-AS1	IL6	hsa-miR-146a-5p, hsa-miR-146b-5p, hsa-miR-9-5p
MMP24-AS1	SNAI1	hsa-miR-22-3p, hsa-miR-30c-2-3p, hsa-miR-326, hsa-miR-34c-5p
MMP24-AS1	NFKB1	hsa-miR-124-3p, hsa-miR-146a-5p, hsa-miR-146b-5p, hsa-miR-9-5p
MMP24-AS1	MET	hsa-miR-124-3p, hsa-miR-34b-5p, hsa-miR-34c-5p, hsa-miR-449b-5p, hsa-miR-449c-5p
MMP24-AS1	CXCR4	hsa-miR-146a-3p, hsa-miR-146a-5p, hsa-miR-224-5p, hsa-miR-9-5p
MMP24-AS1	CD274	hsa-miR-124-3p, hsa-miR-326, hsa-miR-34b-5p, hsa-miR-665, hsa-miR-940
MMP24-AS1	RAC1	hsa-miR-124-3p, hsa-miR-146a-5p, hsa-miR-224-5p
MIR99AHG	EGFR	hsa-let-7a-5p, hsa-miR-137, hsa-miR-145-5p, hsa-miR-218-5p, hsa-miR-27a-3p, hsa-miR-27b-3p
MIR99AHG	KIT	hsa-miR-137, hsa-miR-20a-5p, hsa-miR-218-5p
MIR99AHG	TGFB2	hsa-miR-137, hsa-miR-142-5p, hsa-miR-145-5p
MIR99AHG	PHLPP2	hsa-miR-181a-5p, hsa-miR-20a-5p, hsa-miR-27a-3p
MIR99AHG	MAPK1	hsa-let-7a-5p, hsa-let-7b-5p, hsa-miR-181a-5p, hsa-miR-20a-5p
MIR7-3HG	ERBB3	hsa-miR-125a-5p, hsa-miR-125b-5p, hsa-miR-22-3p
MIR7-3HG	RBFOX2	hsa-miR-22-3p, hsa-miR-320a, hsa-miR-320b, hsa-miR-320d
MIR7-3HG	BCL2L2	hsa-miR-122-5p, hsa-miR-125b-5p, hsa-miR-129-2-3p, hsa-miR-204-5p, hsa-miR-214-3p
MIR663AHG	FGG	hsa-miR-29a-3p, hsa-miR-29b-3p, hsa-miR-29c-3p, hsa-miR-409-3p
MIR503HG	SNAI1	hsa-miR-204-5p, hsa-miR-211-5p, hsa-miR-22-3p
MIR503HG	SOX4	hsa-miR-204-5p, hsa-miR-211-5p, hsa-miR-31-5p
MIR503HG	SMAD4	hsa-miR-204-5p, hsa-miR-224-5p, hsa-miR-31-5p
MIR4500HG	CHUK	hsa-miR-15a-5p, hsa-miR-15b-5p, hsa-miR-16-5p, hsa-miR-195-5p
MIR4500HG	PTEN	hsa-miR-103a-3p, hsa-miR-106b-5p, hsa-miR-107, hsa-miR-142-5p, hsa-miR-205-5p, hsa-miR-20a-5p
MIR4500HG	PURA	hsa-miR-106b-5p, hsa-miR-15a-5p, hsa-miR-15b-5p, hsa-miR-16-5p, hsa-miR-20a-5p
MIR4458HG	TDG	hsa-miR-26a-5p, hsa-miR-29a-3p, hsa-miR-29b-3p, hsa-miR-29c-3p
MIR4458HG	HMGCR	hsa-miR-27a-3p, hsa-miR-29a-3p, hsa-miR-29b-3p, hsa-miR-29c-3p
MIR4458HG	MYCN	hsa-miR-29a-3p, hsa-miR-29b-3p, hsa-miR-29c-3p
MIR22HG	MMP2	hsa-miR-106b-5p, hsa-miR-143-3p, hsa-miR-17-5p, hsa-miR-218-5p, hsa-miR-377-3p, hsa-miR-519d-3p, hsa-miR-524-5p, hsa-miR-708-5p
MIR22HG	SDC1	hsa-miR-10b-5p, hsa-miR-143-3p, hsa-miR-302a-3p
MIR22HG	MMP9	hsa-let-7e-5p, hsa-miR-132-3p, hsa-miR-143-3p, hsa-miR-15b-5p, hsa-miR-218-5p, hsa-miR-377-3p, hsa-miR-497-5p, hsa-miR-524-5p
MIR22HG	BACH1	hsa-miR-106b-5p, hsa-miR-17-5p, hsa-miR-196a-5p, hsa-miR-20a-5p, hsa-miR-25-3p
MIR22HG	HMGA2	hsa-let-7e-5p, hsa-miR-106a-5p, hsa-miR-15a-5p, hsa-miR-16-5p, hsa-miR-196a-5p, hsa-miR-23b-3p, hsa-miR-370-3p, hsa-miR-495-3p
MIR22HG	RUNX2	hsa-miR-195-5p, hsa-miR-205-5p, hsa-miR-218-5p, hsa-miR-23b-3p, hsa-miR-30a-3p, hsa-miR-320a, hsa-miR-376c-3p, hsa-miR-497-5p
MIR22HG	NOD2	hsa-miR-10a-5p, hsa-miR-320a, hsa-miR-320b, hsa-miR-320c
MIR22HG	MMP14	hsa-miR-10a-5p, hsa-miR-143-3p, hsa-miR-193a-3p, hsa-miR-22-3p
MIR22HG	LIMK1	hsa-miR-106a-5p, hsa-miR-143-3p, hsa-miR-17-5p, hsa-miR-20a-5p
MIR22HG	LEFTY2	hsa-miR-302a-3p, hsa-miR-302d-3p, hsa-miR-373-3p
MIR22HG	BDNF	hsa-miR-10a-5p, hsa-miR-132-3p, hsa-miR-15a-5p, hsa-miR-16-5p, hsa-miR-22-3p, hsa-miR-339-5p
MIR22HG	XBP1	hsa-miR-125a-3p, hsa-miR-30a-3p, hsa-miR-320c
MIR22HG	STAT3	hsa-miR-106a-5p, hsa-miR-106b-5p, hsa-miR-17-5p, hsa-miR-20a-5p, hsa-miR-23a-3p, hsa-miR-340-5p, hsa-miR-519d-3p, hsa-miR-520c-3p
MIR22HG	PLAU	hsa-miR-143-3p, hsa-miR-193a-3p, hsa-miR-193b-3p, hsa-miR-23b-3p
MIR22HG	JAG1	hsa-miR-143-3p, hsa-miR-193a-3p, hsa-miR-199a-5p, hsa-miR-199b-5p, hsa-miR-524-5p
MIR22HG	IKBKB	hsa-miR-132-3p, hsa-miR-199a-5p, hsa-miR-218-5p, hsa-miR-28-5p, hsa-miR-497-5p, hsa-miR-503-5p
MIR22HG	FGFR1	hsa-miR-149-3p, hsa-miR-16-5p, hsa-miR-424-5p, hsa-miR-503-5p
MIR22HG	FAS	hsa-miR-106a-5p, hsa-miR-196b-5p, hsa-miR-23a-3p, hsa-miR-320a
MIR22HG	EPAS1	hsa-miR-17-5p, hsa-miR-185-5p, hsa-miR-20a-5p, hsa-miR-424-5p
MIR22HG	CD44	hsa-miR-143-3p, hsa-miR-199a-5p, hsa-miR-373-3p, hsa-miR-520a-3p, hsa-miR-520c-3p, hsa-miR-708-5p
MIR22HG	ACTB	hsa-miR-15a-5p, hsa-miR-15b-5p, hsa-miR-16-5p, hsa-miR-28-5p, hsa-miR-497-5p
MIR210HG	ITGA5	hsa-miR-31-5p, hsa-miR-326, hsa-miR-330-5p
MIR181A2HG	PELI1	hsa-miR-106b-5p, hsa-miR-17-5p, hsa-miR-18a-5p, hsa-miR-20a-5p, hsa-miR-93-5p
MIR181A2HG	E2F1	hsa-miR-106a-5p, hsa-miR-106b-5p, hsa-miR-17-5p, hsa-miR-20a-5p, hsa-miR-302b-3p, hsa-miR-519d-3p, hsa-miR-93-5p
MIR181A2HG	TP53INP1	hsa-miR-17-5p, hsa-miR-20a-5p, hsa-miR-93-5p
MIR181A2HG	SETD2	hsa-miR-106b-5p, hsa-miR-186-5p, hsa-miR-526b-3p
MIR181A2HG	RBL1	hsa-miR-106b-5p, hsa-miR-17-5p, hsa-miR-20a-5p
MIR181A2HG	MAP3K1	hsa-miR-302a-3p, hsa-miR-302b-3p, hsa-miR-302d-3p
MIR181A2HG	E2F3	hsa-miR-106b-5p, hsa-miR-17-5p, hsa-miR-20a-5p
MIR181A2HG	DNMT1	hsa-miR-17-5p, hsa-miR-18a-5p, hsa-miR-20a-5p
MIR181A2HG	BCL2L11	hsa-miR-106b-5p, hsa-miR-10b-5p, hsa-miR-17-5p, hsa-miR-20a-5p
MIR181A1HG	HMGB1	hsa-miR-129-5p, hsa-miR-21-5p, hsa-miR-320a
MIR181A1HG	GNAI1	hsa-miR-320a, hsa-miR-320c, hsa-miR-320d
MIR181A1HG	RBFOX2	hsa-miR-320a, hsa-miR-320b, hsa-miR-320d
MIR181A1HG	IGF1R	hsa-miR-100-5p, hsa-miR-21-5p, hsa-miR-320a, hsa-miR-99a-5p
MIR17HG	HMGB1	hsa-miR-153-3p, hsa-miR-181b-5p, hsa-miR-200a-3p, hsa-miR-205-5p, hsa-miR-22-3p, hsa-miR-320a, hsa-miR-34a-5p
MIR17HG	BACH1	hsa-miR-106b-5p, hsa-miR-155-5p, hsa-miR-17-5p, hsa-miR-18a-5p, hsa-miR-19a-3p, hsa-miR-19b-3p, hsa-miR-20a-5p, hsa-miR-25-3p, hsa-miR-93-5p
MIR17HG	CCND1	hsa-miR-106a-5p, hsa-miR-106b-5p, hsa-miR-141-3p, hsa-miR-155-5p, hsa-miR-16-5p, hsa-miR-17-5p, hsa-miR-19a-3p, hsa-miR-200a-3p, hsa-miR-20a-5p, hsa-miR-302a-3p, hsa-miR-302b-3p, hsa-miR-302d-3p, hsa-miR-34a-3p, hsa-miR-34a-5p, hsa-miR-34c-5p, hsa-miR-377-3p, hsa-miR-449a, hsa-miR-490-3p, hsa-miR-520a-3p, hsa-miR-520b, hsa-miR-708-5p
MIR17HG	TFAM	hsa-miR-155-5p, hsa-miR-199a-3p, hsa-miR-200a-3p, hsa-miR-494-3p
MIR17HG	RNF2	hsa-miR-181a-5p, hsa-miR-181b-5p, hsa-miR-200c-3p
MIR17HG	RAD51	hsa-miR-103a-3p, hsa-miR-107, hsa-miR-155-5p, hsa-miR-221-3p, hsa-miR-34a-5p, hsa-miR-96-5p
MIR17HG	PPP2R2A	hsa-miR-17-5p, hsa-miR-20a-5p, hsa-miR-222-3p
MIR17HG	PKNOX1	hsa-miR-17-5p, hsa-miR-19a-3p, hsa-miR-19b-3p, hsa-miR-20a-5p
MIR17HG	PELI1	hsa-miR-106b-5p, hsa-miR-155-5p, hsa-miR-17-5p, hsa-miR-18a-5p, hsa-miR-19a-3p, hsa-miR-19b-3p, hsa-miR-20a-5p, hsa-miR-25-3p, hsa-miR-93-5p
MIR17HG	MYB	hsa-miR-103a-3p, hsa-miR-106a-5p, hsa-miR-107, hsa-miR-150-5p, hsa-miR-155-5p, hsa-miR-16-5p, hsa-miR-200a-3p, hsa-miR-200c-3p, hsa-miR-34a-5p
MIR17HG	GNAI1	hsa-miR-320a, hsa-miR-320c, hsa-miR-320d
MIR17HG	CDK2	hsa-miR-103a-3p, hsa-miR-141-3p, hsa-miR-17-5p, hsa-miR-200c-3p, hsa-miR-20a-5p, hsa-miR-302a-3p, hsa-miR-302b-3p, hsa-miR-302d-3p, hsa-miR-372-3p
MIR17HG	CCNE2	hsa-miR-141-3p, hsa-miR-200a-3p, hsa-miR-200c-3p, hsa-miR-30b-5p, hsa-miR-34a-5p, hsa-miR-34c-5p, hsa-miR-449a, hsa-miR-449b-5p
MIR17HG	CCNA2	hsa-miR-130b-3p, hsa-miR-132-3p, hsa-miR-212-3p, hsa-miR-22-3p
MIR17HG	ZFPM2	hsa-miR-141-3p, hsa-miR-200a-3p, hsa-miR-200c-3p
MIR17HG	ZEB2	hsa-miR-132-3p, hsa-miR-141-3p, hsa-miR-153-3p, hsa-miR-200a-3p, hsa-miR-200c-3p, hsa-miR-205-5p, hsa-miR-221-3p, hsa-miR-708-5p
MIR17HG	ZEB1	hsa-miR-130b-3p, hsa-miR-141-3p, hsa-miR-150-5p, hsa-miR-200a-3p, hsa-miR-200c-3p, hsa-miR-205-5p, hsa-miR-494-3p, hsa-miR-96-5p
MIR17HG	YOD1	hsa-miR-106b-5p, hsa-miR-155-5p, hsa-miR-17-5p, hsa-miR-18a-5p, hsa-miR-19a-3p, hsa-miR-19b-3p, hsa-miR-20a-5p, hsa-miR-25-3p, hsa-miR-93-5p
MIR17HG	UVRAG	hsa-miR-130b-3p, hsa-miR-205-5p, hsa-miR-301a-3p
MIR17HG	TP53INP1	hsa-miR-130b-3p, hsa-miR-155-5p, hsa-miR-17-5p, hsa-miR-19a-3p, hsa-miR-20a-5p, hsa-miR-93-5p, hsa-miR-96-5p
MIR17HG	TGIF2	hsa-miR-148a-3p, hsa-miR-30c-5p, hsa-miR-34a-3p, hsa-miR-34a-5p, hsa-miR-34c-5p
MIR17HG	TCF7L1	hsa-miR-141-3p, hsa-miR-200a-3p, hsa-miR-200c-3p
MIR17HG	STAT5B	hsa-miR-150-5p, hsa-miR-28-3p, hsa-miR-28-5p
MIR17HG	SMAD2	hsa-miR-132-3p, hsa-miR-148a-3p, hsa-miR-155-5p, hsa-miR-18a-5p, hsa-miR-18b-5p, hsa-miR-200a-3p, hsa-miR-205-5p, hsa-miR-212-3p, hsa-miR-323a-3p
MIR17HG	RECK	hsa-miR-16-5p, hsa-miR-221-3p, hsa-miR-222-3p, hsa-miR-25-3p, hsa-miR-373-3p, hsa-miR-92b-3p, hsa-miR-96-5p
MIR17HG	RBL1	hsa-miR-106b-5p, hsa-miR-17-5p, hsa-miR-20a-5p
MIR17HG	RBFOX2	hsa-miR-22-3p, hsa-miR-320a, hsa-miR-320b, hsa-miR-320d
MIR17HG	PTPRD	hsa-miR-141-3p, hsa-miR-200a-3p, hsa-miR-200c-3p
MIR17HG	PDGFRA	hsa-miR-130a-3p, hsa-miR-130b-3p, hsa-miR-34a-5p, hsa-miR-34c-5p, hsa-miR-449a, hsa-miR-449b-5p
MIR17HG	NCOA3	hsa-miR-17-5p, hsa-miR-18a-5p, hsa-miR-19b-3p, hsa-miR-33a-5p
MIR17HG	MYCN	hsa-miR-103a-3p, hsa-miR-19a-3p, hsa-miR-19b-3p, hsa-miR-34a-5p, hsa-miR-34c-5p, hsa-miR-375, hsa-miR-449a, hsa-miR-449b-5p
MIR17HG	MECP2	hsa-miR-130a-3p, hsa-miR-155-5p, hsa-miR-181c-5p, hsa-miR-19a-3p, hsa-miR-212-3p
MIR17HG	MAP3K1	hsa-miR-302a-3p, hsa-miR-302b-3p, hsa-miR-302d-3p
MIR17HG	KRAS	hsa-miR-155-5p, hsa-miR-16-5p, hsa-miR-181a-5p, hsa-miR-181c-5p, hsa-miR-18a-3p, hsa-miR-200c-3p, hsa-miR-217, hsa-miR-96-5p
MIR17HG	KLHL20	hsa-miR-141-3p, hsa-miR-200a-3p, hsa-miR-200c-3p
MIR17HG	DICER1	hsa-miR-103a-3p, hsa-miR-107, hsa-miR-130a-3p, hsa-miR-130b-3p, hsa-miR-18a-5p, hsa-miR-200c-3p, hsa-miR-221-3p, hsa-miR-222-3p
MIR17HG	CCND2	hsa-miR-106b-5p, hsa-miR-155-5p, hsa-miR-16-5p, hsa-miR-17-5p, hsa-miR-20a-5p, hsa-miR-302b-3p, hsa-miR-302d-3p, hsa-miR-30c-5p
MIR17HG	BTG1	hsa-miR-22-3p, hsa-miR-372-3p, hsa-miR-373-3p
MIR17HG	BMF	hsa-miR-221-3p, hsa-miR-222-3p, hsa-miR-34c-5p
MIR17HG	ARID4B	hsa-miR-106a-5p, hsa-miR-19b-3p, hsa-miR-20b-5p, hsa-miR-92a-3p
MIAT	MAPK9	hsa-miR-17-5p, hsa-miR-20b-5p, hsa-miR-93-5p
MIAT	ZBTB4	hsa-miR-17-5p, hsa-miR-19a-3p, hsa-miR-93-5p
MIAT	YOD1	hsa-miR-17-5p, hsa-miR-19a-3p, hsa-miR-19b-3p, hsa-miR-93-5p
MIAT	TET2	hsa-miR-22-3p, hsa-miR-29a-3p, hsa-miR-29b-3p, hsa-miR-29c-3p, hsa-miR-7-5p
MIAT	SIRT1	hsa-miR-181a-5p, hsa-miR-221-3p, hsa-miR-22-3p, hsa-miR-23b-3p, hsa-miR-29c-3p
MIAT	PIK3R1	hsa-miR-221-3p, hsa-miR-29a-3p, hsa-miR-29b-3p
MIAT	PHLPP2	hsa-miR-181a-5p, hsa-miR-27a-3p, hsa-miR-93-5p
MIAT	NOTCH1	hsa-miR-139-5p, hsa-miR-181a-5p, hsa-miR-23b-3p, hsa-miR-27b-3p
MIAT	NCOA3	hsa-miR-17-5p, hsa-miR-19b-3p, hsa-miR-29b-3p
MIAT	NASP	hsa-miR-29a-3p, hsa-miR-29b-3p, hsa-miR-29c-3p
MIAT	MTDH	hsa-miR-22-3p, hsa-miR-320a, hsa-miR-342-3p
MIAT	MAPK1	hsa-miR-17-5p, hsa-miR-181a-5p, hsa-miR-320a, hsa-miR-9-3p
MIAT	GSK3B	hsa-miR-129-1-3p, hsa-miR-27a-3p, hsa-miR-29a-3p, hsa-miR-29b-3p
MIAT	DNMT3B	hsa-miR-29a-3p, hsa-miR-29b-3p, hsa-miR-29c-3p
MIAT	DNMT3A	hsa-miR-29a-3p, hsa-miR-29b-3p, hsa-miR-29c-3p
MIAT	DNMT1	hsa-miR-17-5p, hsa-miR-185-5p, hsa-miR-19a-3p, hsa-miR-19b-3p, hsa-miR-29a-3p, hsa-miR-29b-3p, hsa-miR-342-3p
MIAT	CUL5	hsa-miR-19a-3p, hsa-miR-19b-3p, hsa-miR-7-5p
MIAT	CLIP1	hsa-miR-17-5p, hsa-miR-19a-3p, hsa-miR-19b-3p, hsa-miR-93-5p
MIAT	CCND2	hsa-miR-17-5p, hsa-miR-29a-3p, hsa-miR-29b-3p, hsa-miR-29c-3p
MIAT	BMPR2	hsa-miR-17-5p, hsa-miR-19a-3p, hsa-miR-19b-3p
MIAT	BCL2	hsa-miR-139-5p, hsa-miR-17-5p, hsa-miR-181a-5p, hsa-miR-29a-3p, hsa-miR-29b-3p, hsa-miR-29c-3p, hsa-miR-7-5p
MEG8	MYC	hsa-let-7a-5p, hsa-let-7g-5p, hsa-miR-126-5p, hsa-miR-24-3p, hsa-miR-375
MEG8	MAPK1	hsa-let-7a-5p, hsa-let-7b-5p, hsa-miR-126-5p, hsa-miR-132-3p
MEG8	ETS1	hsa-miR-126-5p, hsa-miR-23b-3p, hsa-miR-9-5p
MEG8	DICER1	hsa-let-7a-5p, hsa-let-7d-5p, hsa-miR-9-5p
MEG3	PTEN	hsa-miR-103a-3p, hsa-miR-106a-5p, hsa-miR-106b-5p, hsa-miR-107, hsa-miR-141-3p, hsa-miR-17-3p, hsa-miR-17-5p, hsa-miR-181a-5p, hsa-miR-181b-5p, hsa-miR-181c-5p, hsa-miR-18a-5p, hsa-miR-19b-3p, hsa-miR-200a-3p, hsa-miR-20a-5p, hsa-miR-20b-5p, hsa-miR-214-3p, hsa-miR-217, hsa-miR-22-3p, hsa-miR-23a-3p, hsa-miR-23b-3p, hsa-miR-26a-5p, hsa-miR-26b-5p, hsa-miR-29a-3p, hsa-miR-29a-5p, hsa-miR-29b-3p, h…
MEG3	CPEB3	hsa-let-7b-5p, hsa-miR-26a-5p, hsa-miR-29a-3p
MEG3	TIMP3	hsa-miR-103a-3p, hsa-miR-17-3p, hsa-miR-17-5p, hsa-miR-181b-5p, hsa-miR-20a-5p
MEG3	ERBB3	hsa-miR-125a-5p, hsa-miR-125b-5p, hsa-miR-143-5p, hsa-miR-199a-5p, hsa-miR-22-3p
MEG3	VEGFA	hsa-miR-106a-5p, hsa-miR-106b-5p, hsa-miR-107, hsa-miR-125a-3p, hsa-miR-125a-5p, hsa-miR-126-5p, hsa-miR-1-3p, hsa-miR-140-5p, hsa-miR-141-3p, hsa-miR-145-5p, hsa-miR-150-5p, hsa-miR-15a-5p, hsa-miR-15b-5p, hsa-miR-16-5p, hsa-miR-17-5p, hsa-miR-181a-5p, hsa-miR-185-5p, hsa-miR-186-5p, hsa-miR-195-5p, hsa-miR-199a-3p, hsa-miR-199a-5p, hsa-miR-20a-5p, hsa-miR-20b-5p, hsa-miR-23b-3p, hsa-miR-27b-3p,…
MEG3	TET2	hsa-miR-125b-5p, hsa-miR-22-3p, hsa-miR-26a-5p, hsa-miR-29a-3p, hsa-miR-29b-3p, hsa-miR-29c-3p, hsa-miR-7-5p
MEG3	TET1	hsa-miR-29a-3p, hsa-miR-29b-3p, hsa-miR-30a-5p
MEG3	SRF	hsa-miR-122-5p, hsa-miR-1-3p, hsa-miR-200a-3p, hsa-miR-483-3p, hsa-miR-9-5p
MEG3	SMURF1	hsa-miR-140-5p, hsa-miR-15b-5p, hsa-miR-17-5p, hsa-miR-497-5p
MEG3	RPS6KB1	hsa-miR-122-5p, hsa-miR-145-5p, hsa-miR-16-5p, hsa-miR-195-5p, hsa-miR-218-5p, hsa-miR-497-5p
MEG3	RCOR1	hsa-miR-22-3p, hsa-miR-432-5p, hsa-miR-9-3p
MEG3	RAF1	hsa-miR-125a-5p, hsa-miR-125b-5p, hsa-miR-132-3p, hsa-miR-16-5p, hsa-miR-195-5p, hsa-miR-497-5p, hsa-miR-7-5p
MEG3	PPP1R13B	hsa-miR-29a-3p, hsa-miR-29b-3p, hsa-miR-29c-3p
MEG3	PLAG1	hsa-miR-107, hsa-miR-181a-5p, hsa-miR-181b-5p, hsa-miR-26a-5p, hsa-miR-27a-3p, hsa-miR-424-5p
MEG3	PHLPP2	hsa-miR-135a-5p, hsa-miR-141-3p, hsa-miR-181a-5p, hsa-miR-20a-5p, hsa-miR-224-5p, hsa-miR-27a-3p, hsa-miR-93-5p
MEG3	NCOR2	hsa-miR-100-5p, hsa-miR-125b-5p, hsa-miR-16-5p, hsa-miR-30c-5p, hsa-miR-34a-3p
MEG3	NCOA3	hsa-miR-137, hsa-miR-17-3p, hsa-miR-17-5p, hsa-miR-18a-5p, hsa-miR-19b-3p, hsa-miR-29b-3p, hsa-miR-33a-5p
MEG3	NASP	hsa-miR-29a-3p, hsa-miR-29b-3p, hsa-miR-29c-3p
MEG3	MEF2D	hsa-miR-103a-3p, hsa-miR-122-5p, hsa-miR-17-5p, hsa-miR-18a-5p, hsa-miR-20a-5p
MEG3	IGF1R	hsa-let-7a-5p, hsa-let-7b-5p, hsa-let-7e-5p, hsa-miR-100-5p, hsa-miR-122-5p, hsa-miR-125b-5p, hsa-miR-140-5p, hsa-miR-141-3p, hsa-miR-143-3p, hsa-miR-145-5p, hsa-miR-148a-3p, hsa-miR-16-5p, hsa-miR-181b-5p, hsa-miR-185-5p, hsa-miR-214-5p, hsa-miR-217, hsa-miR-223-5p, hsa-miR-26b-5p, hsa-miR-320a, hsa-miR-376a-3p, hsa-miR-486-5p, hsa-miR-497-5p, hsa-miR-7-5p, hsa-miR-99a-5p
MEG3	HIPK2	hsa-miR-141-3p, hsa-miR-181a-5p, hsa-miR-27a-3p
MEG3	HDAC4	hsa-miR-125a-5p, hsa-miR-1-3p, hsa-miR-140-5p, hsa-miR-22-3p, hsa-miR-29b-3p, hsa-miR-30c-5p, hsa-miR-9-5p
MEG3	GPR78	hsa-miR-181a-5p, hsa-miR-199a-5p, hsa-miR-30d-5p
MEG3	ELAVL1	hsa-miR-125a-5p, hsa-miR-296-5p, hsa-miR-29b-3p, hsa-miR-519a-3p, hsa-miR-519b-3p, hsa-miR-519c-3p, hsa-miR-9-5p
MEG3	CLIP1	hsa-miR-106b-5p, hsa-miR-17-3p, hsa-miR-17-5p, hsa-miR-18a-5p, hsa-miR-19b-3p, hsa-miR-20a-5p, hsa-miR-93-5p
MEG3	CCKBR	hsa-miR-148a-3p, hsa-miR-148b-3p, hsa-miR-22-3p, hsa-miR-339-5p, hsa-miR-488-3p
MEG3	BMPR2	hsa-miR-100-5p, hsa-miR-135a-5p, hsa-miR-17-5p, hsa-miR-181c-5p, hsa-miR-19b-3p, hsa-miR-20a-5p, hsa-miR-92a-3p
MEG3	BCL9	hsa-miR-218-5p, hsa-miR-30a-5p, hsa-miR-30b-5p, hsa-miR-30c-2-3p, hsa-miR-30c-5p, hsa-miR-30d-5p
MEG3	BCL2L2	hsa-miR-122-5p, hsa-miR-125b-5p, hsa-miR-129-2-3p, hsa-miR-195-5p, hsa-miR-204-5p, hsa-miR-214-3p
MEG3	ARID4B	hsa-miR-106a-5p, hsa-miR-19b-3p, hsa-miR-20b-5p, hsa-miR-92a-3p
MEG3	APP	hsa-let-7a-5p, hsa-let-7d-5p, hsa-miR-106a-5p, hsa-miR-106b-5p, hsa-miR-15a-5p, hsa-miR-16-5p, hsa-miR-17-5p, hsa-miR-20a-5p, hsa-miR-520c-3p
MCM3AP-AS1	CHEK1	hsa-miR-15a-5p, hsa-miR-15b-5p, hsa-miR-16-5p, hsa-miR-195-5p, hsa-miR-24-3p, hsa-miR-26a-5p, hsa-miR-424-5p, hsa-miR-497-5p, hsa-miR-503-5p
MCM3AP-AS1	CCNA2	hsa-let-7b-5p, hsa-miR-132-3p, hsa-miR-212-3p, hsa-miR-24-3p
MCM3AP-AS1	BMI1	hsa-let-7g-5p, hsa-miR-15a-5p, hsa-miR-16-5p, hsa-miR-194-5p, hsa-miR-21-5p, hsa-miR-320a, hsa-miR-376c-3p
MCM3AP-AS1	AURKB	hsa-let-7a-5p, hsa-let-7e-5p, hsa-let-7i-5p, hsa-miR-24-3p
MCM3AP-AS1	SMAD4	hsa-miR-144-3p, hsa-miR-18a-5p, hsa-miR-19a-3p, hsa-miR-19b-3p, hsa-miR-204-5p, hsa-miR-224-5p, hsa-miR-26a-5p, hsa-miR-26b-5p
MCM3AP-AS1	RBFOX2	hsa-miR-320a, hsa-miR-320b, hsa-miR-320d
MCM3AP-AS1	RAF1	hsa-miR-132-3p, hsa-miR-16-5p, hsa-miR-195-5p, hsa-miR-497-5p
MCM3AP-AS1	EZH2	hsa-let-7a-5p, hsa-let-7b-5p, hsa-let-7e-5p, hsa-miR-144-3p, hsa-miR-26a-5p, hsa-miR-26b-5p, hsa-miR-320c
MCM3AP-AS1	CREB5	hsa-miR-204-5p, hsa-miR-211-5p, hsa-miR-590-5p
MAPKAPK5-AS1	TDG	hsa-miR-29a-3p, hsa-miR-29b-3p, hsa-miR-29c-3p
MAPKAPK5-AS1	RAD51	hsa-miR-103a-3p, hsa-miR-107, hsa-miR-96-5p
MAPKAPK5-AS1	HMGCR	hsa-miR-29a-3p, hsa-miR-29b-3p, hsa-miR-29c-3p
MAPKAPK5-AS1	CDKN1B	hsa-miR-182-5p, hsa-miR-194-5p, hsa-miR-200b-3p, hsa-miR-452-5p
MAPKAPK5-AS1	CDK4	hsa-miR-124-3p, hsa-miR-1-3p, hsa-miR-145-5p, hsa-miR-182-5p, hsa-miR-29a-3p, hsa-miR-486-5p
MAPKAPK5-AS1	CCNE2	hsa-miR-200b-3p, hsa-miR-200c-3p, hsa-miR-30a-5p, hsa-miR-30b-5p, hsa-miR-503-5p
MAPKAPK5-AS1	BMI1	hsa-miR-194-5p, hsa-miR-200b-3p, hsa-miR-200c-3p, hsa-miR-300, hsa-miR-30e-5p, hsa-miR-338-5p, hsa-miR-452-5p
MAPKAPK5-AS1	UBE2I	hsa-miR-200c-3p, hsa-miR-30c-5p, hsa-miR-30e-5p
MAPKAPK5-AS1	RAC1	hsa-miR-101-3p, hsa-miR-124-3p, hsa-miR-194-5p
MAPKAPK5-AS1	PRMT5	hsa-miR-19a-3p, hsa-miR-25-3p, hsa-miR-96-5p
MAPKAPK5-AS1	HOXB5	hsa-miR-200b-3p, hsa-miR-200c-3p, hsa-miR-429
MAPKAPK5-AS1	FOXO3	hsa-miR-182-5p, hsa-miR-217, hsa-miR-23a-3p, hsa-miR-29a-3p, hsa-miR-30c-5p, hsa-miR-96-5p
MAPKAPK5-AS1	FGG	hsa-miR-29a-3p, hsa-miR-29b-3p, hsa-miR-29c-3p
MAPKAPK5-AS1	ATG12	hsa-miR-200b-3p, hsa-miR-23b-3p, hsa-miR-30b-5p, hsa-miR-30d-5p
MALAT1	NLK	hsa-miR-101-3p, hsa-miR-181a-5p, hsa-miR-181b-5p, hsa-miR-181c-5p, hsa-miR-199b-5p, hsa-miR-409-3p, hsa-miR-92b-3p
MALAT1	TIMP3	hsa-miR-103a-3p, hsa-miR-17-3p, hsa-miR-17-5p, hsa-miR-181b-5p, hsa-miR-20a-5p, hsa-miR-21-5p, hsa-miR-221-3p, hsa-miR-222-3p
MALAT1	TIAM1	hsa-miR-10b-5p, hsa-miR-141-3p, hsa-miR-182-5p, hsa-miR-21-5p, hsa-miR-22-3p, hsa-miR-29c-3p, hsa-miR-31-5p, hsa-miR-329-3p
MALAT1	JAK2	hsa-miR-101-3p, hsa-miR-125a-5p, hsa-miR-125b-5p, hsa-miR-135a-5p, hsa-miR-204-5p, hsa-miR-216a-5p, hsa-miR-375
MALAT1	WNK1	hsa-miR-141-5p, hsa-miR-192-5p, hsa-miR-199a-5p, hsa-miR-215-5p, hsa-miR-24-1-5p, hsa-miR-27a-3p, hsa-miR-506-3p
MALAT1	VEGFA	hsa-miR-101-3p, hsa-miR-101-5p, hsa-miR-106a-5p, hsa-miR-106b-5p, hsa-miR-107, hsa-miR-125a-3p, hsa-miR-125a-5p, hsa-miR-126-5p, hsa-miR-134-5p, hsa-miR-1-3p, hsa-miR-140-5p, hsa-miR-141-3p, hsa-miR-145-5p, hsa-miR-146a-5p, hsa-miR-147a, hsa-miR-150-5p, hsa-miR-15a-5p, hsa-miR-15b-5p, hsa-miR-16-1-3p, hsa-miR-16-5p, hsa-miR-17-5p, hsa-miR-181a-5p, hsa-miR-185-5p, hsa-miR-186-5p, hsa-miR-195-5p, h…
MALAT1	STAT3	hsa-let-7a-5p, hsa-let-7c-5p, hsa-miR-106a-5p, hsa-miR-106b-5p, hsa-miR-124-3p, hsa-miR-124-5p, hsa-miR-125a-5p, hsa-miR-125b-5p, hsa-miR-130b-3p, hsa-miR-148a-3p, hsa-miR-17-5p, hsa-miR-181a-5p, hsa-miR-20a-5p, hsa-miR-20b-5p, hsa-miR-21-3p, hsa-miR-21-5p, hsa-miR-223-3p, hsa-miR-23a-3p, hsa-miR-29b-1-5p, hsa-miR-29b-3p, hsa-miR-340-5p, hsa-miR-375, hsa-miR-519d-3p, hsa-miR-520c-3p, hsa-miR-544a…
MALAT1	SMAD2	hsa-let-7g-5p, hsa-miR-125a-5p, hsa-miR-128-3p, hsa-miR-132-3p, hsa-miR-145-5p, hsa-miR-146a-5p, hsa-miR-148a-3p, hsa-miR-155-5p, hsa-miR-15b-5p, hsa-miR-18a-5p, hsa-miR-18b-5p, hsa-miR-200a-3p, hsa-miR-200b-3p, hsa-miR-205-5p, hsa-miR-206, hsa-miR-212-3p, hsa-miR-27a-3p, hsa-miR-27b-3p, hsa-miR-323a-3p, hsa-miR-425-5p, hsa-miR-484, hsa-miR-486-5p
MALAT1	SIRT1	hsa-miR-124-3p, hsa-miR-128-3p, hsa-miR-132-3p, hsa-miR-133b, hsa-miR-138-5p, hsa-miR-142-5p, hsa-miR-181a-5p, hsa-miR-181b-5p, hsa-miR-181c-5p, hsa-miR-199a-5p, hsa-miR-199b-5p, hsa-miR-200c-3p, hsa-miR-204-5p, hsa-miR-216a-5p, hsa-miR-217, hsa-miR-221-3p, hsa-miR-22-3p, hsa-miR-23b-3p, hsa-miR-29c-3p, hsa-miR-34a-3p, hsa-miR-34a-5p, hsa-miR-373-3p, hsa-miR-449a, hsa-miR-449b-5p, hsa-miR-520c-3p…
MALAT1	RAF1	hsa-miR-125a-5p, hsa-miR-125b-5p, hsa-miR-132-3p, hsa-miR-139-5p, hsa-miR-16-5p, hsa-miR-195-5p, hsa-miR-497-5p, hsa-miR-7-1-3p, hsa-miR-7-5p
MALAT1	PLAG1	hsa-miR-107, hsa-miR-144-3p, hsa-miR-181a-5p, hsa-miR-181b-5p, hsa-miR-26a-5p, hsa-miR-27a-3p, hsa-miR-375, hsa-miR-424-5p
MALAT1	NR4A2	hsa-miR-129-5p, hsa-miR-19a-3p, hsa-miR-206, hsa-miR-217, hsa-miR-302d-3p, hsa-miR-34a-5p, hsa-miR-372-3p
MALAT1	NOTCH1	hsa-miR-101-3p, hsa-miR-10b-5p, hsa-miR-129-5p, hsa-miR-139-5p, hsa-miR-144-3p, hsa-miR-146a-5p, hsa-miR-181a-5p, hsa-miR-200b-3p, hsa-miR-200c-3p, hsa-miR-23b-3p, hsa-miR-24-3p, hsa-miR-27b-3p, hsa-miR-296-5p, hsa-miR-30a-3p, hsa-miR-30a-5p, hsa-miR-30b-5p, hsa-miR-30c-5p, hsa-miR-30d-5p, hsa-miR-30e-5p, hsa-miR-326, hsa-miR-34a-5p, hsa-miR-34b-3p, hsa-miR-34c-5p, hsa-miR-363-3p, hsa-miR-410-3p,…
MALAT1	NFIA	hsa-miR-107, hsa-miR-181b-5p, hsa-miR-21-5p, hsa-miR-223-3p, hsa-miR-29a-3p, hsa-miR-302b-3p, hsa-miR-382-5p, hsa-miR-424-5p
MALAT1	NANOG	hsa-miR-128-3p, hsa-miR-134-5p, hsa-miR-145-5p, hsa-miR-150-5p, hsa-miR-181a-3p, hsa-miR-302a-3p, hsa-miR-34a-5p, hsa-miR-34b-3p, hsa-miR-34c-5p
MALAT1	MCL1	hsa-miR-101-3p, hsa-miR-106a-5p, hsa-miR-125a-5p, hsa-miR-125b-5p, hsa-miR-133b, hsa-miR-139-5p, hsa-miR-148b-5p, hsa-miR-181a-5p, hsa-miR-181b-5p, hsa-miR-193a-3p, hsa-miR-193b-3p, hsa-miR-20a-5p, hsa-miR-26a-5p, hsa-miR-29a-3p, hsa-miR-29b-3p, hsa-miR-29c-3p, hsa-miR-302b-3p, hsa-miR-30c-5p, hsa-miR-320a, hsa-miR-512-5p, hsa-miR-518a-5p, hsa-miR-582-5p, hsa-miR-876-3p
MALAT1	MBNL2	hsa-miR-10b-5p, hsa-miR-218-5p, hsa-miR-302d-3p, hsa-miR-30a-5p, hsa-miR-30b-5p, hsa-miR-30e-5p, hsa-miR-372-3p
MALAT1	MAPK1	hsa-let-7a-5p, hsa-let-7b-5p, hsa-miR-126-5p, hsa-miR-129-5p, hsa-miR-132-3p, hsa-miR-17-5p, hsa-miR-181a-5p, hsa-miR-197-3p, hsa-miR-199a-3p, hsa-miR-20a-5p, hsa-miR-214-3p, hsa-miR-28-5p, hsa-miR-320a, hsa-miR-329-3p, hsa-miR-335-5p, hsa-miR-377-3p, hsa-miR-378a-3p, hsa-miR-451a, hsa-miR-550a-3p, hsa-miR-9-3p
MALAT1	LIN28A	hsa-let-7a-5p, hsa-let-7b-5p, hsa-let-7e-5p, hsa-miR-107, hsa-miR-125a-5p, hsa-miR-125b-5p, hsa-miR-128-3p, hsa-miR-370-3p
MALAT1	ITPR1	hsa-miR-204-5p, hsa-miR-211-5p, hsa-miR-34b-3p, hsa-miR-34c-5p, hsa-miR-424-5p, hsa-miR-448, hsa-miR-449a, hsa-miR-494-3p
MALAT1	IGF1R	hsa-let-7a-5p, hsa-let-7b-5p, hsa-let-7c-5p, hsa-let-7e-5p, hsa-miR-125b-2-3p, hsa-miR-125b-5p, hsa-miR-133b, hsa-miR-138-5p, hsa-miR-139-5p, hsa-miR-140-5p, hsa-miR-141-3p, hsa-miR-143-3p, hsa-miR-145-5p, hsa-miR-148a-3p, hsa-miR-150-3p, hsa-miR-152-3p, hsa-miR-15b-3p, hsa-miR-16-5p, hsa-miR-181b-5p, hsa-miR-185-5p, hsa-miR-194-5p, hsa-miR-214-5p, hsa-miR-21-5p, hsa-miR-217, hsa-miR-223-3p, hsa-…
MALAT1	HIF1A	hsa-miR-106a-5p, hsa-miR-106b-5p, hsa-miR-107, hsa-miR-138-1-3p, hsa-miR-138-5p, hsa-miR-142-5p, hsa-miR-155-5p, hsa-miR-17-5p, hsa-miR-186-5p, hsa-miR-18a-5p, hsa-miR-18b-5p, hsa-miR-199a-5p, hsa-miR-199b-5p, hsa-miR-20a-5p, hsa-miR-20b-5p, hsa-miR-22-3p, hsa-miR-23b-3p, hsa-miR-27a-3p, hsa-miR-338-3p, hsa-miR-33a-5p, hsa-miR-382-5p, hsa-miR-424-5p, hsa-miR-429, hsa-miR-433-3p, hsa-miR-497-3p
MALAT1	ETS1	hsa-miR-124-3p, hsa-miR-125b-5p, hsa-miR-126-5p, hsa-miR-1-3p, hsa-miR-144-3p, hsa-miR-145-5p, hsa-miR-155-5p, hsa-miR-193b-3p, hsa-miR-199a-5p, hsa-miR-200b-3p, hsa-miR-200c-3p, hsa-miR-208a-3p, hsa-miR-221-3p, hsa-miR-222-3p, hsa-miR-23b-3p, hsa-miR-31-5p, hsa-miR-324-5p, hsa-miR-499a-5p, hsa-miR-506-3p, hsa-miR-9-5p
MALAT1	DNMT1	hsa-miR-140-5p, hsa-miR-148a-3p, hsa-miR-152-3p, hsa-miR-17-5p, hsa-miR-185-5p, hsa-miR-18a-5p, hsa-miR-19a-3p, hsa-miR-200a-3p, hsa-miR-200b-3p, hsa-miR-20a-5p, hsa-miR-217, hsa-miR-29a-3p, hsa-miR-29b-3p, hsa-miR-301b-3p, hsa-miR-30a-5p, hsa-miR-30b-5p, hsa-miR-30c-5p, hsa-miR-342-3p, hsa-miR-377-3p, hsa-miR-429, hsa-miR-92a-3p
MALAT1	CDK6	hsa-let-7a-5p, hsa-let-7b-5p, hsa-miR-103a-3p, hsa-miR-107, hsa-miR-124-3p, hsa-miR-129-2-3p, hsa-miR-129-5p, hsa-miR-137, hsa-miR-145-5p, hsa-miR-16-5p, hsa-miR-185-5p, hsa-miR-195-5p, hsa-miR-200a-3p, hsa-miR-211-5p, hsa-miR-214-3p, hsa-miR-214-5p, hsa-miR-218-5p, hsa-miR-26a-5p, hsa-miR-26b-5p, hsa-miR-29a-3p, hsa-miR-29b-3p, hsa-miR-29c-3p, hsa-miR-30a-3p, hsa-miR-320a, hsa-miR-340-5p, hsa-mi…
MALAT1	CCND2	hsa-let-7a-3p, hsa-let-7a-5p, hsa-let-7b-5p, hsa-miR-106b-5p, hsa-miR-124-3p, hsa-miR-146a-5p, hsa-miR-154-5p, hsa-miR-155-5p, hsa-miR-15a-5p, hsa-miR-16-1-3p, hsa-miR-16-5p, hsa-miR-17-5p, hsa-miR-182-5p, hsa-miR-198, hsa-miR-206, hsa-miR-20a-5p, hsa-miR-26a-5p, hsa-miR-29a-3p, hsa-miR-29b-3p, hsa-miR-29c-3p, hsa-miR-302b-3p, hsa-miR-302d-3p, hsa-miR-30c-5p, hsa-miR-340-5p, hsa-miR-603, hsa-miR-…
MALAT1	BCL2	hsa-miR-125a-5p, hsa-miR-125b-5p, hsa-miR-135a-5p, hsa-miR-136-5p, hsa-miR-139-5p, hsa-miR-141-3p, hsa-miR-143-3p, hsa-miR-148a-3p, hsa-miR-15a-3p, hsa-miR-15a-5p, hsa-miR-15b-5p, hsa-miR-16-1-3p, hsa-miR-16-5p, hsa-miR-17-5p, hsa-miR-181a-5p, hsa-miR-181b-5p, hsa-miR-181c-5p, hsa-miR-181d-5p, hsa-miR-182-5p, hsa-miR-18a-5p, hsa-miR-190b, hsa-miR-192-5p, hsa-miR-193a-3p, hsa-miR-195-5p, hsa-miR-2…
MAGI2-AS3	PPARGC1A	hsa-miR-130a-3p, hsa-miR-130b-3p, hsa-miR-23a-3p, hsa-miR-485-5p
MAGI2-AS3	NR3C2	hsa-miR-124-3p, hsa-miR-135a-5p, hsa-miR-301b-3p
MAGI2-AS3	LIMK1	hsa-miR-143-3p, hsa-miR-17-5p, hsa-miR-20a-5p, hsa-miR-20b-5p
MAGI2-AS3	XIAP	hsa-miR-130a-3p, hsa-miR-181a-5p, hsa-miR-186-5p, hsa-miR-23a-3p, hsa-miR-33b-5p, hsa-miR-4782-3p, hsa-miR-7-5p
MAGI2-AS3	ITGB8	hsa-miR-17-5p, hsa-miR-19b-1-5p, hsa-miR-20a-5p, hsa-miR-93-5p
MAGI2-AS3	HES1	hsa-miR-23a-3p, hsa-miR-410-3p, hsa-miR-9-3p, hsa-miR-9-5p
MAGI2-AS3	E2F6	hsa-let-7a-5p, hsa-miR-124-3p, hsa-miR-137, hsa-miR-27a-3p, hsa-miR-28-5p
LY86-AS1	PPP1R13B	hsa-miR-29a-3p, hsa-miR-29b-3p, hsa-miR-29c-3p
LY86-AS1	CDC42	hsa-miR-195-5p, hsa-miR-29a-3p, hsa-miR-29b-3p, hsa-miR-29c-3p
LY86-AS1	BCL2	hsa-miR-139-5p, hsa-miR-15a-5p, hsa-miR-15b-5p, hsa-miR-16-5p, hsa-miR-195-5p, hsa-miR-29a-3p, hsa-miR-29b-3p, hsa-miR-29c-3p, hsa-miR-34a-5p
LY86-AS1	AKT3	hsa-miR-15a-5p, hsa-miR-15b-5p, hsa-miR-16-5p, hsa-miR-29a-3p, hsa-miR-29b-3p, hsa-miR-29c-3p
LRRC75A-AS1	HMGB1	hsa-miR-142-3p, hsa-miR-205-5p, hsa-miR-21-5p, hsa-miR-218-5p, hsa-miR-22-3p, hsa-miR-320a, hsa-miR-34a-5p
LRRC75A-AS1	WNT1	hsa-let-7a-5p, hsa-miR-139-5p, hsa-miR-149-3p, hsa-miR-22-3p, hsa-miR-34a-5p
LRRC75A-AS1	IGF2BP1	hsa-let-7a-5p, hsa-let-7b-5p, hsa-let-7g-5p, hsa-miR-491-5p, hsa-miR-9-5p
LOXL1-AS1	SNAI2	hsa-miR-182-5p, hsa-miR-204-5p, hsa-miR-96-5p
LOXL1-AS1	TGFBR2	hsa-miR-204-5p, hsa-miR-211-5p, hsa-miR-27a-3p
LOXL1-AS1	SNAI1	hsa-miR-204-5p, hsa-miR-211-5p, hsa-miR-326
LOXL1-AS1	SP1	hsa-miR-27a-3p, hsa-miR-324-5p, hsa-miR-326
LOC648987	E2F1	hsa-miR-106a-5p, hsa-miR-106b-5p, hsa-miR-17-5p, hsa-miR-20a-5p, hsa-miR-93-5p
LOC648987	BCL2L11	hsa-miR-106b-5p, hsa-miR-17-5p, hsa-miR-20a-5p, hsa-miR-301a-3p, hsa-miR-301b-3p
LOC100506100	NRAS	hsa-let-7a-5p, hsa-let-7b-5p, hsa-miR-181a-5p
LOC100506100	HRAS	hsa-let-7a-5p, hsa-let-7b-5p, hsa-miR-143-3p, hsa-miR-181a-5p
LINC-PINT	EGFR	hsa-miR-132-3p, hsa-miR-135a-5p, hsa-miR-137, hsa-miR-7-5p
LINC01433	WEE1	hsa-miR-15a-5p, hsa-miR-15b-5p, hsa-miR-16-5p, hsa-miR-195-5p, hsa-miR-497-5p
LINC01433	YAP1	hsa-miR-15a-5p, hsa-miR-16-5p, hsa-miR-195-5p
LINC01433	VEGFA	hsa-miR-15a-5p, hsa-miR-15b-5p, hsa-miR-16-5p, hsa-miR-195-5p
LINC01433	BCL2	hsa-miR-15a-5p, hsa-miR-15b-5p, hsa-miR-16-5p, hsa-miR-195-5p, hsa-miR-497-5p
LINC01433	ACTB	hsa-miR-15a-5p, hsa-miR-15b-5p, hsa-miR-16-5p, hsa-miR-497-5p
LINC01420	CCNE1	hsa-miR-126-5p, hsa-miR-137, hsa-miR-26a-5p
LINC01420	PHB	hsa-miR-26a-5p, hsa-miR-27a-3p, hsa-miR-27b-3p
LINC01355	MYB	hsa-miR-15a-5p, hsa-miR-16-5p, hsa-miR-195-5p
LINC01355	CDK8	hsa-miR-101-3p, hsa-miR-195-5p, hsa-miR-26a-5p
LINC01355	RECK	hsa-miR-15a-5p, hsa-miR-15b-5p, hsa-miR-16-5p
LINC01355	PLAG1	hsa-miR-144-3p, hsa-miR-181a-5p, hsa-miR-26a-5p, hsa-miR-27a-3p, hsa-miR-375
LINC01355	MTOR	hsa-miR-101-3p, hsa-miR-144-3p, hsa-miR-16-5p, hsa-miR-199a-3p
LINC01355	MTDH	hsa-miR-26a-5p, hsa-miR-30a-5p, hsa-miR-375
LINC01355	MCL1	hsa-miR-101-3p, hsa-miR-181a-5p, hsa-miR-26a-5p, hsa-miR-30c-5p
LINC01355	MBNL1	hsa-miR-30a-5p, hsa-miR-30b-5p, hsa-miR-30e-5p
LINC01355	EZH2	hsa-miR-101-3p, hsa-miR-101-5p, hsa-miR-144-3p, hsa-miR-26a-5p, hsa-miR-30d-5p
LINC01355	CTNNB1	hsa-miR-101-3p, hsa-miR-181a-5p, hsa-miR-200a-5p, hsa-miR-375
LINC01355	CREB1	hsa-miR-27a-3p, hsa-miR-27b-3p, hsa-miR-33b-5p
LINC01355	BCL9	hsa-miR-30a-5p, hsa-miR-30b-5p, hsa-miR-30c-5p, hsa-miR-30d-5p
LINC01355	APP	hsa-miR-101-3p, hsa-miR-144-3p, hsa-miR-15a-5p, hsa-miR-16-5p
LINC01355	AKT3	hsa-miR-15a-5p, hsa-miR-15b-5p, hsa-miR-16-5p
LINC01351	CDC25A	hsa-miR-15a-5p, hsa-miR-195-5p, hsa-miR-497-5p
LINC01351	BIRC5	hsa-miR-16-5p, hsa-miR-195-5p, hsa-miR-497-5p
LINC01351	AKT3	hsa-miR-15a-5p, hsa-miR-15b-5p, hsa-miR-16-5p
LINC01314	RET	hsa-miR-15a-5p, hsa-miR-195-5p, hsa-miR-218-5p
LINC01314	IRS2	hsa-let-7b-5p, hsa-miR-135a-5p, hsa-miR-7-5p
LINC01314	PTK2	hsa-miR-135a-5p, hsa-miR-138-5p, hsa-miR-7-5p
LINC01314	MAPK1	hsa-let-7a-5p, hsa-let-7b-5p, hsa-miR-181a-5p
LINC01314	KRAS	hsa-let-7a-5p, hsa-let-7f-5p, hsa-let-7g-5p, hsa-miR-1-3p, hsa-miR-16-5p, hsa-miR-181a-5p
LINC01314	HRAS	hsa-let-7a-5p, hsa-let-7b-5p, hsa-miR-181a-5p
LINC01314	CCND2	hsa-let-7a-5p, hsa-let-7b-5p, hsa-miR-15a-5p, hsa-miR-16-5p
LINC01314	AXIN2	hsa-miR-107, hsa-miR-15b-5p, hsa-miR-16-5p
LINC01278	IGF1R	hsa-let-7a-5p, hsa-let-7b-5p, hsa-let-7e-5p, hsa-miR-143-3p
LINC01277	MPL	hsa-let-7a-5p, hsa-let-7d-5p, hsa-let-7e-5p, hsa-let-7f-5p
LINC01277	LIN28A	hsa-let-7a-5p, hsa-let-7b-5p, hsa-let-7e-5p
LINC01252	CHUK	hsa-miR-15a-5p, hsa-miR-15b-5p, hsa-miR-16-5p, hsa-miR-195-5p
LINC01252	TAB3	hsa-miR-15a-5p, hsa-miR-15b-5p, hsa-miR-16-5p, hsa-miR-195-5p
LINC01252	SMAD2	hsa-miR-15b-5p, hsa-miR-27a-3p, hsa-miR-27b-3p
LINC01252	RECK	hsa-miR-15a-5p, hsa-miR-15b-5p, hsa-miR-16-5p
LINC01252	PURA	hsa-miR-15a-5p, hsa-miR-15b-5p, hsa-miR-16-5p
LINC01252	BCL2	hsa-miR-15a-5p, hsa-miR-15b-5p, hsa-miR-16-5p, hsa-miR-195-5p
LINC01184	PTEN	hsa-miR-181a-5p, hsa-miR-221-3p, hsa-miR-26a-5p, hsa-miR-29a-3p, hsa-miR-29b-3p, hsa-miR-29c-3p
LINC01184	PIK3R1	hsa-miR-221-3p, hsa-miR-29a-3p, hsa-miR-29b-3p
LINC01184	NOTCH1	hsa-miR-181a-5p, hsa-miR-30b-5p, hsa-miR-30c-5p
LINC01184	MCL1	hsa-miR-181a-5p, hsa-miR-26a-5p, hsa-miR-29a-3p, hsa-miR-29b-3p, hsa-miR-29c-3p, hsa-miR-30c-5p
LINC01184	GSK3B	hsa-miR-26a-5p, hsa-miR-29a-3p, hsa-miR-29b-3p
LINC01184	DNMT3B	hsa-miR-26a-5p, hsa-miR-29a-3p, hsa-miR-29b-3p, hsa-miR-29c-3p
LINC01184	DNMT3A	hsa-miR-29a-3p, hsa-miR-29b-3p, hsa-miR-29c-3p
LINC01184	DNMT1	hsa-miR-185-5p, hsa-miR-29a-3p, hsa-miR-29b-3p, hsa-miR-30b-5p, hsa-miR-30c-5p
LINC01184	CDC42	hsa-miR-185-5p, hsa-miR-29a-3p, hsa-miR-29b-3p, hsa-miR-29c-3p, hsa-miR-30c-5p
LINC01184	BCL2	hsa-miR-181a-5p, hsa-miR-29a-3p, hsa-miR-29b-3p, hsa-miR-29c-3p, hsa-miR-30b-5p
LINC01184	AKT3	hsa-miR-29a-3p, hsa-miR-29b-3p, hsa-miR-29c-3p
LINC01128	TET2	hsa-miR-101-3p, hsa-miR-22-3p, hsa-miR-7-5p
LINC01128	SP1	hsa-miR-137, hsa-miR-149-5p, hsa-miR-22-3p, hsa-miR-24-3p
LINC01128	SMAD7	hsa-miR-25-3p, hsa-miR-33a-3p, hsa-miR-92b-3p
LINC01128	PHLPP2	hsa-miR-135a-5p, hsa-miR-3127-5p, hsa-miR-32-5p
LINC01128	NOTCH1	hsa-miR-101-3p, hsa-miR-24-3p, hsa-miR-363-3p, hsa-miR-9-5p
LINC01128	MTOR	hsa-miR-100-5p, hsa-miR-101-3p, hsa-miR-99a-5p, hsa-miR-99b-5p
LINC01128	FBXW7	hsa-miR-24-3p, hsa-miR-25-3p, hsa-miR-32-5p, hsa-miR-363-3p, hsa-miR-367-3p, hsa-miR-92a-3p
LINC01128	CREB1	hsa-miR-1224-5p, hsa-miR-363-3p, hsa-miR-9-5p
LINC01128	BMPR2	hsa-miR-100-5p, hsa-miR-135a-5p, hsa-miR-92a-3p
LINC01116	GNAI1	hsa-miR-320a, hsa-miR-320c, hsa-miR-320d
LINC01105	MDM2	hsa-miR-143-3p, hsa-miR-17-5p, hsa-miR-26a-5p
LINC01105	MAPK9	hsa-miR-17-5p, hsa-miR-20b-5p, hsa-miR-93-5p
LINC01105	HMGB1	hsa-miR-218-5p, hsa-miR-22-3p, hsa-miR-320a
LINC01105	CCND1	hsa-miR-135a-5p, hsa-miR-1-3p, hsa-miR-17-5p, hsa-miR-19a-3p, hsa-miR-365a-3p, hsa-miR-708-5p
LINC01105	PELI1	hsa-miR-17-5p, hsa-miR-19a-3p, hsa-miR-19b-3p, hsa-miR-93-5p
LINC01105	E2F1	hsa-miR-124-3p, hsa-miR-135a-5p, hsa-miR-17-5p, hsa-miR-93-5p
LINC01105	CDK4	hsa-miR-124-3p, hsa-miR-135a-5p, hsa-miR-1-3p
LINC01105	YOD1	hsa-miR-17-5p, hsa-miR-19a-3p, hsa-miR-19b-3p, hsa-miR-93-5p
LINC01105	TP53INP1	hsa-miR-17-5p, hsa-miR-19a-3p, hsa-miR-93-5p
LINC01105	KRAS	hsa-miR-1-3p, hsa-miR-143-3p, hsa-miR-181a-5p, hsa-miR-365a-3p
LINC01105	HDAC4	hsa-miR-1-3p, hsa-miR-22-3p, hsa-miR-30c-5p
LINC01105	EZH2	hsa-miR-124-3p, hsa-miR-185-5p, hsa-miR-26a-5p, hsa-miR-708-5p
LINC01102	CCND1	hsa-let-7b-5p, hsa-let-7e-5p, hsa-let-7f-5p, hsa-miR-101-3p, hsa-miR-135a-5p, hsa-miR-34a-5p, hsa-miR-365a-3p, hsa-miR-708-5p
LINC01102	STMN1	hsa-miR-101-3p, hsa-miR-221-3p, hsa-miR-34a-5p
LINC01102	E2F1	hsa-let-7a-5p, hsa-miR-135a-5p, hsa-miR-34a-5p
LINC01102	CDK4	hsa-let-7a-5p, hsa-miR-135a-5p, hsa-miR-34a-5p
LINC01102	CDC25A	hsa-let-7b-5p, hsa-miR-34a-5p, hsa-miR-365a-3p
LINC01102	ZEB2	hsa-miR-101-3p, hsa-miR-221-3p, hsa-miR-708-5p
LINC01102	MYCN	hsa-let-7e-5p, hsa-miR-101-3p, hsa-miR-34a-5p
LINC01102	KRAS	hsa-let-7a-5p, hsa-let-7f-5p, hsa-let-7g-5p, hsa-miR-181a-5p, hsa-miR-365a-3p
LINC01102	EZH2	hsa-let-7a-5p, hsa-let-7b-5p, hsa-let-7e-5p, hsa-miR-101-3p, hsa-miR-708-5p
LINC01091	CASP3	hsa-miR-30c-5p, hsa-miR-30d-5p, hsa-miR-30e-5p
LINC01089	CCND1	hsa-let-7b-5p, hsa-let-7e-5p, hsa-let-7f-5p, hsa-miR-196a-5p, hsa-miR-27a-3p
LINC01089	AURKB	hsa-let-7a-5p, hsa-let-7e-5p, hsa-let-7i-5p
LINC01089	PIK3CA	hsa-let-7b-5p, hsa-miR-124-3p, hsa-miR-148b-3p
LINC01089	KRAS	hsa-let-7a-5p, hsa-let-7f-5p, hsa-let-7g-5p, hsa-miR-27a-3p
LINC01089	E2F6	hsa-let-7a-5p, hsa-miR-124-3p, hsa-miR-27a-3p
LINC01021	CCND1	hsa-miR-27a-3p, hsa-miR-425-5p, hsa-miR-576-3p
LINC01021	SMAD2	hsa-miR-27a-3p, hsa-miR-27b-3p, hsa-miR-425-5p
LINC01004	HOXA5	hsa-miR-130a-3p, hsa-miR-19a-3p, hsa-miR-26a-5p
LINC01004	CHEK1	hsa-miR-15a-5p, hsa-miR-15b-5p, hsa-miR-16-5p, hsa-miR-195-5p, hsa-miR-26a-5p, hsa-miR-424-5p, hsa-miR-497-5p
LINC01004	TNF	hsa-miR-125b-5p, hsa-miR-130a-3p, hsa-miR-143-3p, hsa-miR-19a-3p
LINC01004	SMURF1	hsa-miR-140-5p, hsa-miR-15b-5p, hsa-miR-497-5p
LINC01004	ROCK1	hsa-miR-124-3p, hsa-miR-130a-3p, hsa-miR-148a-3p, hsa-miR-148b-3p
LINC01004	RAF1	hsa-miR-125a-5p, hsa-miR-125b-5p, hsa-miR-16-5p, hsa-miR-195-5p, hsa-miR-497-5p
LINC01004	IKBKB	hsa-miR-148a-3p, hsa-miR-199a-5p, hsa-miR-218-5p, hsa-miR-28-5p, hsa-miR-497-5p
LINC01004	HDAC4	hsa-miR-125a-5p, hsa-miR-1-3p, hsa-miR-140-5p, hsa-miR-30c-5p, hsa-miR-9-5p
LINC01004	GSK3B	hsa-miR-182-5p, hsa-miR-199a-5p, hsa-miR-26a-5p, hsa-miR-616-5p, hsa-miR-9-5p, hsa-miR-96-5p
LINC01004	FGF9	hsa-miR-140-5p, hsa-miR-182-5p, hsa-miR-26a-5p
LINC01004	EZH2	hsa-miR-124-3p, hsa-miR-137, hsa-miR-199a-5p, hsa-miR-26a-5p, hsa-miR-26b-5p, hsa-miR-708-5p
LINC01004	ETS1	hsa-miR-124-3p, hsa-miR-125b-5p, hsa-miR-126-5p, hsa-miR-1-3p, hsa-miR-193b-3p, hsa-miR-199a-5p, hsa-miR-23b-3p, hsa-miR-9-5p
LINC01004	E2F6	hsa-miR-124-3p, hsa-miR-137, hsa-miR-28-5p
LINC01004	DICER1	hsa-miR-103a-3p, hsa-miR-107, hsa-miR-130a-3p, hsa-miR-130b-3p, hsa-miR-154-5p, hsa-miR-18a-5p, hsa-miR-195-5p, hsa-miR-497-5p, hsa-miR-9-5p
LINC01004	BCL2L11	hsa-miR-10a-5p, hsa-miR-148a-3p, hsa-miR-19a-3p, hsa-miR-19b-3p, hsa-miR-301a-3p, hsa-miR-9-5p
LINC01004	ATXN1	hsa-miR-130a-3p, hsa-miR-19a-3p, hsa-miR-19b-3p
LINC00969	WASF3	hsa-miR-200b-3p, hsa-miR-218-5p, hsa-miR-429
LINC00969	HMGB1	hsa-miR-129-5p, hsa-miR-218-5p, hsa-miR-22-3p, hsa-miR-34a-5p
LINC00969	CDKN1B	hsa-miR-148a-3p, hsa-miR-196a-5p, hsa-miR-200b-3p, hsa-miR-218-5p, hsa-miR-24-3p
LINC00969	ZFPM2	hsa-miR-200b-3p, hsa-miR-200c-3p, hsa-miR-429
LINC00969	YOD1	hsa-miR-17-3p, hsa-miR-18a-5p, hsa-miR-19a-3p, hsa-miR-19b-3p
LINC00969	WNK1	hsa-miR-141-5p, hsa-miR-199a-5p, hsa-miR-27a-3p
LINC00969	TCF7L1	hsa-miR-200b-3p, hsa-miR-200c-3p, hsa-miR-429
LINC00969	SUZ12	hsa-miR-19a-3p, hsa-miR-200b-3p, hsa-miR-200c-3p
LINC00969	SMAD4	hsa-miR-130a-3p, hsa-miR-130b-3p, hsa-miR-18a-5p, hsa-miR-199a-5p, hsa-miR-19a-3p, hsa-miR-19b-3p, hsa-miR-27a-3p, hsa-miR-301a-3p, hsa-miR-34a-5p
LINC00969	SMAD2	hsa-miR-145-5p, hsa-miR-148a-3p, hsa-miR-15b-5p, hsa-miR-18a-5p, hsa-miR-18b-5p, hsa-miR-200b-3p, hsa-miR-27a-3p, hsa-miR-27b-3p, hsa-miR-425-5p
LINC00969	SIRT1	hsa-miR-199a-5p, hsa-miR-199b-5p, hsa-miR-200c-3p, hsa-miR-217, hsa-miR-22-3p, hsa-miR-34a-5p, hsa-miR-543
LINC00969	RPS6KB1	hsa-miR-145-5p, hsa-miR-16-5p, hsa-miR-195-5p, hsa-miR-200c-3p, hsa-miR-218-5p, hsa-miR-497-5p
LINC00969	RICTOR	hsa-miR-16-5p, hsa-miR-218-5p, hsa-miR-34a-5p
LINC00969	RBFOX2	hsa-miR-22-3p, hsa-miR-320b, hsa-miR-320d
LINC00969	RAF1	hsa-miR-139-5p, hsa-miR-16-5p, hsa-miR-195-5p, hsa-miR-497-5p, hsa-miR-7-1-3p
LINC00969	PURA	hsa-miR-15a-5p, hsa-miR-15b-5p, hsa-miR-16-5p
LINC00969	PTPRD	hsa-miR-200b-3p, hsa-miR-200c-3p, hsa-miR-429
LINC00969	PHLPP1	hsa-miR-15a-5p, hsa-miR-18a-5p, hsa-miR-19a-3p, hsa-miR-200b-3p
LINC00969	NOTCH1	hsa-miR-129-5p, hsa-miR-139-5p, hsa-miR-200b-3p, hsa-miR-200c-3p, hsa-miR-24-3p, hsa-miR-27b-3p, hsa-miR-34a-5p
LINC00969	IGF1R	hsa-miR-125b-2-3p, hsa-miR-139-5p, hsa-miR-145-5p, hsa-miR-148a-3p, hsa-miR-16-5p, hsa-miR-217, hsa-miR-497-5p, hsa-miR-7-1-3p
LINC00969	ERBB2IP	hsa-miR-200b-3p, hsa-miR-200c-3p, hsa-miR-429
LINC00969	DNMT1	hsa-miR-148a-3p, hsa-miR-18a-5p, hsa-miR-19a-3p, hsa-miR-19b-3p, hsa-miR-200b-3p, hsa-miR-217, hsa-miR-342-3p, hsa-miR-429
LINC00969	DICER1	hsa-miR-130a-3p, hsa-miR-130b-3p, hsa-miR-18a-5p, hsa-miR-195-5p, hsa-miR-200c-3p, hsa-miR-497-5p
LINC00969	CRKL	hsa-miR-15a-5p, hsa-miR-200b-3p, hsa-miR-200c-3p, hsa-miR-429
LINC00969	BTRC	hsa-miR-10a-3p, hsa-miR-195-5p, hsa-miR-497-5p
LINC00963	CCKAR	hsa-miR-148a-3p, hsa-miR-22-3p, hsa-miR-339-5p
LINC00963	HOXA10	hsa-miR-130a-3p, hsa-miR-135a-5p, hsa-miR-192-5p, hsa-miR-196a-5p
LINC00963	MMP13	hsa-miR-125b-5p, hsa-miR-143-3p, hsa-miR-9-5p
LINC00963	IL6	hsa-let-7a-5p, hsa-let-7c-5p, hsa-let-7f-5p, hsa-miR-9-5p, hsa-miR-98-5p
LINC00963	TNFRSF10B	hsa-let-7a-5p, hsa-let-7b-5p, hsa-let-7c-5p, hsa-let-7d-5p, hsa-let-7e-5p, hsa-let-7g-5p
LINC00963	TNFAIP3	hsa-let-7a-5p, hsa-let-7e-5p, hsa-miR-125a-5p, hsa-miR-125b-5p, hsa-miR-19a-5p
LINC00963	TGFBR2	hsa-miR-130a-3p, hsa-miR-17-5p, hsa-miR-196a-5p, hsa-miR-196b-5p, hsa-miR-520a-3p, hsa-miR-655-3p, hsa-miR-93-5p, hsa-miR-9-5p
LINC00963	TGFBR1	hsa-let-7b-5p, hsa-let-7c-5p, hsa-let-7g-5p, hsa-miR-135b-5p, hsa-miR-181a-5p
LINC00963	RUNX1	hsa-miR-17-5p, hsa-miR-181a-5p, hsa-miR-378a-3p, hsa-miR-9-5p
LINC00963	MAFB	hsa-miR-130a-3p, hsa-miR-135b-5p, hsa-miR-148a-3p, hsa-miR-152-3p, hsa-miR-425-5p
LINC00963	LIMK1	hsa-miR-143-3p, hsa-miR-17-5p, hsa-miR-20b-5p
LINC00963	KLF4	hsa-miR-130a-3p, hsa-miR-135a-5p, hsa-miR-135b-5p, hsa-miR-152-3p, hsa-miR-34a-5p
LINC00963	JAK2	hsa-miR-125a-5p, hsa-miR-125b-5p, hsa-miR-135a-5p
LINC00963	ITGB3	hsa-let-7a-5p, hsa-let-7c-5p, hsa-miR-192-5p, hsa-miR-98-5p
LINC00963	ESR1	hsa-miR-130a-3p, hsa-miR-192-5p, hsa-miR-193b-3p, hsa-miR-20b-5p, hsa-miR-22-3p
LINC00963	CSF1	hsa-miR-130a-3p, hsa-miR-148b-3p, hsa-miR-152-3p
LINC00963	TUSC2	hsa-miR-378a-3p, hsa-miR-378a-5p, hsa-miR-93-5p, hsa-miR-98-5p
LINC00963	RGS2	hsa-miR-148a-3p, hsa-miR-22-3p, hsa-miR-339-5p
LINC00963	PRDM1	hsa-let-7a-5p, hsa-let-7b-5p, hsa-let-7f-5p, hsa-miR-125b-5p, hsa-miR-9-5p
LINC00963	PLAU	hsa-miR-143-3p, hsa-miR-181a-5p, hsa-miR-193b-3p
LINC00963	CYP19A1	hsa-let-7f-5p, hsa-miR-378a-3p, hsa-miR-98-5p
LINC00963	CD44	hsa-miR-125b-5p, hsa-miR-143-3p, hsa-miR-34a-5p, hsa-miR-520a-3p, hsa-miR-520c-3p
LINC00963	CASP8	hsa-let-7a-5p, hsa-miR-19b-1-5p, hsa-miR-296-5p
LINC00963	CASP3	hsa-let-7a-5p, hsa-let-7c-5p, hsa-let-7g-5p, hsa-miR-421, hsa-miR-582-5p, hsa-miR-98-5p
LINC00963	ATG5	hsa-miR-181a-5p, hsa-miR-34a-5p, hsa-miR-9-5p
LINC00963	ACVR1	hsa-let-7b-5p, hsa-miR-148a-3p, hsa-miR-148b-3p
LINC00958	WEE1	hsa-miR-106b-5p, hsa-miR-17-5p, hsa-miR-20a-5p, hsa-miR-27a-3p, hsa-miR-27b-3p, hsa-miR-372-3p
LINC00958	PIM1	hsa-miR-1-3p, hsa-miR-210-3p, hsa-miR-33a-5p, hsa-miR-33b-5p, hsa-miR-542-3p
LINC00958	LDHA	hsa-miR-200b-3p, hsa-miR-210-3p, hsa-miR-24-3p, hsa-miR-374a-5p
LINC00958	CLIC4	hsa-miR-106b-5p, hsa-miR-122-5p, hsa-miR-146a-5p, hsa-miR-17-5p, hsa-miR-18a-5p, hsa-miR-19a-3p, hsa-miR-19b-3p, hsa-miR-20a-5p, hsa-miR-93-5p
LINC00958	YAP1	hsa-miR-138-5p, hsa-miR-199a-3p, hsa-miR-27a-3p, hsa-miR-375, hsa-miR-506-3p
LINC00958	VIM	hsa-miR-129-5p, hsa-miR-138-5p, hsa-miR-196a-5p, hsa-miR-200c-3p, hsa-miR-204-5p, hsa-miR-217, hsa-miR-378a-3p, hsa-miR-506-3p, hsa-miR-9-5p
LINC00958	TGFBR2	hsa-miR-106a-5p, hsa-miR-130a-3p, hsa-miR-142-5p, hsa-miR-145-5p, hsa-miR-17-5p, hsa-miR-181c-5p, hsa-miR-18a-5p, hsa-miR-196a-5p, hsa-miR-19a-3p, hsa-miR-19b-3p, hsa-miR-202-5p, hsa-miR-204-5p, hsa-miR-20a-5p, hsa-miR-211-5p, hsa-miR-21-5p, hsa-miR-27a-3p, hsa-miR-302b-3p, hsa-miR-302d-3p, hsa-miR-370-3p, hsa-miR-372-3p, hsa-miR-373-3p, hsa-miR-520a-3p, hsa-miR-590-5p, hsa-miR-93-5p, hsa-miR-9-5p
LINC00958	SPRY2	hsa-miR-122-5p, hsa-miR-21-5p, hsa-miR-27a-3p, hsa-miR-27b-3p
LINC00958	SHC1	hsa-miR-200b-3p, hsa-miR-200c-3p, hsa-miR-27b-3p, hsa-miR-365a-3p, hsa-miR-429
LINC00958	RUNX1	hsa-miR-106a-5p, hsa-miR-17-5p, hsa-miR-181a-5p, hsa-miR-18a-5p, hsa-miR-20a-5p, hsa-miR-27b-3p, hsa-miR-378a-3p, hsa-miR-9-5p
LINC00958	NRP2	hsa-miR-196a-5p, hsa-miR-331-3p, hsa-miR-486-5p
LINC00958	MET	hsa-miR-1-3p, hsa-miR-181a-5p, hsa-miR-199a-3p, hsa-miR-206, hsa-miR-27a-3p, hsa-miR-27b-3p, hsa-miR-31-5p, hsa-miR-340-5p, hsa-miR-433-3p
LINC00958	LIMK1	hsa-miR-106a-5p, hsa-miR-17-5p, hsa-miR-20a-5p, hsa-miR-20b-5p
LINC00958	LDLR	hsa-miR-130b-3p, hsa-miR-17-5p, hsa-miR-27a-3p, hsa-miR-27b-3p
LINC00958	LATS2	hsa-miR-181b-5p, hsa-miR-181c-5p, hsa-miR-31-5p, hsa-miR-372-3p, hsa-miR-373-3p, hsa-miR-93-5p
LINC00958	IRS2	hsa-miR-135a-5p, hsa-miR-145-5p, hsa-miR-33a-5p, hsa-miR-7-5p
LINC00958	IRF2	hsa-miR-18a-5p, hsa-miR-20a-5p, hsa-miR-520c-3p
LINC00958	ICAM1	hsa-miR-146a-5p, hsa-miR-17-5p, hsa-miR-21-5p, hsa-miR-296-3p, hsa-miR-31-5p
LINC00958	GADD45A	hsa-miR-138-5p, hsa-miR-370-3p, hsa-miR-374a-5p
LINC00958	DPYD	hsa-miR-27a-3p, hsa-miR-27b-3p, hsa-miR-302b-3p
LINC00958	DLC1	hsa-miR-200b-3p, hsa-miR-200c-3p, hsa-miR-429
LINC00958	CXCR4	hsa-miR-146a-5p, hsa-miR-150-5p, hsa-miR-204-5p, hsa-miR-494-3p, hsa-miR-9-5p
LINC00958	BDNF	hsa-miR-1-3p, hsa-miR-182-5p, hsa-miR-204-5p, hsa-miR-210-3p, hsa-miR-339-5p, hsa-miR-613, hsa-miR-96-5p
LINC00958	VEGFA	hsa-miR-106a-5p, hsa-miR-106b-5p, hsa-miR-1-3p, hsa-miR-140-5p, hsa-miR-145-5p, hsa-miR-146a-5p, hsa-miR-150-5p, hsa-miR-17-5p, hsa-miR-181a-5p, hsa-miR-185-5p, hsa-miR-186-5p, hsa-miR-199a-3p, hsa-miR-200b-3p, hsa-miR-200c-3p, hsa-miR-206, hsa-miR-20a-5p, hsa-miR-20b-5p, hsa-miR-21-5p, hsa-miR-27b-3p, hsa-miR-302d-3p, hsa-miR-326, hsa-miR-372-3p, hsa-miR-373-3p, hsa-miR-374b-5p, hsa-miR-378a-3p,…
LINC00958	TIMP1	hsa-miR-145-5p, hsa-miR-181a-5p, hsa-miR-218-5p, hsa-miR-96-5p
LINC00958	TGFB1	hsa-miR-130a-3p, hsa-miR-146a-5p, hsa-miR-185-5p, hsa-miR-211-5p, hsa-miR-24-3p, hsa-miR-422a
LINC00958	SREBF1	hsa-miR-185-5p, hsa-miR-33a-5p, hsa-miR-342-3p
LINC00958	SOCS1	hsa-miR-122-5p, hsa-miR-142-5p, hsa-miR-19a-3p, hsa-miR-19b-3p, hsa-miR-21-5p
LINC00958	RAP1B	hsa-miR-100-5p, hsa-miR-181a-5p, hsa-miR-181b-5p, hsa-miR-181c-5p, hsa-miR-181d-5p
LINC00958	MAP2K3	hsa-miR-20a-5p, hsa-miR-21-5p, hsa-miR-27a-3p
LINC00958	HMOX1	hsa-miR-122-5p, hsa-miR-196a-5p, hsa-miR-218-5p, hsa-miR-24-3p
LINC00958	HIPK3	hsa-miR-106a-5p, hsa-miR-19b-3p, hsa-miR-20b-5p
LINC00958	GJA1	hsa-miR-1298-5p, hsa-miR-130a-3p, hsa-miR-1-3p, hsa-miR-186-5p, hsa-miR-206, hsa-miR-20a-5p, hsa-miR-218-5p
LINC00958	FZD7	hsa-miR-1-3p, hsa-miR-145-5p, hsa-miR-27b-3p, hsa-miR-485-5p, hsa-miR-542-3p
LINC00958	EPAS1	hsa-miR-145-5p, hsa-miR-17-5p, hsa-miR-185-5p, hsa-miR-20a-5p
LINC00958	CLIP1	hsa-miR-106b-5p, hsa-miR-146a-5p, hsa-miR-17-5p, hsa-miR-18a-5p, hsa-miR-19a-3p, hsa-miR-19b-3p, hsa-miR-20a-5p, hsa-miR-93-5p
LINC00958	CDKN1A	hsa-miR-106a-5p, hsa-miR-106b-5p, hsa-miR-135a-5p, hsa-miR-145-5p, hsa-miR-146a-5p, hsa-miR-146b-5p, hsa-miR-17-5p, hsa-miR-181a-5p, hsa-miR-182-5p, hsa-miR-18a-5p, hsa-miR-196a-5p, hsa-miR-19a-3p, hsa-miR-19b-3p, hsa-miR-20a-5p, hsa-miR-20b-5p, hsa-miR-302a-3p, hsa-miR-372-3p, hsa-miR-4295, hsa-miR-519d-3p, hsa-miR-520a-3p, hsa-miR-520b, hsa-miR-7-5p, hsa-miR-93-5p, hsa-miR-96-5p
LINC00958	CCNG1	hsa-miR-122-5p, hsa-miR-1271-5p, hsa-miR-27b-3p, hsa-miR-9-5p
LINC00958	CASP7	hsa-miR-106a-5p, hsa-miR-106b-5p, hsa-miR-146a-5p
LINC00957	MAPK9	hsa-miR-17-5p, hsa-miR-20b-5p, hsa-miR-93-5p
LINC00943	PHLPP1	hsa-miR-141-3p, hsa-miR-15a-5p, hsa-miR-375
LINC00894	RDX	hsa-miR-196a-5p, hsa-miR-196b-5p, hsa-miR-31-5p
LINC00894	NOD2	hsa-miR-10a-5p, hsa-miR-122-5p, hsa-miR-320a, hsa-miR-320b, hsa-miR-320c
LINC00894	KLF4	hsa-miR-10b-5p, hsa-miR-128-3p, hsa-miR-130a-3p, hsa-miR-135a-5p, hsa-miR-135b-5p, hsa-miR-145-5p, hsa-miR-34a-5p, hsa-miR-367-3p, hsa-miR-7-5p
LINC00894	SUZ12	hsa-miR-128-3p, hsa-miR-138-5p, hsa-miR-19a-3p, hsa-miR-320a
LINC00894	STAT5B	hsa-miR-134-5p, hsa-miR-150-5p, hsa-miR-182-3p, hsa-miR-28-5p
LINC00894	SREBF1	hsa-miR-10b-5p, hsa-miR-128-3p, hsa-miR-185-5p, hsa-miR-342-3p
LINC00894	SP1	hsa-miR-129-5p, hsa-miR-133b, hsa-miR-145-5p, hsa-miR-149-5p, hsa-miR-150-5p, hsa-miR-218-5p, hsa-miR-24-3p, hsa-miR-324-5p, hsa-miR-326
LINC00894	RPS6KB1	hsa-miR-122-5p, hsa-miR-145-5p, hsa-miR-218-5p, hsa-miR-382-5p, hsa-miR-497-5p
LINC00894	RICTOR	hsa-let-7c-5p, hsa-miR-128-3p, hsa-miR-218-5p, hsa-miR-34a-5p
LINC00894	PTK2	hsa-miR-135a-5p, hsa-miR-138-5p, hsa-miR-193a-3p, hsa-miR-7-5p
LINC00894	NFATC3	hsa-miR-185-5p, hsa-miR-30a-3p, hsa-miR-320a
LINC00894	NANOG	hsa-miR-128-3p, hsa-miR-134-5p, hsa-miR-145-5p, hsa-miR-150-5p, hsa-miR-34a-5p, hsa-miR-34c-5p
LINC00894	MXD1	hsa-miR-138-5p, hsa-miR-19a-3p, hsa-miR-19b-3p, hsa-miR-382-5p
LINC00894	MECP2	hsa-miR-122-5p, hsa-miR-130a-3p, hsa-miR-19a-3p, hsa-miR-30a-3p, hsa-miR-340-5p
LINC00894	ITPR1	hsa-miR-204-5p, hsa-miR-34c-5p, hsa-miR-424-5p, hsa-miR-449a
LINC00894	CUL5	hsa-miR-19a-3p, hsa-miR-19b-3p, hsa-miR-7-5p
LINC00894	ATXN1	hsa-miR-130a-3p, hsa-miR-19a-3p, hsa-miR-19b-3p
LINC00887	TGFBR2	hsa-miR-106a-5p, hsa-miR-17-5p, hsa-miR-20a-5p, hsa-miR-302d-3p, hsa-miR-372-3p, hsa-miR-93-5p
LINC00887	RHOC	hsa-miR-106b-5p, hsa-miR-372-3p, hsa-miR-93-5p
LINC00887	LY75	hsa-miR-106b-5p, hsa-miR-17-5p, hsa-miR-20a-5p, hsa-miR-93-5p
LINC00882	MEF2C	hsa-miR-21-5p, hsa-miR-223-3p, hsa-miR-23a-3p
LINC00847	EGFR	hsa-miR-125a-5p, hsa-miR-125b-5p, hsa-miR-137
LINC00847	CDKN1A	hsa-miR-125a-5p, hsa-miR-181a-5p, hsa-miR-34a-5p, hsa-miR-423-3p
LINC00839	CHUK	hsa-miR-15a-5p, hsa-miR-15b-5p, hsa-miR-16-5p, hsa-miR-195-5p
LINC00839	CCND1	hsa-miR-15a-5p, hsa-miR-15b-5p, hsa-miR-16-5p, hsa-miR-195-5p, hsa-miR-24-3p
LINC00839	MYB	hsa-miR-15a-5p, hsa-miR-16-5p, hsa-miR-195-5p
LINC00839	BMI1	hsa-miR-15a-3p, hsa-miR-15a-5p, hsa-miR-16-5p
LINC00839	AKT3	hsa-miR-15a-5p, hsa-miR-15b-5p, hsa-miR-16-5p
LINC00690	RAP1B	hsa-miR-181a-5p, hsa-miR-181b-5p, hsa-miR-181c-5p, hsa-miR-181d-5p
LINC00689	PIK3R1	hsa-miR-155-5p, hsa-miR-376a-3p, hsa-miR-487a-3p, hsa-miR-542-3p
LINC00665	EGFR	hsa-miR-132-3p, hsa-miR-219a-5p, hsa-miR-27a-3p, hsa-miR-27b-3p, hsa-miR-491-5p
LINC00665	SMAD4	hsa-miR-182-5p, hsa-miR-18a-5p, hsa-miR-204-5p, hsa-miR-27a-3p, hsa-miR-301a-3p
LINC00665	RB1	hsa-miR-132-3p, hsa-miR-182-5p, hsa-miR-212-3p, hsa-miR-335-5p
LINC00665	NTRK3	hsa-miR-148a-3p, hsa-miR-185-5p, hsa-miR-330-5p, hsa-miR-384
LINC00665	DNMT1	hsa-miR-148a-3p, hsa-miR-185-5p, hsa-miR-18a-5p, hsa-miR-342-3p, hsa-miR-377-3p
LINC00665	CREB5	hsa-miR-182-5p, hsa-miR-204-5p, hsa-miR-211-5p
LINC00662	HMGB1	hsa-miR-153-3p, hsa-miR-200a-3p, hsa-miR-218-5p, hsa-miR-34a-5p
LINC00662	TDG	hsa-miR-26a-5p, hsa-miR-29b-3p, hsa-miR-29c-3p
LINC00662	STMN1	hsa-miR-101-3p, hsa-miR-210-3p, hsa-miR-34a-5p, hsa-miR-9-5p
LINC00662	RAD51	hsa-miR-103a-3p, hsa-miR-107, hsa-miR-34a-5p
LINC00662	MYB	hsa-miR-103a-3p, hsa-miR-107, hsa-miR-15a-5p, hsa-miR-16-5p, hsa-miR-195-5p, hsa-miR-200a-3p, hsa-miR-34a-5p, hsa-miR-424-5p, hsa-miR-503-5p
LINC00662	HMGCR	hsa-miR-27a-3p, hsa-miR-29b-3p, hsa-miR-29c-3p
LINC00662	CDK8	hsa-miR-101-3p, hsa-miR-107, hsa-miR-195-5p, hsa-miR-26a-5p
LINC00662	CDK4	hsa-miR-122-5p, hsa-miR-1-3p, hsa-miR-195-5p, hsa-miR-24-3p, hsa-miR-34a-5p, hsa-miR-34c-5p, hsa-miR-497-5p, hsa-miR-613
LINC00662	CDC25A	hsa-miR-141-3p, hsa-miR-15a-5p, hsa-miR-195-5p, hsa-miR-34a-5p, hsa-miR-424-5p, hsa-miR-497-5p, hsa-miR-503-5p
LINC00662	CCNE2	hsa-miR-141-3p, hsa-miR-200a-3p, hsa-miR-26a-5p, hsa-miR-34a-5p, hsa-miR-34c-5p, hsa-miR-503-5p
LINC00662	CCNA2	hsa-miR-132-3p, hsa-miR-146a-5p, hsa-miR-24-3p, hsa-miR-27b-3p
LINC00662	ZEB1	hsa-miR-101-3p, hsa-miR-141-3p, hsa-miR-144-3p, hsa-miR-200a-3p, hsa-miR-23b-3p, hsa-miR-33b-5p
LINC00662	SOX5	hsa-miR-132-3p, hsa-miR-15a-5p, hsa-miR-16-5p
LINC00662	SOX2	hsa-miR-128-3p, hsa-miR-146a-5p, hsa-miR-340-5p, hsa-miR-34a-5p, hsa-miR-34c-5p, hsa-miR-371a-5p
LINC00662	RICTOR	hsa-miR-128-3p, hsa-miR-16-5p, hsa-miR-218-5p, hsa-miR-34a-5p
LINC00662	PPM1D	hsa-miR-153-3p, hsa-miR-15b-5p, hsa-miR-16-5p, hsa-miR-217
LINC00662	PHB	hsa-miR-26a-5p, hsa-miR-27a-3p, hsa-miR-27b-3p
LINC00662	PDGFRA	hsa-miR-146b-5p, hsa-miR-218-5p, hsa-miR-29b-3p, hsa-miR-34a-5p, hsa-miR-34c-5p
LINC00662	MYCN	hsa-miR-101-3p, hsa-miR-103a-3p, hsa-miR-29b-3p, hsa-miR-29c-3p, hsa-miR-34a-5p, hsa-miR-34c-5p, hsa-miR-375
LINC00662	LDHB	hsa-miR-210-3p, hsa-miR-23a-3p, hsa-miR-24-3p, hsa-miR-375
LINC00662	EZH2	hsa-miR-101-3p, hsa-miR-138-5p, hsa-miR-144-3p, hsa-miR-200a-3p, hsa-miR-217, hsa-miR-26a-5p, hsa-miR-26b-5p
LINC00662	ELAVL1	hsa-miR-146a-5p, hsa-miR-23c, hsa-miR-296-5p, hsa-miR-29b-3p, hsa-miR-9-5p
LINC00662	CREB1	hsa-miR-103a-3p, hsa-miR-122-5p, hsa-miR-27a-3p, hsa-miR-27b-3p, hsa-miR-33b-5p, hsa-miR-433-3p, hsa-miR-582-5p, hsa-miR-9-5p
LINC00662	BIRC5	hsa-miR-16-5p, hsa-miR-195-5p, hsa-miR-218-5p, hsa-miR-335-5p, hsa-miR-34a-5p, hsa-miR-497-5p
LINC00662	ATG4C	hsa-miR-34a-5p, hsa-miR-376a-3p, hsa-miR-376b-3p
LINC00662	AKT3	hsa-miR-122-5p, hsa-miR-15a-5p, hsa-miR-15b-5p, hsa-miR-16-5p, hsa-miR-29b-3p, hsa-miR-29c-3p
LINC00649	HMGA2	hsa-let-7a-5p, hsa-let-7c-5p, hsa-miR-98-5p
LINC00645	CCND1	hsa-miR-141-3p, hsa-miR-145-5p, hsa-miR-200a-3p
LINC00643	CDH1	hsa-miR-132-3p, hsa-miR-26a-5p, hsa-miR-9-5p
LINC00643	SIRT1	hsa-miR-124-3p, hsa-miR-132-3p, hsa-miR-9-5p
LINC00643	NOTCH1	hsa-miR-24-3p, hsa-miR-30b-5p, hsa-miR-30c-5p, hsa-miR-9-5p
LINC00643	EZH2	hsa-miR-124-3p, hsa-miR-137, hsa-miR-185-5p, hsa-miR-26a-5p
LINC00643	ETS1	hsa-miR-124-3p, hsa-miR-126-5p, hsa-miR-9-5p
LINC00643	CDC42	hsa-miR-137, hsa-miR-185-5p, hsa-miR-30c-5p
LINC00641	MAP2K4	hsa-miR-25-3p, hsa-miR-27a-3p, hsa-miR-92a-3p
LINC00641	ABCG2	hsa-miR-145-5p, hsa-miR-181a-5p, hsa-miR-222-3p, hsa-miR-320a
LINC00641	CCND1	hsa-let-7b-5p, hsa-let-7e-5p, hsa-let-7f-5p, hsa-miR-101-3p, hsa-miR-135a-5p, hsa-miR-138-5p, hsa-miR-1-3p, hsa-miR-145-5p, hsa-miR-15a-5p, hsa-miR-15b-5p, hsa-miR-16-5p, hsa-miR-17-5p, hsa-miR-195-5p, hsa-miR-24-3p, hsa-miR-27a-3p, hsa-miR-338-3p, hsa-miR-34a-5p, hsa-miR-34b-3p, hsa-miR-365a-3p, hsa-miR-374a-5p, hsa-miR-377-3p, hsa-miR-425-5p, hsa-miR-497-5p, hsa-miR-708-5p, hsa-miR-7-5p, hsa-mi…
LINC00641	TIMP3	hsa-miR-103a-3p, hsa-miR-17-5p, hsa-miR-221-3p, hsa-miR-222-3p
LINC00641	THRB	hsa-miR-27a-3p, hsa-miR-425-5p, hsa-miR-452-5p
LINC00641	CDK8	hsa-miR-101-3p, hsa-miR-107, hsa-miR-195-5p
LINC00641	ZEB2	hsa-miR-101-3p, hsa-miR-132-3p, hsa-miR-138-5p, hsa-miR-221-3p, hsa-miR-338-3p, hsa-miR-590-3p, hsa-miR-708-5p
[truncated: 1,238 more rows]

## Sheet: LSCC
Sponge lncRNAs	mRNAs	Shared miRNAs
ZNF518A	DICER1	hsa-let-7a-5p, hsa-let-7c-5p, hsa-let-7d-5p, hsa-miR-130a-3p, hsa-miR-130b-3p, hsa-miR-18a-5p, hsa-miR-200c-3p, hsa-miR-374a-5p
ZNF518A	SP1	hsa-miR-129-5p, hsa-miR-137, hsa-miR-200b-3p, hsa-miR-200c-3p, hsa-miR-27a-3p, hsa-miR-29b-3p, hsa-miR-33a-5p, hsa-miR-429
ZNF213-AS1	RAF1	hsa-miR-16-5p, hsa-miR-195-5p, hsa-miR-497-5p
ZFAS1	RASSF1	hsa-miR-181a-5p, hsa-miR-181b-5p, hsa-miR-373-3p
ZBED3-AS1	MECP2	hsa-miR-130a-3p, hsa-miR-155-5p, hsa-miR-19a-3p
WDFY3-AS2	FOXO3	hsa-miR-221-3p, hsa-miR-31-5p, hsa-miR-9-5p
WAC-AS1	DAZAP2	hsa-miR-106b-5p, hsa-miR-17-3p, hsa-miR-17-5p, hsa-miR-20a-5p, hsa-miR-302a-3p, hsa-miR-93-5p
UBL7-AS1	EZH2	hsa-let-7a-5p, hsa-let-7b-5p, hsa-let-7e-5p
UBL7-AS1	AURKB	hsa-let-7a-5p, hsa-let-7e-5p, hsa-let-7i-5p
TUG1	SIRT1	hsa-miR-128-3p, hsa-miR-132-3p, hsa-miR-138-5p, hsa-miR-142-5p, hsa-miR-181a-5p, hsa-miR-181b-5p, hsa-miR-181c-5p, hsa-miR-199a-5p, hsa-miR-199b-5p, hsa-miR-200c-3p, hsa-miR-216a-5p, hsa-miR-221-3p, hsa-miR-22-3p, hsa-miR-23b-3p, hsa-miR-29c-3p, hsa-miR-34a-3p, hsa-miR-34a-5p, hsa-miR-449a, hsa-miR-449b-5p, hsa-miR-543, hsa-miR-92a-3p, hsa-miR-9-5p
TUG1	ADAM10	hsa-miR-103a-3p, hsa-miR-122-5p, hsa-miR-448, hsa-miR-449a, hsa-miR-655-3p
TUG1	NCOA3	hsa-miR-137, hsa-miR-17-3p, hsa-miR-17-5p, hsa-miR-18a-5p, hsa-miR-21-5p, hsa-miR-29b-3p, hsa-miR-33a-5p, hsa-miR-98-5p
TUG1	CDH1	hsa-miR-129-5p, hsa-miR-132-3p, hsa-miR-138-5p, hsa-miR-139-5p, hsa-miR-183-5p, hsa-miR-196a-5p, hsa-miR-199a-5p, hsa-miR-200a-3p, hsa-miR-200c-3p, hsa-miR-224-5p, hsa-miR-23a-3p, hsa-miR-25-3p, hsa-miR-26a-5p, hsa-miR-26b-5p, hsa-miR-30a-5p, hsa-miR-34a-5p, hsa-miR-421, hsa-miR-526b-3p, hsa-miR-92a-3p, hsa-miR-9-3p, hsa-miR-9-5p, hsa-miR-96-5p
TUG1	YY1	hsa-miR-205-5p, hsa-miR-31-5p, hsa-miR-34a-5p, hsa-miR-34c-5p, hsa-miR-7-5p
TUG1	TGIF2	hsa-miR-148a-3p, hsa-miR-148a-5p, hsa-miR-29c-3p, hsa-miR-30c-5p, hsa-miR-34a-3p, hsa-miR-34a-5p, hsa-miR-34c-5p
TUG1	STAT3	hsa-let-7a-5p, hsa-let-7c-5p, hsa-miR-106a-5p, hsa-miR-106b-5p, hsa-miR-130b-3p, hsa-miR-148a-3p, hsa-miR-17-5p, hsa-miR-181a-5p, hsa-miR-20a-5p, hsa-miR-20b-5p, hsa-miR-21-3p, hsa-miR-21-5p, hsa-miR-223-3p, hsa-miR-23a-3p, hsa-miR-29b-1-5p, hsa-miR-29b-3p, hsa-miR-340-5p, hsa-miR-375, hsa-miR-519d-3p, hsa-miR-92a-3p
TUG1	SMAD1	hsa-miR-205-5p, hsa-miR-26a-5p, hsa-miR-26b-5p, hsa-miR-30a-5p, hsa-miR-30b-5p, hsa-miR-30c-5p, hsa-miR-30d-5p
TUG1	SETD2	hsa-miR-106b-5p, hsa-miR-186-5p, hsa-miR-199a-5p, hsa-miR-199b-5p, hsa-miR-21-5p, hsa-miR-526b-3p
TUG1	FMR1	hsa-miR-101-3p, hsa-miR-129-5p, hsa-miR-130b-3p, hsa-miR-221-3p
TUG1	APC	hsa-miR-106a-5p, hsa-miR-106b-5p, hsa-miR-129-5p, hsa-miR-135a-5p, hsa-miR-135b-5p, hsa-miR-142-3p, hsa-miR-27a-3p
TUG1	NOTCH2	hsa-miR-107, hsa-miR-181c-5p, hsa-miR-23b-3p, hsa-miR-326, hsa-miR-34a-5p, hsa-miR-9-3p, hsa-miR-9-5p
TUG1	TIAM1	hsa-miR-141-3p, hsa-miR-182-5p, hsa-miR-21-5p, hsa-miR-22-3p, hsa-miR-29c-3p, hsa-miR-31-5p
TUG1	TET2	hsa-miR-101-3p, hsa-miR-22-3p, hsa-miR-26a-5p, hsa-miR-29a-3p, hsa-miR-29b-3p, hsa-miR-29c-3p, hsa-miR-7-5p
TUG1	RAF1	hsa-miR-132-3p, hsa-miR-139-5p, hsa-miR-16-5p, hsa-miR-195-5p, hsa-miR-497-5p, hsa-miR-7-5p
TUG1	CTNND1	hsa-miR-145-5p, hsa-miR-29c-3p, hsa-miR-409-3p, hsa-miR-98-5p
TUG1	CLIP1	hsa-miR-106b-5p, hsa-miR-17-3p, hsa-miR-17-5p, hsa-miR-18a-5p, hsa-miR-20a-5p, hsa-miR-25-3p, hsa-miR-93-5p
TUG1	ADAR	hsa-miR-1-3p, hsa-miR-17-5p, hsa-miR-20a-5p, hsa-miR-432-5p
TTC28-AS1	BRCA1	hsa-miR-15a-5p, hsa-miR-182-5p, hsa-miR-20b-5p
TRHDE-AS1	HNF4A	hsa-miR-143-3p, hsa-miR-34a-5p, hsa-miR-449a
TRAF3IP2-AS1	HNF4A	hsa-miR-216a-5p, hsa-miR-34a-5p, hsa-miR-34c-5p, hsa-miR-449a
TRAF3IP2-AS1	FOXO3	hsa-miR-10b-5p, hsa-miR-182-5p, hsa-miR-23a-3p, hsa-miR-9-5p, hsa-miR-96-5p
TP73-AS1	PODXL	hsa-miR-125b-5p, hsa-miR-145-5p, hsa-miR-199b-5p
TP73-AS1	NTRK3	hsa-miR-125a-5p, hsa-miR-125b-5p, hsa-miR-148a-3p, hsa-miR-185-5p, hsa-miR-22-3p, hsa-miR-324-5p, hsa-miR-330-5p, hsa-miR-384, hsa-miR-9-5p
TOB1-AS1	FOXO1	hsa-miR-27a-3p, hsa-miR-27b-3p, hsa-miR-9-3p
TMPO-AS1	BAP1	hsa-miR-200b-3p, hsa-miR-200c-3p, hsa-miR-429
TMEM254-AS1	EGFR	hsa-miR-128-3p, hsa-miR-21-5p, hsa-miR-27a-3p, hsa-miR-27b-3p
THUMPD3-AS1	CDK8	hsa-miR-101-3p, hsa-miR-107, hsa-miR-26a-5p
SOX2-OT	PIK3CA	hsa-miR-126-5p, hsa-miR-139-5p, hsa-miR-1-3p, hsa-miR-148b-3p, hsa-miR-19a-3p
SNHG3	MYB	hsa-miR-15a-5p, hsa-miR-16-5p, hsa-miR-195-5p, hsa-miR-200a-3p, hsa-miR-424-5p, hsa-miR-503-5p
SNHG3	E2F2	hsa-let-7a-5p, hsa-let-7b-5p, hsa-miR-125b-5p, hsa-miR-24-3p, hsa-miR-98-5p
SNHG3	EZH2	hsa-let-7a-5p, hsa-let-7b-5p, hsa-let-7e-5p, hsa-miR-138-5p, hsa-miR-185-5p, hsa-miR-199a-5p, hsa-miR-200a-3p, hsa-miR-98-5p
SNHG3	CDC25A	hsa-let-7b-5p, hsa-let-7c-5p, hsa-miR-141-3p, hsa-miR-15a-5p, hsa-miR-195-5p, hsa-miR-365a-3p, hsa-miR-424-5p, hsa-miR-503-5p
SNHG17	TDG	hsa-miR-26a-5p, hsa-miR-29a-3p, hsa-miR-29b-3p, hsa-miR-29c-3p
SNHG14	BCL2	hsa-miR-125a-5p, hsa-miR-125b-5p, hsa-miR-135a-5p, hsa-miR-139-5p, hsa-miR-143-3p, hsa-miR-148a-3p, hsa-miR-15a-5p, hsa-miR-15b-5p, hsa-miR-16-5p, hsa-miR-17-5p, hsa-miR-181a-5p, hsa-miR-18a-5p, hsa-miR-193a-3p, hsa-miR-195-5p, hsa-miR-224-5p, hsa-miR-29a-3p, hsa-miR-29b-3p, hsa-miR-29c-3p, hsa-miR-30b-5p, hsa-miR-33b-5p, hsa-miR-34a-3p, hsa-miR-34a-5p, hsa-miR-365a-3p, hsa-miR-7-5p, hsa-miR-9-5p
SNHG14	ATM	hsa-miR-101-3p, hsa-miR-181a-5p, hsa-miR-18a-5p, hsa-miR-26a-5p, hsa-miR-374a-5p
SNHG14	KIT	hsa-miR-137, hsa-miR-146b-5p, hsa-miR-193b-3p, hsa-miR-19a-3p, hsa-miR-218-5p, hsa-miR-221-3p, hsa-miR-34a-5p
SNHG14	KDR	hsa-miR-15b-5p, hsa-miR-16-5p, hsa-miR-195-5p, hsa-miR-24-3p, hsa-miR-296-5p
SNHG12	IKBKB	hsa-miR-199a-5p, hsa-miR-200b-3p, hsa-miR-200c-3p, hsa-miR-218-5p, hsa-miR-451a, hsa-miR-497-5p, hsa-miR-503-5p
SNHG12	CDC42	hsa-miR-107, hsa-miR-137, hsa-miR-185-5p, hsa-miR-195-5p, hsa-miR-216a-5p, hsa-miR-224-5p
SH3BP5-AS1	PURA	hsa-miR-15a-5p, hsa-miR-15b-5p, hsa-miR-16-5p
RP5-1112D6.4	RAF1	hsa-miR-16-5p, hsa-miR-195-5p, hsa-miR-497-5p, hsa-miR-7-1-3p
RP4-773N10.4	NOTCH1	hsa-miR-24-3p, hsa-miR-27b-3p, hsa-miR-30b-5p, hsa-miR-30c-5p, hsa-miR-30d-5p, hsa-miR-30e-5p, hsa-miR-34a-5p, hsa-miR-449a
RP3-508I15.18	LEFTY1	hsa-miR-302a-3p, hsa-miR-372-3p, hsa-miR-373-3p
RP13-516M14.1	GSK3B	hsa-miR-182-5p, hsa-miR-199a-5p, hsa-miR-29a-3p, hsa-miR-29b-3p, hsa-miR-96-5p
RP13-516M14.1	SETD2	hsa-miR-186-5p, hsa-miR-199a-5p, hsa-miR-199b-5p
RP11-96D1.11	ERBB2	hsa-miR-22-3p, hsa-miR-25-3p, hsa-miR-331-3p
RP11-819C21.1	SOX4	hsa-miR-132-3p, hsa-miR-212-3p, hsa-miR-30a-5p, hsa-miR-335-5p, hsa-miR-369-3p
RP11-819C21.1	ATM	hsa-miR-101-5p, hsa-miR-106a-5p, hsa-miR-223-3p, hsa-miR-374a-5p
RP11-819C21.1	RECK	hsa-miR-16-5p, hsa-miR-221-3p, hsa-miR-222-3p, hsa-miR-374b-5p, hsa-miR-409-3p
RP11-819C21.1	MBNL2	hsa-miR-218-5p, hsa-miR-30a-5p, hsa-miR-30b-5p, hsa-miR-30e-5p
RP11-819C21.1	KIT	hsa-miR-193b-3p, hsa-miR-218-5p, hsa-miR-221-3p, hsa-miR-222-3p
RP11-819C21.1	SP1	hsa-miR-145-5p, hsa-miR-200b-3p, hsa-miR-200c-3p, hsa-miR-218-5p, hsa-miR-223-3p, hsa-miR-27a-3p, hsa-miR-335-5p, hsa-miR-429
RP11-819C21.1	RPS6KB1	hsa-miR-145-5p, hsa-miR-16-5p, hsa-miR-200c-3p, hsa-miR-218-5p
RP11-819C21.1	MBNL1	hsa-miR-30a-5p, hsa-miR-30b-5p, hsa-miR-30e-5p
RP11-819C21.1	CTNND1	hsa-miR-145-5p, hsa-miR-409-3p, hsa-miR-98-5p
RP11-819C21.1	ZEB1	hsa-miR-130b-3p, hsa-miR-200b-3p, hsa-miR-200c-3p, hsa-miR-223-3p, hsa-miR-409-3p, hsa-miR-429, hsa-miR-494-3p
RP11-802E16.3	RAF1	hsa-miR-125a-5p, hsa-miR-125b-5p, hsa-miR-16-5p, hsa-miR-195-5p, hsa-miR-497-5p
RP11-77H9.2	SETD2	hsa-miR-106b-5p, hsa-miR-199a-5p, hsa-miR-199b-5p
RP11-626G11.3	XIAP	hsa-miR-192-5p, hsa-miR-215-5p, hsa-miR-7-5p
RP11-611O2.5	DLC1	hsa-miR-200b-3p, hsa-miR-200c-3p, hsa-miR-429
RP11-611O2.5	FLT1	hsa-miR-100-5p, hsa-miR-200b-3p, hsa-miR-200c-3p, hsa-miR-24-3p
RP11-46A10.5	MEF2D	hsa-miR-103a-3p, hsa-miR-122-5p, hsa-miR-17-5p, hsa-miR-20a-5p
RP11-46A10.5	ADAR	hsa-miR-1-3p, hsa-miR-17-5p, hsa-miR-20a-5p
RP11-439E19.10	CDC42	hsa-miR-185-5p, hsa-miR-216a-5p, hsa-miR-30c-5p
RP11-395G23.3	IL11	hsa-miR-1-3p, hsa-miR-204-5p, hsa-miR-211-5p
RP11-362F19.1	STAT3	hsa-miR-124-3p, hsa-miR-125a-5p, hsa-miR-125b-5p, hsa-miR-375
RP11-359B12.2	SUZ12	hsa-miR-101-3p, hsa-miR-200b-3p, hsa-miR-200c-3p
RP11-29G8.3	TP53INP1	hsa-miR-125b-5p, hsa-miR-17-5p, hsa-miR-20a-5p, hsa-miR-93-5p
RP11-29G8.3	DICER1	hsa-miR-103a-3p, hsa-miR-107, hsa-miR-18a-5p, hsa-miR-192-5p, hsa-miR-195-5p, hsa-miR-200c-3p, hsa-miR-497-5p, hsa-miR-9-5p
RP11-29G8.3	JAK2	hsa-miR-125a-5p, hsa-miR-125b-5p, hsa-miR-135a-5p
RP11-29G8.3	PURA	hsa-miR-106b-5p, hsa-miR-15a-5p, hsa-miR-15b-5p, hsa-miR-16-5p, hsa-miR-20a-5p, hsa-miR-93-5p
RP11-29G8.3	KAT2B	hsa-miR-106b-5p, hsa-miR-17-5p, hsa-miR-93-5p
RP11-29G8.3	DLC1	hsa-miR-200b-3p, hsa-miR-200c-3p, hsa-miR-429
RP11-290F5.2	TET2	hsa-miR-29a-3p, hsa-miR-29b-3p, hsa-miR-29c-3p
RP11-290F5.2	SP1	hsa-miR-145-5p, hsa-miR-218-5p, hsa-miR-223-3p, hsa-miR-29b-3p, hsa-miR-29c-3p
RP11-284N8.3	FN1	hsa-let-7g-5p, hsa-miR-200b-3p, hsa-miR-200c-3p
RP11-284N8.3	ZEB2	hsa-miR-200b-3p, hsa-miR-200c-3p, hsa-miR-429
RP11-284N8.3	VIM	hsa-miR-200c-3p, hsa-miR-30a-5p, hsa-miR-30c-5p
RP11-284N8.3	ETS1	hsa-miR-200b-3p, hsa-miR-200c-3p, hsa-miR-23b-3p
RP11-284N8.3	DLC1	hsa-miR-200b-3p, hsa-miR-200c-3p, hsa-miR-429
RP11-284N8.3	RASSF2	hsa-miR-200b-3p, hsa-miR-200c-3p, hsa-miR-429
RP11-284N8.3	PRDM1	hsa-let-7a-5p, hsa-let-7b-5p, hsa-let-7f-5p, hsa-miR-30a-5p
RP11-284N8.3	MBNL1	hsa-miR-10b-5p, hsa-miR-30a-5p, hsa-miR-30b-5p, hsa-miR-30e-5p
RP11-263K19.4	MPL	hsa-let-7a-5p, hsa-let-7c-5p, hsa-let-7e-5p, hsa-let-7f-5p, hsa-miR-1-3p, hsa-miR-98-5p
RP11-197N18.2	RAF1	hsa-miR-125a-5p, hsa-miR-125b-5p, hsa-miR-7-5p
RP11-179B15.5	DICER1	hsa-miR-103a-3p, hsa-miR-107, hsa-miR-195-5p, hsa-miR-374a-5p, hsa-miR-497-5p
RP11-179B15.5	RECK	hsa-miR-15a-5p, hsa-miR-15b-5p, hsa-miR-16-5p, hsa-miR-374b-5p
RP11-179B15.5	RPS6KB1	hsa-miR-16-5p, hsa-miR-195-5p, hsa-miR-497-5p
RP11-179B15.5	RAF1	hsa-miR-16-5p, hsa-miR-195-5p, hsa-miR-497-5p
RP11-179B15.5	ACTB	hsa-miR-15a-5p, hsa-miR-15b-5p, hsa-miR-16-5p, hsa-miR-497-5p
RP11-175O19.4	TGIF2	hsa-miR-148a-3p, hsa-miR-148a-5p, hsa-miR-30c-5p, hsa-miR-34a-5p, hsa-miR-34c-5p
RP11-175O19.4	DICER1	hsa-let-7a-5p, hsa-let-7d-5p, hsa-miR-103a-3p, hsa-miR-107, hsa-miR-192-5p, hsa-miR-221-3p, hsa-miR-374a-5p, hsa-miR-3928-3p
RP11-175O19.4	WNK1	hsa-miR-141-5p, hsa-miR-192-5p, hsa-miR-215-5p, hsa-miR-27a-3p
RP11-175O19.4	MBNL1	hsa-miR-30a-5p, hsa-miR-30b-5p, hsa-miR-30e-5p
RP11-173P15.3	ITPR1	hsa-miR-34c-5p, hsa-miR-449a, hsa-miR-494-3p
RFPL1S	PHB	hsa-miR-26a-5p, hsa-miR-27a-3p, hsa-miR-27b-3p
PVT1	BIRC5	hsa-miR-16-5p, hsa-miR-195-5p, hsa-miR-335-5p, hsa-miR-497-5p
PSMD6-AS2	PTEN	hsa-miR-130a-3p, hsa-miR-130b-3p, hsa-miR-152-3p, hsa-miR-301a-3p, hsa-miR-301b-3p
PSMD5-AS1	RBL2	hsa-miR-106a-5p, hsa-miR-106b-5p, hsa-miR-17-5p, hsa-miR-20a-5p
PSMD5-AS1	MAPK9	hsa-miR-106a-5p, hsa-miR-106b-5p, hsa-miR-17-5p, hsa-miR-20a-5p, hsa-miR-20b-5p, hsa-miR-93-5p
PRIM2	E2F3	hsa-miR-106b-5p, hsa-miR-17-5p, hsa-miR-20a-5p
PRIM2	E2F1	hsa-miR-106a-5p, hsa-miR-106b-5p, hsa-miR-17-5p, hsa-miR-20a-5p, hsa-miR-519d-3p, hsa-miR-93-5p
PKI55	KIT	hsa-miR-137, hsa-miR-19a-3p, hsa-miR-218-5p
PITPNA-AS1	GPS1	hsa-let-7c-5p, hsa-let-7f-5p, hsa-let-7i-5p
PITPNA-AS1	AURKB	hsa-let-7a-5p, hsa-let-7e-5p, hsa-let-7i-5p
PCBP1-AS1	DNMT3A	hsa-miR-143-3p, hsa-miR-29a-3p, hsa-miR-29b-3p, hsa-miR-29c-3p
PCBP1-AS1	TGIF2	hsa-miR-148a-5p, hsa-miR-29c-3p, hsa-miR-34c-5p
PCBP1-AS1	TET1	hsa-miR-29a-3p, hsa-miR-29b-3p, hsa-miR-30a-5p
PART1	BIRC5	hsa-miR-16-5p, hsa-miR-195-5p, hsa-miR-34a-5p
OIP5-AS1	PHLPP1	hsa-miR-141-3p, hsa-miR-15a-5p, hsa-miR-17-5p, hsa-miR-18a-5p, hsa-miR-19a-3p, hsa-miR-200b-3p, hsa-miR-224-5p, hsa-miR-375, hsa-miR-92a-3p
NUTM2A-AS1	FOXO1	hsa-miR-186-5p, hsa-miR-196a-5p, hsa-miR-200c-3p, hsa-miR-222-3p, hsa-miR-27a-3p, hsa-miR-27b-3p, hsa-miR-486-5p, hsa-miR-9-3p, hsa-miR-9-5p
NUTM2A-AS1	GATA4	hsa-miR-1-3p, hsa-miR-200b-3p, hsa-miR-200c-3p
NR2F2-AS1	LATS2	hsa-miR-372-3p, hsa-miR-373-3p, hsa-miR-93-5p
NR2F2-AS1	TGFBR2	hsa-miR-302d-3p, hsa-miR-372-3p, hsa-miR-373-3p, hsa-miR-93-5p
NNT-AS1	E2F1	hsa-let-7a-5p, hsa-miR-106a-5p, hsa-miR-181b-5p, hsa-miR-21-5p, hsa-miR-342-3p, hsa-miR-9-3p
NKAPP1	DAZAP2	hsa-miR-106b-5p, hsa-miR-17-5p, hsa-miR-20a-5p, hsa-miR-93-5p
NEAT1	MAFB	hsa-miR-130a-3p, hsa-miR-135b-5p, hsa-miR-148a-3p, hsa-miR-152-3p, hsa-miR-155-5p, hsa-miR-199a-5p, hsa-miR-223-3p, hsa-miR-24-3p, hsa-miR-425-5p
NEAT1	RPS6KB1	hsa-miR-122-5p, hsa-miR-145-5p, hsa-miR-16-5p, hsa-miR-195-5p, hsa-miR-200c-3p, hsa-miR-218-5p, hsa-miR-382-5p, hsa-miR-497-5p
NBPF1	SMAD5	hsa-miR-135a-5p, hsa-miR-135b-5p, hsa-miR-155-5p, hsa-miR-27a-3p
MIR22HG	TCEAL1	hsa-miR-106b-5p, hsa-miR-17-5p, hsa-miR-20a-5p, hsa-miR-22-3p, hsa-miR-25-3p, hsa-miR-370-3p
MIR22HG	FAS	hsa-miR-106a-5p, hsa-miR-196b-5p, hsa-miR-23a-3p, hsa-miR-320a
MIR181A1HG	VIM	hsa-miR-129-5p, hsa-miR-26a-5p, hsa-miR-320a
MIR181A1HG	PTEN	hsa-miR-103a-3p, hsa-miR-107, hsa-miR-21-5p, hsa-miR-26a-5p, hsa-miR-320a
MIR17HG	MYB	hsa-miR-103a-3p, hsa-miR-106a-5p, hsa-miR-107, hsa-miR-150-5p, hsa-miR-155-5p, hsa-miR-16-5p, hsa-miR-200a-3p, hsa-miR-200c-3p, hsa-miR-34a-5p
MIR17HG	WEE1	hsa-miR-106b-5p, hsa-miR-155-5p, hsa-miR-16-5p, hsa-miR-17-5p, hsa-miR-20a-5p, hsa-miR-221-3p, hsa-miR-372-3p
MIR17HG	ARID4B	hsa-miR-106a-5p, hsa-miR-19b-3p, hsa-miR-20b-5p, hsa-miR-92a-3p
MEG3	RUNX1	hsa-miR-106a-5p, hsa-miR-17-5p, hsa-miR-181a-5p, hsa-miR-18a-5p, hsa-miR-20a-5p, hsa-miR-27b-3p, hsa-miR-9-5p
MEG3	CTGF	hsa-miR-124-3p, hsa-miR-143-3p, hsa-miR-145-5p, hsa-miR-18a-5p, hsa-miR-18b-5p, hsa-miR-26a-5p, hsa-miR-26b-5p, hsa-miR-30c-5p, hsa-miR-483-3p
MEG3	COL1A2	hsa-let-7g-5p, hsa-miR-26b-5p, hsa-miR-29a-3p, hsa-miR-29c-3p
MEG3	COL1A1	hsa-miR-143-3p, hsa-miR-185-5p, hsa-miR-29b-1-5p, hsa-miR-29b-3p, hsa-miR-29c-3p
MEG3	TIMP3	hsa-miR-103a-3p, hsa-miR-17-3p, hsa-miR-17-5p, hsa-miR-181b-5p, hsa-miR-20a-5p
MEG3	PDGFRB	hsa-miR-24-3p, hsa-miR-29a-3p, hsa-miR-29b-3p, hsa-miR-29c-3p, hsa-miR-30b-5p, hsa-miR-449b-5p, hsa-miR-9-5p
MCM3AP-AS1	HMGA1	hsa-let-7a-5p, hsa-let-7b-5p, hsa-miR-15a-5p, hsa-miR-16-5p, hsa-miR-195-5p, hsa-miR-26a-5p
MAPKAPK5-AS1	TDG	hsa-miR-29a-3p, hsa-miR-29b-3p, hsa-miR-29c-3p
MALAT1	STAT3	hsa-let-7a-5p, hsa-let-7c-5p, hsa-miR-106a-5p, hsa-miR-106b-5p, hsa-miR-124-3p, hsa-miR-124-5p, hsa-miR-125a-5p, hsa-miR-125b-5p, hsa-miR-130b-3p, hsa-miR-148a-3p, hsa-miR-17-5p, hsa-miR-181a-5p, hsa-miR-20a-5p, hsa-miR-20b-5p, hsa-miR-21-3p, hsa-miR-21-5p, hsa-miR-223-3p, hsa-miR-23a-3p, hsa-miR-29b-1-5p, hsa-miR-29b-3p, hsa-miR-340-5p, hsa-miR-375, hsa-miR-519d-3p, hsa-miR-520c-3p, hsa-miR-544a…
MALAT1	NANOG	hsa-miR-128-3p, hsa-miR-134-5p, hsa-miR-145-5p, hsa-miR-150-5p, hsa-miR-181a-3p, hsa-miR-302a-3p, hsa-miR-34a-5p, hsa-miR-34b-3p, hsa-miR-34c-5p
MALAT1	ITPR1	hsa-miR-204-5p, hsa-miR-211-5p, hsa-miR-34b-3p, hsa-miR-34c-5p, hsa-miR-424-5p, hsa-miR-448, hsa-miR-449a, hsa-miR-494-3p
MALAT1	NFIA	hsa-miR-107, hsa-miR-181b-5p, hsa-miR-21-5p, hsa-miR-223-3p, hsa-miR-29a-3p, hsa-miR-302b-3p, hsa-miR-382-5p, hsa-miR-424-5p
MALAT1	JAK2	hsa-miR-101-3p, hsa-miR-125a-5p, hsa-miR-125b-5p, hsa-miR-135a-5p, hsa-miR-204-5p, hsa-miR-216a-5p, hsa-miR-375
MALAT1	TIMP3	hsa-miR-103a-3p, hsa-miR-17-3p, hsa-miR-17-5p, hsa-miR-181b-5p, hsa-miR-20a-5p, hsa-miR-21-5p, hsa-miR-221-3p, hsa-miR-222-3p
MALAT1	MBNL2	hsa-miR-10b-5p, hsa-miR-218-5p, hsa-miR-302d-3p, hsa-miR-30a-5p, hsa-miR-30b-5p, hsa-miR-30e-5p, hsa-miR-372-3p
MALAT1	ETS1	hsa-miR-124-3p, hsa-miR-125b-5p, hsa-miR-126-5p, hsa-miR-1-3p, hsa-miR-144-3p, hsa-miR-145-5p, hsa-miR-155-5p, hsa-miR-193b-3p, hsa-miR-199a-5p, hsa-miR-200b-3p, hsa-miR-200c-3p, hsa-miR-208a-3p, hsa-miR-221-3p, hsa-miR-222-3p, hsa-miR-23b-3p, hsa-miR-31-5p, hsa-miR-324-5p, hsa-miR-499a-5p, hsa-miR-506-3p, hsa-miR-9-5p
MALAT1	WNK1	hsa-miR-141-5p, hsa-miR-192-5p, hsa-miR-199a-5p, hsa-miR-215-5p, hsa-miR-24-1-5p, hsa-miR-27a-3p, hsa-miR-506-3p
MALAT1	RAF1	hsa-miR-125a-5p, hsa-miR-125b-5p, hsa-miR-132-3p, hsa-miR-139-5p, hsa-miR-16-5p, hsa-miR-195-5p, hsa-miR-497-5p, hsa-miR-7-1-3p, hsa-miR-7-5p
MALAT1	MCL1	hsa-miR-101-3p, hsa-miR-106a-5p, hsa-miR-125a-5p, hsa-miR-125b-5p, hsa-miR-133b, hsa-miR-139-5p, hsa-miR-148b-5p, hsa-miR-181a-5p, hsa-miR-181b-5p, hsa-miR-193a-3p, hsa-miR-193b-3p, hsa-miR-20a-5p, hsa-miR-26a-5p, hsa-miR-29a-3p, hsa-miR-29b-3p, hsa-miR-29c-3p, hsa-miR-302b-3p, hsa-miR-30c-5p, hsa-miR-320a, hsa-miR-512-5p, hsa-miR-518a-5p, hsa-miR-582-5p, hsa-miR-876-3p
MALAT1	PTEN	hsa-miR-103a-3p, hsa-miR-106a-5p, hsa-miR-106b-3p, hsa-miR-106b-5p, hsa-miR-107, hsa-miR-10a-5p, hsa-miR-10b-5p, hsa-miR-128-3p, hsa-miR-130a-3p, hsa-miR-130a-5p, hsa-miR-130b-3p, hsa-miR-141-3p, hsa-miR-142-5p, hsa-miR-144-3p, hsa-miR-152-3p, hsa-miR-155-5p, hsa-miR-17-3p, hsa-miR-17-5p, hsa-miR-181a-5p, hsa-miR-181b-5p, hsa-miR-181c-5p, hsa-miR-182-5p, hsa-miR-18a-5p, hsa-miR-190b, hsa-miR-193a…
MAGI2-AS3	CXCL12	hsa-miR-126-5p, hsa-miR-137, hsa-miR-23a-3p, hsa-miR-27b-3p, hsa-miR-31-5p, hsa-miR-454-3p
MAGI2-AS3	HOXA5	hsa-miR-130a-3p, hsa-miR-196a-5p, hsa-miR-19a-3p, hsa-miR-26a-5p
MAGI2-AS3	MAP4K4	hsa-let-7a-5p, hsa-miR-31-5p, hsa-miR-520e
MAGI2-AS3	TGFBR1	hsa-let-7b-5p, hsa-let-7g-5p, hsa-miR-128-3p, hsa-miR-140-5p, hsa-miR-142-3p, hsa-miR-181a-5p, hsa-miR-204-5p, hsa-miR-20a-5p, hsa-miR-27b-3p
MAGI2-AS3	ZBTB4	hsa-miR-130b-3p, hsa-miR-17-5p, hsa-miR-19a-3p, hsa-miR-93-5p
MAGI2-AS3	ITGB1	hsa-miR-124-3p, hsa-miR-130b-3p, hsa-miR-143-3p, hsa-miR-183-5p, hsa-miR-29b-3p, hsa-miR-9-3p
MAGI2-AS3	IGF1	hsa-let-7i-5p, hsa-miR-128-3p, hsa-miR-129-5p, hsa-miR-130b-3p, hsa-miR-26a-5p, hsa-miR-27a-3p, hsa-miR-28-5p
MAGI2-AS3	FN1	hsa-let-7g-5p, hsa-miR-124-3p, hsa-miR-132-3p, hsa-miR-26a-5p, hsa-miR-29b-3p
MAGI2-AS3	BMPR2	hsa-miR-135a-5p, hsa-miR-17-5p, hsa-miR-19a-3p, hsa-miR-19b-3p, hsa-miR-20a-5p, hsa-miR-302c-3p
MAGI2-AS3	PDGFRA	hsa-let-7b-5p, hsa-miR-130a-3p, hsa-miR-130b-3p, hsa-miR-140-5p, hsa-miR-29b-3p, hsa-miR-34c-5p
MAGI2-AS3	MMP2	hsa-miR-124-3p, hsa-miR-130b-3p, hsa-miR-139-5p, hsa-miR-143-3p, hsa-miR-17-5p, hsa-miR-29b-3p, hsa-miR-708-5p, hsa-miR-9-3p
MAGI2-AS3	LATS2	hsa-miR-107, hsa-miR-31-5p, hsa-miR-372-3p, hsa-miR-373-3p, hsa-miR-93-5p
MAGI2-AS3	COL1A1	hsa-miR-129-5p, hsa-miR-143-3p, hsa-miR-185-5p, hsa-miR-29b-3p
MAGI2-AS3	VIM	hsa-miR-124-3p, hsa-miR-129-5p, hsa-miR-132-3p, hsa-miR-196a-5p, hsa-miR-204-5p, hsa-miR-26a-5p, hsa-miR-29b-3p, hsa-miR-30c-5p, hsa-miR-9-5p
MAGI2-AS3	PDGFRB	hsa-miR-29b-3p, hsa-miR-30b-5p, hsa-miR-34c-5p, hsa-miR-9-5p
MAGI2-AS3	MAP3K12	hsa-miR-130a-3p, hsa-miR-17-5p, hsa-miR-20a-5p
MAGI2-AS3	ETS1	hsa-miR-124-3p, hsa-miR-126-5p, hsa-miR-23b-3p, hsa-miR-31-5p, hsa-miR-499a-5p, hsa-miR-9-5p
LOXL1-AS1	BDNF	hsa-miR-182-5p, hsa-miR-204-5p, hsa-miR-96-5p
LINC01314	WEE1	hsa-miR-15a-5p, hsa-miR-15b-5p, hsa-miR-16-5p, hsa-miR-195-5p, hsa-miR-497-5p
LINC01128	MTOR	hsa-miR-100-5p, hsa-miR-101-3p, hsa-miR-99a-5p, hsa-miR-99b-5p
LINC01089	EZH2	hsa-let-7a-5p, hsa-let-7b-5p, hsa-let-7e-5p, hsa-miR-124-3p
LINC01004	RAF1	hsa-miR-125a-5p, hsa-miR-125b-5p, hsa-miR-16-5p, hsa-miR-195-5p, hsa-miR-497-5p
LINC00969	EZH2	hsa-miR-137, hsa-miR-199a-5p, hsa-miR-200b-3p, hsa-miR-217, hsa-miR-320c, hsa-miR-429
LINC00958	TP63	hsa-miR-130b-3p, hsa-miR-21-5p, hsa-miR-301b-3p
LINC00958	FSCN1	hsa-miR-145-5p, hsa-miR-200b-3p, hsa-miR-24-3p, hsa-miR-326, hsa-miR-429
LINC00894	MECP2	hsa-miR-122-5p, hsa-miR-130a-3p, hsa-miR-19a-3p, hsa-miR-30a-3p, hsa-miR-340-5p
LINC00641	SMAD7	hsa-miR-15b-5p, hsa-miR-185-5p, hsa-miR-195-5p, hsa-miR-25-3p, hsa-miR-497-5p, hsa-miR-93-5p
LINC00641	KDR	hsa-miR-15b-5p, hsa-miR-16-5p, hsa-miR-195-5p, hsa-miR-24-3p
LINC00641	KAT2B	hsa-miR-17-5p, hsa-miR-181a-5p, hsa-miR-25-3p, hsa-miR-92a-3p, hsa-miR-93-5p
LINC00324	TCEAL1	hsa-miR-22-3p, hsa-miR-224-5p, hsa-miR-663a
LINC00265	FASN	hsa-miR-195-5p, hsa-miR-30c-5p, hsa-miR-424-5p
KDM4A-AS1	MDM2	hsa-miR-17-5p, hsa-miR-18b-5p, hsa-miR-20a-5p
KB-1732A1.1	LEFTY2	hsa-miR-302a-3p, hsa-miR-302d-3p, hsa-miR-373-3p
JPX	XIAP	hsa-miR-186-5p, hsa-miR-24-3p, hsa-miR-7-5p
HOXC-AS1	MYB	hsa-miR-15a-5p, hsa-miR-16-5p, hsa-miR-195-5p, hsa-miR-424-5p, hsa-miR-503-5p
HNRNPU-AS1	NFIA	hsa-miR-107, hsa-miR-29a-3p, hsa-miR-382-5p, hsa-miR-424-5p
HNRNPU-AS1	JAK2	hsa-miR-101-3p, hsa-miR-135a-5p, hsa-miR-204-5p, hsa-miR-375
HNRNPU-AS1	CDC42	hsa-miR-107, hsa-miR-195-5p, hsa-miR-204-5p, hsa-miR-224-5p, hsa-miR-29a-3p, hsa-miR-29b-3p, hsa-miR-29c-3p, hsa-miR-30c-5p
HNRNPU-AS1	TRAF5	hsa-miR-23b-3p, hsa-miR-26b-5p, hsa-miR-29a-3p
HNRNPU-AS1	MTDH	hsa-miR-136-5p, hsa-miR-145-5p, hsa-miR-153-3p, hsa-miR-26a-5p, hsa-miR-320a, hsa-miR-375, hsa-miR-542-3p, hsa-miR-630
HNRNPU-AS1	MCL1	hsa-miR-101-3p, hsa-miR-139-5p, hsa-miR-153-3p, hsa-miR-26a-5p, hsa-miR-29a-3p, hsa-miR-29b-3p, hsa-miR-29c-3p, hsa-miR-30c-5p, hsa-miR-320a
H19	IGF2	hsa-let-7a-5p, hsa-miR-100-5p, hsa-miR-125b-5p, hsa-miR-150-5p, hsa-miR-615-5p
GS1-124K5.11	PURA	hsa-miR-15a-5p, hsa-miR-15b-5p, hsa-miR-16-5p
GS1-124K5.11	RAF1	hsa-miR-16-5p, hsa-miR-195-5p, hsa-miR-497-5p
GAS5	TDG	hsa-miR-26a-5p, hsa-miR-29a-3p, hsa-miR-29b-3p, hsa-miR-29c-3p
GABPB1-AS1	ELAVL1	hsa-miR-23c, hsa-miR-519a-3p, hsa-miR-519b-3p, hsa-miR-519c-3p, hsa-miR-9-5p
GABPB1-AS1	RPS6KB1	hsa-miR-145-5p, hsa-miR-382-5p, hsa-miR-497-5p
FTX	ZBTB4	hsa-miR-17-5p, hsa-miR-19a-3p, hsa-miR-93-5p
FTX	TP53INP1	hsa-miR-125b-5p, hsa-miR-142-5p, hsa-miR-17-5p, hsa-miR-19a-3p, hsa-miR-93-5p
FTX	IGF1	hsa-let-7e-5p, hsa-let-7i-5p, hsa-miR-128-3p, hsa-miR-190b, hsa-miR-199a-3p, hsa-miR-29a-3p, hsa-miR-98-5p
FTX	TET2	hsa-miR-125b-5p, hsa-miR-22-3p, hsa-miR-29a-3p, hsa-miR-29b-3p, hsa-miR-29c-3p, hsa-miR-7-5p
FTX	PRDM1	hsa-let-7a-5p, hsa-let-7b-5p, hsa-let-7f-5p, hsa-miR-125b-5p, hsa-miR-222-3p, hsa-miR-30a-5p, hsa-miR-320c, hsa-miR-9-5p
FTX	ZEB1	hsa-miR-142-5p, hsa-miR-144-3p, hsa-miR-150-5p, hsa-miR-183-5p, hsa-miR-205-5p, hsa-miR-494-3p, hsa-miR-652-3p, hsa-miR-655-3p
FGD5-AS1	MYLIP	hsa-miR-106a-5p, hsa-miR-19b-3p, hsa-miR-20b-5p, hsa-miR-92a-3p
FGD5-AS1	VHL	hsa-miR-101-3p, hsa-miR-155-5p, hsa-miR-21-5p, hsa-miR-23b-3p, hsa-miR-424-5p
FGD5-AS1	CCNT2	hsa-miR-142-3p, hsa-miR-16-5p, hsa-miR-29a-3p
FGD5-AS1	RAF1	hsa-miR-132-3p, hsa-miR-139-5p, hsa-miR-16-5p, hsa-miR-195-5p, hsa-miR-497-5p, hsa-miR-7-5p
FGD5-AS1	RAB5A	hsa-miR-101-3p, hsa-miR-130a-3p, hsa-miR-451a
FGD5-AS1	MLH1	hsa-miR-148b-3p, hsa-miR-155-5p, hsa-miR-31-5p
FAM83H-AS1	FASN	hsa-miR-195-5p, hsa-miR-30c-5p, hsa-miR-424-5p
FAM83H-AS1	PHLPP1	hsa-miR-15a-5p, hsa-miR-224-5p, hsa-miR-331-3p
FAM66C	PURA	hsa-miR-15a-5p, hsa-miR-15b-5p, hsa-miR-16-5p
ERVK3-1	CCNE2	hsa-miR-30b-5p, hsa-miR-34a-5p, hsa-miR-34c-5p, hsa-miR-449a, hsa-miR-449b-5p
DLX6-AS1	ABCC1	hsa-miR-145-5p, hsa-miR-7-5p, hsa-miR-9-5p
DLX6-AS1	BDNF	hsa-miR-124-3p, hsa-miR-132-3p, hsa-miR-1-3p, hsa-miR-15a-5p, hsa-miR-16-5p, hsa-miR-22-3p
DLX6-AS1	SOX5	hsa-miR-132-3p, hsa-miR-15a-5p, hsa-miR-16-5p
DLX6-AS1	PIK3CA	hsa-let-7b-5p, hsa-miR-124-3p, hsa-miR-126-5p, hsa-miR-1-3p, hsa-miR-148b-3p
DLX6-AS1	BECN1	hsa-miR-221-3p, hsa-miR-30b-5p, hsa-miR-30c-5p, hsa-miR-9-5p
DLX6-AS1	BRCA1	hsa-miR-15a-5p, hsa-miR-16-5p, hsa-miR-20b-5p, hsa-miR-24-3p
DLX6-AS1	YWHAZ	hsa-miR-1-3p, hsa-miR-27a-3p, hsa-miR-320a
DLEU2	SUZ12	hsa-miR-101-3p, hsa-miR-128-3p, hsa-miR-200b-3p, hsa-miR-200c-3p
DLEU2	CDX2	hsa-miR-181a-5p, hsa-miR-204-5p, hsa-miR-424-5p
DLEU2	XIAP	hsa-miR-181a-5p, hsa-miR-186-5p, hsa-miR-200b-3p, hsa-miR-200c-3p, hsa-miR-429, hsa-miR-7-5p
DLEU2	ERBB2IP	hsa-miR-200b-3p, hsa-miR-200c-3p, hsa-miR-429
DANCR	STMN1	hsa-miR-221-3p, hsa-miR-223-3p, hsa-miR-34a-5p, hsa-miR-9-5p
CTD-3185P2.1	PRKAB1	hsa-miR-101-3p, hsa-miR-122-5p, hsa-miR-148b-3p
CTD-2587M2.1	FBXW7	hsa-miR-25-3p, hsa-miR-32-5p, hsa-miR-363-3p, hsa-miR-92a-3p
CTD-2015H6.3	FOXO3	hsa-miR-10b-5p, hsa-miR-217, hsa-miR-93-5p
CTB-89H12.4	NFIA	hsa-miR-107, hsa-miR-181b-5p, hsa-miR-21-5p, hsa-miR-223-3p, hsa-miR-29a-3p, hsa-miR-302b-3p, hsa-miR-424-5p
CTB-89H12.4	PURA	hsa-miR-106b-5p, hsa-miR-15a-5p, hsa-miR-15b-5p, hsa-miR-16-5p, hsa-miR-20a-5p, hsa-miR-93-5p
CHKB-AS1	BIRC5	hsa-miR-16-5p, hsa-miR-195-5p, hsa-miR-497-5p
CERS6-AS1	PHLPP1	hsa-miR-15a-5p, hsa-miR-17-5p, hsa-miR-190a-5p
CERS6-AS1	RB1CC1	hsa-miR-133b, hsa-miR-20a-5p, hsa-miR-20b-5p
CERS6-AS1	CHEK1	hsa-miR-15a-5p, hsa-miR-15b-5p, hsa-miR-16-5p, hsa-miR-195-5p, hsa-miR-424-5p, hsa-miR-497-5p, hsa-miR-503-5p
CERS6-AS1	BRCA1	hsa-miR-15a-5p, hsa-miR-16-5p, hsa-miR-20b-5p
CERS6-AS1	CDC25A	hsa-miR-15a-5p, hsa-miR-195-5p, hsa-miR-424-5p, hsa-miR-497-5p, hsa-miR-503-5p
CCAT1	PIK3CA	hsa-let-7b-5p, hsa-miR-148b-3p, hsa-miR-19a-3p
CASP8AP2	MYB	hsa-miR-150-5p, hsa-miR-155-5p, hsa-miR-34a-5p
CASP8AP2	CDK2	hsa-miR-302a-3p, hsa-miR-302b-3p, hsa-miR-302d-3p, hsa-miR-372-3p
C1RL-AS1	DICER1	hsa-miR-103a-3p, hsa-miR-107, hsa-miR-195-5p, hsa-miR-497-5p
C1RL-AS1	IFNG	hsa-miR-15a-5p, hsa-miR-15b-5p, hsa-miR-16-5p
BAZ2B	NLK	hsa-miR-181a-5p, hsa-miR-181b-5p, hsa-miR-181c-5p
ATP6V0E2-AS1	HOXA10	hsa-miR-192-5p, hsa-miR-204-5p, hsa-miR-320a, hsa-miR-494-3p
ATP6V0E2-AS1	FOXO3	hsa-miR-182-5p, hsa-miR-223-3p, hsa-miR-9-5p, hsa-miR-96-5p
AP000662.4	FOXO3	hsa-miR-29a-3p, hsa-miR-592, hsa-miR-9-5p
AC084809.2	CSF1	hsa-miR-130a-3p, hsa-miR-130b-3p, hsa-miR-148b-3p, hsa-miR-152-3p
AC083843.1	PER1	hsa-miR-29a-3p, hsa-miR-29b-3p, hsa-miR-29c-3p
AC074117.10	WNT3A	hsa-miR-15a-5p, hsa-miR-16-5p, hsa-miR-26a-5p
AC058791.1	ITGB1	hsa-miR-29a-3p, hsa-miR-29b-3p, hsa-miR-29c-3p
AC058791.1	TNFAIP3	hsa-miR-29a-3p, hsa-miR-29b-3p, hsa-miR-29c-3p
AC058791.1	CDC42	hsa-miR-29a-3p, hsa-miR-29b-3p, hsa-miR-29c-3p
AC058791.1	MCL1	hsa-miR-29a-3p, hsa-miR-29b-3p, hsa-miR-29c-3p
AC058791.1	PTEN	hsa-miR-29a-3p, hsa-miR-29b-3p, hsa-miR-29c-3p
AC009120.6	RPS6KB1	hsa-miR-145-5p, hsa-miR-16-5p, hsa-miR-195-5p, hsa-miR-497-5p
AC005562.1	SMAD4	hsa-miR-125a-5p, hsa-miR-125b-5p, hsa-miR-182-5p, hsa-miR-183-5p, hsa-miR-27a-3p
AC005562.1	PPM1D	hsa-miR-15b-5p, hsa-miR-16-5p, hsa-miR-29a-3p
AC005562.1	BRCA1	hsa-miR-15a-5p, hsa-miR-16-5p, hsa-miR-182-5p
AC005562.1	RPS6KB1	hsa-miR-16-5p, hsa-miR-195-5p, hsa-miR-497-5p
AC005154.6	PURA	hsa-miR-15a-5p, hsa-miR-15b-5p, hsa-miR-16-5p, hsa-miR-93-5p
AC005154.6	JAK1	hsa-miR-107, hsa-miR-17-5p, hsa-miR-30c-5p
AC004593.3	MPL	hsa-let-7a-5p, hsa-let-7d-5p, hsa-let-7e-5p, hsa-let-7f-5p
AC004540.5	NRP1	hsa-miR-148a-3p, hsa-miR-152-3p, hsa-miR-338-3p
AC004540.4	FOXO1	hsa-miR-135a-5p, hsa-miR-135b-5p, hsa-miR-21-5p
AATK-AS1	TERT	hsa-miR-138-5p, hsa-miR-3064-5p, hsa-miR-532-5p

## Sheet: OvCa
Sponge lncRNAs	mRNAs	Shared miRNAs
ZNF518A	CRKL	hsa-miR-200b-3p, hsa-miR-200c-3p, hsa-miR-429
ZNF518A	MAGI2	hsa-miR-134-5p, hsa-miR-487a-3p, hsa-miR-655-3p
ZNF518A	AKT2	hsa-let-7b-5p, hsa-let-7g-5p, hsa-miR-137, hsa-miR-29b-3p, hsa-miR-302b-3p
ZNF518A	SMAD3	hsa-miR-140-5p, hsa-miR-142-5p, hsa-miR-155-5p, hsa-miR-18a-5p, hsa-miR-200a-3p
ZNF518A	WNT5A	hsa-miR-154-3p, hsa-miR-200a-3p, hsa-miR-374a-5p
ZNF518A	TGFB2	hsa-miR-137, hsa-miR-141-3p, hsa-miR-142-5p, hsa-miR-200a-3p, hsa-miR-29b-3p
ZNF518A	NCAM1	hsa-miR-122-5p, hsa-miR-200c-3p, hsa-miR-30a-5p
ZNF518A	CCND2	hsa-let-7a-5p, hsa-let-7b-5p, hsa-miR-155-5p, hsa-miR-29b-3p, hsa-miR-302b-3p, hsa-miR-302d-3p, hsa-miR-30c-5p, hsa-miR-98-5p
ZNF518A	NFE2L2	hsa-miR-142-5p, hsa-miR-153-3p, hsa-miR-27a-3p
ZNF518A	LIN28B	hsa-let-7a-5p, hsa-let-7b-5p, hsa-miR-125b-5p
ZNF518A	PAK1	hsa-let-7a-5p, hsa-miR-30c-5p, hsa-miR-98-5p
ZNF518A	ARID3A	hsa-let-7e-5p, hsa-miR-125a-5p, hsa-miR-125b-5p
ZNF518A	YOD1	hsa-miR-155-5p, hsa-miR-18a-5p, hsa-miR-19a-3p, hsa-miR-19b-3p
ZNF518A	WDR37	hsa-miR-141-3p, hsa-miR-200a-3p, hsa-miR-200b-3p, hsa-miR-200c-3p, hsa-miR-429
ZNF518A	VAC14	hsa-miR-141-3p, hsa-miR-200a-3p, hsa-miR-200b-3p, hsa-miR-200c-3p, hsa-miR-429
ZNF518A	SMAD2	hsa-let-7g-5p, hsa-miR-125a-5p, hsa-miR-155-5p, hsa-miR-18a-5p, hsa-miR-18b-5p, hsa-miR-200a-3p, hsa-miR-200b-3p, hsa-miR-27a-3p, hsa-miR-27b-3p
ZNF518A	NCOA3	hsa-miR-137, hsa-miR-18a-5p, hsa-miR-19b-3p, hsa-miR-29b-3p, hsa-miR-33a-5p, hsa-miR-98-5p
ZNF518A	MXD1	hsa-miR-125b-5p, hsa-miR-19a-3p, hsa-miR-19b-3p
ZNF518A	MBNL1	hsa-miR-30a-5p, hsa-miR-30b-5p, hsa-miR-30e-5p
ZNF518A	MAP4K4	hsa-let-7a-5p, hsa-miR-141-3p, hsa-miR-30d-5p
ZNF518A	KRAS	hsa-let-7a-5p, hsa-let-7f-5p, hsa-let-7g-5p, hsa-miR-134-5p, hsa-miR-155-5p, hsa-miR-200c-3p, hsa-miR-27a-3p, hsa-miR-452-5p
ZNF518A	ITGB1	hsa-miR-130b-3p, hsa-miR-134-5p, hsa-miR-155-5p, hsa-miR-29b-3p
ZNF518A	HIF1A	hsa-miR-142-5p, hsa-miR-155-5p, hsa-miR-186-5p, hsa-miR-18a-5p, hsa-miR-18b-5p, hsa-miR-27a-3p, hsa-miR-33a-5p, hsa-miR-429
ZNF518A	HDAC4	hsa-miR-125a-5p, hsa-miR-140-5p, hsa-miR-29b-3p, hsa-miR-302b-3p, hsa-miR-30c-5p, hsa-miR-381-3p
ZNF518A	ERBB2IP	hsa-miR-141-3p, hsa-miR-200a-3p, hsa-miR-200b-3p, hsa-miR-200c-3p, hsa-miR-429
ZNF518A	E2F3	hsa-miR-125a-5p, hsa-miR-125b-5p, hsa-miR-141-3p, hsa-miR-200b-3p, hsa-miR-200c-3p
ZNF518A	DICER1	hsa-let-7a-5p, hsa-let-7c-5p, hsa-let-7d-5p, hsa-miR-130a-3p, hsa-miR-130b-3p, hsa-miR-18a-5p, hsa-miR-200c-3p, hsa-miR-374a-5p
ZNF518A	CDK6	hsa-let-7a-5p, hsa-let-7b-5p, hsa-miR-129-2-3p, hsa-miR-129-5p, hsa-miR-137, hsa-miR-196a-5p, hsa-miR-200a-3p, hsa-miR-29b-3p
ZNF518A	BCL9	hsa-miR-30a-5p, hsa-miR-30b-5p, hsa-miR-30c-5p, hsa-miR-30d-5p
ZNF518A	BACH1	hsa-miR-155-5p, hsa-miR-18a-5p, hsa-miR-196a-5p, hsa-miR-19a-3p, hsa-miR-19b-3p
ZNF518A	APC	hsa-miR-125b-5p, hsa-miR-129-5p, hsa-miR-155-5p, hsa-miR-27a-3p
ZNF518A	ADAM10	hsa-miR-122-5p, hsa-miR-448, hsa-miR-655-3p
ZNF518A	TCF7L1	hsa-miR-141-3p, hsa-miR-200a-3p, hsa-miR-200b-3p, hsa-miR-200c-3p, hsa-miR-429
ZNF518A	SUZ12	hsa-miR-19a-3p, hsa-miR-200b-3p, hsa-miR-200c-3p
ZNF518A	SP1	hsa-miR-129-5p, hsa-miR-137, hsa-miR-200b-3p, hsa-miR-200c-3p, hsa-miR-27a-3p, hsa-miR-29b-3p, hsa-miR-33a-5p, hsa-miR-429
ZNF518A	RIN2	hsa-miR-141-3p, hsa-miR-200a-3p, hsa-miR-200b-3p, hsa-miR-200c-3p, hsa-miR-429
ZNF518A	PHLPP1	hsa-miR-141-3p, hsa-miR-18a-5p, hsa-miR-19a-3p, hsa-miR-200b-3p
ZNF518A	MBNL2	hsa-miR-302d-3p, hsa-miR-30a-5p, hsa-miR-30b-5p, hsa-miR-30e-5p
ZNF518A	MAPK14	hsa-miR-125a-5p, hsa-miR-125b-5p, hsa-miR-141-3p, hsa-miR-155-5p, hsa-miR-200a-3p, hsa-miR-27a-3p
ZNF518A	KLHL20	hsa-miR-141-3p, hsa-miR-200a-3p, hsa-miR-200b-3p, hsa-miR-200c-3p, hsa-miR-429
ZNF518A	ELMO2	hsa-miR-141-3p, hsa-miR-200a-3p, hsa-miR-200b-3p, hsa-miR-200c-3p, hsa-miR-429
ZNF518A	DNMT3A	hsa-miR-194-5p, hsa-miR-200b-3p, hsa-miR-200c-3p, hsa-miR-29b-3p
ZNF518A	CREB1	hsa-miR-1224-5p, hsa-miR-122-5p, hsa-miR-200b-3p, hsa-miR-27a-3p, hsa-miR-27b-3p, hsa-miR-33b-5p
ZNF518A	CLIP1	hsa-miR-155-5p, hsa-miR-18a-5p, hsa-miR-19a-3p, hsa-miR-19b-3p
ZNF518A	ATXN1	hsa-miR-130a-3p, hsa-miR-19a-3p, hsa-miR-19b-3p
ZNF518A	ACVR2B	hsa-miR-141-3p, hsa-miR-194-5p, hsa-miR-200c-3p
ZMIZ1-AS1	VEGFA	hsa-miR-15a-5p, hsa-miR-15b-5p, hsa-miR-16-5p, hsa-miR-195-5p
ZFAS1	CCND1	hsa-let-7a-3p, hsa-let-7e-5p, hsa-miR-101-3p, hsa-miR-106a-5p, hsa-miR-106b-5p, hsa-miR-152-3p, hsa-miR-15a-5p, hsa-miR-15b-5p, hsa-miR-16-5p, hsa-miR-193a-3p, hsa-miR-193b-3p, hsa-miR-195-5p, hsa-miR-196a-5p, hsa-miR-20a-5p, hsa-miR-29a-3p, hsa-miR-29b-3p, hsa-miR-34a-5p, hsa-miR-34c-5p, hsa-miR-377-3p, hsa-miR-424-5p, hsa-miR-425-5p, hsa-miR-449a, hsa-miR-497-5p, hsa-miR-520a-3p, hsa-miR-708-5p…
ZFAS1	CHUK	hsa-miR-15a-5p, hsa-miR-15b-5p, hsa-miR-16-5p, hsa-miR-195-5p
ZFAS1	YAP1	hsa-miR-15a-5p, hsa-miR-16-5p, hsa-miR-195-5p, hsa-miR-199a-3p, hsa-miR-375
ZFAS1	CCND2	hsa-let-7a-3p, hsa-miR-106b-5p, hsa-miR-15a-5p, hsa-miR-16-5p, hsa-miR-20a-5p, hsa-miR-26a-5p, hsa-miR-29a-3p, hsa-miR-29b-3p, hsa-miR-29c-3p
ZFAS1	CDK8	hsa-miR-101-3p, hsa-miR-107, hsa-miR-195-5p, hsa-miR-26a-5p
ZFAS1	PLAG1	hsa-miR-107, hsa-miR-144-3p, hsa-miR-181a-5p, hsa-miR-181b-5p, hsa-miR-26a-5p, hsa-miR-375, hsa-miR-424-5p
ZFAS1	TGIF2	hsa-miR-148a-3p, hsa-miR-29c-3p, hsa-miR-34a-5p, hsa-miR-34c-5p, hsa-miR-541-3p
ZFAS1	CDK6	hsa-miR-103a-3p, hsa-miR-107, hsa-miR-129-2-3p, hsa-miR-16-5p, hsa-miR-185-5p, hsa-miR-195-5p, hsa-miR-196a-5p, hsa-miR-214-3p, hsa-miR-26a-5p, hsa-miR-26b-5p, hsa-miR-29a-3p, hsa-miR-29b-3p, hsa-miR-29c-3p, hsa-miR-30a-3p, hsa-miR-320a, hsa-miR-34a-5p, hsa-miR-34b-5p, hsa-miR-34c-5p, hsa-miR-377-3p, hsa-miR-424-5p, hsa-miR-449a, hsa-miR-449b-5p, hsa-miR-491-5p, hsa-miR-497-5p
ZFAS1	ATM	hsa-miR-101-3p, hsa-miR-101-5p, hsa-miR-106a-5p, hsa-miR-181a-5p, hsa-miR-181b-5p, hsa-miR-26a-5p, hsa-miR-421
ZFAS1	TDG	hsa-miR-26a-5p, hsa-miR-29a-3p, hsa-miR-29b-3p, hsa-miR-29c-3p
ZEB1-AS1	SNAI1	hsa-miR-128-3p, hsa-miR-153-3p, hsa-miR-217, hsa-miR-486-5p
ZEB1-AS1	WDR37	hsa-miR-200b-3p, hsa-miR-200c-3p, hsa-miR-429
ZEB1-AS1	IGF1R	hsa-miR-140-5p, hsa-miR-217, hsa-miR-376c-3p, hsa-miR-448, hsa-miR-486-5p, hsa-miR-7-5p
ZEB1-AS1	TCF7L1	hsa-miR-200b-3p, hsa-miR-200c-3p, hsa-miR-429
ZEB1-AS1	FOXO3	hsa-miR-217, hsa-miR-221-3p, hsa-miR-29a-3p
ZBED3-AS1	HMGCR	hsa-miR-29a-3p, hsa-miR-29b-3p, hsa-miR-29c-3p
ZBED3-AS1	TGFB2	hsa-miR-137, hsa-miR-21-5p, hsa-miR-29b-3p
ZBED3-AS1	NFIA	hsa-miR-21-5p, hsa-miR-29a-3p, hsa-miR-382-5p
ZBED3-AS1	ESR1	hsa-miR-130a-3p, hsa-miR-19a-3p, hsa-miR-221-3p, hsa-miR-29a-3p, hsa-miR-29b-3p
ZBED3-AS1	YOD1	hsa-miR-155-5p, hsa-miR-19a-3p, hsa-miR-21-5p
ZBED3-AS1	TET2	hsa-miR-125b-5p, hsa-miR-29a-3p, hsa-miR-29b-3p, hsa-miR-29c-3p
ZBED3-AS1	PDCD4	hsa-miR-155-5p, hsa-miR-21-5p, hsa-miR-330-3p
ZBED3-AS1	CDK6	hsa-miR-137, hsa-miR-29a-3p, hsa-miR-29b-3p, hsa-miR-29c-3p, hsa-miR-491-5p
ZBED3-AS1	CDC42	hsa-miR-137, hsa-miR-29a-3p, hsa-miR-29b-3p, hsa-miR-29c-3p, hsa-miR-330-3p
ZBED3-AS1	APAF1	hsa-miR-155-5p, hsa-miR-21-5p, hsa-miR-221-3p
ZBED3-AS1	LRP6	hsa-miR-21-5p, hsa-miR-29b-3p, hsa-miR-29c-3p
ZBED3-AS1	DNMT3A	hsa-miR-29a-3p, hsa-miR-29b-3p, hsa-miR-29c-3p
YTHDF3	TP53INP1	hsa-miR-125b-5p, hsa-miR-17-5p, hsa-miR-182-5p, hsa-miR-20a-5p, hsa-miR-93-5p, hsa-miR-96-5p
YTHDF3	MTSS1	hsa-miR-135a-5p, hsa-miR-182-5p, hsa-miR-96-5p
YTHDF3	MAPK9	hsa-miR-106a-5p, hsa-miR-106b-5p, hsa-miR-17-5p, hsa-miR-20a-5p, hsa-miR-20b-5p, hsa-miR-93-5p
YTHDF3	NOTCH1	hsa-miR-23b-3p, hsa-miR-24-3p, hsa-miR-30a-5p, hsa-miR-30d-5p, hsa-miR-30e-5p, hsa-miR-9-5p
YTHDF3	HSPA5	hsa-miR-30a-5p, hsa-miR-30d-5p, hsa-miR-495-3p
YTHDF3	CCNA2	hsa-let-7b-5p, hsa-miR-22-3p, hsa-miR-24-3p
YTHDF3	MCL1	hsa-miR-106a-5p, hsa-miR-125a-5p, hsa-miR-125b-5p, hsa-miR-153-3p, hsa-miR-20a-5p, hsa-miR-302b-3p, hsa-miR-582-5p
YTHDF3	IL10	hsa-let-7c-5p, hsa-miR-106a-5p, hsa-miR-194-5p
YTHDF3	HIF1A	hsa-miR-106a-5p, hsa-miR-106b-5p, hsa-miR-17-5p, hsa-miR-20a-5p, hsa-miR-20b-5p, hsa-miR-22-3p, hsa-miR-23b-3p
YTHDF3	CLIC4	hsa-miR-106b-5p, hsa-miR-17-5p, hsa-miR-20a-5p, hsa-miR-93-5p
YTHDF3	APC	hsa-miR-106a-5p, hsa-miR-106b-5p, hsa-miR-125b-5p, hsa-miR-135a-5p, hsa-miR-135b-5p
YTHDF3	NRAS	hsa-let-7a-5p, hsa-let-7b-5p, hsa-let-7c-5p, hsa-miR-20a-5p
YTHDF3	LIN28A	hsa-let-7a-5p, hsa-let-7b-5p, hsa-miR-125a-5p, hsa-miR-125b-5p
YTHDF3	LATS2	hsa-miR-372-3p, hsa-miR-373-3p, hsa-miR-93-5p
YTHDF3	CASP3	hsa-let-7a-5p, hsa-let-7c-5p, hsa-let-7g-5p, hsa-miR-30d-5p, hsa-miR-30e-5p, hsa-miR-582-5p
XIST	CXCL2	hsa-miR-141-3p, hsa-miR-192-5p, hsa-miR-200a-3p, hsa-miR-217, hsa-miR-223-3p, hsa-miR-27b-3p, hsa-miR-532-5p
XIST	AKT1	hsa-let-7b-5p, hsa-miR-100-5p, hsa-miR-10b-5p, hsa-miR-122-5p, hsa-miR-125a-5p, hsa-miR-125b-5p, hsa-miR-126-3p, hsa-miR-126-5p, hsa-miR-133b, hsa-miR-138-5p, hsa-miR-143-3p, hsa-miR-17-5p, hsa-miR-182-5p, hsa-miR-185-3p, hsa-miR-192-5p, hsa-miR-196b-5p, hsa-miR-199a-3p, hsa-miR-19a-3p, hsa-miR-205-5p, hsa-miR-206, hsa-miR-22-3p, hsa-miR-29b-3p, hsa-miR-302a-3p, hsa-miR-302b-3p, hsa-miR-302d-3p, …
XIST	ZEB1	hsa-miR-101-3p, hsa-miR-10b-5p, hsa-miR-1236-3p, hsa-miR-130b-3p, hsa-miR-141-3p, hsa-miR-142-5p, hsa-miR-144-3p, hsa-miR-150-5p, hsa-miR-183-5p, hsa-miR-200a-3p, hsa-miR-200b-3p, hsa-miR-200c-3p, hsa-miR-205-5p, hsa-miR-223-3p, hsa-miR-23b-3p, hsa-miR-33b-5p, hsa-miR-409-3p, hsa-miR-429, hsa-miR-455-3p, hsa-miR-484, hsa-miR-494-3p, hsa-miR-590-3p, hsa-miR-652-3p, hsa-miR-655-3p, hsa-miR-96-5p
XIST	RUNX2	hsa-miR-103a-3p, hsa-miR-135a-5p, hsa-miR-155-5p, hsa-miR-195-5p, hsa-miR-204-5p, hsa-miR-205-5p, hsa-miR-218-5p, hsa-miR-221-5p, hsa-miR-222-3p, hsa-miR-23b-3p, hsa-miR-29b-3p, hsa-miR-30a-3p, hsa-miR-30a-5p, hsa-miR-30b-5p, hsa-miR-30c-5p, hsa-miR-30d-5p, hsa-miR-320a, hsa-miR-335-5p, hsa-miR-34c-5p, hsa-miR-376c-3p, hsa-miR-433-3p, hsa-miR-497-5p, hsa-miR-628-3p
XIST	NR4A2	hsa-miR-129-5p, hsa-miR-19a-3p, hsa-miR-206, hsa-miR-217, hsa-miR-302d-3p, hsa-miR-34a-5p, hsa-miR-372-3p
XIST	MYC	hsa-let-7a-5p, hsa-let-7c-5p, hsa-let-7g-5p, hsa-miR-122-5p, hsa-miR-125a-3p, hsa-miR-126-5p, hsa-miR-129-2-3p, hsa-miR-130a-3p, hsa-miR-135a-5p, hsa-miR-135b-5p, hsa-miR-145-5p, hsa-miR-155-5p, hsa-miR-17-5p, hsa-miR-185-5p, hsa-miR-20a-5p, hsa-miR-212-3p, hsa-miR-21-5p, hsa-miR-24-3p, hsa-miR-26a-5p, hsa-miR-26b-5p, hsa-miR-29a-3p, hsa-miR-29b-3p, hsa-miR-320a, hsa-miR-320b, hsa-miR-335-5p, hsa…
XIST	TET2	hsa-miR-101-3p, hsa-miR-125b-5p, hsa-miR-22-3p, hsa-miR-26a-5p, hsa-miR-29a-3p, hsa-miR-29b-3p, hsa-miR-29c-3p, hsa-miR-7-5p
XIST	STAT3	hsa-let-7a-5p, hsa-let-7c-5p, hsa-miR-106a-5p, hsa-miR-106b-5p, hsa-miR-124-3p, hsa-miR-125a-5p, hsa-miR-125b-5p, hsa-miR-130b-3p, hsa-miR-148a-3p, hsa-miR-17-5p, hsa-miR-181a-5p, hsa-miR-20a-5p, hsa-miR-20b-5p, hsa-miR-21-3p, hsa-miR-21-5p, hsa-miR-223-3p, hsa-miR-23a-3p, hsa-miR-29b-3p, hsa-miR-337-3p, hsa-miR-340-5p, hsa-miR-375, hsa-miR-519d-3p, hsa-miR-520c-3p, hsa-miR-544a, hsa-miR-874-3p, …
XIST	RPS6KB1	hsa-miR-122-5p, hsa-miR-145-5p, hsa-miR-16-5p, hsa-miR-195-5p, hsa-miR-200c-3p, hsa-miR-218-5p, hsa-miR-382-5p, hsa-miR-497-5p
XIST	PIM1	hsa-miR-101-3p, hsa-miR-124-3p, hsa-miR-1-3p, hsa-miR-16-5p, hsa-miR-192-5p, hsa-miR-210-3p, hsa-miR-33a-5p, hsa-miR-33b-5p, hsa-miR-542-3p
XIST	MCL1	hsa-miR-101-3p, hsa-miR-106a-5p, hsa-miR-125a-5p, hsa-miR-125b-5p, hsa-miR-133b, hsa-miR-139-5p, hsa-miR-148b-5p, hsa-miR-153-3p, hsa-miR-181a-5p, hsa-miR-181b-5p, hsa-miR-193a-3p, hsa-miR-193b-3p, hsa-miR-20a-5p, hsa-miR-26a-5p, hsa-miR-29a-3p, hsa-miR-29b-3p, hsa-miR-29c-3p, hsa-miR-302b-3p, hsa-miR-30c-5p, hsa-miR-320a, hsa-miR-339-3p, hsa-miR-512-5p, hsa-miR-582-5p, hsa-miR-876-3p, hsa-miR-89…
XIST	JAK2	hsa-miR-101-3p, hsa-miR-125a-5p, hsa-miR-125b-5p, hsa-miR-135a-5p, hsa-miR-204-5p, hsa-miR-216a-5p, hsa-miR-375
XIST	HDAC4	hsa-miR-125a-5p, hsa-miR-1-3p, hsa-miR-140-5p, hsa-miR-22-3p, hsa-miR-29b-3p, hsa-miR-302b-3p, hsa-miR-30c-5p, hsa-miR-381-3p, hsa-miR-9-5p
XIST	ETS1	hsa-miR-124-3p, hsa-miR-125b-5p, hsa-miR-126-3p, hsa-miR-126-5p, hsa-miR-1-3p, hsa-miR-144-3p, hsa-miR-145-5p, hsa-miR-155-5p, hsa-miR-193b-3p, hsa-miR-199a-5p, hsa-miR-200b-3p, hsa-miR-200c-3p, hsa-miR-208a-3p, hsa-miR-221-3p, hsa-miR-222-3p, hsa-miR-23b-3p, hsa-miR-31-5p, hsa-miR-324-5p, hsa-miR-499a-5p, hsa-miR-506-3p, hsa-miR-9-5p
WWC3-AS1	STAT3	hsa-miR-106a-5p, hsa-miR-106b-5p, hsa-miR-17-5p, hsa-miR-20a-5p, hsa-miR-20b-5p
WDFY3-AS2	FOXO3	hsa-miR-221-3p, hsa-miR-31-5p, hsa-miR-9-5p
WAC-AS1	YAP1	hsa-miR-15a-5p, hsa-miR-16-5p, hsa-miR-195-5p, hsa-miR-27a-3p, hsa-miR-506-3p
WAC-AS1	TP53	hsa-miR-150-5p, hsa-miR-15a-5p, hsa-miR-16-5p, hsa-miR-17-5p, hsa-miR-214-5p, hsa-miR-24-3p, hsa-miR-27a-3p, hsa-miR-377-3p
WAC-AS1	XIAP	hsa-miR-192-5p, hsa-miR-215-5p, hsa-miR-23a-3p, hsa-miR-24-3p
WAC-AS1	BACE1	hsa-miR-107, hsa-miR-15a-5p, hsa-miR-16-5p, hsa-miR-339-5p
WAC-AS1	NFIA	hsa-miR-107, hsa-miR-302b-3p, hsa-miR-424-5p
WAC-AS1	YOD1	hsa-miR-106b-5p, hsa-miR-17-3p, hsa-miR-17-5p, hsa-miR-20a-5p, hsa-miR-93-5p
WAC-AS1	WNK1	hsa-miR-192-5p, hsa-miR-215-5p, hsa-miR-27a-3p, hsa-miR-506-3p
WAC-AS1	STAT3	hsa-miR-106a-5p, hsa-miR-106b-5p, hsa-miR-17-5p, hsa-miR-20a-5p, hsa-miR-20b-5p, hsa-miR-23a-3p, hsa-miR-519d-3p, hsa-miR-520c-3p, hsa-miR-874-3p
WAC-AS1	MCL1	hsa-miR-106a-5p, hsa-miR-139-5p, hsa-miR-193a-3p, hsa-miR-193b-3p, hsa-miR-20a-5p, hsa-miR-302b-3p
WAC-AS1	DICER1	hsa-miR-103a-3p, hsa-miR-107, hsa-miR-192-5p, hsa-miR-195-5p, hsa-miR-497-5p
WAC-AS1	CBL	hsa-miR-150-5p, hsa-miR-188-3p, hsa-miR-216a-5p
WAC-AS1	ADAR	hsa-miR-1-3p, hsa-miR-17-5p, hsa-miR-20a-5p
WAC-AS1	ZBTB4	hsa-miR-106b-5p, hsa-miR-17-5p, hsa-miR-93-5p
WAC-AS1	SP1	hsa-miR-1-3p, hsa-miR-145-5p, hsa-miR-150-5p, hsa-miR-218-5p, hsa-miR-24-3p, hsa-miR-27a-3p, hsa-miR-33a-5p
WAC-AS1	PRKCE	hsa-miR-107, hsa-miR-139-5p, hsa-miR-1-3p
WAC-AS1	PHLPP2	hsa-miR-20a-5p, hsa-miR-27a-3p, hsa-miR-372-3p, hsa-miR-93-5p
WAC-AS1	MEF2D	hsa-miR-103a-3p, hsa-miR-17-5p, hsa-miR-20a-5p
WAC-AS1	APP	hsa-miR-106a-5p, hsa-miR-106b-5p, hsa-miR-15a-5p, hsa-miR-16-5p, hsa-miR-17-5p, hsa-miR-20a-5p, hsa-miR-520c-3p
VSTM2A-OT1	E2F2	hsa-let-7a-5p, hsa-let-7b-5p, hsa-miR-24-3p, hsa-miR-26a-5p
VSTM2A-OT1	MPL	hsa-let-7a-5p, hsa-let-7d-5p, hsa-let-7e-5p, hsa-let-7f-5p
VSTM2A-OT1	CCNE1	hsa-miR-126-5p, hsa-miR-137, hsa-miR-26a-5p, hsa-miR-7-5p
USP3-AS1	FGB	hsa-miR-29a-3p, hsa-miR-29b-3p, hsa-miR-29c-3p
USP3-AS1	FBXW7	hsa-miR-25-3p, hsa-miR-32-5p, hsa-miR-363-3p, hsa-miR-367-3p, hsa-miR-92a-3p
UBXN8	TNFRSF10B	hsa-let-7a-5p, hsa-let-7b-5p, hsa-let-7c-5p, hsa-let-7d-5p, hsa-let-7e-5p, hsa-let-7g-5p
UBL7-AS1	E2F2	hsa-let-7a-5p, hsa-let-7b-5p, hsa-miR-125b-5p
UBL7-AS1	AURKB	hsa-let-7a-5p, hsa-let-7e-5p, hsa-let-7i-5p
TUG1	PPARGC1A	hsa-miR-130a-3p, hsa-miR-130b-3p, hsa-miR-23a-3p, hsa-miR-485-3p, hsa-miR-485-5p
TUG1	CRKL	hsa-miR-15a-5p, hsa-miR-200c-3p, hsa-miR-320a, hsa-miR-335-5p, hsa-miR-429
TUG1	CDH1	hsa-miR-129-5p, hsa-miR-132-3p, hsa-miR-138-5p, hsa-miR-139-5p, hsa-miR-183-5p, hsa-miR-196a-5p, hsa-miR-199a-5p, hsa-miR-200a-3p, hsa-miR-200c-3p, hsa-miR-224-5p, hsa-miR-23a-3p, hsa-miR-25-3p, hsa-miR-26a-5p, hsa-miR-26b-5p, hsa-miR-30a-5p, hsa-miR-34a-5p, hsa-miR-421, hsa-miR-526b-3p, hsa-miR-92a-3p, hsa-miR-9-3p, hsa-miR-9-5p, hsa-miR-96-5p
TUG1	BAP1	hsa-miR-141-3p, hsa-miR-200a-3p, hsa-miR-200c-3p, hsa-miR-31-5p, hsa-miR-429
TUG1	YAP1	hsa-miR-138-5p, hsa-miR-141-3p, hsa-miR-15a-5p, hsa-miR-16-5p, hsa-miR-195-5p, hsa-miR-199a-3p, hsa-miR-200a-3p, hsa-miR-27a-3p, hsa-miR-375
TUG1	SMAD1	hsa-miR-205-5p, hsa-miR-26a-5p, hsa-miR-26b-5p, hsa-miR-30a-5p, hsa-miR-30b-5p, hsa-miR-30c-5p, hsa-miR-30d-5p
TUG1	PTK2	hsa-miR-135a-5p, hsa-miR-138-5p, hsa-miR-193a-3p, hsa-miR-379-5p, hsa-miR-543, hsa-miR-7-5p
TUG1	SRF	hsa-miR-101-3p, hsa-miR-122-5p, hsa-miR-1-3p, hsa-miR-200a-3p, hsa-miR-483-3p, hsa-miR-9-5p
TUG1	NFE2L2	hsa-miR-142-5p, hsa-miR-144-3p, hsa-miR-153-3p, hsa-miR-27a-3p
TUG1	MTSS1	hsa-miR-135a-5p, hsa-miR-15b-5p, hsa-miR-182-5p, hsa-miR-96-5p
TUG1	LIMK1	hsa-miR-106a-5p, hsa-miR-143-3p, hsa-miR-17-5p, hsa-miR-20a-5p, hsa-miR-20b-5p
TUG1	FMR1	hsa-miR-101-3p, hsa-miR-129-5p, hsa-miR-130b-3p, hsa-miR-221-3p
TUG1	SRC	hsa-miR-205-5p, hsa-miR-23b-3p, hsa-miR-31-5p, hsa-miR-33a-5p, hsa-miR-33b-5p, hsa-miR-34a-5p
TUG1	PAK1	hsa-let-7a-5p, hsa-miR-145-5p, hsa-miR-221-3p, hsa-miR-30c-5p, hsa-miR-7-5p, hsa-miR-98-5p
TUG1	NOTCH1	hsa-miR-101-3p, hsa-miR-129-5p, hsa-miR-139-5p, hsa-miR-144-3p, hsa-miR-181a-5p, hsa-miR-200c-3p, hsa-miR-23b-3p, hsa-miR-24-3p, hsa-miR-27b-3p, hsa-miR-30a-3p, hsa-miR-30a-5p, hsa-miR-30b-5p, hsa-miR-30c-5p, hsa-miR-30d-5p, hsa-miR-30e-5p, hsa-miR-326, hsa-miR-34a-5p, hsa-miR-34c-5p, hsa-miR-363-3p, hsa-miR-410-3p, hsa-miR-449a, hsa-miR-9-5p
TUG1	NFIA	hsa-miR-107, hsa-miR-181b-5p, hsa-miR-21-5p, hsa-miR-223-3p, hsa-miR-29a-3p, hsa-miR-382-5p, hsa-miR-424-5p
TUG1	HSPA5	hsa-miR-181a-5p, hsa-miR-199a-5p, hsa-miR-30a-5p, hsa-miR-30d-5p, hsa-miR-384, hsa-miR-495-3p
TUG1	GRN	hsa-miR-107, hsa-miR-29b-3p, hsa-miR-588, hsa-miR-659-3p, hsa-miR-9-5p
TUG1	FASN	hsa-miR-1-3p, hsa-miR-195-5p, hsa-miR-30c-5p, hsa-miR-424-5p, hsa-miR-532-5p
TUG1	COL4A1	hsa-miR-140-3p, hsa-miR-17-5p, hsa-miR-20a-5p, hsa-miR-21-5p, hsa-miR-29a-3p, hsa-miR-29b-3p, hsa-miR-29c-3p
TUG1	COL3A1	hsa-let-7b-5p, hsa-let-7d-5p, hsa-miR-143-3p, hsa-miR-29a-3p, hsa-miR-29b-1-5p, hsa-miR-29b-3p, hsa-miR-29c-3p
TUG1	COL1A2	hsa-let-7g-5p, hsa-miR-26b-5p, hsa-miR-29a-3p, hsa-miR-29c-3p
TUG1	COL1A1	hsa-miR-129-5p, hsa-miR-143-3p, hsa-miR-29b-1-5p, hsa-miR-29b-3p, hsa-miR-29c-3p
TUG1	YY1	hsa-miR-205-5p, hsa-miR-31-5p, hsa-miR-34a-5p, hsa-miR-34c-5p, hsa-miR-7-5p
TUG1	YOD1	hsa-miR-106b-5p, hsa-miR-17-3p, hsa-miR-17-5p, hsa-miR-18a-5p, hsa-miR-20a-5p, hsa-miR-21-5p, hsa-miR-25-3p, hsa-miR-93-5p
TUG1	VEGFA	hsa-miR-101-3p, hsa-miR-106a-5p, hsa-miR-106b-5p, hsa-miR-107, hsa-miR-125a-3p, hsa-miR-1-3p, hsa-miR-140-5p, hsa-miR-141-3p, hsa-miR-145-5p, hsa-miR-15a-5p, hsa-miR-15b-5p, hsa-miR-16-1-3p, hsa-miR-16-5p, hsa-miR-17-5p, hsa-miR-181a-5p, hsa-miR-186-5p, hsa-miR-195-5p, hsa-miR-199a-3p, hsa-miR-199a-5p, hsa-miR-200c-3p, hsa-miR-205-5p, hsa-miR-206, hsa-miR-20a-5p, hsa-miR-20b-5p, hsa-miR-21-5p, hs…
TUG1	TIMP2	hsa-miR-106a-5p, hsa-miR-17-5p, hsa-miR-200c-3p, hsa-miR-20a-5p, hsa-miR-301a-3p, hsa-miR-429, hsa-miR-519d-3p
TUG1	TIAM1	hsa-miR-141-3p, hsa-miR-182-5p, hsa-miR-21-5p, hsa-miR-22-3p, hsa-miR-29c-3p, hsa-miR-31-5p
TUG1	TGIF2	hsa-miR-148a-3p, hsa-miR-148a-5p, hsa-miR-29c-3p, hsa-miR-30c-5p, hsa-miR-34a-3p, hsa-miR-34a-5p, hsa-miR-34c-5p
TUG1	TET2	hsa-miR-101-3p, hsa-miR-22-3p, hsa-miR-26a-5p, hsa-miR-29a-3p, hsa-miR-29b-3p, hsa-miR-29c-3p, hsa-miR-7-5p
TUG1	STAT3	hsa-let-7a-5p, hsa-let-7c-5p, hsa-miR-106a-5p, hsa-miR-106b-5p, hsa-miR-130b-3p, hsa-miR-148a-3p, hsa-miR-17-5p, hsa-miR-181a-5p, hsa-miR-20a-5p, hsa-miR-20b-5p, hsa-miR-21-3p, hsa-miR-21-5p, hsa-miR-223-3p, hsa-miR-23a-3p, hsa-miR-29b-1-5p, hsa-miR-29b-3p, hsa-miR-340-5p, hsa-miR-375, hsa-miR-519d-3p, hsa-miR-92a-3p
TUG1	SOX5	hsa-miR-132-3p, hsa-miR-15a-5p, hsa-miR-16-5p, hsa-miR-194-5p, hsa-miR-21-5p
TUG1	SMURF1	hsa-miR-140-5p, hsa-miR-15b-5p, hsa-miR-17-5p, hsa-miR-497-5p
TUG1	SMAD4	hsa-miR-130a-3p, hsa-miR-130b-3p, hsa-miR-144-3p, hsa-miR-17-5p, hsa-miR-182-5p, hsa-miR-183-5p, hsa-miR-18a-5p, hsa-miR-199a-5p, hsa-miR-205-5p, hsa-miR-20a-5p, hsa-miR-224-5p, hsa-miR-26a-5p, hsa-miR-26b-5p, hsa-miR-27a-3p, hsa-miR-301a-3p, hsa-miR-31-5p, hsa-miR-34a-3p, hsa-miR-34a-5p, hsa-miR-421, hsa-miR-454-3p, hsa-miR-483-3p
TUG1	SIRT1	hsa-miR-128-3p, hsa-miR-132-3p, hsa-miR-138-5p, hsa-miR-142-5p, hsa-miR-181a-5p, hsa-miR-181b-5p, hsa-miR-181c-5p, hsa-miR-199a-5p, hsa-miR-199b-5p, hsa-miR-200c-3p, hsa-miR-216a-5p, hsa-miR-221-3p, hsa-miR-22-3p, hsa-miR-23b-3p, hsa-miR-29c-3p, hsa-miR-34a-3p, hsa-miR-34a-5p, hsa-miR-449a, hsa-miR-449b-5p, hsa-miR-543, hsa-miR-92a-3p, hsa-miR-9-5p
TUG1	SETD2	hsa-miR-106b-5p, hsa-miR-186-5p, hsa-miR-199a-5p, hsa-miR-199b-5p, hsa-miR-21-5p, hsa-miR-526b-3p
TUG1	RPS6KB1	hsa-miR-122-5p, hsa-miR-145-5p, hsa-miR-16-5p, hsa-miR-195-5p, hsa-miR-200c-3p, hsa-miR-382-5p, hsa-miR-497-5p
TUG1	RBL2	hsa-miR-106a-5p, hsa-miR-106b-5p, hsa-miR-17-5p, hsa-miR-20a-5p
TUG1	RASA1	hsa-miR-132-3p, hsa-miR-21-5p, hsa-miR-31-5p, hsa-miR-335-5p
TUG1	RAF1	hsa-miR-132-3p, hsa-miR-139-5p, hsa-miR-16-5p, hsa-miR-195-5p, hsa-miR-497-5p, hsa-miR-7-5p
TUG1	NOTCH2	hsa-miR-107, hsa-miR-181c-5p, hsa-miR-23b-3p, hsa-miR-326, hsa-miR-34a-5p, hsa-miR-9-3p, hsa-miR-9-5p
TUG1	NLK	hsa-miR-101-3p, hsa-miR-181a-5p, hsa-miR-181b-5p, hsa-miR-181c-5p, hsa-miR-199b-5p, hsa-miR-409-3p, hsa-miR-92b-3p
TUG1	NCOA3	hsa-miR-137, hsa-miR-17-3p, hsa-miR-17-5p, hsa-miR-18a-5p, hsa-miR-21-5p, hsa-miR-29b-3p, hsa-miR-33a-5p, hsa-miR-98-5p
TUG1	MECP2	hsa-miR-122-5p, hsa-miR-130a-3p, hsa-miR-181c-5p, hsa-miR-212-3p, hsa-miR-30a-3p, hsa-miR-340-5p, hsa-miR-432-5p
TUG1	KRAS	hsa-let-7a-5p, hsa-let-7f-5p, hsa-let-7g-5p, hsa-miR-1-3p, hsa-miR-143-3p, hsa-miR-152-3p, hsa-miR-16-5p, hsa-miR-181a-5p, hsa-miR-181c-5p, hsa-miR-193a-3p, hsa-miR-193b-3p, hsa-miR-199a-5p, hsa-miR-200c-3p, hsa-miR-206, hsa-miR-216b-5p, hsa-miR-224-5p, hsa-miR-27a-3p, hsa-miR-340-5p, hsa-miR-365a-3p, hsa-miR-384, hsa-miR-433-3p, hsa-miR-452-5p, hsa-miR-543, hsa-miR-613, hsa-miR-96-5p
TUG1	KIT	hsa-miR-137, hsa-miR-193b-3p, hsa-miR-199b-5p, hsa-miR-20a-5p, hsa-miR-221-3p, hsa-miR-222-3p, hsa-miR-34a-5p
TUG1	KDM5B	hsa-miR-137, hsa-miR-194-5p, hsa-miR-29a-3p, hsa-miR-424-5p
TUG1	ITGB1	hsa-miR-130b-3p, hsa-miR-143-3p, hsa-miR-183-5p, hsa-miR-192-5p, hsa-miR-29a-3p, hsa-miR-29b-3p, hsa-miR-29c-3p, hsa-miR-9-3p
TUG1	IKBKB	hsa-miR-132-3p, hsa-miR-148a-3p, hsa-miR-199a-5p, hsa-miR-200c-3p, hsa-miR-28-5p, hsa-miR-497-5p, hsa-miR-503-5p
TUG1	IGF1R	hsa-let-7a-5p, hsa-let-7b-5p, hsa-let-7c-5p, hsa-let-7e-5p, hsa-miR-122-5p, hsa-miR-125b-2-3p, hsa-miR-138-5p, hsa-miR-139-5p, hsa-miR-140-5p, hsa-miR-141-3p, hsa-miR-143-3p, hsa-miR-145-5p, hsa-miR-148a-3p, hsa-miR-152-3p, hsa-miR-16-5p, hsa-miR-181b-5p, hsa-miR-194-5p, hsa-miR-21-5p, hsa-miR-223-3p, hsa-miR-26b-5p, hsa-miR-320a, hsa-miR-335-5p, hsa-miR-375, hsa-miR-376a-3p, hsa-miR-378a-3p, hsa…
TUG1	HIF1A	hsa-miR-106a-5p, hsa-miR-106b-5p, hsa-miR-107, hsa-miR-138-5p, hsa-miR-142-5p, hsa-miR-17-5p, hsa-miR-186-5p, hsa-miR-18a-5p, hsa-miR-18b-5p, hsa-miR-199a-5p, hsa-miR-199b-5p, hsa-miR-20a-5p, hsa-miR-20b-5p, hsa-miR-210-3p, hsa-miR-22-3p, hsa-miR-23b-3p, hsa-miR-27a-3p, hsa-miR-338-3p, hsa-miR-33a-5p, hsa-miR-382-5p, hsa-miR-424-5p, hsa-miR-429, hsa-miR-433-3p
TUG1	HDAC4	hsa-miR-1-3p, hsa-miR-140-5p, hsa-miR-22-3p, hsa-miR-29b-3p, hsa-miR-30c-5p, hsa-miR-381-3p, hsa-miR-9-5p
TUG1	FLT1	hsa-miR-142-3p, hsa-miR-181a-5p, hsa-miR-199a-3p, hsa-miR-200c-3p, hsa-miR-222-3p, hsa-miR-24-3p
TUG1	E2F1	hsa-let-7a-5p, hsa-miR-106a-5p, hsa-miR-106b-5p, hsa-miR-122-5p, hsa-miR-135a-5p, hsa-miR-17-5p, hsa-miR-181b-5p, hsa-miR-182-5p, hsa-miR-193a-3p, hsa-miR-205-5p, hsa-miR-20a-5p, hsa-miR-21-5p, hsa-miR-223-3p, hsa-miR-330-3p, hsa-miR-342-3p, hsa-miR-34a-5p, hsa-miR-519d-3p, hsa-miR-93-5p, hsa-miR-9-3p, hsa-miR-98-5p
TUG1	CTNND1	hsa-miR-145-5p, hsa-miR-29c-3p, hsa-miR-409-3p, hsa-miR-98-5p
TUG1	CPEB4	hsa-let-7b-5p, hsa-miR-145-5p, hsa-miR-26a-5p, hsa-miR-29a-3p, hsa-miR-550a-5p
TUG1	COL4A2	hsa-miR-147b, hsa-miR-210-3p, hsa-miR-29a-3p, hsa-miR-29b-3p, hsa-miR-29c-3p
TUG1	BMPR2	hsa-miR-135a-5p, hsa-miR-135b-5p, hsa-miR-153-3p, hsa-miR-17-5p, hsa-miR-181c-5p, hsa-miR-20a-5p, hsa-miR-21-5p, hsa-miR-92a-3p
TUG1	BCL9	hsa-miR-30a-5p, hsa-miR-30b-5p, hsa-miR-30c-2-3p, hsa-miR-30c-5p, hsa-miR-30d-5p
TUG1	BACH1	hsa-miR-106b-5p, hsa-miR-17-3p, hsa-miR-17-5p, hsa-miR-18a-5p, hsa-miR-196a-5p, hsa-miR-20a-5p, hsa-miR-25-3p, hsa-miR-93-5p
TUG1	ATM	hsa-miR-101-3p, hsa-miR-106a-5p, hsa-miR-181a-5p, hsa-miR-181b-5p, hsa-miR-18a-5p, hsa-miR-223-3p, hsa-miR-26a-5p, hsa-miR-374a-5p, hsa-miR-421
TUG1	APC	hsa-miR-106a-5p, hsa-miR-106b-5p, hsa-miR-129-5p, hsa-miR-135a-5p, hsa-miR-135b-5p, hsa-miR-142-3p, hsa-miR-27a-3p
TUG1	ADAR	hsa-miR-1-3p, hsa-miR-17-5p, hsa-miR-20a-5p, hsa-miR-432-5p
TUG1	ADAM17	hsa-miR-122-5p, hsa-miR-145-5p, hsa-miR-152-3p, hsa-miR-26a-5p, hsa-miR-338-3p
TUG1	ADAM10	hsa-miR-103a-3p, hsa-miR-122-5p, hsa-miR-448, hsa-miR-449a, hsa-miR-655-3p
TUG1	ACTB	hsa-miR-145-5p, hsa-miR-15a-5p, hsa-miR-15b-5p, hsa-miR-16-5p, hsa-miR-28-5p, hsa-miR-29b-3p, hsa-miR-33a-5p, hsa-miR-497-5p
TUG1	SALL4	hsa-miR-107, hsa-miR-219a-5p, hsa-miR-33b-3p, hsa-miR-98-5p
TUG1	RDX	hsa-miR-196a-5p, hsa-miR-196b-5p, hsa-miR-31-5p, hsa-miR-409-3p
TUG1	PPM1D	hsa-miR-145-5p, hsa-miR-153-3p, hsa-miR-15b-5p, hsa-miR-16-5p, hsa-miR-29a-3p
TUG1	PHLPP1	hsa-miR-141-3p, hsa-miR-15a-5p, hsa-miR-17-5p, hsa-miR-18a-5p, hsa-miR-190a-5p, hsa-miR-224-5p, hsa-miR-3127-5p, hsa-miR-375, hsa-miR-92a-3p
TUG1	PARP1	hsa-let-7a-5p, hsa-miR-216b-5p, hsa-miR-223-3p, hsa-miR-335-5p, hsa-miR-708-5p
TUG1	MEF2D	hsa-miR-103a-3p, hsa-miR-122-5p, hsa-miR-17-5p, hsa-miR-18a-5p, hsa-miR-20a-5p
TUG1	MAPK14	hsa-miR-128-3p, hsa-miR-141-3p, hsa-miR-145-5p, hsa-miR-199a-3p, hsa-miR-200a-3p, hsa-miR-24-3p, hsa-miR-27a-3p
TUG1	KLF5	hsa-miR-141-3p, hsa-miR-143-3p, hsa-miR-145-5p, hsa-miR-153-3p
TUG1	KDR	hsa-miR-15b-5p, hsa-miR-16-5p, hsa-miR-17-3p, hsa-miR-195-5p, hsa-miR-199a-3p, hsa-miR-19b-1-5p, hsa-miR-200c-3p, hsa-miR-24-3p, hsa-miR-326
TUG1	ITGA6	hsa-miR-140-3p, hsa-miR-29a-3p, hsa-miR-29b-3p, hsa-miR-29c-3p, hsa-miR-92b-3p
TUG1	DNMT3A	hsa-miR-101-3p, hsa-miR-143-3p, hsa-miR-194-5p, hsa-miR-200c-3p, hsa-miR-29a-3p, hsa-miR-29b-3p, hsa-miR-29c-3p
TUG1	CLIP1	hsa-miR-106b-5p, hsa-miR-17-3p, hsa-miR-17-5p, hsa-miR-18a-5p, hsa-miR-20a-5p, hsa-miR-25-3p, hsa-miR-93-5p
TUG1	BRCA1	hsa-miR-125a-3p, hsa-miR-15a-5p, hsa-miR-16-5p, hsa-miR-182-5p, hsa-miR-206, hsa-miR-20b-5p, hsa-miR-24-3p, hsa-miR-335-5p
TUG1	ACVR2B	hsa-miR-141-3p, hsa-miR-192-5p, hsa-miR-194-5p, hsa-miR-200c-3p, hsa-miR-215-5p
TTTY15	SSSCA1	hsa-miR-124-3p, hsa-miR-150-5p, hsa-miR-196a-5p
TTTY15	SOCS1	hsa-let-7i-5p, hsa-miR-30b-5p, hsa-miR-30d-5p
TTTY15	FOXO3	hsa-miR-23a-3p, hsa-miR-29a-3p, hsa-miR-30c-5p, hsa-miR-96-5p
TTC28-AS1	ERBB4	hsa-miR-302b-3p, hsa-miR-302d-3p, hsa-miR-372-3p
TTC28-AS1	RBL1	hsa-miR-106b-5p, hsa-miR-17-5p, hsa-miR-20a-5p
TTC28-AS1	E2F3	hsa-miR-106b-5p, hsa-miR-125a-5p, hsa-miR-125b-5p, hsa-miR-17-5p, hsa-miR-20a-5p, hsa-miR-874-3p
TTC28-AS1	E2F1	hsa-miR-106a-5p, hsa-miR-106b-5p, hsa-miR-17-5p, hsa-miR-182-5p, hsa-miR-20a-5p, hsa-miR-302b-3p, hsa-miR-330-3p, hsa-miR-519d-3p, hsa-miR-93-5p
TSTD3	FGB	hsa-miR-29a-3p, hsa-miR-29b-3p, hsa-miR-29c-3p
TRHDE-AS1	BCL2L11	hsa-miR-181a-5p, hsa-miR-181b-5p, hsa-miR-488-3p, hsa-miR-9-5p
TRAM2-AS1	HMGA2	hsa-let-7a-5p, hsa-let-7b-5p, hsa-let-7e-5p, hsa-let-7f-5p, hsa-let-7g-5p
TRAF3IP2-AS1	LEF1	hsa-miR-218-5p, hsa-miR-34a-5p, hsa-miR-449a
TRAF3IP2-AS1	CREB1	hsa-miR-10b-5p, hsa-miR-150-5p, hsa-miR-182-5p, hsa-miR-9-5p
TPT1-AS1	CCND2	hsa-let-7a-5p, hsa-let-7b-5p, hsa-miR-206, hsa-miR-98-5p
TPT1-AS1	TNFRSF10B	hsa-let-7a-5p, hsa-let-7b-5p, hsa-let-7c-5p, hsa-let-7d-5p, hsa-let-7e-5p, hsa-let-7g-5p
TPT1-AS1	SPRY2	hsa-miR-23a-3p, hsa-miR-27a-3p, hsa-miR-27b-3p
TPT1-AS1	FOXO1	hsa-miR-186-5p, hsa-miR-27a-3p, hsa-miR-27b-3p
TPT1-AS1	VEGFA	hsa-miR-126-5p, hsa-miR-1-3p, hsa-miR-186-5p, hsa-miR-206, hsa-miR-23b-3p, hsa-miR-27b-3p
TPT1-AS1	IGF1R	hsa-let-7a-5p, hsa-let-7b-5p, hsa-let-7c-5p, hsa-let-7e-5p, hsa-miR-15b-3p, hsa-miR-4458
TP73-AS1	CRKL	hsa-miR-15a-5p, hsa-miR-200b-3p, hsa-miR-200c-3p, hsa-miR-429
TP73-AS1	NKIRAS2	hsa-let-7a-5p, hsa-miR-125b-5p, hsa-miR-29b-3p
TP73-AS1	THRB	hsa-miR-155-5p, hsa-miR-200a-3p, hsa-miR-204-5p, hsa-miR-27a-3p
TP73-AS1	BAP1	hsa-miR-141-3p, hsa-miR-200a-3p, hsa-miR-200b-3p, hsa-miR-200c-3p, hsa-miR-31-5p, hsa-miR-429
TP73-AS1	YAP1	hsa-miR-138-5p, hsa-miR-141-3p, hsa-miR-15a-5p, hsa-miR-16-5p, hsa-miR-195-5p, hsa-miR-199a-3p, hsa-miR-200a-3p, hsa-miR-27a-3p, hsa-miR-506-3p
TP73-AS1	TGFB2	hsa-miR-141-3p, hsa-miR-145-5p, hsa-miR-148a-3p, hsa-miR-199a-5p, hsa-miR-200a-3p, hsa-miR-29b-3p, hsa-miR-378a-3p
TP73-AS1	LEF1	hsa-miR-218-5p, hsa-miR-27a-3p, hsa-miR-34a-5p, hsa-miR-449a
TP73-AS1	SRF	hsa-miR-122-5p, hsa-miR-1-3p, hsa-miR-200a-3p, hsa-miR-9-5p
TP73-AS1	PAK4	hsa-miR-145-5p, hsa-miR-199a-3p, hsa-miR-199b-3p, hsa-miR-22-3p, hsa-miR-24-3p
TP73-AS1	SOX6	hsa-miR-1-3p, hsa-miR-155-5p, hsa-miR-16-5p, hsa-miR-499a-5p
TP73-AS1	LASP1	hsa-miR-138-5p, hsa-miR-1-3p, hsa-miR-206, hsa-miR-218-5p, hsa-miR-29b-3p, hsa-miR-92a-3p
TP73-AS1	PODXL	hsa-miR-125b-5p, hsa-miR-145-5p, hsa-miR-199b-5p
TP73-AS1	PLAG1	hsa-miR-107, hsa-miR-181a-5p, hsa-miR-27a-3p, hsa-miR-424-5p
TP73-AS1	NCSTN	hsa-miR-16-5p, hsa-miR-186-5p, hsa-miR-24-3p
TP73-AS1	IGF2BP1	hsa-let-7a-5p, hsa-let-7b-5p, hsa-let-7g-5p, hsa-miR-9-5p
TP73-AS1	GAPDH	hsa-miR-141-3p, hsa-miR-155-5p, hsa-miR-200a-3p, hsa-miR-29b-3p
TP73-AS1	E2F2	hsa-let-7a-5p, hsa-let-7b-5p, hsa-miR-125b-5p, hsa-miR-155-5p, hsa-miR-214-5p, hsa-miR-218-5p, hsa-miR-24-3p, hsa-miR-31-5p, hsa-miR-98-5p
TP73-AS1	WDR37	hsa-miR-141-3p, hsa-miR-200a-3p, hsa-miR-200b-3p, hsa-miR-200c-3p, hsa-miR-429
TP73-AS1	VEGFA	hsa-miR-107, hsa-miR-125a-5p, hsa-miR-1-3p, hsa-miR-140-5p, hsa-miR-141-3p, hsa-miR-145-5p, hsa-miR-15a-5p, hsa-miR-15b-5p, hsa-miR-16-5p, hsa-miR-181a-5p, hsa-miR-185-5p, hsa-miR-186-5p, hsa-miR-195-5p, hsa-miR-199a-3p, hsa-miR-199a-5p, hsa-miR-200b-3p, hsa-miR-200c-3p, hsa-miR-206, hsa-miR-223-3p, hsa-miR-23b-3p, hsa-miR-27b-3p, hsa-miR-29b-3p, hsa-miR-326, hsa-miR-34a-5p, hsa-miR-378a-3p, hsa-…
TP73-AS1	PIAS3	hsa-miR-125b-5p, hsa-miR-18a-5p, hsa-miR-199a-5p
TP73-AS1	NOTCH2	hsa-miR-107, hsa-miR-181c-5p, hsa-miR-191-5p, hsa-miR-23b-3p, hsa-miR-326, hsa-miR-34a-5p, hsa-miR-9-5p
TP73-AS1	NF1	hsa-miR-107, hsa-miR-10b-5p, hsa-miR-370-3p, hsa-miR-9-5p
TP73-AS1	MAP3K9	hsa-miR-148a-3p, hsa-miR-148b-3p, hsa-miR-24-3p, hsa-miR-34a-5p
TP73-AS1	KLF11	hsa-miR-141-3p, hsa-miR-200a-3p, hsa-miR-200b-3p, hsa-miR-200c-3p, hsa-miR-429
TP73-AS1	HMGA2	hsa-let-7a-5p, hsa-let-7b-5p, hsa-let-7c-5p, hsa-let-7d-5p, hsa-let-7e-5p, hsa-let-7f-5p, hsa-let-7g-5p, hsa-miR-107, hsa-miR-125b-5p, hsa-miR-145-5p, hsa-miR-154-5p, hsa-miR-15a-5p, hsa-miR-16-5p, hsa-miR-204-5p, hsa-miR-23b-3p, hsa-miR-29b-3p, hsa-miR-370-3p, hsa-miR-485-5p, hsa-miR-495-3p, hsa-miR-98-5p
TP73-AS1	HIPK2	hsa-miR-141-3p, hsa-miR-181a-5p, hsa-miR-27a-3p
TP73-AS1	HDAC4	hsa-miR-125a-5p, hsa-miR-1-3p, hsa-miR-140-5p, hsa-miR-22-3p, hsa-miR-29b-3p, hsa-miR-9-5p
TP73-AS1	GSK3B	hsa-miR-129-1-3p, hsa-miR-199a-5p, hsa-miR-27a-3p, hsa-miR-29b-3p, hsa-miR-346, hsa-miR-744-5p, hsa-miR-9-5p
TP73-AS1	FOXJ3	hsa-miR-122-5p, hsa-miR-27b-3p, hsa-miR-494-3p
TP73-AS1	ERBB2IP	hsa-miR-141-3p, hsa-miR-200a-3p, hsa-miR-200b-3p, hsa-miR-200c-3p, hsa-miR-429
TP73-AS1	ERBB2	hsa-miR-125a-5p, hsa-miR-125b-5p, hsa-miR-199a-5p, hsa-miR-199b-5p, hsa-miR-22-3p, hsa-miR-25-3p, hsa-miR-331-3p, hsa-miR-34a-5p
TP73-AS1	DNMT3B	hsa-miR-148a-3p, hsa-miR-200b-3p, hsa-miR-200c-3p, hsa-miR-29b-3p, hsa-miR-506-3p
TP73-AS1	CTNND1	hsa-miR-145-5p, hsa-miR-409-3p, hsa-miR-98-5p
TP73-AS1	CDK6	hsa-let-7a-5p, hsa-let-7b-5p, hsa-miR-103a-3p, hsa-miR-107, hsa-miR-129-2-3p, hsa-miR-145-5p, hsa-miR-16-5p, hsa-miR-185-5p, hsa-miR-191-5p, hsa-miR-195-5p, hsa-miR-200a-3p, hsa-miR-211-5p, hsa-miR-214-5p, hsa-miR-218-5p, hsa-miR-29b-3p, hsa-miR-340-5p, hsa-miR-34a-5p, hsa-miR-34c-5p, hsa-miR-377-3p, hsa-miR-378a-3p, hsa-miR-424-5p, hsa-miR-449a, hsa-miR-449b-5p, hsa-miR-494-3p, hsa-miR-497-5p, h…
TP73-AS1	TCF7L1	hsa-miR-141-3p, hsa-miR-200a-3p, hsa-miR-200b-3p, hsa-miR-200c-3p, hsa-miR-429
TP73-AS1	SHC1	hsa-miR-141-3p, hsa-miR-200a-3p, hsa-miR-200b-3p, hsa-miR-200c-3p, hsa-miR-27b-3p, hsa-miR-429
TP73-AS1	PHLPP1	hsa-miR-141-3p, hsa-miR-15a-5p, hsa-miR-18a-5p, hsa-miR-200b-3p, hsa-miR-331-3p, hsa-miR-92a-3p
TP73-AS1	NCOR2	hsa-miR-100-5p, hsa-miR-10a-5p, hsa-miR-10b-5p, hsa-miR-125b-5p, hsa-miR-16-5p
TP73-AS1	MCM2	hsa-miR-145-5p, hsa-miR-31-5p, hsa-miR-34a-5p
TP73-AS1	ELMO2	hsa-miR-141-3p, hsa-miR-200a-3p, hsa-miR-200b-3p, hsa-miR-200c-3p, hsa-miR-429
TP73-AS1	DDR1	hsa-let-7g-5p, hsa-miR-199a-5p, hsa-miR-199b-5p
TP73-AS1	BMP7	hsa-miR-22-3p, hsa-miR-342-3p, hsa-miR-34a-5p, hsa-miR-542-3p
TMPO-AS1	WEE1	hsa-miR-106b-5p, hsa-miR-17-5p, hsa-miR-20a-5p
TMPO-AS1	RBL1	hsa-miR-106b-5p, hsa-miR-17-5p, hsa-miR-20a-5p
TMPO-AS1	EZH2	hsa-miR-137, hsa-miR-200b-3p, hsa-miR-429
TMPO-AS1	E2F1	hsa-miR-106a-5p, hsa-miR-106b-5p, hsa-miR-17-5p, hsa-miR-20a-5p, hsa-miR-519d-3p, hsa-miR-93-5p
TMPO-AS1	DNMT1	hsa-miR-17-5p, hsa-miR-200b-3p, hsa-miR-20a-5p, hsa-miR-429
TMPO-AS1	MYB	hsa-miR-106a-5p, hsa-miR-200b-3p, hsa-miR-200c-3p, hsa-miR-429
TMPO-AS1	CDK2	hsa-miR-17-5p, hsa-miR-200c-3p, hsa-miR-20a-5p, hsa-miR-376a-3p
TMEM254-AS1	KRAS	hsa-miR-155-5p, hsa-miR-27a-3p, hsa-miR-433-3p
TMEM161B-AS1	PURA	hsa-miR-106b-5p, hsa-miR-20a-5p, hsa-miR-93-5p
TMEM161B-AS1	APC	hsa-miR-106a-5p, hsa-miR-106b-5p, hsa-miR-135a-5p, hsa-miR-27a-3p
TMEM161B-AS1	SMAD5	hsa-miR-135a-5p, hsa-miR-23a-3p, hsa-miR-27a-3p
TMEM161B-AS1	ITGB8	hsa-miR-17-5p, hsa-miR-20a-5p, hsa-miR-93-5p
THUMPD3-AS1	EZH2	hsa-miR-101-3p, hsa-miR-124-3p, hsa-miR-185-5p, hsa-miR-25-3p, hsa-miR-26a-5p, hsa-miR-26b-5p
THUMPD3-AS1	CDC42	hsa-miR-107, hsa-miR-185-5p, hsa-miR-29a-3p, hsa-miR-29b-3p, hsa-miR-29c-3p, hsa-miR-30c-5p
THUMPD3-AS1	CTNNB1	hsa-miR-101-3p, hsa-miR-124-3p, hsa-miR-181a-5p, hsa-miR-200a-5p, hsa-miR-34a-3p, hsa-miR-92a-3p
THRB-AS1	FGA	hsa-miR-29a-3p, hsa-miR-29b-3p, hsa-miR-29c-3p
THRB-AS1	FGB	hsa-miR-29a-3p, hsa-miR-29b-3p, hsa-miR-29c-3p
THAP9-AS1	IKBKB	hsa-miR-132-3p, hsa-miR-218-5p, hsa-miR-28-5p
TEX41	IGF2BP1	hsa-let-7a-5p, hsa-let-7b-5p, hsa-let-7g-5p
TEX41	BCL2L11	hsa-miR-19a-3p, hsa-miR-19b-3p, hsa-miR-301b-3p
SVIL-AS1	CHUK	hsa-miR-15a-5p, hsa-miR-15b-5p, hsa-miR-16-5p, hsa-miR-195-5p
SVIL-AS1	TGFBR2	hsa-miR-142-5p, hsa-miR-19a-3p, hsa-miR-19b-3p, hsa-miR-20a-5p, hsa-miR-23b-5p, hsa-miR-92a-3p, hsa-miR-9-5p
SVIL-AS1	VIM	hsa-miR-132-3p, hsa-miR-26a-5p, hsa-miR-92a-3p, hsa-miR-9-5p
SVIL-AS1	RUNX2	hsa-miR-103a-3p, hsa-miR-195-5p, hsa-miR-221-5p, hsa-miR-30a-3p, hsa-miR-497-5p
SVIL-AS1	NRP1	hsa-miR-148a-3p, hsa-miR-26a-5p, hsa-miR-9-5p
SVIL-AS1	HGF	hsa-miR-16-5p, hsa-miR-26a-5p, hsa-miR-26b-5p
SVIL-AS1	RAF1	hsa-miR-132-3p, hsa-miR-16-5p, hsa-miR-195-5p, hsa-miR-497-5p
SVIL-AS1	CLIC4	hsa-miR-106b-5p, hsa-miR-19a-3p, hsa-miR-19b-3p, hsa-miR-20a-5p, hsa-miR-25-3p
SVIL-AS1	BMPR2	hsa-miR-19a-3p, hsa-miR-19b-3p, hsa-miR-20a-5p, hsa-miR-92a-3p
SVIL-AS1	AXIN2	hsa-miR-107, hsa-miR-15b-5p, hsa-miR-16-5p
SVIL-AS1	RECK	hsa-miR-15a-5p, hsa-miR-15b-5p, hsa-miR-16-5p, hsa-miR-25-3p
SVIL-AS1	FGF2	hsa-miR-16-5p, hsa-miR-195-5p, hsa-miR-424-5p
ST3GAL5-AS1	IL13	hsa-let-7d-5p, hsa-let-7f-5p, hsa-let-7g-5p, hsa-let-7i-5p
ST3GAL5-AS1	MPL	hsa-let-7a-5p, hsa-let-7d-5p, hsa-let-7e-5p, hsa-let-7f-5p
SPAG5-AS1	ERBB2	hsa-miR-125a-5p, hsa-miR-125b-5p, hsa-miR-21-5p
SPAG5-AS1	E2F1	hsa-miR-21-5p, hsa-miR-329-3p, hsa-miR-362-3p
SOX2-OT	FGB	hsa-miR-29a-3p, hsa-miR-29b-3p, hsa-miR-29c-3p
SNRK-AS1	YY1	hsa-miR-34a-5p, hsa-miR-34c-5p, hsa-miR-7-5p
SNRK-AS1	SETD2	hsa-miR-106b-5p, hsa-miR-199a-5p, hsa-miR-199b-5p, hsa-miR-21-5p, hsa-miR-526b-3p
SNRK-AS1	RBL1	hsa-miR-106b-5p, hsa-miR-17-5p, hsa-miR-20a-5p
SNRK-AS1	MFN2	hsa-miR-106a-5p, hsa-miR-106b-5p, hsa-miR-17-5p
SNRK-AS1	HIF1A	hsa-miR-106a-5p, hsa-miR-106b-5p, hsa-miR-138-5p, hsa-miR-17-5p, hsa-miR-199a-5p, hsa-miR-199b-5p, hsa-miR-20a-5p, hsa-miR-20b-5p
SNRK-AS1	E2F3	hsa-miR-106b-5p, hsa-miR-145-5p, hsa-miR-17-5p, hsa-miR-20a-5p, hsa-miR-34a-5p, hsa-miR-34c-5p, hsa-miR-449a
SNRK-AS1	BMPR2	hsa-miR-135a-5p, hsa-miR-135b-5p, hsa-miR-17-5p, hsa-miR-20a-5p, hsa-miR-21-5p
SNRK-AS1	BCL2	hsa-miR-135a-5p, hsa-miR-136-5p, hsa-miR-17-5p, hsa-miR-20a-5p, hsa-miR-21-5p, hsa-miR-34a-5p, hsa-miR-34c-5p, hsa-miR-449a, hsa-miR-7-5p
SNRK-AS1	APC	hsa-miR-106a-5p, hsa-miR-106b-5p, hsa-miR-135a-5p, hsa-miR-135b-5p
SNRK-AS1	ROCK1	hsa-miR-135a-5p, hsa-miR-145-5p, hsa-miR-335-5p
SNRK-AS1	CDK2	hsa-miR-135a-5p, hsa-miR-17-5p, hsa-miR-20a-5p, hsa-miR-302d-3p
SNRK-AS1	CDC25A	hsa-miR-21-5p, hsa-miR-34a-5p, hsa-miR-449a, hsa-miR-449b-5p
SNRK-AS1	APP	hsa-miR-106a-5p, hsa-miR-106b-5p, hsa-miR-17-5p, hsa-miR-20a-5p, hsa-miR-520c-3p
SNHG7	CCND1	hsa-let-7b-5p, hsa-let-7e-5p, hsa-miR-106a-5p, hsa-miR-135a-5p, hsa-miR-138-5p, hsa-miR-152-3p, hsa-miR-15a-5p, hsa-miR-15b-5p, hsa-miR-16-5p, hsa-miR-17-5p, hsa-miR-182-5p, hsa-miR-193a-3p, hsa-miR-193b-3p, hsa-miR-195-5p, hsa-miR-200b-3p, hsa-miR-27a-3p, hsa-miR-296-5p, hsa-miR-338-3p, hsa-miR-377-3p, hsa-miR-424-5p, hsa-miR-425-5p, hsa-miR-490-3p, hsa-miR-497-5p, hsa-miR-503-5p, hsa-miR-708-5p…
SNHG7	SMAD3	hsa-miR-142-5p, hsa-miR-18a-5p, hsa-miR-193b-3p, hsa-miR-199a-5p, hsa-miR-424-5p, hsa-miR-708-5p, hsa-miR-92b-3p
SNHG7	CCNG1	hsa-miR-122-5p, hsa-miR-1271-5p, hsa-miR-27b-3p, hsa-miR-9-5p
SNHG7	SMAD7	hsa-miR-15b-5p, hsa-miR-195-5p, hsa-miR-217, hsa-miR-25-3p, hsa-miR-424-5p, hsa-miR-497-5p, hsa-miR-92b-3p
SNHG7	LATS2	hsa-miR-107, hsa-miR-181b-5p, hsa-miR-181c-5p, hsa-miR-25-3p, hsa-miR-31-5p
SNHG7	CDX2	hsa-miR-106a-5p, hsa-miR-181a-5p, hsa-miR-181b-5p, hsa-miR-181c-5p, hsa-miR-204-5p, hsa-miR-424-5p, hsa-miR-9-5p
SNHG6	CHUK	hsa-miR-223-3p, hsa-miR-23a-3p, hsa-miR-23b-3p, hsa-miR-98-5p
SNHG6	IGF1R	hsa-let-7a-5p, hsa-let-7b-5p, hsa-let-7c-5p, hsa-let-7e-5p, hsa-miR-139-5p, hsa-miR-223-3p, hsa-miR-26b-5p, hsa-miR-4458
SNHG6	ATM	hsa-miR-101-3p, hsa-miR-223-3p, hsa-miR-26a-5p, hsa-miR-374a-5p, hsa-miR-421
SNHG5	ATG12	hsa-miR-200b-5p, hsa-miR-23b-3p, hsa-miR-30b-5p, hsa-miR-30d-5p
SNHG5	TCEAL1	hsa-miR-106b-5p, hsa-miR-17-5p, hsa-miR-20a-5p, hsa-miR-22-3p, hsa-miR-25-3p, hsa-miR-423-3p
SNHG3	E2F2	hsa-let-7a-5p, hsa-let-7b-5p, hsa-miR-125b-5p, hsa-miR-24-3p, hsa-miR-98-5p
SNHG3	TIAM1	hsa-miR-10b-5p, hsa-miR-141-3p, hsa-miR-182-5p, hsa-miR-22-3p
SNHG3	CCNE1	hsa-miR-15a-5p, hsa-miR-15b-5p, hsa-miR-16-5p, hsa-miR-195-5p, hsa-miR-30c-2-3p, hsa-miR-424-5p, hsa-miR-503-5p
SNHG23	KLF4	hsa-miR-135a-5p, hsa-miR-137, hsa-miR-15a-5p, hsa-miR-7-5p
SNHG23	CCND2	hsa-let-7a-5p, hsa-let-7b-5p, hsa-miR-15a-5p, hsa-miR-16-5p, hsa-miR-30c-5p
SNHG23	BDNF	hsa-miR-132-3p, hsa-miR-15a-5p, hsa-miR-16-5p
SNHG23	TGFBR1	hsa-let-7b-5p, hsa-let-7g-5p, hsa-miR-181a-5p, hsa-miR-27b-3p
SNHG23	SPRY2	hsa-miR-23a-3p, hsa-miR-27a-3p, hsa-miR-27b-3p
SNHG23	CDKN1A	hsa-let-7a-5p, hsa-miR-132-3p, hsa-miR-135a-5p, hsa-miR-15a-5p, hsa-miR-16-5p, hsa-miR-181a-5p, hsa-miR-7-5p
SNHG23	SERPINE1	hsa-miR-143-3p, hsa-miR-30b-5p, hsa-miR-30c-5p
SNHG23	NOTCH1	hsa-miR-139-5p, hsa-miR-181a-5p, hsa-miR-23b-3p, hsa-miR-27b-3p, hsa-miR-30b-5p, hsa-miR-30c-5p, hsa-miR-9-5p
SNHG23	GJA1	hsa-miR-218-5p, hsa-miR-23a-3p, hsa-miR-23b-3p
SNHG23	CXCL12	hsa-miR-137, hsa-miR-23a-3p, hsa-miR-27b-3p
SNHG23	COL3A1	hsa-let-7b-5p, hsa-let-7d-5p, hsa-miR-143-3p
SNHG23	WEE1	hsa-miR-15a-5p, hsa-miR-15b-5p, hsa-miR-16-5p, hsa-miR-195-5p, hsa-miR-27a-3p, hsa-miR-27b-3p, hsa-miR-497-5p
SNHG23	SIRT1	hsa-miR-132-3p, hsa-miR-181a-5p, hsa-miR-23b-3p, hsa-miR-9-5p
SNHG23	IGF1R	hsa-let-7a-5p, hsa-let-7b-5p, hsa-miR-139-5p, hsa-miR-143-3p, hsa-miR-16-5p, hsa-miR-497-5p, hsa-miR-7-5p
SNHG23	HMGA2	hsa-let-7a-5p, hsa-let-7b-5p, hsa-let-7d-5p, hsa-let-7f-5p, hsa-let-7g-5p, hsa-miR-15a-5p, hsa-miR-16-5p, hsa-miR-23b-3p
SNHG23	DICER1	hsa-let-7a-5p, hsa-let-7d-5p, hsa-miR-195-5p, hsa-miR-497-5p, hsa-miR-9-5p
SNHG23	RUNX1	hsa-miR-181a-5p, hsa-miR-27b-3p, hsa-miR-9-5p
SNHG23	KDR	hsa-miR-15b-5p, hsa-miR-16-5p, hsa-miR-195-5p
SNHG23	APP	hsa-let-7a-5p, hsa-let-7d-5p, hsa-miR-15a-5p, hsa-miR-16-5p
SNHG20	SIRT7	hsa-miR-125a-5p, hsa-miR-125b-5p, hsa-miR-34a-5p
SNHG20	FOXO3	hsa-miR-182-5p, hsa-miR-217, hsa-miR-23a-3p, hsa-miR-29a-3p, hsa-miR-96-5p
SNHG17	TUSC2	hsa-miR-19a-3p, hsa-miR-378a-3p, hsa-miR-378a-5p
SNHG17	PIN1	hsa-miR-140-5p, hsa-miR-200b-3p, hsa-miR-200c-3p, hsa-miR-296-5p
SNHG17	DNMT3B	hsa-miR-200b-3p, hsa-miR-200c-3p, hsa-miR-26a-5p, hsa-miR-29a-3p, hsa-miR-29b-3p, hsa-miR-29c-3p
SNHG17	TDG	hsa-miR-26a-5p, hsa-miR-29a-3p, hsa-miR-29b-3p, hsa-miR-29c-3p
SNHG17	ELMO2	hsa-miR-200b-3p, hsa-miR-200c-3p, hsa-miR-429
SNHG14	YAP1	hsa-miR-138-5p, hsa-miR-15a-5p, hsa-miR-16-5p, hsa-miR-195-5p, hsa-miR-27a-3p, hsa-miR-375
SNHG14	LDHB	hsa-miR-23a-3p, hsa-miR-24-3p, hsa-miR-375
SNHG14	SRC	hsa-miR-23b-3p, hsa-miR-33a-5p, hsa-miR-33b-5p, hsa-miR-34a-5p
SNHG14	HDAC4	hsa-miR-125a-5p, hsa-miR-1-3p, hsa-miR-22-3p, hsa-miR-29b-3p, hsa-miR-30c-5p, hsa-miR-9-5p
SNHG14	BMPR2	hsa-miR-135a-5p, hsa-miR-135b-5p, hsa-miR-17-5p, hsa-miR-19a-3p, hsa-miR-19b-3p
SNHG14	BCL9	hsa-miR-218-5p, hsa-miR-30b-5p, hsa-miR-30c-2-3p, hsa-miR-30c-5p
SNHG14	ATM	hsa-miR-101-3p, hsa-miR-181a-5p, hsa-miR-18a-5p, hsa-miR-26a-5p, hsa-miR-374a-5p
SNHG14	NTRK3	hsa-miR-125a-5p, hsa-miR-125b-5p, hsa-miR-148a-3p, hsa-miR-185-5p, hsa-miR-22-3p, hsa-miR-485-3p, hsa-miR-625-5p, hsa-miR-9-5p
SNHG14	LAMC1	hsa-miR-124-3p, hsa-miR-29b-3p, hsa-miR-29c-3p
SNHG14	CTNNB1	hsa-miR-101-3p, hsa-miR-124-3p, hsa-miR-181a-5p, hsa-miR-23b-3p, hsa-miR-320a, hsa-miR-34a-3p, hsa-miR-375
SNHG14	CDH2	hsa-miR-124-3p, hsa-miR-145-5p, hsa-miR-218-5p, hsa-miR-338-3p, hsa-miR-34a-5p
SNHG14	BMP7	hsa-miR-137, hsa-miR-22-3p, hsa-miR-34a-5p
SNHG14	APP	hsa-let-7a-5p, hsa-let-7d-5p, hsa-miR-101-3p, hsa-miR-130a-3p, hsa-miR-15a-5p, hsa-miR-16-5p, hsa-miR-17-5p
SNHG12	E2F2	hsa-let-7a-5p, hsa-let-7b-5p, hsa-miR-214-5p, hsa-miR-218-5p, hsa-miR-31-3p, hsa-miR-98-5p
SNHG12	SIAH1	hsa-miR-107, hsa-miR-135a-5p, hsa-miR-424-5p
SNHG12	IKBKB	hsa-miR-199a-5p, hsa-miR-200b-3p, hsa-miR-200c-3p, hsa-miR-218-5p, hsa-miR-451a, hsa-miR-497-5p, hsa-miR-503-5p
SNHG12	ESRRA	hsa-miR-135a-5p, hsa-miR-137, hsa-miR-497-5p
SNHG12	CDC42	hsa-miR-107, hsa-miR-137, hsa-miR-185-5p, hsa-miR-195-5p, hsa-miR-216a-5p, hsa-miR-224-5p
SNHG12	NFKB1	hsa-miR-138-5p, hsa-miR-139-5p, hsa-miR-146a-5p, hsa-miR-146b-5p, hsa-miR-199a-5p
SNHG12	CCL5	hsa-miR-146a-5p, hsa-miR-214-3p, hsa-miR-98-5p
SNAI3-AS1	DNMT3A	hsa-miR-29a-3p, hsa-miR-29b-3p, hsa-miR-29c-3p
SLC37A4	BCL2L2	hsa-miR-129-2-3p, hsa-miR-195-5p, hsa-miR-335-5p
SLC37A4	BACE1	hsa-miR-107, hsa-miR-29a-3p, hsa-miR-29b-3p, hsa-miR-29c-3p
SLC37A4	NOD2	hsa-miR-320a, hsa-miR-320b, hsa-miR-320c
SLC37A4	NASP	hsa-miR-29a-3p, hsa-miR-29b-3p, hsa-miR-29c-3p
SLC37A4	DNMT3B	hsa-miR-29a-3p, hsa-miR-29b-3p, hsa-miR-29c-3p
SLC37A4	SP1	hsa-miR-223-3p, hsa-miR-27a-3p, hsa-miR-29b-3p, hsa-miR-29c-3p, hsa-miR-335-5p
SLC37A4	BIRC5	hsa-miR-195-5p, hsa-miR-335-5p, hsa-miR-494-3p
SLC26A4-AS1	CCND3	hsa-miR-15b-5p, hsa-miR-16-5p, hsa-miR-195-5p, hsa-miR-497-5p
SLC26A4-AS1	BBC3	hsa-miR-15a-5p, hsa-miR-16-5p, hsa-miR-221-3p
SLC25A5-AS1	NOD2	hsa-miR-320a, hsa-miR-320b, hsa-miR-320c
SH3BP5-AS1	VEGFA	hsa-miR-15a-5p, hsa-miR-15b-5p, hsa-miR-16-5p, hsa-miR-195-5p
SH3BP5-AS1	TAB3	hsa-miR-15a-5p, hsa-miR-15b-5p, hsa-miR-16-5p, hsa-miR-195-5p
SH3BP5-AS1	PURA	hsa-miR-15a-5p, hsa-miR-15b-5p, hsa-miR-16-5p
SH3BP5-AS1	ACTB	hsa-miR-15a-5p, hsa-miR-15b-5p, hsa-miR-16-5p
SBF2-AS1	RBL1	hsa-miR-106b-5p, hsa-miR-17-5p, hsa-miR-20a-5p
SATB1-AS1	HMGA2	hsa-let-7a-5p, hsa-let-7b-5p, hsa-let-7f-5p, hsa-let-7g-5p, hsa-miR-107
SATB1-AS1	CDK6	hsa-let-7a-5p, hsa-let-7b-5p, hsa-miR-103a-3p, hsa-miR-107
RP5-991G20.1	WEE1	hsa-miR-15a-5p, hsa-miR-15b-5p, hsa-miR-16-5p, hsa-miR-195-5p, hsa-miR-424-5p, hsa-miR-497-5p
RP5-991G20.1	BCL2	hsa-miR-15a-5p, hsa-miR-15b-5p, hsa-miR-16-5p, hsa-miR-192-5p, hsa-miR-195-5p, hsa-miR-205-5p, hsa-miR-497-5p
RP5-991G20.1	CHEK1	hsa-miR-15a-5p, hsa-miR-15b-5p, hsa-miR-16-5p, hsa-miR-195-5p, hsa-miR-424-5p, hsa-miR-497-5p
RP5-991G20.1	CDC25A	hsa-miR-15a-5p, hsa-miR-195-5p, hsa-miR-424-5p, hsa-miR-497-5p
RP5-1184F4.5	NOTCH1	hsa-miR-34a-5p, hsa-miR-34c-5p, hsa-miR-449a
RP5-1184F4.5	ERBB2	hsa-miR-125a-5p, hsa-miR-125b-5p, hsa-miR-34a-5p
RP5-1184F4.5	CDK6	hsa-miR-34a-5p, hsa-miR-34c-5p, hsa-miR-449a, hsa-miR-449b-5p
RP5-1184F4.5	MYCN	hsa-miR-34a-5p, hsa-miR-34c-5p, hsa-miR-449a, hsa-miR-449b-5p
RP5-1142A6.9	DICER1	hsa-let-7a-5p, hsa-let-7c-5p, hsa-let-7d-5p
RP5-1142A6.2	FOXO3	hsa-miR-182-5p, hsa-miR-93-5p, hsa-miR-96-5p
RP5-1112D6.4	HMGA1	hsa-let-7a-5p, hsa-let-7b-5p, hsa-miR-124-3p, hsa-miR-15a-5p, hsa-miR-16-5p, hsa-miR-195-5p, hsa-miR-196a-5p
RP5-1112D6.4	SMAD7	hsa-miR-15b-5p, hsa-miR-195-5p, hsa-miR-424-5p, hsa-miR-497-5p
RP5-1112D6.4	PLAG1	hsa-miR-107, hsa-miR-144-3p, hsa-miR-27a-3p, hsa-miR-424-5p
RP5-1112D6.4	NOTCH1	hsa-miR-101-3p, hsa-miR-144-3p, hsa-miR-23b-3p, hsa-miR-27b-3p, hsa-miR-34b-3p
RP5-1112D6.4	MTOR	hsa-let-7c-5p, hsa-miR-101-3p, hsa-miR-144-3p, hsa-miR-16-5p, hsa-miR-196b-5p, hsa-miR-497-5p
RP5-1112D6.4	DICER1	hsa-let-7a-5p, hsa-let-7c-5p, hsa-let-7d-5p, hsa-miR-103a-3p, hsa-miR-107, hsa-miR-195-5p, hsa-miR-497-5p
RP5-1112D6.4	CDC42	hsa-miR-107, hsa-miR-137, hsa-miR-195-5p, hsa-miR-330-3p
RP5-1112D6.4	MYB	hsa-miR-103a-3p, hsa-miR-107, hsa-miR-15a-5p, hsa-miR-16-5p, hsa-miR-195-5p, hsa-miR-424-5p
RP5-1112D6.4	E2F6	hsa-let-7a-5p, hsa-miR-124-3p, hsa-miR-137, hsa-miR-151a-5p, hsa-miR-27a-3p, hsa-miR-28-5p
RP5-1112D6.4	CTNNB1	hsa-miR-101-3p, hsa-miR-124-3p, hsa-miR-200a-5p, hsa-miR-23b-3p, hsa-miR-34a-3p, hsa-miR-34c-3p, hsa-miR-92a-3p
RP5-1112D6.4	CREB1	hsa-miR-103a-3p, hsa-miR-27a-3p, hsa-miR-27b-3p, hsa-miR-34b-3p, hsa-miR-582-5p
RP4-781K5.2	LIMK1	hsa-miR-106a-5p, hsa-miR-143-3p, hsa-miR-17-5p, hsa-miR-20a-5p, hsa-miR-20b-5p
RP4-781K5.2	WNT1	hsa-miR-148a-3p, hsa-miR-148b-3p, hsa-miR-152-3p
RP4-773N10.4	HDAC4	hsa-miR-1-3p, hsa-miR-22-3p, hsa-miR-30c-5p
RP4-773N10.4	BCL9	hsa-miR-30b-5p, hsa-miR-30c-2-3p, hsa-miR-30c-5p, hsa-miR-30d-5p
RP4-773N10.4	MPL	hsa-let-7a-5p, hsa-let-7f-5p, hsa-miR-1-3p
RP4-614O4.11	YAP1	hsa-miR-138-5p, hsa-miR-195-5p, hsa-miR-199a-3p
RP4-614O4.11	BCL2L2	hsa-miR-125b-5p, hsa-miR-129-2-3p, hsa-miR-195-5p
RP4-614O4.11	STAT3	hsa-miR-124-3p, hsa-miR-125a-5p, hsa-miR-125b-5p, hsa-miR-21-5p
RP4-614O4.11	CDK6	hsa-miR-124-3p, hsa-miR-129-2-3p, hsa-miR-195-5p, hsa-miR-497-5p
RP4-614O4.11	BCL2	hsa-miR-125a-5p, hsa-miR-125b-5p, hsa-miR-195-5p, hsa-miR-21-5p, hsa-miR-497-5p
RP4-601P9.1	DICER1	hsa-miR-103a-3p, hsa-miR-107, hsa-miR-195-5p, hsa-miR-497-5p
RP3-486I3.7	KRAS	hsa-miR-181a-5p, hsa-miR-181c-5p, hsa-miR-199a-5p, hsa-miR-543
RP3-475N16.1	MYC	hsa-miR-135a-5p, hsa-miR-185-5p, hsa-miR-21-5p, hsa-miR-34a-5p
RP3-405J10.3	DICER1	hsa-miR-103a-3p, hsa-miR-107, hsa-miR-195-5p, hsa-miR-497-5p
RP3-325F22.3	KAT2B	hsa-miR-106b-5p, hsa-miR-17-5p, hsa-miR-93-5p
RP3-325F22.3	STAT3	hsa-miR-106a-5p, hsa-miR-106b-5p, hsa-miR-130b-3p, hsa-miR-17-5p, hsa-miR-20a-5p, hsa-miR-20b-5p, hsa-miR-519d-3p, hsa-miR-520c-3p
RP3-325F22.3	CLIP1	hsa-miR-106b-5p, hsa-miR-17-5p, hsa-miR-20a-5p, hsa-miR-93-5p
RP13-638C3.4	BIRC5	hsa-miR-150-5p, hsa-miR-335-5p, hsa-miR-34a-5p
RP13-638C3.4	ACVR2B	hsa-miR-192-5p, hsa-miR-194-5p, hsa-miR-215-5p
RP13-516M14.1	TET2	hsa-miR-29a-3p, hsa-miR-29b-3p, hsa-miR-29c-3p
RP13-516M14.1	SETD2	hsa-miR-186-5p, hsa-miR-199a-5p, hsa-miR-199b-5p
RP13-516M14.1	MCL1	hsa-miR-29a-3p, hsa-miR-29b-3p, hsa-miR-29c-3p, hsa-miR-339-3p, hsa-miR-876-3p
RP1-257A7.4	SIRT1	hsa-miR-181a-5p, hsa-miR-181b-5p, hsa-miR-181c-5p, hsa-miR-543
RP1-239B22.5	GATA6	hsa-miR-181a-5p, hsa-miR-181b-5p, hsa-miR-181c-5p
RP1-239B22.5	CDK4	hsa-miR-124-3p, hsa-miR-1-3p, hsa-miR-145-5p, hsa-miR-206, hsa-miR-539-5p, hsa-miR-613
RP1-225E12.2	TAB3	hsa-miR-15a-5p, hsa-miR-15b-5p, hsa-miR-16-5p, hsa-miR-195-5p, hsa-miR-497-5p
RP1-225E12.2	ACTB	hsa-miR-15a-5p, hsa-miR-15b-5p, hsa-miR-16-5p, hsa-miR-497-5p
RP11-98I9.4	MDM2	hsa-miR-18b-5p, hsa-miR-25-3p, hsa-miR-32-5p, hsa-miR-367-3p
RP11-98I9.4	PRMT5	hsa-miR-25-3p, hsa-miR-32-5p, hsa-miR-92b-3p
RP11-96D1.11	CDH1	hsa-miR-204-5p, hsa-miR-23a-3p, hsa-miR-25-3p, hsa-miR-92a-3p
RP11-96D1.11	MDM2	hsa-miR-25-3p, hsa-miR-32-5p, hsa-miR-367-3p
RP11-96D1.11	ERBB2	hsa-miR-22-3p, hsa-miR-25-3p, hsa-miR-331-3p
RP11-96D1.11	SP1	hsa-miR-137, hsa-miR-22-3p, hsa-miR-335-5p
RP11-864G5.3	FOXO1	hsa-miR-186-5p, hsa-miR-27a-3p, hsa-miR-27b-3p
RP11-864G5.3	CREB1	hsa-miR-27a-3p, hsa-miR-27b-3p, hsa-miR-582-5p
RP11-840I19.3	PIK3R1	hsa-miR-128-3p, hsa-miR-155-5p, hsa-miR-487a-3p
RP11-840I19.3	EGFR	hsa-miR-128-3p, hsa-miR-27a-3p, hsa-miR-27b-3p, hsa-miR-491-5p
RP11-840I19.3	MYC	hsa-miR-155-5p, hsa-miR-24-3p, hsa-miR-744-5p
RP11-819C21.1	WASF3	hsa-miR-200b-3p, hsa-miR-218-5p, hsa-miR-429
RP11-819C21.1	ZFPM2	hsa-miR-200b-3p, hsa-miR-200c-3p, hsa-miR-429
RP11-819C21.1	XIAP	hsa-miR-130a-3p, hsa-miR-186-5p, hsa-miR-200b-3p, hsa-miR-200c-3p, hsa-miR-429
RP11-819C21.1	STAT3	hsa-let-7a-5p, hsa-let-7c-5p, hsa-miR-106a-5p, hsa-miR-130b-3p, hsa-miR-223-3p, hsa-miR-340-5p
RP11-819C21.1	SMAD2	hsa-let-7g-5p, hsa-miR-132-3p, hsa-miR-145-5p, hsa-miR-200b-3p, hsa-miR-212-3p, hsa-miR-27a-3p, hsa-miR-27b-3p, hsa-miR-323a-3p
RP11-819C21.1	RPS6KB1	hsa-miR-145-5p, hsa-miR-16-5p, hsa-miR-200c-3p, hsa-miR-218-5p
RP11-819C21.1	RICTOR	hsa-let-7c-5p, hsa-miR-16-5p, hsa-miR-218-5p
RP11-819C21.1	MBNL1	hsa-miR-30a-5p, hsa-miR-30b-5p, hsa-miR-30e-5p
RP11-819C21.1	KLF11	hsa-miR-200b-3p, hsa-miR-200c-3p, hsa-miR-429
RP11-819C21.1	ERBB2IP	hsa-miR-200b-3p, hsa-miR-200c-3p, hsa-miR-429
RP11-819C21.1	DICER1	hsa-let-7a-5p, hsa-let-7c-5p, hsa-let-7d-5p, hsa-miR-130a-3p, hsa-miR-130b-3p, hsa-miR-200c-3p, hsa-miR-221-3p, hsa-miR-222-3p, hsa-miR-374a-5p
RP11-819C21.1	CTNND1	hsa-miR-145-5p, hsa-miR-409-3p, hsa-miR-98-5p
RP11-819C21.1	BCL9	hsa-miR-218-5p, hsa-miR-30a-5p, hsa-miR-30b-5p, hsa-miR-30c-5p, hsa-miR-30d-5p
RP11-819C21.1	ATM	hsa-miR-101-5p, hsa-miR-106a-5p, hsa-miR-223-3p, hsa-miR-374a-5p
RP11-819C21.1	SP1	hsa-miR-145-5p, hsa-miR-200b-3p, hsa-miR-200c-3p, hsa-miR-218-5p, hsa-miR-223-3p, hsa-miR-27a-3p, hsa-miR-335-5p, hsa-miR-429
RP11-819C21.1	SHC1	hsa-miR-200b-3p, hsa-miR-200c-3p, hsa-miR-27b-3p, hsa-miR-365a-3p, hsa-miR-429
RP11-819C21.1	RIN2	hsa-miR-200b-3p, hsa-miR-200c-3p, hsa-miR-429
RP11-819C21.1	RDX	hsa-miR-196a-5p, hsa-miR-196b-5p, hsa-miR-409-3p
RP11-819C21.1	RB1	hsa-let-7a-5p, hsa-miR-106a-5p, hsa-miR-132-3p, hsa-miR-212-3p, hsa-miR-221-3p, hsa-miR-335-5p
RP11-819C21.1	MBNL2	hsa-miR-218-5p, hsa-miR-30a-5p, hsa-miR-30b-5p, hsa-miR-30e-5p
RP11-819C21.1	KLHL20	hsa-miR-200b-3p, hsa-miR-200c-3p, hsa-miR-429
RP11-817O13.8	MGMT	hsa-miR-30d-5p, hsa-miR-370-3p, hsa-miR-409-3p
RP11-805J14.5	RAC1	hsa-miR-122-5p, hsa-miR-146a-5p, hsa-miR-224-5p
RP11-802E16.3	HMGA1	hsa-miR-125b-5p, hsa-miR-15a-5p, hsa-miR-16-5p, hsa-miR-195-5p
RP11-802E16.3	HDGF	hsa-miR-16-5p, hsa-miR-214-3p, hsa-miR-497-5p
RP11-802E16.3	ACTB	hsa-miR-15a-5p, hsa-miR-15b-5p, hsa-miR-16-5p, hsa-miR-497-5p
RP11-802E16.3	MYB	hsa-miR-103a-3p, hsa-miR-107, hsa-miR-15a-5p, hsa-miR-16-5p, hsa-miR-195-5p, hsa-miR-424-5p
RP11-7K24.3	LY75	hsa-miR-106b-5p, hsa-miR-17-5p, hsa-miR-20a-5p, hsa-miR-93-5p
RP11-7K24.3	YOD1	hsa-miR-106b-5p, hsa-miR-17-5p, hsa-miR-20a-5p, hsa-miR-93-5p
RP11-7K24.3	VEGFA	hsa-miR-106b-5p, hsa-miR-17-5p, hsa-miR-20a-5p, hsa-miR-20b-5p, hsa-miR-93-5p
RP11-7K24.3	STAT3	hsa-miR-106b-5p, hsa-miR-17-5p, hsa-miR-20a-5p, hsa-miR-20b-5p
RP11-7K24.3	PURA	hsa-miR-106b-5p, hsa-miR-20a-5p, hsa-miR-93-5p
RP11-7K24.3	HIF1A	hsa-miR-106b-5p, hsa-miR-17-5p, hsa-miR-20a-5p, hsa-miR-20b-5p
RP11-7K24.3	ZBTB4	hsa-miR-106b-5p, hsa-miR-17-5p, hsa-miR-93-5p
RP11-7K24.3	ITGB8	hsa-miR-17-5p, hsa-miR-20a-5p, hsa-miR-93-5p
RP11-79H23.3	IL6R	hsa-miR-23a-3p, hsa-miR-34a-5p, hsa-miR-34c-5p
RP11-79H23.3	PBX3	hsa-miR-144-3p, hsa-miR-181a-5p, hsa-miR-181b-5p
RP11-79H23.3	MYC	hsa-miR-212-3p, hsa-miR-21-5p, hsa-miR-34a-5p, hsa-miR-34c-5p, hsa-miR-449a, hsa-miR-494-3p
RP11-77H9.2	PPP1R13B	hsa-miR-29a-3p, hsa-miR-29b-3p, hsa-miR-29c-3p
RP11-77H9.2	LASP1	hsa-miR-218-5p, hsa-miR-29b-3p, hsa-miR-92a-3p
RP11-77H9.2	ERBB3	hsa-miR-125a-5p, hsa-miR-125b-5p, hsa-miR-199a-5p
RP11-77H9.2	FOXM1	hsa-miR-149-5p, hsa-miR-204-5p, hsa-miR-24-3p
RP11-77H9.2	TET2	hsa-miR-125b-5p, hsa-miR-29a-3p, hsa-miR-29b-3p, hsa-miR-29c-3p, hsa-miR-7-5p
RP11-77H9.2	STAT3	hsa-miR-106b-5p, hsa-miR-125a-5p, hsa-miR-125b-5p, hsa-miR-20a-5p, hsa-miR-21-3p, hsa-miR-29b-3p, hsa-miR-92a-3p
RP11-77H9.2	SMAD4	hsa-miR-125a-5p, hsa-miR-125b-5p, hsa-miR-183-5p, hsa-miR-199a-5p, hsa-miR-204-5p, hsa-miR-20a-5p
RP11-77H9.2	SETD2	hsa-miR-106b-5p, hsa-miR-199a-5p, hsa-miR-199b-5p
RP11-77H9.2	IGF1R	hsa-miR-122-5p, hsa-miR-125b-5p, hsa-miR-140-5p, hsa-miR-145-5p, hsa-miR-223-5p, hsa-miR-7-5p
RP11-77H9.2	GSK3B	hsa-miR-183-5p, hsa-miR-199a-5p, hsa-miR-29a-3p, hsa-miR-29b-3p, hsa-miR-9-5p
RP11-77H9.2	E2F3	hsa-miR-106b-5p, hsa-miR-125a-5p, hsa-miR-125b-5p, hsa-miR-145-5p, hsa-miR-20a-5p
RP11-77H9.2	BMPR2	hsa-miR-135a-5p, hsa-miR-135b-5p, hsa-miR-20a-5p, hsa-miR-92a-3p
RP11-77H9.2	BCL2L11	hsa-miR-106b-5p, hsa-miR-20a-5p, hsa-miR-24-3p, hsa-miR-25-3p, hsa-miR-32-5p, hsa-miR-92a-3p, hsa-miR-9-5p
RP11-77H9.2	ABCC1	hsa-miR-145-5p, hsa-miR-7-5p, hsa-miR-9-5p
RP11-77H9.2	SP1	hsa-miR-145-5p, hsa-miR-149-5p, hsa-miR-218-5p, hsa-miR-24-3p, hsa-miR-29b-3p, hsa-miR-29c-3p
RP11-77H9.2	LRP6	hsa-miR-183-5p, hsa-miR-29b-3p, hsa-miR-29c-3p
RP11-77H9.2	CLIP1	hsa-miR-106b-5p, hsa-miR-20a-5p, hsa-miR-25-3p
RP11-760H22.2	ESR1	hsa-miR-19a-3p, hsa-miR-19b-3p, hsa-miR-221-3p
RP11-758M4.4	AKT2	hsa-let-7b-5p, hsa-let-7g-5p, hsa-miR-148a-5p
RP11-758M4.4	IGF2BP1	hsa-let-7a-5p, hsa-let-7b-5p, hsa-let-7g-5p
RP11-758M4.4	AURKB	hsa-let-7a-5p, hsa-let-7e-5p, hsa-let-7i-5p
RP11-758M4.4	KRAS	hsa-let-7a-5p, hsa-let-7f-5p, hsa-let-7g-5p, hsa-miR-199a-5p, hsa-miR-365a-3p
RP11-758M4.4	HMGA2	hsa-let-7a-5p, hsa-let-7b-5p, hsa-let-7c-5p, hsa-let-7d-5p, hsa-let-7e-5p, hsa-let-7f-5p, hsa-let-7g-5p, hsa-miR-98-5p
RP11-758M4.4	NRAS	hsa-let-7a-5p, hsa-let-7b-5p, hsa-let-7c-5p, hsa-miR-98-5p
RP11-758M4.4	CDC25A	hsa-let-7b-5p, hsa-let-7c-5p, hsa-miR-365a-3p
RP11-727A23.5	SP1	hsa-miR-137, hsa-miR-218-5p, hsa-miR-375
RP11-714G18.1	EGFR	hsa-miR-128-3p, hsa-miR-27a-3p, hsa-miR-27b-3p
RP11-714G18.1	SMAD2	hsa-miR-128-3p, hsa-miR-27a-3p, hsa-miR-27b-3p
RP11-6O2.4	TAB3	hsa-miR-15a-5p, hsa-miR-15b-5p, hsa-miR-16-5p, hsa-miR-195-5p
RP11-6O2.4	MTOR	hsa-miR-100-5p, hsa-miR-16-5p, hsa-miR-99a-5p
RP11-6O2.4	IGF1R	hsa-miR-100-5p, hsa-miR-16-5p, hsa-miR-185-5p, hsa-miR-99a-5p
RP11-6O2.4	CHEK1	hsa-miR-15a-5p, hsa-miR-15b-5p, hsa-miR-16-5p, hsa-miR-195-5p
RP11-69E11.8	CDK6	hsa-miR-185-5p, hsa-miR-378a-3p, hsa-miR-491-5p
RP11-66B24.4	IGF1R	hsa-let-7a-5p, hsa-let-7b-5p, hsa-let-7e-5p, hsa-miR-145-5p, hsa-miR-181b-5p
RP11-649E7.5	SMAD7	hsa-miR-15b-5p, hsa-miR-185-5p, hsa-miR-195-5p, hsa-miR-424-5p, hsa-miR-497-5p
RP11-627G23.1	NLK	hsa-miR-181a-5p, hsa-miR-181b-5p, hsa-miR-181c-5p
RP11-627G23.1	PTEN	hsa-miR-10a-5p, hsa-miR-10b-5p, hsa-miR-181a-5p, hsa-miR-181b-5p, hsa-miR-181c-5p, hsa-miR-190b
RP11-626G11.3	TGFBR2	hsa-miR-106a-5p, hsa-miR-17-5p, hsa-miR-20a-5p, hsa-miR-302b-3p, hsa-miR-302d-3p, hsa-miR-372-3p, hsa-miR-373-3p, hsa-miR-520a-3p
RP11-626G11.3	LIMK1	hsa-miR-106a-5p, hsa-miR-17-5p, hsa-miR-20a-5p, hsa-miR-20b-5p
RP11-611O2.5	TP53INP1	hsa-miR-17-5p, hsa-miR-182-5p, hsa-miR-20a-5p, hsa-miR-93-5p, hsa-miR-96-5p
RP11-611O2.5	DAZAP2	hsa-miR-106b-5p, hsa-miR-17-5p, hsa-miR-20a-5p, hsa-miR-302a-3p, hsa-miR-93-5p
RP11-611O2.5	MYB	hsa-miR-106a-5p, hsa-miR-200b-3p, hsa-miR-200c-3p, hsa-miR-429
RP11-611O2.5	CLIP1	hsa-miR-106b-5p, hsa-miR-17-5p, hsa-miR-20a-5p, hsa-miR-93-5p
RP11-611O2.5	CDK4	hsa-miR-182-5p, hsa-miR-24-3p, hsa-miR-302a-3p, hsa-miR-377-3p, hsa-miR-506-3p
RP11-611O2.5	CDK2	hsa-miR-17-5p, hsa-miR-200c-3p, hsa-miR-20a-5p, hsa-miR-302a-3p, hsa-miR-302b-3p, hsa-miR-302d-3p, hsa-miR-372-3p
RP11-585P4.5	ERBB2	hsa-miR-125a-5p, hsa-miR-125b-5p, hsa-miR-331-3p, hsa-miR-375
RP11-582J16.4	VEGFA	hsa-miR-15a-5p, hsa-miR-15b-5p, hsa-miR-16-5p, hsa-miR-195-5p
RP11-54O7.1	YAP1	hsa-miR-15a-5p, hsa-miR-16-5p, hsa-miR-195-5p, hsa-miR-375
RP11-54O7.1	CDK6	hsa-miR-103a-3p, hsa-miR-107, hsa-miR-16-5p, hsa-miR-195-5p, hsa-miR-30a-3p, hsa-miR-424-5p, hsa-miR-497-5p
RP11-54O7.1	FGFR1	hsa-miR-16-5p, hsa-miR-296-5p, hsa-miR-424-5p, hsa-miR-503-5p
RP11-539L10.2	WNT1	hsa-miR-148a-3p, hsa-miR-148b-3p, hsa-miR-152-3p
RP11-539I5.1	CDK4	hsa-miR-124-3p, hsa-miR-34b-3p, hsa-miR-377-3p
RP11-531A24.3	SMAD1	hsa-miR-30a-5p, hsa-miR-30b-5p, hsa-miR-30c-5p, hsa-miR-30d-5p
RP11-531A24.3	GATA6	hsa-miR-181a-5p, hsa-miR-181b-5p, hsa-miR-181c-5p
RP11-521B24.5	AKT1	hsa-miR-138-5p, hsa-miR-143-3p, hsa-miR-494-3p
RP11-513I15.6	SOX4	hsa-miR-129-5p, hsa-miR-204-5p, hsa-miR-211-5p
RP11-513I15.6	CDK6	hsa-miR-129-5p, hsa-miR-211-5p, hsa-miR-214-5p, hsa-miR-377-3p, hsa-miR-491-5p
RP11-498C9.3	LIMK1	hsa-miR-106a-5p, hsa-miR-17-5p, hsa-miR-20a-5p, hsa-miR-20b-5p
RP11-498C9.3	EGFR	hsa-miR-122-5p, hsa-miR-133b, hsa-miR-218-5p, hsa-miR-302b-3p, hsa-miR-491-5p, hsa-miR-520b, hsa-miR-520e
RP11-498C9.3	AKT1	hsa-miR-122-5p, hsa-miR-133b, hsa-miR-17-5p, hsa-miR-302a-3p, hsa-miR-302b-3p, hsa-miR-302d-3p, hsa-miR-495-3p
RP11-498C9.3	PDGFRA	hsa-miR-130a-3p, hsa-miR-130b-3p, hsa-miR-218-5p
RP11-498C9.3	MMP2	hsa-miR-106b-5p, hsa-miR-130b-3p, hsa-miR-17-5p, hsa-miR-218-5p, hsa-miR-491-5p
RP11-498C9.3	TIMP2	hsa-miR-106a-5p, hsa-miR-17-5p, hsa-miR-20a-5p, hsa-miR-301a-3p
RP11-498C9.3	STAT3	hsa-miR-106a-5p, hsa-miR-106b-5p, hsa-miR-130b-3p, hsa-miR-17-5p, hsa-miR-20a-5p, hsa-miR-20b-5p, hsa-miR-520c-3p
RP11-498C9.3	JAK1	hsa-miR-106b-5p, hsa-miR-17-5p, hsa-miR-373-3p
RP11-498C9.3	HIF1A	hsa-miR-106a-5p, hsa-miR-106b-5p, hsa-miR-17-5p, hsa-miR-199a-5p, hsa-miR-199b-5p, hsa-miR-20a-5p, hsa-miR-20b-5p
RP11-498C9.3	RUNX1	hsa-miR-106a-5p, hsa-miR-17-5p, hsa-miR-20a-5p, hsa-miR-378a-3p
RP11-498C9.3	MEF2D	hsa-miR-122-5p, hsa-miR-17-5p, hsa-miR-20a-5p
RP11-498C9.3	MBD2	hsa-miR-224-5p, hsa-miR-302a-3p, hsa-miR-373-3p
RP11-498C9.3	LDLR	hsa-miR-130b-3p, hsa-miR-17-5p, hsa-miR-199a-5p
RP11-498C9.3	CD44	hsa-miR-199a-5p, hsa-miR-373-3p, hsa-miR-520a-3p, hsa-miR-520c-3p
RP11-488L18.10	RB1	hsa-let-7a-5p, hsa-miR-26a-5p, hsa-miR-26b-5p
RP11-488C13.6	DNMT1	hsa-miR-148a-3p, hsa-miR-152-3p, hsa-miR-301b-3p
RP11-477D19.2	BECN1	hsa-miR-221-3p, hsa-miR-30b-5p, hsa-miR-30c-5p
RP11-473M20.16	LY75	hsa-miR-106b-5p, hsa-miR-17-5p, hsa-miR-20a-5p, hsa-miR-93-5p
RP11-473M20.16	CYLD	hsa-miR-10b-5p, hsa-miR-126-5p, hsa-miR-500a-5p
RP11-473M20.16	KAT2B	hsa-miR-106b-5p, hsa-miR-17-5p, hsa-miR-93-5p
RP11-473M20.16	STAT3	hsa-miR-106a-5p, hsa-miR-106b-5p, hsa-miR-125a-5p, hsa-miR-125b-5p, hsa-miR-17-5p, hsa-miR-20a-5p, hsa-miR-20b-5p
RP11-473M20.16	RBL2	hsa-miR-106a-5p, hsa-miR-106b-5p, hsa-miR-17-5p, hsa-miR-20a-5p
RP11-473M20.16	PURA	hsa-miR-106b-5p, hsa-miR-20a-5p, hsa-miR-93-5p
RP11-473M20.16	MCL1	hsa-miR-106a-5p, hsa-miR-125a-5p, hsa-miR-125b-5p, hsa-miR-139-5p, hsa-miR-20a-5p
RP11-473M20.16	JAK1	hsa-miR-106b-5p, hsa-miR-17-5p, hsa-miR-373-3p
RP11-473M20.16	RUNX1	hsa-miR-106a-5p, hsa-miR-17-5p, hsa-miR-20a-5p
RP11-473M20.16	ITGB8	hsa-miR-17-5p, hsa-miR-19b-1-5p, hsa-miR-20a-5p, hsa-miR-93-5p
RP11-473M20.16	CLIP1	hsa-miR-106b-5p, hsa-miR-17-5p, hsa-miR-20a-5p, hsa-miR-93-5p
RP11-46A10.5	DAZAP2	hsa-miR-106b-5p, hsa-miR-17-5p, hsa-miR-20a-5p, hsa-miR-93-5p
RP11-46A10.5	YOD1	hsa-miR-106b-5p, hsa-miR-17-5p, hsa-miR-20a-5p, hsa-miR-93-5p
RP11-46A10.5	MAP3K12	hsa-miR-130a-3p, hsa-miR-17-5p, hsa-miR-20a-5p
RP11-46A10.5	E2F3	hsa-miR-106b-5p, hsa-miR-17-5p, hsa-miR-20a-5p, hsa-miR-34c-5p, hsa-miR-497-5p
RP11-46A10.5	DICER1	hsa-miR-103a-3p, hsa-miR-107, hsa-miR-130a-3p, hsa-miR-130b-3p, hsa-miR-497-5p
RP11-46A10.5	CDC42	hsa-miR-107, hsa-miR-137, hsa-miR-185-5p, hsa-miR-224-5p
RP11-46A10.5	MYCN	hsa-miR-103a-3p, hsa-miR-34b-5p, hsa-miR-34c-5p, hsa-miR-449b-5p
RP11-46A10.5	MEF2D	hsa-miR-103a-3p, hsa-miR-122-5p, hsa-miR-17-5p, hsa-miR-20a-5p
RP11-46A10.5	GIT1	hsa-miR-149-5p, hsa-miR-34c-5p, hsa-miR-491-5p
RP11-46A10.5	FGFR1	hsa-miR-149-5p, hsa-miR-214-3p, hsa-miR-424-5p
RP11-452L6.1	IGF1R	hsa-miR-141-3p, hsa-miR-152-3p, hsa-miR-214-5p
RP11-44F21.5	HDAC1	hsa-miR-34a-5p, hsa-miR-449a, hsa-miR-449b-5p
RP11-44F21.5	NRAS	hsa-let-7a-5p, hsa-let-7b-5p, hsa-let-7c-5p, hsa-miR-98-5p
RP11-439E19.10	HIF1A	hsa-miR-106a-5p, hsa-miR-106b-5p, hsa-miR-17-5p, hsa-miR-20a-5p, hsa-miR-20b-5p
RP11-439E19.10	BCL2	hsa-miR-17-5p, hsa-miR-205-5p, hsa-miR-20a-5p, hsa-miR-30b-5p, hsa-miR-365a-3p
RP11-439E19.10	BACH1	hsa-miR-106b-5p, hsa-miR-17-5p, hsa-miR-20a-5p, hsa-miR-93-5p
RP11-439E19.10	PHLPP2	hsa-miR-205-5p, hsa-miR-20a-5p, hsa-miR-93-5p
RP11-439E19.10	APP	hsa-let-7a-5p, hsa-miR-106a-5p, hsa-miR-106b-5p, hsa-miR-17-5p, hsa-miR-20a-5p
RP11-421F16.3	BCL2	hsa-miR-139-5p, hsa-miR-141-3p, hsa-miR-153-3p, hsa-miR-33b-5p, hsa-miR-376c-3p, hsa-miR-448
RP11-414J4.2	WEE1	hsa-miR-15a-5p, hsa-miR-15b-5p, hsa-miR-16-5p, hsa-miR-195-5p, hsa-miR-424-5p, hsa-miR-497-5p
RP11-395G23.3	SOX6	hsa-miR-1269a, hsa-miR-132-3p, hsa-miR-1-3p
RP11-395G23.3	ESR1	hsa-miR-18a-5p, hsa-miR-18b-5p, hsa-miR-26a-5p, hsa-miR-335-3p
RP11-395G23.3	AR	hsa-miR-185-5p, hsa-miR-205-5p, hsa-miR-320a
RP11-386G11.10	SERPINH1	hsa-miR-29a-3p, hsa-miR-29b-3p, hsa-miR-29c-3p
RP11-386G11.10	GAPDH	hsa-miR-29a-3p, hsa-miR-29b-3p, hsa-miR-29c-3p
RP11-386G11.10	PIN1	hsa-miR-200b-3p, hsa-miR-200c-3p, hsa-miR-874-3p
RP11-386G11.10	NASP	hsa-miR-29a-3p, hsa-miR-29b-3p, hsa-miR-29c-3p
RP11-386G11.10	DNMT3B	hsa-miR-200b-3p, hsa-miR-200c-3p, hsa-miR-29a-3p, hsa-miR-29b-3p, hsa-miR-29c-3p
RP11-386G11.10	DNMT1	hsa-miR-200b-3p, hsa-miR-29a-3p, hsa-miR-29b-3p, hsa-miR-429
RP11-386G11.10	TDG	hsa-miR-29a-3p, hsa-miR-29b-3p, hsa-miR-29c-3p
RP11-384K6.6	VEGFA	hsa-miR-107, hsa-miR-15a-5p, hsa-miR-15b-5p, hsa-miR-16-5p
RP11-384K6.6	IGF1R	hsa-let-7e-5p, hsa-miR-16-5p, hsa-miR-214-5p, hsa-miR-486-5p, hsa-miR-497-5p
RP11-384K6.6	MYB	hsa-miR-103a-3p, hsa-miR-107, hsa-miR-15a-5p, hsa-miR-16-5p, hsa-miR-424-5p
RP11-362F19.1	JAK2	hsa-miR-125a-5p, hsa-miR-125b-5p, hsa-miR-375
RP11-359B12.2	VAC14	hsa-miR-200b-3p, hsa-miR-200c-3p, hsa-miR-429
RP11-359B12.2	ELMO2	hsa-miR-200b-3p, hsa-miR-200c-3p, hsa-miR-429
RP11-337C18.8	SMAD4	hsa-miR-19a-3p, hsa-miR-19b-3p, hsa-miR-34a-5p
RP11-335O4.3	LIMK1	hsa-miR-106a-5p, hsa-miR-17-5p, hsa-miR-20a-5p, hsa-miR-20b-5p
RP11-335O4.3	SOX4	hsa-miR-204-5p, hsa-miR-211-5p, hsa-miR-369-3p
RP11-335O4.3	SMAD7	hsa-miR-106b-5p, hsa-miR-20a-5p, hsa-miR-519d-3p, hsa-miR-93-5p
RP11-335O4.3	RAP1B	hsa-miR-181a-5p, hsa-miR-181b-5p, hsa-miR-181c-5p, hsa-miR-181d-5p
RP11-335O4.3	ZBTB4	hsa-miR-106b-5p, hsa-miR-17-5p, hsa-miR-93-5p
RP11-335O4.3	PELI1	hsa-miR-106b-5p, hsa-miR-17-5p, hsa-miR-20a-5p, hsa-miR-93-5p
RP11-335O4.3	CLIP1	hsa-miR-106b-5p, hsa-miR-17-5p, hsa-miR-20a-5p, hsa-miR-93-5p
RP11-334C17.5	ERBB4	hsa-miR-146a-5p, hsa-miR-146b-5p, hsa-miR-302b-3p, hsa-miR-302d-3p, hsa-miR-372-3p
RP11-334C17.5	STAT6	hsa-miR-10b-5p, hsa-miR-135a-5p, hsa-miR-135b-5p
RP11-334C17.5	LY75	hsa-miR-106b-5p, hsa-miR-146a-5p, hsa-miR-17-5p, hsa-miR-18a-5p, hsa-miR-20a-5p, hsa-miR-25-3p, hsa-miR-93-5p
RP11-334C17.5	TXNIP	hsa-miR-135a-5p, hsa-miR-138-5p, hsa-miR-373-3p
RP11-334C17.5	RBL2	hsa-miR-106a-5p, hsa-miR-106b-5p, hsa-miR-17-5p, hsa-miR-20a-5p
RP11-334C17.5	NANOG	hsa-miR-134-5p, hsa-miR-150-5p, hsa-miR-302a-3p, hsa-miR-34a-5p, hsa-miR-34c-5p
RP11-334C17.5	MAP3K12	hsa-miR-130a-3p, hsa-miR-17-5p, hsa-miR-20a-5p
RP11-334C17.5	JAK1	hsa-miR-106b-5p, hsa-miR-17-5p, hsa-miR-373-3p
RP11-334C17.5	CBL	hsa-miR-150-5p, hsa-miR-216a-5p, hsa-miR-98-5p
RP11-334C17.5	ARID4B	hsa-miR-106a-5p, hsa-miR-20b-5p, hsa-miR-92a-3p
RP11-334C17.5	APC	hsa-miR-106a-5p, hsa-miR-106b-5p, hsa-miR-135a-5p, hsa-miR-135b-5p
RP11-334C17.5	ADAR	hsa-miR-1-3p, hsa-miR-17-5p, hsa-miR-20a-5p
RP11-334C17.5	ZBTB4	hsa-miR-106b-5p, hsa-miR-130b-3p, hsa-miR-17-5p, hsa-miR-93-5p
RP11-334C17.5	MEF2D	hsa-miR-17-5p, hsa-miR-18a-5p, hsa-miR-20a-5p
RP11-334C17.5	GPS1	hsa-let-7c-5p, hsa-let-7f-5p, hsa-let-7i-5p
RP11-334C17.5	CSF1	hsa-miR-130a-3p, hsa-miR-130b-3p, hsa-miR-148b-3p, hsa-miR-152-3p
RP11-334C17.5	BCL6	hsa-miR-10a-5p, hsa-miR-127-3p, hsa-miR-339-5p, hsa-miR-346
RP11-333I13.1	DICER1	hsa-miR-103a-3p, hsa-miR-107, hsa-miR-195-5p, hsa-miR-497-5p
RP11-316M1.12	RHOC	hsa-miR-106b-5p, hsa-miR-372-3p, hsa-miR-93-5p
RP11-314C16.1	CCND2	hsa-let-7a-5p, hsa-let-7b-5p, hsa-miR-26a-5p, hsa-miR-340-5p
RP11-314C16.1	LIN28B	hsa-let-7a-5p, hsa-let-7b-5p, hsa-miR-26a-5p
RP11-314C16.1	PLAG1	hsa-miR-107, hsa-miR-181a-5p, hsa-miR-181b-5p, hsa-miR-26a-5p
RP11-314C16.1	HMGA2	hsa-let-7a-5p, hsa-let-7b-5p, hsa-let-7f-5p, hsa-let-7g-5p, hsa-miR-107, hsa-miR-26a-5p, hsa-miR-543
RP11-314C16.1	CDK6	hsa-let-7a-5p, hsa-let-7b-5p, hsa-miR-103a-3p, hsa-miR-107, hsa-miR-129-2-3p, hsa-miR-26a-5p, hsa-miR-26b-5p, hsa-miR-340-5p
RP11-314C16.1	SERPINB5	hsa-miR-103a-3p, hsa-miR-107, hsa-miR-7-5p
RP11-310P5.1	PIK3CG	hsa-miR-10a-5p, hsa-miR-125a-5p, hsa-miR-34a-5p
RP11-30K9.5	LY75	hsa-miR-106b-5p, hsa-miR-17-5p, hsa-miR-20a-5p, hsa-miR-93-5p
RP11-30K9.5	KAT2B	hsa-miR-106b-5p, hsa-miR-17-5p, hsa-miR-93-5p
RP11-30K9.5	STAT3	hsa-let-7c-5p, hsa-miR-106a-5p, hsa-miR-106b-5p, hsa-miR-130b-3p, hsa-miR-17-5p, hsa-miR-20a-5p, hsa-miR-20b-5p, hsa-miR-519d-3p
RP11-30K9.5	BAX	hsa-let-7b-5p, hsa-miR-122-5p, hsa-miR-34a-5p
RP11-30K9.5	MPL	hsa-let-7c-5p, hsa-let-7e-5p, hsa-let-7f-5p
RP11-30K9.5	MAP2K1	hsa-miR-34a-5p, hsa-miR-34c-5p, hsa-miR-449a, hsa-miR-494-3p
RP11-30K9.5	ITGB8	hsa-miR-17-5p, hsa-miR-20a-5p, hsa-miR-93-5p
RP11-307C12.11	MAP2K1	hsa-miR-34a-5p, hsa-miR-34c-5p, hsa-miR-449a
RP11-29G8.3	YAP1	hsa-miR-15a-5p, hsa-miR-16-5p, hsa-miR-195-5p
RP11-29G8.3	XIAP	hsa-miR-192-5p, hsa-miR-200b-3p, hsa-miR-200c-3p, hsa-miR-24-3p, hsa-miR-429
RP11-29G8.3	TGFBR2	hsa-miR-106a-5p, hsa-miR-17-5p, hsa-miR-18a-5p, hsa-miR-20a-5p, hsa-miR-93-5p, hsa-miR-9-5p
RP11-29G8.3	RND3	hsa-miR-106a-5p, hsa-miR-17-5p, hsa-miR-200b-3p, hsa-miR-200c-3p
RP11-29G8.3	DLC1	hsa-miR-200b-3p, hsa-miR-200c-3p, hsa-miR-429
RP11-29G8.3	CAV1	hsa-miR-103a-3p, hsa-miR-107, hsa-miR-192-5p
RP11-29G8.3	AKT3	hsa-miR-15a-5p, hsa-miR-15b-5p, hsa-miR-16-5p, hsa-miR-20b-5p, hsa-miR-519d-3p
RP11-29G8.3	YOD1	hsa-miR-106b-5p, hsa-miR-17-5p, hsa-miR-18a-5p, hsa-miR-20a-5p, hsa-miR-93-5p
RP11-29G8.3	WEE1	hsa-miR-106b-5p, hsa-miR-15a-5p, hsa-miR-15b-5p, hsa-miR-16-5p, hsa-miR-17-5p, hsa-miR-195-5p, hsa-miR-20a-5p, hsa-miR-497-5p
RP11-29G8.3	TIMP2	hsa-miR-106a-5p, hsa-miR-17-5p, hsa-miR-200c-3p, hsa-miR-20a-5p, hsa-miR-429, hsa-miR-519d-3p
RP11-29G8.3	TAB3	hsa-miR-15a-5p, hsa-miR-15b-5p, hsa-miR-16-5p, hsa-miR-195-5p, hsa-miR-497-5p
RP11-29G8.3	STAT3	hsa-miR-106a-5p, hsa-miR-106b-5p, hsa-miR-125a-5p, hsa-miR-125b-5p, hsa-miR-17-5p, hsa-miR-20a-5p, hsa-miR-20b-5p, hsa-miR-519d-3p
RP11-29G8.3	SOX5	hsa-miR-15a-5p, hsa-miR-16-5p, hsa-miR-194-5p
RP11-29G8.3	SMURF1	hsa-miR-15b-5p, hsa-miR-17-5p, hsa-miR-497-5p
RP11-29G8.3	SMAD4	hsa-miR-125a-5p, hsa-miR-125b-5p, hsa-miR-17-5p, hsa-miR-18a-5p, hsa-miR-20a-5p
RP11-29G8.3	SMAD2	hsa-miR-125a-5p, hsa-miR-15b-5p, hsa-miR-18a-5p, hsa-miR-18b-5p, hsa-miR-200b-3p
RP11-29G8.3	RPS6KB1	hsa-miR-16-5p, hsa-miR-195-5p, hsa-miR-200c-3p, hsa-miR-497-5p
RP11-29G8.3	ROCK2	hsa-miR-135a-5p, hsa-miR-200b-3p, hsa-miR-200c-3p
RP11-29G8.3	RBL2	hsa-miR-106a-5p, hsa-miR-106b-5p, hsa-miR-17-5p, hsa-miR-20a-5p
RP11-29G8.3	RBL1	hsa-miR-106b-5p, hsa-miR-17-5p, hsa-miR-20a-5p
RP11-29G8.3	PURA	hsa-miR-106b-5p, hsa-miR-15a-5p, hsa-miR-15b-5p, hsa-miR-16-5p, hsa-miR-20a-5p, hsa-miR-93-5p
RP11-29G8.3	MCL1	hsa-miR-106a-5p, hsa-miR-125a-5p, hsa-miR-125b-5p, hsa-miR-20a-5p
RP11-29G8.3	JAK1	hsa-miR-106b-5p, hsa-miR-107, hsa-miR-17-5p
RP11-29G8.3	IKBKB	hsa-miR-200b-3p, hsa-miR-200c-3p, hsa-miR-497-5p
RP11-29G8.3	HIF1A	hsa-miR-106a-5p, hsa-miR-106b-5p, hsa-miR-107, hsa-miR-17-5p, hsa-miR-18a-5p, hsa-miR-18b-5p, hsa-miR-20a-5p, hsa-miR-20b-5p, hsa-miR-429
RP11-29G8.3	FLT1	hsa-miR-200b-3p, hsa-miR-200c-3p, hsa-miR-24-3p
RP11-29G8.3	ETS1	hsa-miR-125b-5p, hsa-miR-200b-3p, hsa-miR-200c-3p, hsa-miR-9-5p
RP11-29G8.3	ERBB2IP	hsa-miR-200b-3p, hsa-miR-200c-3p, hsa-miR-429
RP11-29G8.3	DICER1	hsa-miR-103a-3p, hsa-miR-107, hsa-miR-18a-5p, hsa-miR-192-5p, hsa-miR-195-5p, hsa-miR-200c-3p, hsa-miR-497-5p, hsa-miR-9-5p
RP11-29G8.3	CRIM1	hsa-miR-15b-5p, hsa-miR-20a-5p, hsa-miR-20b-5p
RP11-29G8.3	CDK6	hsa-miR-103a-3p, hsa-miR-107, hsa-miR-16-5p, hsa-miR-195-5p, hsa-miR-377-3p, hsa-miR-497-5p
RP11-29G8.3	BMPR2	hsa-miR-135a-5p, hsa-miR-17-5p, hsa-miR-20a-5p
RP11-29G8.3	BACH1	hsa-miR-106b-5p, hsa-miR-17-5p, hsa-miR-18a-5p, hsa-miR-20a-5p, hsa-miR-93-5p
RP11-29G8.3	APC	hsa-miR-106a-5p, hsa-miR-106b-5p, hsa-miR-125b-5p, hsa-miR-135a-5p
RP11-29G8.3	SP1	hsa-miR-149-5p, hsa-miR-200b-3p, hsa-miR-200c-3p, hsa-miR-24-3p, hsa-miR-429
RP11-29G8.3	2018-09-07	hsa-miR-200b-3p, hsa-miR-200c-3p, hsa-miR-429
RP11-29G8.3	RUNX1	hsa-miR-106a-5p, hsa-miR-17-5p, hsa-miR-18a-5p, hsa-miR-20a-5p, hsa-miR-9-5p
RP11-29G8.3	RIN2	hsa-miR-200b-3p, hsa-miR-200c-3p, hsa-miR-429
RP11-29G8.3	RB1	hsa-miR-106a-5p, hsa-miR-106b-5p, hsa-miR-17-5p, hsa-miR-192-5p, hsa-miR-20a-5p
RP11-29G8.3	PHLPP1	hsa-miR-15a-5p, hsa-miR-17-5p, hsa-miR-18a-5p, hsa-miR-200b-3p
RP11-29G8.3	MEF2D	hsa-miR-103a-3p, hsa-miR-17-5p, hsa-miR-18a-5p, hsa-miR-20a-5p
RP11-29G8.3	KLHL20	hsa-miR-200b-3p, hsa-miR-200c-3p, hsa-miR-429
RP11-29G8.3	KDR	hsa-miR-15b-5p, hsa-miR-16-5p, hsa-miR-195-5p, hsa-miR-200b-3p, hsa-miR-200c-3p, hsa-miR-24-3p
RP11-29G8.3	ITGB8	hsa-miR-17-5p, hsa-miR-20a-5p, hsa-miR-93-5p
RP11-29G8.3	CLIP1	hsa-miR-106b-5p, hsa-miR-17-5p, hsa-miR-18a-5p, hsa-miR-20a-5p, hsa-miR-93-5p
RP11-29G8.3	APP	hsa-miR-106a-5p, hsa-miR-106b-5p, hsa-miR-15a-5p, hsa-miR-16-5p, hsa-miR-17-5p, hsa-miR-20a-5p
RP11-29G8.3	ACVR2B	hsa-miR-192-5p, hsa-miR-194-5p, hsa-miR-200c-3p
RP11-290F5.2	SLC2A4	hsa-miR-106b-5p, hsa-miR-223-3p, hsa-miR-93-5p
RP11-286B14.1	WNT1	hsa-let-7a-5p, hsa-miR-139-5p, hsa-miR-148b-3p
RP11-284N8.3	ZEB2	hsa-miR-200b-3p, hsa-miR-200c-3p, hsa-miR-429
RP11-284N8.3	ZEB1	hsa-miR-10b-5p, hsa-miR-142-5p, hsa-miR-200b-3p, hsa-miR-200c-3p, hsa-miR-23b-3p, hsa-miR-409-3p, hsa-miR-429
RP11-284N8.3	RASSF2	hsa-miR-200b-3p, hsa-miR-200c-3p, hsa-miR-429
RP11-284N8.3	FN1	hsa-let-7g-5p, hsa-miR-200b-3p, hsa-miR-200c-3p
RP11-284N8.3	MBNL1	hsa-miR-10b-5p, hsa-miR-30a-5p, hsa-miR-30b-5p, hsa-miR-30e-5p
RP11-284N8.3	ETS1	hsa-miR-200b-3p, hsa-miR-200c-3p, hsa-miR-23b-3p
RP11-284N8.3	PRDM1	hsa-let-7a-5p, hsa-let-7b-5p, hsa-let-7f-5p, hsa-miR-30a-5p
RP11-284N8.3	CASP3	hsa-let-7a-5p, hsa-let-7c-5p, hsa-let-7g-5p, hsa-miR-30c-5p, hsa-miR-30d-5p, hsa-miR-30e-5p, hsa-miR-98-5p
RP11-284N8.3	BMI1	hsa-let-7g-5p, hsa-miR-200b-3p, hsa-miR-200c-3p, hsa-miR-30e-5p
RP11-268P4.4	KRAS	hsa-let-7a-5p, hsa-let-7f-5p, hsa-let-7g-5p
RP11-268P4.4	HMGA2	hsa-let-7a-5p, hsa-let-7b-5p, hsa-let-7e-5p, hsa-let-7f-5p, hsa-let-7g-5p
RP11-265N6.1	RHOC	hsa-miR-106b-5p, hsa-miR-493-5p, hsa-miR-93-5p
RP11-264B17.3	IGF1R	hsa-let-7a-5p, hsa-let-7b-5p, hsa-let-7e-5p
RP11-264B17.3	HMGA2	hsa-let-7a-5p, hsa-let-7b-5p, hsa-let-7e-5p, hsa-let-7f-5p, hsa-let-7g-5p
RP11-263K19.4	IGF1R	hsa-let-7a-5p, hsa-let-7b-5p, hsa-let-7c-5p, hsa-let-7e-5p, hsa-miR-138-5p, hsa-miR-185-5p
RP11-263K19.4	HMGA2	hsa-let-7a-5p, hsa-let-7b-5p, hsa-let-7c-5p, hsa-let-7e-5p, hsa-let-7f-5p, hsa-let-7g-5p, hsa-miR-107, hsa-miR-98-5p
RP11-263K19.4	CDK6	hsa-let-7a-5p, hsa-let-7b-5p, hsa-miR-103a-3p, hsa-miR-107, hsa-miR-185-5p, hsa-miR-424-5p
RP11-253E3.3	CCND2	hsa-let-7a-5p, hsa-let-7b-5p, hsa-miR-154-5p, hsa-miR-98-5p
RP11-253E3.3	IGF2BP1	hsa-let-7a-5p, hsa-let-7b-5p, hsa-let-7g-5p
RP11-253E3.3	E2F2	hsa-let-7a-5p, hsa-let-7b-5p, hsa-miR-31-5p, hsa-miR-98-5p
RP11-253E3.3	KRAS	hsa-let-7a-5p, hsa-let-7f-5p, hsa-let-7g-5p
RP11-253E3.3	IGF1R	hsa-let-7a-5p, hsa-let-7b-5p, hsa-let-7c-5p, hsa-let-7e-5p, hsa-miR-4458
RP11-253E3.3	HMGA2	hsa-let-7a-5p, hsa-let-7b-5p, hsa-let-7c-5p, hsa-let-7d-5p, hsa-let-7e-5p, hsa-let-7f-5p, hsa-let-7g-5p, hsa-miR-154-5p, hsa-miR-98-5p
RP11-253E3.3	DICER1	hsa-let-7a-5p, hsa-let-7c-5p, hsa-let-7d-5p, hsa-miR-154-5p
RP11-250B2.3	MAPK14	hsa-miR-128-3p, hsa-miR-199a-3p, hsa-miR-27a-3p
RP11-248G5.8	CDK6	hsa-miR-214-5p, hsa-miR-34a-5p, hsa-miR-34c-5p
RP11-197N18.2	E2F6	hsa-miR-151a-5p, hsa-miR-193a-3p, hsa-miR-28-5p
RP11-179B15.5	BACE1	hsa-miR-107, hsa-miR-15a-5p, hsa-miR-16-5p
RP11-179B15.5	SMAD7	hsa-miR-15b-5p, hsa-miR-195-5p, hsa-miR-424-5p, hsa-miR-497-5p
RP11-179B15.5	WEE1	hsa-miR-15a-5p, hsa-miR-15b-5p, hsa-miR-16-5p, hsa-miR-195-5p, hsa-miR-424-5p, hsa-miR-497-5p
RP11-179B15.5	TAB3	hsa-miR-15a-5p, hsa-miR-15b-5p, hsa-miR-16-5p, hsa-miR-195-5p, hsa-miR-497-5p
RP11-179B15.5	RPS6KB1	hsa-miR-16-5p, hsa-miR-195-5p, hsa-miR-497-5p
RP11-179B15.5	RAF1	hsa-miR-16-5p, hsa-miR-195-5p, hsa-miR-497-5p
RP11-179B15.5	DICER1	hsa-miR-103a-3p, hsa-miR-107, hsa-miR-195-5p, hsa-miR-374a-5p, hsa-miR-497-5p
RP11-179B15.5	AXIN2	hsa-miR-107, hsa-miR-15b-5p, hsa-miR-16-5p
RP11-175O19.4	SMAD3	hsa-miR-140-5p, hsa-miR-142-5p, hsa-miR-155-5p, hsa-miR-23a-3p, hsa-miR-323a-3p, hsa-miR-491-5p, hsa-miR-708-5p
RP11-175O19.4	IL13	hsa-let-7d-5p, hsa-let-7f-5p, hsa-let-7g-5p, hsa-let-7i-5p
RP11-175O19.4	MAPK1	hsa-let-7a-5p, hsa-let-7b-5p, hsa-miR-17-5p, hsa-miR-181a-5p, hsa-miR-28-5p, hsa-miR-320a, hsa-miR-335-5p, hsa-miR-9-3p
RP11-175O19.4	IGF2BP1	hsa-let-7a-5p, hsa-let-7b-5p, hsa-let-7g-5p, hsa-miR-491-5p, hsa-miR-625-5p
RP11-175O19.4	YY1	hsa-miR-31-5p, hsa-miR-34a-5p, hsa-miR-34b-3p, hsa-miR-34c-5p
RP11-175O19.4	WNK1	hsa-miR-141-5p, hsa-miR-192-5p, hsa-miR-215-5p, hsa-miR-27a-3p
RP11-175O19.4	TGIF2	hsa-miR-148a-3p, hsa-miR-148a-5p, hsa-miR-30c-5p, hsa-miR-34a-5p, hsa-miR-34c-5p
RP11-175O19.4	NOTCH2	hsa-miR-107, hsa-miR-181c-5p, hsa-miR-23b-3p, hsa-miR-34a-5p, hsa-miR-9-3p
RP11-175O19.4	MBNL1	hsa-miR-30a-5p, hsa-miR-30b-5p, hsa-miR-30e-5p
RP11-175O19.4	MAP4K4	hsa-let-7a-5p, hsa-miR-302c-5p, hsa-miR-30d-5p, hsa-miR-31-5p
RP11-175O19.4	DICER1	hsa-let-7a-5p, hsa-let-7d-5p, hsa-miR-103a-3p, hsa-miR-107, hsa-miR-192-5p, hsa-miR-221-3p, hsa-miR-374a-5p, hsa-miR-3928-3p
RP11-175O19.4	BCL9	hsa-miR-30a-5p, hsa-miR-30b-5p, hsa-miR-30c-5p, hsa-miR-30d-5p
RP11-175O19.4	APAF1	hsa-miR-155-5p, hsa-miR-221-3p, hsa-miR-23a-3p, hsa-miR-23a-5p
RP11-175O19.4	ADAM10	hsa-miR-103a-3p, hsa-miR-122-5p, hsa-miR-448, hsa-miR-449a
RP11-175O19.4	YWHAZ	hsa-miR-155-5p, hsa-miR-22-5p, hsa-miR-27a-3p, hsa-miR-320a
RP11-175O19.4	PARP1	hsa-let-7a-5p, hsa-miR-216b-5p, hsa-miR-335-5p, hsa-miR-708-5p
RP11-175O19.4	NOVA1	hsa-miR-155-5p, hsa-miR-338-3p, hsa-miR-339-5p
RP11-175O19.4	LATS2	hsa-miR-107, hsa-miR-181b-5p, hsa-miR-181c-5p, hsa-miR-25-3p, hsa-miR-31-5p, hsa-miR-93-5p
RP11-175O19.4	GIT1	hsa-miR-125a-3p, hsa-miR-34c-5p, hsa-miR-491-5p
RP11-175O19.4	E2F6	hsa-let-7a-5p, hsa-miR-137, hsa-miR-151a-5p, hsa-miR-27a-3p, hsa-miR-28-5p
RP11-175O19.4	CREB1	hsa-miR-103a-3p, hsa-miR-1224-5p, hsa-miR-122-5p, hsa-miR-150-5p, hsa-miR-181b-5p, hsa-miR-27a-3p, hsa-miR-27b-3p, hsa-miR-34b-3p
RP11-173P15.3	PAK4	hsa-miR-199a-3p, hsa-miR-199b-3p, hsa-miR-22-3p
RP11-173P15.3	SCARB1	hsa-miR-143-3p, hsa-miR-185-5p, hsa-miR-96-5p
RP11-173P15.3	LIMK1	hsa-miR-106a-5p, hsa-miR-143-3p, hsa-miR-17-5p, hsa-miR-20a-5p, hsa-miR-20b-5p
RP11-173P15.3	FOXO1	hsa-miR-132-3p, hsa-miR-182-5p, hsa-miR-186-5p, hsa-miR-196a-5p, hsa-miR-21-5p, hsa-miR-96-5p
RP11-173P15.3	SRC	hsa-miR-205-5p, hsa-miR-31-5p, hsa-miR-34a-5p
RP11-173P15.3	SMAD7	hsa-miR-106b-5p, hsa-miR-185-5p, hsa-miR-20a-5p, hsa-miR-21-5p, hsa-miR-590-5p
RP11-173P15.3	PSMD9	hsa-miR-21-5p, hsa-miR-29b-3p, hsa-miR-34a-5p
RP11-173P15.3	PDCD4	hsa-miR-106a-5p, hsa-miR-182-5p, hsa-miR-208a-3p, hsa-miR-21-5p, hsa-miR-330-3p, hsa-miR-499a-5p
RP11-173P15.3	TRIM8	hsa-miR-106b-5p, hsa-miR-17-5p, hsa-miR-182-5p
RP11-173P15.3	MYCN	hsa-miR-29b-3p, hsa-miR-34a-5p, hsa-miR-34c-5p, hsa-miR-449a, hsa-miR-449b-5p
RP11-173P15.3	CDC25A	hsa-miR-21-5p, hsa-miR-34a-5p, hsa-miR-449a, hsa-miR-449b-5p
RP11-173P15.3	APP	hsa-miR-106a-5p, hsa-miR-106b-5p, hsa-miR-144-3p, hsa-miR-17-5p, hsa-miR-20a-5p
RP11-158K1.3	VHL	hsa-miR-101-3p, hsa-miR-155-5p, hsa-miR-23b-3p
RP11-148B6.1	VEGFA	hsa-miR-200c-3p, hsa-miR-23b-3p, hsa-miR-27b-3p
RP11-121C2.2	SMAD4	hsa-miR-125a-5p, hsa-miR-125b-5p, hsa-miR-1260b, hsa-miR-26a-5p
RP11-121C2.2	MCL1	hsa-miR-106a-5p, hsa-miR-125a-5p, hsa-miR-125b-5p, hsa-miR-26a-5p
RP11-119K6.6	MYCN	hsa-miR-34b-5p, hsa-miR-34c-5p, hsa-miR-449b-5p
RP11-119K6.6	CDK4	hsa-miR-34b-5p, hsa-miR-34c-5p, hsa-miR-449b-5p
RP11-119K6.6	CCNE2	hsa-miR-34b-5p, hsa-miR-34c-5p, hsa-miR-449b-5p
RP11-115D19.1	HMGA1	hsa-miR-15a-5p, hsa-miR-16-5p, hsa-miR-195-5p
RP11-115D19.1	FBXW7	hsa-miR-25-3p, hsa-miR-32-5p, hsa-miR-363-3p, hsa-miR-367-3p, hsa-miR-503-5p, hsa-miR-92a-3p
RP11-111K18.2	SIRT1	hsa-miR-181a-5p, hsa-miR-181b-5p, hsa-miR-181c-5p
RP11-111K18.2	BCL2	hsa-miR-181a-5p, hsa-miR-181b-5p, hsa-miR-181c-5p
RP11-111K18.2	PTEN	hsa-miR-181a-5p, hsa-miR-181b-5p, hsa-miR-181c-5p
RP11-111K18.2	CREB1	hsa-miR-181b-5p, hsa-miR-27a-3p, hsa-miR-27b-3p
RP11-1103G16.1	AURKB	hsa-let-7a-5p, hsa-let-7e-5p, hsa-let-7i-5p
RP11-1103G16.1	HMGA2	hsa-let-7a-5p, hsa-let-7b-5p, hsa-let-7c-5p, hsa-let-7d-5p, hsa-let-7e-5p, hsa-let-7f-5p, hsa-let-7g-5p, hsa-miR-98-5p
RP11-1100L3.8	EGR2	hsa-miR-150-5p, hsa-miR-17-5p, hsa-miR-20a-5p
RP11-1100L3.8	RHOC	hsa-miR-106b-5p, hsa-miR-302b-3p, hsa-miR-372-3p
RP11-1100L3.8	PER1	hsa-miR-29a-3p, hsa-miR-29b-3p, hsa-miR-29c-3p
RP11-106M3.3	CDKN1A	hsa-miR-10b-5p, hsa-miR-19a-3p, hsa-miR-19b-3p
RP11-106M3.2	CCND3	hsa-miR-15b-5p, hsa-miR-16-5p, hsa-miR-195-5p, hsa-miR-424-5p, hsa-miR-497-5p, hsa-miR-503-5p
RNF144A-AS1	CREB1	hsa-miR-27a-3p, hsa-miR-27b-3p, hsa-miR-9-5p
RMST	YAP1	hsa-miR-15a-5p, hsa-miR-16-5p, hsa-miR-195-5p, hsa-miR-27a-3p
RMST	CCND2	hsa-let-7a-5p, hsa-let-7b-5p, hsa-miR-15a-5p, hsa-miR-16-5p
RMST	MYC	hsa-let-7a-5p, hsa-let-7g-5p, hsa-miR-135a-5p, hsa-miR-212-3p, hsa-miR-33a-5p, hsa-miR-33b-5p
RMST	CDK6	hsa-let-7a-5p, hsa-let-7b-5p, hsa-miR-16-5p, hsa-miR-195-5p
RMST	CREB1	hsa-miR-27a-3p, hsa-miR-27b-3p, hsa-miR-33b-5p
RMST	APP	hsa-let-7a-5p, hsa-let-7d-5p, hsa-miR-15a-5p, hsa-miR-16-5p
RFPL1S	E2F2	hsa-let-7a-5p, hsa-let-7b-5p, hsa-miR-24-3p, hsa-miR-26a-5p
RFPL1S	CCNA2	hsa-let-7b-5p, hsa-miR-24-3p, hsa-miR-27b-3p
RFPL1S	AURKB	hsa-let-7a-5p, hsa-let-7e-5p, hsa-let-7i-5p, hsa-miR-24-3p
RFPL1S	KRAS	hsa-let-7a-5p, hsa-let-7f-5p, hsa-let-7g-5p, hsa-miR-1-3p, hsa-miR-143-3p, hsa-miR-181a-5p, hsa-miR-27a-3p
RASSF8-AS1	HOXA10	hsa-miR-135a-5p, hsa-miR-192-5p, hsa-miR-27a-3p, hsa-miR-544a
RASSF8-AS1	TWIST1	hsa-miR-106b-5p, hsa-miR-129-5p, hsa-miR-151a-3p, hsa-miR-33a-5p, hsa-miR-33b-5p
RASSF8-AS1	PURA	hsa-miR-106b-5p, hsa-miR-20a-5p, hsa-miR-93-5p
RASSF8-AS1	CLIC4	hsa-miR-106b-5p, hsa-miR-17-3p, hsa-miR-17-5p, hsa-miR-18a-5p, hsa-miR-20a-5p, hsa-miR-93-5p
RASSF8-AS1	RUNX1	hsa-miR-106a-5p, hsa-miR-17-5p, hsa-miR-18a-5p, hsa-miR-20a-5p, hsa-miR-215-5p, hsa-miR-27b-3p
RASSF8-AS1	RECK	hsa-miR-135b-5p, hsa-miR-182-5p, hsa-miR-183-5p, hsa-miR-96-5p
RASSF8-AS1	PHLPP2	hsa-miR-135a-5p, hsa-miR-205-5p, hsa-miR-20a-5p, hsa-miR-27a-3p, hsa-miR-93-5p
RAB30-AS1	E2F1	hsa-miR-135a-5p, hsa-miR-17-5p, hsa-miR-93-5p
PXN-AS1	AURKB	hsa-let-7a-5p, hsa-let-7e-5p, hsa-let-7i-5p
PWAR6	SPRED1	hsa-miR-126-5p, hsa-miR-132-3p, hsa-miR-1-3p
PWAR6	SOX6	hsa-miR-132-3p, hsa-miR-1-3p, hsa-miR-16-5p
PWAR6	SOX9	hsa-miR-101-3p, hsa-miR-1-3p, hsa-miR-145-5p
PWAR6	YOD1	hsa-miR-17-5p, hsa-miR-19a-3p, hsa-miR-19b-3p, hsa-miR-93-5p
PWAR6	TET2	hsa-miR-101-3p, hsa-miR-125b-5p, hsa-miR-26a-5p, hsa-miR-29b-3p, hsa-miR-7-5p
PWAR6	SIRT1	hsa-miR-124-3p, hsa-miR-132-3p, hsa-miR-221-3p, hsa-miR-34a-5p, hsa-miR-9-5p
PWAR6	ROCK2	hsa-miR-124-3p, hsa-miR-135a-5p, hsa-miR-139-5p
PWAR6	MDM2	hsa-miR-143-3p, hsa-miR-145-5p, hsa-miR-17-5p, hsa-miR-221-3p, hsa-miR-26a-5p
PWAR6	IRS2	hsa-miR-135a-5p, hsa-miR-145-5p, hsa-miR-33a-5p, hsa-miR-7-5p
PWAR6	IGF1R	hsa-miR-125b-5p, hsa-miR-139-5p, hsa-miR-143-3p, hsa-miR-145-5p, hsa-miR-16-5p, hsa-miR-185-5p, hsa-miR-7-5p
PWAR6	HMGA2	hsa-miR-125b-5p, hsa-miR-145-5p, hsa-miR-15a-5p, hsa-miR-16-5p, hsa-miR-26a-5p, hsa-miR-29b-3p, hsa-miR-33a-5p, hsa-miR-33b-5p
PWAR6	ELAVL1	hsa-miR-125a-5p, hsa-miR-29b-3p, hsa-miR-9-5p
PWAR6	CDK6	hsa-miR-124-3p, hsa-miR-145-5p, hsa-miR-16-5p, hsa-miR-185-5p, hsa-miR-195-5p, hsa-miR-218-5p, hsa-miR-26a-5p, hsa-miR-29b-3p, hsa-miR-34a-5p
PWAR6	BACH1	hsa-miR-17-5p, hsa-miR-19a-3p, hsa-miR-19b-3p, hsa-miR-93-5p
PWAR6	ROCK1	hsa-miR-124-3p, hsa-miR-135a-5p, hsa-miR-145-5p
PVT1	ZFPM2	hsa-miR-200b-3p, hsa-miR-200c-3p, hsa-miR-429
PVT1	NFIA	hsa-miR-107, hsa-miR-29a-3p, hsa-miR-424-5p
PVT1	PURA	hsa-miR-15a-5p, hsa-miR-15b-5p, hsa-miR-16-5p
PVT1	IKBKB	hsa-miR-148a-3p, hsa-miR-200b-3p, hsa-miR-200c-3p, hsa-miR-497-5p, hsa-miR-503-5p
PVT1	CCND3	hsa-miR-15b-5p, hsa-miR-16-5p, hsa-miR-195-5p, hsa-miR-424-5p, hsa-miR-497-5p, hsa-miR-503-5p
PTPRD-AS1	AKT3	hsa-miR-15a-5p, hsa-miR-15b-5p, hsa-miR-16-5p
PTPRD-AS1	RECK	hsa-miR-15a-5p, hsa-miR-15b-5p, hsa-miR-16-5p
PTPRD-AS1	KDR	hsa-miR-15b-5p, hsa-miR-16-5p, hsa-miR-195-5p
PSMG3-AS1	BDNF	hsa-miR-15a-5p, hsa-miR-16-5p, hsa-miR-339-5p
PSMG3-AS1	PURA	hsa-miR-15a-5p, hsa-miR-15b-5p, hsa-miR-16-5p
PSMD6-AS2	BCL2L11	hsa-miR-148a-3p, hsa-miR-301a-3p, hsa-miR-301b-3p
PSMD6-AS2	ROCK1	hsa-miR-130a-3p, hsa-miR-148a-3p, hsa-miR-148b-3p
PSMD6-AS2	CSF1	hsa-miR-130a-3p, hsa-miR-130b-3p, hsa-miR-148b-3p, hsa-miR-152-3p
PSMD5-AS1	CDH1	hsa-miR-132-3p, hsa-miR-204-5p, hsa-miR-34a-5p, hsa-miR-526b-3p, hsa-miR-9-3p, hsa-miR-9-5p
PSMD5-AS1	BCL2L2	hsa-miR-122-5p, hsa-miR-125b-5p, hsa-miR-195-5p, hsa-miR-204-5p
PSMD5-AS1	TAB3	hsa-miR-15a-5p, hsa-miR-15b-5p, hsa-miR-16-5p, hsa-miR-195-5p, hsa-miR-342-3p, hsa-miR-497-5p
PSMD5-AS1	RBL2	hsa-miR-106a-5p, hsa-miR-106b-5p, hsa-miR-17-5p, hsa-miR-20a-5p
PSMD5-AS1	RBL1	hsa-miR-106b-5p, hsa-miR-17-5p, hsa-miR-20a-5p
PSMD5-AS1	PURA	hsa-miR-106b-5p, hsa-miR-15a-5p, hsa-miR-15b-5p, hsa-miR-16-5p, hsa-miR-20a-5p, hsa-miR-93-5p
PSMD5-AS1	IKBKB	hsa-miR-132-3p, hsa-miR-148a-3p, hsa-miR-218-5p, hsa-miR-497-5p, hsa-miR-503-5p
PSMD5-AS1	HDAC4	hsa-miR-125a-5p, hsa-miR-140-5p, hsa-miR-9-5p
PSMD5-AS1	CRIM1	hsa-miR-15b-5p, hsa-miR-20a-5p, hsa-miR-20b-5p
PSMD5-AS1	TNF	hsa-miR-125b-5p, hsa-miR-143-3p, hsa-miR-17-5p
PSMD5-AS1	PPARA	hsa-miR-34a-5p, hsa-miR-519d-3p, hsa-miR-548d-5p, hsa-miR-9-3p, hsa-miR-9-5p
PSMD5-AS1	MEF2D	hsa-miR-103a-3p, hsa-miR-122-5p, hsa-miR-17-5p, hsa-miR-20a-5p
PRIM2	RBL1	hsa-miR-106b-5p, hsa-miR-17-5p, hsa-miR-20a-5p
PRIM2	E2F3	hsa-miR-106b-5p, hsa-miR-17-5p, hsa-miR-20a-5p
PRIM2	E2F1	hsa-miR-106a-5p, hsa-miR-106b-5p, hsa-miR-17-5p, hsa-miR-20a-5p, hsa-miR-519d-3p, hsa-miR-93-5p
PKI55	CUL5	hsa-miR-192-5p, hsa-miR-19a-3p, hsa-miR-19b-3p
PKI55	YAP1	hsa-miR-15a-5p, hsa-miR-16-5p, hsa-miR-195-5p, hsa-miR-27a-3p
PKI55	CCND2	hsa-let-7a-5p, hsa-let-7b-5p, hsa-miR-124-3p, hsa-miR-15a-5p, hsa-miR-16-5p, hsa-miR-26a-5p
PKI55	RAC1	hsa-miR-101-3p, hsa-miR-124-3p, hsa-miR-320a
PKI55	TMED7	hsa-let-7a-5p, hsa-miR-181b-5p, hsa-miR-24-3p
PKI55	SPRY2	hsa-miR-21-5p, hsa-miR-23a-3p, hsa-miR-27a-3p, hsa-miR-27b-3p
PKI55	SOX6	hsa-miR-132-3p, hsa-miR-1-3p, hsa-miR-16-5p
PKI55	PURA	hsa-miR-15a-5p, hsa-miR-15b-5p, hsa-miR-16-5p
PKI55	PDCD4	hsa-miR-181b-5p, hsa-miR-21-5p, hsa-miR-320a, hsa-miR-93-3p
PKI55	IGF1R	hsa-let-7a-5p, hsa-let-7b-5p, hsa-miR-125b-5p, hsa-miR-143-3p, hsa-miR-16-5p, hsa-miR-181b-5p, hsa-miR-185-5p, hsa-miR-21-5p, hsa-miR-320a
PKI55	HMGA2	hsa-let-7a-5p, hsa-let-7b-5p, hsa-let-7f-5p, hsa-let-7g-5p, hsa-miR-125b-5p, hsa-miR-15a-5p, hsa-miR-16-5p, hsa-miR-23b-3p, hsa-miR-26a-5p
PKI55	BMPR2	hsa-miR-19a-3p, hsa-miR-19b-3p, hsa-miR-21-5p
PKI55	ATM	hsa-miR-101-3p, hsa-miR-181b-5p, hsa-miR-26a-5p
PKI55	SMO	hsa-miR-125b-5p, hsa-miR-218-5p, hsa-miR-338-3p
PKI55	CTNNB1	hsa-miR-101-3p, hsa-miR-124-3p, hsa-miR-21-5p, hsa-miR-23b-3p, hsa-miR-320a
PKI55	CDH2	hsa-miR-124-3p, hsa-miR-218-5p, hsa-miR-338-3p
PITPNA-AS1	IGF2BP1	hsa-let-7a-5p, hsa-let-7b-5p, hsa-let-7g-5p
PITPNA-AS1	AURKB	hsa-let-7a-5p, hsa-let-7e-5p, hsa-let-7i-5p
PITPNA-AS1	HMGA2	hsa-let-7a-5p, hsa-let-7b-5p, hsa-let-7c-5p, hsa-let-7d-5p, hsa-let-7e-5p, hsa-let-7f-5p, hsa-let-7g-5p, hsa-miR-145-5p, hsa-miR-98-5p
PITPNA-AS1	PRMT5	hsa-miR-19a-3p, hsa-miR-25-3p, hsa-miR-32-5p, hsa-miR-92b-3p
PITPNA-AS1	GPS1	hsa-let-7c-5p, hsa-let-7f-5p, hsa-let-7i-5p
PITPNA-AS1	COPS8	hsa-let-7c-5p, hsa-let-7f-5p, hsa-let-7i-5p
PITPNA-AS1	COPS6	hsa-let-7c-5p, hsa-let-7f-5p, hsa-let-7i-5p
PINK1-AS	MFN2	hsa-miR-106a-5p, hsa-miR-106b-5p, hsa-miR-17-5p
PINK1-AS	ELAVL1	hsa-miR-519a-3p, hsa-miR-519b-3p, hsa-miR-519c-3p
PINK1-AS	APC	hsa-miR-106a-5p, hsa-miR-106b-5p, hsa-miR-135a-5p
PDXDC2P	CDH1	hsa-miR-129-5p, hsa-miR-421, hsa-miR-544a, hsa-miR-9-5p, hsa-miR-96-5p
PDXDC2P	COL4A1	hsa-miR-29a-3p, hsa-miR-29b-3p, hsa-miR-29c-3p
PDXDC2P	COL1A1	hsa-miR-129-5p, hsa-miR-29b-3p, hsa-miR-29c-3p
PDXDC2P	ITGB1	hsa-miR-124-3p, hsa-miR-29a-3p, hsa-miR-29b-3p, hsa-miR-29c-3p
PDXDC2P	DNMT3B	hsa-miR-124-3p, hsa-miR-29a-3p, hsa-miR-29b-3p, hsa-miR-29c-3p
PDXDC2P	COL4A2	hsa-miR-29a-3p, hsa-miR-29b-3p, hsa-miR-29c-3p
PCBP1-AS1	YOD1	hsa-miR-155-5p, hsa-miR-17-5p, hsa-miR-93-5p
PCBP1-AS1	TGIF2	hsa-miR-148a-5p, hsa-miR-29c-3p, hsa-miR-34c-5p
PCBP1-AS1	SIRT1	hsa-miR-181a-5p, hsa-miR-181b-5p, hsa-miR-181c-5p, hsa-miR-23b-3p, hsa-miR-29c-3p, hsa-miR-449b-5p
PCBP1-AS1	IGF1R	hsa-miR-122-5p, hsa-miR-125b-5p, hsa-miR-143-3p, hsa-miR-181b-5p, hsa-miR-185-5p, hsa-miR-494-3p
PCBP1-AS1	HK2	hsa-miR-125a-5p, hsa-miR-125b-5p, hsa-miR-143-3p, hsa-miR-181b-5p
PCBP1-AS1	HDAC4	hsa-miR-125a-5p, hsa-miR-29b-3p, hsa-miR-381-3p
PCBP1-AS1	GSK3B	hsa-miR-129-1-3p, hsa-miR-224-5p, hsa-miR-29a-3p, hsa-miR-29b-3p
PCBP1-AS1	ELAVL1	hsa-miR-125a-5p, hsa-miR-23c, hsa-miR-29b-3p
PCBP1-AS1	CDC42	hsa-miR-185-5p, hsa-miR-224-5p, hsa-miR-29a-3p, hsa-miR-29b-3p, hsa-miR-29c-3p
PCBP1-AS1	BCL9	hsa-miR-218-5p, hsa-miR-30a-5p, hsa-miR-30b-5p, hsa-miR-30d-5p
PCBP1-AS1	BACH1	hsa-miR-155-5p, hsa-miR-17-5p, hsa-miR-93-5p
PCBP1-AS1	TET1	hsa-miR-29a-3p, hsa-miR-29b-3p, hsa-miR-30a-5p
PCBP1-AS1	SMAD5	hsa-miR-135a-5p, hsa-miR-135b-5p, hsa-miR-155-5p, hsa-miR-23a-3p
PCBP1-AS1	MYCN	hsa-miR-29a-3p, hsa-miR-29b-3p, hsa-miR-29c-3p, hsa-miR-34c-5p, hsa-miR-449b-5p
PCBP1-AS1	MBNL2	hsa-miR-218-5p, hsa-miR-30a-5p, hsa-miR-30b-5p, hsa-miR-30e-5p
PCBP1-AS1	DNMT3A	hsa-miR-143-3p, hsa-miR-29a-3p, hsa-miR-29b-3p, hsa-miR-29c-3p
PAXBP1-AS1	SMAD7	hsa-miR-106b-5p, hsa-miR-20a-5p, hsa-miR-424-5p, hsa-miR-519d-3p, hsa-miR-93-5p
PART1	CCNG1	hsa-miR-23b-3p, hsa-miR-27b-3p, hsa-miR-9-5p
PART1	IGF1	hsa-miR-1-3p, hsa-miR-26a-5p, hsa-miR-27a-3p
PART1	MYC	hsa-miR-126-5p, hsa-miR-135a-5p, hsa-miR-17-5p, hsa-miR-185-5p, hsa-miR-24-3p, hsa-miR-26a-5p, hsa-miR-34a-5p, hsa-miR-377-3p
PART1	ESR1	hsa-miR-19a-3p, hsa-miR-19b-3p, hsa-miR-20b-5p, hsa-miR-26a-5p
PART1	SOX5	hsa-miR-132-3p, hsa-miR-15a-5p, hsa-miR-16-5p
PART1	PHB	hsa-miR-26a-5p, hsa-miR-27a-3p, hsa-miR-27b-3p
PART1	BIRC5	hsa-miR-16-5p, hsa-miR-195-5p, hsa-miR-34a-5p
OSER1-AS1	IGF1R	hsa-miR-143-3p, hsa-miR-181b-5p, hsa-miR-185-5p, hsa-miR-497-5p
OSER1-AS1	CDX2	hsa-miR-181a-5p, hsa-miR-181b-5p, hsa-miR-181c-5p
OIP5-AS1	TNFRSF10B	hsa-let-7a-5p, hsa-let-7b-5p, hsa-let-7c-5p, hsa-let-7d-5p, hsa-let-7e-5p, hsa-let-7g-5p
OIP5-AS1	SPRED1	hsa-miR-126-3p, hsa-miR-126-5p, hsa-miR-132-3p, hsa-miR-1-3p, hsa-miR-31-5p
OIP5-AS1	RAP1B	hsa-miR-100-5p, hsa-miR-139-5p, hsa-miR-181a-5p, hsa-miR-181b-5p, hsa-miR-181c-5p, hsa-miR-181d-5p, hsa-miR-28-5p
OIP5-AS1	RAD51	hsa-miR-103a-3p, hsa-miR-107, hsa-miR-155-5p, hsa-miR-193b-3p, hsa-miR-221-3p, hsa-miR-34a-5p
OIP5-AS1	RPS6KB1	hsa-miR-145-5p, hsa-miR-16-5p, hsa-miR-195-5p, hsa-miR-200c-3p, hsa-miR-218-5p, hsa-miR-382-5p, hsa-miR-497-5p
OIP5-AS1	MECP2	hsa-miR-124-3p, hsa-miR-130a-3p, hsa-miR-155-5p, hsa-miR-181c-5p, hsa-miR-19a-3p, hsa-miR-212-3p, hsa-miR-30a-3p, hsa-miR-340-5p, hsa-miR-432-5p
OIP5-AS1	JAK2	hsa-miR-125a-5p, hsa-miR-125b-5p, hsa-miR-135a-5p, hsa-miR-204-5p, hsa-miR-216a-5p, hsa-miR-375
OIP5-AS1	IRS2	hsa-let-7b-5p, hsa-miR-135a-5p, hsa-miR-145-5p, hsa-miR-338-3p, hsa-miR-33a-5p, hsa-miR-7-5p
NUTM2A-AS1	CCND1	hsa-let-7b-5p, hsa-let-7e-5p, hsa-let-7f-5p, hsa-miR-106a-5p, hsa-miR-106b-5p, hsa-miR-138-5p, hsa-miR-1-3p, hsa-miR-145-5p, hsa-miR-152-3p, hsa-miR-17-5p, hsa-miR-196a-5p, hsa-miR-19a-3p, hsa-miR-19b-1-5p, hsa-miR-200b-3p, hsa-miR-206, hsa-miR-20a-5p, hsa-miR-24-3p, hsa-miR-27a-3p, hsa-miR-34a-5p, hsa-miR-365a-3p, hsa-miR-374a-5p, hsa-miR-708-5p, hsa-miR-7-5p, hsa-miR-9-5p
NUTM2A-AS1	BAP1	hsa-miR-200b-3p, hsa-miR-200c-3p, hsa-miR-31-5p
NUTM2A-AS1	SOCS1	hsa-let-7i-5p, hsa-miR-122-5p, hsa-miR-19a-3p, hsa-miR-19b-3p
NUTM2A-AS1	WNT1	hsa-let-7a-5p, hsa-let-7e-5p, hsa-miR-122-5p, hsa-miR-148a-3p, hsa-miR-148b-3p, hsa-miR-152-3p, hsa-miR-200b-3p, hsa-miR-34a-5p
NUTM2A-AS1	MAPK7	hsa-miR-143-3p, hsa-miR-200b-3p, hsa-miR-24-3p
NUTM2A-AS1	FOXO3	hsa-miR-217, hsa-miR-222-3p, hsa-miR-31-5p, hsa-miR-93-5p, hsa-miR-9-5p
NUTM2A-AS1	FOSL1	hsa-miR-138-5p, hsa-miR-33a-5p, hsa-miR-34a-5p
NUTM2A-AS1	CEBPB	hsa-let-7c-5p, hsa-miR-34a-5p, hsa-miR-374a-5p
NR2F2-AS1	CHUK	hsa-miR-15a-5p, hsa-miR-15b-5p, hsa-miR-16-5p, hsa-miR-195-5p
NR2F2-AS1	HOXB5	hsa-miR-141-3p, hsa-miR-200a-3p, hsa-miR-429
NR2F2-AS1	ZFPM2	hsa-miR-141-3p, hsa-miR-200a-3p, hsa-miR-429
NR2F2-AS1	CCND2	hsa-miR-154-5p, hsa-miR-15a-5p, hsa-miR-16-5p, hsa-miR-302d-3p
NR2F2-AS1	CDKN1A	hsa-miR-15a-5p, hsa-miR-16-5p, hsa-miR-302a-3p, hsa-miR-372-3p, hsa-miR-503-5p, hsa-miR-93-5p
NR2F2-AS1	AKT3	hsa-miR-15a-5p, hsa-miR-15b-5p, hsa-miR-16-5p
NR2F2-AS1	SMAD7	hsa-miR-15b-5p, hsa-miR-195-5p, hsa-miR-424-5p, hsa-miR-497-5p, hsa-miR-93-5p
NR2F2-AS1	RUNX2	hsa-miR-195-5p, hsa-miR-320a, hsa-miR-376c-3p, hsa-miR-497-5p
NR2F2-AS1	RASSF2	hsa-miR-141-3p, hsa-miR-200a-3p, hsa-miR-429
NR2F2-AS1	FSCN1	hsa-miR-143-3p, hsa-miR-326, hsa-miR-429
NR2F2-AS1	TAB3	hsa-miR-15a-5p, hsa-miR-15b-5p, hsa-miR-16-5p, hsa-miR-195-5p, hsa-miR-497-5p
NR2F2-AS1	PDCD4	hsa-miR-200a-3p, hsa-miR-320a, hsa-miR-93-5p
NR2F2-AS1	IGF1R	hsa-miR-141-3p, hsa-miR-143-3p, hsa-miR-16-5p, hsa-miR-320a, hsa-miR-376c-3p, hsa-miR-448, hsa-miR-497-5p, hsa-miR-503-5p, hsa-miR-7-1-3p
NR2F2-AS1	HIF1A	hsa-miR-186-5p, hsa-miR-382-5p, hsa-miR-424-5p, hsa-miR-429
NR2F2-AS1	CDK6	hsa-miR-16-5p, hsa-miR-195-5p, hsa-miR-200a-3p, hsa-miR-320a, hsa-miR-424-5p, hsa-miR-497-5p
NR2F2-AS1	TCF7L1	hsa-miR-141-3p, hsa-miR-200a-3p, hsa-miR-429
NR2F2-AS1	RECK	hsa-miR-15a-5p, hsa-miR-15b-5p, hsa-miR-16-5p, hsa-miR-373-3p
NR2F2-AS1	RBFOX2	hsa-miR-320a, hsa-miR-320b, hsa-miR-320d
NR2F2-AS1	PTEN	hsa-miR-141-3p, hsa-miR-193a-3p, hsa-miR-200a-3p, hsa-miR-302a-3p, hsa-miR-320a, hsa-miR-382-5p, hsa-miR-429, hsa-miR-93-5p
NR2F2-AS1	LATS2	hsa-miR-372-3p, hsa-miR-373-3p, hsa-miR-93-5p
NR2F2-AS1	GNAI1	hsa-miR-320a, hsa-miR-320c, hsa-miR-320d
NR2F2-AS1	DLX5	hsa-miR-141-3p, hsa-miR-200a-3p, hsa-miR-320b
NR2F1-AS1	MET	hsa-miR-124-3p, hsa-miR-137, hsa-miR-139-5p, hsa-miR-181a-5p, hsa-miR-23b-3p
NR2F1-AS1	ITGB3	hsa-miR-124-3p, hsa-miR-192-5p, hsa-miR-320a
NR2F1-AS1	CTGF	hsa-miR-124-3p, hsa-miR-143-3p, hsa-miR-26a-5p
NR2F1-AS1	AKT3	hsa-miR-15a-5p, hsa-miR-15b-5p, hsa-miR-16-5p
NR2F1-AS1	VIM	hsa-miR-124-3p, hsa-miR-132-3p, hsa-miR-26a-5p, hsa-miR-320a
NR2F1-AS1	TWIST1	hsa-miR-181a-5p, hsa-miR-33a-5p, hsa-miR-33b-5p, hsa-miR-361-5p
NR2F1-AS1	SOX4	hsa-miR-132-3p, hsa-miR-212-3p, hsa-miR-369-3p
NR2F1-AS1	RUNX2	hsa-miR-195-5p, hsa-miR-218-5p, hsa-miR-23b-3p, hsa-miR-320a
NR2F1-AS1	MMP2	hsa-miR-124-3p, hsa-miR-125b-5p, hsa-miR-139-5p, hsa-miR-143-3p, hsa-miR-218-5p, hsa-miR-708-5p
NR2F1-AS1	FN1	hsa-miR-124-3p, hsa-miR-132-3p, hsa-miR-26a-5p
NR2F1-AS1	CXCL12	hsa-miR-126-5p, hsa-miR-137, hsa-miR-23a-3p
NR2F1-AS1	TET2	hsa-miR-125b-5p, hsa-miR-22-3p, hsa-miR-26a-5p
NR2F1-AS1	SIRT1	hsa-miR-124-3p, hsa-miR-132-3p, hsa-miR-181a-5p, hsa-miR-22-3p, hsa-miR-23b-3p
NR2F1-AS1	PURA	hsa-miR-15a-5p, hsa-miR-15b-5p, hsa-miR-16-5p
NR2F1-AS1	ITGB1	hsa-miR-124-3p, hsa-miR-143-3p, hsa-miR-192-5p
NR2F1-AS1	IGF1R	hsa-miR-125b-5p, hsa-miR-139-5p, hsa-miR-143-3p, hsa-miR-16-5p, hsa-miR-320a
NR2F1-AS1	HMGA2	hsa-miR-125b-5p, hsa-miR-15a-5p, hsa-miR-16-5p, hsa-miR-23b-3p, hsa-miR-26a-5p, hsa-miR-33a-5p, hsa-miR-33b-5p, hsa-miR-485-5p
NR2F1-AS1	HIF1A	hsa-miR-22-3p, hsa-miR-23b-3p, hsa-miR-33a-5p, hsa-miR-382-5p
NR2F1-AS1	CDK6	hsa-miR-124-3p, hsa-miR-137, hsa-miR-16-5p, hsa-miR-195-5p, hsa-miR-218-5p, hsa-miR-26a-5p, hsa-miR-320a
NR2F1-AS1	RECK	hsa-miR-15a-5p, hsa-miR-15b-5p, hsa-miR-16-5p
NR2F1-AS1	CTNNB1	hsa-miR-124-3p, hsa-miR-181a-5p, hsa-miR-23b-3p, hsa-miR-320a
NNT-AS1	CCNA2	hsa-let-7b-5p, hsa-miR-22-3p, hsa-miR-27b-3p
NNT-AS1	EZH2	hsa-let-7a-5p, hsa-let-7b-5p, hsa-miR-101-3p, hsa-miR-137, hsa-miR-144-3p, hsa-miR-185-5p, hsa-miR-214-3p, hsa-miR-320c
NNT-AS1	E2F1	hsa-let-7a-5p, hsa-miR-106a-5p, hsa-miR-181b-5p, hsa-miR-21-5p, hsa-miR-342-3p, hsa-miR-9-3p
NNT-AS1	DNMT1	hsa-miR-140-5p, hsa-miR-185-5p, hsa-miR-30b-5p, hsa-miR-30c-5p, hsa-miR-342-3p
NNT-AS1	NRAS	hsa-let-7a-5p, hsa-let-7b-5p, hsa-miR-181a-5p, hsa-miR-214-3p
NKAPP1	RBL1	hsa-miR-106b-5p, hsa-miR-17-5p, hsa-miR-20a-5p
NEAT1	TGFBR2	hsa-miR-106a-5p, hsa-miR-130a-3p, hsa-miR-142-5p, hsa-miR-145-5p, hsa-miR-17-5p, hsa-miR-181c-5p, hsa-miR-18a-5p, hsa-miR-196a-5p, hsa-miR-196b-5p, hsa-miR-19a-3p, hsa-miR-19b-3p, hsa-miR-202-5p, hsa-miR-204-5p, hsa-miR-20a-5p, hsa-miR-211-5p, hsa-miR-21-5p, hsa-miR-23b-5p, hsa-miR-27a-3p, hsa-miR-302b-3p, hsa-miR-302d-3p, hsa-miR-34b-5p, hsa-miR-370-3p, hsa-miR-372-3p, hsa-miR-373-3p, hsa-miR-52…
NEAT1	ITGB3	hsa-let-7a-5p, hsa-let-7c-5p, hsa-miR-124-3p, hsa-miR-17-3p, hsa-miR-192-5p, hsa-miR-30a-5p, hsa-miR-320a, hsa-miR-338-3p, hsa-miR-98-5p
NEAT1	GRB2	hsa-miR-200a-3p, hsa-miR-27a-3p, hsa-miR-329-3p, hsa-miR-376c-3p, hsa-miR-378a-3p, hsa-miR-411-5p, hsa-miR-433-3p, hsa-miR-96-3p
NEAT1	EGFR	hsa-let-7a-5p, hsa-miR-122-5p, hsa-miR-125a-5p, hsa-miR-125b-5p, hsa-miR-128-3p, hsa-miR-132-3p, hsa-miR-133b, hsa-miR-135a-5p, hsa-miR-137, hsa-miR-145-5p, hsa-miR-146a-5p, hsa-miR-146b-5p, hsa-miR-200a-3p, hsa-miR-21-5p, hsa-miR-218-5p, hsa-miR-219a-5p, hsa-miR-27a-3p, hsa-miR-27a-5p, hsa-miR-27b-3p, hsa-miR-302b-3p, hsa-miR-491-5p, hsa-miR-520b, hsa-miR-520e, hsa-miR-542-5p, hsa-miR-574-3p, hs…
NEAT1	CYLD	hsa-miR-10b-5p, hsa-miR-126-5p, hsa-miR-130b-3p, hsa-miR-181b-5p, hsa-miR-182-5p, hsa-miR-362-5p, hsa-miR-500a-5p, hsa-miR-922
NEAT1	ZEB1	hsa-miR-101-3p, hsa-miR-10b-5p, hsa-miR-130b-3p, hsa-miR-141-3p, hsa-miR-142-5p, hsa-miR-144-3p, hsa-miR-150-5p, hsa-miR-183-5p, hsa-miR-200a-3p, hsa-miR-200b-3p, hsa-miR-200c-3p, hsa-miR-205-5p, hsa-miR-223-3p, hsa-miR-23b-3p, hsa-miR-33b-5p, hsa-miR-409-3p, hsa-miR-429, hsa-miR-455-3p, hsa-miR-484, hsa-miR-494-3p, hsa-miR-539-5p, hsa-miR-590-3p, hsa-miR-652-3p, hsa-miR-655-3p, hsa-miR-96-5p
NEAT1	SERPINE1	hsa-miR-10a-5p, hsa-miR-143-3p, hsa-miR-145-5p, hsa-miR-148a-3p, hsa-miR-192-5p, hsa-miR-301a-3p, hsa-miR-30b-5p, hsa-miR-30c-5p, hsa-miR-99a-5p
NEAT1	RUNX2	hsa-miR-103a-3p, hsa-miR-135a-5p, hsa-miR-155-5p, hsa-miR-195-5p, hsa-miR-204-5p, hsa-miR-205-5p, hsa-miR-218-5p, hsa-miR-221-5p, hsa-miR-222-3p, hsa-miR-23b-3p, hsa-miR-29b-3p, hsa-miR-30a-3p, hsa-miR-30a-5p, hsa-miR-30b-5p, hsa-miR-30c-5p, hsa-miR-30d-5p, hsa-miR-320a, hsa-miR-335-5p, hsa-miR-34c-5p, hsa-miR-376c-3p, hsa-miR-433-3p, hsa-miR-497-5p, hsa-miR-628-3p
NEAT1	MYC	hsa-let-7a-5p, hsa-let-7c-5p, hsa-let-7g-5p, hsa-miR-122-5p, hsa-miR-125a-3p, hsa-miR-126-5p, hsa-miR-129-2-3p, hsa-miR-130a-3p, hsa-miR-135a-5p, hsa-miR-135b-5p, hsa-miR-145-5p, hsa-miR-155-5p, hsa-miR-17-5p, hsa-miR-184, hsa-miR-185-5p, hsa-miR-20a-5p, hsa-miR-212-3p, hsa-miR-21-5p, hsa-miR-24-3p, hsa-miR-25-5p, hsa-miR-26a-5p, hsa-miR-26b-5p, hsa-miR-29a-3p, hsa-miR-29b-3p, hsa-miR-320a, hsa-m…
NEAT1	MAFB	hsa-miR-130a-3p, hsa-miR-135b-5p, hsa-miR-148a-3p, hsa-miR-152-3p, hsa-miR-155-5p, hsa-miR-199a-5p, hsa-miR-223-3p, hsa-miR-24-3p, hsa-miR-425-5p
NEAT1	VEGFA	hsa-miR-101-3p, hsa-miR-101-5p, hsa-miR-106a-5p, hsa-miR-106b-5p, hsa-miR-107, hsa-miR-125a-3p, hsa-miR-125a-5p, hsa-miR-126-3p, hsa-miR-126-5p, hsa-miR-134-5p, hsa-miR-1-3p, hsa-miR-140-5p, hsa-miR-141-3p, hsa-miR-145-5p, hsa-miR-146a-5p, hsa-miR-147a, hsa-miR-150-5p, hsa-miR-15a-5p, hsa-miR-15b-5p, hsa-miR-16-1-3p, hsa-miR-16-5p, hsa-miR-17-5p, hsa-miR-181a-5p, hsa-miR-185-5p, hsa-miR-186-5p, h…
NEAT1	TIMP2	hsa-miR-106a-5p, hsa-miR-17-5p, hsa-miR-200c-3p, hsa-miR-20a-5p, hsa-miR-301a-3p, hsa-miR-429, hsa-miR-519a-3p, hsa-miR-519c-3p, hsa-miR-519d-3p
NEAT1	TIAM1	hsa-miR-10b-5p, hsa-miR-141-3p, hsa-miR-182-5p, hsa-miR-21-5p, hsa-miR-22-3p, hsa-miR-29c-3p, hsa-miR-31-5p, hsa-miR-329-3p
NEAT1	STAT3	hsa-let-7a-5p, hsa-let-7c-5p, hsa-miR-106a-5p, hsa-miR-106b-5p, hsa-miR-124-3p, hsa-miR-124-5p, hsa-miR-125a-5p, hsa-miR-125b-5p, hsa-miR-130b-3p, hsa-miR-148a-3p, hsa-miR-17-5p, hsa-miR-181a-5p, hsa-miR-20a-5p, hsa-miR-20b-5p, hsa-miR-21-3p, hsa-miR-21-5p, hsa-miR-223-3p, hsa-miR-23a-3p, hsa-miR-29b-1-5p, hsa-miR-29b-3p, hsa-miR-340-5p, hsa-miR-375, hsa-miR-519a-3p, hsa-miR-519d-3p, hsa-miR-520c…
NEAT1	SMAD2	hsa-let-7g-5p, hsa-miR-125a-5p, hsa-miR-128-3p, hsa-miR-132-3p, hsa-miR-145-5p, hsa-miR-146a-5p, hsa-miR-148a-3p, hsa-miR-155-5p, hsa-miR-15b-5p, hsa-miR-18a-5p, hsa-miR-18b-5p, hsa-miR-200a-3p, hsa-miR-200b-3p, hsa-miR-205-5p, hsa-miR-206, hsa-miR-212-3p, hsa-miR-27a-3p, hsa-miR-27b-3p, hsa-miR-323a-3p, hsa-miR-425-5p, hsa-miR-484, hsa-miR-486-5p
NEAT1	RPS6KB1	hsa-miR-122-5p, hsa-miR-145-5p, hsa-miR-16-5p, hsa-miR-195-5p, hsa-miR-200c-3p, hsa-miR-218-5p, hsa-miR-382-5p, hsa-miR-497-5p
NEAT1	ROCK2	hsa-miR-124-3p, hsa-miR-135a-5p, hsa-miR-138-5p, hsa-miR-139-5p, hsa-miR-142-3p, hsa-miR-144-5p, hsa-miR-200b-3p, hsa-miR-200c-3p
NEAT1	RAF1	hsa-miR-125a-5p, hsa-miR-125b-5p, hsa-miR-132-3p, hsa-miR-139-5p, hsa-miR-16-5p, hsa-miR-195-5p, hsa-miR-497-5p, hsa-miR-7-1-3p, hsa-miR-7-5p
NEAT1	MCL1	hsa-miR-101-3p, hsa-miR-106a-5p, hsa-miR-125a-5p, hsa-miR-125b-5p, hsa-miR-133b, hsa-miR-139-5p, hsa-miR-148b-5p, hsa-miR-153-3p, hsa-miR-181a-5p, hsa-miR-181b-5p, hsa-miR-193a-3p, hsa-miR-193b-3p, hsa-miR-20a-5p, hsa-miR-26a-5p, hsa-miR-29a-3p, hsa-miR-29b-3p, hsa-miR-29c-3p, hsa-miR-302b-3p, hsa-miR-30c-5p, hsa-miR-320a, hsa-miR-339-3p, hsa-miR-512-5p, hsa-miR-518a-5p, hsa-miR-582-5p, hsa-miR-8…
NEAT1	GSK3B	hsa-miR-1246, hsa-miR-129-1-3p, hsa-miR-182-5p, hsa-miR-183-5p, hsa-miR-199a-5p, hsa-miR-224-5p, hsa-miR-26a-1-3p, hsa-miR-26a-5p, hsa-miR-27a-3p, hsa-miR-29a-3p, hsa-miR-29a-5p, hsa-miR-29b-3p, hsa-miR-346, hsa-miR-501-5p, hsa-miR-616-5p, hsa-miR-744-5p, hsa-miR-769-5p, hsa-miR-9-5p, hsa-miR-96-5p, hsa-miR-99b-3p
NEAT1	ETS1	hsa-miR-124-3p, hsa-miR-125b-5p, hsa-miR-126-3p, hsa-miR-126-5p, hsa-miR-1-3p, hsa-miR-144-3p, hsa-miR-145-5p, hsa-miR-155-5p, hsa-miR-193b-3p, hsa-miR-199a-5p, hsa-miR-200b-3p, hsa-miR-200c-3p, hsa-miR-208a-3p, hsa-miR-221-3p, hsa-miR-222-3p, hsa-miR-23b-3p, hsa-miR-31-5p, hsa-miR-324-5p, hsa-miR-499a-5p, hsa-miR-506-3p, hsa-miR-9-5p
NEAT1	TLR2	hsa-miR-101-5p, hsa-miR-105-5p, hsa-miR-143-3p, hsa-miR-146a-5p, hsa-miR-154-5p, hsa-miR-19a-3p, hsa-miR-19b-3p, hsa-miR-23a-5p
NEAT1	SP1	hsa-miR-129-5p, hsa-miR-133b, hsa-miR-137, hsa-miR-1-3p, hsa-miR-145-5p, hsa-miR-149-5p, hsa-miR-150-5p, hsa-miR-200b-3p, hsa-miR-200c-3p, hsa-miR-21-5p, hsa-miR-218-5p, hsa-miR-223-3p, hsa-miR-22-3p, hsa-miR-24-3p, hsa-miR-27a-3p, hsa-miR-29b-3p, hsa-miR-29c-3p, hsa-miR-324-5p, hsa-miR-326, hsa-miR-330-3p, hsa-miR-335-5p, hsa-miR-33a-5p, hsa-miR-375, hsa-miR-429, hsa-miR-612
NBPF1	TAB3	hsa-miR-15a-5p, hsa-miR-15b-5p, hsa-miR-16-5p, hsa-miR-195-5p, hsa-miR-497-5p
NBPF1	SMAD2	hsa-miR-128-3p, hsa-miR-148a-3p, hsa-miR-155-5p, hsa-miR-15b-5p, hsa-miR-205-5p, hsa-miR-27a-3p, hsa-miR-27b-3p
NBPF1	RPS6KB1	hsa-miR-16-5p, hsa-miR-195-5p, hsa-miR-497-5p
NBPF1	RAF1	hsa-miR-16-5p, hsa-miR-195-5p, hsa-miR-497-5p
NBPF1	HIF1A	hsa-miR-155-5p, hsa-miR-186-5p, hsa-miR-22-3p, hsa-miR-27a-3p, hsa-miR-424-5p
NBPF1	CDK6	hsa-miR-16-5p, hsa-miR-195-5p, hsa-miR-214-5p, hsa-miR-320a, hsa-miR-377-3p, hsa-miR-424-5p, hsa-miR-497-5p
NBPF1	APC	hsa-miR-135a-5p, hsa-miR-135b-5p, hsa-miR-155-5p, hsa-miR-27a-3p
NBPF1	SMAD5	hsa-miR-135a-5p, hsa-miR-135b-5p, hsa-miR-155-5p, hsa-miR-27a-3p
NBPF1	ROCK1	hsa-miR-135a-5p, hsa-miR-148a-3p, hsa-miR-148b-3p, hsa-miR-335-5p
NBPF1	RBFOX2	hsa-miR-22-3p, hsa-miR-320a, hsa-miR-320b, hsa-miR-320d
NBPF1	PHLPP2	hsa-miR-135a-5p, hsa-miR-205-5p, hsa-miR-27a-3p
NBPF1	GNAI1	hsa-miR-320a, hsa-miR-320c, hsa-miR-320d
NBPF1	BMI1	hsa-miR-128-3p, hsa-miR-15a-5p, hsa-miR-16-5p, hsa-miR-320a, hsa-miR-708-5p
MORF4L2-AS1	ABCA1	hsa-miR-19b-3p, hsa-miR-26a-5p, hsa-miR-26b-5p
MMP24-AS1	RAC1	hsa-miR-124-3p, hsa-miR-146a-5p, hsa-miR-224-5p
MIR99AHG	EZH2	hsa-let-7a-5p, hsa-let-7b-5p, hsa-let-7e-5p, hsa-miR-137
MIR99AHG	CREB1	hsa-miR-204-5p, hsa-miR-27a-3p, hsa-miR-27b-3p, hsa-miR-582-5p
MIR99AHG	APP	hsa-let-7a-5p, hsa-let-7d-5p, hsa-miR-106b-5p, hsa-miR-20a-5p
MIR663AHG	FGB	hsa-miR-29a-3p, hsa-miR-29b-3p, hsa-miR-29c-3p, hsa-miR-409-3p
MIR503HG	ITPR1	hsa-miR-204-5p, hsa-miR-211-5p, hsa-miR-494-3p
MIR22HG	MAPK9	hsa-miR-106a-5p, hsa-miR-106b-5p, hsa-miR-17-5p, hsa-miR-20a-5p
MIR22HG	EPAS1	hsa-miR-17-5p, hsa-miR-185-5p, hsa-miR-20a-5p, hsa-miR-424-5p
MIR22HG	SDC1	hsa-miR-10b-5p, hsa-miR-143-3p, hsa-miR-302a-3p
MIR22HG	RUNX2	hsa-miR-195-5p, hsa-miR-205-5p, hsa-miR-218-5p, hsa-miR-23b-3p, hsa-miR-30a-3p, hsa-miR-320a, hsa-miR-376c-3p, hsa-miR-497-5p
MIR22HG	PLAU	hsa-miR-143-3p, hsa-miR-193a-3p, hsa-miR-193b-3p, hsa-miR-23b-3p
MIR22HG	NOD2	hsa-miR-10a-5p, hsa-miR-320a, hsa-miR-320b, hsa-miR-320c
MIR22HG	MMP2	hsa-miR-106b-5p, hsa-miR-143-3p, hsa-miR-17-5p, hsa-miR-218-5p, hsa-miR-377-3p, hsa-miR-519d-3p, hsa-miR-524-5p, hsa-miR-708-5p
MIR22HG	MMP14	hsa-miR-10a-5p, hsa-miR-143-3p, hsa-miR-193a-3p, hsa-miR-22-3p
MIR22HG	XBP1	hsa-miR-125a-3p, hsa-miR-30a-3p, hsa-miR-320c
MIR22HG	TIMP2	hsa-miR-106a-5p, hsa-miR-17-5p, hsa-miR-20a-5p, hsa-miR-519d-3p
MIR22HG	TCEAL1	hsa-miR-106b-5p, hsa-miR-17-5p, hsa-miR-20a-5p, hsa-miR-22-3p, hsa-miR-25-3p, hsa-miR-370-3p
MIR22HG	STAT3	hsa-miR-106a-5p, hsa-miR-106b-5p, hsa-miR-17-5p, hsa-miR-20a-5p, hsa-miR-23a-3p, hsa-miR-340-5p, hsa-miR-519d-3p, hsa-miR-520c-3p
MIR22HG	RPS6KB1	hsa-miR-16-5p, hsa-miR-195-5p, hsa-miR-218-5p, hsa-miR-497-5p
MIR22HG	BACH1	hsa-miR-106b-5p, hsa-miR-17-5p, hsa-miR-196a-5p, hsa-miR-20a-5p, hsa-miR-25-3p
MIR22HG	ACTB	hsa-miR-15a-5p, hsa-miR-15b-5p, hsa-miR-16-5p, hsa-miR-28-5p, hsa-miR-497-5p
MIR22HG	SIRPA	hsa-miR-106a-5p, hsa-miR-17-5p, hsa-miR-20a-5p
MIR22HG	RB1	hsa-miR-106a-5p, hsa-miR-106b-5p, hsa-miR-132-3p, hsa-miR-17-5p, hsa-miR-20a-5p, hsa-miR-212-3p
MIR22HG	MMP9	hsa-let-7e-5p, hsa-miR-132-3p, hsa-miR-143-3p, hsa-miR-15b-5p, hsa-miR-218-5p, hsa-miR-377-3p, hsa-miR-497-5p, hsa-miR-524-5p
MIR22HG	FAS	hsa-miR-106a-5p, hsa-miR-196b-5p, hsa-miR-23a-3p, hsa-miR-320a
MIR22HG	CD44	hsa-miR-143-3p, hsa-miR-199a-5p, hsa-miR-373-3p, hsa-miR-520a-3p, hsa-miR-520c-3p, hsa-miR-708-5p
MIR181A2HG	LEFTY2	hsa-miR-302a-3p, hsa-miR-302d-3p, hsa-miR-373-3p
MIR181A2HG	E2F3	hsa-miR-106b-5p, hsa-miR-17-5p, hsa-miR-20a-5p
MIR181A2HG	BACH1	hsa-miR-106b-5p, hsa-miR-17-5p, hsa-miR-18a-5p, hsa-miR-196a-5p, hsa-miR-20a-5p, hsa-miR-93-5p
MIR181A2HG	LATS2	hsa-miR-372-3p, hsa-miR-373-3p, hsa-miR-93-5p
MIR181A2HG	CDK2	hsa-miR-17-5p, hsa-miR-20a-5p, hsa-miR-302a-3p, hsa-miR-302b-3p, hsa-miR-302d-3p, hsa-miR-372-3p
MIR181A2HG	APP	hsa-miR-106a-5p, hsa-miR-106b-5p, hsa-miR-17-5p, hsa-miR-20a-5p, hsa-miR-520c-3p
MIR181A1HG	JAG1	hsa-miR-21-5p, hsa-miR-26a-5p, hsa-miR-410-3p
MIR181A1HG	VIM	hsa-miR-129-5p, hsa-miR-26a-5p, hsa-miR-320a
MIR181A1HG	CDK6	hsa-miR-103a-3p, hsa-miR-107, hsa-miR-129-5p, hsa-miR-26a-5p, hsa-miR-320a
MIR181A1HG	RBFOX2	hsa-miR-320a, hsa-miR-320b, hsa-miR-320d
MIR17HG	YAP1	hsa-miR-141-3p, hsa-miR-16-5p, hsa-miR-199a-3p, hsa-miR-200a-3p, hsa-miR-375
MIR17HG	HMGB1	hsa-miR-153-3p, hsa-miR-181b-5p, hsa-miR-200a-3p, hsa-miR-205-5p, hsa-miR-22-3p, hsa-miR-320a, hsa-miR-34a-5p
MIR17HG	MAP3K1	hsa-miR-302a-3p, hsa-miR-302b-3p, hsa-miR-302d-3p
MIR17HG	NR4A2	hsa-miR-19a-3p, hsa-miR-217, hsa-miR-302d-3p, hsa-miR-34a-5p, hsa-miR-372-3p
MIR17HG	CCNB1	hsa-miR-130a-3p, hsa-miR-132-3p, hsa-miR-212-3p, hsa-miR-410-3p
MIR17HG	YY1	hsa-miR-205-5p, hsa-miR-34a-5p, hsa-miR-34c-5p
MIR17HG	YOD1	hsa-miR-106b-5p, hsa-miR-155-5p, hsa-miR-17-5p, hsa-miR-18a-5p, hsa-miR-19a-3p, hsa-miR-19b-3p, hsa-miR-20a-5p, hsa-miR-25-3p, hsa-miR-93-5p
MIR17HG	WEE1	hsa-miR-106b-5p, hsa-miR-155-5p, hsa-miR-16-5p, hsa-miR-17-5p, hsa-miR-20a-5p, hsa-miR-221-3p, hsa-miR-372-3p
MIR17HG	TJP1	hsa-miR-212-3p, hsa-miR-34a-5p, hsa-miR-34c-5p
MIR17HG	TGIF2	hsa-miR-148a-3p, hsa-miR-30c-5p, hsa-miR-34a-3p, hsa-miR-34a-5p, hsa-miR-34c-5p
MIR17HG	RBL1	hsa-miR-106b-5p, hsa-miR-17-5p, hsa-miR-20a-5p
MIR17HG	NANOG	hsa-miR-150-5p, hsa-miR-181a-3p, hsa-miR-302a-3p, hsa-miR-34a-5p, hsa-miR-34c-5p
MIR17HG	MDM2	hsa-miR-17-5p, hsa-miR-18b-5p, hsa-miR-20a-5p, hsa-miR-221-3p, hsa-miR-25-3p, hsa-miR-32-5p, hsa-miR-367-3p, hsa-miR-410-3p
MIR17HG	MAP3K12	hsa-miR-130a-3p, hsa-miR-17-5p, hsa-miR-20a-5p
MIR17HG	LEFTY2	hsa-miR-302a-3p, hsa-miR-302d-3p, hsa-miR-373-3p
MIR17HG	ERBB2IP	hsa-miR-141-3p, hsa-miR-200a-3p, hsa-miR-200c-3p
MIR17HG	DICER1	hsa-miR-103a-3p, hsa-miR-107, hsa-miR-130a-3p, hsa-miR-130b-3p, hsa-miR-18a-5p, hsa-miR-200c-3p, hsa-miR-221-3p, hsa-miR-222-3p
MIR17HG	BCL2	hsa-miR-139-5p, hsa-miR-141-3p, hsa-miR-148a-3p, hsa-miR-153-3p, hsa-miR-16-5p, hsa-miR-17-5p, hsa-miR-181a-5p, hsa-miR-181b-5p, hsa-miR-181c-5p, hsa-miR-181d-5p, hsa-miR-18a-5p, hsa-miR-200c-3p, hsa-miR-205-5p, hsa-miR-20a-5p, hsa-miR-30b-5p, hsa-miR-34a-3p, hsa-miR-34a-5p, hsa-miR-34c-5p, hsa-miR-448, hsa-miR-449a, hsa-miR-494-3p, hsa-miR-708-5p
MIR17HG	AXIN2	hsa-miR-107, hsa-miR-16-5p, hsa-miR-34a-3p, hsa-miR-34a-5p
MIR17HG	ARID4B	hsa-miR-106a-5p, hsa-miR-19b-3p, hsa-miR-20b-5p, hsa-miR-92a-3p
MIR17HG	SSX2IP	hsa-miR-155-5p, hsa-miR-221-3p, hsa-miR-222-3p
MIR17HG	SP1	hsa-miR-150-5p, hsa-miR-200c-3p, hsa-miR-22-3p, hsa-miR-324-5p, hsa-miR-330-3p, hsa-miR-33a-5p, hsa-miR-375
MIR17HG	PHLPP1	hsa-miR-141-3p, hsa-miR-17-5p, hsa-miR-18a-5p, hsa-miR-19a-3p, hsa-miR-375, hsa-miR-92a-3p
MIR17HG	MYCN	hsa-miR-103a-3p, hsa-miR-19a-3p, hsa-miR-19b-3p, hsa-miR-34a-5p, hsa-miR-34c-5p, hsa-miR-375, hsa-miR-449a, hsa-miR-449b-5p
MIR17HG	MYB	hsa-miR-103a-3p, hsa-miR-106a-5p, hsa-miR-107, hsa-miR-150-5p, hsa-miR-155-5p, hsa-miR-16-5p, hsa-miR-200a-3p, hsa-miR-200c-3p, hsa-miR-34a-5p
MIR17HG	CTNNB1	hsa-miR-181a-5p, hsa-miR-200a-3p, hsa-miR-200a-5p, hsa-miR-320a, hsa-miR-34a-3p, hsa-miR-375, hsa-miR-92a-3p
MIR17HG	CDK2	hsa-miR-103a-3p, hsa-miR-141-3p, hsa-miR-17-5p, hsa-miR-200c-3p, hsa-miR-20a-5p, hsa-miR-302a-3p, hsa-miR-302b-3p, hsa-miR-302d-3p, hsa-miR-372-3p
MIR17HG	BTG1	hsa-miR-22-3p, hsa-miR-372-3p, hsa-miR-373-3p
MIAT	IFNG	hsa-miR-181a-5p, hsa-miR-27a-3p, hsa-miR-29b-3p
MIAT	XIAP	hsa-miR-181a-5p, hsa-miR-23a-3p, hsa-miR-7-5p
MIAT	TGFBR2	hsa-miR-17-5p, hsa-miR-19a-3p, hsa-miR-19b-3p, hsa-miR-27a-3p, hsa-miR-93-5p
MIAT	MTDH	hsa-miR-22-3p, hsa-miR-320a, hsa-miR-342-3p
MIAT	MAPK1	hsa-miR-17-5p, hsa-miR-181a-5p, hsa-miR-320a, hsa-miR-9-3p
MIAT	AKT3	hsa-miR-20b-5p, hsa-miR-29a-3p, hsa-miR-29b-3p, hsa-miR-29c-3p
MIAT	SPARC	hsa-miR-29a-3p, hsa-miR-29b-3p, hsa-miR-29c-3p
MIAT	PSAP	hsa-miR-19a-3p, hsa-miR-27a-3p, hsa-miR-27b-3p
MIAT	PDGFRB	hsa-miR-29a-3p, hsa-miR-29b-3p, hsa-miR-29c-3p
MIAT	NOTCH1	hsa-miR-139-5p, hsa-miR-181a-5p, hsa-miR-23b-3p, hsa-miR-27b-3p
MIAT	MMP2	hsa-miR-139-5p, hsa-miR-17-5p, hsa-miR-221-3p, hsa-miR-29a-3p, hsa-miR-29b-3p, hsa-miR-29c-3p, hsa-miR-9-3p
MIAT	LOX	hsa-miR-29a-3p, hsa-miR-29b-3p, hsa-miR-29c-3p
MIAT	KAT2B	hsa-miR-17-5p, hsa-miR-181a-5p, hsa-miR-19a-3p, hsa-miR-19b-3p, hsa-miR-93-5p
MIAT	GJA1	hsa-miR-221-3p, hsa-miR-23a-3p, hsa-miR-23b-3p
MIAT	FBN1	hsa-miR-29a-3p, hsa-miR-29b-3p, hsa-miR-29c-3p
MIAT	CXCL12	hsa-miR-221-3p, hsa-miR-23a-3p, hsa-miR-27b-3p
MIAT	COL5A2	hsa-miR-29a-3p, hsa-miR-29b-3p, hsa-miR-29c-3p
MIAT	COL4A1	hsa-miR-17-5p, hsa-miR-29a-3p, hsa-miR-29b-3p, hsa-miR-29c-3p
MIAT	COL3A1	hsa-miR-29a-3p, hsa-miR-29b-3p, hsa-miR-29c-3p
MIAT	COL1A1	hsa-miR-185-5p, hsa-miR-29b-3p, hsa-miR-29c-3p
MIAT	COL10A1	hsa-miR-29a-3p, hsa-miR-29b-3p, hsa-miR-29c-3p
MIAT	ADAM12	hsa-miR-29a-3p, hsa-miR-29b-3p, hsa-miR-29c-3p
MIAT	TET2	hsa-miR-22-3p, hsa-miR-29a-3p, hsa-miR-29b-3p, hsa-miR-29c-3p, hsa-miR-7-5p
MIAT	STAT3	hsa-miR-17-5p, hsa-miR-181a-5p, hsa-miR-20b-5p, hsa-miR-23a-3p, hsa-miR-29b-3p
MIAT	PIK3CG	hsa-miR-27a-3p, hsa-miR-29b-3p, hsa-miR-7-5p
MIAT	NCOA3	hsa-miR-17-5p, hsa-miR-19b-3p, hsa-miR-29b-3p
MIAT	MCL1	hsa-miR-139-5p, hsa-miR-181a-5p, hsa-miR-29a-3p, hsa-miR-29b-3p, hsa-miR-29c-3p, hsa-miR-320a
MIAT	ITGB1	hsa-miR-29a-3p, hsa-miR-29b-3p, hsa-miR-29c-3p, hsa-miR-9-3p
MIAT	HIF1A	hsa-miR-17-5p, hsa-miR-20b-5p, hsa-miR-22-3p, hsa-miR-23b-3p, hsa-miR-27a-3p
MIAT	GSK3B	hsa-miR-129-1-3p, hsa-miR-27a-3p, hsa-miR-29a-3p, hsa-miR-29b-3p
MIAT	CLIC4	hsa-miR-17-5p, hsa-miR-19a-3p, hsa-miR-19b-3p, hsa-miR-93-5p
MIAT	CDC42	hsa-miR-185-5p, hsa-miR-29a-3p, hsa-miR-29b-3p, hsa-miR-29c-3p
MIAT	ABCA1	hsa-miR-17-5p, hsa-miR-19a-3p, hsa-miR-19b-3p, hsa-miR-27a-3p, hsa-miR-27b-3p, hsa-miR-93-5p
MIAT	TNFAIP3	hsa-miR-19a-3p, hsa-miR-19b-3p, hsa-miR-29a-3p, hsa-miR-29b-3p, hsa-miR-29c-3p
MIAT	SP1	hsa-miR-149-5p, hsa-miR-22-3p, hsa-miR-27a-3p, hsa-miR-29b-3p, hsa-miR-29c-3p
MIAT	RUNX1	hsa-miR-17-5p, hsa-miR-181a-5p, hsa-miR-221-3p, hsa-miR-27b-3p
MIAT	LDLR	hsa-miR-17-5p, hsa-miR-27a-3p, hsa-miR-27b-3p
MIAT	CLIP1	hsa-miR-17-5p, hsa-miR-19a-3p, hsa-miR-19b-3p, hsa-miR-93-5p
MEG8	TGFBR1	hsa-let-7b-5p, hsa-let-7g-5p, hsa-miR-27b-3p
MEG8	NOTCH1	hsa-miR-23b-3p, hsa-miR-24-3p, hsa-miR-27b-3p, hsa-miR-9-5p
MEG8	COL3A1	hsa-let-7b-5p, hsa-let-7d-5p, hsa-miR-29b-1-5p
MEG8	ETS1	hsa-miR-126-5p, hsa-miR-23b-3p, hsa-miR-9-5p
MEG8	DICER1	hsa-let-7a-5p, hsa-let-7d-5p, hsa-miR-9-5p
MEG8	CREB1	hsa-miR-27a-3p, hsa-miR-27b-3p, hsa-miR-9-5p
MEG3	CCND1	hsa-let-7b-5p, hsa-let-7e-5p, hsa-let-7f-5p, hsa-miR-106a-5p, hsa-miR-106b-5p, hsa-miR-135a-5p, hsa-miR-1-3p, hsa-miR-141-3p, hsa-miR-145-5p, hsa-miR-15a-5p, hsa-miR-15b-5p, hsa-miR-16-5p, hsa-miR-17-5p, hsa-miR-195-5p, hsa-miR-19b-1-5p, hsa-miR-200a-3p, hsa-miR-20a-5p, hsa-miR-24-3p, hsa-miR-27a-3p, hsa-miR-296-5p, hsa-miR-29a-3p, hsa-miR-29b-3p, hsa-miR-338-3p, hsa-miR-34a-3p, hsa-miR-34b-3p, h…
MEG3	YAP1	hsa-miR-141-3p, hsa-miR-15a-5p, hsa-miR-16-5p, hsa-miR-195-5p, hsa-miR-199a-3p, hsa-miR-200a-3p, hsa-miR-27a-3p
MEG3	FGFR3	hsa-miR-100-5p, hsa-miR-24-3p, hsa-miR-425-5p, hsa-miR-99a-5p
MEG3	XIAP	hsa-miR-181a-5p, hsa-miR-181b-5p, hsa-miR-186-5p, hsa-miR-23a-3p, hsa-miR-24-3p, hsa-miR-33b-5p, hsa-miR-34a-3p, hsa-miR-7-5p
MEG3	MAPK9	hsa-miR-106a-5p, hsa-miR-106b-5p, hsa-miR-141-3p, hsa-miR-17-5p, hsa-miR-199a-3p, hsa-miR-20a-5p, hsa-miR-20b-5p, hsa-miR-93-5p
MEG3	ITGB3	hsa-let-7a-5p, hsa-miR-124-3p, hsa-miR-17-3p, hsa-miR-30a-5p, hsa-miR-320a, hsa-miR-338-3p
MEG3	CTGF	hsa-miR-124-3p, hsa-miR-143-3p, hsa-miR-145-5p, hsa-miR-18a-5p, hsa-miR-18b-5p, hsa-miR-26a-5p, hsa-miR-26b-5p, hsa-miR-30c-5p, hsa-miR-483-3p
MEG3	CDKN1A	hsa-let-7a-5p, hsa-miR-106a-5p, hsa-miR-106b-5p, hsa-miR-125a-5p, hsa-miR-132-3p, hsa-miR-135a-5p, hsa-miR-145-5p, hsa-miR-146b-5p, hsa-miR-15a-5p, hsa-miR-16-5p, hsa-miR-17-3p, hsa-miR-17-5p, hsa-miR-181a-5p, hsa-miR-18a-5p, hsa-miR-19b-3p, hsa-miR-20a-5p, hsa-miR-20b-5p, hsa-miR-22-3p, hsa-miR-28-5p, hsa-miR-29b-3p, hsa-miR-363-3p, hsa-miR-423-3p, hsa-miR-519a-3p, hsa-miR-519b-3p, hsa-miR-519c-…
MEG3	TIMP3	hsa-miR-103a-3p, hsa-miR-17-3p, hsa-miR-17-5p, hsa-miR-181b-5p, hsa-miR-20a-5p
MEG3	TIMP1	hsa-miR-145-5p, hsa-miR-181a-5p, hsa-miR-19a-5p, hsa-miR-218-5p, hsa-miR-377-3p, hsa-miR-519a-3p
MEG3	SMAD7	hsa-miR-106b-5p, hsa-miR-15b-5p, hsa-miR-185-5p, hsa-miR-195-5p, hsa-miR-20a-5p, hsa-miR-217, hsa-miR-424-5p, hsa-miR-497-5p, hsa-miR-93-5p
MEG3	SERPINE1	hsa-miR-143-3p, hsa-miR-145-5p, hsa-miR-148a-3p, hsa-miR-30b-5p, hsa-miR-30c-5p, hsa-miR-99a-5p
MEG3	PDGFRB	hsa-miR-24-3p, hsa-miR-29a-3p, hsa-miR-29b-3p, hsa-miR-29c-3p, hsa-miR-30b-5p, hsa-miR-449b-5p, hsa-miR-9-5p
MEG3	PDGFRA	hsa-let-7b-5p, hsa-miR-140-5p, hsa-miR-146b-5p, hsa-miR-218-5p, hsa-miR-29b-3p, hsa-miR-449b-5p
MEG3	NRP1	hsa-miR-148a-3p, hsa-miR-26a-5p, hsa-miR-320a, hsa-miR-338-3p, hsa-miR-9-5p
MEG3	MMP13	hsa-miR-100-5p, hsa-miR-125b-5p, hsa-miR-127-3p, hsa-miR-143-3p, hsa-miR-27b-3p, hsa-miR-9-5p
MEG3	ITGA5	hsa-miR-148a-3p, hsa-miR-148b-3p, hsa-miR-17-3p, hsa-miR-26a-5p, hsa-miR-326, hsa-miR-92a-3p
MEG3	HGF	hsa-miR-16-5p, hsa-miR-199a-3p, hsa-miR-200a-3p, hsa-miR-26a-5p, hsa-miR-26b-5p
MEG3	GJA1	hsa-miR-1-3p, hsa-miR-186-5p, hsa-miR-200a-3p, hsa-miR-20a-5p, hsa-miR-218-5p, hsa-miR-23a-3p, hsa-miR-23b-3p
MEG3	FN1	hsa-let-7g-5p, hsa-miR-124-3p, hsa-miR-132-3p, hsa-miR-1-3p, hsa-miR-26a-5p, hsa-miR-26b-5p, hsa-miR-29b-3p
MEG3	FBN1	hsa-miR-29a-3p, hsa-miR-29b-3p, hsa-miR-29c-3p, hsa-miR-486-5p
MEG3	COL4A1	hsa-miR-17-5p, hsa-miR-20a-5p, hsa-miR-29a-3p, hsa-miR-29b-3p, hsa-miR-29c-3p
MEG3	COL3A1	hsa-let-7b-5p, hsa-let-7d-5p, hsa-miR-143-3p, hsa-miR-29a-3p, hsa-miR-29a-5p, hsa-miR-29b-1-5p, hsa-miR-29b-3p, hsa-miR-29c-3p
MEG3	COL1A2	hsa-let-7g-5p, hsa-miR-26b-5p, hsa-miR-29a-3p, hsa-miR-29c-3p
MEG3	COL1A1	hsa-miR-143-3p, hsa-miR-185-5p, hsa-miR-29b-1-5p, hsa-miR-29b-3p, hsa-miR-29c-3p
MEG3	YOD1	hsa-miR-106b-5p, hsa-miR-17-3p, hsa-miR-17-5p, hsa-miR-18a-5p, hsa-miR-19b-3p, hsa-miR-20a-5p, hsa-miR-93-5p
MEG3	TET2	hsa-miR-125b-5p, hsa-miR-22-3p, hsa-miR-26a-5p, hsa-miR-29a-3p, hsa-miR-29b-3p, hsa-miR-29c-3p, hsa-miR-7-5p
MEG3	STAT3	hsa-let-7a-5p, hsa-miR-106a-5p, hsa-miR-106b-5p, hsa-miR-124-3p, hsa-miR-124-5p, hsa-miR-125a-5p, hsa-miR-125b-5p, hsa-miR-148a-3p, hsa-miR-17-5p, hsa-miR-181a-5p, hsa-miR-20a-5p, hsa-miR-20b-5p, hsa-miR-23a-3p, hsa-miR-29b-1-5p, hsa-miR-29b-3p, hsa-miR-519a-3p, hsa-miR-520c-3p, hsa-miR-544a, hsa-miR-874-3p, hsa-miR-92a-3p
MEG3	SMARCA5	hsa-miR-100-5p, hsa-miR-151a-5p, hsa-miR-99a-5p
MEG3	SGPL1	hsa-miR-124-3p, hsa-miR-125b-1-3p, hsa-miR-125b-5p
MEG3	RPS6KB1	hsa-miR-122-5p, hsa-miR-145-5p, hsa-miR-16-5p, hsa-miR-195-5p, hsa-miR-218-5p, hsa-miR-497-5p
MEG3	RASAL2	hsa-miR-136-5p, hsa-miR-30b-5p, hsa-miR-30c-5p
MEG3	PIM1	hsa-miR-124-3p, hsa-miR-1-3p, hsa-miR-16-5p, hsa-miR-214-3p, hsa-miR-33a-5p, hsa-miR-33b-5p, hsa-miR-542-3p
MEG3	NCOA3	hsa-miR-137, hsa-miR-17-3p, hsa-miR-17-5p, hsa-miR-18a-5p, hsa-miR-19b-3p, hsa-miR-29b-3p, hsa-miR-33a-5p
MEG3	JAK1	hsa-miR-106b-5p, hsa-miR-107, hsa-miR-17-5p, hsa-miR-30c-5p
MEG3	ITGB1	hsa-miR-124-3p, hsa-miR-143-3p, hsa-miR-29a-3p, hsa-miR-29b-3p, hsa-miR-29c-3p, hsa-miR-9-3p
MEG3	IRS2	hsa-let-7b-5p, hsa-miR-135a-5p, hsa-miR-145-5p, hsa-miR-338-3p, hsa-miR-33a-5p, hsa-miR-7-5p
MEG3	IGF1R	hsa-let-7a-5p, hsa-let-7b-5p, hsa-let-7e-5p, hsa-miR-100-5p, hsa-miR-122-5p, hsa-miR-125b-5p, hsa-miR-140-5p, hsa-miR-141-3p, hsa-miR-143-3p, hsa-miR-145-5p, hsa-miR-148a-3p, hsa-miR-16-5p, hsa-miR-181b-5p, hsa-miR-185-5p, hsa-miR-214-5p, hsa-miR-217, hsa-miR-223-5p, hsa-miR-26b-5p, hsa-miR-320a, hsa-miR-376a-3p, hsa-miR-486-5p, hsa-miR-497-5p, hsa-miR-7-5p, hsa-miR-99a-5p
MEG3	HMGA2	hsa-let-7a-5p, hsa-let-7b-5p, hsa-let-7d-5p, hsa-let-7e-5p, hsa-let-7f-5p, hsa-let-7g-5p, hsa-miR-106a-5p, hsa-miR-107, hsa-miR-125b-5p, hsa-miR-145-5p, hsa-miR-154-5p, hsa-miR-15a-5p, hsa-miR-16-5p, hsa-miR-204-5p, hsa-miR-23b-3p, hsa-miR-26a-5p, hsa-miR-29b-3p, hsa-miR-33a-5p, hsa-miR-33b-3p, hsa-miR-33b-5p, hsa-miR-485-5p, hsa-miR-543
MEG3	HDAC4	hsa-miR-125a-5p, hsa-miR-1-3p, hsa-miR-140-5p, hsa-miR-22-3p, hsa-miR-29b-3p, hsa-miR-30c-5p, hsa-miR-9-5p
MEG3	ETS1	hsa-miR-124-3p, hsa-miR-125b-5p, hsa-miR-126-5p, hsa-miR-1-3p, hsa-miR-145-5p, hsa-miR-199a-5p, hsa-miR-23b-3p, hsa-miR-324-5p, hsa-miR-9-5p
MEG3	CLIC4	hsa-miR-106b-5p, hsa-miR-122-5p, hsa-miR-17-3p, hsa-miR-17-5p, hsa-miR-18a-5p, hsa-miR-19b-3p, hsa-miR-20a-5p, hsa-miR-93-5p
MEG3	BMPR2	hsa-miR-100-5p, hsa-miR-135a-5p, hsa-miR-17-5p, hsa-miR-181c-5p, hsa-miR-19b-3p, hsa-miR-20a-5p, hsa-miR-92a-3p
MEG3	BACH1	hsa-miR-106b-5p, hsa-miR-17-3p, hsa-miR-17-5p, hsa-miR-18a-5p, hsa-miR-19b-3p, hsa-miR-20a-5p, hsa-miR-93-5p
MEG3	ARID4B	hsa-miR-106a-5p, hsa-miR-19b-3p, hsa-miR-20b-5p, hsa-miR-92a-3p
MEG3	ADAM17	hsa-miR-122-5p, hsa-miR-145-5p, hsa-miR-26a-5p, hsa-miR-338-3p
MEG3	ACTB	hsa-miR-145-5p, hsa-miR-15a-5p, hsa-miR-15b-5p, hsa-miR-16-5p, hsa-miR-28-5p, hsa-miR-29b-3p, hsa-miR-33a-5p, hsa-miR-497-5p
MEG3	S1PR1	hsa-miR-125b-1-3p, hsa-miR-148a-3p, hsa-miR-24-3p, hsa-miR-363-3p
MEG3	RUNX1	hsa-miR-106a-5p, hsa-miR-17-5p, hsa-miR-181a-5p, hsa-miR-18a-5p, hsa-miR-20a-5p, hsa-miR-27b-3p, hsa-miR-9-5p
MEG3	PTEN	hsa-miR-103a-3p, hsa-miR-106a-5p, hsa-miR-106b-5p, hsa-miR-107, hsa-miR-141-3p, hsa-miR-17-3p, hsa-miR-17-5p, hsa-miR-181a-5p, hsa-miR-181b-5p, hsa-miR-181c-5p, hsa-miR-18a-5p, hsa-miR-19b-3p, hsa-miR-200a-3p, hsa-miR-20a-5p, hsa-miR-20b-5p, hsa-miR-214-3p, hsa-miR-217, hsa-miR-22-3p, hsa-miR-23a-3p, hsa-miR-23b-3p, hsa-miR-26a-5p, hsa-miR-26b-5p, hsa-miR-29a-3p, hsa-miR-29a-5p, hsa-miR-29b-3p, h…
MEG3	PRDM1	hsa-let-7a-5p, hsa-let-7b-5p, hsa-let-7f-5p, hsa-miR-125a-3p, hsa-miR-125b-5p, hsa-miR-127-3p, hsa-miR-30a-5p, hsa-miR-9-5p
MEG3	PER1	hsa-miR-146b-3p, hsa-miR-29a-3p, hsa-miR-29b-3p, hsa-miR-29c-3p
MEG3	PELI1	hsa-miR-106b-5p, hsa-miR-17-3p, hsa-miR-17-5p, hsa-miR-18a-5p, hsa-miR-19b-3p, hsa-miR-20a-5p, hsa-miR-93-5p
MEG3	NCOR2	hsa-miR-100-5p, hsa-miR-125b-5p, hsa-miR-16-5p, hsa-miR-30c-5p, hsa-miR-34a-3p
MEG3	MYCN	hsa-let-7e-5p, hsa-miR-103a-3p, hsa-miR-19b-3p, hsa-miR-29a-3p, hsa-miR-29b-3p, hsa-miR-29c-3p, hsa-miR-34b-3p, hsa-miR-449b-5p, hsa-miR-542-3p
MEG3	MEF2D	hsa-miR-103a-3p, hsa-miR-122-5p, hsa-miR-17-5p, hsa-miR-18a-5p, hsa-miR-20a-5p
MEG3	MAPK8	hsa-miR-199a-3p, hsa-miR-214-3p, hsa-miR-26a-5p, hsa-miR-92a-3p
MEG3	MAPK14	hsa-miR-124-3p, hsa-miR-125a-5p, hsa-miR-125b-5p, hsa-miR-141-3p, hsa-miR-145-5p, hsa-miR-199a-3p, hsa-miR-200a-3p, hsa-miR-24-3p, hsa-miR-27a-3p
MEG3	LAMC1	hsa-miR-124-3p, hsa-miR-140-5p, hsa-miR-29b-3p, hsa-miR-29c-3p
MEG3	KDR	hsa-miR-15b-5p, hsa-miR-16-5p, hsa-miR-17-3p, hsa-miR-195-5p, hsa-miR-199a-3p, hsa-miR-19b-1-5p, hsa-miR-24-3p, hsa-miR-296-5p, hsa-miR-326
MEG3	GPR78	hsa-miR-181a-5p, hsa-miR-199a-5p, hsa-miR-30d-5p
MEG3	CLIP1	hsa-miR-106b-5p, hsa-miR-17-3p, hsa-miR-17-5p, hsa-miR-18a-5p, hsa-miR-19b-3p, hsa-miR-20a-5p, hsa-miR-93-5p
MEG3	APP	hsa-let-7a-5p, hsa-let-7d-5p, hsa-miR-106a-5p, hsa-miR-106b-5p, hsa-miR-15a-5p, hsa-miR-16-5p, hsa-miR-17-5p, hsa-miR-20a-5p, hsa-miR-520c-3p
MEF2C-AS1	FOXO3	hsa-miR-126-3p, hsa-miR-182-5p, hsa-miR-23a-3p, hsa-miR-96-5p
MCM3AP-AS1	YAP1	hsa-miR-15a-5p, hsa-miR-16-5p, hsa-miR-195-5p, hsa-miR-199a-3p
MCM3AP-AS1	ESR1	hsa-miR-18a-5p, hsa-miR-18b-5p, hsa-miR-19a-3p, hsa-miR-19b-3p, hsa-miR-26a-5p
MCM3AP-AS1	TGFBR3	hsa-let-7a-5p, hsa-miR-21-5p, hsa-miR-424-5p
MCM3AP-AS1	SMAD4	hsa-miR-144-3p, hsa-miR-18a-5p, hsa-miR-19a-3p, hsa-miR-19b-3p, hsa-miR-204-5p, hsa-miR-224-5p, hsa-miR-26a-5p, hsa-miR-26b-5p
MCM3AP-AS1	PDCD4	hsa-miR-106a-5p, hsa-miR-21-5p, hsa-miR-320a, hsa-miR-330-3p, hsa-miR-744-3p
MCM3AP-AS1	IKBKB	hsa-miR-132-3p, hsa-miR-148a-3p, hsa-miR-497-5p, hsa-miR-503-5p
MCM3AP-AS1	MYB	hsa-miR-106a-5p, hsa-miR-15a-5p, hsa-miR-16-5p, hsa-miR-195-5p, hsa-miR-424-5p, hsa-miR-503-5p
MCM3AP-AS1	CCKBR	hsa-miR-148a-3p, hsa-miR-148b-3p, hsa-miR-488-3p
MAPKAPK5-AS1	UBE2I	hsa-miR-200c-3p, hsa-miR-30c-5p, hsa-miR-30e-5p
MAPKAPK5-AS1	TDG	hsa-miR-29a-3p, hsa-miR-29b-3p, hsa-miR-29c-3p
MAPKAPK5-AS1	FOXO3	hsa-miR-182-5p, hsa-miR-217, hsa-miR-23a-3p, hsa-miR-29a-3p, hsa-miR-30c-5p, hsa-miR-96-5p
MAPKAPK5-AS1	CDK4	hsa-miR-124-3p, hsa-miR-1-3p, hsa-miR-145-5p, hsa-miR-182-5p, hsa-miR-29a-3p, hsa-miR-486-5p
MALAT1	SNAI1	hsa-miR-128-3p, hsa-miR-199a-5p, hsa-miR-204-5p, hsa-miR-211-5p, hsa-miR-217, hsa-miR-22-3p, hsa-miR-26a-5p, hsa-miR-30a-5p, hsa-miR-30b-5p, hsa-miR-30c-2-3p, hsa-miR-30c-5p, hsa-miR-30d-5p, hsa-miR-30e-5p, hsa-miR-326, hsa-miR-34a-5p, hsa-miR-34b-3p, hsa-miR-34c-5p, hsa-miR-410-3p, hsa-miR-486-5p, hsa-miR-506-3p
MALAT1	TMED7	hsa-let-7a-5p, hsa-miR-148a-3p, hsa-miR-181b-5p, hsa-miR-221-3p, hsa-miR-222-3p, hsa-miR-24-3p, hsa-miR-451a
MALAT1	TGFBR2	hsa-miR-106a-5p, hsa-miR-130a-3p, hsa-miR-142-5p, hsa-miR-145-5p, hsa-miR-17-5p, hsa-miR-181c-5p, hsa-miR-18a-5p, hsa-miR-19a-3p, hsa-miR-202-5p, hsa-miR-204-5p, hsa-miR-20a-5p, hsa-miR-211-5p, hsa-miR-21-5p, hsa-miR-27a-3p, hsa-miR-302b-3p, hsa-miR-302d-3p, hsa-miR-370-3p, hsa-miR-372-3p, hsa-miR-373-3p, hsa-miR-520a-3p, hsa-miR-590-5p, hsa-miR-655-3p, hsa-miR-92a-3p, hsa-miR-93-5p, hsa-miR-9-5p
MALAT1	PBX3	hsa-miR-144-3p, hsa-miR-181a-5p, hsa-miR-181b-5p, hsa-miR-320a, hsa-miR-33a-3p, hsa-miR-495-3p, hsa-miR-497-5p, hsa-miR-98-5p
MALAT1	MAPK1	hsa-let-7a-5p, hsa-let-7b-5p, hsa-miR-126-5p, hsa-miR-129-5p, hsa-miR-132-3p, hsa-miR-17-5p, hsa-miR-181a-5p, hsa-miR-197-3p, hsa-miR-199a-3p, hsa-miR-20a-5p, hsa-miR-214-3p, hsa-miR-28-5p, hsa-miR-320a, hsa-miR-329-3p, hsa-miR-335-5p, hsa-miR-377-3p, hsa-miR-378a-3p, hsa-miR-451a, hsa-miR-550a-3p, hsa-miR-9-3p
MALAT1	EGFR	hsa-let-7a-5p, hsa-miR-125a-5p, hsa-miR-125b-5p, hsa-miR-128-3p, hsa-miR-132-3p, hsa-miR-133b, hsa-miR-135a-5p, hsa-miR-137, hsa-miR-145-5p, hsa-miR-146a-5p, hsa-miR-146b-5p, hsa-miR-200a-3p, hsa-miR-21-5p, hsa-miR-218-5p, hsa-miR-219a-5p, hsa-miR-27a-3p, hsa-miR-27b-3p, hsa-miR-302b-3p, hsa-miR-491-5p, hsa-miR-520b, hsa-miR-520e, hsa-miR-542-5p, hsa-miR-574-3p, hsa-miR-7-1-3p, hsa-miR-7-5p
MALAT1	ZEB1	hsa-miR-101-3p, hsa-miR-10b-5p, hsa-miR-130b-3p, hsa-miR-141-3p, hsa-miR-142-5p, hsa-miR-144-3p, hsa-miR-150-5p, hsa-miR-200a-3p, hsa-miR-200b-3p, hsa-miR-200c-3p, hsa-miR-205-5p, hsa-miR-223-3p, hsa-miR-23b-3p, hsa-miR-33b-5p, hsa-miR-409-3p, hsa-miR-429, hsa-miR-455-3p, hsa-miR-484, hsa-miR-494-3p, hsa-miR-539-5p, hsa-miR-590-3p, hsa-miR-652-3p, hsa-miR-655-3p, hsa-miR-96-5p
MALAT1	RUNX2	hsa-miR-103a-3p, hsa-miR-135a-5p, hsa-miR-155-5p, hsa-miR-195-5p, hsa-miR-204-5p, hsa-miR-205-5p, hsa-miR-218-5p, hsa-miR-221-5p, hsa-miR-222-3p, hsa-miR-23b-3p, hsa-miR-29b-3p, hsa-miR-30a-3p, hsa-miR-30a-5p, hsa-miR-30b-5p, hsa-miR-30c-5p, hsa-miR-30d-5p, hsa-miR-320a, hsa-miR-335-5p, hsa-miR-34c-5p, hsa-miR-376c-3p, hsa-miR-433-3p, hsa-miR-497-5p
MALAT1	NRP1	hsa-miR-148a-3p, hsa-miR-152-3p, hsa-miR-206, hsa-miR-26a-5p, hsa-miR-320a, hsa-miR-338-3p, hsa-miR-338-5p, hsa-miR-9-5p
MALAT1	NR4A2	hsa-miR-129-5p, hsa-miR-19a-3p, hsa-miR-206, hsa-miR-217, hsa-miR-302d-3p, hsa-miR-34a-5p, hsa-miR-372-3p
MALAT1	NFIA	hsa-miR-107, hsa-miR-181b-5p, hsa-miR-21-5p, hsa-miR-223-3p, hsa-miR-29a-3p, hsa-miR-302b-3p, hsa-miR-382-5p, hsa-miR-424-5p
MALAT1	WNK1	hsa-miR-141-5p, hsa-miR-192-5p, hsa-miR-199a-5p, hsa-miR-215-5p, hsa-miR-24-1-5p, hsa-miR-27a-3p, hsa-miR-506-3p
MALAT1	VEGFA	hsa-miR-101-3p, hsa-miR-101-5p, hsa-miR-106a-5p, hsa-miR-106b-5p, hsa-miR-107, hsa-miR-125a-3p, hsa-miR-125a-5p, hsa-miR-126-5p, hsa-miR-134-5p, hsa-miR-1-3p, hsa-miR-140-5p, hsa-miR-141-3p, hsa-miR-145-5p, hsa-miR-146a-5p, hsa-miR-147a, hsa-miR-150-5p, hsa-miR-15a-5p, hsa-miR-15b-5p, hsa-miR-16-1-3p, hsa-miR-16-5p, hsa-miR-17-5p, hsa-miR-181a-5p, hsa-miR-185-5p, hsa-miR-186-5p, hsa-miR-195-5p, h…
MALAT1	TIAM1	hsa-miR-10b-5p, hsa-miR-141-3p, hsa-miR-182-5p, hsa-miR-21-5p, hsa-miR-22-3p, hsa-miR-29c-3p, hsa-miR-31-5p, hsa-miR-329-3p
MALAT1	STAT3	hsa-let-7a-5p, hsa-let-7c-5p, hsa-miR-106a-5p, hsa-miR-106b-5p, hsa-miR-124-3p, hsa-miR-124-5p, hsa-miR-125a-5p, hsa-miR-125b-5p, hsa-miR-130b-3p, hsa-miR-148a-3p, hsa-miR-17-5p, hsa-miR-181a-5p, hsa-miR-20a-5p, hsa-miR-20b-5p, hsa-miR-21-3p, hsa-miR-21-5p, hsa-miR-223-3p, hsa-miR-23a-3p, hsa-miR-29b-1-5p, hsa-miR-29b-3p, hsa-miR-340-5p, hsa-miR-375, hsa-miR-519d-3p, hsa-miR-520c-3p, hsa-miR-544a…
MALAT1	SMAD2	hsa-let-7g-5p, hsa-miR-125a-5p, hsa-miR-128-3p, hsa-miR-132-3p, hsa-miR-145-5p, hsa-miR-146a-5p, hsa-miR-148a-3p, hsa-miR-155-5p, hsa-miR-15b-5p, hsa-miR-18a-5p, hsa-miR-18b-5p, hsa-miR-200a-3p, hsa-miR-200b-3p, hsa-miR-205-5p, hsa-miR-206, hsa-miR-212-3p, hsa-miR-27a-3p, hsa-miR-27b-3p, hsa-miR-323a-3p, hsa-miR-425-5p, hsa-miR-484, hsa-miR-486-5p
MALAT1	SIRT1	hsa-miR-124-3p, hsa-miR-128-3p, hsa-miR-132-3p, hsa-miR-133b, hsa-miR-138-5p, hsa-miR-142-5p, hsa-miR-181a-5p, hsa-miR-181b-5p, hsa-miR-181c-5p, hsa-miR-199a-5p, hsa-miR-199b-5p, hsa-miR-200c-3p, hsa-miR-204-5p, hsa-miR-216a-5p, hsa-miR-217, hsa-miR-221-3p, hsa-miR-22-3p, hsa-miR-23b-3p, hsa-miR-29c-3p, hsa-miR-34a-3p, hsa-miR-34a-5p, hsa-miR-373-3p, hsa-miR-449a, hsa-miR-449b-5p, hsa-miR-520c-3p…
MALAT1	RAF1	hsa-miR-125a-5p, hsa-miR-125b-5p, hsa-miR-132-3p, hsa-miR-139-5p, hsa-miR-16-5p, hsa-miR-195-5p, hsa-miR-497-5p, hsa-miR-7-1-3p, hsa-miR-7-5p
MALAT1	NANOG	hsa-miR-128-3p, hsa-miR-134-5p, hsa-miR-145-5p, hsa-miR-150-5p, hsa-miR-181a-3p, hsa-miR-302a-3p, hsa-miR-34a-5p, hsa-miR-34b-3p, hsa-miR-34c-5p
MALAT1	MCL1	hsa-miR-101-3p, hsa-miR-106a-5p, hsa-miR-125a-5p, hsa-miR-125b-5p, hsa-miR-133b, hsa-miR-139-5p, hsa-miR-148b-5p, hsa-miR-181a-5p, hsa-miR-181b-5p, hsa-miR-193a-3p, hsa-miR-193b-3p, hsa-miR-20a-5p, hsa-miR-26a-5p, hsa-miR-29a-3p, hsa-miR-29b-3p, hsa-miR-29c-3p, hsa-miR-302b-3p, hsa-miR-30c-5p, hsa-miR-320a, hsa-miR-512-5p, hsa-miR-518a-5p, hsa-miR-582-5p, hsa-miR-876-3p
MALAT1	JAK2	hsa-miR-101-3p, hsa-miR-125a-5p, hsa-miR-125b-5p, hsa-miR-135a-5p, hsa-miR-204-5p, hsa-miR-216a-5p, hsa-miR-375
MALAT1	ITPR1	hsa-miR-204-5p, hsa-miR-211-5p, hsa-miR-34b-3p, hsa-miR-34c-5p, hsa-miR-424-5p, hsa-miR-448, hsa-miR-449a, hsa-miR-494-3p
MALAT1	IGF1R	hsa-let-7a-5p, hsa-let-7b-5p, hsa-let-7c-5p, hsa-let-7e-5p, hsa-miR-125b-2-3p, hsa-miR-125b-5p, hsa-miR-133b, hsa-miR-138-5p, hsa-miR-139-5p, hsa-miR-140-5p, hsa-miR-141-3p, hsa-miR-143-3p, hsa-miR-145-5p, hsa-miR-148a-3p, hsa-miR-150-3p, hsa-miR-152-3p, hsa-miR-15b-3p, hsa-miR-16-5p, hsa-miR-181b-5p, hsa-miR-185-5p, hsa-miR-194-5p, hsa-miR-214-5p, hsa-miR-21-5p, hsa-miR-217, hsa-miR-223-3p, hsa-…
MALAT1	HIF1A	hsa-miR-106a-5p, hsa-miR-106b-5p, hsa-miR-107, hsa-miR-138-1-3p, hsa-miR-138-5p, hsa-miR-142-5p, hsa-miR-155-5p, hsa-miR-17-5p, hsa-miR-186-5p, hsa-miR-18a-5p, hsa-miR-18b-5p, hsa-miR-199a-5p, hsa-miR-199b-5p, hsa-miR-20a-5p, hsa-miR-20b-5p, hsa-miR-22-3p, hsa-miR-23b-3p, hsa-miR-27a-3p, hsa-miR-338-3p, hsa-miR-33a-5p, hsa-miR-382-5p, hsa-miR-424-5p, hsa-miR-429, hsa-miR-433-3p, hsa-miR-497-3p
MALAT1	ETS1	hsa-miR-124-3p, hsa-miR-125b-5p, hsa-miR-126-5p, hsa-miR-1-3p, hsa-miR-144-3p, hsa-miR-145-5p, hsa-miR-155-5p, hsa-miR-193b-3p, hsa-miR-199a-5p, hsa-miR-200b-3p, hsa-miR-200c-3p, hsa-miR-208a-3p, hsa-miR-221-3p, hsa-miR-222-3p, hsa-miR-23b-3p, hsa-miR-31-5p, hsa-miR-324-5p, hsa-miR-499a-5p, hsa-miR-506-3p, hsa-miR-9-5p
MALAT1	DNMT1	hsa-miR-140-5p, hsa-miR-148a-3p, hsa-miR-152-3p, hsa-miR-17-5p, hsa-miR-185-5p, hsa-miR-18a-5p, hsa-miR-19a-3p, hsa-miR-200a-3p, hsa-miR-200b-3p, hsa-miR-20a-5p, hsa-miR-217, hsa-miR-29a-3p, hsa-miR-29b-3p, hsa-miR-301b-3p, hsa-miR-30a-5p, hsa-miR-30b-5p, hsa-miR-30c-5p, hsa-miR-342-3p, hsa-miR-377-3p, hsa-miR-429, hsa-miR-92a-3p
MALAT1	BCL2L11	hsa-miR-106b-5p, hsa-miR-10a-5p, hsa-miR-10b-5p, hsa-miR-148a-3p, hsa-miR-17-5p, hsa-miR-181a-5p, hsa-miR-181b-5p, hsa-miR-19a-3p, hsa-miR-20a-5p, hsa-miR-214-3p, hsa-miR-221-3p, hsa-miR-24-3p, hsa-miR-25-3p, hsa-miR-301a-3p, hsa-miR-301b-3p, hsa-miR-32-5p, hsa-miR-363-3p, hsa-miR-423-3p, hsa-miR-488-3p, hsa-miR-494-3p, hsa-miR-92a-3p, hsa-miR-9-5p
MALAT1	SUZ12	hsa-miR-101-3p, hsa-miR-128-3p, hsa-miR-138-5p, hsa-miR-19a-3p, hsa-miR-200b-3p, hsa-miR-200c-3p, hsa-miR-320a, hsa-miR-487b-3p
MALAT1	PTEN	hsa-miR-103a-3p, hsa-miR-106a-5p, hsa-miR-106b-3p, hsa-miR-106b-5p, hsa-miR-107, hsa-miR-10a-5p, hsa-miR-10b-5p, hsa-miR-128-3p, hsa-miR-130a-3p, hsa-miR-130a-5p, hsa-miR-130b-3p, hsa-miR-141-3p, hsa-miR-142-5p, hsa-miR-144-3p, hsa-miR-152-3p, hsa-miR-155-5p, hsa-miR-17-3p, hsa-miR-17-5p, hsa-miR-181a-5p, hsa-miR-181b-5p, hsa-miR-181c-5p, hsa-miR-182-5p, hsa-miR-18a-5p, hsa-miR-190b, hsa-miR-193a…
MALAT1	MBNL2	hsa-miR-10b-5p, hsa-miR-218-5p, hsa-miR-302d-3p, hsa-miR-30a-5p, hsa-miR-30b-5p, hsa-miR-30e-5p, hsa-miR-372-3p
MAL2	EZH2	hsa-let-7a-5p, hsa-let-7b-5p, hsa-let-7e-5p, hsa-miR-98-5p
MAGI2-AS3	DKK1	hsa-miR-31-5p, hsa-miR-372-3p, hsa-miR-373-3p, hsa-miR-9-5p
MAGI2-AS3	CCNG1	hsa-miR-23b-3p, hsa-miR-27b-3p, hsa-miR-9-5p
MAGI2-AS3	TGFBR1	hsa-let-7b-5p, hsa-let-7g-5p, hsa-miR-128-3p, hsa-miR-140-5p, hsa-miR-142-3p, hsa-miR-181a-5p, hsa-miR-204-5p, hsa-miR-20a-5p, hsa-miR-27b-3p
MAGI2-AS3	SPRED1	hsa-miR-126-5p, hsa-miR-132-3p, hsa-miR-31-5p
MAGI2-AS3	IL6	hsa-let-7a-5p, hsa-let-7f-5p, hsa-miR-107, hsa-miR-136-5p, hsa-miR-26a-5p, hsa-miR-365a-3p, hsa-miR-9-5p
MAGI2-AS3	IGF1	hsa-let-7i-5p, hsa-miR-128-3p, hsa-miR-129-5p, hsa-miR-130b-3p, hsa-miR-26a-5p, hsa-miR-27a-3p, hsa-miR-28-5p
MAGI2-AS3	EGR2	hsa-miR-142-3p, hsa-miR-17-5p, hsa-miR-20a-5p
MAGI2-AS3	CAV1	hsa-miR-103a-3p, hsa-miR-107, hsa-miR-124-3p
MAGI2-AS3	VIM	hsa-miR-124-3p, hsa-miR-129-5p, hsa-miR-132-3p, hsa-miR-196a-5p, hsa-miR-204-5p, hsa-miR-26a-5p, hsa-miR-29b-3p, hsa-miR-30c-5p, hsa-miR-9-5p
MAGI2-AS3	SNAI2	hsa-miR-124-3p, hsa-miR-128-3p, hsa-miR-183-5p, hsa-miR-204-5p, hsa-miR-30c-5p
MAGI2-AS3	SERPINE1	hsa-miR-143-3p, hsa-miR-301a-3p, hsa-miR-30b-5p, hsa-miR-30c-5p
MAGI2-AS3	RUNX2	hsa-miR-103a-3p, hsa-miR-135a-5p, hsa-miR-204-5p, hsa-miR-23b-3p, hsa-miR-29b-3p, hsa-miR-30b-5p, hsa-miR-30c-5p, hsa-miR-34c-5p
MAGI2-AS3	PLAU	hsa-miR-143-3p, hsa-miR-181a-5p, hsa-miR-23b-3p
MAGI2-AS3	PDGFRB	hsa-miR-29b-3p, hsa-miR-30b-5p, hsa-miR-34c-5p, hsa-miR-9-5p
MAGI2-AS3	PDGFRA	hsa-let-7b-5p, hsa-miR-130a-3p, hsa-miR-130b-3p, hsa-miR-140-5p, hsa-miR-29b-3p, hsa-miR-34c-5p
MAGI2-AS3	MMP2	hsa-miR-124-3p, hsa-miR-130b-3p, hsa-miR-139-5p, hsa-miR-143-3p, hsa-miR-17-5p, hsa-miR-29b-3p, hsa-miR-708-5p, hsa-miR-9-3p
MAGI2-AS3	MMP13	hsa-miR-143-3p, hsa-miR-27b-3p, hsa-miR-9-5p
MAGI2-AS3	GJA1	hsa-miR-130a-3p, hsa-miR-186-5p, hsa-miR-20a-5p, hsa-miR-23a-3p, hsa-miR-23b-3p
MAGI2-AS3	FN1	hsa-let-7g-5p, hsa-miR-124-3p, hsa-miR-132-3p, hsa-miR-26a-5p, hsa-miR-29b-3p
MAGI2-AS3	CXCL12	hsa-miR-126-5p, hsa-miR-137, hsa-miR-23a-3p, hsa-miR-27b-3p, hsa-miR-31-5p, hsa-miR-454-3p
MAGI2-AS3	COL1A1	hsa-miR-129-5p, hsa-miR-143-3p, hsa-miR-185-5p, hsa-miR-29b-3p
MAGI2-AS3	RAF1	hsa-miR-132-3p, hsa-miR-139-5p, hsa-miR-7-1-3p, hsa-miR-7-5p
MAGI2-AS3	MAP4K4	hsa-let-7a-5p, hsa-miR-31-5p, hsa-miR-520e
MAGI2-AS3	HIF1A	hsa-miR-107, hsa-miR-17-5p, hsa-miR-186-5p, hsa-miR-20a-5p, hsa-miR-20b-5p, hsa-miR-23b-3p, hsa-miR-27a-3p, hsa-miR-33a-5p, hsa-miR-382-5p
MAGI2-AS3	CLIC4	hsa-miR-17-5p, hsa-miR-19a-3p, hsa-miR-19b-3p, hsa-miR-20a-5p, hsa-miR-93-5p
MAGI2-AS3	SERPINB5	hsa-miR-103a-3p, hsa-miR-107, hsa-miR-7-5p
MAGI2-AS3	PTEN	hsa-miR-103a-3p, hsa-miR-107, hsa-miR-128-3p, hsa-miR-130a-3p, hsa-miR-130b-3p, hsa-miR-17-5p, hsa-miR-181a-5p, hsa-miR-19a-3p, hsa-miR-19b-3p, hsa-miR-20a-5p, hsa-miR-20b-5p, hsa-miR-23a-3p, hsa-miR-23b-3p, hsa-miR-26a-5p, hsa-miR-29b-3p, hsa-miR-301a-3p, hsa-miR-301b-3p, hsa-miR-302a-3p, hsa-miR-382-5p, hsa-miR-425-5p, hsa-miR-486-5p, hsa-miR-93-5p
MAGI2-AS3	PHLPP2	hsa-miR-135a-5p, hsa-miR-181a-5p, hsa-miR-20a-5p, hsa-miR-27a-3p, hsa-miR-372-3p, hsa-miR-93-5p
MAGI2-AS3	LATS2	hsa-miR-107, hsa-miR-31-5p, hsa-miR-372-3p, hsa-miR-373-3p, hsa-miR-93-5p
MAGI2-AS3	ATXN1	hsa-miR-130a-3p, hsa-miR-19a-3p, hsa-miR-19b-3p
LY86-AS1	HMGCR	hsa-miR-27a-3p, hsa-miR-29a-3p, hsa-miR-29b-3p, hsa-miR-29c-3p
LRRC75A-AS1	HMGB1	hsa-miR-142-3p, hsa-miR-205-5p, hsa-miR-21-5p, hsa-miR-218-5p, hsa-miR-22-3p, hsa-miR-320a, hsa-miR-34a-5p
LRRC75A-AS1	SPRY2	hsa-miR-21-5p, hsa-miR-23a-3p, hsa-miR-27a-3p, hsa-miR-27b-3p
LRRC75A-AS1	AR	hsa-miR-124-3p, hsa-miR-205-5p, hsa-miR-320a, hsa-miR-34a-5p
LRRC75A-AS1	TGIF2	hsa-miR-148a-5p, hsa-miR-34a-3p, hsa-miR-34a-5p, hsa-miR-34c-5p, hsa-miR-541-3p
LRRC75A-AS1	RASA1	hsa-miR-21-5p, hsa-miR-31-5p, hsa-miR-335-5p
LRRC75A-AS1	HMGA2	hsa-let-7a-5p, hsa-let-7b-5p, hsa-let-7d-5p, hsa-let-7f-5p, hsa-let-7g-5p, hsa-miR-154-5p, hsa-miR-23b-3p, hsa-miR-33a-5p, hsa-miR-33b-5p
LOXL1-AS1	CCND1	hsa-miR-182-5p, hsa-miR-211-5p, hsa-miR-27a-3p
LOC648987	RUNX3	hsa-miR-106a-5p, hsa-miR-106b-5p, hsa-miR-130a-3p, hsa-miR-130b-3p, hsa-miR-20a-5p, hsa-miR-301a-3p
LOC648987	LY75	hsa-miR-106b-5p, hsa-miR-17-5p, hsa-miR-20a-5p, hsa-miR-93-5p
LOC648987	EPAS1	hsa-miR-17-5p, hsa-miR-185-5p, hsa-miR-20a-5p
LOC648987	DAZAP2	hsa-miR-106b-5p, hsa-miR-17-5p, hsa-miR-20a-5p, hsa-miR-93-5p
LOC648987	CDKN1A	hsa-miR-106a-5p, hsa-miR-106b-5p, hsa-miR-17-5p, hsa-miR-20a-5p, hsa-miR-20b-5p, hsa-miR-93-5p
LOC648987	PPARG	hsa-miR-130a-3p, hsa-miR-130b-3p, hsa-miR-20a-5p, hsa-miR-20b-5p
LOC648987	KAT2B	hsa-miR-106b-5p, hsa-miR-17-5p, hsa-miR-93-5p
LOC648987	STAT3	hsa-miR-106a-5p, hsa-miR-106b-5p, hsa-miR-130b-3p, hsa-miR-17-5p, hsa-miR-20a-5p, hsa-miR-20b-5p
LOC648987	CLIC4	hsa-miR-106b-5p, hsa-miR-17-5p, hsa-miR-20a-5p, hsa-miR-93-5p
LOC100506100	HRAS	hsa-let-7a-5p, hsa-let-7b-5p, hsa-miR-143-3p, hsa-miR-181a-5p
LINC-PINT	FOS	hsa-miR-139-5p, hsa-miR-181a-5p, hsa-miR-7-5p
LINC-PINT	MYC	hsa-miR-135a-5p, hsa-miR-24-3p, hsa-miR-26a-5p, hsa-miR-377-3p
LINC01515	GNAI1	hsa-miR-320a, hsa-miR-320c, hsa-miR-320d
LINC01433	WEE1	hsa-miR-15a-5p, hsa-miR-15b-5p, hsa-miR-16-5p, hsa-miR-195-5p, hsa-miR-497-5p
LINC01433	VEGFA	hsa-miR-15a-5p, hsa-miR-15b-5p, hsa-miR-16-5p, hsa-miR-195-5p
LINC01433	TAB3	hsa-miR-15a-5p, hsa-miR-15b-5p, hsa-miR-16-5p, hsa-miR-195-5p, hsa-miR-497-5p
LINC01433	RPS6KB1	hsa-miR-16-5p, hsa-miR-195-5p, hsa-miR-497-5p
LINC01433	RAF1	hsa-miR-16-5p, hsa-miR-195-5p, hsa-miR-497-5p
LINC01433	CHEK1	hsa-miR-15a-5p, hsa-miR-15b-5p, hsa-miR-16-5p, hsa-miR-195-5p, hsa-miR-497-5p
LINC01420	PHB	hsa-miR-26a-5p, hsa-miR-27a-3p, hsa-miR-27b-3p
LINC01355	PLAG1	hsa-miR-144-3p, hsa-miR-181a-5p, hsa-miR-26a-5p, hsa-miR-27a-3p, hsa-miR-375
LINC01355	VEGFA	hsa-miR-101-3p, hsa-miR-101-5p, hsa-miR-15a-5p, hsa-miR-15b-5p, hsa-miR-16-5p, hsa-miR-181a-5p, hsa-miR-195-5p, hsa-miR-199a-3p, hsa-miR-27b-3p
LINC01355	PURA	hsa-miR-15a-5p, hsa-miR-15b-5p, hsa-miR-16-5p
LINC01355	MTOR	hsa-miR-101-3p, hsa-miR-144-3p, hsa-miR-16-5p, hsa-miR-199a-3p
LINC01355	MCL1	hsa-miR-101-3p, hsa-miR-181a-5p, hsa-miR-26a-5p, hsa-miR-30c-5p
LINC01355	MBNL1	hsa-miR-30a-5p, hsa-miR-30b-5p, hsa-miR-30e-5p
LINC01355	ATM	hsa-miR-101-3p, hsa-miR-101-5p, hsa-miR-181a-5p, hsa-miR-26a-5p, hsa-miR-374a-5p
LINC01355	STMN1	hsa-miR-101-3p, hsa-miR-101-5p, hsa-miR-193b-5p
LINC01355	MBNL2	hsa-miR-30a-5p, hsa-miR-30b-5p, hsa-miR-30e-5p
LINC01355	CTNNB1	hsa-miR-101-3p, hsa-miR-181a-5p, hsa-miR-200a-5p, hsa-miR-375
LINC01314	CCND2	hsa-let-7a-5p, hsa-let-7b-5p, hsa-miR-15a-5p, hsa-miR-16-5p
LINC01314	RET	hsa-miR-15a-5p, hsa-miR-195-5p, hsa-miR-218-5p
LINC01278	DICER1	hsa-let-7a-5p, hsa-miR-103a-3p, hsa-miR-107
LINC01278	SP1	hsa-miR-137, hsa-miR-149-5p, hsa-miR-218-5p, hsa-miR-22-3p, hsa-miR-429
LINC01277	IL13	hsa-let-7d-5p, hsa-let-7f-5p, hsa-let-7g-5p, hsa-let-7i-5p
LINC01277	MPL	hsa-let-7a-5p, hsa-let-7d-5p, hsa-let-7e-5p, hsa-let-7f-5p
LINC01277	LIN28A	hsa-let-7a-5p, hsa-let-7b-5p, hsa-let-7e-5p
LINC01252	SMAD2	hsa-miR-15b-5p, hsa-miR-27a-3p, hsa-miR-27b-3p
LINC01252	PURA	hsa-miR-15a-5p, hsa-miR-15b-5p, hsa-miR-16-5p
LINC01184	MYC	hsa-miR-126-5p, hsa-miR-185-5p, hsa-miR-26a-5p, hsa-miR-29a-3p, hsa-miR-29b-3p
LINC01184	MCL1	hsa-miR-181a-5p, hsa-miR-26a-5p, hsa-miR-29a-3p, hsa-miR-29b-3p, hsa-miR-29c-3p, hsa-miR-30c-5p
LINC01184	PTEN	hsa-miR-181a-5p, hsa-miR-221-3p, hsa-miR-26a-5p, hsa-miR-29a-3p, hsa-miR-29b-3p, hsa-miR-29c-3p
LINC01128	MTOR	hsa-miR-100-5p, hsa-miR-101-3p, hsa-miR-99a-5p, hsa-miR-99b-5p
LINC01128	PHLPP2	hsa-miR-135a-5p, hsa-miR-3127-5p, hsa-miR-32-5p
LINC01128	CASP3	hsa-miR-101-3p, hsa-miR-363-3p, hsa-miR-7-5p
LINC01105	HMGA1	hsa-miR-124-3p, hsa-miR-185-5p, hsa-miR-26a-5p
LINC01105	SOCS1	hsa-miR-19a-3p, hsa-miR-19b-3p, hsa-miR-30b-5p
LINC01102	MCL1	hsa-miR-101-3p, hsa-miR-181a-5p, hsa-miR-30c-5p
LINC01102	BCL2	hsa-miR-135a-5p, hsa-miR-181a-5p, hsa-miR-30b-5p, hsa-miR-34a-5p, hsa-miR-365a-3p, hsa-miR-708-5p
LINC01102	MPL	hsa-let-7a-5p, hsa-let-7d-5p, hsa-let-7e-5p, hsa-let-7f-5p
LINC01091	MBNL3	hsa-miR-30a-5p, hsa-miR-30b-5p, hsa-miR-30e-5p
LINC01091	BCL9	hsa-miR-30a-5p, hsa-miR-30b-5p, hsa-miR-30c-5p, hsa-miR-30d-5p
LINC01091	CASP3	hsa-miR-30c-5p, hsa-miR-30d-5p, hsa-miR-30e-5p
LINC01089	HMGA2	hsa-let-7a-5p, hsa-let-7b-5p, hsa-let-7d-5p, hsa-let-7e-5p, hsa-let-7f-5p, hsa-let-7g-5p, hsa-miR-196a-5p
LINC01089	EZH2	hsa-let-7a-5p, hsa-let-7b-5p, hsa-let-7e-5p, hsa-miR-124-3p
LINC01024	KAT2B	hsa-miR-25-3p, hsa-miR-32-5p, hsa-miR-92a-3p
LINC01004	SMURF1	hsa-miR-140-5p, hsa-miR-15b-5p, hsa-miR-497-5p
LINC01004	IKBKB	hsa-miR-148a-3p, hsa-miR-199a-5p, hsa-miR-218-5p, hsa-miR-28-5p, hsa-miR-497-5p
LINC01004	EZH2	hsa-miR-124-3p, hsa-miR-137, hsa-miR-199a-5p, hsa-miR-26a-5p, hsa-miR-26b-5p, hsa-miR-708-5p
LINC01004	MYB	hsa-miR-103a-3p, hsa-miR-107, hsa-miR-15a-5p, hsa-miR-16-5p, hsa-miR-193b-3p, hsa-miR-195-5p, hsa-miR-424-5p
LINC01004	E2F6	hsa-miR-124-3p, hsa-miR-137, hsa-miR-28-5p
LINC01004	CHEK1	hsa-miR-15a-5p, hsa-miR-15b-5p, hsa-miR-16-5p, hsa-miR-195-5p, hsa-miR-26a-5p, hsa-miR-424-5p, hsa-miR-497-5p
LINC00969	MTDH	hsa-miR-137, hsa-miR-145-5p, hsa-miR-217, hsa-miR-22-3p, hsa-miR-342-3p
LINC00969	ESR1	hsa-miR-130a-3p, hsa-miR-145-5p, hsa-miR-18a-5p, hsa-miR-18b-5p, hsa-miR-19a-3p, hsa-miR-19b-3p, hsa-miR-22-3p
LINC00969	TAB3	hsa-miR-15a-5p, hsa-miR-15b-5p, hsa-miR-16-5p, hsa-miR-195-5p, hsa-miR-342-3p, hsa-miR-497-5p
LINC00969	IKBKB	hsa-miR-148a-3p, hsa-miR-199a-5p, hsa-miR-200b-3p, hsa-miR-200c-3p, hsa-miR-218-5p, hsa-miR-497-5p
LINC00969	MYB	hsa-miR-15a-5p, hsa-miR-16-5p, hsa-miR-195-5p, hsa-miR-200b-3p, hsa-miR-200c-3p, hsa-miR-34a-5p, hsa-miR-429
LINC00963	CDKN2A	hsa-let-7g-5p, hsa-miR-125b-5p, hsa-miR-34a-5p
LINC00963	CASP8	hsa-let-7a-5p, hsa-miR-19b-1-5p, hsa-miR-296-5p
LINC00963	TNFRSF10B	hsa-let-7a-5p, hsa-let-7b-5p, hsa-let-7c-5p, hsa-let-7d-5p, hsa-let-7e-5p, hsa-let-7g-5p
LINC00963	ITGB3	hsa-let-7a-5p, hsa-let-7c-5p, hsa-miR-192-5p, hsa-miR-98-5p
LINC00963	ACVR1	hsa-let-7b-5p, hsa-miR-148a-3p, hsa-miR-148b-3p
LINC00963	PPARA	hsa-miR-130a-3p, hsa-miR-22-3p, hsa-miR-34a-5p, hsa-miR-9-5p
LINC00963	ITGB8	hsa-miR-148a-3p, hsa-miR-17-5p, hsa-miR-19b-1-5p, hsa-miR-93-5p
LINC00963	CSF1	hsa-miR-130a-3p, hsa-miR-148b-3p, hsa-miR-152-3p
LINC00961	TAB3	hsa-miR-15a-5p, hsa-miR-16-5p, hsa-miR-195-5p, hsa-miR-497-5p
LINC00958	MYLIP	hsa-miR-106a-5p, hsa-miR-19b-3p, hsa-miR-20b-5p
LINC00958	ATG16L1	hsa-miR-106b-5p, hsa-miR-20a-5p, hsa-miR-93-5p
LINC00958	PLAG1	hsa-miR-181a-5p, hsa-miR-181b-5p, hsa-miR-27a-3p, hsa-miR-375
LINC00958	ESR1	hsa-miR-130a-3p, hsa-miR-145-5p, hsa-miR-18a-5p, hsa-miR-18b-5p, hsa-miR-19a-3p, hsa-miR-19b-3p, hsa-miR-206, hsa-miR-20b-5p
LINC00958	YOD1	hsa-miR-106b-5p, hsa-miR-146a-5p, hsa-miR-17-5p, hsa-miR-18a-5p, hsa-miR-19a-3p, hsa-miR-19b-3p, hsa-miR-20a-5p, hsa-miR-21-5p, hsa-miR-93-5p
LINC00958	WEE1	hsa-miR-106b-5p, hsa-miR-17-5p, hsa-miR-20a-5p, hsa-miR-27a-3p, hsa-miR-27b-3p, hsa-miR-372-3p
LINC00958	VAC14	hsa-miR-200b-3p, hsa-miR-200c-3p, hsa-miR-429
LINC00958	MAP3K12	hsa-miR-130a-3p, hsa-miR-17-5p, hsa-miR-20a-5p
LINC00958	BCL2	hsa-miR-100-5p, hsa-miR-135a-5p, hsa-miR-17-5p, hsa-miR-181a-5p, hsa-miR-181b-5p, hsa-miR-181c-5p, hsa-miR-181d-5p, hsa-miR-182-5p, hsa-miR-18a-5p, hsa-miR-190b, hsa-miR-200b-3p, hsa-miR-200c-3p, hsa-miR-204-5p, hsa-miR-20a-5p, hsa-miR-211-5p, hsa-miR-21-5p, hsa-miR-33b-5p, hsa-miR-365a-3p, hsa-miR-429, hsa-miR-494-3p, hsa-miR-7-5p, hsa-miR-9-5p
LINC00958	PRKCE	hsa-miR-1-3p, hsa-miR-146a-5p, hsa-miR-31-5p
LINC00894	CUL5	hsa-miR-19a-3p, hsa-miR-19b-3p, hsa-miR-7-5p
LINC00894	PTK2	hsa-miR-135a-5p, hsa-miR-138-5p, hsa-miR-193a-3p, hsa-miR-7-5p
LINC00894	RPS6KB1	hsa-miR-122-5p, hsa-miR-145-5p, hsa-miR-218-5p, hsa-miR-382-5p, hsa-miR-497-5p
LINC00894	NANOG	hsa-miR-128-3p, hsa-miR-134-5p, hsa-miR-145-5p, hsa-miR-150-5p, hsa-miR-34a-5p, hsa-miR-34c-5p
LINC00894	MECP2	hsa-miR-122-5p, hsa-miR-130a-3p, hsa-miR-19a-3p, hsa-miR-30a-3p, hsa-miR-340-5p
LINC00894	SP1	hsa-miR-129-5p, hsa-miR-133b, hsa-miR-145-5p, hsa-miR-149-5p, hsa-miR-150-5p, hsa-miR-218-5p, hsa-miR-24-3p, hsa-miR-324-5p, hsa-miR-326
LINC00894	CCNG2	hsa-miR-340-5p, hsa-miR-34a-5p, hsa-miR-93-3p
LINC00894	ATXN1	hsa-miR-130a-3p, hsa-miR-19a-3p, hsa-miR-19b-3p
LINC00887	RHOC	hsa-miR-106b-5p, hsa-miR-372-3p, hsa-miR-93-5p
LINC00882	TGFB2	hsa-miR-141-3p, hsa-miR-142-5p, hsa-miR-145-5p, hsa-miR-200a-3p, hsa-miR-21-5p
LINC00882	IGF1R	hsa-let-7a-5p, hsa-let-7b-5p, hsa-let-7e-5p, hsa-miR-141-3p, hsa-miR-145-5p, hsa-miR-214-5p, hsa-miR-21-5p, hsa-miR-223-3p
LINC00882	CTNNB1	hsa-miR-200a-3p, hsa-miR-21-5p, hsa-miR-23b-3p, hsa-miR-92a-3p
LINC00839	CCNE1	hsa-miR-15a-5p, hsa-miR-15b-5p, hsa-miR-16-5p, hsa-miR-195-5p
LINC00665	IGF1R	hsa-let-7c-5p, hsa-miR-138-5p, hsa-miR-143-3p, hsa-miR-148a-3p, hsa-miR-185-5p, hsa-miR-335-5p, hsa-miR-885-5p
LINC00665	CREB1	hsa-miR-1224-5p, hsa-miR-182-5p, hsa-miR-204-5p, hsa-miR-27a-3p, hsa-miR-27b-3p
LINC00662	CDK8	hsa-miR-101-3p, hsa-miR-107, hsa-miR-195-5p, hsa-miR-26a-5p
LINC00662	MACC1	hsa-miR-143-3p, hsa-miR-200a-3p, hsa-miR-338-3p, hsa-miR-497-5p
LINC00662	TDG	hsa-miR-26a-5p, hsa-miR-29b-3p, hsa-miR-29c-3p
LINC00662	STMN1	hsa-miR-101-3p, hsa-miR-210-3p, hsa-miR-34a-5p, hsa-miR-9-5p
LINC00662	CREB1	hsa-miR-103a-3p, hsa-miR-122-5p, hsa-miR-27a-3p, hsa-miR-27b-3p, hsa-miR-33b-5p, hsa-miR-433-3p, hsa-miR-582-5p, hsa-miR-9-5p
LINC00662	ATG4C	hsa-miR-34a-5p, hsa-miR-376a-3p, hsa-miR-376b-3p
LINC00649	HMGA2	hsa-let-7a-5p, hsa-let-7c-5p, hsa-miR-98-5p
LINC00641	MAP2K4	hsa-miR-25-3p, hsa-miR-27a-3p, hsa-miR-92a-3p
LINC00641	YAP1	hsa-miR-138-5p, hsa-miR-15a-5p, hsa-miR-16-5p, hsa-miR-195-5p, hsa-miR-27a-3p, hsa-miR-375
LINC00641	PTK2	hsa-miR-135a-5p, hsa-miR-138-5p, hsa-miR-7-5p
LINC00641	CCND2	hsa-let-7a-5p, hsa-let-7b-5p, hsa-miR-124-3p, hsa-miR-15a-5p, hsa-miR-16-5p, hsa-miR-17-5p
LINC00641	SPRY2	hsa-miR-23a-3p, hsa-miR-27a-3p, hsa-miR-27b-3p
LINC00641	SPRED1	hsa-miR-126-5p, hsa-miR-132-3p, hsa-miR-1-3p
LINC00641	SOX6	hsa-miR-132-3p, hsa-miR-1-3p, hsa-miR-16-5p
LINC00641	LDHB	hsa-miR-23a-3p, hsa-miR-24-3p, hsa-miR-375
LINC00641	SOX9	hsa-miR-101-3p, hsa-miR-138-5p, hsa-miR-1-3p, hsa-miR-145-5p
LINC00641	WEE1	hsa-miR-15a-5p, hsa-miR-15b-5p, hsa-miR-16-5p, hsa-miR-17-5p, hsa-miR-195-5p, hsa-miR-221-3p, hsa-miR-27a-3p, hsa-miR-27b-3p, hsa-miR-497-5p
LINC00641	VEGFA	hsa-miR-101-3p, hsa-miR-107, hsa-miR-126-5p, hsa-miR-1-3p, hsa-miR-145-5p, hsa-miR-15a-5p, hsa-miR-15b-5p, hsa-miR-16-5p, hsa-miR-17-5p, hsa-miR-181a-5p, hsa-miR-185-5p, hsa-miR-195-5p, hsa-miR-20b-5p, hsa-miR-23b-3p, hsa-miR-27b-3p, hsa-miR-320a, hsa-miR-34a-5p, hsa-miR-34b-3p, hsa-miR-374b-5p, hsa-miR-378a-3p, hsa-miR-93-5p
LINC00641	TET2	hsa-miR-101-3p, hsa-miR-22-3p, hsa-miR-7-5p
LINC00641	TAB3	hsa-miR-15a-5p, hsa-miR-15b-5p, hsa-miR-16-5p, hsa-miR-195-5p, hsa-miR-222-3p, hsa-miR-23b-3p, hsa-miR-497-5p
LINC00641	RPS6KB1	hsa-miR-145-5p, hsa-miR-16-5p, hsa-miR-195-5p, hsa-miR-382-5p, hsa-miR-497-5p
LINC00641	ROCK2	hsa-miR-124-3p, hsa-miR-135a-5p, hsa-miR-138-5p, hsa-miR-139-5p
LINC00641	RAF1	hsa-miR-132-3p, hsa-miR-139-5p, hsa-miR-16-5p, hsa-miR-195-5p, hsa-miR-497-5p, hsa-miR-7-5p
LINC00641	PURA	hsa-miR-15a-5p, hsa-miR-15b-5p, hsa-miR-16-5p, hsa-miR-93-5p
LINC00641	NOTCH2	hsa-miR-107, hsa-miR-23b-3p, hsa-miR-34a-5p, hsa-miR-9-3p, hsa-miR-9-5p
LINC00641	NFATC3	hsa-miR-185-5p, hsa-miR-30a-3p, hsa-miR-320a
LINC00641	MDM2	hsa-miR-143-3p, hsa-miR-145-5p, hsa-miR-17-5p, hsa-miR-221-3p, hsa-miR-25-3p
LINC00641	MAP3K9	hsa-miR-148b-3p, hsa-miR-24-3p, hsa-miR-34a-5p
LINC00641	IRS2	hsa-let-7b-5p, hsa-miR-135a-5p, hsa-miR-145-5p, hsa-miR-338-3p, hsa-miR-7-5p
LINC00641	HIF1A	hsa-miR-107, hsa-miR-138-5p, hsa-miR-17-5p, hsa-miR-20b-5p, hsa-miR-22-3p, hsa-miR-23b-3p, hsa-miR-27a-3p, hsa-miR-338-3p, hsa-miR-382-5p
LINC00641	DICER1	hsa-let-7a-5p, hsa-miR-103a-3p, hsa-miR-107, hsa-miR-195-5p, hsa-miR-221-3p, hsa-miR-222-3p, hsa-miR-374a-5p, hsa-miR-497-5p, hsa-miR-9-5p
LINC00641	ABCC1	hsa-miR-145-5p, hsa-miR-7-5p, hsa-miR-9-5p
LINC00641	SUZ12	hsa-miR-101-3p, hsa-miR-138-5p, hsa-miR-320a
LINC00641	SP1	hsa-miR-1-3p, hsa-miR-145-5p, hsa-miR-22-3p, hsa-miR-24-3p, hsa-miR-27a-3p, hsa-miR-375
LINC00641	SMAD5	hsa-miR-135a-5p, hsa-miR-222-3p, hsa-miR-23a-3p, hsa-miR-27a-3p
LINC00641	RECK	hsa-miR-15a-5p, hsa-miR-15b-5p, hsa-miR-16-5p, hsa-miR-221-3p, hsa-miR-222-3p, hsa-miR-25-3p, hsa-miR-374b-5p
LINC00641	RBFOX2	hsa-miR-22-3p, hsa-miR-320a, hsa-miR-320b, hsa-miR-320d
LINC00641	PRKCE	hsa-miR-107, hsa-miR-139-5p, hsa-miR-1-3p
LINC00641	PHLPP2	hsa-miR-135a-5p, hsa-miR-181a-5p, hsa-miR-27a-3p, hsa-miR-93-5p
LINC00641	PHLPP1	hsa-miR-15a-5p, hsa-miR-17-5p, hsa-miR-375, hsa-miR-92a-3p
LINC00641	HDAC2	hsa-miR-145-5p, hsa-miR-455-3p, hsa-miR-92a-3p
LINC00641	CTNNB1	hsa-miR-101-3p, hsa-miR-124-3p, hsa-miR-181a-5p, hsa-miR-23b-3p, hsa-miR-320a, hsa-miR-375, hsa-miR-92a-3p
LINC00641	CREB1	hsa-miR-103a-3p, hsa-miR-27a-3p, hsa-miR-27b-3p, hsa-miR-34b-3p, hsa-miR-9-5p
LINC00641	APP	hsa-let-7a-5p, hsa-miR-101-3p, hsa-miR-15a-5p, hsa-miR-16-5p, hsa-miR-17-5p
LINC00511	VEGFA	hsa-miR-27b-3p, hsa-miR-29a-3p, hsa-miR-29b-3p, hsa-miR-29c-3p, hsa-miR-326
LINC00511	ABCA1	hsa-miR-27a-3p, hsa-miR-27b-3p, hsa-miR-33b-5p
LINC00511	TNFAIP3	hsa-miR-29a-3p, hsa-miR-29b-3p, hsa-miR-29c-3p
LINC00511	MMP9	hsa-miR-29b-3p, hsa-miR-377-3p, hsa-miR-9-5p
LINC00511	CASP3	hsa-miR-363-3p, hsa-miR-421, hsa-miR-582-5p
LINC00473	NOTCH2	hsa-miR-107, hsa-miR-23b-3p, hsa-miR-9-5p
LINC00473	GSK3B	hsa-miR-26a-5p, hsa-miR-769-5p, hsa-miR-9-5p
LINC00473	ACTB	hsa-miR-15a-5p, hsa-miR-15b-5p, hsa-miR-16-5p, hsa-miR-497-5p
LINC00472	IGF1R	hsa-let-7a-5p, hsa-let-7b-5p, hsa-let-7e-5p, hsa-miR-143-3p
LINC00461	FOSL1	hsa-miR-33a-5p, hsa-miR-34a-5p, hsa-miR-34c-5p
LINC00324	TCEAL1	hsa-miR-22-3p, hsa-miR-224-5p, hsa-miR-663a
LINC00271	WNT1	hsa-miR-139-5p, hsa-miR-148b-3p, hsa-miR-34a-5p
LINC00265	VEGFA	hsa-miR-106b-5p, hsa-miR-15a-5p, hsa-miR-15b-5p, hsa-miR-16-5p, hsa-miR-195-5p, hsa-miR-20a-5p, hsa-miR-503-5p
LINC00265	E2F3	hsa-miR-106b-5p, hsa-miR-195-5p, hsa-miR-20a-5p, hsa-miR-497-5p, hsa-miR-503-5p
LINC00205	BCL2	hsa-miR-15a-5p, hsa-miR-15b-5p, hsa-miR-16-5p, hsa-miR-195-5p
LINC00202-1	MYC	hsa-miR-129-2-3p, hsa-miR-145-5p, hsa-miR-24-3p
LINC00176	HMGA1	hsa-miR-15a-5p, hsa-miR-16-5p, hsa-miR-195-5p, hsa-miR-296-5p, hsa-miR-625-5p
LINC00176	TGIF2	hsa-miR-148a-3p, hsa-miR-29c-3p, hsa-miR-34a-5p, hsa-miR-34c-5p
LINC00116	ATG16L1	hsa-miR-106b-5p, hsa-miR-20a-5p, hsa-miR-93-5p
LINC00116	TCEAL1	hsa-miR-106b-5p, hsa-miR-17-5p, hsa-miR-20a-5p, hsa-miR-224-5p
LINC00094	BAX	hsa-miR-135a-5p, hsa-miR-15b-5p, hsa-miR-34a-5p, hsa-miR-766-3p
LINC00094	CDK4	hsa-miR-135a-5p, hsa-miR-195-5p, hsa-miR-196a-5p, hsa-miR-34a-5p, hsa-miR-34c-5p, hsa-miR-377-3p, hsa-miR-449a, hsa-miR-449b-5p
LINC00094	BIRC5	hsa-miR-16-5p, hsa-miR-195-5p, hsa-miR-34a-5p
LINC00094	BBC3	hsa-miR-125b-5p, hsa-miR-15a-5p, hsa-miR-16-5p
KRTAP5-AS1	EGFR	hsa-miR-125a-5p, hsa-miR-125b-5p, hsa-miR-135a-5p, hsa-miR-145-5p
KRTAP5-AS1	MCL1	hsa-miR-125a-5p, hsa-miR-125b-5p, hsa-miR-181a-5p, hsa-miR-193b-3p
KRTAP5-AS1	HK2	hsa-miR-125a-5p, hsa-miR-125b-5p, hsa-miR-143-3p, hsa-miR-145-5p
KRTAP5-AS1	BMPR2	hsa-miR-135a-5p, hsa-miR-135b-5p, hsa-miR-181c-5p
KRTAP5-AS1	APC	hsa-miR-125b-5p, hsa-miR-135a-5p, hsa-miR-135b-5p
KLF3-AS1	YAP1	hsa-miR-15a-5p, hsa-miR-16-5p, hsa-miR-195-5p
KLF3-AS1	BCL2	hsa-miR-15a-5p, hsa-miR-15b-5p, hsa-miR-16-5p, hsa-miR-195-5p
KDM4A-AS1	LIMK1	hsa-miR-106a-5p, hsa-miR-17-5p, hsa-miR-20a-5p, hsa-miR-20b-5p
KDM4A-AS1	KLF13	hsa-miR-125a-5p, hsa-miR-125b-5p, hsa-miR-31-5p
KDM4A-AS1	ESR1	hsa-miR-18a-5p, hsa-miR-18b-5p, hsa-miR-20b-5p
KDM4A-AS1	E2F2	hsa-miR-125b-5p, hsa-miR-24-3p, hsa-miR-31-5p
KDM4A-AS1	WEE1	hsa-miR-106b-5p, hsa-miR-17-5p, hsa-miR-20a-5p
KDM4A-AS1	MFN2	hsa-miR-106a-5p, hsa-miR-106b-5p, hsa-miR-17-5p
KDM4A-AS1	MCL1	hsa-miR-106a-5p, hsa-miR-125a-5p, hsa-miR-125b-5p, hsa-miR-20a-5p, hsa-miR-302b-3p
KDM4A-AS1	HDAC4	hsa-miR-125a-5p, hsa-miR-140-5p, hsa-miR-302b-3p, hsa-miR-9-5p
KDM4A-AS1	E2F3	hsa-miR-106b-5p, hsa-miR-125a-5p, hsa-miR-125b-5p, hsa-miR-17-5p, hsa-miR-20a-5p, hsa-miR-217
KDM4A-AS1	E2F1	hsa-miR-106a-5p, hsa-miR-106b-5p, hsa-miR-17-5p, hsa-miR-20a-5p, hsa-miR-302b-3p, hsa-miR-519d-3p, hsa-miR-93-5p
KDM4A-AS1	DNMT1	hsa-miR-140-5p, hsa-miR-17-5p, hsa-miR-185-5p, hsa-miR-18a-5p, hsa-miR-20a-5p, hsa-miR-217
KDM4A-AS1	BCL2L11	hsa-miR-106b-5p, hsa-miR-17-5p, hsa-miR-20a-5p, hsa-miR-24-3p, hsa-miR-9-5p
KDM4A-AS1	ZBTB4	hsa-miR-106b-5p, hsa-miR-17-5p, hsa-miR-93-5p
KDM4A-AS1	MEF2D	hsa-miR-17-5p, hsa-miR-18a-5p, hsa-miR-20a-5p
KDM4A-AS1	CDK2	hsa-miR-17-5p, hsa-miR-20a-5p, hsa-miR-302b-3p
KB-1460A1.5	IRS2	hsa-let-7b-5p, hsa-miR-145-5p, hsa-miR-7-5p
KB-1460A1.5	IGF1R	hsa-let-7a-5p, hsa-let-7b-5p, hsa-miR-145-5p, hsa-miR-185-5p, hsa-miR-320a, hsa-miR-7-5p
KB-1460A1.5	PRDM1	hsa-let-7a-5p, hsa-let-7b-5p, hsa-let-7f-5p, hsa-miR-9-5p
KB-1208A12.3	MGMT	hsa-miR-30d-5p, hsa-miR-409-3p, hsa-miR-429
KANTR	SP1	hsa-miR-145-5p, hsa-miR-29b-3p, hsa-miR-29c-3p
JHDM1D-AS1	MET	hsa-miR-101-3p, hsa-miR-139-5p, hsa-miR-199a-3p, hsa-miR-27a-3p, hsa-miR-27b-3p
JARID2-AS1	FBXW7	hsa-miR-25-3p, hsa-miR-32-5p, hsa-miR-363-3p, hsa-miR-367-3p, hsa-miR-92a-3p
IL10RB-AS1	AKT1	hsa-miR-10b-5p, hsa-miR-196b-5p, hsa-miR-495-3p, hsa-miR-542-3p
HOXC-AS2	SNAI1	hsa-miR-30a-5p, hsa-miR-30b-5p, hsa-miR-30c-5p, hsa-miR-30d-5p, hsa-miR-30e-5p
HOXC-AS1	RAF1	hsa-miR-16-5p, hsa-miR-195-5p, hsa-miR-497-5p
HOXC-AS1	ACTB	hsa-miR-15a-5p, hsa-miR-15b-5p, hsa-miR-16-5p, hsa-miR-497-5p
HNRNPU-AS1	YAP1	hsa-miR-15a-5p, hsa-miR-16-5p, hsa-miR-195-5p, hsa-miR-199a-3p, hsa-miR-27a-3p, hsa-miR-375, hsa-miR-630
HNRNPU-AS1	YOD1	hsa-miR-17-5p, hsa-miR-19a-3p, hsa-miR-19b-3p, hsa-miR-25-3p, hsa-miR-93-5p
HNRNPU-AS1	VEGFA	hsa-miR-101-3p, hsa-miR-107, hsa-miR-126-5p, hsa-miR-145-5p, hsa-miR-15a-5p, hsa-miR-15b-5p, hsa-miR-16-5p, hsa-miR-17-5p, hsa-miR-186-5p, hsa-miR-195-5p, hsa-miR-199a-3p, hsa-miR-199a-5p, hsa-miR-205-5p, hsa-miR-20b-5p, hsa-miR-23b-3p, hsa-miR-27b-3p, hsa-miR-296-5p, hsa-miR-29a-3p, hsa-miR-29b-3p, hsa-miR-29c-3p, hsa-miR-320a, hsa-miR-34a-5p, hsa-miR-361-5p, hsa-miR-93-5p
HNRNPU-AS1	TRAF5	hsa-miR-23b-3p, hsa-miR-26b-5p, hsa-miR-29a-3p
HNRNPU-AS1	TAB3	hsa-miR-15a-5p, hsa-miR-15b-5p, hsa-miR-16-5p, hsa-miR-195-5p, hsa-miR-199a-3p, hsa-miR-23b-3p, hsa-miR-497-5p, hsa-miR-519b-3p, hsa-miR-542-3p
HNRNPU-AS1	SOX5	hsa-miR-132-3p, hsa-miR-15a-5p, hsa-miR-16-5p, hsa-miR-194-5p
HNRNPU-AS1	SMURF1	hsa-miR-15b-5p, hsa-miR-17-5p, hsa-miR-497-5p
HNRNPU-AS1	SMAD2	hsa-miR-132-3p, hsa-miR-145-5p, hsa-miR-15b-5p, hsa-miR-205-5p, hsa-miR-27a-3p, hsa-miR-27b-3p, hsa-miR-425-5p, hsa-miR-484
HNRNPU-AS1	SIAH1	hsa-miR-107, hsa-miR-135a-5p, hsa-miR-424-5p
HNRNPU-AS1	RASAL2	hsa-miR-136-5p, hsa-miR-30b-5p, hsa-miR-30c-5p
HNRNPU-AS1	PURA	hsa-miR-15a-5p, hsa-miR-15b-5p, hsa-miR-16-5p, hsa-miR-93-5p
HNRNPU-AS1	KDM5B	hsa-miR-194-5p, hsa-miR-29a-3p, hsa-miR-424-5p
HNRNPU-AS1	GSK3B	hsa-miR-183-5p, hsa-miR-199a-5p, hsa-miR-224-5p, hsa-miR-26a-5p, hsa-miR-27a-3p, hsa-miR-29a-3p, hsa-miR-29b-3p, hsa-miR-9-5p
HNRNPU-AS1	DICER1	hsa-miR-103a-3p, hsa-miR-107, hsa-miR-130a-3p, hsa-miR-130b-3p, hsa-miR-195-5p, hsa-miR-29a-3p, hsa-miR-497-5p, hsa-miR-9-5p
HNRNPU-AS1	CDC42	hsa-miR-107, hsa-miR-195-5p, hsa-miR-204-5p, hsa-miR-224-5p, hsa-miR-29a-3p, hsa-miR-29b-3p, hsa-miR-29c-3p, hsa-miR-30c-5p
HNRNPU-AS1	BCL2	hsa-miR-135a-5p, hsa-miR-136-5p, hsa-miR-139-5p, hsa-miR-153-3p, hsa-miR-15a-5p, hsa-miR-15b-5p, hsa-miR-16-5p, hsa-miR-17-5p, hsa-miR-195-5p, hsa-miR-204-5p, hsa-miR-205-5p, hsa-miR-224-5p, hsa-miR-24-2-5p, hsa-miR-29a-3p, hsa-miR-29b-3p, hsa-miR-29c-3p, hsa-miR-30b-5p, hsa-miR-34a-5p, hsa-miR-34b-5p, hsa-miR-376c-3p, hsa-miR-448, hsa-miR-497-5p, hsa-miR-630, hsa-miR-9-5p
HNRNPU-AS1	AXIN2	hsa-miR-107, hsa-miR-15b-5p, hsa-miR-16-5p, hsa-miR-34a-5p, hsa-miR-34b-5p
HNRNPU-AS1	PTEN	hsa-miR-103a-3p, hsa-miR-107, hsa-miR-130a-3p, hsa-miR-130b-3p, hsa-miR-153-3p, hsa-miR-17-5p, hsa-miR-19a-3p, hsa-miR-19b-3p, hsa-miR-205-5p, hsa-miR-20b-5p, hsa-miR-23a-3p, hsa-miR-23b-3p, hsa-miR-25-3p, hsa-miR-26a-5p, hsa-miR-26b-5p, hsa-miR-29a-3p, hsa-miR-29b-3p, hsa-miR-29c-3p, hsa-miR-301a-3p, hsa-miR-301b-3p, hsa-miR-320a, hsa-miR-377-3p, hsa-miR-382-5p, hsa-miR-425-5p, hsa-miR-93-5p
HNRNPU-AS1	CLIP1	hsa-miR-17-5p, hsa-miR-19a-3p, hsa-miR-19b-3p, hsa-miR-25-3p, hsa-miR-93-5p
HCP5	ESR1	hsa-miR-145-5p, hsa-miR-18a-5p, hsa-miR-18b-5p, hsa-miR-206, hsa-miR-302c-3p
HCG11	MYLIP	hsa-miR-106a-5p, hsa-miR-19b-3p, hsa-miR-20b-5p
HCG11	MBNL3	hsa-miR-30a-5p, hsa-miR-30b-5p, hsa-miR-30e-5p
HCG11	PLAG1	hsa-miR-144-3p, hsa-miR-26a-5p, hsa-miR-27a-3p, hsa-miR-424-5p
HCG11	YOD1	hsa-miR-17-5p, hsa-miR-18a-5p, hsa-miR-19a-3p, hsa-miR-19b-3p, hsa-miR-93-5p
HCG11	PDCD4	hsa-miR-106a-5p, hsa-miR-182-5p, hsa-miR-320a, hsa-miR-93-5p
HCG11	BCL9	hsa-miR-30a-5p, hsa-miR-30b-5p, hsa-miR-30c-5p, hsa-miR-30d-5p
HCG11	ARID4B	hsa-miR-106a-5p, hsa-miR-19b-3p, hsa-miR-20b-5p
HCG11	CREB1	hsa-miR-150-5p, hsa-miR-182-5p, hsa-miR-204-5p, hsa-miR-27a-3p, hsa-miR-27b-3p, hsa-miR-582-5p
HCG11	ATXN1	hsa-miR-101-3p, hsa-miR-19a-3p, hsa-miR-19b-3p
HAGLR	LY75	hsa-miR-106b-5p, hsa-miR-17-5p, hsa-miR-18a-5p, hsa-miR-19a-3p, hsa-miR-19b-3p, hsa-miR-20a-5p, hsa-miR-93-5p
HAGLR	KAT2B	hsa-miR-106b-5p, hsa-miR-17-5p, hsa-miR-19a-3p, hsa-miR-19b-3p, hsa-miR-93-5p
HAGLR	ESR1	hsa-miR-18a-5p, hsa-miR-18b-5p, hsa-miR-19a-3p, hsa-miR-19b-3p, hsa-miR-20b-5p
HAGLR	STAT3	hsa-miR-106a-5p, hsa-miR-106b-5p, hsa-miR-17-5p, hsa-miR-20a-5p, hsa-miR-20b-5p
HAGLR	RBL1	hsa-miR-106b-5p, hsa-miR-17-5p, hsa-miR-20a-5p
HAGLR	MFN2	hsa-miR-106a-5p, hsa-miR-106b-5p, hsa-miR-17-5p
HAGLR	E2F1	hsa-miR-106a-5p, hsa-miR-106b-5p, hsa-miR-17-5p, hsa-miR-20a-5p, hsa-miR-93-5p
HAGLR	BCL2L11	hsa-miR-106b-5p, hsa-miR-17-5p, hsa-miR-19a-3p, hsa-miR-19b-3p, hsa-miR-20a-5p
HAGLR	TNFAIP3	hsa-miR-18a-5p, hsa-miR-19a-3p, hsa-miR-19b-3p
H1FX-AS1	CDK4	hsa-miR-182-5p, hsa-miR-302a-3p, hsa-miR-486-5p
H19	CCNA1	hsa-let-7b-5p, hsa-miR-302b-3p, hsa-miR-372-3p
H19	DLC1	hsa-miR-200a-3p, hsa-miR-200b-3p, hsa-miR-200c-3p, hsa-miR-429, hsa-miR-483-3p
H19	CTGF	hsa-miR-133b, hsa-miR-143-3p, hsa-miR-145-5p, hsa-miR-18a-5p, hsa-miR-18b-5p, hsa-miR-30c-5p, hsa-miR-483-3p
H19	TIMP3	hsa-miR-103a-3p, hsa-miR-17-3p, hsa-miR-17-5p, hsa-miR-20a-5p, hsa-miR-221-3p, hsa-miR-222-3p
H19	SERPINE1	hsa-miR-10a-5p, hsa-miR-143-3p, hsa-miR-145-5p, hsa-miR-148a-3p, hsa-miR-301a-3p, hsa-miR-30b-5p, hsa-miR-30c-5p, hsa-miR-99a-5p
H19	PDGFRA	hsa-let-7b-5p, hsa-miR-130a-3p, hsa-miR-130b-3p, hsa-miR-140-5p, hsa-miR-146b-5p, hsa-miR-218-5p, hsa-miR-29b-3p
H19	NRP1	hsa-miR-148a-3p, hsa-miR-152-3p, hsa-miR-206, hsa-miR-320a, hsa-miR-338-3p
H19	MMP14	hsa-miR-10a-5p, hsa-miR-133b, hsa-miR-143-3p, hsa-miR-145-5p, hsa-miR-150-5p, hsa-miR-193a-3p, hsa-miR-22-3p, hsa-miR-24-3p
H19	ITGA5	hsa-miR-148a-3p, hsa-miR-148b-3p, hsa-miR-152-3p, hsa-miR-17-3p, hsa-miR-326, hsa-miR-330-5p
H19	FSCN1	hsa-miR-133b, hsa-miR-143-3p, hsa-miR-145-5p, hsa-miR-200b-3p, hsa-miR-24-3p, hsa-miR-326, hsa-miR-429
H19	FN1	hsa-let-7g-5p, hsa-miR-132-3p, hsa-miR-1-3p, hsa-miR-200b-3p, hsa-miR-200c-3p, hsa-miR-206, hsa-miR-29b-3p
H19	FBN1	hsa-miR-29a-3p, hsa-miR-29b-3p, hsa-miR-29c-3p, hsa-miR-486-5p
H19	COL4A1	hsa-miR-17-5p, hsa-miR-20a-5p, hsa-miR-29a-3p, hsa-miR-29b-3p, hsa-miR-29c-3p
H19	COL3A1	hsa-let-7b-5p, hsa-miR-143-3p, hsa-miR-29a-3p, hsa-miR-29b-1-5p, hsa-miR-29b-3p, hsa-miR-29c-3p
H19	COL1A1	hsa-miR-143-3p, hsa-miR-185-5p, hsa-miR-29b-1-5p, hsa-miR-29b-3p, hsa-miR-29c-3p
H19	ADAM12	hsa-miR-200b-3p, hsa-miR-200c-3p, hsa-miR-29a-3p, hsa-miR-29b-3p, hsa-miR-29c-3p, hsa-miR-30b-3p
H19	ACVR1	hsa-let-7b-5p, hsa-miR-148a-3p, hsa-miR-148b-3p, hsa-miR-30c-5p, hsa-miR-365a-3p
H19	TIMP2	hsa-miR-106a-5p, hsa-miR-17-5p, hsa-miR-200c-3p, hsa-miR-20a-5p, hsa-miR-301a-3p, hsa-miR-429, hsa-miR-519d-3p
H19	MAP3K12	hsa-miR-130a-3p, hsa-miR-17-5p, hsa-miR-20a-5p
H19	CDK6	hsa-let-7a-5p, hsa-let-7b-5p, hsa-miR-103a-3p, hsa-miR-105-5p, hsa-miR-107, hsa-miR-129-2-3p, hsa-miR-145-5p, hsa-miR-16-5p, hsa-miR-185-5p, hsa-miR-195-5p, hsa-miR-196a-5p, hsa-miR-200a-3p, hsa-miR-214-5p, hsa-miR-218-5p, hsa-miR-29a-3p, hsa-miR-29b-3p, hsa-miR-29c-3p, hsa-miR-320a, hsa-miR-377-3p, hsa-miR-378a-3p, hsa-miR-424-5p, hsa-miR-491-5p, hsa-miR-494-3p, hsa-miR-497-5p
H19	ZBTB4	hsa-miR-106b-5p, hsa-miR-130b-3p, hsa-miR-17-5p, hsa-miR-19a-3p, hsa-miR-93-5p
H19	RIN2	hsa-miR-141-3p, hsa-miR-200a-3p, hsa-miR-200b-3p, hsa-miR-200c-3p, hsa-miR-429
H19	PTPRD	hsa-miR-141-3p, hsa-miR-200a-3p, hsa-miR-200b-3p, hsa-miR-200c-3p, hsa-miR-429
H19	PRDM1	hsa-let-7a-5p, hsa-let-7b-5p, hsa-let-7f-5p, hsa-miR-125b-5p, hsa-miR-222-3p, hsa-miR-30a-5p, hsa-miR-320c
H19	NCOR2	hsa-miR-100-5p, hsa-miR-10a-5p, hsa-miR-10b-5p, hsa-miR-125b-5p, hsa-miR-16-5p, hsa-miR-30c-5p
H19	MBNL2	hsa-miR-10b-5p, hsa-miR-218-5p, hsa-miR-302d-3p, hsa-miR-30a-5p, hsa-miR-30b-5p, hsa-miR-30e-5p, hsa-miR-372-3p
H19	ITGB8	hsa-miR-145-5p, hsa-miR-148a-3p, hsa-miR-17-5p, hsa-miR-20a-5p, hsa-miR-93-5p
H19	ICAM1	hsa-miR-141-5p, hsa-miR-146a-5p, hsa-miR-17-3p, hsa-miR-17-5p, hsa-miR-221-3p, hsa-miR-222-3p, hsa-miR-296-3p
H19	CLIP1	hsa-miR-106b-5p, hsa-miR-146a-5p, hsa-miR-17-3p, hsa-miR-17-5p, hsa-miR-18a-5p, hsa-miR-19a-3p, hsa-miR-19b-3p, hsa-miR-20a-5p, hsa-miR-93-5p
H19	BCL2L1	hsa-let-7c-5p, hsa-let-7g-5p, hsa-miR-122-5p, hsa-miR-133b, hsa-miR-193a-3p, hsa-miR-324-3p, hsa-miR-326, hsa-miR-491-5p
GUSBP1	MTDH	hsa-miR-217, hsa-miR-22-3p, hsa-miR-320a
GUSBP1	VEGFA	hsa-miR-126-5p, hsa-miR-17-5p, hsa-miR-20b-5p, hsa-miR-320a, hsa-miR-361-5p, hsa-miR-93-5p
GUSBP1	HIF1A	hsa-miR-17-5p, hsa-miR-20b-5p, hsa-miR-22-3p
GS1-124K5.11	YAP1	hsa-miR-15a-5p, hsa-miR-16-5p, hsa-miR-195-5p
GS1-124K5.11	BACE1	hsa-miR-107, hsa-miR-15a-5p, hsa-miR-16-5p
GS1-124K5.11	VEGFA	hsa-miR-107, hsa-miR-15a-5p, hsa-miR-15b-5p, hsa-miR-16-5p, hsa-miR-195-5p
GS1-124K5.11	TAB3	hsa-miR-15a-5p, hsa-miR-15b-5p, hsa-miR-16-5p, hsa-miR-195-5p, hsa-miR-497-5p
GS1-124K5.11	RAF1	hsa-miR-16-5p, hsa-miR-195-5p, hsa-miR-497-5p
GS1-124K5.11	PURA	hsa-miR-15a-5p, hsa-miR-15b-5p, hsa-miR-16-5p
GS1-124K5.11	GSK3B	hsa-miR-183-5p, hsa-miR-346, hsa-miR-96-5p
GS1-124K5.11	DICER1	hsa-miR-103a-3p, hsa-miR-107, hsa-miR-195-5p, hsa-miR-497-5p
GS1-124K5.11	BCL2	hsa-miR-15a-5p, hsa-miR-15b-5p, hsa-miR-16-5p, hsa-miR-195-5p, hsa-miR-497-5p
GS1-124K5.11	AXIN2	hsa-miR-107, hsa-miR-15b-5p, hsa-miR-16-5p
GS1-124K5.11	ACTB	hsa-miR-15a-5p, hsa-miR-15b-5p, hsa-miR-16-5p, hsa-miR-497-5p
GHRLOS	MITF	hsa-miR-182-5p, hsa-miR-218-5p, hsa-miR-96-5p
GATA2-AS1	FGB	hsa-miR-29a-3p, hsa-miR-29b-3p, hsa-miR-29c-3p
GAS5	CUL5	hsa-miR-192-5p, hsa-miR-19a-3p, hsa-miR-19b-3p, hsa-miR-7-5p
GAS5	CCNG1	hsa-miR-122-5p, hsa-miR-1271-5p, hsa-miR-23b-3p, hsa-miR-27b-3p, hsa-miR-9-5p
GAS5	HMGB1	hsa-miR-129-5p, hsa-miR-153-3p, hsa-miR-200a-3p, hsa-miR-205-5p, hsa-miR-21-5p, hsa-miR-22-3p, hsa-miR-320a, hsa-miR-34a-5p
GAS5	YOD1	hsa-miR-155-5p, hsa-miR-17-3p, hsa-miR-18a-5p, hsa-miR-19a-3p, hsa-miR-19b-3p, hsa-miR-21-5p, hsa-miR-25-3p
GAS5	PDCD4	hsa-miR-10b-5p, hsa-miR-155-5p, hsa-miR-182-5p, hsa-miR-200a-3p, hsa-miR-208a-3p, hsa-miR-21-5p, hsa-miR-320a, hsa-miR-499a-5p, hsa-miR-93-3p
GAS5	NANOG	hsa-miR-128-3p, hsa-miR-145-5p, hsa-miR-150-5p, hsa-miR-181a-3p, hsa-miR-34a-5p, hsa-miR-34c-5p
GAS5	MACC1	hsa-miR-143-3p, hsa-miR-200a-3p, hsa-miR-338-3p, hsa-miR-590-3p
GAS5	FBXO11	hsa-miR-155-5p, hsa-miR-21-5p, hsa-miR-543
GAS5	CDK6	hsa-let-7a-5p, hsa-let-7b-5p, hsa-miR-129-5p, hsa-miR-137, hsa-miR-145-5p, hsa-miR-185-5p, hsa-miR-196a-5p, hsa-miR-200a-3p, hsa-miR-214-5p, hsa-miR-26a-5p, hsa-miR-26b-5p, hsa-miR-29a-3p, hsa-miR-29b-3p, hsa-miR-29c-3p, hsa-miR-30a-3p, hsa-miR-320a, hsa-miR-340-5p, hsa-miR-34a-3p, hsa-miR-34a-5p, hsa-miR-34b-5p, hsa-miR-34c-5p, hsa-miR-377-3p, hsa-miR-378a-3p, hsa-miR-449a, hsa-miR-449b-5p, hsa-…
GAS5	CDC42	hsa-miR-137, hsa-miR-185-5p, hsa-miR-216a-5p, hsa-miR-224-5p, hsa-miR-29a-3p, hsa-miR-29b-3p, hsa-miR-29c-3p, hsa-miR-30c-5p
GAS5	TFAM	hsa-miR-155-5p, hsa-miR-199a-3p, hsa-miR-200a-3p, hsa-miR-494-3p
GAS5	TDG	hsa-miR-26a-5p, hsa-miR-29a-3p, hsa-miR-29b-3p, hsa-miR-29c-3p
GAS5	STMN1	hsa-miR-101-3p, hsa-miR-101-5p, hsa-miR-210-3p, hsa-miR-221-3p, hsa-miR-223-3p, hsa-miR-31-5p, hsa-miR-34a-5p, hsa-miR-9-5p
GAS5	SSX2IP	hsa-miR-155-5p, hsa-miR-221-3p, hsa-miR-222-3p, hsa-miR-338-3p
GAS5	SMAD5	hsa-miR-135a-5p, hsa-miR-135b-5p, hsa-miR-155-5p, hsa-miR-222-3p, hsa-miR-23a-3p, hsa-miR-27a-3p
GAS5	PARP1	hsa-let-7a-5p, hsa-miR-216b-5p, hsa-miR-223-3p, hsa-miR-335-5p, hsa-miR-708-5p
GAS5	NRAS	hsa-let-7a-5p, hsa-let-7b-5p, hsa-let-7c-5p, hsa-miR-145-5p, hsa-miR-148b-3p, hsa-miR-181a-5p, hsa-miR-26a-5p, hsa-miR-98-5p
GAS5	MLH1	hsa-miR-148b-3p, hsa-miR-155-5p, hsa-miR-31-5p
GAS5	CSE1L	hsa-miR-137, hsa-miR-138-5p, hsa-miR-139-5p
GAS5	CCNJ	hsa-miR-125b-5p, hsa-miR-205-5p, hsa-miR-98-5p
GAS5	ATG4C	hsa-miR-34a-5p, hsa-miR-376a-3p, hsa-miR-376b-3p
GABPB1-AS1	IGF1R	hsa-miR-139-5p, hsa-miR-143-3p, hsa-miR-145-5p, hsa-miR-185-5p, hsa-miR-26b-5p, hsa-miR-335-5p, hsa-miR-497-5p, hsa-miR-7-1-3p
GABPB1-AS1	ELAVL1	hsa-miR-23c, hsa-miR-519a-3p, hsa-miR-519b-3p, hsa-miR-519c-3p, hsa-miR-9-5p
GABPB1-AS1	E2F3	hsa-miR-106b-5p, hsa-miR-145-5p, hsa-miR-17-5p, hsa-miR-20a-5p, hsa-miR-377-3p, hsa-miR-497-5p
GABPB1-AS1	SP1	hsa-miR-137, hsa-miR-145-5p, hsa-miR-149-5p, hsa-miR-150-5p, hsa-miR-24-3p, hsa-miR-27a-3p, hsa-miR-335-5p
FZD10-AS1	BCL2	hsa-miR-153-3p, hsa-miR-448, hsa-miR-9-5p
FTX	MBNL3	hsa-miR-30a-5p, hsa-miR-30b-5p, hsa-miR-30e-5p
FTX	CUL5	hsa-miR-19a-3p, hsa-miR-19b-3p, hsa-miR-7-5p
FTX	PPP1R13B	hsa-miR-29a-3p, hsa-miR-29b-3p, hsa-miR-29c-3p
FTX	PKNOX1	hsa-miR-17-5p, hsa-miR-19a-3p, hsa-miR-19b-3p
FTX	YAP1	hsa-miR-138-5p, hsa-miR-15a-5p, hsa-miR-16-5p, hsa-miR-195-5p, hsa-miR-199a-3p
FTX	SPRED1	hsa-miR-126-5p, hsa-miR-132-3p, hsa-miR-31-5p
FTX	NUMB	hsa-let-7c-5p, hsa-miR-146a-5p, hsa-miR-31-5p
FTX	NFIA	hsa-miR-107, hsa-miR-181b-5p, hsa-miR-29a-3p, hsa-miR-382-5p, hsa-miR-424-5p
FTX	ESR1	hsa-miR-19a-3p, hsa-miR-19b-3p, hsa-miR-20b-5p, hsa-miR-221-3p, hsa-miR-222-3p, hsa-miR-22-3p, hsa-miR-29a-3p, hsa-miR-29b-3p
FTX	AR	hsa-miR-124-3p, hsa-miR-185-5p, hsa-miR-205-5p, hsa-miR-320a
FTX	WEE1	hsa-miR-128-3p, hsa-miR-15a-5p, hsa-miR-16-5p, hsa-miR-17-5p, hsa-miR-195-5p, hsa-miR-221-3p, hsa-miR-424-5p
FTX	TET2	hsa-miR-125b-5p, hsa-miR-22-3p, hsa-miR-29a-3p, hsa-miR-29b-3p, hsa-miR-29c-3p, hsa-miR-7-5p
FTX	TAB3	hsa-miR-15a-5p, hsa-miR-16-5p, hsa-miR-195-5p, hsa-miR-199a-3p, hsa-miR-222-3p, hsa-miR-30a-5p, hsa-miR-542-3p
FTX	SOX5	hsa-miR-132-3p, hsa-miR-15a-5p, hsa-miR-16-5p
FTX	SMAD2	hsa-let-7g-5p, hsa-miR-125a-5p, hsa-miR-128-3p, hsa-miR-132-3p, hsa-miR-146a-5p, hsa-miR-205-5p, hsa-miR-212-3p, hsa-miR-425-5p
FTX	MXD1	hsa-miR-125b-5p, hsa-miR-138-5p, hsa-miR-19a-3p, hsa-miR-19b-3p, hsa-miR-382-5p
FTX	MECP2	hsa-miR-124-3p, hsa-miR-181c-5p, hsa-miR-19a-3p, hsa-miR-212-3p, hsa-miR-340-5p
FTX	MDM2	hsa-miR-143-3p, hsa-miR-17-5p, hsa-miR-221-3p, hsa-miR-25-3p, hsa-miR-32-5p, hsa-miR-340-5p, hsa-miR-367-3p, hsa-miR-410-3p
FTX	ITGB1	hsa-miR-124-3p, hsa-miR-143-3p, hsa-miR-183-5p, hsa-miR-29a-3p, hsa-miR-29b-3p, hsa-miR-29c-3p, hsa-miR-9-3p
FTX	HIPK3	hsa-miR-19b-3p, hsa-miR-20b-5p, hsa-miR-92a-3p
FTX	HDAC4	hsa-miR-125a-5p, hsa-miR-140-5p, hsa-miR-22-3p, hsa-miR-29b-3p, hsa-miR-30c-5p, hsa-miR-9-5p
FTX	ELAVL1	hsa-miR-125a-5p, hsa-miR-146a-5p, hsa-miR-23c, hsa-miR-29b-3p, hsa-miR-9-5p
FTX	CDC42	hsa-miR-107, hsa-miR-185-5p, hsa-miR-195-5p, hsa-miR-216a-5p, hsa-miR-29a-3p, hsa-miR-29b-3p, hsa-miR-29c-3p, hsa-miR-30c-5p, hsa-miR-330-3p
FTX	CBL	hsa-miR-124-3p, hsa-miR-150-5p, hsa-miR-216a-5p, hsa-miR-98-5p
FTX	BMPR2	hsa-miR-17-5p, hsa-miR-181c-5p, hsa-miR-19a-3p, hsa-miR-19b-3p, hsa-miR-92a-3p
FTX	BCL9	hsa-miR-30a-5p, hsa-miR-30b-5p, hsa-miR-30c-5p, hsa-miR-30d-5p
FTX	BCL2	hsa-miR-125a-5p, hsa-miR-125b-5p, hsa-miR-139-5p, hsa-miR-143-3p, hsa-miR-15a-5p, hsa-miR-16-5p, hsa-miR-17-5p, hsa-miR-181a-5p, hsa-miR-181b-5p, hsa-miR-181c-5p, hsa-miR-181d-5p, hsa-miR-190b, hsa-miR-195-5p, hsa-miR-205-5p, hsa-miR-29a-3p, hsa-miR-29b-3p, hsa-miR-29c-3p, hsa-miR-30b-5p, hsa-miR-365a-3p, hsa-miR-494-3p, hsa-miR-7-5p, hsa-miR-9-5p, hsa-miR-98-5p
FTX	BACH1	hsa-miR-146a-5p, hsa-miR-17-5p, hsa-miR-196a-5p, hsa-miR-19a-3p, hsa-miR-19b-3p, hsa-miR-25-3p, hsa-miR-93-5p
FTX	ARID4B	hsa-miR-19b-3p, hsa-miR-20b-5p, hsa-miR-92a-3p
FTX	ABL1	hsa-miR-29a-3p, hsa-miR-29b-3p, hsa-miR-30a-5p
FTX	TET1	hsa-miR-29a-3p, hsa-miR-29b-3p, hsa-miR-30a-5p
FTX	SUZ12	hsa-miR-128-3p, hsa-miR-138-5p, hsa-miR-19a-3p, hsa-miR-320a
FTX	PTEN	hsa-miR-103a-3p, hsa-miR-107, hsa-miR-128-3p, hsa-miR-142-5p, hsa-miR-144-3p, hsa-miR-17-5p, hsa-miR-181a-5p, hsa-miR-181b-5p, hsa-miR-181c-5p, hsa-miR-190b, hsa-miR-19a-3p, hsa-miR-19b-3p, hsa-miR-205-5p, hsa-miR-20b-5p, hsa-miR-216a-5p, hsa-miR-217, hsa-miR-221-3p, hsa-miR-222-3p, hsa-miR-22-3p, hsa-miR-25-3p, hsa-miR-29a-3p, hsa-miR-29b-3p, hsa-miR-29c-3p, hsa-miR-320a, hsa-miR-32-5p, hsa-miR-…
FTX	PRKCE	hsa-miR-107, hsa-miR-139-5p, hsa-miR-146a-5p, hsa-miR-31-5p
FTX	CREB1	hsa-miR-103a-3p, hsa-miR-150-5p, hsa-miR-181b-5p, hsa-miR-363-3p, hsa-miR-433-3p, hsa-miR-9-5p
FTX	APP	hsa-let-7a-5p, hsa-let-7d-5p, hsa-miR-144-3p, hsa-miR-15a-5p, hsa-miR-16-5p, hsa-miR-17-5p
FOXG1-AS1	CDC42	hsa-miR-29a-3p, hsa-miR-29b-3p, hsa-miR-29c-3p
FGD5-AS1	SOCS6	hsa-miR-155-5p, hsa-miR-17-5p, hsa-miR-183-5p, hsa-miR-21-5p, hsa-miR-424-5p
FGD5-AS1	VHL	hsa-miR-101-3p, hsa-miR-155-5p, hsa-miR-21-5p, hsa-miR-23b-3p, hsa-miR-424-5p
FGD5-AS1	LEF1	hsa-miR-218-5p, hsa-miR-27a-3p, hsa-miR-34a-5p, hsa-miR-449a, hsa-miR-452-5p
FGD5-AS1	TGFBR2	hsa-miR-106a-5p, hsa-miR-130a-3p, hsa-miR-142-5p, hsa-miR-145-5p, hsa-miR-17-5p, hsa-miR-18a-5p, hsa-miR-196a-5p, hsa-miR-196b-5p, hsa-miR-19a-3p, hsa-miR-19b-3p, hsa-miR-202-5p, hsa-miR-20a-5p, hsa-miR-21-5p, hsa-miR-27a-3p, hsa-miR-302b-3p, hsa-miR-302d-3p, hsa-miR-34b-5p, hsa-miR-372-3p, hsa-miR-373-3p, hsa-miR-520a-3p, hsa-miR-590-5p, hsa-miR-92a-3p, hsa-miR-93-5p, hsa-miR-9-5p
FGD5-AS1	PRKAA1	hsa-miR-137, hsa-miR-19b-3p, hsa-miR-33a-5p, hsa-miR-451a, hsa-miR-9-5p
FGD5-AS1	ALDH5A1	hsa-miR-147b, hsa-miR-210-3p, hsa-miR-29a-3p
FGD5-AS1	REST	hsa-miR-124-3p, hsa-miR-20a-5p, hsa-miR-21-5p, hsa-miR-9-5p
FGD5-AS1	RAF1	hsa-miR-132-3p, hsa-miR-139-5p, hsa-miR-16-5p, hsa-miR-195-5p, hsa-miR-497-5p, hsa-miR-7-5p
FGD5-AS1	RAB5A	hsa-miR-101-3p, hsa-miR-130a-3p, hsa-miR-451a
FGD5-AS1	PURA	hsa-miR-106b-5p, hsa-miR-15a-5p, hsa-miR-15b-5p, hsa-miR-16-5p, hsa-miR-20a-5p, hsa-miR-93-5p
FGD5-AS1	MAP3K12	hsa-miR-130a-3p, hsa-miR-17-5p, hsa-miR-20a-5p
FGD5-AS1	ITPR1	hsa-miR-34c-5p, hsa-miR-424-5p, hsa-miR-448, hsa-miR-449a, hsa-miR-494-3p
FGD5-AS1	IKBKB	hsa-miR-132-3p, hsa-miR-148a-3p, hsa-miR-218-5p, hsa-miR-28-5p, hsa-miR-451a, hsa-miR-497-5p, hsa-miR-503-5p
FGD5-AS1	BCL2	hsa-miR-136-5p, hsa-miR-139-5p, hsa-miR-141-3p, hsa-miR-143-3p, hsa-miR-148a-3p, hsa-miR-153-3p, hsa-miR-15a-5p, hsa-miR-15b-5p, hsa-miR-16-5p, hsa-miR-17-5p, hsa-miR-181a-5p, hsa-miR-181b-5p, hsa-miR-181d-5p, hsa-miR-184, hsa-miR-18a-5p, hsa-miR-192-5p, hsa-miR-195-5p, hsa-miR-205-5p, hsa-miR-20a-5p, hsa-miR-21-5p, hsa-miR-223-3p, hsa-miR-224-5p, hsa-miR-29a-3p, hsa-miR-30b-5p, hsa-miR-33b-5p, h…
FGD5-AS1	ATG7	hsa-miR-106a-5p, hsa-miR-210-3p, hsa-miR-34a-5p
FGD5-AS1	PTEN	hsa-miR-103a-3p, hsa-miR-106a-5p, hsa-miR-106b-5p, hsa-miR-107, hsa-miR-10a-5p, hsa-miR-10b-5p, hsa-miR-130a-3p, hsa-miR-130b-3p, hsa-miR-141-3p, hsa-miR-142-5p, hsa-miR-144-3p, hsa-miR-153-3p, hsa-miR-155-5p, hsa-miR-17-5p, hsa-miR-181a-5p, hsa-miR-181b-5p, hsa-miR-18a-5p, hsa-miR-19a-3p, hsa-miR-19b-3p, hsa-miR-200a-3p, hsa-miR-205-5p, hsa-miR-20a-5p, hsa-miR-20b-5p, hsa-miR-21-5p, hsa-miR-216a…
FGD5-AS1	MLH1	hsa-miR-148b-3p, hsa-miR-155-5p, hsa-miR-31-5p
FGD5-AS1	MEIS1	hsa-miR-101-3p, hsa-miR-155-5p, hsa-miR-196b-5p, hsa-miR-495-3p
FGD5-AS1	CPEB2	hsa-miR-210-3p, hsa-miR-26a-5p, hsa-miR-92a-3p
FBXL19-AS1	NLK	hsa-miR-181a-5p, hsa-miR-181b-5p, hsa-miR-181c-5p
FAM83H-AS1	CCND1	hsa-miR-15a-5p, hsa-miR-15b-5p, hsa-miR-16-5p, hsa-miR-182-5p, hsa-miR-195-5p, hsa-miR-24-3p, hsa-miR-424-5p, hsa-miR-497-5p, hsa-miR-7-5p
FAM83H-AS1	BACE1	hsa-miR-107, hsa-miR-15a-5p, hsa-miR-16-5p
FAM83H-AS1	PLAG1	hsa-miR-107, hsa-miR-181a-5p, hsa-miR-424-5p
FAM83H-AS1	NOTCH1	hsa-miR-181a-5p, hsa-miR-23b-3p, hsa-miR-24-3p, hsa-miR-30b-5p, hsa-miR-30c-5p, hsa-miR-30d-5p, hsa-miR-30e-5p
FAM83H-AS1	FASN	hsa-miR-195-5p, hsa-miR-30c-5p, hsa-miR-424-5p
FAM66C	YAP1	hsa-miR-15a-5p, hsa-miR-16-5p, hsa-miR-195-5p
FAM66C	WEE1	hsa-miR-15a-5p, hsa-miR-15b-5p, hsa-miR-16-5p, hsa-miR-195-5p, hsa-miR-497-5p
FAM66C	DICER1	hsa-miR-103a-3p, hsa-miR-107, hsa-miR-195-5p, hsa-miR-497-5p
FAM66C	BCL2	hsa-miR-15a-5p, hsa-miR-15b-5p, hsa-miR-16-5p, hsa-miR-195-5p, hsa-miR-497-5p
FAM66C	AXIN2	hsa-miR-107, hsa-miR-15b-5p, hsa-miR-16-5p
FAM66C	CDK4	hsa-miR-195-5p, hsa-miR-24-3p, hsa-miR-377-3p, hsa-miR-497-5p
FAM66C	BRCA1	hsa-miR-15a-5p, hsa-miR-16-5p, hsa-miR-24-3p
ERVK3-1	HMGB1	hsa-miR-129-5p, hsa-miR-205-5p, hsa-miR-34a-5p
ERVK3-1	PAK4	hsa-miR-145-5p, hsa-miR-199a-3p, hsa-miR-199b-3p
ERVK3-1	UBE2F	hsa-miR-129-2-3p, hsa-miR-129-5p, hsa-miR-335-5p
ERVK3-1	SSSCA1	hsa-miR-196a-5p, hsa-miR-221-5p, hsa-miR-222-5p
ERVK3-1	BAX	hsa-miR-122-5p, hsa-miR-34a-5p, hsa-miR-7-5p, hsa-miR-766-3p
ERVK3-1	STMN1	hsa-miR-101-3p, hsa-miR-193b-5p, hsa-miR-34a-5p
ERVK3-1	CDK4	hsa-miR-122-5p, hsa-miR-145-5p, hsa-miR-196a-5p, hsa-miR-34a-5p, hsa-miR-34c-5p, hsa-miR-449a, hsa-miR-449b-5p
ERVK3-1	CCNE2	hsa-miR-30b-5p, hsa-miR-34a-5p, hsa-miR-34c-5p, hsa-miR-449a, hsa-miR-449b-5p
EPB41L4A-AS1	ERBB4	hsa-miR-302b-3p, hsa-miR-302d-3p, hsa-miR-372-3p
EPB41L4A-AS1	MAP3K1	hsa-miR-23b-3p, hsa-miR-302a-3p, hsa-miR-302b-3p, hsa-miR-302d-3p
EPB41L4A-AS1	LY75	hsa-miR-106b-5p, hsa-miR-17-5p, hsa-miR-18a-5p, hsa-miR-20a-5p, hsa-miR-93-5p
EPB41L4A-AS1	NFIA	hsa-miR-181b-5p, hsa-miR-223-3p, hsa-miR-302b-3p, hsa-miR-424-5p
EPB41L4A-AS1	YOD1	hsa-miR-106b-5p, hsa-miR-17-5p, hsa-miR-18a-5p, hsa-miR-20a-5p, hsa-miR-93-5p
EPB41L4A-AS1	SIRT1	hsa-miR-181a-5p, hsa-miR-181b-5p, hsa-miR-181c-5p, hsa-miR-23b-3p, hsa-miR-373-3p, hsa-miR-520c-3p
EPB41L4A-AS1	PURA	hsa-miR-106b-5p, hsa-miR-20a-5p, hsa-miR-93-5p
EPB41L4A-AS1	PDCD4	hsa-miR-106a-5p, hsa-miR-181b-5p, hsa-miR-200a-3p, hsa-miR-93-5p
EPB41L4A-AS1	MAP3K12	hsa-miR-130a-3p, hsa-miR-17-5p, hsa-miR-20a-5p
EPB41L4A-AS1	ATM	hsa-miR-106a-5p, hsa-miR-181a-5p, hsa-miR-181b-5p, hsa-miR-18a-5p, hsa-miR-223-3p, hsa-miR-374a-5p
EPB41L4A-AS1	PTEN	hsa-miR-106a-5p, hsa-miR-106b-5p, hsa-miR-130a-3p, hsa-miR-130a-5p, hsa-miR-130b-3p, hsa-miR-141-3p, hsa-miR-17-5p, hsa-miR-181a-5p, hsa-miR-181b-5p, hsa-miR-181c-5p, hsa-miR-18a-5p, hsa-miR-200a-3p, hsa-miR-20a-5p, hsa-miR-20b-5p, hsa-miR-23a-3p, hsa-miR-23b-3p, hsa-miR-301a-3p, hsa-miR-301b-3p, hsa-miR-302a-3p, hsa-miR-425-5p, hsa-miR-519d-3p, hsa-miR-93-5p
EPB41L4A-AS1	MBNL2	hsa-miR-302d-3p, hsa-miR-30b-5p, hsa-miR-372-3p
EPB41L4A-AS1	FOXO3	hsa-miR-223-3p, hsa-miR-23a-3p, hsa-miR-30c-5p, hsa-miR-93-5p
ENTPD1-AS1	GSK3B	hsa-miR-199a-5p, hsa-miR-224-5p, hsa-miR-26a-5p, hsa-miR-27a-3p
ENTPD1-AS1	ATM	hsa-miR-106a-5p, hsa-miR-223-3p, hsa-miR-26a-5p
EMX2OS	CCND1	hsa-let-7b-5p, hsa-let-7e-5p, hsa-let-7f-5p, hsa-miR-19a-3p, hsa-miR-34a-5p, hsa-miR-490-3p, hsa-miR-9-5p
EMX2OS	HMGB1	hsa-miR-218-5p, hsa-miR-320a, hsa-miR-34a-5p
EMX2OS	AR	hsa-miR-124-3p, hsa-miR-320a, hsa-miR-34a-5p
EMX2OS	PDCD4	hsa-miR-21-3p, hsa-miR-320a, hsa-miR-330-3p
EMX2OS	HMGA2	hsa-let-7b-5p, hsa-let-7c-5p, hsa-let-7d-5p, hsa-let-7e-5p, hsa-let-7f-5p, hsa-miR-33a-5p, hsa-miR-33b-5p, hsa-miR-490-3p, hsa-miR-98-5p
EMX2OS	CDK6	hsa-let-7b-5p, hsa-miR-124-3p, hsa-miR-129-2-3p, hsa-miR-218-5p, hsa-miR-320a, hsa-miR-34a-5p
EMX2OS	MYCN	hsa-let-7e-5p, hsa-miR-19a-3p, hsa-miR-19b-3p, hsa-miR-34a-5p
EMX2OS	CDH2	hsa-miR-124-3p, hsa-miR-218-5p, hsa-miR-34a-5p
EIF3J-AS1	CCND1	hsa-miR-152-3p, hsa-miR-15a-5p, hsa-miR-15b-5p, hsa-miR-16-5p, hsa-miR-195-5p, hsa-miR-9-5p
EIF3J-AS1	TP53	hsa-miR-150-5p, hsa-miR-15a-5p, hsa-miR-16-5p, hsa-miR-205-5p, hsa-miR-300
EIF3J-AS1	E2F5	hsa-miR-154-5p, hsa-miR-181a-5p, hsa-miR-205-5p
EIF3J-AS1	PURA	hsa-miR-15a-5p, hsa-miR-15b-5p, hsa-miR-16-5p
EIF3J-AS1	MGMT	hsa-miR-181b-5p, hsa-miR-181d-5p, hsa-miR-409-3p
EIF3J-AS1	IGF1R	hsa-miR-133b, hsa-miR-139-5p, hsa-miR-148a-3p, hsa-miR-152-3p, hsa-miR-16-5p, hsa-miR-181b-5p
DNAJC3-AS1	RNF2	hsa-miR-181a-5p, hsa-miR-200b-3p, hsa-miR-200c-3p
DNAJC3-AS1	CREB1	hsa-miR-200b-3p, hsa-miR-582-5p, hsa-miR-9-5p
DLX6-AS1	KLF4	hsa-miR-103a-3p, hsa-miR-107, hsa-miR-135a-5p, hsa-miR-145-5p, hsa-miR-15a-5p, hsa-miR-29a-3p, hsa-miR-29c-3p, hsa-miR-7-5p
DLX6-AS1	TGFBR1	hsa-let-7b-5p, hsa-let-7g-5p, hsa-miR-181a-5p, hsa-miR-27b-3p
DLX6-AS1	LIN28B	hsa-let-7a-5p, hsa-let-7b-5p, hsa-miR-26a-5p
DLX6-AS1	HOXA10	hsa-miR-135a-5p, hsa-miR-27a-3p, hsa-miR-320a
DLX6-AS1	PAK1	hsa-let-7a-5p, hsa-miR-145-5p, hsa-miR-221-3p, hsa-miR-30c-5p, hsa-miR-7-5p
DLX6-AS1	NOTCH1	hsa-miR-181a-5p, hsa-miR-24-3p, hsa-miR-27b-3p, hsa-miR-30b-5p, hsa-miR-30c-5p, hsa-miR-9-5p
DLX6-AS1	IGF2BP1	hsa-let-7a-5p, hsa-let-7b-5p, hsa-let-7g-5p, hsa-miR-9-5p
DLX6-AS1	CCNA2	hsa-let-7b-5p, hsa-miR-132-3p, hsa-miR-22-3p, hsa-miR-24-3p, hsa-miR-27b-3p
DLX6-AS1	AURKB	hsa-let-7a-5p, hsa-let-7i-5p, hsa-miR-24-3p
DLX6-AS1	MDM2	hsa-miR-143-3p, hsa-miR-145-5p, hsa-miR-17-5p, hsa-miR-221-3p, hsa-miR-26a-5p
DLX6-AS1	KRAS	hsa-let-7a-5p, hsa-let-7f-5p, hsa-let-7g-5p, hsa-miR-1-3p, hsa-miR-143-3p, hsa-miR-16-5p, hsa-miR-181a-5p, hsa-miR-27a-3p, hsa-miR-365a-3p
DLX6-AS1	GSK3B	hsa-miR-26a-5p, hsa-miR-27a-3p, hsa-miR-29a-3p, hsa-miR-29b-3p, hsa-miR-9-5p
DLX6-AS1	E2F1	hsa-let-7a-5p, hsa-miR-124-3p, hsa-miR-135a-5p, hsa-miR-17-5p, hsa-miR-93-5p, hsa-miR-9-3p
DLX6-AS1	DNMT3B	hsa-miR-124-3p, hsa-miR-26a-5p, hsa-miR-29a-3p, hsa-miR-29b-3p, hsa-miR-29c-3p
DLX6-AS1	ABCC1	hsa-miR-145-5p, hsa-miR-7-5p, hsa-miR-9-5p
DLX6-AS1	UHRF1	hsa-let-7a-5p, hsa-miR-124-3p, hsa-miR-9-5p
DLX6-AS1	TDG	hsa-miR-26a-5p, hsa-miR-29a-3p, hsa-miR-29b-3p, hsa-miR-29c-3p
DLX6-AS1	ROCK1	hsa-miR-124-3p, hsa-miR-135a-5p, hsa-miR-145-5p, hsa-miR-148b-3p
DLX6-AS1	PPM1D	hsa-miR-145-5p, hsa-miR-15b-5p, hsa-miR-16-5p, hsa-miR-29a-3p
DLX6-AS1	LIN28A	hsa-let-7a-5p, hsa-let-7b-5p, hsa-miR-107
DLX6-AS1	E2F6	hsa-let-7a-5p, hsa-miR-124-3p, hsa-miR-27a-3p
DLX6-AS1	DNMT3A	hsa-miR-143-3p, hsa-miR-29a-3p, hsa-miR-29b-3p, hsa-miR-29c-3p
DLX6-AS1	CDK2	hsa-miR-103a-3p, hsa-miR-124-3p, hsa-miR-135a-5p, hsa-miR-17-5p, hsa-miR-29a-3p
DLX6-AS1	BRCA1	hsa-miR-15a-5p, hsa-miR-16-5p, hsa-miR-20b-5p, hsa-miR-24-3p
DLEU2	RHOA	hsa-miR-101-3p, hsa-miR-200b-3p, hsa-miR-200c-3p, hsa-miR-340-5p, hsa-miR-375
DLEU2	CDK8	hsa-miR-101-3p, hsa-miR-107, hsa-miR-195-5p
DLEU2	ZEB1	hsa-miR-101-3p, hsa-miR-144-3p, hsa-miR-150-5p, hsa-miR-200b-3p, hsa-miR-200c-3p, hsa-miR-429, hsa-miR-655-3p
DLEU2	SEC23A	hsa-miR-200b-3p, hsa-miR-200c-3p, hsa-miR-375
DLEU2	E2F2	hsa-let-7b-5p, hsa-miR-125b-5p, hsa-miR-214-5p, hsa-miR-218-5p
DLEU2	WEE1	hsa-miR-128-3p, hsa-miR-15a-5p, hsa-miR-15b-5p, hsa-miR-16-5p, hsa-miR-195-5p, hsa-miR-424-5p, hsa-miR-497-5p, hsa-miR-503-5p
DLEU2	TAB3	hsa-miR-15a-5p, hsa-miR-15b-5p, hsa-miR-16-5p, hsa-miR-195-5p, hsa-miR-199a-3p, hsa-miR-497-5p
DLEU2	RPS6KB1	hsa-miR-16-5p, hsa-miR-195-5p, hsa-miR-200c-3p, hsa-miR-218-5p, hsa-miR-497-5p
DLEU2	RICTOR	hsa-let-7c-5p, hsa-miR-128-3p, hsa-miR-16-5p, hsa-miR-218-5p
DLEU2	MTOR	hsa-let-7c-5p, hsa-miR-101-3p, hsa-miR-125a-5p, hsa-miR-128-3p, hsa-miR-144-3p, hsa-miR-16-5p, hsa-miR-199a-3p, hsa-miR-497-5p
DLEU2	JAK2	hsa-miR-101-3p, hsa-miR-125a-5p, hsa-miR-125b-5p, hsa-miR-204-5p, hsa-miR-375
DLEU2	EZH2	hsa-let-7b-5p, hsa-miR-101-3p, hsa-miR-144-3p, hsa-miR-200b-3p, hsa-miR-429
DLEU2	ETS1	hsa-miR-125b-5p, hsa-miR-144-3p, hsa-miR-200b-3p, hsa-miR-200c-3p, hsa-miR-506-3p
DLEU2	ERBB2IP	hsa-miR-200b-3p, hsa-miR-200c-3p, hsa-miR-429
DLEU2	DICER1	hsa-let-7c-5p, hsa-miR-103a-3p, hsa-miR-107, hsa-miR-154-5p, hsa-miR-195-5p, hsa-miR-200c-3p, hsa-miR-3928-3p, hsa-miR-497-5p
DLEU2	SP1	hsa-miR-129-5p, hsa-miR-150-5p, hsa-miR-200b-3p, hsa-miR-200c-3p, hsa-miR-218-5p, hsa-miR-33a-5p, hsa-miR-375, hsa-miR-429
DLEU2	2018-09-07	hsa-miR-200b-3p, hsa-miR-200c-3p, hsa-miR-429
DLEU2	RECK	hsa-miR-15a-5p, hsa-miR-15b-5p, hsa-miR-16-5p, hsa-miR-182-5p
DLEU2	KLHL20	hsa-miR-200b-3p, hsa-miR-200c-3p, hsa-miR-429
DLEU2	KDR	hsa-miR-15b-5p, hsa-miR-16-5p, hsa-miR-195-5p, hsa-miR-199a-3p, hsa-miR-19b-1-5p, hsa-miR-200b-3p, hsa-miR-200c-3p
DLEU2	CHEK1	hsa-miR-15a-5p, hsa-miR-15b-5p, hsa-miR-16-5p, hsa-miR-195-5p, hsa-miR-424-5p, hsa-miR-497-5p, hsa-miR-503-5p
DLEU2	CDC25A	hsa-let-7b-5p, hsa-let-7c-5p, hsa-miR-15a-5p, hsa-miR-195-5p, hsa-miR-424-5p, hsa-miR-497-5p, hsa-miR-503-5p
DLEU2	BIRC5	hsa-miR-150-5p, hsa-miR-16-5p, hsa-miR-195-5p, hsa-miR-218-5p, hsa-miR-497-5p
DIO3OS	MMP2	hsa-miR-143-3p, hsa-miR-145-5p, hsa-miR-338-3p, hsa-miR-708-5p
DIO3OS	CD44	hsa-miR-143-3p, hsa-miR-145-5p, hsa-miR-199a-5p, hsa-miR-708-5p
DHRS4-AS1	HMGB1	hsa-miR-129-5p, hsa-miR-193a-3p, hsa-miR-22-3p, hsa-miR-320a, hsa-miR-34a-5p
DHRS4-AS1	BCL2L2	hsa-miR-122-5p, hsa-miR-129-2-3p, hsa-miR-133b, hsa-miR-195-5p, hsa-miR-204-5p
DHRS4-AS1	SPRY2	hsa-miR-122-5p, hsa-miR-27a-3p, hsa-miR-27b-3p
DANCR	MYC	hsa-let-7a-5p, hsa-let-7g-5p, hsa-miR-135a-5p, hsa-miR-135b-5p, hsa-miR-185-5p, hsa-miR-33a-5p, hsa-miR-33b-5p, hsa-miR-34a-5p, hsa-miR-744-5p
CTD-3185P2.1	FMR1	hsa-miR-101-3p, hsa-miR-129-5p, hsa-miR-130b-3p
CTD-3185P2.1	MECP2	hsa-miR-122-5p, hsa-miR-130a-3p, hsa-miR-181c-5p, hsa-miR-212-3p
CTD-2587M2.1	KAT2B	hsa-miR-25-3p, hsa-miR-32-5p, hsa-miR-92a-3p
CTD-2587M2.1	FBXW7	hsa-miR-25-3p, hsa-miR-32-5p, hsa-miR-363-3p, hsa-miR-92a-3p
CTD-2530N21.4	WNT1	hsa-miR-148a-3p, hsa-miR-148b-3p, hsa-miR-152-3p
CTD-2260A17.1	MYC	hsa-miR-135a-5p, hsa-miR-135b-5p, hsa-miR-33a-5p, hsa-miR-33b-5p
CTD-2228K2.7	VDAC1	hsa-miR-29a-3p, hsa-miR-320a, hsa-miR-7-5p
CTD-2228K2.7	ETS2	hsa-miR-196b-5p, hsa-miR-221-3p, hsa-miR-222-3p
CTD-2228K2.7	CDKN1A	hsa-let-7a-5p, hsa-miR-10b-5p, hsa-miR-125a-5p, hsa-miR-146a-5p, hsa-miR-146b-5p, hsa-miR-15a-5p, hsa-miR-16-5p, hsa-miR-17-3p, hsa-miR-182-5p, hsa-miR-18a-5p, hsa-miR-196a-5p, hsa-miR-22-3p, hsa-miR-25-3p, hsa-miR-28-5p, hsa-miR-29b-3p, hsa-miR-345-5p, hsa-miR-34a-5p, hsa-miR-423-3p, hsa-miR-4295, hsa-miR-503-5p, hsa-miR-7-5p, hsa-miR-96-5p
CTD-2228K2.7	BACE1	hsa-miR-107, hsa-miR-124-3p, hsa-miR-15a-5p, hsa-miR-16-5p, hsa-miR-29a-3p, hsa-miR-29b-3p, hsa-miR-29c-3p, hsa-miR-328-3p, hsa-miR-339-5p
CTD-2228K2.7	AKT1	hsa-let-7b-5p, hsa-miR-100-5p, hsa-miR-10b-5p, hsa-miR-125a-5p, hsa-miR-125b-5p, hsa-miR-138-5p, hsa-miR-182-5p, hsa-miR-184, hsa-miR-185-3p, hsa-miR-192-5p, hsa-miR-196b-5p, hsa-miR-199a-3p, hsa-miR-205-5p, hsa-miR-22-3p, hsa-miR-29b-3p, hsa-miR-34a-5p, hsa-miR-409-3p, hsa-miR-494-3p, hsa-miR-542-3p, hsa-miR-708-5p, hsa-miR-99a-5p
CTD-2228K2.7	NOD2	hsa-miR-10a-5p, hsa-miR-320a, hsa-miR-320b, hsa-miR-320c
CTD-2228K2.7	MAP3K11	hsa-miR-125b-5p, hsa-miR-138-5p, hsa-miR-199a-5p
CTD-2228K2.7	FZD4	hsa-miR-199a-5p, hsa-miR-29c-3p, hsa-miR-493-3p
CTD-2228K2.7	CORO1A	hsa-miR-221-3p, hsa-miR-222-3p, hsa-miR-24-3p
CTD-2147F2.1	TCF7L1	hsa-miR-200b-3p, hsa-miR-200c-3p, hsa-miR-429
CTD-2116N17.1	NASP	hsa-miR-29a-3p, hsa-miR-29b-3p, hsa-miR-29c-3p
CTD-2116N17.1	DNMT3B	hsa-miR-29a-3p, hsa-miR-29b-3p, hsa-miR-29c-3p
CTD-2116N17.1	CDC42	hsa-miR-29a-3p, hsa-miR-29b-3p, hsa-miR-29c-3p
CTD-2116N17.1	TDG	hsa-miR-29a-3p, hsa-miR-29b-3p, hsa-miR-29c-3p
CTD-2116N17.1	MYCN	hsa-miR-29a-3p, hsa-miR-29b-3p, hsa-miR-29c-3p
CTD-2036P10.3	BMI1	hsa-miR-200b-3p, hsa-miR-200c-3p, hsa-miR-320a, hsa-miR-376c-3p
CTD-2015H6.3	CDK4	hsa-miR-135a-5p, hsa-miR-206, hsa-miR-24-3p
CTD-2015H6.3	BRCA1	hsa-miR-206, hsa-miR-20b-5p, hsa-miR-24-3p
CTD-2013N24.2	BMI1	hsa-miR-139-5p, hsa-miR-200b-3p, hsa-miR-200c-3p
CTC-338M12.4	PURA	hsa-miR-15a-5p, hsa-miR-15b-5p, hsa-miR-16-5p
CTB-89H12.4	PTK2	hsa-miR-135a-5p, hsa-miR-138-5p, hsa-miR-379-5p, hsa-miR-543, hsa-miR-7-5p
CTB-89H12.4	TNFRSF10B	hsa-let-7a-5p, hsa-let-7b-5p, hsa-let-7d-5p, hsa-let-7e-5p, hsa-let-7g-5p, hsa-miR-21-5p
CTB-89H12.4	MAPK9	hsa-miR-106a-5p, hsa-miR-106b-5p, hsa-miR-141-3p, hsa-miR-17-5p, hsa-miR-199a-3p, hsa-miR-20a-5p, hsa-miR-20b-5p, hsa-miR-93-5p
CTB-89H12.4	TXNIP	hsa-miR-135a-5p, hsa-miR-138-5p, hsa-miR-204-5p, hsa-miR-211-5p, hsa-miR-373-3p
CTB-89H12.4	YOD1	hsa-miR-106b-5p, hsa-miR-155-5p, hsa-miR-17-3p, hsa-miR-17-5p, hsa-miR-18a-5p, hsa-miR-20a-5p, hsa-miR-21-5p, hsa-miR-93-5p
CTB-89H12.4	VEGFA	hsa-miR-101-3p, hsa-miR-101-5p, hsa-miR-106a-5p, hsa-miR-106b-5p, hsa-miR-107, hsa-miR-125a-5p, hsa-miR-126-5p, hsa-miR-1-3p, hsa-miR-141-3p, hsa-miR-145-5p, hsa-miR-150-5p, hsa-miR-15a-5p, hsa-miR-15b-5p, hsa-miR-16-1-3p, hsa-miR-16-5p, hsa-miR-17-5p, hsa-miR-181a-5p, hsa-miR-185-5p, hsa-miR-186-5p, hsa-miR-195-5p, hsa-miR-199a-3p, hsa-miR-199a-5p, hsa-miR-200b-3p, hsa-miR-200c-3p, hsa-miR-205-5…
CTB-89H12.4	TET2	hsa-miR-101-3p, hsa-miR-125b-5p, hsa-miR-22-3p, hsa-miR-26a-5p, hsa-miR-29a-3p, hsa-miR-29b-3p, hsa-miR-29c-3p, hsa-miR-7-5p
CTB-89H12.4	SRSF1	hsa-miR-10a-5p, hsa-miR-10b-5p, hsa-miR-505-3p, hsa-miR-7-5p, hsa-miR-9-5p
CTB-89H12.4	SIRT1	hsa-miR-132-3p, hsa-miR-133b, hsa-miR-138-5p, hsa-miR-142-5p, hsa-miR-181a-5p, hsa-miR-181b-5p, hsa-miR-181c-5p, hsa-miR-199a-5p, hsa-miR-199b-5p, hsa-miR-200c-3p, hsa-miR-204-5p, hsa-miR-217, hsa-miR-221-3p, hsa-miR-22-3p, hsa-miR-29c-3p, hsa-miR-34a-3p, hsa-miR-34a-5p, hsa-miR-373-3p, hsa-miR-449a, hsa-miR-449b-5p, hsa-miR-520c-3p, hsa-miR-543, hsa-miR-9-5p
CTB-89H12.4	SIAH1	hsa-miR-107, hsa-miR-135a-5p, hsa-miR-424-5p, hsa-miR-944
CTB-89H12.4	SETD2	hsa-miR-106b-5p, hsa-miR-186-5p, hsa-miR-199a-5p, hsa-miR-199b-5p, hsa-miR-21-5p, hsa-miR-526b-3p
CTB-89H12.4	RPS6KB1	hsa-miR-145-5p, hsa-miR-16-5p, hsa-miR-195-5p, hsa-miR-200c-3p, hsa-miR-218-5p, hsa-miR-497-5p
CTB-89H12.4	PURA	hsa-miR-106b-5p, hsa-miR-15a-5p, hsa-miR-15b-5p, hsa-miR-16-5p, hsa-miR-20a-5p, hsa-miR-93-5p
CTB-89H12.4	NCOA3	hsa-miR-137, hsa-miR-17-3p, hsa-miR-17-5p, hsa-miR-18a-5p, hsa-miR-21-5p, hsa-miR-29b-3p, hsa-miR-33a-5p
CTB-89H12.4	MCL1	hsa-miR-101-3p, hsa-miR-106a-5p, hsa-miR-125a-5p, hsa-miR-125b-5p, hsa-miR-133b, hsa-miR-139-5p, hsa-miR-148b-5p, hsa-miR-181a-5p, hsa-miR-181b-5p, hsa-miR-20a-5p, hsa-miR-26a-5p, hsa-miR-29a-3p, hsa-miR-29b-3p, hsa-miR-29c-3p, hsa-miR-302b-3p, hsa-miR-30c-5p, hsa-miR-320a, hsa-miR-339-3p, hsa-miR-512-5p, hsa-miR-518a-5p, hsa-miR-582-5p
CTB-89H12.4	MBNL1	hsa-miR-10b-5p, hsa-miR-30a-5p, hsa-miR-30b-5p, hsa-miR-30e-5p
CTB-89H12.4	HIF1A	hsa-miR-106a-5p, hsa-miR-106b-5p, hsa-miR-107, hsa-miR-138-5p, hsa-miR-142-5p, hsa-miR-155-5p, hsa-miR-17-5p, hsa-miR-186-5p, hsa-miR-18a-5p, hsa-miR-18b-5p, hsa-miR-199a-5p, hsa-miR-199b-5p, hsa-miR-20a-5p, hsa-miR-20b-5p, hsa-miR-22-3p, hsa-miR-27a-3p, hsa-miR-338-3p, hsa-miR-33a-5p, hsa-miR-424-5p, hsa-miR-429, hsa-miR-519c-3p
CTB-89H12.4	HDAC4	hsa-miR-125a-5p, hsa-miR-1-3p, hsa-miR-22-3p, hsa-miR-29b-3p, hsa-miR-302b-3p, hsa-miR-30c-5p, hsa-miR-381-3p, hsa-miR-9-5p
CTB-89H12.4	FLT1	hsa-miR-181a-5p, hsa-miR-199a-3p, hsa-miR-200b-3p, hsa-miR-200c-3p, hsa-miR-222-3p, hsa-miR-24-3p
CTB-89H12.4	ERBB2IP	hsa-miR-141-3p, hsa-miR-200a-3p, hsa-miR-200b-3p, hsa-miR-200c-3p, hsa-miR-429
CTB-89H12.4	APC	hsa-miR-106a-5p, hsa-miR-106b-5p, hsa-miR-125b-5p, hsa-miR-129-5p, hsa-miR-135a-5p, hsa-miR-135b-5p, hsa-miR-155-5p, hsa-miR-27a-3p, hsa-miR-590-3p
CTB-89H12.4	SP1	hsa-miR-129-5p, hsa-miR-133b, hsa-miR-137, hsa-miR-1-3p, hsa-miR-145-5p, hsa-miR-149-5p, hsa-miR-150-5p, hsa-miR-200b-3p, hsa-miR-200c-3p, hsa-miR-21-5p, hsa-miR-218-5p, hsa-miR-223-3p, hsa-miR-22-3p, hsa-miR-24-3p, hsa-miR-27a-3p, hsa-miR-29b-3p, hsa-miR-29c-3p, hsa-miR-326, hsa-miR-330-3p, hsa-miR-335-5p, hsa-miR-33a-5p, hsa-miR-429
CTB-89H12.4	SH3PXD2A	hsa-miR-155-5p, hsa-miR-200c-3p, hsa-miR-22-3p, hsa-miR-24-3p
CTB-89H12.4	PELI1	hsa-miR-106b-5p, hsa-miR-155-5p, hsa-miR-17-3p, hsa-miR-17-5p, hsa-miR-18a-5p, hsa-miR-20a-5p, hsa-miR-93-5p
CTB-89H12.4	MBNL2	hsa-miR-10b-5p, hsa-miR-218-5p, hsa-miR-302d-3p, hsa-miR-30a-5p, hsa-miR-30b-5p, hsa-miR-30e-5p
CTB-89H12.4	KLHL20	hsa-miR-141-3p, hsa-miR-200a-3p, hsa-miR-200b-3p, hsa-miR-200c-3p, hsa-miR-429
CTB-89H12.4	CLIP1	hsa-miR-106b-5p, hsa-miR-155-5p, hsa-miR-17-3p, hsa-miR-17-5p, hsa-miR-18a-5p, hsa-miR-20a-5p, hsa-miR-93-5p
CROCCP2	ERBB4	hsa-miR-19a-3p, hsa-miR-302b-3p, hsa-miR-302d-3p, hsa-miR-372-3p
CROCCP2	YOD1	hsa-miR-106b-5p, hsa-miR-17-5p, hsa-miR-19a-3p, hsa-miR-19b-3p, hsa-miR-20a-5p, hsa-miR-25-3p, hsa-miR-93-5p
CROCCP2	WEE1	hsa-miR-106b-5p, hsa-miR-15a-5p, hsa-miR-15b-5p, hsa-miR-16-5p, hsa-miR-17-5p, hsa-miR-195-5p, hsa-miR-20a-5p, hsa-miR-372-3p, hsa-miR-503-5p
CROCCP2	RBL1	hsa-miR-106b-5p, hsa-miR-17-5p, hsa-miR-20a-5p
CROCCP2	RAF1	hsa-miR-125a-5p, hsa-miR-125b-5p, hsa-miR-16-5p, hsa-miR-195-5p, hsa-miR-7-5p
CROCCP2	MTOR	hsa-miR-100-5p, hsa-miR-125a-5p, hsa-miR-16-5p, hsa-miR-193a-5p, hsa-miR-373-3p, hsa-miR-520c-3p, hsa-miR-99a-5p
CROCCP2	MFN2	hsa-miR-106a-5p, hsa-miR-106b-5p, hsa-miR-17-5p
CROCCP2	MAP3K12	hsa-miR-130a-3p, hsa-miR-17-5p, hsa-miR-20a-5p
CROCCP2	LEFTY2	hsa-miR-302a-3p, hsa-miR-302d-3p, hsa-miR-373-3p
CROCCP2	IGF1R	hsa-miR-100-5p, hsa-miR-125b-5p, hsa-miR-16-5p, hsa-miR-185-5p, hsa-miR-335-5p, hsa-miR-378a-3p, hsa-miR-503-5p, hsa-miR-7-5p, hsa-miR-99a-5p
CROCCP2	ERBB2	hsa-miR-125a-5p, hsa-miR-125b-5p, hsa-miR-130b-3p, hsa-miR-193a-5p, hsa-miR-205-5p, hsa-miR-22-3p, hsa-miR-25-3p
CROCCP2	E2F1	hsa-miR-106a-5p, hsa-miR-106b-5p, hsa-miR-17-5p, hsa-miR-205-5p, hsa-miR-20a-5p, hsa-miR-302b-3p, hsa-miR-519d-3p, hsa-miR-93-5p
CROCCP2	ARID4B	hsa-miR-106a-5p, hsa-miR-19b-3p, hsa-miR-20b-5p, hsa-miR-92a-3p
CROCCP2	PHLPP1	hsa-miR-15a-5p, hsa-miR-17-5p, hsa-miR-19a-3p, hsa-miR-92a-3p
[truncated: 232 more rows]

## Sheet: PrCa
Sponge lncRNAs	mRNAs	Shared miRNAs
[truncated: 3,017 more rows]
