# Supplementary material for: LncmiRSRN: identification and analysis of long non-coding RNA related miRNA sponge regulatory network in human cancer
Source: Oxford University Press journal article supplement (doi:10.1093/bioinformatics/bty525), 2018-06-27
Supplement: bioinformatics_34_24_4232_s4.xlsx [file bioinformatics_34_24_4232_s4.xlsx]

## Sheet: Differential LncmiRSRN modules
Module ID	#Genes	#Sponge lncRNAs	#mRNAs	Shared miRNAs	Gene list
1	5	2	3	hsa-miR-129-5p, hsa-miR-148a-3p, hsa-miR-148b-3p, hsa-miR-152-3p, hsa-miR-187-3p, hsa-miR-200a-3p, hsa-miR-24-3p, hsa-miR-29c-3p, hsa-miR-335-5p	PCAT2	ATP6V0E2-AS1	WNT4	HLA-G	FOXA2
2	9	4	5	hsa-miR-148a-3p, hsa-miR-148a-5p, hsa-miR-16-5p, hsa-miR-181a-5p, hsa-miR-181b-5p, hsa-miR-193b-3p, hsa-miR-195-5p, hsa-miR-214-3p, hsa-miR-218-1-3p, hsa-miR-22-5p, hsa-miR-26a-5p, hsa-miR-27a-3p, hsa-miR-29b-3p, hsa-miR-29c-3p, hsa-miR-30c-5p, hsa-miR-320a, hsa-miR-34a-3p, hsa-miR-34a-5p, hsa-miR-34c-5p, hsa-miR-375, hsa-miR-518a-5p, hsa-miR-541-3p	ZFAS1	PSMG3-AS1	MIR4458HG	LRRC75A-AS1	PIK3C2A	YWHAZ	TGIF2	TCL1A	ARL2
3	23	2	21	hsa-let-7g-5p, hsa-miR-100-5p, hsa-miR-107, hsa-miR-10a-5p, hsa-miR-10b-5p, hsa-miR-125a-5p, hsa-miR-125b-5p, hsa-miR-138-5p, hsa-miR-1-3p, hsa-miR-140-5p, hsa-miR-141-3p, hsa-miR-145-5p, hsa-miR-150-5p, hsa-miR-155-5p, hsa-miR-15b-5p, hsa-miR-16-5p, hsa-miR-17-3p, hsa-miR-181a-5p, hsa-miR-199a-3p, hsa-miR-199a-5p, hsa-miR-199b-3p, hsa-miR-199b-5p, hsa-miR-200a-3p, hsa-miR-200b-3p, hsa-miR-200c-3…	TP73-AS1	RP11-758M4.4	GALNT7	HSPA5	FN1	CTDSPL	WASF3	LDHA	GATA4	DDR1	ANGPT2	STAT5A	STAT1	ITGA3	DLC1	TIMP1	TAZ	SOX6	SMURF1	NF1	HOXA1	HFE	EIF4EBP1
4	6	2	4	hsa-miR-106a-5p, hsa-miR-106b-5p, hsa-miR-154-5p, hsa-miR-181a-5p, hsa-miR-19a-5p, hsa-miR-19b-3p, hsa-miR-205-5p, hsa-miR-20b-5p, hsa-miR-22-3p, hsa-miR-373-3p, hsa-miR-92a-3p, hsa-miR-98-5p	SNHG5	HAGLR	MYLIP	E2F5	BTG1	ARID4B
5	5	3	2	hsa-miR-188-5p, hsa-miR-200c-3p, hsa-miR-29a-3p, hsa-miR-29b-3p, hsa-miR-29c-3p, hsa-miR-30c-5p, hsa-miR-30e-5p	SNHG17	RP11-386G11.10	KB-1208A12.3	UBE2I	COL4A2
6	10	3	7	hsa-let-7b-5p, hsa-miR-126-5p, hsa-miR-132-3p, hsa-miR-135a-5p, hsa-miR-137, hsa-miR-138-5p, hsa-miR-139-5p, hsa-miR-1-3p, hsa-miR-145-5p, hsa-miR-16-5p, hsa-miR-19a-3p, hsa-miR-19b-3p, hsa-miR-23a-3p, hsa-miR-24-3p, hsa-miR-26a-5p, hsa-miR-27b-5p, hsa-miR-29a-3p, hsa-miR-320a, hsa-miR-33a-5p, hsa-miR-375, hsa-miR-451a, hsa-miR-9-5p	SNHG14	RP11-434B12.1	RFPL1S	CPEB4	PRKAA1	RAB14	SPRED1	SLC6A4	LDHB	CSE1L
7	23	4	19	hsa-let-7b-5p, hsa-let-7f-5p, hsa-miR-101-3p, hsa-miR-107, hsa-miR-124-3p, hsa-miR-135a-5p, hsa-miR-137, hsa-miR-138-5p, hsa-miR-139-5p, hsa-miR-141-3p, hsa-miR-144-3p, hsa-miR-146a-5p, hsa-miR-146b-5p, hsa-miR-15b-5p, hsa-miR-16-5p, hsa-miR-181a-5p, hsa-miR-181b-5p, hsa-miR-192-5p, hsa-miR-193a-3p, hsa-miR-193b-3p, hsa-miR-196a-5p, hsa-miR-196b-5p, hsa-miR-199a-3p, hsa-miR-199a-5p, hsa-miR-200a-…	SRP14-AS1	SNHG6	SNHG12	MMP24-AS1	CD274	PIM1	CXCL2	ACTA2	LIF	SIAH1	PTGS2	SOCS3	SRC	ESRRA	CCL5	NFKB1	IRAK1	DUSP1	RAB23	PLAU	GNPDA1	FAS	EFNA1
8	5	2	3	hsa-let-7a-5p, hsa-let-7c-5p, hsa-miR-139-5p, hsa-miR-320a, hsa-miR-34a-5p, hsa-miR-449a, hsa-miR-449b-5p, hsa-miR-98-5p	RP11-44F21.5	CECR7	ITGB3	FOS	HDAC1
9	11	6	5	hsa-miR-106a-5p, hsa-miR-106b-5p, hsa-miR-124-3p, hsa-miR-129-5p, hsa-miR-132-3p, hsa-miR-141-3p, hsa-miR-143-3p, hsa-miR-145-5p, hsa-miR-15b-5p, hsa-miR-17-5p, hsa-miR-182-5p, hsa-miR-185-5p, hsa-miR-199a-5p, hsa-miR-200a-3p, hsa-miR-204-5p, hsa-miR-20a-5p, hsa-miR-21-5p, hsa-miR-29b-3p, hsa-miR-338-3p, hsa-miR-34a-5p, hsa-miR-377-3p, hsa-miR-491-5p, hsa-miR-497-5p, hsa-miR-519d-3p, hsa-miR-9-3p	SNRK-AS1	RP11-173P15.3	LINC00205	CEP164P1	AC108142.1	AC002401.1	PSMD9	TIMP2	TRIM8	MMP9	COL1A1
10	4	2	2	hsa-miR-182-5p, hsa-miR-192-5p, hsa-miR-205-5p, hsa-miR-215-5p, hsa-miR-27a-3p, hsa-miR-33a-5p	RP11-864G5.3	RASSF8-AS1	WNK1	SATB2
11	13	6	7	hsa-let-7a-5p, hsa-miR-124-3p, hsa-miR-135a-5p, hsa-miR-138-5p, hsa-miR-139-5p, hsa-miR-141-3p, hsa-miR-142-3p, hsa-miR-16-5p, hsa-miR-199a-3p, hsa-miR-200a-3p, hsa-miR-200b-3p, hsa-miR-200c-3p, hsa-miR-26a-5p, hsa-miR-26b-5p, hsa-miR-302c-5p, hsa-miR-30d-5p, hsa-miR-31-5p, hsa-miR-429, hsa-miR-520e	RP1-151F17.1	RP11-473I1.5	RP11-359B12.2	OIP5-AS1	LINC00265	CTD-2636A23.2	MAP4K4	ERBB2IP	ELMO2	HGF	ROCK2	RASSF2	KLF11
12	9	2	7	hsa-let-7c-5p, hsa-miR-122-5p, hsa-miR-129-5p, hsa-miR-138-5p, hsa-miR-140-5p, hsa-miR-143-3p, hsa-miR-145-5p, hsa-miR-196a-5p, hsa-miR-222-3p, hsa-miR-24-3p, hsa-miR-27b-3p, hsa-miR-33a-5p, hsa-miR-34a-5p, hsa-miR-365a-3p, hsa-miR-374a-5p, hsa-miR-488-3p, hsa-miR-526b-3p, hsa-miR-7-5p, hsa-miR-9-5p	TMPO-AS1	NUTM2A-AS1	PAX6	FOSL1	MMP1	CEBPB	MMP13	IGF2BP3	HMOX1
13	12	9	3	hsa-miR-211-5p, hsa-miR-29a-3p, hsa-miR-29b-3p, hsa-miR-29c-3p	MEF2C-AS1	RP11-760H22.2	RP11-290F5.2	RP11-1100L3.8	PDXDC2P	MIAT	AC113331.9	AC083843.1	AC058791.1	COL5A2	COL10A1	SPARC
14	28	8	20	hsa-let-7b-5p, hsa-miR-100-5p, hsa-miR-107, hsa-miR-10a-5p, hsa-miR-10b-5p, hsa-miR-122-5p, hsa-miR-124-3p, hsa-miR-125a-3p, hsa-miR-125a-5p, hsa-miR-125b-1-3p, hsa-miR-125b-5p, hsa-miR-126-5p, hsa-miR-127-3p, hsa-miR-130b-3p, hsa-miR-136-5p, hsa-miR-1-3p, hsa-miR-141-3p, hsa-miR-143-5p, hsa-miR-145-5p, hsa-miR-148a-3p, hsa-miR-151a-5p, hsa-miR-15b-5p, hsa-miR-17-5p, hsa-miR-181a-5p, hsa-miR-181b…	RP11-7K24.3	RP11-473M20.16	RP11-265N6.1	RP11-10J21.4	PAXBP1-AS1	MIR7-3HG	MEG3	LOC648987	CLOCK	CPEB3	RCOR1	HIPK2	CYLD	CRIM1	PIK3CG	SMO	ERBB3	N4BP1	ILK	CD34	ELN	SGPL1	MYOCD	S1PR1	MAPK8	FGFR3	XBP1	RASAL2
15	14	7	7	hsa-let-7a-5p, hsa-miR-103a-3p, hsa-miR-106b-5p, hsa-miR-107, hsa-miR-124-3p, hsa-miR-129-5p, hsa-miR-143-3p, hsa-miR-145-5p, hsa-miR-186-5p, hsa-miR-192-5p, hsa-miR-199a-5p, hsa-miR-19a-3p, hsa-miR-19b-1-5p, hsa-miR-20a-5p, hsa-miR-217, hsa-miR-26a-5p, hsa-miR-296-5p, hsa-miR-301a-3p, hsa-miR-302d-3p, hsa-miR-30b-5p, hsa-miR-30c-5p, hsa-miR-34a-5p, hsa-miR-372-3p, hsa-miR-520a-3p, hsa-miR-520b, …	AC025165.8	WAC-AS1	TTC28-AS1	RP11-498C9.3	MAGI2-AS3	LINC-PINT	CASP8AP2	PFKP	NR4A2	SERPINE1	MAP3K2	CAV1	REST	CASP8
16	8	4	4	hsa-let-7f-5p, hsa-miR-148a-3p, hsa-miR-18a-3p, hsa-miR-19b-3p, hsa-miR-22-3p, hsa-miR-339-5p, hsa-miR-378a-3p, hsa-miR-421, hsa-miR-9-5p, hsa-miR-98-5p	RP1-86D1.5	PITPNA-AS1	LINC00963	CTD-2020K17.3	CYP19A1	CBX7	CCKAR	RGS2
17	23	7	16	hsa-miR-106a-5p, hsa-miR-106b-5p, hsa-miR-130a-3p, hsa-miR-130b-3p, hsa-miR-138-5p, hsa-miR-1-3p, hsa-miR-144-3p, hsa-miR-145-5p, hsa-miR-146a-5p, hsa-miR-150-5p, hsa-miR-15b-5p, hsa-miR-17-5p, hsa-miR-181a-5p, hsa-miR-181b-5p, hsa-miR-185-5p, hsa-miR-18a-5p, hsa-miR-196a-5p, hsa-miR-19b-3p, hsa-miR-200c-3p, hsa-miR-204-5p, hsa-miR-20a-5p, hsa-miR-20b-5p, hsa-miR-211-5p, hsa-miR-21-5p, hsa-miR-22…	RP3-325F22.3	RP11-115D19.1	LINC00958	LINC00324	KB-1732A1.1	EPB41L4A-AS1	AL022341.3	RASSF1	CXCR4	ICAM1	EPAS1	IL11	MAP2K3	MAP3K12	IRF2	HIPK3	DPYD	NOS3	TP63	NRP2	GADD45A	TGFB1	CASP7
18	14	11	3	hsa-miR-101-3p, hsa-miR-124-3p, hsa-miR-1-3p, hsa-miR-181a-5p, hsa-miR-199a-5p, hsa-miR-221-3p, hsa-miR-222-3p, hsa-miR-222-5p, hsa-miR-25-3p, hsa-miR-92b-3p	ZBED5-AS1	TINCR	RP5-991G20.1	RP11-6O2.4	RP11-414J4.2	RP11-179B15.5	RNF219-AS1	RMST	LINC00641	FAM83H-AS1	AC009948.5	CDKN1C	CEBPA	KLF6
19	4	2	2	hsa-miR-125a-5p, hsa-miR-135a-5p, hsa-miR-139-5p, hsa-miR-29a-3p, hsa-miR-29b-3p, hsa-miR-30a-5p	LY86-AS1	LINC00461	TET1	MMP11
20	5	2	3	hsa-miR-103a-3p, hsa-miR-208a-3p, hsa-miR-208b-3p, hsa-miR-26a-5p, hsa-miR-26b-5p, hsa-miR-29a-3p, hsa-miR-301a-3p, hsa-miR-34a-5p, hsa-miR-424-5p, hsa-miR-503-5p, hsa-miR-630	SBF2-AS1	HNRNPU-AS1	NAMPT	CDC14A	CACNA1C
21	5	2	3	hsa-miR-106a-5p, hsa-miR-129-5p, hsa-miR-132-3p, hsa-miR-142-5p, hsa-miR-144-3p, hsa-miR-194-5p, hsa-miR-196a-5p, hsa-miR-19a-3p, hsa-miR-204-5p, hsa-miR-26a-5p, hsa-miR-27a-3p, hsa-miR-30a-5p, hsa-miR-30c-5p, hsa-miR-320a	HCG11	AL132709.8	IL10	VIM	NFE2L2
22	16	2	14	hsa-let-7c-5p, hsa-let-7e-5p, hsa-miR-100-5p, hsa-miR-103a-3p, hsa-miR-10b-3p, hsa-miR-10b-5p, hsa-miR-125a-5p, hsa-miR-125b-5p, hsa-miR-130a-3p, hsa-miR-133b, hsa-miR-1-3p, hsa-miR-141-3p, hsa-miR-143-3p, hsa-miR-145-5p, hsa-miR-151a-5p, hsa-miR-15a-5p, hsa-miR-18a-5p, hsa-miR-18b-5p, hsa-miR-195-5p, hsa-miR-199b-5p, hsa-miR-19a-3p, hsa-miR-200a-3p, hsa-miR-200b-3p, hsa-miR-200c-3p, hsa-miR-210-…	HOXC-AS1	H19	RIN2	FASN	LOX	IMPDH1	DLL4	SET	MBNL2	CTGF	TNFAIP1	PLK1	SMARCA5	MAPK7	HSPA4	BNIP3
23	28	5	23	hsa-miR-103a-3p, hsa-miR-107, hsa-miR-10a-5p, hsa-miR-10b-5p, hsa-miR-1207-5p, hsa-miR-122-5p, hsa-miR-125b-5p, hsa-miR-128-3p, hsa-miR-138-5p, hsa-miR-139-5p, hsa-miR-140-5p, hsa-miR-143-3p, hsa-miR-145-5p, hsa-miR-147b, hsa-miR-148b-3p, hsa-miR-150-5p, hsa-miR-152-3p, hsa-miR-155-5p, hsa-miR-181a-3p, hsa-miR-181a-5p, hsa-miR-181c-5p, hsa-miR-182-5p, hsa-miR-185-5p, hsa-miR-192-5p, hsa-miR-193a-…	TRAF3IP2-AS1	LINC01314	GAS5	FLVCR1-AS1	DANCR	SSSCA1	LAMC1	SRSF1	NANOG	ADAM17	ST8SIA4	RAD51	CUL5	MACC1	PIK3R3	FZD6	FGF9	TACC3	NR1H3	SSX2IP	CCNJ	TERT	MAP2K4	SCARB1	DHFR	SMARCA4	NR5A2	NDUFA4
24	17	5	12	hsa-let-7e-5p, hsa-let-7i-5p, hsa-miR-103a-3p, hsa-miR-107, hsa-miR-10a-3p, hsa-miR-124-3p, hsa-miR-125a-5p, hsa-miR-125b-5p, hsa-miR-128-3p, hsa-miR-129-5p, hsa-miR-132-3p, hsa-miR-1-3p, hsa-miR-143-3p, hsa-miR-144-3p, hsa-miR-145-5p, hsa-miR-146a-5p, hsa-miR-146b-5p, hsa-miR-150-5p, hsa-miR-17-5p, hsa-miR-181a-5p, hsa-miR-183-5p, hsa-miR-18b-5p, hsa-miR-190b, hsa-miR-199a-3p, hsa-miR-20a-5p, hs…	TRAM2-AS1	TPT1-AS1	MIR99AHG	LINC00665	FTX	KLF13	IGF1	SKP2	MBNL1	SERPINB5	PPP2R2A	AHR	IRAK4	TRAF6	MAP3K8	MMP14	EGR1
25	27	4	23	hsa-let-7a-5p, hsa-let-7b-5p, hsa-let-7i-5p, hsa-miR-101-3p, hsa-miR-103a-3p, hsa-miR-107, hsa-miR-122-5p, hsa-miR-124-3p, hsa-miR-129-2-3p, hsa-miR-129-5p, hsa-miR-130b-3p, hsa-miR-132-3p, hsa-miR-137, hsa-miR-139-5p, hsa-miR-141-3p, hsa-miR-143-3p, hsa-miR-145-5p, hsa-miR-146a-5p, hsa-miR-146b-5p, hsa-miR-148a-3p, hsa-miR-153-3p, hsa-miR-155-5p, hsa-miR-15b-5p, hsa-miR-16-5p, hsa-miR-17-5p, hsa…	TRHDE-AS1	LINC01102	FGD5-AS1	CTD-3185P2.1	ABCB1	LEF1	PRKCE	NCSTN	PARP1	TLR4	RASA1	BMP7	PPM1D	ADAM10	PDIA3	HBP1	CAB39	MEIS1	KLF5	RHOB	PEA15	UBE2F	TSC1	QKI	KLF12	FMR1	FBXO11
26	16	2	14	hsa-let-7a-5p, hsa-let-7e-5p, hsa-miR-100-5p, hsa-miR-10a-5p, hsa-miR-10b-5p, hsa-miR-124-3p, hsa-miR-125a-3p, hsa-miR-125a-5p, hsa-miR-125b-5p, hsa-miR-138-5p, hsa-miR-148a-3p, hsa-miR-16-5p, hsa-miR-182-5p, hsa-miR-18a-5p, hsa-miR-193a-3p, hsa-miR-196b-5p, hsa-miR-199a-5p, hsa-miR-221-3p, hsa-miR-222-3p, hsa-miR-24-3p, hsa-miR-296-5p, hsa-miR-29a-3p, hsa-miR-29b-3p, hsa-miR-29c-3p, hsa-miR-30c-…	SRRM2-AS1	CTD-2228K2.7	ARID3A	SIRT7	NCOR2	BAK1	S100B	VDAC1	ETS2	FZD4	CORO1A	FLOT1	NR1I2	MAP3K11	ULBP2	IRF4
27	11	2	9	hsa-let-7b-5p, hsa-let-7d-5p, hsa-let-7g-5p, hsa-miR-103a-3p, hsa-miR-125b-5p, hsa-miR-143-3p, hsa-miR-155-5p, hsa-miR-17-3p, hsa-miR-17-5p, hsa-miR-181b-5p, hsa-miR-183-5p, hsa-miR-18a-5p, hsa-miR-199a-3p, hsa-miR-199a-5p, hsa-miR-200a-3p, hsa-miR-200c-3p, hsa-miR-20a-5p, hsa-miR-212-3p, hsa-miR-21-5p, hsa-miR-221-3p, hsa-miR-222-3p, hsa-miR-22-3p, hsa-miR-24-3p, hsa-miR-26b-5p, hsa-miR-29a-3p, …	EMX2OS	CTB-89H12.4	COL3A1	TIMP3	GAB2	SOCS6	SH3PXD2A	TFAM	SOD2	PIAS3	COL1A2
28	19	8	11	hsa-let-7b-5p, hsa-miR-101-3p, hsa-miR-107, hsa-miR-137, hsa-miR-140-3p, hsa-miR-141-3p, hsa-miR-142-5p, hsa-miR-145-5p, hsa-miR-17-5p, hsa-miR-181a-5p, hsa-miR-192-5p, hsa-miR-193a-3p, hsa-miR-199a-5p, hsa-miR-200a-3p, hsa-miR-200b-3p, hsa-miR-200c-3p, hsa-miR-204-5p, hsa-miR-224-5p, hsa-miR-25-3p, hsa-miR-27b-3p, hsa-miR-29a-3p, hsa-miR-29b-3p, hsa-miR-29c-3p, hsa-miR-409-3p, hsa-miR-424-5p, hs…	SOX2-OT	RP11-488L18.10	LINC01184	KANTR	GS1-124K5.11	FBXL19-AS1	FAM66C	AC005154.6	TGFB2	KEAP1	ITGA6	RND3	ACVR2B	TCF4	ATF6	KDM5B	CPEB1	CTNND1	EDNRA
29	6	4	2	hsa-miR-129-5p, hsa-miR-181a-5p, hsa-miR-200c-3p, hsa-miR-23b-3p, hsa-miR-24-3p, hsa-miR-27b-3p, hsa-miR-30a-5p, hsa-miR-30b-5p, hsa-miR-30c-5p, hsa-miR-30d-5p, hsa-miR-30e-5p, hsa-miR-9-5p	ZNF295-AS1	CTA-29F11.1	TUNAR	RP11-148B6.1	NOTCH1	MAP2K1
30	18	14	4	hsa-miR-106a-5p, hsa-miR-106b-5p, hsa-miR-129-5p, hsa-miR-130a-3p, hsa-miR-130b-3p, hsa-miR-135a-5p, hsa-miR-148a-3p, hsa-miR-17-5p, hsa-miR-199a-5p, hsa-miR-20a-5p, hsa-miR-20b-5p, hsa-miR-27a-3p, hsa-miR-27b-3p, hsa-miR-301a-3p, hsa-miR-375, hsa-miR-4295, hsa-miR-495-3p, hsa-miR-532-5p	VPS9D1-AS1	RP11-477J21.6	RP11-366H4.1	RP11-348J24.2	RP11-16E12.2	LINC01419	WWC3-AS1	TMEM161B-AS1	RP4-781K5.2	RP3-468B3.2	RP11-96K19.2	RP11-539L10.2	RP11-30J20.1	AC007879.2	RUNX3	APC	LDLR	PPARG
31	5	2	3	hsa-miR-106a-5p, hsa-miR-106b-5p, hsa-miR-17-5p, hsa-miR-20a-5p, hsa-miR-20b-5p, hsa-miR-93-5p	RP5-837M10.4	TPTEP1	MAPK9	DAZAP2	YOD1
32	11	8	3	hsa-miR-134-5p, hsa-miR-185-5p, hsa-miR-320a, hsa-miR-320b, hsa-miR-320c, hsa-miR-370-3p	RP5-1086K13.1	RP11-154D6.1	OSTM1-AS1	AC007679.3	SLC25A5-AS1	LINC01515	NPPA-AS1	GUSBP1	NOD2	FOXM1	AR
33	18	15	3	hsa-let-7a-5p, hsa-let-7c-5p, hsa-let-7d-5p, hsa-let-7e-5p, hsa-let-7f-5p, hsa-let-7g-5p, hsa-let-7i-5p, hsa-miR-137, hsa-miR-1-3p, hsa-miR-193a-3p, hsa-miR-28-5p, hsa-miR-98-5p	RP3-399L15.1	RP11-293M10.6	DNAJC27-AS1	RP11-164J13.1	VSTM2A-OT1	ST3GAL5-AS1	RP4-561L24.3	RP11-264B17.3	RP11-263K19.4	RP11-253E3.3	RP11-1103G16.1	LINC01277	KB-1460A1.5	AP001055.6	AC004593.3	IL13	MPL	E2F6
34	4	2	2	hsa-miR-25-3p, hsa-miR-32-5p, hsa-miR-363-3p, hsa-miR-92a-3p	RP11-757F18.5	CTD-2587M2.1	BCL2L11	HDAC4
35	34	17	17	hsa-let-7b-5p, hsa-let-7e-5p, hsa-miR-103a-3p, hsa-miR-125b-5p, hsa-miR-130a-3p, hsa-miR-130b-3p, hsa-miR-140-5p, hsa-miR-141-3p, hsa-miR-143-3p, hsa-miR-182-5p, hsa-miR-19a-3p, hsa-miR-19b-3p, hsa-miR-200a-3p, hsa-miR-200b-3p, hsa-miR-200c-3p, hsa-miR-204-5p, hsa-miR-20a-5p, hsa-miR-218-5p, hsa-miR-29a-3p, hsa-miR-29b-3p, hsa-miR-29c-3p, hsa-miR-29c-5p, hsa-miR-34a-5p, hsa-miR-34b-5p, hsa-miR-34…	RP11-881M11.4	RP11-547D24.1	LINC01485	TSTD3	SNAI3-AS1	USP3-AS1	THRB-AS1	TEX41	SNHG20	RP11-46C24.7	POU6F2-AS2	MIR663AHG	LINC00355	HOXA-AS3	GATA2-AS1	AP000662.4	AC009299.2	FGB	FGA	DNMT3B	MYCN	CREB5	TET2	DNMT3A	ITGB1	TDG	NASP	SERPINH1	PPP1R13B	FGG	PDGFRA	PKNOX1	GAPDH	FBN1
36	6	3	3	hsa-let-7a-5p, hsa-let-7b-5p, hsa-let-7e-5p, hsa-miR-107, hsa-miR-125a-5p, hsa-miR-125b-5p, hsa-miR-7-5p	RP11-418I22.2	VDAC1P8	UBL7-AS1	LIN28A	LIN28B	PAK1
37	4	2	2	hsa-miR-106a-5p, hsa-miR-1-3p, hsa-miR-17-5p, hsa-miR-19a-3p, hsa-miR-19b-3p, hsa-miR-206, hsa-miR-20a-5p, hsa-miR-218-5p, hsa-miR-302d-3p, hsa-miR-372-3p, hsa-miR-93-5p, hsa-miR-9-5p	PRKCQ-AS1	LINC00887	TGFBR2	GJA1
38	12	7	5	hsa-let-7a-5p, hsa-let-7b-5p, hsa-let-7d-5p, hsa-let-7e-5p, hsa-let-7f-5p, hsa-let-7g-5p, hsa-miR-107, hsa-miR-143-3p, hsa-miR-15a-5p, hsa-miR-16-5p, hsa-miR-181a-5p, hsa-miR-196a-5p, hsa-miR-27a-3p, hsa-miR-27b-3p, hsa-miR-543, hsa-miR-9-5p, hsa-miR-98-5p	FLJ31356	AC124997.1	SATB1-AS1	RP11-491F9.8	RP11-446J8.1	CHKB-AS1	AP001372.2	IGF2BP1	HMGA2	SPRY2	IRS2	HRAS
39	8	6	2	hsa-miR-181a-5p, hsa-miR-181b-5p, hsa-miR-181c-5p, hsa-miR-181d-5p, hsa-miR-28-5p	DACT3-AS1	CTD-2298J14.2	RP11-335O4.3	STEAP3-AS1	RP11-462G2.1	LINC00690	RAP1B	NFIA
40	9	6	3	hsa-let-7a-5p, hsa-let-7b-5p, hsa-let-7e-5p, hsa-miR-122-5p, hsa-miR-125a-5p, hsa-miR-125b-5p, hsa-miR-133b, hsa-miR-138-5p, hsa-miR-143-3p, hsa-miR-155-5p, hsa-miR-185-3p, hsa-miR-199a-3p, hsa-miR-205-5p, hsa-miR-206, hsa-miR-21-5p, hsa-miR-22-3p, hsa-miR-34a-5p, hsa-miR-409-3p, hsa-miR-494-3p	AC074212.5	RP4-614O4.11	LINC01278	JPX	CTD-2555O16.2	AP001062.7	AKT1	CLIC4	TNFAIP3
41	9	7	2	hsa-let-7a-5p, hsa-let-7g-5p, hsa-miR-126-5p, hsa-miR-129-2-3p, hsa-miR-135a-5p, hsa-miR-135b-5p, hsa-miR-145-5p, hsa-miR-155-5p, hsa-miR-17-5p, hsa-miR-185-5p, hsa-miR-21-5p, hsa-miR-24-3p, hsa-miR-26a-5p, hsa-miR-26b-5p, hsa-miR-326, hsa-miR-33a-5p, hsa-miR-33b-5p, hsa-miR-34a-5p, hsa-miR-377-3p, hsa-miR-744-5p	RP11-840I19.3	LINC00202-1	CTD-2260A17.1	TCEB3-AS1	RP4-555D20.2	RP3-475N16.1	RP11-286B14.1	MYC	FSCN1
42	15	8	7	hsa-let-7a-5p, hsa-let-7b-5p, hsa-let-7c-5p, hsa-let-7e-5p, hsa-let-7f-5p, hsa-let-7g-5p, hsa-let-7i-5p, hsa-miR-101-3p, hsa-miR-125a-3p, hsa-miR-135a-5p, hsa-miR-137, hsa-miR-185-5p, hsa-miR-23a-3p, hsa-miR-23b-3p, hsa-miR-26a-5p, hsa-miR-26b-5p, hsa-miR-27a-3p, hsa-miR-27b-3p, hsa-miR-30b-5p, hsa-miR-30c-5p, hsa-miR-98-5p	MAL2	UBXN8	SH3BP5-AS1	RP1-39G22.7	RP11-307C12.11	PXN-AS1	OTUD6B-AS1	LINC00649	EZH2	ATG12	SMAD5	CASP3	GPS1	PHB	COPS6
43	10	7	3	hsa-miR-122-5p, hsa-miR-125a-5p, hsa-miR-125b-5p, hsa-miR-128-3p, hsa-miR-135a-5p, hsa-miR-137, hsa-miR-144-3p, hsa-miR-145-5p, hsa-miR-155-5p, hsa-miR-199a-3p, hsa-miR-21-5p, hsa-miR-218-5p, hsa-miR-224-5p, hsa-miR-24-3p, hsa-miR-27a-3p, hsa-miR-27b-3p, hsa-miR-7-5p	TMEM254-AS1	RP11-736K20.5	RP11-71N10.1	RP11-250B2.3	RP11-197N18.2	KRTAP5-AS1	CTD-2292M16.8	EGFR	MAPK14	MTOR
44	5	3	2	hsa-miR-107, hsa-miR-138-5p, hsa-miR-155-5p, hsa-miR-199a-5p, hsa-miR-199b-5p, hsa-miR-22-3p, hsa-miR-27a-3p, hsa-miR-424-5p	TRPM2-AS	RP11-384K6.6	LINC01420	HIF1A	JAK1
45	12	8	4	hsa-miR-124-3p, hsa-miR-125a-3p, hsa-miR-135a-5p, hsa-miR-1-3p, hsa-miR-140-5p, hsa-miR-145-5p, hsa-miR-182-5p, hsa-miR-206, hsa-miR-20b-5p, hsa-miR-24-3p, hsa-miR-302a-3p, hsa-miR-34a-5p, hsa-miR-34b-3p, hsa-miR-34b-5p, hsa-miR-34c-5p, hsa-miR-371a-5p, hsa-miR-377-3p, hsa-miR-449a, hsa-miR-449b-5p, hsa-miR-486-5p, hsa-miR-522-3p	RP11-539I5.1	RP11-337C18.8	H1FX-AS1	SNHG9	RP11-661A12.4	HOXA11-AS	CTD-2015H6.3	AP006621.8	CDK4	STMN1	BRCA1	SOX2
46	6	3	3	hsa-miR-130a-3p, hsa-miR-130b-3p, hsa-miR-148a-3p, hsa-miR-148b-3p, hsa-miR-182-5p, hsa-miR-19a-3p, hsa-miR-19b-3p, hsa-miR-26a-5p, hsa-miR-26b-5p, hsa-miR-301a-3p, hsa-miR-31-5p, hsa-miR-454-3p	CTD-2574D22.2	AC005013.5	AC002310.12	SMAD4	ROCK1	ITPR1
47	11	7	4	hsa-miR-125a-5p, hsa-miR-125b-5p, hsa-miR-136-5p, hsa-miR-143-3p, hsa-miR-153-3p, hsa-miR-15a-5p, hsa-miR-15b-5p, hsa-miR-16-5p, hsa-miR-181a-5p, hsa-miR-181b-5p, hsa-miR-181d-5p, hsa-miR-18a-5p, hsa-miR-195-5p, hsa-miR-21-5p, hsa-miR-223-3p, hsa-miR-365a-3p, hsa-miR-448, hsa-miR-497-5p, hsa-miR-503-5p, hsa-miR-7-5p, hsa-miR-9-5p, hsa-miR-98-5p	FZD10-AS1	RP11-582J16.4	RP11-424G14.1	KLF3-AS1	AC093484.4	AC005224.2	AC004158.3	MCL1	BCL2	HK2	NCOA3
48	5	3	2	hsa-miR-143-3p, hsa-miR-145-5p, hsa-miR-199a-5p, hsa-miR-373-3p, hsa-miR-520a-3p, hsa-miR-520c-3p, hsa-miR-708-5p	DIO3OS	RP5-1142A6.2	BAIAP2-AS1	SMAD3	CD44
49	4	2	2	hsa-miR-18a-5p, hsa-miR-18b-5p, hsa-miR-19b-3p, hsa-miR-206, hsa-miR-26a-5p, hsa-miR-26b-5p, hsa-miR-613	MORF4L2-AS1	ARHGAP5-AS1	ESR1	ABCA1
50	7	5	2	hsa-miR-30a-5p, hsa-miR-30b-5p, hsa-miR-30c-5p, hsa-miR-30d-5p, hsa-miR-30e-5p	AC002064.5	RP4-647C14.3	RP11-400L8.2	LINC01091	AC097721.2	BCL9	MBNL3
51	9	6	3	hsa-miR-103a-3p, hsa-miR-106b-5p, hsa-miR-107, hsa-miR-10a-5p, hsa-miR-10b-5p, hsa-miR-128-3p, hsa-miR-130a-3p, hsa-miR-130a-5p, hsa-miR-130b-3p, hsa-miR-142-5p, hsa-miR-148b-3p, hsa-miR-152-3p, hsa-miR-153-3p, hsa-miR-155-5p, hsa-miR-181a-5p, hsa-miR-181b-5p, hsa-miR-181c-5p, hsa-miR-190b, hsa-miR-205-5p, hsa-miR-20a-5p, hsa-miR-23a-3p, hsa-miR-23b-3p, hsa-miR-27b-3p, hsa-miR-301a-3p, hsa-miR-30…	RP11-627G23.1	RP11-158K1.3	RP11-111K18.2	PSMD6-AS2	MIR4500HG	AC084809.2	PTEN	CXCL12	CSF1
52	4	2	2	hsa-miR-141-3p, hsa-miR-142-3p, hsa-miR-145-5p, hsa-miR-15a-5p, hsa-miR-200a-3p, hsa-miR-22-3p, hsa-miR-296-5p, hsa-miR-320a, hsa-miR-365a-3p, hsa-miR-708-5p, hsa-miR-9-5p	LINC00645	AC093323.3	HMGB1	CCND1
53	8	6	2	hsa-miR-128-3p, hsa-miR-132-3p, hsa-miR-141-3p, hsa-miR-148a-3p, hsa-miR-18a-5p, hsa-miR-18b-5p, hsa-miR-200a-3p, hsa-miR-206, hsa-miR-212-3p, hsa-miR-224-5p, hsa-miR-27a-3p, hsa-miR-27b-3p, hsa-miR-425-5p, hsa-miR-484	RP11-714G18.1	RP11-552M11.4	RP11-46C24.6	LINC01021	CTC-484P3.3	BCDIN3D-AS1	PHLPP1	SMAD2
54	6	2	4	hsa-miR-106a-5p, hsa-miR-17-5p, hsa-miR-20a-5p, hsa-miR-302a-3p, hsa-miR-302d-3p, hsa-miR-372-3p, hsa-miR-373-3p, hsa-miR-93-5p	RP3-508I15.18	CTD-2377D24.6	LATS2	SIRPA	LEFTY1	LEFTY2
55	6	4	2	hsa-miR-143-3p, hsa-miR-145-5p, hsa-miR-194-5p, hsa-miR-199a-5p, hsa-miR-199b-5p, hsa-miR-214-3p, hsa-miR-21-5p, hsa-miR-26a-5p, hsa-miR-338-3p, hsa-miR-34a-5p, hsa-miR-410-3p, hsa-miR-506-3p	RP11-379I19.1	OGFR-AS1	MIR181A1HG	CTC-338M12.4	CDH2	JAG1

## Sheet: Enriched terms in differential
	Significant GO terms											Significant KEGG terms
	ID	Description	GeneRatio	BgRatio	pvalue	p.adjust	qvalue	geneID	Count			ID	Description	GeneRatio	BgRatio	pvalue	p.adjust	qvalue	geneID	Count
Module 1	GO:0045785	positive regulation of cell adhesion	2018-03-03	394/17381	1.15618e-05	0.00195527	0.000285292	54361/3135/3170	3		Module 3	hsa04066	HIF-1 signaling pathway	2018-04-15	100/7322	3.9837e-05	0.00294794	0.00226442	3939/285/7076/1978	4
	GO:0040019	positive regulation of embryonic development	2018-02-03	38/17381	1.39438e-05	0.00195527	0.000285292	54361/3170	2			hsa04933	AGE-RAGE signaling pathway in diabetic complications	2018-03-15	99/7322	0.000969551	0.0358734	0.0275557	2335/6776/6772	3
	GO:0022407	regulation of cell-cell adhesion	2018-03-03	425/17381	1.45193e-05	0.00195527	0.000285292	54361/3135/3170	3		Module 6	hsa04922	Glucagon signaling pathway	2018-02-05	103/7322	0.00190638	0.0327716	0.0220777	5562/3945	2
	GO:0045995	regulation of embryonic development	2018-02-03	124/17381	0.00015076	0.0115757	0.00168901	54361/3170	2			hsa04152	AMPK signaling pathway	2018-02-05	121/7322	0.00262172	0.0327716	0.0220777	5562/51552	2
	GO:0035270	endocrine system development	2018-02-03	127/17381	0.000158155	0.0115757	0.00168901	54361/3170	2		Module 7	hsa04668	TNF signaling pathway	2018-07-17	108/7322	2.15137e-09	2.43105e-07	1.51728e-07	2920/3976/5743/9021/6352/4790/355	7
	GO:0001837	epithelial to mesenchymal transition	2018-02-03	134/17381	0.000176096	0.0115757	0.00168901	54361/3170	2			hsa04064	NF-kappa B signaling pathway	2018-05-17	95/7322	1.80933e-06	0.000102227	6.38027e-05	2920/5743/4790/3654/5328	5
	GO:0061041	regulation of wound healing	2018-02-03	143/17381	0.00020057	0.0115757	0.00168901	54361/3170	2			hsa05167	Kaposi's sarcoma-associated herpesvirus infection	2018-05-17	186/7322	4.8391e-05	0.00182273	0.00113761	2920/5743/6714/4790/355	5
	GO:1903034	regulation of response to wounding	2018-02-03	168/17381	0.000276852	0.0130034	0.00189732	54361/3170	2			hsa05142	Chagas disease (American trypanosomiasis)	2018-04-17	102/7322	7.34995e-05	0.00207636	0.00129591	6352/4790/3654/355	4
	GO:0042098	T cell proliferation	2018-02-03	181/17381	0.000321333	0.0130034	0.00189732	54361/3135	2			hsa04010	MAPK signaling pathway	2018-05-17	294/7322	0.000419104	0.00745224	0.00465114	4790/3654/1843/355/1942	5
	GO:0031669	cellular response to nutrient levels	2018-02-03	186/17381	0.000339317	0.0130034	0.00189732	54361/3170	2			hsa05120	Epithelial cell signaling in Helicobacter pylori infection	2018-03-17	68/7322	0.00047466	0.00745224	0.00465114	6714/6352/4790	3
	GO:0048762	mesenchymal cell differentiation	2018-02-03	190/17381	0.000354053	0.0130034	0.00189732	54361/3170	2			hsa04917	Prolactin signaling pathway	2018-03-17	70/7322	0.000516967	0.00745224	0.00465114	9021/6714/4790	3
	GO:0031668	cellular response to extracellular stimulus	2018-02-03	215/17381	0.000453196	0.0152576	0.00222622	54361/3170	2			hsa05164	Influenza A	2018-04-17	173/7322	0.000563103	0.00745224	0.00465114	9021/6352/4790/355	4
	GO:0030217	T cell differentiation	2018-02-03	225/17381	0.000496245	0.0154218	0.00225018	54361/3135	2			hsa05140	Leishmaniasis	2018-03-17	74/7322	0.000608692	0.00745224	0.00465114	5743/4790/3654	3
	GO:0060485	mesenchyme development	2018-02-03	246/17381	0.000592944	0.0160226	0.00233785	54361/3170	2			hsa04062	Chemokine signaling pathway	2018-04-17	185/7322	0.000725439	0.00745224	0.00465114	2920/6714/6352/4790	4
	GO:0045165	cell fate commitment	2018-02-03	253/17381	0.00062707	0.0160226	0.00233785	54361/3170	2			hsa05168	Herpes simplex infection	2018-04-17	185/7322	0.000725439	0.00745224	0.00465114	9021/6352/4790/355	4
	GO:0022409	positive regulation of cell-cell adhesion	2018-02-03	259/17381	0.000657073	0.0160226	0.00233785	3135/3170	2			hsa04657	IL-17 signaling pathway	2018-03-17	93/7322	0.00118568	0.0111651	0.00696844	2920/5743/4790	3
	GO:0046651	lymphocyte proliferation	2018-02-03	268/17381	0.000703378	0.0160226	0.00233785	54361/3135	2			hsa04620	Toll-like receptor signaling pathway	2018-03-17	104/7322	0.00163779	0.0142362	0.00888519	6352/4790/3654	3
	GO:0032943	mononuclear cell proliferation	2018-02-03	270/17381	0.000713879	0.0160226	0.00233785	54361/3135	2			hsa04060	Cytokine-cytokine receptor interaction	2018-04-17	270/7322	0.00294273	0.0233501	0.0145734	2920/3976/6352/355	4
	GO:0070661	leukocyte proliferation	2018-02-03	286/17381	0.000800664	0.0163995	0.00239284	54361/3135	2			hsa04926	Relaxin signaling pathway	2018-03-17	130/7322	0.00309957	0.0233501	0.0145734	59/6714/4790	3
	GO:0071496	cellular response to external stimulus	2018-02-03	288/17381	0.000811858	0.0163995	0.00239284	54361/3170	2			hsa05162	Measles	2018-03-17	134/7322	0.00337747	0.0238534	0.0148876	4790/3654/355	3
	GO:0030098	lymphocyte differentiation	2018-02-03	328/17381	0.00105185	0.0202356	0.00295256	54361/3135	2			hsa05418	Fluid shear stress and atherosclerosis	2018-03-17	139/7322	0.00374589	0.0248991	0.0155402	6714/4790/1843	3
	GO:0032352	positive regulation of hormone metabolic process	2018-01-03	10/17381	0.00172513	0.0220947	0.00322382	54361	1			hsa05161	Hepatitis B	2018-03-17	144/7322	0.00413814	0.0252979	0.0157891	6714/4790/355	3
	GO:0033131	regulation of glucokinase activity	2018-01-03	10/17381	0.00172513	0.0220947	0.00322382	3170	1			hsa05206	MicroRNAs in cancer	2018-04-17	299/7322	0.00425363	0.0252979	0.0157891	5292/5743/4790/5328	4
	GO:0072173	metanephric tubule morphogenesis	2018-01-03	10/17381	0.00172513	0.0220947	0.00322382	54361	1			hsa04932	Non-alcoholic fatty liver disease (NAFLD)	2018-03-17	149/7322	0.00455473	0.0257342	0.0160614	9021/4790/355	3
	GO:2001198	regulation of dendritic cell differentiation	2018-01-03	10/17381	0.00172513	0.0220947	0.00322382	3135	1			hsa04630	Jak-STAT signaling pathway	2018-03-17	162/7322	0.00575495	0.0309671	0.0193274	5292/3976/9021	3
	GO:0031667	response to nutrient levels	2018-02-03	426/17381	0.00176878	0.0220947	0.00322382	54361/3170	2			hsa04621	NOD-like receptor signaling pathway	2018-03-17	168/7322	0.00636749	0.0327058	0.0204125	2920/6352/4790	3
	GO:0002664	regulation of T cell tolerance induction	2018-01-03	11/17381	0.00189753	0.0220947	0.00322382	3135	1			hsa05134	Legionellosis	2018-02-17	55/7322	0.00700949	0.0344379	0.0214936	2920/4790	2
	GO:0006702	androgen biosynthetic process	2018-01-03	11/17381	0.00189753	0.0220947	0.00322382	54361	1			hsa05152	Tuberculosis	2018-03-17	179/7322	0.00758949	0.0357339	0.0223025	6714/4790/3654	3
	GO:0090009	primitive streak formation	2018-01-03	11/17381	0.00189753	0.0220947	0.00322382	3170	1			hsa04370	VEGF signaling pathway	2018-02-17	59/7322	0.00803239	0.0363064	0.0226598	5743/6714	2
	GO:1903299	regulation of hexokinase activity	2018-01-03	11/17381	0.00189753	0.0220947	0.00322382	3170	1			hsa04623	Cytosolic DNA-sensing pathway	2018-02-17	64/7322	0.00940003	0.039603	0.0247173	6352/4790	2
	GO:2000047	regulation of cell-cell adhesion mediated by cadherin	2018-01-03	11/17381	0.00189753	0.0220947	0.00322382	3170	1			hsa05131	Shigellosis	2018-02-17	65/7322	0.00968525	0.039603	0.0247173	6714/4790	2
	GO:0009991	response to extracellular stimulus	2018-02-03	457/17381	0.00203344	0.0220947	0.00322382	54361/3170	2			hsa05221	Acute myeloid leukemia	2018-02-17	66/7322	0.00997433	0.039603	0.0247173	5292/4790	2
	GO:0006705	mineralocorticoid biosynthetic process	2018-01-03	12/17381	0.00206992	0.0220947	0.00322382	54361	1			hsa04115	p53 signaling pathway	2018-02-17	68/7322	0.010564	0.039603	0.0247173	6477/355	2
	GO:0008212	mineralocorticoid metabolic process	2018-01-03	12/17381	0.00206992	0.0220947	0.00322382	54361	1			hsa05205	Proteoglycans in cancer	2018-03-17	203/7322	0.0107158	0.039603	0.0247173	6714/5328/355	3
	GO:0045591	positive regulation of regulatory T cell differentiation	2018-01-03	12/17381	0.00206992	0.0220947	0.00322382	3135	1			hsa04920	Adipocytokine signaling pathway	2018-02-17	69/7322	0.0108646	0.039603	0.0247173	9021/4790	2
	GO:0045836	positive regulation of meiotic nuclear division	2018-01-03	12/17381	0.00206992	0.0220947	0.00322382	54361	1			hsa05133	Pertussis	2018-02-17	76/7322	0.0130736	0.046166	0.0288134	4790/3654	2
	GO:2000543	positive regulation of gastrulation	2018-01-03	12/17381	0.00206992	0.0220947	0.00322382	3170	1		Module 8	hsa05031	Amphetamine addiction	2018-02-03	68/7322	0.000253447	0.0144465	0.00586929	2353/3065	2
	GO:0042110	T cell activation	2018-02-03	467/17381	0.00212267	0.0220947	0.00322382	54361/3135	2			hsa04919	Thyroid hormone signaling pathway	2018-02-03	116/7322	0.00073883	0.015107	0.00613764	3690/3065	2
	GO:0002521	leukocyte differentiation	2018-02-03	479/17381	0.00223223	0.0220947	0.00322382	54361/3135	2			hsa04380	Osteoclast differentiation	2018-02-03	128/7322	0.000899337	0.015107	0.00613764	3690/2353	2
	GO:0002517	T cell tolerance induction	2018-01-03	13/17381	0.00224228	0.0220947	0.00322382	3135	1			hsa05418	Fluid shear stress and atherosclerosis	2018-02-03	139/7322	0.00106014	0.015107	0.00613764	3690/2353	2
	GO:0010566	regulation of ketone biosynthetic process	2018-01-03	13/17381	0.00224228	0.0220947	0.00322382	54361	1		Module 9	hsa04926	Relaxin signaling pathway	2018-02-02	130/7322	0.000312848	0.0065698	0.00197588	4318/1277	2
	GO:0010817	regulation of hormone levels	2018-02-03	486/17381	0.00229739	0.0220987	0.00322441	54361/3170	2		Module 11	hsa05131	Shigellosis	2018-02-05	65/7322	0.000762783	0.0228835	0.0176644	63916/9475	2
	GO:0010893	positive regulation of steroid biosynthetic process	2018-01-03	14/17381	0.00241462	0.0221706	0.0032349	54361	1		Module 12	hsa04657	IL-17 signaling pathway	2018-04-06	93/7322	3.58915e-07	7.17831e-06	4.91147e-06	8061/4312/1051/4322	4
	GO:0021984	adenohypophysis development	2018-01-03	14/17381	0.00241462	0.0221706	0.0032349	54361	1			hsa04926	Relaxin signaling pathway	2018-02-06	130/7322	0.00447813	0.0447813	0.0306398	4312/4322	2
	GO:0044331	cell-cell adhesion mediated by cadherin	2018-01-03	15/17381	0.00258695	0.0222368	0.00324455	3170	1		Module 13	hsa04974	Protein digestion and absorption	2018-02-02	90/7322	0.000149428	0.000149428	NA	1290/1300	2
	GO:0046184	aldehyde biosynthetic process	2018-01-03	15/17381	0.00258695	0.0222368	0.00324455	54361	1		Module 15	hsa05416	Viral myocarditis	2018-02-07	59/7322	0.0013062	0.0424321	0.037373	857/841	2
	GO:0072075	metanephric mesenchyme development	2018-01-03	15/17381	0.00258695	0.0222368	0.00324455	54361	1			hsa04115	p53 signaling pathway	2018-02-07	68/7322	0.00173192	0.0424321	0.037373	5054/841	2
	GO:0046885	regulation of hormone biosynthetic process	2018-01-03	16/17381	0.00275925	0.0227758	0.0033232	54361	1		Module 17	hsa04218	Cellular senescence	2018-04-14	160/7322	0.00018529	0.0168614	0.0124827	5606/10114/1647/7040	4
	GO:0002643	regulation of tolerance induction	2018-01-03	17/17381	0.00293154	0.0227758	0.0033232	3135	1			hsa05323	Rheumatoid arthritis	2018-03-14	90/7322	0.000592695	0.0229597	0.0169974	3383/3589/7040	3
	GO:0006704	glucocorticoid biosynthetic process	2018-01-03	17/17381	0.00293154	0.0227758	0.0033232	54361	1			hsa04933	AGE-RAGE signaling pathway in diabetic complications	2018-03-14	99/7322	0.000783299	0.0229597	0.0169974	3383/4846/7040	3
	GO:0040037	negative regulation of fibroblast growth factor receptor signaling pathway	2018-01-03	17/17381	0.00293154	0.0227758	0.0033232	54361	1			hsa04668	TNF signaling pathway	2018-03-14	108/7322	0.00100922	0.0229597	0.0169974	3383/5606/840	3
	GO:0051446	positive regulation of meiotic cell cycle	2018-01-03	17/17381	0.00293154	0.0227758	0.0033232	54361	1			hsa04010	MAPK signaling pathway	2018-04-14	294/7322	0.00185211	0.0337085	0.0249548	5606/7786/1647/7040	4
	GO:0072074	kidney mesenchyme development	2018-01-03	19/17381	0.00327605	0.0238212	0.00347573	54361	1			hsa04672	Intestinal immune network for IgA production	2018-02-14	49/7322	0.00379295	0.0493083	0.0365035	7852/7040	2
	GO:0072077	renal vesicle morphogenesis	2018-01-03	19/17381	0.00327605	0.0238212	0.00347573	54361	1			hsa05144	Malaria	2018-02-14	49/7322	0.00379295	0.0493083	0.0365035	3383/7040	2
	GO:1905939	regulation of gonad development	2018-01-03	19/17381	0.00327605	0.0238212	0.00347573	54361	1		Module 23	hsa05226	Gastric cancer	2018-04-19	153/7322	0.000556268	0.0474994	0.0408328	8503/8323/2254/7015	4
	GO:0060231	mesenchymal to epithelial transition	2018-01-03	20/17381	0.00344827	0.0238212	0.00347573	54361	1			hsa05225	Hepatocellular carcinoma	2018-04-19	168/7322	0.000791657	0.0474994	0.0408328	8503/8323/7015/6597	4
	GO:0072087	renal vesicle development	2018-01-03	20/17381	0.00344827	0.0238212	0.00347573	54361	1		Module 24	hsa05142	Chagas disease (American trypanosomiasis)	2018-03-10	102/7322	0.000293391	0.0100059	0.00697007	5520/51135/7189	3
	GO:0030325	adrenal gland development	2018-01-03	22/17381	0.00379266	0.0238212	0.00347573	54361	1			hsa04620	Toll-like receptor signaling pathway	2018-03-10	104/7322	0.00031072	0.0100059	0.00697007	51135/7189/1326	3
	GO:0072170	metanephric tubule development	2018-01-03	22/17381	0.00379266	0.0238212	0.00347573	54361	1			hsa04010	MAPK signaling pathway	2018-04-10	294/7322	0.000441438	0.0100059	0.00697007	3479/51135/7189/1326	4
	GO:0007530	sex determination	2018-01-03	23/17381	0.00396483	0.0238212	0.00347573	54361	1		Module 27	hsa04974	Protein digestion and absorption	2018-02-08	90/7322	0.00398722	0.0432512	0.0337241	1281/1278	2
	GO:0010894	negative regulation of steroid biosynthetic process	2018-01-03	23/17381	0.00396483	0.0238212	0.00347573	54361	1			hsa05146	Amoebiasis	2018-02-08	96/7322	0.00452485	0.0432512	0.0337241	1281/1278	2
	GO:0045940	positive regulation of steroid metabolic process	2018-01-03	23/17381	0.00396483	0.0238212	0.00347573	54361	1			hsa04933	AGE-RAGE signaling pathway in diabetic complications	2018-02-08	99/7322	0.00480569	0.0432512	0.0337241	1281/1278	2
	GO:0060444	branching involved in mammary gland duct morphogenesis	2018-01-03	23/17381	0.00396483	0.0238212	0.00347573	54361	1			hsa04611	Platelet activation	2018-02-08	123/7322	0.00733571	0.0440997	0.0343857	1281/1278	2
	GO:0008211	glucocorticoid metabolic process	2018-01-03	24/17381	0.00413697	0.0238212	0.00347573	54361	1			hsa04926	Relaxin signaling pathway	2018-02-08	130/7322	0.0081666	0.0440997	0.0343857	1281/1278	2
	GO:0032967	positive regulation of collagen biosynthetic process	2018-01-03	24/17381	0.00413697	0.0238212	0.00347573	54361	1		Module 29	hsa05020	Prion diseases	2018-02-02	35/7322	2.21997e-05	0.00166498	0.000210313	4851/5604	2
	GO:0051894	positive regulation of focal adhesion assembly	2018-01-03	24/17381	0.00413697	0.0238212	0.00347573	54361	1			hsa01522	Endocrine resistance	2018-02-02	96/7322	0.000170135	0.00622151	0.000785875	4851/5604	2
	GO:0002507	tolerance induction	2018-01-03	25/17381	0.0043091	0.0238212	0.00347573	3135	1			hsa04919	Thyroid hormone signaling pathway	2018-02-02	116/7322	0.00024886	0.00622151	0.000785875	4851/5604	2
	GO:0006700	C21-steroid hormone biosynthetic process	2018-01-03	25/17381	0.0043091	0.0238212	0.00347573	54361	1			hsa05224	Breast cancer	2018-02-02	151/7322	0.00042254	0.00792263	0.00100075	4851/5604	2
	GO:0010714	positive regulation of collagen metabolic process	2018-01-03	25/17381	0.0043091	0.0238212	0.00347573	54361	1			hsa05206	MicroRNAs in cancer	2018-02-02	299/7322	0.00166222	0.0236553	0.00298803	4851/5604	2
	GO:0032350	regulation of hormone metabolic process	2018-01-03	25/17381	0.0043091	0.0238212	0.00347573	54361	1			hsa05165	Human papillomavirus infection	2018-02-02	319/7322	0.00189242	0.0236553	0.00298803	4851/5604	2
	GO:0044253	positive regulation of multicellular organismal metabolic process	2018-01-03	25/17381	0.0043091	0.0238212	0.00347573	54361	1		Module 31	hsa04141	Protein processing in endoplasmic reticulum	2018-02-02	165/7322	0.00050481	0.0287742	0.00318827	5601/55432	2
	GO:0045939	negative regulation of steroid metabolic process	2018-01-03	25/17381	0.0043091	0.0238212	0.00347573	54361	1		Module 33	hsa04630	Jak-STAT signaling pathway	2018-02-02	162/7322	0.000486565	0.00389252	NA	3596/4352	2
	GO:0072202	cell differentiation involved in metanephros development	2018-01-03	25/17381	0.0043091	0.0238212	0.00347573	54361	1			hsa04060	Cytokine-cytokine receptor interaction	2018-02-02	270/7322	0.00135493	0.00541971	NA	3596/4352	2
	GO:0072207	metanephric epithelium development	2018-01-03	26/17381	0.00448121	0.0238212	0.00347573	54361	1			hsa05310	Asthma	2018-01-02	31/7322	0.00845028	0.0225341	NA	3596	1
	GO:0072273	metanephric nephron morphogenesis	2018-01-03	26/17381	0.00448121	0.0238212	0.00347573	54361	1			hsa05321	Inflammatory bowel disease (IBD)	2018-01-02	65/7322	0.0176771	0.0288495	NA	3596	1
	GO:1903393	positive regulation of adherens junction organization	2018-01-03	26/17381	0.00448121	0.0238212	0.00347573	54361	1			hsa04664	Fc epsilon RI signaling pathway	2018-01-02	68/7322	0.0184892	0.0288495	NA	3596	1
	GO:0001702	gastrulation with mouth forming second	2018-01-03	28/17381	0.00482536	0.0243681	0.00355553	3170	1			hsa04658	Th1 and Th2 cell differentiation	2018-01-02	92/7322	0.0249736	0.0288495	NA	3596	1
	GO:0008209	androgen metabolic process	2018-01-03	28/17381	0.00482536	0.0243681	0.00355553	54361	1			hsa04657	IL-17 signaling pathway	2018-01-02	93/7322	0.0252433	0.0288495	NA	3596	1
	GO:0045589	regulation of regulatory T cell differentiation	2018-01-03	28/17381	0.00482536	0.0243681	0.00355553	3135	1			hsa05162	Measles	2018-01-02	134/7322	0.0362695	0.0362695	NA	3596	1
	GO:1901522	positive regulation of transcription from RNA polymerase II promoter involved in cellular response to chemical stimulus	2018-01-03	28/17381	0.00482536	0.0243681	0.00355553	3170	1		Module 34	hsa05206	MicroRNAs in cancer	2018-02-02	299/7322	0.00166222	0.0216088	0.0069988	10018/9759	2
	GO:0010719	negative regulation of epithelial to mesenchymal transition	2018-01-03	29/17381	0.00499741	0.0245221	0.003578	3170	1		Module 35	hsa04611	Platelet activation	2018-04-11	123/7322	2.28469e-05	0.00164498	0.00149106	2244/2243/3688/2266	4
	GO:0031128	developmental induction	2018-01-03	30/17381	0.00516943	0.0245221	0.003578	54361	1			hsa04610	Complement and coagulation cascades	2018-03-11	79/7322	0.000187439	0.00674782	0.00611644	2244/2243/2266	3
	GO:0040020	regulation of meiotic nuclear division	2018-01-03	30/17381	0.00516943	0.0245221	0.003578	54361	1			hsa00270	Cysteine and methionine metabolism	2018-02-11	45/7322	0.00196117	0.047068	0.042664	1789/1788	2
	GO:0045066	regulatory T cell differentiation	2018-01-03	30/17381	0.00516943	0.0245221	0.003578	3135	1		Module 36	hsa04392	Hippo signaling pathway - multiple species	2018-01-01	29/7322	0.00396067	0.0334083	NA	5058	1
	GO:0070741	response to interleukin-6	2018-01-03	30/17381	0.00516943	0.0245221	0.003578	3170	1			hsa05120	Epithelial cell signaling in Helicobacter pylori infection	2018-01-01	68/7322	0.00928708	0.0334083	NA	5058	1
	GO:0040036	regulation of fibroblast growth factor receptor signaling pathway	2018-01-03	31/17381	0.00534144	0.0245221	0.003578	54361	1			hsa05211	Renal cell carcinoma	2018-01-01	69/7322	0.00942365	0.0334083	NA	5058	1
	GO:0060603	mammary gland duct morphogenesis	2018-01-03	31/17381	0.00534144	0.0245221	0.003578	54361	1			hsa04012	ErbB signaling pathway	2018-01-01	86/7322	0.0117454	0.0334083	NA	5058	1
	GO:1901890	positive regulation of cell junction assembly	2018-01-03	31/17381	0.00534144	0.0245221	0.003578	54361	1			hsa04666	Fc gamma R-mediated phagocytosis	2018-01-01	91/7322	0.0124283	0.0334083	NA	5058	1
	GO:0032735	positive regulation of interleukin-12 production	2018-01-03	32/17381	0.00551343	0.0250272	0.00365171	3135	1			hsa04660	T cell receptor signaling pathway	2018-01-01	103/7322	0.0140672	0.0334083	NA	5058	1
	GO:0003338	metanephros morphogenesis	2018-01-03	33/17381	0.00568539	0.0255211	0.00372377	54361	1			hsa04650	Natural killer cell mediated cytotoxicity	2018-01-01	133/7322	0.0181644	0.0334083	NA	5058	1
	GO:1905332	positive regulation of morphogenesis of an epithelium	2018-01-03	34/17381	0.00585734	0.026004	0.00379423	54361	1			hsa04360	Axon guidance	2018-01-01	175/7322	0.0239006	0.0334083	NA	5058	1
	GO:0030501	positive regulation of bone mineralization	2018-01-03	35/17381	0.00602927	0.0264764	0.00386315	54361	1			hsa04062	Chemokine signaling pathway	2018-01-01	185/7322	0.0252663	0.0334083	NA	5058	1
	GO:0008207	C21-steroid hormone metabolic process	2018-01-03	36/17381	0.00620118	0.0269384	0.00393057	54361	1			hsa04024	cAMP signaling pathway	2018-01-01	198/7322	0.0270418	0.0334083	NA	5058	1
	GO:0071542	dopaminergic neuron differentiation	2018-01-03	37/17381	0.00637306	0.0273906	0.00399655	3170	1			hsa04510	Focal adhesion	2018-01-01	199/7322	0.0271784	0.0334083	NA	5058	1
	GO:0010677	negative regulation of cellular carbohydrate metabolic process	2018-01-03	38/17381	0.00654493	0.02783	0.00406065	3170	1			hsa05205	Proteoglycans in cancer	2018-01-01	203/7322	0.0277247	0.0334083	NA	5058	1
	GO:0032965	regulation of collagen biosynthetic process	2018-01-03	39/17381	0.00671678	0.02783	0.00406065	54361	1			hsa04810	Regulation of actin cytoskeleton	2018-01-01	212/7322	0.0289538	0.0334083	NA	5058	1
	GO:0031670	cellular response to nutrient	2018-01-03	40/17381	0.00688861	0.02783	0.00406065	3170	1			hsa04014	Ras signaling pathway	2018-01-01	236/7322	0.0322316	0.0345339	NA	5058	1
	GO:0042181	ketone biosynthetic process	2018-01-03	40/17381	0.00688861	0.02783	0.00406065	54361	1			hsa04010	MAPK signaling pathway	2018-01-01	294/7322	0.040153	0.040153	NA	5058	1
	GO:0070169	positive regulation of biomineral tissue development	2018-01-03	40/17381	0.00688861	0.02783	0.00406065	54361	1		Module 38	hsa05206	MicroRNAs in cancer	2018-05-05	299/7322	1.09952e-07	8.46629e-06	6.13415e-06	10642/8091/10253/8660/3265	5
	GO:0090184	positive regulation of kidney development	2018-01-03	40/17381	0.00688861	0.02783	0.00406065	54361	1			hsa04213	Longevity regulating pathway - multiple species	2018-02-05	62/7322	0.000694043	0.0267207	0.0193602	8660/3265	2
	GO:0045912	negative regulation of carbohydrate metabolic process	2018-01-03	41/17381	0.00706042	0.0279648	0.00408032	3170	1			hsa04211	Longevity regulating pathway	2018-02-05	89/7322	0.00142665	0.0366173	0.0265307	8660/3265	2
	GO:0097028	dendritic cell differentiation	2018-01-03	41/17381	0.00706042	0.0279648	0.00408032	3135	1			hsa04140	Autophagy - animal	2018-02-05	128/7322	0.00292952	0.0436038	0.0315926	8660/3265	2
	GO:0072210	metanephric nephron development	2018-01-03	42/17381	0.00723221	0.0281979	0.00411434	54361	1			hsa04068	FoxO signaling pathway	2018-02-05	132/7322	0.00311278	0.0436038	0.0315926	8660/3265	2
	GO:0010470	regulation of gastrulation	2018-01-03	43/17381	0.00740398	0.0281979	0.00411434	3170	1			hsa04910	Insulin signaling pathway	2018-02-05	138/7322	0.0033977	0.0436038	0.0315926	8660/3265	2
	GO:0021983	pituitary gland development	2018-01-03	43/17381	0.00740398	0.0281979	0.00411434	54361	1		Module 39	hsa04720	Long-term potentiation	2018-01-01	67/7322	0.00915051	0.0335974	NA	5908	1
	GO:0010712	regulation of collagen metabolic process	2018-01-03	44/17381	0.00757573	0.0281979	0.00411434	54361	1			hsa05211	Renal cell carcinoma	2018-01-01	69/7322	0.00942365	0.0335974	NA	5908	1
	GO:0051445	regulation of meiotic cell cycle	2018-01-03	44/17381	0.00757573	0.0281979	0.00411434	54361	1			hsa04972	Pancreatic secretion	2018-01-01	96/7322	0.0131112	0.0335974	NA	5908	1
	GO:0031018	endocrine pancreas development	2018-01-03	45/17381	0.00774745	0.0281979	0.00411434	3170	1			hsa04670	Leukocyte transendothelial migration	2018-01-01	112/7322	0.0152964	0.0335974	NA	5908	1
	GO:0044246	regulation of multicellular organismal metabolic process	2018-01-03	45/17381	0.00774745	0.0281979	0.00411434	54361	1			hsa04722	Neurotrophin signaling pathway	2018-01-01	119/7322	0.0162524	0.0335974	NA	5908	1
	GO:0048599	oocyte development	2018-01-03	45/17381	0.00774745	0.0281979	0.00411434	54361	1			hsa04611	Platelet activation	2018-01-01	123/7322	0.0167987	0.0335974	NA	5908	1
	GO:0060443	mammary gland morphogenesis	2018-01-03	45/17381	0.00774745	0.0281979	0.00411434	54361	1			hsa04062	Chemokine signaling pathway	2018-01-01	185/7322	0.0252663	0.0344168	NA	5908	1
	GO:0001954	positive regulation of cell-matrix adhesion	2018-01-03	46/17381	0.00791916	0.0284235	0.00414726	54361	1			hsa04024	cAMP signaling pathway	2018-01-01	198/7322	0.0270418	0.0344168	NA	5908	1
	GO:0002067	glandular epithelial cell differentiation	2018-01-03	47/17381	0.00809085	0.0284235	0.00414726	54361	1			hsa04510	Focal adhesion	2018-01-01	199/7322	0.0271784	0.0344168	NA	5908	1
	GO:0032964	collagen biosynthetic process	2018-01-03	47/17381	0.00809085	0.0284235	0.00414726	54361	1			hsa04015	Rap1 signaling pathway	2018-01-01	210/7322	0.0286807	0.0344168	NA	5908	1
	GO:0051496	positive regulation of stress fiber assembly	2018-01-03	47/17381	0.00809085	0.0284235	0.00414726	54361	1			hsa04014	Ras signaling pathway	2018-01-01	236/7322	0.0322316	0.0351618	NA	5908	1
	GO:0009994	oocyte differentiation	2018-01-03	48/17381	0.00826252	0.0285304	0.00416286	54361	1			hsa04010	MAPK signaling pathway	2018-01-01	294/7322	0.040153	0.040153	NA	5908	1
	GO:0060563	neuroepithelial cell differentiation	2018-01-03	48/17381	0.00826252	0.0285304	0.00416286	54361	1		Module 40	hsa04668	TNF signaling pathway	2018-02-02	108/7322	0.000215579	0.0141301	0.00174986	207/7128	2
	GO:0051055	negative regulation of lipid biosynthetic process	2018-01-03	49/17381	0.00843417	0.0288763	0.00421333	54361	1			hsa05162	Measles	2018-02-02	134/7322	0.000332473	0.0141301	0.00174986	207/7128	2
	GO:0032655	regulation of interleukin-12 production	2018-01-03	50/17381	0.0086058	0.0292163	0.00426294	3135	1			hsa05169	Epstein-Barr virus infection	2018-02-02	203/7322	0.000764975	0.0216743	0.00268412	207/7128	2
	GO:0009948	anterior/posterior axis specification	2018-01-03	51/17381	0.00877742	0.0294101	0.00429121	3170	1		Module 41	hsa05206	MicroRNAs in cancer	2018-02-02	299/7322	0.00166222	0.0482042	0.0122479	4609/6624	2
	GO:0032615	interleukin-12 production	2018-01-03	52/17381	0.00894901	0.0294101	0.00429121	3135	1		Module 43	hsa01522	Endocrine resistance	2018-03-03	96/7322	2.1848e-06	0.000192262	4.82956e-05	1956/1432/2475	3
	GO:0061178	regulation of insulin secretion involved in cellular response to glucose stimulus	2018-01-03	52/17381	0.00894901	0.0294101	0.00429121	3170	1			hsa05205	Proteoglycans in cancer	2018-03-03	203/7322	2.10055e-05	0.00092424	0.000232166	1956/1432/2475	3
	GO:0051893	regulation of focal adhesion assembly	2018-01-03	54/17381	0.00929213	0.0294101	0.00429121	54361	1			hsa05230	Central carbon metabolism in cancer	2018-02-03	65/7322	0.000231481	0.00402684	0.00101153	1956/2475	2
	GO:0061005	cell differentiation involved in kidney development	2018-01-03	54/17381	0.00929213	0.0294101	0.00429121	54361	1			hsa05120	Epithelial cell signaling in Helicobacter pylori infection	2018-02-03	68/7322	0.000253447	0.00402684	0.00101153	1956/1432	2
	GO:0090109	regulation of cell-substrate junction assembly	2018-01-03	54/17381	0.00929213	0.0294101	0.00429121	54361	1			hsa05214	Glioma	2018-02-03	71/7322	0.000276401	0.00402684	0.00101153	1956/2475	2
	GO:0090183	regulation of kidney development	2018-01-03	54/17381	0.00929213	0.0294101	0.00429121	54361	1			hsa05212	Pancreatic cancer	2018-02-03	75/7322	0.000308544	0.00402684	0.00101153	1956/2475	2
	GO:2000242	negative regulation of reproductive process	2018-01-03	54/17381	0.00929213	0.0294101	0.00429121	54361	1			hsa01521	EGFR tyrosine kinase inhibitor resistance	2018-02-03	79/7322	0.000342442	0.00402684	0.00101153	1956/2475	2
	GO:0032233	positive regulation of actin filament bundle assembly	2018-01-03	55/17381	0.00946366	0.0294101	0.00429121	54361	1			hsa04012	ErbB signaling pathway	2018-02-03	86/7322	0.000405979	0.00402684	0.00101153	1956/2475	2
	GO:0042130	negative regulation of T cell proliferation	2018-01-03	55/17381	0.00946366	0.0294101	0.00429121	3135	1			hsa04912	GnRH signaling pathway	2018-02-03	92/7322	0.000464703	0.00402684	0.00101153	1956/1432	2
	GO:2000243	positive regulation of reproductive process	2018-01-03	55/17381	0.00946366	0.0294101	0.00429121	54361	1			hsa05215	Prostate cancer	2018-02-03	97/7322	0.000516643	0.00402684	0.00101153	1956/2475	2
	GO:1903391	regulation of adherens junction organization	2018-01-03	57/17381	0.00980666	0.0302434	0.0044128	54361	1			hsa05231	Choline metabolism in cancer	2018-02-03	99/7322	0.000538181	0.00402684	0.00101153	1956/2475	2
	GO:0001658	branching involved in ureteric bud morphogenesis	2018-01-03	59/17381	0.0101496	0.0306595	0.00447351	54361	1			hsa04066	HIF-1 signaling pathway	2018-02-03	100/7322	0.000549114	0.00402684	0.00101153	1956/2475	2
	GO:0035773	insulin secretion involved in cellular response to glucose stimulus	2018-01-03	59/17381	0.0101496	0.0306595	0.00447351	3170	1			hsa04659	Th17 cell differentiation	2018-02-03	107/7322	0.000628692	0.00425576	0.00106903	1432/2475	2
	GO:0006968	cellular defense response	2018-01-03	60/17381	0.010321	0.0306595	0.00447351	3135	1			hsa04926	Relaxin signaling pathway	2018-02-03	130/7322	0.000927602	0.00525965	0.0013212	1956/1432	2
	GO:0045669	positive regulation of osteoblast differentiation	2018-01-03	60/17381	0.010321	0.0306595	0.00447351	54361	1			hsa05160	Hepatitis C	2018-02-03	131/7322	0.000941897	0.00525965	0.0013212	1956/1432	2
	GO:0060135	maternal process involved in female pregnancy	2018-01-03	60/17381	0.010321	0.0306595	0.00447351	54361	1			hsa04068	FoxO signaling pathway	2018-02-03	132/7322	0.000956299	0.00525965	0.0013212	1956/1432	2
	GO:0051785	positive regulation of nuclear division	2018-01-03	61/17381	0.0104924	0.0309412	0.00451461	54361	1			hsa04072	Phospholipase D signaling pathway	2018-02-03	146/7322	0.00116925	0.00594527	0.00149343	1956/2475	2
	GO:0046889	positive regulation of lipid biosynthetic process	2018-01-03	64/17381	0.0110066	0.0317618	0.00463434	54361	1			hsa05224	Breast cancer	2018-02-03	151/7322	0.00125042	0.00594527	0.00149343	1956/2475	2
	GO:0051145	smooth muscle cell differentiation	2018-01-03	64/17381	0.0110066	0.0317618	0.00463434	54361	1			hsa05226	Gastric cancer	2018-02-03	153/7322	0.00128364	0.00594527	0.00149343	1956/2475	2
	GO:0060675	ureteric bud morphogenesis	2018-01-03	64/17381	0.0110066	0.0317618	0.00463434	54361	1			hsa04218	Cellular senescence	2018-02-03	160/7322	0.00140328	0.00602768	0.00151413	1432/2475	2
	GO:0072171	mesonephric tubule morphogenesis	2018-01-03	65/17381	0.0111779	0.0320274	0.0046731	54361	1			hsa04630	Jak-STAT signaling pathway	2018-02-03	162/7322	0.00143842	0.00602768	0.00151413	1956/2475	2
	GO:0061180	mammary gland epithelium development	2018-01-03	66/17381	0.0113492	0.0322893	0.00471131	54361	1			hsa05225	Hepatocellular carcinoma	2018-02-03	168/7322	0.00154643	0.00618573	0.00155383	1956/2475	2
	GO:0030500	regulation of bone mineralization	2018-01-03	67/17381	0.0115205	0.0323214	0.00471599	54361	1			hsa05167	Kaposi's sarcoma-associated herpesvirus infection	2018-02-03	186/7322	0.0018935	0.00724471	0.00181984	1432/2475	2
	GO:0042446	hormone biosynthetic process	2018-01-03	67/17381	0.0115205	0.0323214	0.00471599	54361	1			hsa04015	Rap1 signaling pathway	2018-02-03	210/7322	0.0024098	0.00883593	0.00221955	1956/1432	2
	GO:0033077	T cell differentiation in thymus	2018-01-03	68/17381	0.0116918	0.0325757	0.0047531	54361	1			hsa04010	MAPK signaling pathway	2018-02-03	294/7322	0.00469278	0.0164213	0.00412498	1956/1432	2
	GO:0032945	negative regulation of mononuclear cell proliferation	2018-01-03	69/17381	0.011863	0.0326031	0.0047571	3135	1			hsa05206	MicroRNAs in cancer	2018-02-03	299/7322	0.00485176	0.0164213	0.00412498	1956/2475	2
	GO:0050672	negative regulation of lymphocyte proliferation	2018-01-03	69/17381	0.011863	0.0326031	0.0047571	3135	1			hsa05165	Human papillomavirus infection	2018-02-03	319/7322	0.00551336	0.0179695	0.00451386	1956/2475	2
	GO:0061045	negative regulation of wound healing	2018-01-03	70/17381	0.0120343	0.0327967	0.00478535	54361	1			hsa04151	PI3K-Akt signaling pathway	2018-02-03	351/7322	0.00665684	0.0209215	0.0052554	1956/2475	2
	GO:0007045	cell-substrate adherens junction assembly	2018-01-03	73/17381	0.0125478	0.0327967	0.00478535	54361	1			hsa04136	Autophagy - other	2018-01-03	32/7322	0.0130557	0.0396174	0.00995174	2475	1
	GO:0048041	focal adhesion assembly	2018-01-03	73/17381	0.0125478	0.0327967	0.00478535	54361	1			hsa05219	Bladder cancer	2018-01-03	41/7322	0.0167071	0.0490074	0.0123105	1956	1
	GO:0070664	negative regulation of leukocyte proliferation	2018-01-03	73/17381	0.0125478	0.0327967	0.00478535	3135	1		Module 44	hsa04659	Th17 cell differentiation	2018-02-02	107/7322	0.000211587	0.00655921	0.00133634	3091/3716	2
	GO:0072078	nephron tubule morphogenesis	2018-01-03	73/17381	0.0125478	0.0327967	0.00478535	54361	1			hsa05167	Kaposi's sarcoma-associated herpesvirus infection	2018-02-02	186/7322	0.000641925	0.00994984	0.00202713	3091/3716	2
	GO:0045582	positive regulation of T cell differentiation	2018-01-03	74/17381	0.012719	0.0327967	0.00478535	3135	1		Module 46	hsa04350	TGF-beta signaling pathway	2018-02-03	84/7322	0.000387278	0.0155324	0.00638666	4089/6093	2
	GO:0002479	antigen processing and presentation of exogenous peptide antigen via MHC class I, TAP-dependent	2018-01-03	75/17381	0.0128901	0.0327967	0.00478535	3135	1			hsa04270	Vascular smooth muscle contraction	2018-02-03	121/7322	0.000803813	0.0155324	0.00638666	6093/3708	2
	GO:0051492	regulation of stress fiber assembly	2018-01-03	75/17381	0.0128901	0.0327967	0.00478535	54361	1			hsa04611	Platelet activation	2018-02-03	123/7322	0.000830565	0.0155324	0.00638666	6093/3708	2
	GO:0072088	nephron epithelium morphogenesis	2018-01-03	75/17381	0.0128901	0.0327967	0.00478535	54361	1			hsa04371	Apelin signaling pathway	2018-02-03	137/7322	0.00102993	0.0155324	0.00638666	4089/3708	2
	GO:0006081	cellular aldehyde metabolic process	2018-01-03	76/17381	0.0130612	0.0327967	0.00478535	54361	1			hsa04921	Oxytocin signaling pathway	2018-02-03	153/7322	0.00128364	0.0155324	0.00638666	6093/3708	2
	GO:0070167	regulation of biomineral tissue development	2018-01-03	76/17381	0.0130612	0.0327967	0.00478535	54361	1			hsa04022	cGMP-PKG signaling pathway	2018-02-03	163/7322	0.00145616	0.0155324	0.00638666	6093/3708	2
	GO:0008344	adult locomotory behavior	2018-01-03	77/17381	0.0132323	0.0327967	0.00478535	3170	1			hsa05205	Proteoglycans in cancer	2018-02-03	203/7322	0.00225291	0.0205981	0.0084696	6093/3708	2
	GO:0021536	diencephalon development	2018-01-03	77/17381	0.0132323	0.0327967	0.00478535	54361	1		Module 47	hsa01522	Endocrine resistance	2018-02-04	96/7322	0.00100342	0.0234014	0.0126029	596/8202	2
	GO:0031016	pancreas development	2018-01-03	77/17381	0.0132323	0.0327967	0.00478535	3170	1			hsa04066	HIF-1 signaling pathway	2018-02-04	100/7322	0.00108844	0.0234014	0.0126029	596/3099	2
	GO:0061333	renal tubule morphogenesis	2018-01-03	77/17381	0.0132323	0.0327967	0.00478535	54361	1			hsa04210	Apoptosis	2018-02-04	138/7322	0.00206411	0.0295856	0.0159335	4170/596	2
	GO:0072028	nephron morphogenesis	2018-01-03	77/17381	0.0132323	0.0327967	0.00478535	54361	1			hsa04630	Jak-STAT signaling pathway	2018-02-04	162/7322	0.002835	0.0304763	0.0164132	4170/596	2
	GO:0042590	antigen processing and presentation of exogenous peptide antigen via MHC class I	2018-01-03	78/17381	0.0134034	0.0330182	0.00481766	3135	1		Module 49	hsa04975	Fat digestion and absorption	2018-01-02	41/7322	0.0111685	0.0340294	0.00358204	19	1
	GO:0045833	negative regulation of lipid metabolic process	2018-01-03	80/17381	0.0137455	0.0330199	0.00481791	54361	1			hsa02010	ABC transporters	2018-01-02	45/7322	0.0122548	0.0340294	0.00358204	19	1
	GO:1903035	negative regulation of response to wounding	2018-01-03	81/17381	0.0139165	0.0330199	0.00481791	54361	1			hsa04961	Endocrine and other factor-regulated calcium reabsorption	2018-01-02	47/7322	0.0127977	0.0340294	0.00358204	2099	1
	GO:0050810	regulation of steroid biosynthetic process	2018-01-03	82/17381	0.0140875	0.0330199	0.00481791	54361	1			hsa04979	Cholesterol metabolism	2018-01-02	50/7322	0.0136118	0.0340294	0.00358204	19	1
	GO:1901888	regulation of cell junction assembly	2018-01-03	82/17381	0.0140875	0.0330199	0.00481791	54361	1			hsa04917	Prolactin signaling pathway	2018-01-02	70/7322	0.0190304	0.0379876	0.00399869	2099	1
	GO:0001708	cell fate specification	2018-01-03	83/17381	0.0142585	0.0330199	0.00481791	3170	1			hsa01522	Endocrine resistance	2018-01-02	96/7322	0.0260522	0.0379876	0.00399869	2099	1
	GO:0034333	adherens junction assembly	2018-01-03	83/17381	0.0142585	0.0330199	0.00481791	54361	1			hsa04915	Estrogen signaling pathway	2018-01-02	98/7322	0.0265913	0.0379876	0.00399869	2099	1
	GO:0048477	oogenesis	2018-01-03	83/17381	0.0142585	0.0330199	0.00481791	54361	1			hsa04919	Thyroid hormone signaling pathway	2018-01-02	116/7322	0.0314365	0.0392956	0.00413638	2099	1
	GO:0010717	regulation of epithelial to mesenchymal transition	2018-01-03	85/17381	0.0146004	0.0330199	0.00481791	3170	1			hsa05224	Breast cancer	2018-01-02	151/7322	0.040823	0.0453589	0.00477462	2099	1
	GO:0030193	regulation of blood coagulation	2018-01-03	85/17381	0.0146004	0.0330199	0.00481791	3170	1		Module 51	hsa05323	Rheumatoid arthritis	2018-02-03	90/7322	0.000444692	0.0160089	0.00748954	6387/1435	2
	GO:0045621	positive regulation of lymphocyte differentiation	2018-01-03	85/17381	0.0146004	0.0330199	0.00481791	3135	1		Module 54	hsa04350	TGF-beta signaling pathway	2018-02-04	84/7322	0.000768777	0.00384388	0.00242772	10637/7044	2
	GO:0045778	positive regulation of ossification	2018-01-03	85/17381	0.0146004	0.0330199	0.00481791	54361	1			hsa04392	Hippo signaling pathway - multiple species	2018-01-04	29/7322	0.015752	0.03938	0.0248716	26524	1
	GO:0061053	somite development	2018-01-03	85/17381	0.0146004	0.0330199	0.00481791	54361	1		Module 55	hsa04330	Notch signaling pathway	2018-01-02	48/7322	0.0130691	0.0459259	0.00537145	182	1
	GO:0110020	regulation of actomyosin structure organization	2018-01-03	85/17381	0.0146004	0.0330199	0.00481791	54361	1			hsa05412	Arrhythmogenic right ventricular cardiomyopathy (ARVC)	2018-01-02	72/7322	0.0195714	0.0459259	0.00537145	1000	1
	GO:1900046	regulation of hemostasis	2018-01-03	85/17381	0.0146004	0.0330199	0.00481791	3170	1			hsa04658	Th1 and Th2 cell differentiation	2018-01-02	92/7322	0.0249736	0.0459259	0.00537145	182	1
	GO:0030038	contractile actin filament bundle assembly	2018-01-03	86/17381	0.0147713	0.0330199	0.00481791	54361	1			hsa01522	Endocrine resistance	2018-01-02	96/7322	0.0260522	0.0459259	0.00537145	182	1
	GO:0043149	stress fiber assembly	2018-01-03	86/17381	0.0147713	0.0330199	0.00481791	54361	1			hsa04668	TNF signaling pathway	2018-01-02	108/7322	0.0292846	0.0459259	0.00537145	182	1
	GO:0001656	metanephros development	2018-01-03	87/17381	0.0149422	0.0330199	0.00481791	54361	1			hsa04371	Apelin signaling pathway	2018-01-02	137/7322	0.0370739	0.0459259	0.00537145	182	1
	GO:0032231	regulation of actin filament bundle assembly	2018-01-03	87/17381	0.0149422	0.0330199	0.00481791	54361	1			hsa04514	Cell adhesion molecules (CAMs)	2018-01-02	145/7322	0.0392171	0.0459259	0.00537145	1000	1
	GO:0060337	type I interferon signaling pathway	2018-01-03	88/17381	0.0151131	0.0330199	0.00481791	3135	1			hsa05224	Breast cancer	2018-01-02	151/7322	0.040823	0.0459259	0.00537145	182	1
	GO:0071357	cellular response to type I interferon	2018-01-03	88/17381	0.0151131	0.0330199	0.00481791	3135	1
	GO:0007044	cell-substrate junction assembly	2018-01-03	89/17381	0.015284	0.0330199	0.00481791	54361	1
	GO:0009798	axis specification	2018-01-03	89/17381	0.015284	0.0330199	0.00481791	3170	1
	GO:0060333	interferon-gamma-mediated signaling pathway	2018-01-03	89/17381	0.015284	0.0330199	0.00481791	3135	1
	GO:0050818	regulation of coagulation	2018-01-03	91/17381	0.0156256	0.0334008	0.00487348	3170	1
	GO:1902106	negative regulation of leukocyte differentiation	2018-01-03	91/17381	0.0156256	0.0334008	0.00487348	3135	1
	GO:0060993	kidney morphogenesis	2018-01-03	92/17381	0.0157964	0.0334123	0.00487517	54361	1
	GO:0072080	nephron tubule development	2018-01-03	92/17381	0.0157964	0.0334123	0.00487517	54361	1
	GO:0034340	response to type I interferon	2018-01-03	93/17381	0.0159672	0.0335976	0.00490221	3135	1
	GO:0002474	antigen processing and presentation of peptide antigen via MHC class I	2018-01-03	94/17381	0.0161379	0.0336069	0.00490355	3135	1
	GO:0061326	renal tubule development	2018-01-03	94/17381	0.0161379	0.0336069	0.00490355	54361	1
	GO:0001657	ureteric bud development	2018-01-03	97/17381	0.0166501	0.0341487	0.00498262	54361	1
	GO:0008585	female gonad development	2018-01-03	97/17381	0.0166501	0.0341487	0.00498262	54361	1
	GO:0010906	regulation of glucose metabolic process	2018-01-03	98/17381	0.0168208	0.0341487	0.00498262	3170	1
	GO:0072163	mesonephric epithelium development	2018-01-03	98/17381	0.0168208	0.0341487	0.00498262	54361	1
	GO:0072164	mesonephric tubule development	2018-01-03	98/17381	0.0168208	0.0341487	0.00498262	54361	1
	GO:0030282	bone mineralization	2018-01-03	99/17381	0.0169915	0.0343227	0.00500801	54361	1
	GO:0050868	negative regulation of T cell activation	2018-01-03	101/17381	0.0173327	0.0348342	0.00508263	3135	1
	GO:0001823	mesonephros development	2018-01-03	102/17381	0.0175033	0.0348342	0.00508263	54361	1
	GO:0046545	development of primary female sexual characteristics	2018-01-03	102/17381	0.0175033	0.0348342	0.00508263	54361	1
	GO:0001952	regulation of cell-matrix adhesion	2018-01-03	103/17381	0.0176739	0.0350013	0.00510701	54361	1
	GO:0002065	columnar/cuboidal epithelial cell differentiation	2018-01-03	106/17381	0.0181855	0.0358388	0.00522921	54361	1
	GO:0010811	positive regulation of cell-substrate adhesion	2018-01-03	107/17381	0.018356	0.0359992	0.00525262	54361	1
	GO:0019218	regulation of steroid metabolic process	2018-01-03	108/17381	0.0185265	0.036158	0.00527579	54361	1
	GO:0072009	nephron epithelium development	2018-01-03	109/17381	0.018697	0.0363153	0.00529874	54361	1
	GO:0008543	fibroblast growth factor receptor signaling pathway	2018-01-03	112/17381	0.0192083	0.0367779	0.00536624	54361	1
	GO:1903038	negative regulation of leukocyte cell-cell adhesion	2018-01-03	112/17381	0.0192083	0.0367779	0.00536624	3135	1
	GO:2000181	negative regulation of blood vessel morphogenesis	2018-01-03	112/17381	0.0192083	0.0367779	0.00536624	54361	1
	GO:0045667	regulation of osteoblast differentiation	2018-01-03	113/17381	0.0193786	0.0369291	0.0053883	54361	1
	GO:0034754	cellular hormone metabolic process	2018-01-03	116/17381	0.0198897	0.037725	0.00550443	54361	1
	GO:0046660	female sex differentiation	2018-01-03	117/17381	0.02006	0.0378702	0.00552562	54361	1
	GO:0022612	gland morphogenesis	2018-01-03	119/17381	0.0204005	0.038334	0.00559329	54361	1
	GO:0071333	cellular response to glucose stimulus	2018-01-03	120/17381	0.0205708	0.0383643	0.00559772	3170	1
	GO:1901343	negative regulation of vasculature development	2018-01-03	121/17381	0.020741	0.0383643	0.00559772	54361	1
	GO:0001838	embryonic epithelial tube formation	2018-01-03	122/17381	0.0209112	0.0383643	0.00559772	54361	1
	GO:0010675	regulation of cellular carbohydrate metabolic process	2018-01-03	123/17381	0.0210814	0.0383643	0.00559772	3170	1
	GO:0034332	adherens junction organization	2018-01-03	123/17381	0.0210814	0.0383643	0.00559772	54361	1
	GO:0045834	positive regulation of lipid metabolic process	2018-01-03	123/17381	0.0210814	0.0383643	0.00559772	54361	1
	GO:0071331	cellular response to hexose stimulus	2018-01-03	123/17381	0.0210814	0.0383643	0.00559772	3170	1
	GO:0071326	cellular response to monosaccharide stimulus	2018-01-03	124/17381	0.0212516	0.0385006	0.0056176	3170	1
	GO:0032963	collagen metabolic process	2018-01-03	125/17381	0.0214217	0.0386356	0.00563729	54361	1
	GO:0090263	positive regulation of canonical Wnt signaling pathway	2018-01-03	126/17381	0.0215918	0.0387694	0.00565681	54361	1
	GO:0007292	female gamete generation	2018-01-03	129/17381	0.0221021	0.0388355	0.00566646	54361	1
	GO:0045580	regulation of T cell differentiation	2018-01-03	129/17381	0.0221021	0.0388355	0.00566646	3135	1
	GO:0044259	multicellular organismal macromolecule metabolic process	2018-01-03	130/17381	0.0222722	0.0388355	0.00566646	54361	1
	GO:0072175	epithelial tube formation	2018-01-03	130/17381	0.0222722	0.0388355	0.00566646	54361	1
	GO:0030879	mammary gland development	2018-01-03	131/17381	0.0224422	0.0388355	0.00566646	54361	1
	GO:0031214	biomineral tissue development	2018-01-03	131/17381	0.0224422	0.0388355	0.00566646	54361	1
	GO:0071322	cellular response to carbohydrate stimulus	2018-01-03	131/17381	0.0224422	0.0388355	0.00566646	3170	1
	GO:0050777	negative regulation of immune response	2018-01-03	132/17381	0.0226122	0.0388355	0.00566646	3135	1
	GO:0051017	actin filament bundle assembly	2018-01-03	132/17381	0.0226122	0.0388355	0.00566646	54361	1
	GO:0001889	liver development	2018-01-03	133/17381	0.0227822	0.0388355	0.00566646	54361	1
	GO:0051250	negative regulation of lymphocyte activation	2018-01-03	133/17381	0.0227822	0.0388355	0.00566646	3135	1
	GO:1902107	positive regulation of leukocyte differentiation	2018-01-03	133/17381	0.0227822	0.0388355	0.00566646	3135	1
	GO:0001678	cellular glucose homeostasis	2018-01-03	136/17381	0.023292	0.0388571	0.00566961	3170	1
	GO:0009267	cellular response to starvation	2018-01-03	136/17381	0.023292	0.0388571	0.00566961	54361	1
	GO:0061008	hepaticobiliary system development	2018-01-03	136/17381	0.023292	0.0388571	0.00566961	54361	1
	GO:0061572	actin filament bundle organization	2018-01-03	136/17381	0.023292	0.0388571	0.00566961	54361	1
	GO:0072006	nephron development	2018-01-03	138/17381	0.0236318	0.0388571	0.00566961	54361	1
	GO:2000241	regulation of reproductive process	2018-01-03	138/17381	0.0236318	0.0388571	0.00566961	54361	1
	GO:0008584	male gonad development	2018-01-03	139/17381	0.0238017	0.0388571	0.00566961	54361	1
	GO:0072073	kidney epithelium development	2018-01-03	139/17381	0.0238017	0.0388571	0.00566961	54361	1
	GO:0090288	negative regulation of cellular response to growth factor stimulus	2018-01-03	139/17381	0.0238017	0.0388571	0.00566961	54361	1
	GO:0030534	adult behavior	2018-01-03	140/17381	0.0239716	0.0388571	0.00566961	3170	1
	GO:0046546	development of primary male sexual characteristics	2018-01-03	140/17381	0.0239716	0.0388571	0.00566961	54361	1
	GO:0043433	negative regulation of DNA binding transcription factor activity	2018-01-03	141/17381	0.0241414	0.0388571	0.00566961	3170	1
	GO:0044344	cellular response to fibroblast growth factor stimulus	2018-01-03	141/17381	0.0241414	0.0388571	0.00566961	54361	1
	GO:1903707	negative regulation of hemopoiesis	2018-01-03	141/17381	0.0241414	0.0388571	0.00566961	3135	1
	GO:0035148	tube formation	2018-01-03	144/17381	0.0246508	0.0393633	0.00574347	54361	1
	GO:0071346	cellular response to interferon-gamma	2018-01-03	144/17381	0.0246508	0.0393633	0.00574347	3135	1
	GO:0016331	morphogenesis of embryonic epithelium	2018-01-03	148/17381	0.0253297	0.0399734	0.00583249	54361	1
	GO:0048754	branching morphogenesis of an epithelial tube	2018-01-03	148/17381	0.0253297	0.0399734	0.00583249	54361	1
	GO:0071774	response to fibroblast growth factor	2018-01-03	148/17381	0.0253297	0.0399734	0.00583249	54361	1
	GO:0035567	non-canonical Wnt signaling pathway	2018-01-03	151/17381	0.0258386	0.0404605	0.00590357	54361	1
	GO:0044236	multicellular organism metabolic process	2018-01-03	151/17381	0.0258386	0.0404605	0.00590357	54361	1
	GO:0002695	negative regulation of leukocyte activation	2018-01-03	155/17381	0.026517	0.0412033	0.00601195	3135	1
	GO:0042129	regulation of T cell proliferation	2018-01-03	155/17381	0.026517	0.0412033	0.00601195	3135	1
	GO:0045619	regulation of lymphocyte differentiation	2018-01-03	156/17381	0.0266865	0.0413079	0.00602721	3135	1
	GO:0022408	negative regulation of cell-cell adhesion	2018-01-03	157/17381	0.026856	0.0414116	0.00604234	3135	1
	GO:0030177	positive regulation of Wnt signaling pathway	2018-01-03	160/17381	0.0273645	0.0420352	0.00613332	54361	1
	GO:0046661	male sex differentiation	2018-01-03	162/17381	0.0277033	0.0423945	0.00618575	54361	1
	GO:0034341	response to interferon-gamma	2018-01-03	165/17381	0.0282115	0.0430092	0.00627544	3135	1
	GO:0010565	regulation of cellular ketone metabolic process	2018-01-03	166/17381	0.0283808	0.0431047	0.00628938	54361	1
	GO:0046890	regulation of lipid biosynthetic process	2018-01-03	167/17381	0.0285501	0.0431995	0.0063032	54361	1
	GO:0090090	negative regulation of canonical Wnt signaling pathway	2018-01-03	168/17381	0.0287194	0.0432935	0.00631692	54361	1
	GO:1903708	positive regulation of hemopoiesis	2018-01-03	169/17381	0.0288887	0.0433868	0.00633054	3135	1
	GO:0140013	meiotic nuclear division	2018-01-03	171/17381	0.0292272	0.0436624	0.00637075	54361	1
	GO:0042594	response to starvation	2018-01-03	172/17381	0.0293964	0.0436624	0.00637075	54361	1
	GO:0050796	regulation of insulin secretion	2018-01-03	172/17381	0.0293964	0.0436624	0.00637075	3170	1
	GO:0007584	response to nutrient	2018-01-03	173/17381	0.0295657	0.0436832	0.00637378	3170	1
	GO:0002478	antigen processing and presentation of exogenous peptide antigen	2018-01-03	174/17381	0.0297348	0.0436832	0.00637378	3135	1
	GO:0050866	negative regulation of cell activation	2018-01-03	174/17381	0.0297348	0.0436832	0.00637378	3135	1
	GO:0006109	regulation of carbohydrate metabolic process	2018-01-03	176/17381	0.0300731	0.0438612	0.00639976	3170	1
	GO:0031032	actomyosin structure organization	2018-01-03	176/17381	0.0300731	0.0438612	0.00639976	54361	1
	GO:0061138	morphogenesis of a branching epithelium	2018-01-03	180/17381	0.0307495	0.0442947	0.00646301	54361	1
	GO:1905330	regulation of morphogenesis of an epithelium	2018-01-03	180/17381	0.0307495	0.0442947	0.00646301	54361	1
	GO:0009749	response to glucose	2018-01-03	181/17381	0.0309186	0.0442947	0.00646301	3170	1
	GO:0019884	antigen processing and presentation of exogenous antigen	2018-01-03	181/17381	0.0309186	0.0442947	0.00646301	3135	1
	GO:0051783	regulation of nuclear division	2018-01-03	181/17381	0.0309186	0.0442947	0.00646301	54361	1
	GO:1902905	positive regulation of supramolecular fiber organization	2018-01-03	182/17381	0.0310876	0.0443795	0.00647538	54361	1
	GO:1903046	meiotic cell cycle process	2018-01-03	183/17381	0.0312566	0.0443914	0.00647712	54361	1
	GO:0006694	steroid biosynthetic process	2018-01-03	184/17381	0.0314256	0.0443914	0.00647712	54361	1
	GO:0030278	regulation of ossification	2018-01-03	184/17381	0.0314256	0.0443914	0.00647712	54361	1
	GO:0009746	response to hexose	2018-01-03	186/17381	0.0317635	0.0446391	0.00651326	3170	1
	GO:0007369	gastrulation	2018-01-03	187/17381	0.0319324	0.0446391	0.00651326	3170	1
	GO:0048002	antigen processing and presentation of peptide antigen	2018-01-03	187/17381	0.0319324	0.0446391	0.00651326	3135	1
	GO:0010810	regulation of cell-substrate adhesion	2018-01-03	189/17381	0.0322702	0.0448875	0.00654951	54361	1
	GO:0007565	female pregnancy	2018-01-03	190/17381	0.0324391	0.0448875	0.00654951	54361	1
	GO:0034284	response to monosaccharide	2018-01-03	191/17381	0.0326079	0.0448875	0.00654951	3170	1
	GO:0006006	glucose metabolic process	2018-01-03	192/17381	0.0327768	0.0448875	0.00654951	3170	1
	GO:0007626	locomotory behavior	2018-01-03	192/17381	0.0327768	0.0448875	0.00654951	3170	1
	GO:0042445	hormone metabolic process	2018-01-03	192/17381	0.0327768	0.0448875	0.00654951	54361	1
	GO:0001763	morphogenesis of a branching structure	2018-01-03	193/17381	0.0329456	0.0449663	0.006561	54361	1
	GO:0030178	negative regulation of Wnt signaling pathway	2018-01-03	200/17381	0.0341267	0.0464215	0.00677333	54361	1
	GO:0090276	regulation of peptide hormone secretion	2018-01-03	201/17381	0.0342953	0.0464944	0.00678396	3170	1
	GO:0009952	anterior/posterior pattern specification	2018-01-03	202/17381	0.034464	0.0465667	0.00679452	3170	1
	GO:0030073	insulin secretion	2018-01-03	203/17381	0.0346326	0.0466143	0.00680146	3170	1
	GO:0034329	cell junction assembly	2018-01-03	204/17381	0.0348012	0.0466143	0.00680146	54361	1
	GO:0051495	positive regulation of cytoskeleton organization	2018-01-03	205/17381	0.0349698	0.0466143	0.00680146	54361	1
	GO:0007160	cell-matrix adhesion	2018-01-03	206/17381	0.0351383	0.0466143	0.00680146	54361	1
	GO:0050670	regulation of lymphocyte proliferation	2018-01-03	206/17381	0.0351383	0.0466143	0.00680146	3135	1
	GO:0001649	osteoblast differentiation	2018-01-03	207/17381	0.0353069	0.0466143	0.00680146	54361	1
	GO:0032944	regulation of mononuclear cell proliferation	2018-01-03	207/17381	0.0353069	0.0466143	0.00680146	3135	1
	GO:2001234	negative regulation of apoptotic signaling pathway	2018-01-03	211/17381	0.0359808	0.0473493	0.00690871	54361	1
	GO:0009743	response to carbohydrate	2018-01-03	212/17381	0.0361492	0.0474165	0.00691851	3170	1
	GO:0050870	positive regulation of T cell activation	2018-01-03	215/17381	0.0366544	0.0479236	0.0069925	3135	1
	GO:0070663	regulation of leukocyte proliferation	2018-01-03	217/17381	0.0369911	0.0481802	0.00702994	3135	1
	GO:0008406	gonad development	2018-01-03	218/17381	0.0371594	0.0481802	0.00702994	54361	1
	GO:0033500	carbohydrate homeostasis	2018-01-03	219/17381	0.0373277	0.0481802	0.00702994	3170	1
	GO:0042593	glucose homeostasis	2018-01-03	219/17381	0.0373277	0.0481802	0.00702994	3170	1
	GO:0044706	multi-multicellular organism process	2018-01-03	220/17381	0.037496	0.0482433	0.00703915	54361	1
	GO:0071560	cellular response to transforming growth factor beta stimulus	2018-01-03	221/17381	0.0376643	0.0483059	0.00704829	54361	1
	GO:0019882	antigen processing and presentation	2018-01-03	223/17381	0.0380007	0.0485523	0.00708424	3135	1
	GO:0045137	development of primary sexual characteristics	2018-01-03	224/17381	0.0381689	0.0485523	0.00708424	54361	1
	GO:0071559	response to transforming growth factor beta	2018-01-03	225/17381	0.0383371	0.0485523	0.00708424	54361	1
	GO:0072659	protein localization to plasma membrane	2018-01-03	225/17381	0.0383371	0.0485523	0.00708424	54361	1
	GO:1903039	positive regulation of leukocyte cell-cell adhesion	2018-01-03	226/17381	0.0385053	0.0486129	0.00709308	3135	1
	GO:1901617	organic hydroxy compound biosynthetic process	2018-01-03	227/17381	0.0386734	0.0486731	0.00710186	54361	1
	GO:0042180	cellular ketone metabolic process	2018-01-03	231/17381	0.0393458	0.0493655	0.00720289	54361	1
	GO:0019318	hexose metabolic process	2018-01-03	233/17381	0.0396819	0.0494799	0.00721957	3170	1
	GO:0045216	cell-cell junction organization	2018-01-03	233/17381	0.0396819	0.0494799	0.00721957	54361	1
	GO:0110053	regulation of actin filament organization	2018-01-03	234/17381	0.0398499	0.0495365	0.00722783	54361	1
Module 3	GO:0010810	regulation of cell-substrate adhesion	2018-06-21	189/17381	7.23407e-08	8.78216e-05	5.52835e-05	2335/780/285/3675/10395/4763	6
	GO:0031589	cell-substrate adhesion	2018-06-21	316/17381	1.48466e-06	0.000901189	0.000567297	2335/780/285/3675/10395/4763	6
	GO:0007565	female pregnancy	2018-05-21	190/17381	2.61407e-06	0.00105783	0.000665901	780/285/3675/7076/3077	5
	GO:0007160	cell-matrix adhesion	2018-05-21	206/17381	3.88442e-06	0.00108352	0.000682077	2335/780/3675/10395/4763	5
	GO:0090092	regulation of transmembrane receptor protein serine/threonine kinase signaling pathway	2018-05-21	216/17381	4.89663e-06	0.00108352	0.000682077	3309/2626/3675/57154/3077	5
	GO:0044706	multi-multicellular organism process	2018-05-21	220/17381	5.35515e-06	0.00108352	0.000682077	780/285/3675/7076/3077	5
	GO:0046580	negative regulation of Ras protein signal transduction	2018-03-21	46/17381	2.23159e-05	0.00350512	0.00220647	3675/10395/4763	3
	GO:0051058	negative regulation of small GTPase mediated signal transduction	2018-03-21	52/17381	3.23378e-05	0.00350512	0.00220647	3675/10395/4763	3
	GO:0030509	BMP signaling pathway	2018-04-21	155/17381	3.2352e-05	0.00350512	0.00220647	2626/3675/57154/3077	4
	GO:0007178	transmembrane receptor protein serine/threonine kinase signaling pathway	2018-05-21	322/17381	3.373e-05	0.00350512	0.00220647	3309/2626/3675/57154/3077	5
	GO:0030198	extracellular matrix organization	2018-05-21	335/17381	4.07491e-05	0.00350512	0.00220647	2335/780/3675/7076/4763	5
	GO:0043062	extracellular structure organization	2018-05-21	336/17381	4.13326e-05	0.00350512	0.00220647	2335/780/3675/7076/4763	5
	GO:0010812	negative regulation of cell-substrate adhesion	2018-03-21	57/17381	4.26486e-05	0.00350512	0.00220647	285/10395/4763	3
	GO:0071772	response to BMP	2018-04-21	167/17381	4.33088e-05	0.00350512	0.00220647	2626/3675/57154/3077	4
	GO:0071773	cellular response to BMP stimulus	2018-04-21	167/17381	4.33088e-05	0.00350512	0.00220647	2626/3675/57154/3077	4
	GO:0001667	ameboidal-type cell migration	2018-05-21	353/17381	5.22853e-05	0.00396715	0.00249731	285/6776/3675/7076/4763	5
	GO:0048588	developmental cell growth	2018-04-21	202/17381	9.07657e-05	0.00623979	0.00392793	2335/2626/780/57154	4
	GO:0010632	regulation of epithelial cell migration	2018-04-21	203/17381	9.25175e-05	0.00623979	0.00392793	285/6776/3675/4763	4
	GO:0043535	regulation of blood vessel endothelial cell migration	2018-03-21	76/17381	0.000100966	0.00645121	0.00406102	285/6776/4763	3
	GO:0031667	response to nutrient levels	2018-05-21	426/17381	0.000127085	0.00742551	0.00467434	3309/3939/2626/3077/1978	5
	GO:0071560	cellular response to transforming growth factor beta stimulus	2018-04-21	221/17381	0.000128448	0.00742551	0.00467434	3309/3675/55553/57154	4
	GO:0071559	response to transforming growth factor beta	2018-04-21	225/17381	0.000137637	0.00743534	0.00468053	3309/3675/55553/57154	4
	GO:0048709	oligodendrocyte differentiation	2018-03-21	85/17381	0.000140867	0.00743534	0.00468053	10810/55553/4763	3
	GO:0030510	regulation of BMP signaling pathway	2018-03-21	87/17381	0.000150937	0.00752102	0.00473447	2626/3675/57154	3
	GO:0009991	response to extracellular stimulus	2018-05-21	457/17381	0.000176551	0.00752102	0.00473447	3309/3939/2626/3077/1978	5
	GO:0022617	extracellular matrix disassembly	2018-03-21	92/17381	0.000178133	0.00752102	0.00473447	2335/780/7076	3
	GO:2000738	positive regulation of stem cell differentiation	2018-02-21	17/17381	0.000187032	0.00752102	0.00473447	2626/55553	2
	GO:0010976	positive regulation of neuron projection development	2018-04-21	245/17381	0.000190898	0.00752102	0.00473447	3309/2335/3675/57154	4
	GO:0001525	angiogenesis	2018-05-21	469/17381	0.000199227	0.00752102	0.00473447	2335/2626/285/6772/4763	5
	GO:0007162	negative regulation of cell adhesion	2018-04-21	248/17381	0.000200009	0.00752102	0.00473447	285/10395/4763/3077	4
	GO:0051591	response to cAMP	2018-03-21	96/17381	0.000202044	0.00752102	0.00473447	3309/3939/6772	3
	GO:0043534	blood vessel endothelial cell migration	2018-03-21	97/17381	0.00020833	0.00752102	0.00473447	285/6776/4763	3
	GO:0051962	positive regulation of nervous system development	2018-05-21	476/17381	0.000213449	0.00752102	0.00473447	3309/2335/10810/3675/57154	5
	GO:0090287	regulation of cellular response to growth factor stimulus	2018-04-21	253/17381	0.000215888	0.00752102	0.00473447	3309/2626/3675/57154	4
	GO:0035024	negative regulation of Rho protein signal transduction	2018-02-21	19/17381	0.000234823	0.00752102	0.00473447	3675/10395	2
	GO:0030336	negative regulation of cell migration	2018-04-21	259/17381	0.000236124	0.00752102	0.00473447	285/10395/7076/4763	4
	GO:0010631	epithelial cell migration	2018-04-21	260/17381	0.000239625	0.00752102	0.00473447	285/6776/3675/4763	4
	GO:0001952	regulation of cell-matrix adhesion	2018-03-21	103/17381	0.000248726	0.00752102	0.00473447	780/10395/4763	3
	GO:0017015	regulation of transforming growth factor beta receptor signaling pathway	2018-03-21	103/17381	0.000248726	0.00752102	0.00473447	3309/3675/57154	3
	GO:0090132	epithelium migration	2018-04-21	263/17381	0.000250353	0.00752102	0.00473447	285/6776/3675/4763	4
	GO:0001822	kidney development	2018-04-21	264/17381	0.000254005	0.00752102	0.00473447	285/6772/3675/4763	4
	GO:1903844	regulation of cellular response to transforming growth factor beta stimulus	2018-03-21	105/17381	0.000263237	0.00760881	0.00478973	3309/3675/57154	3
	GO:0090130	tissue migration	2018-04-21	269/17381	0.000272844	0.00770308	0.00484907	285/6776/3675/4763	4
	GO:0045765	regulation of angiogenesis	2018-04-21	273/17381	0.000288625	0.0078956	0.00497026	2626/285/6772/4763	4
	GO:2000146	negative regulation of cell motility	2018-04-21	274/17381	0.000292671	0.0078956	0.00497026	285/10395/7076/4763	4
	GO:0016525	negative regulation of angiogenesis	2018-03-21	110/17381	0.000301887	0.00796718	0.00501532	285/6772/4763	3
	GO:0072001	renal system development	2018-04-21	280/17381	0.000317809	0.00805077	0.00506794	285/6772/3675/4763	4
	GO:2000181	negative regulation of blood vessel morphogenesis	2018-03-21	112/17381	0.000318317	0.00805077	0.00506794	285/6772/4763	3
	GO:0001936	regulation of endothelial cell proliferation	2018-03-21	113/17381	0.000326745	0.00809527	0.00509595	6776/6772/4763	3
	GO:0051271	negative regulation of cellular component movement	2018-04-21	290/17381	0.000363108	0.00881627	0.00554982	285/10395/7076/4763	4
	GO:1901343	negative regulation of vasculature development	2018-03-21	121/17381	0.000399397	0.00950721	0.00598477	285/6772/4763	3
	GO:0040013	negative regulation of locomotion	2018-04-21	303/17381	0.000428711	0.0100088	0.00630049	285/10395/7076/4763	4
	GO:1901342	regulation of vasculature development	2018-04-21	307/17381	0.0004505	0.010319	0.00649579	2626/285/6772/4763	4
	GO:0001935	endothelial cell proliferation	2018-03-21	130/17381	0.000492719	0.0109233	0.0068762	6776/6772/4763	3
	GO:0001655	urogenital system development	2018-04-21	316/17381	0.000502412	0.0109233	0.0068762	285/6772/3675/4763	4
	GO:0046683	response to organophosphorus	2018-03-21	131/17381	0.000503875	0.0109233	0.0068762	3309/3939/6772	3
	GO:0072006	nephron development	2018-03-21	138/17381	0.000586539	0.0124923	0.00786385	285/6772/3675	3
	GO:0045666	positive regulation of neuron differentiation	2018-04-21	331/17381	0.000598242	0.0125218	0.00788246	3309/2335/3675/57154	4
	GO:0008360	regulation of cell shape	2018-03-21	142/17381	0.000637449	0.0127392	0.00801932	2335/10810/10395	3
	GO:0031346	positive regulation of cell projection organization	2018-04-21	338/17381	0.00064715	0.0127392	0.00801932	3309/2335/3675/57154	4
	GO:0010594	regulation of endothelial cell migration	2018-03-21	143/17381	0.000650603	0.0127392	0.00801932	285/6776/4763	3
	GO:1990138	neuron projection extension	2018-03-21	143/17381	0.000650603	0.0127392	0.00801932	2335/780/57154	3
	GO:0001666	response to hypoxia	2018-04-21	341/17381	0.000668958	0.01285	0.00808905	3939/285/4763/1978	4
	GO:0014074	response to purine-containing compound	2018-03-21	145/17381	0.00067743	0.01285	0.00808905	3309/3939/6772	3
	GO:0035239	tube morphogenesis	2018-04-21	347/17381	0.000714139	0.0133379	0.00839619	2626/780/10395/3198	4
	GO:0036293	response to decreased oxygen levels	2018-04-21	349/17381	0.00072967	0.0134215	0.00844881	3939/285/4763/1978	4
	GO:0001953	negative regulation of cell-matrix adhesion	2018-02-21	34/17381	0.000762013	0.0138072	0.00869162	10395/4763	2
	GO:0014706	striated muscle tissue development	2018-04-21	369/17381	0.000898471	0.0160404	0.0100974	2626/6901/55553/4763	4
	GO:0070482	response to oxygen levels	2018-04-21	371/17381	0.000916746	0.0161294	0.0101534	3939/285/4763/1978	4
	GO:0001937	negative regulation of endothelial cell proliferation	2018-02-21	40/17381	0.00105487	0.0180367	0.0113541	6772/4763	2
	GO:0021575	hindbrain morphogenesis	2018-02-21	40/17381	0.00105487	0.0180367	0.0113541	3309/10395	2
	GO:0060537	muscle tissue development	2018-04-21	387/17381	0.00107256	0.0180845	0.0113842	2626/6901/55553/4763	4
	GO:0042594	response to starvation	2018-03-21	172/17381	0.00111088	0.0184742	0.0116294	3309/3077/1978	3
	GO:0007179	transforming growth factor beta receptor signaling pathway	2018-03-21	174/17381	0.00114854	0.0188205	0.0118475	3309/3675/57154	3
	GO:0007595	lactation	2018-02-21	42/17381	0.00116272	0.0188205	0.0118475	780/6776	2
	GO:0009749	response to glucose	2018-03-21	181/17381	0.00128667	0.0205528	0.0129379	3939/2626/285	3
	GO:0043434	response to peptide hormone	2018-04-21	410/17381	0.0013281	0.0207292	0.013049	6776/6772/7076/1978	4
	GO:0042493	response to drug	2018-04-21	411/17381	0.0013401	0.0207292	0.013049	3309/3939/2626/3675	4
	GO:0043542	endothelial cell migration	2018-03-21	184/17381	0.00134893	0.0207292	0.013049	285/6776/4763	3
	GO:0050769	positive regulation of neurogenesis	2018-04-21	414/17381	0.00137655	0.0208551	0.0131282	3309/2335/3675/57154	4
	GO:0009746	response to hexose	2018-03-21	186/17381	0.00139149	0.0208551	0.0131282	3939/2626/285	3
	GO:0010001	glial cell differentiation	2018-03-21	187/17381	0.00141308	0.0209204	0.0131694	10810/55553/4763	3
	GO:0048732	gland development	2018-04-21	422/17381	0.00147715	0.0214094	0.0134772	780/6776/4763/3077	4
	GO:0034284	response to monosaccharide	2018-03-21	191/17381	0.00150155	0.0214094	0.0134772	3939/2626/285	3
	GO:0010975	regulation of neuron projection development	2018-04-21	425/17381	0.00151617	0.0214094	0.0134772	3309/2335/3675/57154	4
	GO:0006953	acute-phase response	2018-02-21	48/17381	0.00151664	0.0214094	0.0134772	2335/3077	2
	GO:0022604	regulation of cell morphogenesis	2018-04-21	432/17381	0.00161003	0.0224664	0.0141425	2335/10810/10395/57154	4
	GO:0009314	response to radiation	2018-04-21	437/17381	0.00167951	0.0231697	0.0145853	3309/285/4763/3198	4
	GO:0030335	positive regulation of cell migration	2018-04-21	442/17381	0.00175108	0.0238855	0.0150358	3309/2335/6776/3675	4
	GO:0007566	embryo implantation	2018-02-21	52/17381	0.00177768	0.023979	0.0150947	780/7076	2
	GO:0007632	visual behavior	2018-02-21	53/17381	0.00184605	0.0246276	0.015503	4763/3198	2
	GO:0060560	developmental growth involved in morphogenesis	2018-03-21	207/17381	0.00189012	0.0249414	0.0157006	2335/780/57154	3
	GO:0031330	negative regulation of cellular catabolic process	2018-03-21	209/17381	0.0019427	0.0250897	0.0157939	2626/7076/3077	3
	GO:0046578	regulation of Ras protein signal transduction	2018-03-21	209/17381	0.0019427	0.0250897	0.0157939	3675/10395/4763	3
	GO:0034394	protein localization to cell surface	2018-02-21	55/17381	0.00198651	0.0253612	0.0159648	57154/3077	2
	GO:0009743	response to carbohydrate	2018-03-21	212/17381	0.00202326	0.0253612	0.0159648	3939/2626/285	3
	GO:2000147	positive regulation of cell motility	2018-04-21	460/17381	0.00202639	0.0253612	0.0159648	3309/2335/6776/3675	4
	GO:0048738	cardiac muscle tissue development	2018-03-21	215/17381	0.00210589	0.0260872	0.0164218	2626/6901/55553	3
	GO:1905207	regulation of cardiocyte differentiation	2018-02-21	58/17381	0.00220642	0.0270565	0.017032	2626/55553	2
	GO:0051272	positive regulation of cellular component movement	2018-04-21	473/17381	0.00224308	0.027231	0.0171419	3309/2335/6776/3675	4
	GO:1901652	response to peptide	2018-04-21	477/17381	0.00231287	0.0278003	0.0175002	6776/6772/7076/1978	4
	GO:0060135	maternal process involved in female pregnancy	2018-02-21	60/17381	0.00235916	0.0280787	0.0176755	285/3675	2
	GO:0016049	cell growth	2018-04-21	486/17381	0.0024754	0.0291761	0.0183663	2335/2626/780/57154	4
	GO:0010720	positive regulation of cell development	2018-04-21	488/17381	0.00251257	0.0293294	0.0184628	3309/2335/3675/57154	4
	GO:0040017	positive regulation of locomotion	2018-04-21	490/17381	0.00255012	0.0294842	0.0185602	3309/2335/6776/3675	4
	GO:0048708	astrocyte differentiation	2018-02-21	66/17381	0.00284654	0.0322963	0.0203304	55553/4763	2
	GO:0048844	artery morphogenesis	2018-02-21	66/17381	0.00284654	0.0322963	0.0203304	4763/3198	2
	GO:0030512	negative regulation of transforming growth factor beta receptor signaling pathway	2018-02-21	70/17381	0.00319554	0.0359203	0.0226117	3309/57154	2
	GO:0042063	gliogenesis	2018-03-21	254/17381	0.00337612	0.0372721	0.0234627	10810/55553/4763	3
	GO:1903845	negative regulation of cellular response to transforming growth factor beta stimulus	2018-02-21	72/17381	0.0033772	0.0372721	0.0234627	3309/57154	2
	GO:0009895	negative regulation of catabolic process	2018-03-21	260/17381	0.00360525	0.0394304	0.0248213	2626/7076/3077	3
	GO:0031396	regulation of protein ubiquitination	2018-03-21	265/17381	0.00380333	0.0412254	0.0259513	3309/57154/3077	3
	GO:0050890	cognition	2018-03-21	271/17381	0.0040497	0.0427563	0.026915	3675/4763/3198	3
	GO:0001938	positive regulation of endothelial cell proliferation	2018-02-21	79/17381	0.00405023	0.0427563	0.026915	6776/4763	2
	GO:0007492	endoderm development	2018-02-21	79/17381	0.00405023	0.0427563	0.026915	2335/2626	2
	GO:0031100	animal organ regeneration	2018-02-21	80/17381	0.00415106	0.043443	0.0273473	285/3077	2
	GO:0060840	artery development	2018-02-21	84/17381	0.00456602	0.0473774	0.029824	4763/3198	2
	GO:0001656	metanephros development	2018-02-21	87/17381	0.00488936	0.0498797	0.0313992	6772/4763	2
	GO:0021782	glial cell development	2018-02-21	87/17381	0.00488936	0.0498797	0.0313992	10810/4763	2
	GO:1903320	regulation of protein modification by small protein conjugation or removal	2018-03-21	291/17381	0.00494074	0.0499838	0.0314647	3309/57154/3077	3
Module 4	GO:0006479	protein methylation	2018-02-04	175/17381	0.000596806	0.0205432	0.00569063	694/51742	2
	GO:0008213	protein alkylation	2018-02-04	175/17381	0.000596806	0.0205432	0.00569063	694/51742	2
	GO:0043414	macromolecule methylation	2018-02-04	288/17381	0.00160593	0.0205432	0.00569063	694/51742	2
	GO:0010988	regulation of low-density lipoprotein particle clearance	2018-01-04	10/17381	0.00229958	0.0205432	0.00569063	29116	1
	GO:0034770	histone H4-K20 methylation	2018-01-04	10/17381	0.00229958	0.0205432	0.00569063	51742	1
	GO:0032259	methylation	2018-02-04	350/17381	0.00236187	0.0205432	0.00569063	694/51742	2
	GO:0010985	negative regulation of lipoprotein particle clearance	2018-01-04	11/17381	0.00252932	0.0205432	0.00569063	29116	1
	GO:0032802	low-density lipoprotein particle receptor catabolic process	2018-01-04	13/17381	0.00298868	0.0205432	0.00569063	29116	1
	GO:0036124	histone H3-K9 trimethylation	2018-01-04	14/17381	0.0032183	0.0205432	0.00569063	51742	1
	GO:0060009	Sertoli cell development	2018-01-04	14/17381	0.0032183	0.0205432	0.00569063	51742	1
	GO:2000269	regulation of fibroblast apoptotic process	2018-01-04	17/17381	0.00390692	0.0205432	0.00569063	694	1
	GO:0006349	regulation of gene expression by genetic imprinting	2018-01-04	18/17381	0.00413638	0.0205432	0.00569063	51742	1
	GO:0010984	regulation of lipoprotein particle clearance	2018-01-04	20/17381	0.00459518	0.0205432	0.00569063	29116	1
	GO:0044346	fibroblast apoptotic process	2018-01-04	20/17381	0.00459518	0.0205432	0.00569063	694	1
	GO:0045603	positive regulation of endothelial cell differentiation	2018-01-04	20/17381	0.00459518	0.0205432	0.00569063	694	1
	GO:0045663	positive regulation of myoblast differentiation	2018-01-04	20/17381	0.00459518	0.0205432	0.00569063	694	1
	GO:0060008	Sertoli cell differentiation	2018-01-04	20/17381	0.00459518	0.0205432	0.00569063	51742	1
	GO:0032799	low-density lipoprotein receptor particle metabolic process	2018-01-04	22/17381	0.00505383	0.0213384	0.00591091	29116	1
	GO:0071514	genetic imprinting	2018-01-04	27/17381	0.00619975	0.024799	0.00686953	51742	1
	GO:0051567	histone H3-K9 methylation	2018-01-04	29/17381	0.00665784	0.0252998	0.00700826	51742	1
	GO:0032801	receptor catabolic process	2018-01-04	33/17381	0.00757355	0.0268806	0.00744616	29116	1
	GO:0034383	low-density lipoprotein particle clearance	2018-01-04	34/17381	0.00780238	0.0268806	0.00744616	29116	1
	GO:0018023	peptidyl-lysine trimethylation	2018-01-04	37/17381	0.00848862	0.0268806	0.00744616	51742	1
	GO:0045601	regulation of endothelial cell differentiation	2018-01-04	37/17381	0.00848862	0.0268806	0.00744616	694	1
	GO:0061647	histone H3-K9 modification	2018-01-04	40/17381	0.00917451	0.0278905	0.00772591	51742	1
	GO:0031648	protein destabilization	2018-01-04	42/17381	0.00963158	0.0281538	0.00779885	29116	1
	GO:0045661	regulation of myoblast differentiation	2018-01-04	50/17381	0.0114582	0.0322528	0.0089343	694	1
	GO:0034381	plasma lipoprotein particle clearance	2018-01-04	56/17381	0.0128266	0.034815	0.00964405	29116	1
	GO:0030858	positive regulation of epithelial cell differentiation	2018-01-04	62/17381	0.0141935	0.0371968	0.0103038	694	1
	GO:0042632	cholesterol homeostasis	2018-01-04	75/17381	0.0171503	0.0420459	0.0116471	29116	1
	GO:0055092	sterol homeostasis	2018-01-04	75/17381	0.0171503	0.0420459	0.0116471	29116	1
	GO:0045445	myoblast differentiation	2018-01-04	83/17381	0.0189666	0.0450456	0.012478	694	1
	GO:0016575	histone deacetylation	2018-01-04	86/17381	0.019647	0.0452476	0.012534	51742	1
	GO:0097006	regulation of plasma lipoprotein particle levels	2018-01-04	89/17381	0.0203271	0.045437	0.0125864	29116	1
	GO:0006476	protein deacetylation	2018-01-04	99/17381	0.0225915	0.0478294	0.0132491	51742	1
	GO:0045446	endothelial cell differentiation	2018-01-04	101/17381	0.0230439	0.0478294	0.0132491	694	1
	GO:0034968	histone lysine methylation	2018-01-04	103/17381	0.0234962	0.0478294	0.0132491	51742	1
	GO:0035601	protein deacylation	2018-01-04	109/17381	0.024852	0.0478294	0.0132491	51742	1
	GO:0098732	macromolecule deacylation	2018-01-04	110/17381	0.0250778	0.0478294	0.0132491	51742	1
	GO:0051149	positive regulation of muscle cell differentiation	2018-01-04	111/17381	0.0253036	0.0478294	0.0132491	694	1
	GO:0018022	peptidyl-lysine methylation	2018-01-04	115/17381	0.0262064	0.0478294	0.0132491	51742	1
	GO:0055088	lipid homeostasis	2018-01-04	116/17381	0.026432	0.0478294	0.0132491	29116	1
	GO:0003158	endothelium development	2018-01-04	119/17381	0.0271086	0.0479128	0.0132723	694	1
Module 5	GO:0033235	positive regulation of protein sumoylation	2018-01-02	11/17381	0.00126539	0.0284712	0.000665993	7329	1
	GO:0038065	collagen-activated signaling pathway	2018-01-02	11/17381	0.00126539	0.0284712	0.000665993	1284	1
	GO:0033145	positive regulation of intracellular steroid hormone receptor signaling pathway	2018-01-02	17/17381	0.00195526	0.0293289	0.000686056	7329	1
	GO:0033233	regulation of protein sumoylation	2018-01-02	23/17381	0.00264489	0.029755	0.000696024	7329	1
	GO:0070911	global genome nucleotide-excision repair	2018-01-02	32/17381	0.0036789	0.0331101	0.000774505	7329	1
	GO:0035987	endodermal cell differentiation	2018-01-02	46/17381	0.00528628	0.0352974	0.00082567	1284	1
	GO:0001706	endoderm formation	2018-01-02	55/17381	0.00631892	0.0352974	0.00082567	1284	1
	GO:0030574	collagen catabolic process	2018-01-02	68/17381	0.00780955	0.0352974	0.00082567	1284	1
	GO:0033143	regulation of intracellular steroid hormone receptor signaling pathway	2018-01-02	75/17381	0.00861174	0.0352974	0.00082567	7329	1
	GO:0044243	multicellular organismal catabolic process	2018-01-02	76/17381	0.00872631	0.0352974	0.00082567	1284	1
	GO:0007492	endoderm development	2018-01-02	79/17381	0.00906999	0.0352974	0.00082567	1284	1
	GO:0016925	protein sumoylation	2018-01-02	94/17381	0.0107875	0.0352974	0.00082567	7329	1
	GO:0016525	negative regulation of angiogenesis	2018-01-02	110/17381	0.0126178	0.0352974	0.00082567	1284	1
	GO:2000181	negative regulation of blood vessel morphogenesis	2018-01-02	112/17381	0.0128465	0.0352974	0.00082567	1284	1
	GO:0006289	nucleotide-excision repair	2018-01-02	116/17381	0.0133037	0.0352974	0.00082567	7329	1
	GO:1901343	negative regulation of vasculature development	2018-01-02	121/17381	0.0138752	0.0352974	0.00082567	1284	1
	GO:0032963	collagen metabolic process	2018-01-02	125/17381	0.0143322	0.0352974	0.00082567	1284	1
	GO:0001704	formation of primary germ layer	2018-01-02	126/17381	0.0144465	0.0352974	0.00082567	1284	1
	GO:0044259	multicellular organismal macromolecule metabolic process	2018-01-02	130/17381	0.0149033	0.0352974	0.00082567	1284	1
	GO:0030518	intracellular steroid hormone receptor signaling pathway	2018-01-02	139/17381	0.015931	0.0358447	0.000838472	7329	1
	GO:0044236	multicellular organism metabolic process	2018-01-02	151/17381	0.0173003	0.0370721	0.000867184	1284	1
	GO:0043123	positive regulation of I-kappaB kinase/NF-kappaB signaling	2018-01-02	185/17381	0.0211749	0.0411874	0.000963448	7329	1
	GO:0007369	gastrulation	2018-01-02	187/17381	0.0214026	0.0411874	0.000963448	1284	1
	GO:0043401	steroid hormone mediated signaling pathway	2018-01-02	192/17381	0.0219717	0.0411874	0.000963448	7329	1
	GO:1903322	positive regulation of protein modification by small protein conjugation or removal	2018-01-02	200/17381	0.0228819	0.0411874	0.000963448	7329	1
	GO:0071560	cellular response to transforming growth factor beta stimulus	2018-01-02	221/17381	0.0252691	0.0421609	0.00098622	1284	1
	GO:0071559	response to transforming growth factor beta	2018-01-02	225/17381	0.0257235	0.0421609	0.00098622	1284	1
	GO:0009755	hormone-mediated signaling pathway	2018-01-02	231/17381	0.0264049	0.0421609	0.00098622	7329	1
	GO:0043122	regulation of I-kappaB kinase/NF-kappaB signaling	2018-01-02	243/17381	0.0277669	0.0421609	0.00098622	7329	1
	GO:0051091	positive regulation of DNA binding transcription factor activity	2018-01-02	246/17381	0.0281073	0.0421609	0.00098622	7329	1
	GO:0071383	cellular response to steroid hormone stimulus	2018-01-02	259/17381	0.0295815	0.0425015	0.000994188	7329	1
	GO:0007249	I-kappaB kinase/NF-kappaB signaling	2018-01-02	270/17381	0.030828	0.0425015	0.000994188	7329	1
	GO:0045765	regulation of angiogenesis	2018-01-02	273/17381	0.0311678	0.0425015	0.000994188	1284	1
	GO:0030522	intracellular receptor signaling pathway	2018-01-02	287/17381	0.0327528	0.0426928	0.000998661	7329	1
	GO:1903320	regulation of protein modification by small protein conjugation or removal	2018-01-02	291/17381	0.0332055	0.0426928	0.000998661	7329	1
	GO:1901342	regulation of vasculature development	2018-01-02	307/17381	0.0350149	0.0437687	0.00102383	1284	1
	GO:0030198	extracellular matrix organization	2018-01-02	335/17381	0.0381774	0.0453438	0.00106067	1284	1
	GO:0043062	extracellular structure organization	2018-01-02	336/17381	0.0382903	0.0453438	0.00106067	1284	1
	GO:0007059	chromosome segregation	2018-01-02	346/17381	0.0394184	0.0454828	0.00106393	7329	1
	GO:0018205	peptidyl-lysine modification	2018-01-02	381/17381	0.0433617	0.0469091	0.00109729	7329	1
	GO:0043161	proteasome-mediated ubiquitin-dependent protein catabolic process	2018-01-02	387/17381	0.0440369	0.0469091	0.00109729	7329	1
	GO:0051090	regulation of DNA binding transcription factor activity	2018-01-02	391/17381	0.0444869	0.0469091	0.00109729	7329	1
	GO:0048545	response to steroid hormone	2018-01-02	394/17381	0.0448243	0.0469091	0.00109729	7329	1
Module 6	GO:0071229	cellular response to acid chemical	2018-03-07	197/17381	4.85379e-05	0.0186715	0.00895572	80315/5562/6532	3
	GO:0042149	cellular response to glucose starvation	2018-02-07	37/17381	9.19776e-05	0.0186715	0.00895572	80315/5562	2
	GO:0001101	response to acid chemical	2018-03-07	324/17381	0.000212481	0.0257222	0.0123376	80315/5562/6532	3
	GO:0036293	response to decreased oxygen levels	2018-03-07	349/17381	0.000264579	0.0257222	0.0123376	80315/5562/6532	3
	GO:0070482	response to oxygen levels	2018-03-07	371/17381	0.000316776	0.0257222	0.0123376	80315/5562/6532	3
	GO:0031667	response to nutrient levels	2018-03-07	426/17381	0.000475482	0.0321743	0.0154323	80315/5562/6532	3
	GO:0009991	response to extracellular stimulus	2018-03-07	457/17381	0.000584121	0.033879	0.01625	80315/5562/6532	3
	GO:0008543	fibroblast growth factor receptor signaling pathway	2018-02-07	112/17381	0.000846179	0.0429436	0.0205978	51552/161742	2
	GO:0006090	pyruvate metabolic process	2018-02-07	135/17381	0.00122586	0.0459279	0.0220292	5562/3945	2
	GO:0009267	cellular response to starvation	2018-02-07	136/17381	0.00124391	0.0459279	0.0220292	80315/5562	2
	GO:0044344	cellular response to fibroblast growth factor stimulus	2018-02-07	141/17381	0.00133612	0.0459279	0.0220292	51552/161742	2
	GO:0014074	response to purine-containing compound	2018-02-07	145/17381	0.0014122	0.0459279	0.0220292	5562/6532	2
	GO:0071774	response to fibroblast growth factor	2018-02-07	148/17381	0.0014706	0.0459279	0.0220292	51552/161742	2
	GO:0019362	pyridine nucleotide metabolic process	2018-02-07	169/17381	0.00191142	0.0462252	0.0221718	5562/3945	2
	GO:0046496	nicotinamide nucleotide metabolic process	2018-02-07	169/17381	0.00191142	0.0462252	0.0221718	5562/3945	2
	GO:0042594	response to starvation	2018-02-07	172/17381	0.00197895	0.0462252	0.0221718	80315/5562	2
	GO:0072524	pyridine-containing compound metabolic process	2018-02-07	174/17381	0.00202459	0.0462252	0.0221718	5562/3945	2
	GO:1901796	regulation of signal transduction by p53 class mediator	2018-02-07	176/17381	0.00207074	0.0462252	0.0221718	5562/161742	2
	GO:0006733	oxidoreduction coenzyme metabolic process	2018-02-07	186/17381	0.002309	0.0462252	0.0221718	5562/3945	2
	GO:0031669	cellular response to nutrient levels	2018-02-07	186/17381	0.002309	0.0462252	0.0221718	80315/5562	2
	GO:0007623	circadian rhythm	2018-02-07	194/17381	0.00250859	0.0462252	0.0221718	5562/6532	2
	GO:0036294	cellular response to decreased oxygen levels	2018-02-07	201/17381	0.00268975	0.0462252	0.0221718	80315/5562	2
	GO:0031668	cellular response to extracellular stimulus	2018-02-07	215/17381	0.0030702	0.0462252	0.0221718	80315/5562	2
	GO:0071453	cellular response to oxygen levels	2018-02-07	217/17381	0.00312652	0.0462252	0.0221718	80315/5562	2
	GO:0021924	cell proliferation in external granule layer	2018-01-07	10/17381	0.00402113	0.0462252	0.0221718	6532	1
	GO:0021930	cerebellar granule cell precursor proliferation	2018-01-07	10/17381	0.00402113	0.0462252	0.0221718	6532	1
	GO:0021936	regulation of cerebellar granule cell precursor proliferation	2018-01-07	10/17381	0.00402113	0.0462252	0.0221718	6532	1
	GO:0001820	serotonin secretion	2018-01-07	11/17381	0.00442248	0.0462252	0.0221718	6532	1
	GO:0021534	cell proliferation in hindbrain	2018-01-07	11/17381	0.00442248	0.0462252	0.0221718	6532	1
	GO:0072331	signal transduction by p53 class mediator	2018-02-07	270/17381	0.00479543	0.0462252	0.0221718	5562/161742	2
	GO:0035404	histone-serine phosphorylation	2018-01-07	12/17381	0.0048237	0.0462252	0.0221718	5562	1
	GO:0051583	dopamine uptake involved in synaptic transmission	2018-01-07	12/17381	0.0048237	0.0462252	0.0221718	6532	1
	GO:0051934	catecholamine uptake involved in synaptic transmission	2018-01-07	12/17381	0.0048237	0.0462252	0.0221718	6532	1
	GO:0090493	catecholamine uptake	2018-01-07	12/17381	0.0048237	0.0462252	0.0221718	6532	1
	GO:0090494	dopamine uptake	2018-01-07	12/17381	0.0048237	0.0462252	0.0221718	6532	1
	GO:0006089	lactate metabolic process	2018-01-07	13/17381	0.00522477	0.0462252	0.0221718	3945	1
	GO:0007320	insemination	2018-01-07	13/17381	0.00522477	0.0462252	0.0221718	6532	1
	GO:0055089	fatty acid homeostasis	2018-01-07	13/17381	0.00522477	0.0462252	0.0221718	5562	1
	GO:0071496	cellular response to external stimulus	2018-02-07	288/17381	0.0054385	0.0462252	0.0221718	80315/5562	2
	GO:0010893	positive regulation of steroid biosynthetic process	2018-01-07	14/17381	0.0056257	0.0462252	0.0221718	5562	1
	GO:0043517	positive regulation of DNA damage response, signal transduction by p53 class mediator	2018-01-07	14/17381	0.0056257	0.0462252	0.0221718	161742	1
	GO:0046325	negative regulation of glucose import	2018-01-07	14/17381	0.0056257	0.0462252	0.0221718	5562	1
	GO:0071361	cellular response to ethanol	2018-01-07	14/17381	0.0056257	0.0462252	0.0221718	5562	1
	GO:0090153	regulation of sphingolipid biosynthetic process	2018-01-07	14/17381	0.0056257	0.0462252	0.0221718	5562	1
	GO:1905038	regulation of membrane lipid metabolic process	2018-01-07	14/17381	0.0056257	0.0462252	0.0221718	5562	1
	GO:2000303	regulation of ceramide biosynthetic process	2018-01-07	14/17381	0.0056257	0.0462252	0.0221718	5562	1
	GO:0010801	negative regulation of peptidyl-threonine phosphorylation	2018-01-07	15/17381	0.0060265	0.0462252	0.0221718	161742	1
	GO:0021794	thalamus development	2018-01-07	15/17381	0.0060265	0.0462252	0.0221718	6532	1
	GO:0006837	serotonin transport	2018-01-07	16/17381	0.00642716	0.0462252	0.0221718	6532	1
	GO:0031000	response to caffeine	2018-01-07	16/17381	0.00642716	0.0462252	0.0221718	5562	1
	GO:0090051	negative regulation of cell migration involved in sprouting angiogenesis	2018-01-07	16/17381	0.00642716	0.0462252	0.0221718	161742	1
	GO:0048511	rhythmic process	2018-02-07	316/17381	0.00651413	0.0462252	0.0221718	5562/6532	2
	GO:0010829	negative regulation of glucose transport	2018-01-07	17/17381	0.00682767	0.0462252	0.0221718	5562	1
	GO:0032225	regulation of synaptic transmission, dopaminergic	2018-01-07	17/17381	0.00682767	0.0462252	0.0221718	6532	1
	GO:0060977	coronary vasculature morphogenesis	2018-01-07	17/17381	0.00682767	0.0462252	0.0221718	161742	1
	GO:0071380	cellular response to prostaglandin E stimulus	2018-01-07	17/17381	0.00682767	0.0462252	0.0221718	5562	1
	GO:0072488	ammonium transmembrane transport	2018-01-07	17/17381	0.00682767	0.0462252	0.0221718	6532	1
	GO:0098810	neurotransmitter reuptake	2018-01-07	17/17381	0.00682767	0.0462252	0.0221718	6532	1
	GO:0006677	glycosylceramide metabolic process	2018-01-07	18/17381	0.00722806	0.0462252	0.0221718	5562	1
	GO:0042136	neurotransmitter biosynthetic process	2018-01-07	18/17381	0.00722806	0.0462252	0.0221718	6532	1
	GO:0045821	positive regulation of glycolytic process	2018-01-07	18/17381	0.00722806	0.0462252	0.0221718	5562	1
	GO:0043405	regulation of MAP kinase activity	2018-02-07	337/17381	0.0073802	0.0462252	0.0221718	5562/161742	2
	GO:0001666	response to hypoxia	2018-02-07	341/17381	0.00755086	0.0462252	0.0221718	5562/6532	2
	GO:0006895	Golgi to endosome transport	2018-01-07	19/17381	0.0076283	0.0462252	0.0221718	51552	1
	GO:0051194	positive regulation of cofactor metabolic process	2018-01-07	19/17381	0.0076283	0.0462252	0.0221718	5562	1
	GO:0051197	positive regulation of coenzyme metabolic process	2018-01-07	19/17381	0.0076283	0.0462252	0.0221718	5562	1
	GO:2000505	regulation of energy homeostasis	2018-01-07	19/17381	0.0076283	0.0462252	0.0221718	5562	1
	GO:0007620	copulation	2018-01-07	20/17381	0.0080284	0.0465487	0.0223269	6532	1
	GO:2000178	negative regulation of neural precursor cell proliferation	2018-01-07	20/17381	0.0080284	0.0465487	0.0223269	6532	1
	GO:2001273	regulation of glucose import in response to insulin stimulus	2018-01-07	20/17381	0.0080284	0.0465487	0.0223269	5562	1
	GO:0006732	coenzyme metabolic process	2018-02-07	355/17381	0.00816246	0.0465487	0.0223269	5562/3945	2
	GO:1901798	positive regulation of signal transduction by p53 class mediator	2018-01-07	21/17381	0.00842837	0.0465487	0.0223269	161742	1
	GO:1902932	positive regulation of alcohol biosynthetic process	2018-01-07	21/17381	0.00842837	0.0465487	0.0223269	5562	1
	GO:0044381	glucose import in response to insulin stimulus	2018-01-07	22/17381	0.00882819	0.0465487	0.0223269	5562	1
	GO:0050995	negative regulation of lipid catabolic process	2018-01-07	22/17381	0.00882819	0.0465487	0.0223269	5562	1
	GO:0071379	cellular response to prostaglandin stimulus	2018-01-07	22/17381	0.00882819	0.0465487	0.0223269	5562	1
	GO:2000765	regulation of cytoplasmic translation	2018-01-07	22/17381	0.00882819	0.0465487	0.0223269	80315	1
	GO:0001504	neurotransmitter uptake	2018-01-07	23/17381	0.00922788	0.0468315	0.0224626	6532	1
	GO:0006688	glycosphingolipid biosynthetic process	2018-01-07	23/17381	0.00922788	0.0468315	0.0224626	5562	1
	GO:0045940	positive regulation of steroid metabolic process	2018-01-07	23/17381	0.00922788	0.0468315	0.0224626	5562	1
	GO:0034695	response to prostaglandin E	2018-01-07	24/17381	0.00962743	0.048256	0.0231459	5562	1
Module 7	GO:0032496	response to lipopolysaccharide	2018-07-19	316/17381	2.56702e-08	2.50523e-05	1.22754e-05	2920/5743/6714/6352/4790/3654/355	7
	GO:0002237	response to molecule of bacterial origin	2018-07-19	333/17381	3.67875e-08	2.50523e-05	1.22754e-05	2920/5743/6714/6352/4790/3654/355	7
	GO:0070231	T cell apoptotic process	2018-04-19	48/17381	1.92459e-07	8.73764e-05	4.28137e-05	29126/6352/355/1942	4
	GO:0070228	regulation of lymphocyte apoptotic process	2018-04-19	54/17381	3.11509e-07	0.000106069	5.19728e-05	29126/6352/355/1942	4
	GO:0070227	lymphocyte apoptotic process	2018-04-19	69/17381	8.4275e-07	0.000206504	0.000101185	29126/6352/355/1942	4
	GO:0050731	positive regulation of peptidyl-tyrosine phosphorylation	2018-05-19	174/17381	9.85212e-07	0.000206504	0.000101185	3976/9021/6714/6352/1942	5
	GO:0070230	positive regulation of lymphocyte apoptotic process	2018-03-19	19/17381	1.06133e-06	0.000206504	0.000101185	29126/6352/355	3
	GO:2000106	regulation of leukocyte apoptotic process	2018-04-19	81/17381	1.60847e-06	0.000273842	0.00013418	29126/6352/355/1942	4
	GO:0071887	leukocyte apoptotic process	2018-04-19	100/17381	3.74145e-06	0.000512215	0.000250981	29126/6352/355/1942	4
	GO:2000108	positive regulation of leukocyte apoptotic process	2018-03-19	29/17381	3.97461e-06	0.000512215	0.000250981	29126/6352/355	3
	GO:0050730	regulation of peptidyl-tyrosine phosphorylation	2018-05-19	233/17381	4.13683e-06	0.000512215	0.000250981	3976/9021/6714/6352/1942	5
	GO:0030335	positive regulation of cell migration	2018-06-19	442/17381	5.35416e-06	0.000607697	0.000297766	29126/2920/5743/6714/6352/5328	6
	GO:0070232	regulation of T cell apoptotic process	2018-03-19	33/17381	5.91834e-06	0.00062006	0.000303824	29126/6352/1942	3
	GO:2000147	positive regulation of cell motility	2018-06-19	460/17381	6.73269e-06	0.000634789	0.000311041	29126/2920/5743/6714/6352/5328	6
	GO:0070555	response to interleukin-1	2018-04-19	117/17381	6.99107e-06	0.000634789	0.000311041	6714/6352/4790/3654	4
	GO:0051272	positive regulation of cellular component movement	2018-06-19	473/17381	7.898e-06	0.000672318	0.00032943	29126/2920/5743/6714/6352/5328	6
	GO:0040017	positive regulation of locomotion	2018-06-19	490/17381	9.66471e-06	0.000747015	0.000366031	29126/2920/5743/6714/6352/5328	6
	GO:0033628	regulation of cell adhesion mediated by integrin	2018-03-19	39/17381	9.87244e-06	0.000747015	0.000366031	6352/5328/1942	3
	GO:0031960	response to corticosteroid	2018-04-19	162/17381	2.52709e-05	0.00181152	0.000887631	5743/6714/1843/355	4
	GO:0071222	cellular response to lipopolysaccharide	2018-04-19	165/17381	2.71575e-05	0.00181788	0.000890745	6714/6352/4790/3654	4
	GO:0033627	cell adhesion mediated by integrin	2018-03-19	55/17381	2.8029e-05	0.00181788	0.000890745	6352/5328/1942	3
	GO:0071219	cellular response to molecule of bacterial origin	2018-04-19	173/17381	3.26943e-05	0.00202407	0.000991779	6714/6352/4790/3654	4
	GO:0070482	response to oxygen levels	2018-05-19	371/17381	3.91883e-05	0.00231735	0.00113548	5743/6714/3654/5328/355	5
	GO:0018108	peptidyl-tyrosine phosphorylation	2018-05-19	375/17381	4.12467e-05	0.00231735	0.00113548	3976/9021/6714/6352/1942	5
	GO:0018212	peptidyl-tyrosine modification	2018-05-19	378/17381	4.2845e-05	0.00231735	0.00113548	3976/9021/6714/6352/1942	5
	GO:0042531	positive regulation of tyrosine phosphorylation of STAT protein	2018-03-19	64/17381	4.42371e-05	0.00231735	0.00113548	3976/9021/6352	3
	GO:0014910	regulation of smooth muscle cell migration	2018-03-19	67/17381	5.07583e-05	0.00236989	0.00116123	6714/6352/5328	3
	GO:1900076	regulation of cellular response to insulin stimulus	2018-03-19	67/17381	5.07583e-05	0.00236989	0.00116123	9021/6714/2101	3
	GO:0071216	cellular response to biotic stimulus	2018-04-19	195/17381	5.21825e-05	0.00236989	0.00116123	6714/6352/4790/3654	4
	GO:0048545	response to steroid hormone	2018-05-19	394/17381	5.22003e-05	0.00236989	0.00116123	5743/6714/2101/1843/355	5
	GO:0033002	muscle cell proliferation	2018-04-19	199/17381	5.64763e-05	0.00248131	0.00121582	5292/5743/6352/3654	4
	GO:0001819	positive regulation of cytokine production	2018-05-19	409/17381	6.23432e-05	0.00257224	0.00126038	29126/5743/6714/4790/3654	5
	GO:0043434	response to peptide hormone	2018-05-19	410/17381	6.307e-05	0.00257224	0.00126038	5743/9021/6714/2101/4790	5
	GO:0042509	regulation of tyrosine phosphorylation of STAT protein	2018-03-19	74/17381	6.83537e-05	0.00257224	0.00126038	3976/9021/6352	3
	GO:0009612	response to mechanical stimulus	2018-04-19	210/17381	6.96166e-05	0.00257224	0.00126038	5743/6714/4790/355	4
	GO:0045088	regulation of innate immune response	2018-05-19	422/17381	7.23146e-05	0.00257224	0.00126038	9021/6714/6352/4790/3654	5
	GO:0014909	smooth muscle cell migration	2018-03-19	76/17381	7.40255e-05	0.00257224	0.00126038	6714/6352/5328	3
	GO:0060707	trophoblast giant cell differentiation	2018-02-19	12/17381	7.42357e-05	0.00257224	0.00126038	3976/9021	2
	GO:0007260	tyrosine phosphorylation of STAT protein	2018-03-19	77/17381	7.69734e-05	0.00257224	0.00126038	3976/9021/6352	3
	GO:0071453	cellular response to oxygen levels	2018-04-19	217/17381	7.90626e-05	0.00257224	0.00126038	5743/6714/3654/355	4
	GO:0048661	positive regulation of smooth muscle cell proliferation	2018-03-19	78/17381	7.9997e-05	0.00257224	0.00126038	5743/6352/3654	3
	GO:0071260	cellular response to mechanical stimulus	2018-03-19	78/17381	7.9997e-05	0.00257224	0.00126038	5743/4790/355	3
	GO:0046427	positive regulation of JAK-STAT cascade	2018-03-19	79/17381	8.30974e-05	0.00257224	0.00126038	3976/9021/6352	3
	GO:1904894	positive regulation of STAT cascade	2018-03-19	79/17381	8.30974e-05	0.00257224	0.00126038	3976/9021/6352	3
	GO:1900180	regulation of protein localization to nucleus	2018-04-19	222/17381	8.63597e-05	0.00261382	0.00128075	3976/5743/6714/51715	4
	GO:0031349	positive regulation of defense response	2018-05-19	451/17381	9.90025e-05	0.00290055	0.00142124	5743/6714/6352/4790/3654	5
	GO:0060712	spongiotrophoblast layer development	2018-02-19	14/17381	0.000102222	0.00290055	0.00142124	3976/9021	2
	GO:0070234	positive regulation of T cell apoptotic process	2018-02-19	14/17381	0.000102222	0.00290055	0.00142124	29126/6352	2
	GO:0014812	muscle cell migration	2018-03-19	87/17381	0.000110767	0.00307888	0.00150863	6714/6352/5328	3
	GO:1901652	response to peptide	2018-05-19	477/17381	0.000128883	0.00349264	0.00171136	5743/9021/6714/2101/4790	5
	GO:0071347	cellular response to interleukin-1	2018-03-19	92/17381	0.000130782	0.00349264	0.00171136	6352/4790/3654	3
	GO:0051447	negative regulation of meiotic cell cycle	2018-02-19	17/17381	0.000152473	0.00399361	0.00195684	3976/1843	2
	GO:0090130	tissue migration	2018-04-19	269/17381	0.000181057	0.00465283	0.00227985	59/5743/6714/1942	4
	GO:0070233	negative regulation of T cell apoptotic process	2018-02-19	19/17381	0.000191462	0.00481166	0.00235767	6352/1942	2
	GO:0070372	regulation of ERK1 and ERK2 cascade	2018-04-19	274/17381	0.000194303	0.00481166	0.00235767	3976/6714/6352/1843	4
	GO:0006925	inflammatory cell apoptotic process	2018-02-19	20/17381	0.000212597	0.00517066	0.00253358	6352/355	2
	GO:0030522	intracellular receptor signaling pathway	2018-04-19	287/17381	0.000232017	0.00524977	0.00257234	5292/6714/2101/3654	4
	GO:0032462	regulation of protein homooligomerization	2018-02-19	21/17381	0.000234823	0.00524977	0.00257234	6714/355	2
	GO:0046697	decidualization	2018-02-19	21/17381	0.000234823	0.00524977	0.00257234	3976/5743	2
	GO:0071498	cellular response to fluid shear stress	2018-02-19	21/17381	0.000234823	0.00524977	0.00257234	5743/6714	2
	GO:0071496	cellular response to external stimulus	2018-04-19	288/17381	0.000235122	0.00524977	0.00257234	5292/5743/4790/355	4
	GO:0070371	ERK1 and ERK2 cascade	2018-04-19	290/17381	0.000241421	0.00530347	0.00259866	3976/6714/6352/1843	4
	GO:0010226	response to lithium ion	2018-02-19	23/17381	0.000282537	0.00607321	0.00297582	5743/355	2
	GO:0071375	cellular response to peptide hormone stimulus	2018-04-19	303/17381	0.000285378	0.00607321	0.00297582	9021/6714/2101/4790	4
	GO:1990776	response to angiotensin	2018-02-19	24/17381	0.000308021	0.00645423	0.00316252	5743/6714	2
	GO:0032355	response to estradiol	2018-03-19	129/17381	0.000354797	0.00732172	0.00358758	5743/2101/1843	3
	GO:0048660	regulation of smooth muscle cell proliferation	2018-03-19	130/17381	0.000362927	0.00737771	0.00361502	5743/6352/3654	3
	GO:1900182	positive regulation of protein localization to nucleus	2018-03-19	131/17381	0.000371177	0.00743445	0.00364282	3976/5743/6714	3
	GO:0048659	smooth muscle cell proliferation	2018-03-19	133/17381	0.000388037	0.00749977	0.00367482	5743/6352/3654	3
	GO:0060706	cell differentiation involved in embryonic placenta development	2018-02-19	27/17381	0.000390957	0.00749977	0.00367482	3976/9021	2
	GO:1900078	positive regulation of cellular response to insulin stimulus	2018-02-19	27/17381	0.000390957	0.00749977	0.00367482	6714/2101	2
	GO:2000241	regulation of reproductive process	2018-03-19	138/17381	0.00043233	0.00817824	0.00400727	3976/6714/1843	3
	GO:0001666	response to hypoxia	2018-04-19	341/17381	0.000446856	0.00833723	0.00408517	5743/6714/3654/5328	4
	GO:1901653	cellular response to peptide	2018-04-19	345/17381	0.000466991	0.00859515	0.00421155	9021/6714/2101/4790	4
	GO:0045089	positive regulation of innate immune response	2018-04-19	348/17381	0.000482513	0.00862779	0.00422754	6714/6352/4790/3654	4
	GO:0070229	negative regulation of lymphocyte apoptotic process	2018-02-19	30/17381	0.000483573	0.00862779	0.00422754	6352/1942	2
	GO:0036293	response to decreased oxygen levels	2018-04-19	349/17381	0.000487768	0.00862779	0.00422754	5743/6714/3654/5328	4
	GO:0001890	placenta development	2018-03-19	147/17381	0.000520014	0.00896531	0.00439293	3976/5743/9021	3
	GO:0051384	response to glucocorticoid	2018-03-19	147/17381	0.000520014	0.00896531	0.00439293	5743/1843/355	3
	GO:0001893	maternal placenta development	2018-02-19	32/17381	0.000550667	0.0093751	0.00459372	3976/5743	2
	GO:0046425	regulation of JAK-STAT cascade	2018-03-19	153/17381	0.000584372	0.00970628	0.00475599	3976/9021/6352	3
	GO:1904892	regulation of STAT cascade	2018-03-19	153/17381	0.000584372	0.00970628	0.00475599	3976/9021/6352	3
	GO:0034504	protein localization to nucleus	2018-04-19	372/17381	0.000620303	0.0101789	0.00498759	3976/5743/6714/51715	4
	GO:2001242	regulation of intrinsic apoptotic signaling pathway	2018-03-19	159/17381	0.000653629	0.0105981	0.005193	6477/5743/6714	3
	GO:0003018	vascular process in circulatory system	2018-03-19	162/17381	0.000690142	0.0106178	0.00520261	59/5743/6714	3
	GO:2001233	regulation of apoptotic signaling pathway	2018-04-19	383/17381	0.000692002	0.0106178	0.00520261	6477/5743/6714/355	4
	GO:0014911	positive regulation of smooth muscle cell migration	2018-02-19	36/17381	0.000697615	0.0106178	0.00520261	6714/6352	2
	GO:0033280	response to vitamin D	2018-02-19	36/17381	0.000697615	0.0106178	0.00520261	5292/5743	2
	GO:2000279	negative regulation of DNA biosynthetic process	2018-02-19	36/17381	0.000697615	0.0106178	0.00520261	6714/1843	2
	GO:0050727	regulation of inflammatory response	2018-04-19	385/17381	0.000705645	0.0106178	0.00520261	5743/9021/6352/4790	4
	GO:0001959	regulation of cytokine-mediated signaling pathway	2018-03-19	165/17381	0.000727936	0.0106178	0.00520261	9021/6352/3654	3
	GO:0043409	negative regulation of MAPK cascade	2018-03-19	165/17381	0.000727936	0.0106178	0.00520261	3976/1843/1942	3
	GO:0030212	hyaluronan metabolic process	2018-02-19	37/17381	0.000736998	0.0106178	0.00520261	5292/4790	2
	GO:0034405	response to fluid shear stress	2018-02-19	37/17381	0.000736998	0.0106178	0.00520261	5743/6714	2
	GO:0030099	myeloid cell differentiation	2018-04-19	390/17381	0.000740592	0.0106178	0.00520261	3976/6714/2101/355	4
	GO:0052548	regulation of endopeptidase activity	2018-04-19	399/17381	0.000806575	0.0114433	0.00560711	5743/6714/355/1942	4
	GO:0060759	regulation of response to cytokine stimulus	2018-03-19	173/17381	0.000835121	0.0117261	0.0057457	9021/6352/3654	3
	GO:0007259	JAK-STAT cascade	2018-03-19	175/17381	0.0008634	0.0118783	0.00582026	3976/9021/6352	3
	GO:0097696	STAT cascade	2018-03-19	175/17381	0.0008634	0.0118783	0.00582026	3976/9021/6352	3
	GO:0032459	regulation of protein oligomerization	2018-02-19	41/17381	0.000905054	0.0123268	0.00604005	6714/355	2
	GO:0031648	protein destabilization	2018-02-19	42/17381	0.000949688	0.0128067	0.00627517	6477/6714	2
	GO:0061098	positive regulation of protein tyrosine kinase activity	2018-02-19	43/17381	0.000995366	0.0132647	0.00649958	6352/1942	2
	GO:0001933	negative regulation of protein phosphorylation	2018-04-19	424/17381	0.00101169	0.0132647	0.00649958	3976/9021/1843/1942	4
	GO:0031667	response to nutrient levels	2018-04-19	426/17381	0.00102955	0.0132647	0.00649958	5292/5743/6714/355	4
	GO:0052547	regulation of peptidase activity	2018-04-19	426/17381	0.00102955	0.0132647	0.00649958	5743/6714/355/1942	4
	GO:0035850	epithelial cell differentiation involved in kidney development	2018-02-19	44/17381	0.00104209	0.0132647	0.00649958	59/3976	2
	GO:0051445	regulation of meiotic cell cycle	2018-02-19	44/17381	0.00104209	0.0132647	0.00649958	3976/1843	2
	GO:0048608	reproductive structure development	2018-04-19	429/17381	0.00105676	0.0133269	0.00653007	3976/5743/9021/6714	4
	GO:0002573	myeloid leukocyte differentiation	2018-03-19	189/17381	0.00107855	0.0134277	0.00657946	3976/6714/2101	3
	GO:0061458	reproductive system development	2018-04-19	432/17381	0.00108447	0.0134277	0.00657946	3976/5743/9021/6714	4
	GO:2000107	negative regulation of leukocyte apoptotic process	2018-02-19	46/17381	0.00113864	0.0139714	0.00684588	6352/1942	2
	GO:0071456	cellular response to hypoxia	2018-03-19	194/17381	0.00116289	0.0141416	0.00692928	5743/6714/3654	3
	GO:0032869	cellular response to insulin stimulus	2018-03-19	195/17381	0.00118025	0.0142257	0.00697045	9021/6714/2101	3
	GO:0036294	cellular response to decreased oxygen levels	2018-03-19	201/17381	0.00128783	0.0152927	0.0074933	5743/6714/3654	3
	GO:0046626	regulation of insulin receptor signaling pathway	2018-02-19	49/17381	0.00129124	0.0152927	0.0074933	9021/6714	2
	GO:0051249	regulation of lymphocyte activation	2018-04-19	455/17381	0.00131426	0.0153844	0.00753824	29126/6714/6352/355	4
	GO:0010632	regulation of epithelial cell migration	2018-03-19	203/17381	0.00132503	0.0153844	0.00753824	5743/6714/1942	3
	GO:0009991	response to extracellular stimulus	2018-04-19	457/17381	0.00133574	0.0153844	0.00753824	5292/5743/6714/355	4
	GO:0071622	regulation of granulocyte chemotaxis	2018-02-19	50/17381	0.00134416	0.0153844	0.00753824	2920/6352	2
	GO:0042326	negative regulation of phosphorylation	2018-04-19	462/17381	0.00139051	0.0157748	0.00772953	3976/9021/1843/1942	4
	GO:0043281	regulation of cysteine-type endopeptidase activity involved in apoptotic process	2018-03-19	207/17381	0.00140143	0.0157748	0.00772953	5743/6714/355	3
	GO:0042110	T cell activation	2018-04-19	467/17381	0.00144684	0.0160903	0.00788413	29126/6714/6352/355	4
	GO:0007566	embryo implantation	2018-02-19	52/17381	0.00145309	0.0160903	0.00788413	3976/5743	2
	GO:2001234	negative regulation of apoptotic signaling pathway	2018-03-19	211/17381	0.00148057	0.0162624	0.00796844	5743/6714/355	3
	GO:0031663	lipopolysaccharide-mediated signaling pathway	2018-02-19	53/17381	0.00150909	0.0164431	0.00805697	6352/3654	2
	GO:0050870	positive regulation of T cell activation	2018-03-19	215/17381	0.00156248	0.0166644	0.00816544	29126/6714/6352	3
	GO:0061005	cell differentiation involved in kidney development	2018-02-19	54/17381	0.00156612	0.0166644	0.00816544	59/3976	2
	GO:2000242	negative regulation of reproductive process	2018-02-19	54/17381	0.00156612	0.0166644	0.00816544	3976/1843	2
	GO:0002521	leukocyte differentiation	2018-04-19	479/17381	0.00158857	0.0167724	0.00821832	3976/6714/2101/355	4
	GO:0009636	response to toxic substance	2018-03-19	222/17381	0.00171258	0.0179426	0.0087917	5743/6352/355	3
	GO:1903039	positive regulation of leukocyte cell-cell adhesion	2018-03-19	226/17381	0.00180228	0.0186178	0.00912258	29126/6714/6352	3
	GO:0051784	negative regulation of nuclear division	2018-02-19	58/17381	0.00180437	0.0186178	0.00912258	3976/1843	2
	GO:0051051	negative regulation of transport	2018-04-19	500/17381	0.00185961	0.0190218	0.00932052	3976/5743/4790/51715	4
	GO:0007411	axon guidance	2018-03-19	229/17381	0.00187146	0.0190218	0.00932052	6477/6714/1942	3
	GO:0097485	neuron projection guidance	2018-03-19	231/17381	0.00191849	0.0193241	0.00946865	6477/6714/1942	3
	GO:0060135	maternal process involved in female pregnancy	2018-02-19	60/17381	0.00192957	0.0193241	0.00946865	3976/5743	2
	GO:0046777	protein autophosphorylation	2018-03-19	234/17381	0.00199042	0.0197879	0.00969591	5292/6714/3654	3
	GO:2000116	regulation of cysteine-type endopeptidase activity	2018-03-19	236/17381	0.00203929	0.0201269	0.00986203	5743/6714/355	3
	GO:0045637	regulation of myeloid cell differentiation	2018-03-19	242/17381	0.00219043	0.0213254	0.0104493	3976/2101/355	3
	GO:0070373	negative regulation of ERK1 and ERK2 cascade	2018-02-19	64/17381	0.00219204	0.0213254	0.0104493	3976/1843	2
	GO:0031647	regulation of protein stability	2018-03-19	248/17381	0.00234839	0.0225247	0.0110369	6477/6714/1942	3
	GO:0032868	response to insulin	2018-03-19	248/17381	0.00234839	0.0225247	0.0110369	9021/6714/2101	3
	GO:1902105	regulation of leukocyte differentiation	2018-03-19	254/17381	0.00251328	0.0239377	0.0117293	3976/2101/355	3
	GO:0045913	positive regulation of carbohydrate metabolic process	2018-02-19	69/17381	0.00254257	0.0240484	0.0117835	6714/4790	2
	GO:0022409	positive regulation of cell-cell adhesion	2018-03-19	259/17381	0.00265607	0.0248794	0.0121907	29126/6714/6352	3
	GO:0010631	epithelial cell migration	2018-03-19	260/17381	0.00268522	0.0248794	0.0121907	5743/6714/1942	3
	GO:0051403	stress-activated MAPK cascade	2018-03-19	260/17381	0.00268522	0.0248794	0.0121907	4790/3654/355	3
	GO:0090132	epithelium migration	2018-03-19	263/17381	0.00277386	0.025527	0.012508	5743/6714/1942	3
	GO:0061097	regulation of protein tyrosine kinase activity	2018-02-19	74/17381	0.0029178	0.0266715	0.0130688	6352/1942	2
	GO:0007249	I-kappaB kinase/NF-kappaB signaling	2018-03-19	270/17381	0.00298772	0.0270217	0.0132404	5743/4790/3654	3
	GO:0032481	positive regulation of type I interferon production	2018-02-19	75/17381	0.0029958	0.0270217	0.0132404	4790/3654	2
	GO:0031295	T cell costimulation	2018-02-19	76/17381	0.00307476	0.0271937	0.0133247	29126/6714	2
	GO:0042310	vasoconstriction	2018-02-19	76/17381	0.00307476	0.0271937	0.0133247	59/5743	2
	GO:0043535	regulation of blood vessel endothelial cell migration	2018-02-19	76/17381	0.00307476	0.0271937	0.0133247	5743/1942	2
	GO:0031294	lymphocyte costimulation	2018-02-19	79/17381	0.0033175	0.0291512	0.0142838	29126/6714	2
	GO:0032103	positive regulation of response to external stimulus	2018-03-19	281/17381	0.00334394	0.0291952	0.0143054	2920/5743/6352	3
	GO:0032102	negative regulation of response to external stimulus	2018-03-19	282/17381	0.00337757	0.0293009	0.0143572	9021/4790/5328	3
	GO:0002758	innate immune response-activating signal transduction	2018-03-19	284/17381	0.00344544	0.0297006	0.014553	6714/4790/3654	3
	GO:0070098	chemokine-mediated signaling pathway	2018-02-19	81/17381	0.00348417	0.0298455	0.0146241	2920/6352	2
	GO:0018105	peptidyl-serine phosphorylation	2018-03-19	289/17381	0.0036188	0.0306137	0.0150004	3976/5743/6714	3
	GO:0031098	stress-activated protein kinase signaling cascade	2018-03-19	289/17381	0.0036188	0.0306137	0.0150004	4790/3654/355	3
	GO:0070542	response to fatty acid	2018-02-19	83/17381	0.0036547	0.0307265	0.0150557	5743/6714	2
	GO:0097193	intrinsic apoptotic signaling pathway	2018-03-19	292/17381	0.00372534	0.0308836	0.0151327	6477/5743/6714	3
	GO:0034446	substrate adhesion-dependent cell spreading	2018-02-19	84/17381	0.0037414	0.0308836	0.0151327	6714/1942	2
	GO:0097756	negative regulation of blood vessel diameter	2018-02-19	84/17381	0.0037414	0.0308836	0.0151327	59/5743	2
	GO:0071214	cellular response to abiotic stimulus	2018-03-19	296/17381	0.00387038	0.0315656	0.0154669	5743/4790/355	3
	GO:0104004	cellular response to environmental stimulus	2018-03-19	296/17381	0.00387038	0.0315656	0.0154669	5743/4790/355	3
	GO:0034612	response to tumor necrosis factor	2018-03-19	297/17381	0.00390718	0.0316761	0.015521	5743/6352/355	3
	GO:0048013	ephrin receptor signaling pathway	2018-02-19	87/17381	0.00400726	0.0322952	0.0158244	6714/1942	2
	GO:0002218	activation of innate immune response	2018-03-19	301/17381	0.00405651	0.0323098	0.0158315	6714/4790/3654	3
	GO:0033044	regulation of chromosome organization	2018-03-19	301/17381	0.00405651	0.0323098	0.0158315	3976/6714/1843	3
	GO:0030316	osteoclast differentiation	2018-02-19	88/17381	0.00409779	0.0324488	0.0158996	6714/2101	2
	GO:0002690	positive regulation of leukocyte chemotaxis	2018-02-19	89/17381	0.00418927	0.0327918	0.0160677	2920/6352	2
	GO:0042990	regulation of transcription factor import into nucleus	2018-02-19	89/17381	0.00418927	0.0327918	0.0160677	5743/51715	2
	GO:0030593	neutrophil chemotaxis	2018-02-19	90/17381	0.00428169	0.0331047	0.016221	2920/6352	2
	GO:0018209	peptidyl-serine modification	2018-03-19	308/17381	0.00432619	0.0331047	0.016221	3976/5743/6714	3
	GO:0001892	embryonic placenta development	2018-02-19	91/17381	0.00437506	0.0331047	0.016221	3976/9021	2
	GO:0033273	response to vitamin	2018-02-19	91/17381	0.00437506	0.0331047	0.016221	5292/5743	2
	GO:0042991	transcription factor import into nucleus	2018-02-19	91/17381	0.00437506	0.0331047	0.016221	5743/51715	2
	GO:0043154	negative regulation of cysteine-type endopeptidase activity involved in apoptotic process	2018-02-19	91/17381	0.00437506	0.0331047	0.016221	5743/6714	2
	GO:0009615	response to virus	2018-03-19	310/17381	0.00440521	0.0331486	0.0162425	59/6714/6352	3
	GO:0051251	positive regulation of lymphocyte activation	2018-03-19	315/17381	0.00460661	0.034402	0.0168567	29126/6714/6352	3
	GO:0031589	cell-substrate adhesion	2018-03-19	316/17381	0.00464755	0.034402	0.0168567	6714/5328/1942	3
	GO:0070997	neuron death	2018-03-19	316/17381	0.00464755	0.034402	0.0168567	6477/6352/355	3
	GO:2001243	negative regulation of intrinsic apoptotic signaling pathway	2018-02-19	95/17381	0.00475798	0.035029	0.0171639	5743/6714	2
	GO:0050863	regulation of T cell activation	2018-03-19	322/17381	0.00489789	0.0358652	0.0175736	29126/6714/6352	3
	GO:0043534	blood vessel endothelial cell migration	2018-02-19	97/17381	0.00495507	0.0360899	0.0176837	5743/1942	2
	GO:0001101	response to acid chemical	2018-03-19	324/17381	0.00498313	0.0361012	0.0176893	5743/6714/1843	3
	GO:0032147	activation of protein kinase activity	2018-03-19	325/17381	0.00502608	0.0362197	0.0177474	6714/6352/3654	3
	GO:0010038	response to metal ion	2018-03-19	327/17381	0.00511267	0.0366498	0.0179581	5743/1843/355	3
	GO:0042102	positive regulation of T cell proliferation	2018-02-19	101/17381	0.00536043	0.0380255	0.0186322	29126/6352	2
	GO:1990266	neutrophil migration	2018-02-19	101/17381	0.00536043	0.0380255	0.0186322	2920/6352	2
	GO:0033138	positive regulation of peptidyl-serine phosphorylation	2018-02-19	102/17381	0.00546408	0.0383612	0.0187967	3976/5743	2
	GO:2000278	regulation of DNA biosynthetic process	2018-02-19	102/17381	0.00546408	0.0383612	0.0187967	6714/1843	2
	GO:0043405	regulation of MAP kinase activity	2018-03-19	337/17381	0.00555924	0.0385001	0.0188647	6714/3654/1843	3
	GO:0001952	regulation of cell-matrix adhesion	2018-02-19	103/17381	0.00556866	0.0385001	0.0188647	6714/5328	2
	GO:2001237	negative regulation of extrinsic apoptotic signaling pathway	2018-02-19	103/17381	0.00556866	0.0385001	0.0188647	6714/355	2
	GO:0010639	negative regulation of organelle organization	2018-03-19	340/17381	0.00569767	0.0391931	0.0192043	3976/6714/1843	3
	GO:1903037	regulation of leukocyte cell-cell adhesion	2018-03-19	343/17381	0.00583818	0.0399578	0.019579	29126/6714/6352	3
	GO:0006939	smooth muscle contraction	2018-02-19	106/17381	0.00588792	0.0400968	0.0196471	59/5743	2
	GO:0002696	positive regulation of leukocyte activation	2018-03-19	347/17381	0.00602877	0.0408517	0.020017	29126/6714/6352	3
	GO:0045861	negative regulation of proteolysis	2018-03-19	348/17381	0.006077	0.0409746	0.0200772	5743/6714/1942	3
	GO:0002688	regulation of leukocyte chemotaxis	2018-02-19	109/17381	0.00621543	0.0417015	0.0204334	2920/6352	2
	GO:0001667	ameboidal-type cell migration	2018-03-19	353/17381	0.00632164	0.0420321	0.0205954	5743/6714/1942	3
	GO:0071621	granulocyte chemotaxis	2018-02-19	110/17381	0.00632642	0.0420321	0.0205954	2920/6352	2
	GO:0002761	regulation of myeloid leukocyte differentiation	2018-02-19	111/17381	0.00643831	0.0423622	0.0207571	3976/2101	2
	GO:2000117	negative regulation of cysteine-type endopeptidase activity	2018-02-19	111/17381	0.00643831	0.0423622	0.0207571	5743/6714	2
	GO:0050867	positive regulation of cell activation	2018-03-19	359/17381	0.00662297	0.0433677	0.0212498	29126/6714/6352	3
	GO:0019216	regulation of lipid metabolic process	2018-03-19	360/17381	0.00667402	0.0434929	0.0213111	5743/6714/4790	3
	GO:1903510	mucopolysaccharide metabolic process	2018-02-19	114/17381	0.00677944	0.0439695	0.0215447	5292/4790	2
	GO:0034605	cellular response to heat	2018-02-19	115/17381	0.00689495	0.0442968	0.021705	5743/3654	2
	GO:0050715	positive regulation of cytokine secretion	2018-02-19	115/17381	0.00689495	0.0442968	0.021705	29126/6714	2
	GO:0051348	negative regulation of transferase activity	2018-03-19	369/17381	0.00714414	0.0456823	0.0223839	9021/6714/1843	3
	GO:0050728	negative regulation of inflammatory response	2018-02-19	118/17381	0.00724686	0.0461226	0.0225997	9021/4790	2
	GO:0007159	leukocyte cell-cell adhesion	2018-03-19	374/17381	0.0074137	0.0469649	0.0230124	29126/6714/6352	3
	GO:0008286	insulin receptor signaling pathway	2018-02-19	121/17381	0.00760681	0.0477442	0.0233942	9021/6714	2
	GO:0010634	positive regulation of epithelial cell migration	2018-02-19	121/17381	0.00760681	0.0477442	0.0233942	5743/6714	2
	GO:0002223	stimulatory C-type lectin receptor signaling pathway	2018-02-19	123/17381	0.00785122	0.0486062	0.0238166	6714/4790	2
	GO:0002687	positive regulation of leukocyte migration	2018-02-19	123/17381	0.00785122	0.0486062	0.0238166	2920/6352	2
	GO:0045834	positive regulation of lipid metabolic process	2018-02-19	123/17381	0.00785122	0.0486062	0.0238166	5743/6714	2
	GO:0097530	granulocyte migration	2018-02-19	124/17381	0.00797475	0.0489262	0.0239734	2920/6352	2
	GO:2001251	negative regulation of chromosome organization	2018-02-19	124/17381	0.00797475	0.0489262	0.0239734	6714/1843	2
	GO:0032479	regulation of type I interferon production	2018-02-19	125/17381	0.00809916	0.0493467	0.0241795	4790/3654	2
	GO:0002220	innate immune response activating cell surface receptor signaling pathway	2018-02-19	126/17381	0.00822445	0.0493467	0.0241795	6714/4790	2
	GO:0032606	type I interferon production	2018-02-19	126/17381	0.00822445	0.0493467	0.0241795	4790/3654	2
	GO:0038061	NIK/NF-kappaB signaling	2018-02-19	126/17381	0.00822445	0.0493467	0.0241795	4790/3654	2
	GO:0090263	positive regulation of canonical Wnt signaling pathway	2018-02-19	126/17381	0.00822445	0.0493467	0.0241795	6714/4790	2
Module 8	GO:0010869	regulation of receptor biosynthetic process	2018-02-03	20/17381	3.77121e-06	0.000728485	0.000158554	3690/3065	2
	GO:0032800	receptor biosynthetic process	2018-02-03	24/17381	5.47733e-06	0.000728485	0.000158554	3690/3065	2
	GO:0043112	receptor metabolic process	2018-02-03	167/17381	0.000273567	0.0242563	0.00527936	3690/3065	2
	GO:0045637	regulation of myeloid cell differentiation	2018-02-03	242/17381	0.000573868	0.0313684	0.00682732	2353/3065	2
	GO:0007596	blood coagulation	2018-02-03	348/17381	0.00118332	0.0313684	0.00682732	3690/3065	2
	GO:0007599	hemostasis	2018-02-03	353/17381	0.00121738	0.0313684	0.00682732	3690/3065	2
	GO:0050817	coagulation	2018-02-03	354/17381	0.00122425	0.0313684	0.00682732	3690/3065	2
	GO:0030099	myeloid cell differentiation	2018-02-03	390/17381	0.00148422	0.0313684	0.00682732	2353/3065	2
	GO:0048545	response to steroid hormone	2018-02-03	394/17381	0.00151463	0.0313684	0.00682732	2353/3065	2
	GO:0009629	response to gravity	2018-01-03	10/17381	0.00172513	0.0313684	0.00682732	2353	1
	GO:0045713	low-density lipoprotein particle receptor biosynthetic process	2018-01-03	10/17381	0.00172513	0.0313684	0.00682732	3690	1
	GO:0010870	positive regulation of receptor biosynthetic process	2018-01-03	11/17381	0.00189753	0.0313684	0.00682732	3065	1
	GO:1903706	regulation of hemopoiesis	2018-02-03	448/17381	0.00195473	0.0313684	0.00682732	2353/3065	2
	GO:0043922	negative regulation by host of viral transcription	2018-01-03	12/17381	0.00206992	0.0313684	0.00682732	3065	1
	GO:0060766	negative regulation of androgen receptor signaling pathway	2018-01-03	12/17381	0.00206992	0.0313684	0.00682732	3065	1
	GO:0010745	negative regulation of macrophage derived foam cell differentiation	2018-01-03	13/17381	0.00224228	0.0313684	0.00682732	3690	1
	GO:0061029	eyelid development in camera-type eye	2018-01-03	13/17381	0.00224228	0.0313684	0.00682732	3065	1
	GO:0030949	positive regulation of vascular endothelial growth factor receptor signaling pathway	2018-01-03	15/17381	0.00258695	0.0313684	0.00682732	3690	1
	GO:0050746	regulation of lipoprotein metabolic process	2018-01-03	15/17381	0.00258695	0.0313684	0.00682732	3690	1
	GO:0060788	ectodermal placode formation	2018-01-03	15/17381	0.00258695	0.0313684	0.00682732	3065	1
	GO:0071697	ectodermal placode morphogenesis	2018-01-03	15/17381	0.00258695	0.0313684	0.00682732	3065	1
	GO:0071696	ectodermal placode development	2018-01-03	16/17381	0.00275925	0.0313684	0.00682732	3065	1
	GO:0010888	negative regulation of lipid storage	2018-01-03	17/17381	0.00293154	0.0313684	0.00682732	3690	1
	GO:0051412	response to corticosterone	2018-01-03	18/17381	0.0031038	0.0313684	0.00682732	2353	1
	GO:0035994	response to muscle stretch	2018-01-03	19/17381	0.00327605	0.0313684	0.00682732	2353	1
	GO:0006346	methylation-dependent chromatin silencing	2018-01-03	20/17381	0.00344827	0.0313684	0.00682732	3065	1
	GO:1902895	positive regulation of pri-miRNA transcription from RNA polymerase II promoter	2018-01-03	20/17381	0.00344827	0.0313684	0.00682732	2353	1
	GO:0043586	tongue development	2018-01-03	21/17381	0.00362048	0.0313684	0.00682732	3065	1
	GO:0070932	histone H3 deacetylation	2018-01-03	21/17381	0.00362048	0.0313684	0.00682732	3065	1
	GO:0032799	low-density lipoprotein receptor particle metabolic process	2018-01-03	22/17381	0.00379266	0.0313684	0.00682732	3690	1
	GO:0060055	angiogenesis involved in wound healing	2018-01-03	22/17381	0.00379266	0.0313684	0.00682732	3690	1
	GO:0032897	negative regulation of viral transcription	2018-01-03	24/17381	0.00413697	0.0313684	0.00682732	3065	1
	GO:0045672	positive regulation of osteoclast differentiation	2018-01-03	24/17381	0.00413697	0.0313684	0.00682732	2353	1
	GO:0035902	response to immobilization stress	2018-01-03	25/17381	0.0043091	0.0313684	0.00682732	2353	1
	GO:0030947	regulation of vascular endothelial growth factor receptor signaling pathway	2018-01-03	26/17381	0.00448121	0.0313684	0.00682732	3690	1
	GO:0043921	modulation by host of viral transcription	2018-01-03	26/17381	0.00448121	0.0313684	0.00682732	3065	1
	GO:0052472	modulation by host of symbiont transcription	2018-01-03	26/17381	0.00448121	0.0313684	0.00682732	3065	1
	GO:0060765	regulation of androgen receptor signaling pathway	2018-01-03	26/17381	0.00448121	0.0313684	0.00682732	3065	1
	GO:0052312	modulation of transcription in other organism involved in symbiotic interaction	2018-01-03	27/17381	0.00465329	0.0316502	0.00688865	3065	1
	GO:0051385	response to mineralocorticoid	2018-01-03	28/17381	0.00482536	0.0316502	0.00688865	2353	1
	GO:0010743	regulation of macrophage derived foam cell differentiation	2018-01-03	29/17381	0.00499741	0.0316502	0.00688865	3690	1
	GO:1902893	regulation of pri-miRNA transcription from RNA polymerase II promoter	2018-01-03	29/17381	0.00499741	0.0316502	0.00688865	2353	1
	GO:0071276	cellular response to cadmium ion	2018-01-03	31/17381	0.00534144	0.0317214	0.00690414	2353	1
	GO:0033144	negative regulation of intracellular steroid hormone receptor signaling pathway	2018-01-03	32/17381	0.00551343	0.0317214	0.00690414	3065	1
	GO:0061614	pri-miRNA transcription from RNA polymerase II promoter	2018-01-03	33/17381	0.00568539	0.0317214	0.00690414	2353	1
	GO:0032369	negative regulation of lipid transport	2018-01-03	34/17381	0.00585734	0.0317214	0.00690414	3690	1
	GO:0010742	macrophage derived foam cell differentiation	2018-01-03	35/17381	0.00602927	0.0317214	0.00690414	3690	1
	GO:0048333	mesodermal cell differentiation	2018-01-03	35/17381	0.00602927	0.0317214	0.00690414	3690	1
	GO:0090077	foam cell differentiation	2018-01-03	35/17381	0.00602927	0.0317214	0.00690414	3690	1
	GO:0030431	sleep	2018-01-03	36/17381	0.00620118	0.0317214	0.00690414	2353	1
	GO:0045124	regulation of bone resorption	2018-01-03	36/17381	0.00620118	0.0317214	0.00690414	3690	1
	GO:0050919	negative chemotaxis	2018-01-03	36/17381	0.00620118	0.0317214	0.00690414	3690	1
	GO:0010883	regulation of lipid storage	2018-01-03	42/17381	0.00723221	0.0362975	0.00790013	3690	1
	GO:0046850	regulation of bone remodeling	2018-01-03	44/17381	0.00757573	0.036639	0.00797445	3690	1
	GO:1904837	beta-catenin-TCF complex assembly	2018-01-03	44/17381	0.00757573	0.036639	0.00797445	3065	1
	GO:0032570	response to progesterone	2018-01-03	46/17381	0.00791916	0.037616	0.00818711	2353	1
	GO:1905953	negative regulation of lipid localization	2018-01-03	47/17381	0.00809085	0.0377573	0.00821786	3690	1
	GO:0009409	response to cold	2018-01-03	48/17381	0.00826252	0.0378936	0.00824753	2353	1
	GO:0002763	positive regulation of myeloid leukocyte differentiation	2018-01-03	50/17381	0.0086058	0.0381524	0.00830385	2353	1
	GO:0034113	heterotypic cell-cell adhesion	2018-01-03	50/17381	0.0086058	0.0381524	0.00830385	3690	1
	GO:0032922	circadian regulation of gene expression	2018-01-03	55/17381	0.00946366	0.0389339	0.00847394	3065	1
	GO:0033627	cell adhesion mediated by integrin	2018-01-03	55/17381	0.00946366	0.0389339	0.00847394	3690	1
	GO:0045453	bone resorption	2018-01-03	56/17381	0.00963517	0.0389339	0.00847394	3690	1
	GO:0070527	platelet aggregation	2018-01-03	56/17381	0.00963517	0.0389339	0.00847394	3690	1
	GO:0046686	response to cadmium ion	2018-01-03	57/17381	0.00980666	0.0389339	0.00847394	2353	1
	GO:0060395	SMAD protein signal transduction	2018-01-03	57/17381	0.00980666	0.0389339	0.00847394	2353	1
	GO:0071277	cellular response to calcium ion	2018-01-03	57/17381	0.00980666	0.0389339	0.00847394	2353	1
	GO:0019915	lipid storage	2018-01-03	63/17381	0.0108352	0.0398581	0.0086751	3690	1
	GO:0042733	embryonic digit morphogenesis	2018-01-03	63/17381	0.0108352	0.0398581	0.0086751	3065	1
	GO:0045670	regulation of osteoclast differentiation	2018-01-03	63/17381	0.0108352	0.0398581	0.0086751	2353	1
	GO:0046782	regulation of viral transcription	2018-01-03	65/17381	0.0111779	0.0398581	0.0086751	3065	1
	GO:0006305	DNA alkylation	2018-01-03	67/17381	0.0115205	0.0398581	0.0086751	2353	1
	GO:0006306	DNA methylation	2018-01-03	67/17381	0.0115205	0.0398581	0.0086751	2353	1
	GO:0030521	androgen receptor signaling pathway	2018-01-03	67/17381	0.0115205	0.0398581	0.0086751	3065	1
	GO:0051851	modification by host of symbiont morphology or physiology	2018-01-03	68/17381	0.0116918	0.0398581	0.0086751	3065	1
	GO:0035914	skeletal muscle cell differentiation	2018-01-03	69/17381	0.011863	0.0398581	0.0086751	2353	1
	GO:0008306	associative learning	2018-01-03	72/17381	0.0123767	0.0398581	0.0086751	2353	1
	GO:0051702	interaction with symbiont	2018-01-03	72/17381	0.0123767	0.0398581	0.0086751	3065	1
	GO:0001707	mesoderm formation	2018-01-03	75/17381	0.0128901	0.0398581	0.0086751	3690	1
	GO:0033143	regulation of intracellular steroid hormone receptor signaling pathway	2018-01-03	75/17381	0.0128901	0.0398581	0.0086751	3065	1
	GO:0034109	homotypic cell-cell adhesion	2018-01-03	75/17381	0.0128901	0.0398581	0.0086751	3690	1
	GO:0014909	smooth muscle cell migration	2018-01-03	76/17381	0.0130612	0.0398581	0.0086751	3690	1
	GO:0045652	regulation of megakaryocyte differentiation	2018-01-03	76/17381	0.0130612	0.0398581	0.0086751	3065	1
	GO:0048332	mesoderm morphogenesis	2018-01-03	77/17381	0.0132323	0.0398581	0.0086751	3690	1
	GO:0043044	ATP-dependent chromatin remodeling	2018-01-03	78/17381	0.0134034	0.0398581	0.0086751	3065	1
	GO:1901216	positive regulation of neuron death	2018-01-03	78/17381	0.0134034	0.0398581	0.0086751	2353	1
	GO:0001938	positive regulation of endothelial cell proliferation	2018-01-03	79/17381	0.0135745	0.0398581	0.0086751	3690	1
	GO:0046849	bone remodeling	2018-01-03	79/17381	0.0135745	0.0398581	0.0086751	3690	1
	GO:0010595	positive regulation of endothelial cell migration	2018-01-03	80/17381	0.0137455	0.0398581	0.0086751	3690	1
	GO:0044728	DNA methylation or demethylation	2018-01-03	83/17381	0.0142585	0.0398581	0.0086751	2353	1
	GO:0034103	regulation of tissue remodeling	2018-01-03	84/17381	0.0144295	0.0398581	0.0086751	3690	1
	GO:0034446	substrate adhesion-dependent cell spreading	2018-01-03	84/17381	0.0144295	0.0398581	0.0086751	3690	1
	GO:0042475	odontogenesis of dentin-containing tooth	2018-01-03	84/17381	0.0144295	0.0398581	0.0086751	3065	1
	GO:0016575	histone deacetylation	2018-01-03	86/17381	0.0147713	0.0398581	0.0086751	3065	1
	GO:0045639	positive regulation of myeloid cell differentiation	2018-01-03	86/17381	0.0147713	0.0398581	0.0086751	2353	1
	GO:0001942	hair follicle development	2018-01-03	87/17381	0.0149422	0.0398581	0.0086751	3065	1
	GO:0014812	muscle cell migration	2018-01-03	87/17381	0.0149422	0.0398581	0.0086751	3690	1
	GO:0030316	osteoclast differentiation	2018-01-03	88/17381	0.0151131	0.0398581	0.0086751	2353	1
	GO:0007044	cell-substrate junction assembly	2018-01-03	89/17381	0.015284	0.0398581	0.0086751	3690	1
	GO:0022404	molting cycle process	2018-01-03	89/17381	0.015284	0.0398581	0.0086751	3065	1
	GO:0022405	hair cycle process	2018-01-03	89/17381	0.015284	0.0398581	0.0086751	3065	1
	GO:0098773	skin epidermis development	2018-01-03	89/17381	0.015284	0.0398581	0.0086751	3065	1
	GO:0048525	negative regulation of viral process	2018-01-03	91/17381	0.0156256	0.0403535	0.00878292	3065	1
	GO:0048010	vascular endothelial growth factor receptor signaling pathway	2018-01-03	92/17381	0.0157964	0.0404024	0.00879355	3690	1
	GO:0030219	megakaryocyte differentiation	2018-01-03	93/17381	0.0159672	0.0404502	0.00880396	3065	1
	GO:0007229	integrin-mediated signaling pathway	2018-01-03	96/17381	0.0164794	0.0409675	0.00891655	3690	1
	GO:0051591	response to cAMP	2018-01-03	96/17381	0.0164794	0.0409675	0.00891655	2353	1
	GO:0006476	protein deacetylation	2018-01-03	99/17381	0.0169915	0.0418493	0.00910848	3065	1
	GO:0006304	DNA modification	2018-01-03	104/17381	0.0178445	0.0431512	0.00939182	2353	1
	GO:0051817	modification of morphology or physiology of other organism involved in symbiotic interaction	2018-01-03	104/17381	0.0178445	0.0431512	0.00939182	3065	1
	GO:0032368	regulation of lipid transport	2018-01-03	109/17381	0.018697	0.0432826	0.00942044	3690	1
	GO:0035601	protein deacylation	2018-01-03	109/17381	0.018697	0.0432826	0.00942044	3065	1
	GO:0007631	feeding behavior	2018-01-03	110/17381	0.0188674	0.0432826	0.00942044	2353	1
	GO:0098732	macromolecule deacylation	2018-01-03	110/17381	0.0188674	0.0432826	0.00942044	3065	1
	GO:0002761	regulation of myeloid leukocyte differentiation	2018-01-03	111/17381	0.0190378	0.0432826	0.00942044	2353	1
	GO:0042303	molting cycle	2018-01-03	111/17381	0.0190378	0.0432826	0.00942044	3065	1
	GO:0042633	hair cycle	2018-01-03	111/17381	0.0190378	0.0432826	0.00942044	3065	1
	GO:0001936	regulation of endothelial cell proliferation	2018-01-03	113/17381	0.0193786	0.043684	0.00950781	3690	1
	GO:0006342	chromatin silencing	2018-01-03	118/17381	0.0202303	0.0448438	0.00976022	3065	1
	GO:0046718	viral entry into host cell	2018-01-03	118/17381	0.0202303	0.0448438	0.00976022	3690	1
	GO:0051592	response to calcium ion	2018-01-03	119/17381	0.0204005	0.0448474	0.00976102	2353	1
	GO:0042476	odontogenesis	2018-01-03	120/17381	0.0205708	0.044851	0.0097618	3065	1
	GO:0010634	positive regulation of epithelial cell migration	2018-01-03	121/17381	0.020741	0.0448545	0.00976256	3690	1
	GO:0001704	formation of primary germ layer	2018-01-03	126/17381	0.0215918	0.0448917	0.00977066	3690	1
	GO:0030326	embryonic limb morphogenesis	2018-01-03	127/17381	0.021762	0.0448917	0.00977066	3065	1
	GO:0035113	embryonic appendage morphogenesis	2018-01-03	127/17381	0.021762	0.0448917	0.00977066	3065	1
	GO:0002576	platelet degranulation	2018-01-03	128/17381	0.021932	0.0448917	0.00977066	3690	1
	GO:0001935	endothelial cell proliferation	2018-01-03	130/17381	0.0222722	0.0448917	0.00977066	3690	1
	GO:0046683	response to organophosphorus	2018-01-03	131/17381	0.0224422	0.0448917	0.00977066	2353	1
	GO:0007498	mesoderm development	2018-01-03	132/17381	0.0226122	0.0448917	0.00977066	3690	1
	GO:1902107	positive regulation of leukocyte differentiation	2018-01-03	133/17381	0.0227822	0.0448917	0.00977066	2353	1
	GO:0030260	entry into host cell	2018-01-03	134/17381	0.0229522	0.0448917	0.00977066	3690	1
	GO:0044409	entry into host	2018-01-03	134/17381	0.0229522	0.0448917	0.00977066	3690	1
	GO:0045814	negative regulation of gene expression, epigenetic	2018-01-03	134/17381	0.0229522	0.0448917	0.00977066	3065	1
	GO:0051806	entry into cell of other organism involved in symbiotic interaction	2018-01-03	134/17381	0.0229522	0.0448917	0.00977066	3690	1
	GO:0051828	entry into other organism involved in symbiotic interaction	2018-01-03	134/17381	0.0229522	0.0448917	0.00977066	3690	1
	GO:0007612	learning	2018-01-03	136/17381	0.023292	0.0452238	0.00984292	2353	1
	GO:1905952	regulation of lipid localization	2018-01-03	137/17381	0.023462	0.0452238	0.00984292	3690	1
	GO:0030518	intracellular steroid hormone receptor signaling pathway	2018-01-03	139/17381	0.0238017	0.0455486	0.00991363	3065	1
	GO:0010594	regulation of endothelial cell migration	2018-01-03	143/17381	0.024481	0.0461556	0.0100457	3690	1
	GO:0014074	response to purine-containing compound	2018-01-03	145/17381	0.0248205	0.0461556	0.0100457	2353	1
	GO:0035107	appendage morphogenesis	2018-01-03	147/17381	0.02516	0.0461556	0.0100457	3065	1
	GO:0035108	limb morphogenesis	2018-01-03	147/17381	0.02516	0.0461556	0.0100457	3065	1
	GO:0035821	modification of morphology or physiology of other organism	2018-01-03	147/17381	0.02516	0.0461556	0.0100457	3065	1
	GO:0051384	response to glucocorticoid	2018-01-03	147/17381	0.02516	0.0461556	0.0100457	2353	1
	GO:0071248	cellular response to metal ion	2018-01-03	153/17381	0.0261779	0.0476939	0.0103805	2353	1
	GO:0034614	cellular response to reactive oxygen species	2018-01-03	157/17381	0.026856	0.0482469	0.0105009	2353	1
	GO:0007519	skeletal muscle tissue development	2018-01-03	158/17381	0.0270255	0.0482469	0.0105009	2353	1
	GO:0030168	platelet activation	2018-01-03	158/17381	0.0270255	0.0482469	0.0105009	3690	1
	GO:0031960	response to corticosteroid	2018-01-03	162/17381	0.0277033	0.0491271	0.0106925	2353	1
	GO:0006338	chromatin remodeling	2018-01-03	166/17381	0.0283808	0.0491271	0.0106925	3065	1
	GO:0048771	tissue remodeling	2018-01-03	166/17381	0.0283808	0.0491271	0.0106925	3690	1
	GO:0060538	skeletal muscle organ development	2018-01-03	166/17381	0.0283808	0.0491271	0.0106925	2353	1
	GO:0043901	negative regulation of multi-organism process	2018-01-03	168/17381	0.0287194	0.0491271	0.0106925	3065	1
	GO:0090090	negative regulation of canonical Wnt signaling pathway	2018-01-03	168/17381	0.0287194	0.0491271	0.0106925	3065	1
	GO:1903708	positive regulation of hemopoiesis	2018-01-03	169/17381	0.0288887	0.0491271	0.0106925	2353	1
	GO:0050679	positive regulation of epithelial cell proliferation	2018-01-03	171/17381	0.0292272	0.0491271	0.0106925	3690	1
	GO:0048736	appendage development	2018-01-03	172/17381	0.0293964	0.0491271	0.0106925	3065	1
	GO:0060173	limb development	2018-01-03	172/17381	0.0293964	0.0491271	0.0106925	3065	1
	GO:0007179	transforming growth factor beta receptor signaling pathway	2018-01-03	174/17381	0.0297348	0.0491271	0.0106925	2353	1
	GO:0050731	positive regulation of peptidyl-tyrosine phosphorylation	2018-01-03	174/17381	0.0297348	0.0491271	0.0106925	3690	1
	GO:1901796	regulation of signal transduction by p53 class mediator	2018-01-03	176/17381	0.0300731	0.0492994	0.01073	3065	1
	GO:0019083	viral transcription	2018-01-03	177/17381	0.0302423	0.0492994	0.01073	3065	1
	GO:0071241	cellular response to inorganic substance	2018-01-03	178/17381	0.0304114	0.0492994	0.01073	2353	1
	GO:0038095	Fc-epsilon receptor signaling pathway	2018-01-03	179/17381	0.0305805	0.0492994	0.01073	2353	1
Module 9	GO:0030198	extracellular matrix organization	2018-03-05	335/17381	6.89535e-05	0.0152355	0.00629779	7077/4318/1277	3
	GO:0043062	extracellular structure organization	2018-03-05	336/17381	6.95686e-05	0.0152355	0.00629779	7077/4318/1277	3
	GO:0030574	collagen catabolic process	2018-02-05	68/17381	0.000149678	0.0204862	0.00846823	4318/1277	2
	GO:0044243	multicellular organismal catabolic process	2018-02-05	76/17381	0.000187089	0.0204862	0.00846823	4318/1277	2
	GO:0022617	extracellular matrix disassembly	2018-02-05	92/17381	0.000274284	0.0240273	0.00993197	7077/4318	2
	GO:0032963	collagen metabolic process	2018-02-05	125/17381	0.000505881	0.0299491	0.0123798	4318/1277	2
	GO:0090263	positive regulation of canonical Wnt signaling pathway	2018-02-05	126/17381	0.000513981	0.0299491	0.0123798	5715/1277	2
	GO:0044259	multicellular organismal macromolecule metabolic process	2018-02-05	130/17381	0.000547015	0.0299491	0.0123798	4318/1277	2
	GO:0044236	multicellular organism metabolic process	2018-02-05	151/17381	0.000737022	0.0358684	0.0148266	4318/1277	2
	GO:0030177	positive regulation of Wnt signaling pathway	2018-02-05	160/17381	0.000826947	0.0362203	0.0149721	5715/1277	2
	GO:0000302	response to reactive oxygen species	2018-02-05	219/17381	0.00154133	0.0494882	0.0204565	4318/1277	2
	GO:0060828	regulation of canonical Wnt signaling pathway	2018-02-05	248/17381	0.00197099	0.0494882	0.0204565	5715/1277	2
	GO:0010951	negative regulation of endopeptidase activity	2018-02-05	250/17381	0.00200251	0.0494882	0.0204565	7077/4318	2
	GO:0010466	negative regulation of peptidase activity	2018-02-05	263/17381	0.00221329	0.0494882	0.0204565	7077/4318	2
	GO:0071356	cellular response to tumor necrosis factor	2018-02-05	279/17381	0.00248671	0.0494882	0.0204565	5715/1277	2
	GO:0034612	response to tumor necrosis factor	2018-02-05	297/17381	0.00281265	0.0494882	0.0204565	5715/1277	2
	GO:0051547	regulation of keratinocyte migration	2018-01-05	10/17381	0.00287373	0.0494882	0.0204565	4318	1
	GO:0060346	bone trabecula formation	2018-01-05	10/17381	0.00287373	0.0494882	0.0204565	1277	1
	GO:0060070	canonical Wnt signaling pathway	2018-02-05	302/17381	0.00290663	0.0494882	0.0204565	5715/1277	2
	GO:0045930	negative regulation of mitotic cell cycle	2018-02-05	305/17381	0.00296373	0.0494882	0.0204565	5715/7077	2
	GO:0038065	collagen-activated signaling pathway	2018-01-05	11/17381	0.00316074	0.0494882	0.0204565	1277	1
	GO:0030111	regulation of Wnt signaling pathway	2018-02-05	325/17381	0.00335803	0.0494882	0.0204565	5715/1277	2
	GO:0033197	response to vitamin E	2018-01-05	12/17381	0.00344768	0.0494882	0.0204565	1277	1
	GO:1905049	negative regulation of metallopeptidase activity	2018-01-05	12/17381	0.00344768	0.0494882	0.0204565	7077	1
	GO:0032486	Rap protein signal transduction	2018-01-05	13/17381	0.00373455	0.0494882	0.0204565	7077	1
	GO:0043248	proteasome assembly	2018-01-05	13/17381	0.00373455	0.0494882	0.0204565	5715	1
	GO:0061430	bone trabecula morphogenesis	2018-01-05	13/17381	0.00373455	0.0494882	0.0204565	1277	1
	GO:0070208	protein heterotrimerization	2018-01-05	13/17381	0.00373455	0.0494882	0.0204565	1277	1
	GO:0045861	negative regulation of proteolysis	2018-02-05	348/17381	0.00384065	0.0494882	0.0204565	7077/4318	2
	GO:1902187	negative regulation of viral release from host cell	2018-01-05	14/17381	0.00402137	0.0494882	0.0204565	81603	1
	GO:0051546	keratinocyte migration	2018-01-05	15/17381	0.00430811	0.0494882	0.0204565	4318	1
	GO:0070482	response to oxygen levels	2018-02-05	371/17381	0.00435421	0.0494882	0.0204565	5715/1277	2
	GO:0034504	protein localization to nucleus	2018-02-05	372/17381	0.00437724	0.0494882	0.0204565	81603/1277	2
	GO:0001503	ossification	2018-02-05	373/17381	0.00440033	0.0494882	0.0204565	4318/1277	2
	GO:0031331	positive regulation of cellular catabolic process	2018-02-05	396/17381	0.00494724	0.0494882	0.0204565	5715/81603	2
	GO:0042176	regulation of protein catabolic process	2018-02-05	399/17381	0.00502083	0.0494882	0.0204565	5715/7077	2
	GO:0052548	regulation of endopeptidase activity	2018-02-05	399/17381	0.00502083	0.0494882	0.0204565	7077/4318	2
	GO:0042493	response to drug	2018-02-05	411/17381	0.00532032	0.0494882	0.0204565	7077/1277	2
	GO:0046597	negative regulation of viral entry into host cell	2018-01-05	19/17381	0.00545443	0.0494882	0.0204565	81603	1
	GO:0055093	response to hyperoxia	2018-01-05	19/17381	0.00545443	0.0494882	0.0204565	1277	1
	GO:0051346	negative regulation of hydrolase activity	2018-02-05	424/17381	0.00565407	0.0494882	0.0204565	7077/4318	2
	GO:0006979	response to oxidative stress	2018-02-05	426/17381	0.00570627	0.0494882	0.0204565	4318/1277	2
	GO:0052547	regulation of peptidase activity	2018-02-05	426/17381	0.00570627	0.0494882	0.0204565	7077/4318	2
	GO:1900120	regulation of receptor binding	2018-01-05	21/17381	0.00602719	0.0494882	0.0204565	4318	1
	GO:0030335	positive regulation of cell migration	2018-02-05	442/17381	0.00613204	0.0494882	0.0204565	4318/1277	2
	GO:0009896	positive regulation of catabolic process	2018-02-05	447/17381	0.00626806	0.0494882	0.0204565	5715/81603	2
	GO:0051043	regulation of membrane protein ectodomain proteolysis	2018-01-05	22/17381	0.00631347	0.0494882	0.0204565	7077	1
	GO:0034505	tooth mineralization	2018-01-05	23/17381	0.00659969	0.0494882	0.0204565	1277	1
	GO:1904707	positive regulation of vascular smooth muscle cell proliferation	2018-01-05	23/17381	0.00659969	0.0494882	0.0204565	4318	1
	GO:2001267	regulation of cysteine-type endopeptidase activity involved in apoptotic signaling pathway	2018-01-05	23/17381	0.00659969	0.0494882	0.0204565	4318	1
	GO:2000147	positive regulation of cell motility	2018-02-05	460/17381	0.00662832	0.0494882	0.0204565	4318/1277	2
	GO:0032897	negative regulation of viral transcription	2018-01-05	24/17381	0.00688584	0.0494882	0.0204565	81603	1
	GO:1905048	regulation of metallopeptidase activity	2018-01-05	24/17381	0.00688584	0.0494882	0.0204565	7077	1
	GO:0050900	leukocyte migration	2018-02-05	471/17381	0.00694056	0.0494882	0.0204565	4318/1277	2
	GO:0051272	positive regulation of cellular component movement	2018-02-05	473/17381	0.00699805	0.0494882	0.0204565	4318/1277	2
	GO:0060351	cartilage development involved in endochondral bone morphogenesis	2018-01-05	25/17381	0.00717193	0.0494882	0.0204565	1277	1
	GO:0016055	Wnt signaling pathway	2018-02-05	481/17381	0.00723028	0.0494882	0.0204565	5715/1277	2
	GO:0198738	cell-cell signaling by wnt	2018-02-05	483/17381	0.00728889	0.0494882	0.0204565	5715/1277	2
	GO:0043312	neutrophil degranulation	2018-02-05	485/17381	0.00734773	0.0494882	0.0204565	7077/4318	2
	GO:0002283	neutrophil activation involved in immune response	2018-02-05	486/17381	0.00737723	0.0494882	0.0204565	7077/4318	2
	GO:0036296	response to increased oxygen levels	2018-01-05	26/17381	0.00745794	0.0494882	0.0204565	1277	1
	GO:0060343	trabecula formation	2018-01-05	26/17381	0.00745794	0.0494882	0.0204565	1277	1
	GO:0040017	positive regulation of locomotion	2018-02-05	490/17381	0.00749579	0.0494882	0.0204565	4318/1277	2
	GO:0001501	skeletal system development	2018-02-05	491/17381	0.00752557	0.0494882	0.0204565	4318/1277	2
	GO:0042119	neutrophil activation	2018-02-05	496/17381	0.0076753	0.0494882	0.0204565	7077/4318	2
	GO:0001958	endochondral ossification	2018-01-05	27/17381	0.0077439	0.0494882	0.0204565	1277	1
	GO:0036075	replacement ossification	2018-01-05	27/17381	0.0077439	0.0494882	0.0204565	1277	1
	GO:0002446	neutrophil mediated immunity	2018-02-05	499/17381	0.0077658	0.0494882	0.0204565	7077/4318	2
	GO:0051051	negative regulation of transport	2018-02-05	500/17381	0.00779608	0.0494882	0.0204565	5715/4318	2
Module 10	GO:0021877	forebrain neuron fate commitment	2018-01-02	10/17381	0.00115038	0.0238542	0.00164653	23314	1
	GO:0003084	positive regulation of systemic arterial blood pressure	2018-01-02	12/17381	0.00138038	0.0238542	0.00164653	65125	1
	GO:0030157	pancreatic juice secretion	2018-01-02	13/17381	0.00149537	0.0238542	0.00164653	65125	1
	GO:0002076	osteoblast development	2018-01-02	17/17381	0.00195526	0.0238542	0.00164653	23314	1
	GO:0060457	negative regulation of digestive system process	2018-01-02	17/17381	0.00195526	0.0238542	0.00164653	65125	1
	GO:0032941	secretion by tissue	2018-01-02	39/17381	0.00448275	0.031335	0.0021629	65125	1
	GO:0045777	positive regulation of blood pressure	2018-01-02	39/17381	0.00448275	0.031335	0.0021629	65125	1
	GO:0044058	regulation of digestive system process	2018-01-02	41/17381	0.00471237	0.031335	0.0021629	65125	1
	GO:0021879	forebrain neuron differentiation	2018-01-02	54/17381	0.00620421	0.031335	0.0021629	23314	1
	GO:0071277	cellular response to calcium ion	2018-01-02	57/17381	0.00654832	0.031335	0.0021629	65125	1
	GO:0021872	forebrain generation of neurons	2018-01-02	64/17381	0.00735102	0.031335	0.0021629	23314	1
	GO:0009880	embryonic pattern specification	2018-01-02	65/17381	0.00746566	0.031335	0.0021629	23314	1
	GO:0048663	neuron fate commitment	2018-01-02	68/17381	0.00780955	0.031335	0.0021629	23314	1
	GO:0010923	negative regulation of phosphatase activity	2018-01-02	71/17381	0.00815339	0.031335	0.0021629	65125	1
	GO:0035305	negative regulation of dephosphorylation	2018-01-02	80/17381	0.00918453	0.031335	0.0021629	65125	1
	GO:0002028	regulation of sodium ion transport	2018-01-02	83/17381	0.00952813	0.031335	0.0021629	65125	1
	GO:0003073	regulation of systemic arterial blood pressure	2018-01-02	89/17381	0.0102151	0.031335	0.0021629	65125	1
	GO:0007589	body fluid secretion	2018-01-02	90/17381	0.0103296	0.031335	0.0021629	65125	1
	GO:0060021	palate development	2018-01-02	92/17381	0.0105586	0.031335	0.0021629	23314	1
	GO:0048704	embryonic skeletal system morphogenesis	2018-01-02	93/17381	0.010673	0.031335	0.0021629	23314	1
	GO:0022600	digestive system process	2018-01-02	94/17381	0.0107875	0.031335	0.0021629	65125	1
	GO:0010921	regulation of phosphatase activity	2018-01-02	110/17381	0.0126178	0.0333575	0.0023025	65125	1
	GO:0018107	peptidyl-threonine phosphorylation	2018-01-02	117/17381	0.013418	0.0333575	0.0023025	65125	1
	GO:0051592	response to calcium ion	2018-01-02	119/17381	0.0136466	0.0333575	0.0023025	65125	1
	GO:0048706	embryonic skeletal system development	2018-01-02	122/17381	0.0139895	0.0333575	0.0023025	23314	1
	GO:0018210	peptidyl-threonine modification	2018-01-02	124/17381	0.014218	0.0333575	0.0023025	65125	1
	GO:0071901	negative regulation of protein serine/threonine kinase activity	2018-01-02	131/17381	0.0150176	0.0339286	0.00234192	65125	1
	GO:0001764	neuron migration	2018-01-02	141/17381	0.0161593	0.0344703	0.00237931	23314	1
	GO:0035303	regulation of dephosphorylation	2018-01-02	143/17381	0.0163875	0.0344703	0.00237931	65125	1
	GO:0071248	cellular response to metal ion	2018-01-02	153/17381	0.0175284	0.035301	0.00243665	65125	1
	GO:0006338	chromatin remodeling	2018-01-02	166/17381	0.0190106	0.035301	0.00243665	23314	1
	GO:0007586	digestion	2018-01-02	168/17381	0.0192386	0.035301	0.00243665	65125	1
	GO:0021953	central nervous system neuron differentiation	2018-01-02	171/17381	0.0195804	0.035301	0.00243665	23314	1
	GO:0008217	regulation of blood pressure	2018-01-02	175/17381	0.0200361	0.035301	0.00243665	65125	1
	GO:0071241	cellular response to inorganic substance	2018-01-02	178/17381	0.0203778	0.035301	0.00243665	65125	1
	GO:0051216	cartilage development	2018-01-02	182/17381	0.0208334	0.035301	0.00243665	23314	1
	GO:0001649	osteoblast differentiation	2018-01-02	207/17381	0.023678	0.037746	0.00260542	23314	1
	GO:0051048	negative regulation of secretion	2018-01-02	210/17381	0.024019	0.037746	0.00260542	65125	1
	GO:0048705	skeletal system morphogenesis	2018-01-02	211/17381	0.0241327	0.037746	0.00260542	23314	1
	GO:0006814	sodium ion transport	2018-01-02	226/17381	0.0258371	0.0393392	0.00271539	65125	1
	GO:0046777	protein autophosphorylation	2018-01-02	234/17381	0.0267455	0.0393392	0.00271539	65125	1
	GO:0061448	connective tissue development	2018-01-02	237/17381	0.027086	0.0393392	0.00271539	23314	1
	GO:0045165	cell fate commitment	2018-01-02	253/17381	0.0289012	0.040382	0.00278737	23314	1
	GO:0006469	negative regulation of protein kinase activity	2018-01-02	255/17381	0.029128	0.040382	0.00278737	65125	1
	GO:0033673	negative regulation of kinase activity	2018-01-02	273/17381	0.0311678	0.0422497	0.00291629	65125	1
	GO:0048562	embryonic organ morphogenesis	2018-01-02	283/17381	0.0323001	0.0428328	0.00295653	23314	1
	GO:0032147	activation of protein kinase activity	2018-01-02	325/17381	0.0370486	0.0473696	0.00326968	65125	1
	GO:0010038	response to metal ion	2018-01-02	327/17381	0.0372744	0.0473696	0.00326968	65125	1
	GO:0010959	regulation of metal ion transport	2018-01-02	356/17381	0.0405459	0.0498101	0.00343815	65125	1
	GO:0030900	forebrain development	2018-01-02	366/17381	0.0416727	0.0498101	0.00343815	23314	1
	GO:0051348	negative regulation of transferase activity	2018-01-02	369/17381	0.0420106	0.0498101	0.00343815	65125	1
	GO:0001503	ossification	2018-01-02	373/17381	0.0424611	0.0498101	0.00343815	23314	1
Module 11	GO:0033137	negative regulation of peptidyl-serine phosphorylation	2018-02-06	26/17381	3.21573e-05	0.00338379	0.00153496	3082/9770	2
	GO:0032872	regulation of stress-activated MAPK cascade	2018-03-06	212/17381	3.48273e-05	0.00338379	0.00153496	9448/3082/9770	3
	GO:0070302	regulation of stress-activated protein kinase signaling cascade	2018-03-06	213/17381	3.53202e-05	0.00338379	0.00153496	9448/3082/9770	3
	GO:0070570	regulation of neuron projection regeneration	2018-02-06	28/17381	3.739e-05	0.00338379	0.00153496	9448/3082	2
	GO:0051403	stress-activated MAPK cascade	2018-03-06	260/17381	6.40106e-05	0.00463437	0.00210224	9448/3082/9770	3
	GO:0031098	stress-activated protein kinase signaling cascade	2018-03-06	289/17381	8.76766e-05	0.00528982	0.00239957	9448/3082/9770	3
	GO:0031102	neuron projection regeneration	2018-02-06	54/17381	0.000140984	0.00729087	0.00330729	9448/3082	2
	GO:0048010	vascular endothelial growth factor receptor signaling pathway	2018-02-06	92/17381	0.000410007	0.0185528	0.00841594	63916/9475	2
	GO:0045667	regulation of osteoblast differentiation	2018-02-06	113/17381	0.000617811	0.0248497	0.0112723	3082/9770	2
	GO:0033135	regulation of peptidyl-serine phosphorylation	2018-02-06	134/17381	0.000867186	0.0313921	0.0142401	3082/9770	2
	GO:0046328	regulation of JNK cascade	2018-02-06	168/17381	0.00135802	0.0446914	0.0202729	9448/9770	2
	GO:0030278	regulation of ossification	2018-02-06	184/17381	0.00162585	0.0462517	0.0209807	3082/9770	2
	GO:0031099	regeneration	2018-02-06	186/17381	0.00166097	0.0462517	0.0209807	9448/3082	2
	GO:0007254	JNK cascade	2018-02-06	199/17381	0.00189813	0.0490801	0.0222637	9448/9770	2
	GO:0001649	osteoblast differentiation	2018-02-06	207/17381	0.00205168	0.0495138	0.0224605	3082/9770	2
Module 12	GO:0042035	regulation of cytokine biosynthetic process	2018-03-07	97/17381	5.80264e-06	0.00134748	0.000591742	1051/10643/3162	3
	GO:0042089	cytokine biosynthetic process	2018-03-07	108/17381	8.01946e-06	0.00134748	0.000591742	1051/10643/3162	3
	GO:0042107	cytokine metabolic process	2018-03-07	110/17381	8.4747e-06	0.00134748	0.000591742	1051/10643/3162	3
	GO:0060850	regulation of transcription involved in cell fate commitment	2018-02-07	16/17381	1.66395e-05	0.00198426	0.000871383	5080/1051	2
	GO:0097421	liver regeneration	2018-02-07	35/17381	8.22038e-05	0.00784224	0.00344391	1051/3162	2
	GO:0050673	epithelial cell proliferation	2018-03-07	361/17381	0.00029229	0.0213107	0.00935854	5080/1051/3162	3
	GO:0030574	collagen catabolic process	2018-02-07	68/17381	0.000312735	0.0213107	0.00935854	4312/4322	2
	GO:0044243	multicellular organismal catabolic process	2018-02-07	76/17381	0.000390662	0.0220616	0.0096883	4312/4322	2
	GO:0031100	animal organ regeneration	2018-02-07	80/17381	0.000432822	0.0220616	0.0096883	1051/3162	2
	GO:0048732	gland development	2018-03-07	422/17381	0.000462507	0.0220616	0.0096883	5080/1051/3162	3
	GO:0022617	extracellular matrix disassembly	2018-02-07	92/17381	0.000572032	0.0248054	0.0108932	4312/4322	2
	GO:0043618	regulation of transcription from RNA polymerase II promoter in response to stress	2018-02-07	113/17381	0.00086126	0.0301011	0.0132188	1051/3162	2
	GO:0022612	gland morphogenesis	2018-02-07	119/17381	0.000954478	0.0301011	0.0132188	5080/1051	2
	GO:0043620	regulation of DNA-templated transcription in response to stress	2018-02-07	119/17381	0.000954478	0.0301011	0.0132188	1051/3162	2
	GO:0032963	collagen metabolic process	2018-02-07	125/17381	0.00105237	0.0301011	0.0132188	4312/4322	2
	GO:0044259	multicellular organismal macromolecule metabolic process	2018-02-07	130/17381	0.0011375	0.0301011	0.0132188	4312/4322	2
	GO:0001889	liver development	2018-02-07	133/17381	0.00119013	0.0301011	0.0132188	1051/3162	2
	GO:0042542	response to hydrogen peroxide	2018-02-07	134/17381	0.00120793	0.0301011	0.0132188	8061/3162	2
	GO:0061008	hepaticobiliary system development	2018-02-07	136/17381	0.00124391	0.0301011	0.0132188	1051/3162	2
	GO:0043524	negative regulation of neuron apoptotic process	2018-02-07	137/17381	0.0012621	0.0301011	0.0132188	1051/3162	2
	GO:0001890	placenta development	2018-02-07	147/17381	0.001451	0.0329585	0.0144737	8061/1051	2
	GO:0044236	multicellular organism metabolic process	2018-02-07	151/17381	0.00153015	0.0331763	0.0145693	4312/4322	2
	GO:0002695	negative regulation of leukocyte activation	2018-02-07	155/17381	0.00161132	0.0334175	0.0146752	1051/3162	2
	GO:0050866	negative regulation of cell activation	2018-02-07	174/17381	0.00202459	0.0402388	0.0176708	1051/3162	2
	GO:0031099	regeneration	2018-02-07	186/17381	0.002309	0.0423613	0.0186029	1051/3162	2
	GO:1901215	negative regulation of neuron death	2018-02-07	186/17381	0.002309	0.0423613	0.0186029	1051/3162	2
	GO:0043523	regulation of neuron apoptotic process	2018-02-07	195/17381	0.0025341	0.0447691	0.0196603	1051/3162	2
	GO:0031668	cellular response to extracellular stimulus	2018-02-07	215/17381	0.0030702	0.0452333	0.0198641	8061/3162	2
	GO:0000302	response to reactive oxygen species	2018-02-07	219/17381	0.00318332	0.0452333	0.0198641	8061/3162	2
	GO:0051402	neuron apoptotic process	2018-02-07	221/17381	0.00324062	0.0452333	0.0198641	1051/3162	2
	GO:0031334	positive regulation of protein complex assembly	2018-02-07	232/17381	0.00356445	0.0452333	0.0198641	8061/4312	2
	GO:0007611	learning or memory	2018-02-07	234/17381	0.00362491	0.0452333	0.0198641	8061/1051	2
	GO:0002887	negative regulation of myeloid leukocyte mediated immunity	2018-01-07	10/17381	0.00402113	0.0452333	0.0198641	3162	1
	GO:0007028	cytoplasm organization	2018-01-07	10/17381	0.00402113	0.0452333	0.0198641	8061	1
	GO:0009629	response to gravity	2018-01-07	10/17381	0.00402113	0.0452333	0.0198641	8061	1
	GO:0021877	forebrain neuron fate commitment	2018-01-07	10/17381	0.00402113	0.0452333	0.0198641	5080	1
	GO:0045080	positive regulation of chemokine biosynthetic process	2018-01-07	10/17381	0.00402113	0.0452333	0.0198641	3162	1
	GO:0061072	iris morphogenesis	2018-01-07	10/17381	0.00402113	0.0452333	0.0198641	5080	1
	GO:0071281	cellular response to iron ion	2018-01-07	10/17381	0.00402113	0.0452333	0.0198641	3162	1
	GO:0045165	cell fate commitment	2018-02-07	253/17381	0.00422334	0.0452333	0.0198641	5080/1051	2
	GO:0021521	ventral spinal cord interneuron specification	2018-01-07	11/17381	0.00442248	0.0452333	0.0198641	5080	1
	GO:0033004	negative regulation of mast cell activation	2018-01-07	11/17381	0.00442248	0.0452333	0.0198641	3162	1
	GO:0043301	negative regulation of leukocyte degranulation	2018-01-07	11/17381	0.00442248	0.0452333	0.0198641	3162	1
	GO:0043619	regulation of transcription from RNA polymerase II promoter in response to oxidative stress	2018-01-07	11/17381	0.00442248	0.0452333	0.0198641	3162	1
	GO:0060573	cell fate specification involved in pattern specification	2018-01-07	11/17381	0.00442248	0.0452333	0.0198641	5080	1
	GO:1990440	positive regulation of transcription from RNA polymerase II promoter in response to endoplasmic reticulum stress	2018-01-07	11/17381	0.00442248	0.0452333	0.0198641	1051	1
	GO:0021903	rostrocaudal neural tube patterning	2018-01-07	12/17381	0.0048237	0.0452333	0.0198641	5080	1
	GO:0048505	regulation of timing of cell differentiation	2018-01-07	12/17381	0.0048237	0.0452333	0.0198641	5080	1
	GO:0050890	cognition	2018-02-07	271/17381	0.00483016	0.0452333	0.0198641	8061/1051	2
	GO:1901214	regulation of neuron death	2018-02-07	280/17381	0.00514798	0.0452333	0.0198641	1051/3162	2
	GO:0021520	spinal cord motor neuron cell fate specification	2018-01-07	13/17381	0.00522477	0.0452333	0.0198641	5080	1
	GO:0021781	glial cell fate commitment	2018-01-07	13/17381	0.00522477	0.0452333	0.0198641	5080	1
	GO:0021978	telencephalon regionalization	2018-01-07	13/17381	0.00522477	0.0452333	0.0198641	5080	1
	GO:0040034	regulation of development, heterochronic	2018-01-07	13/17381	0.00522477	0.0452333	0.0198641	5080	1
	GO:0045073	regulation of chemokine biosynthetic process	2018-01-07	13/17381	0.00522477	0.0452333	0.0198641	3162	1
	GO:0071496	cellular response to external stimulus	2018-02-07	288/17381	0.0054385	0.0452333	0.0198641	8061/3162	2
	GO:0097193	intrinsic apoptotic signaling pathway	2018-02-07	292/17381	0.00558657	0.0452333	0.0198641	1051/3162	2
	GO:0042033	chemokine biosynthetic process	2018-01-07	14/17381	0.0056257	0.0452333	0.0198641	3162	1
	GO:0003417	growth plate cartilage development	2018-01-07	15/17381	0.0060265	0.0452333	0.0198641	4322	1
	GO:0050755	chemokine metabolic process	2018-01-07	15/17381	0.0060265	0.0452333	0.0198641	3162	1
	GO:0060579	ventral spinal cord interneuron fate commitment	2018-01-07	15/17381	0.0060265	0.0452333	0.0198641	5080	1
	GO:0060581	cell fate commitment involved in pattern specification	2018-01-07	15/17381	0.0060265	0.0452333	0.0198641	5080	1
	GO:0071243	cellular response to arsenic-containing substance	2018-01-07	15/17381	0.0060265	0.0452333	0.0198641	3162	1
	GO:0009950	dorsal/ventral axis specification	2018-01-07	16/17381	0.00642716	0.0452333	0.0198641	5080	1
	GO:0045408	regulation of interleukin-6 biosynthetic process	2018-01-07	16/17381	0.00642716	0.0452333	0.0198641	1051	1
	GO:0001701	in utero embryonic development	2018-02-07	315/17381	0.00647415	0.0452333	0.0198641	8061/1051	2
	GO:0070997	neuron death	2018-02-07	316/17381	0.00651413	0.0452333	0.0198641	1051/3162	2
	GO:0021514	ventral spinal cord interneuron differentiation	2018-01-07	17/17381	0.00682767	0.0452333	0.0198641	5080	1
	GO:0060644	mammary gland epithelial cell differentiation	2018-01-07	17/17381	0.00682767	0.0452333	0.0198641	1051	1
	GO:0072574	hepatocyte proliferation	2018-01-07	17/17381	0.00682767	0.0452333	0.0198641	1051	1
	GO:0072575	epithelial cell proliferation involved in liver morphogenesis	2018-01-07	17/17381	0.00682767	0.0452333	0.0198641	1051	1
	GO:1904706	negative regulation of vascular smooth muscle cell proliferation	2018-01-07	17/17381	0.00682767	0.0452333	0.0198641	3162	1
	GO:0042226	interleukin-6 biosynthetic process	2018-01-07	18/17381	0.00722806	0.0454563	0.0199621	1051	1
	GO:0051412	response to corticosterone	2018-01-07	18/17381	0.00722806	0.0454563	0.0199621	8061	1
	GO:0072576	liver morphogenesis	2018-01-07	18/17381	0.00722806	0.0454563	0.0199621	1051	1
	GO:0030198	extracellular matrix organization	2018-02-07	335/17381	0.00729554	0.0454563	0.0199621	4312/4322	2
	GO:0043062	extracellular structure organization	2018-02-07	336/17381	0.00733781	0.0454563	0.0199621	4312/4322	2
	GO:0008356	asymmetric cell division	2018-01-07	19/17381	0.0076283	0.0466213	0.0204737	5080	1
	GO:0023019	signal transduction involved in regulation of gene expression	2018-01-07	20/17381	0.0080284	0.0466213	0.0204737	5080	1
	GO:0051187	cofactor catabolic process	2018-01-07	20/17381	0.0080284	0.0466213	0.0204737	3162	1
	GO:2000178	negative regulation of neural precursor cell proliferation	2018-01-07	20/17381	0.0080284	0.0466213	0.0204737	5080	1
	GO:0000132	establishment of mitotic spindle orientation	2018-01-07	21/17381	0.00842837	0.0466213	0.0204737	5080	1
	GO:0002052	positive regulation of neuroblast proliferation	2018-01-07	21/17381	0.00842837	0.0466213	0.0204737	5080	1
	GO:0003416	endochondral bone growth	2018-01-07	22/17381	0.00882819	0.0466213	0.0204737	4322	1
	GO:0021513	spinal cord dorsal/ventral patterning	2018-01-07	22/17381	0.00882819	0.0466213	0.0204737	5080	1
	GO:0032753	positive regulation of interleukin-4 production	2018-01-07	22/17381	0.00882819	0.0466213	0.0204737	1051	1
	GO:0061082	myeloid leukocyte cytokine production	2018-01-07	22/17381	0.00882819	0.0466213	0.0204737	3162	1
	GO:1903306	negative regulation of regulated secretory pathway	2018-01-07	22/17381	0.00882819	0.0466213	0.0204737	3162	1
	GO:0001503	ossification	2018-02-07	373/17381	0.00898114	0.0466213	0.0204737	1051/4322	2
	GO:0002068	glandular epithelial cell development	2018-01-07	24/17381	0.00962743	0.0466213	0.0204737	5080	1
	GO:0021511	spinal cord patterning	2018-01-07	24/17381	0.00962743	0.0466213	0.0204737	5080	1
	GO:0021871	forebrain regionalization	2018-01-07	24/17381	0.00962743	0.0466213	0.0204737	5080	1
	GO:0032461	positive regulation of protein oligomerization	2018-01-07	24/17381	0.00962743	0.0466213	0.0204737	4312	1
	GO:0036003	positive regulation of transcription from RNA polymerase II promoter in response to stress	2018-01-07	24/17381	0.00962743	0.0466213	0.0204737	1051	1
	GO:0098868	bone growth	2018-01-07	24/17381	0.00962743	0.0466213	0.0204737	4322	1
	GO:0051090	regulation of DNA binding transcription factor activity	2018-02-07	391/17381	0.00983583	0.0466213	0.0204737	8061/3162	2
	GO:0043254	regulation of protein complex assembly	2018-02-07	392/17381	0.00988436	0.0466213	0.0204737	8061/4312	2
	GO:0002719	negative regulation of cytokine production involved in immune response	2018-01-07	25/17381	0.0100268	0.0466213	0.0204737	3162	1
	GO:0003309	type B pancreatic cell differentiation	2018-01-07	25/17381	0.0100268	0.0466213	0.0204737	5080	1
	GO:0040001	establishment of mitotic spindle localization	2018-01-07	25/17381	0.0100268	0.0466213	0.0204737	5080	1
	GO:0048596	embryonic camera-type eye morphogenesis	2018-01-07	25/17381	0.0100268	0.0466213	0.0204737	5080	1
	GO:0060351	cartilage development involved in endochondral bone morphogenesis	2018-01-07	25/17381	0.0100268	0.0466213	0.0204737	4322	1
	GO:0033598	mammary gland epithelial cell proliferation	2018-01-07	26/17381	0.0104261	0.0466213	0.0204737	1051	1
	GO:0051294	establishment of spindle orientation	2018-01-07	26/17381	0.0104261	0.0466213	0.0204737	5080	1
	GO:0001819	positive regulation of cytokine production	2018-02-07	409/17381	0.0107261	0.0466213	0.0204737	1051/3162	2
	GO:0001958	endochondral ossification	2018-01-07	27/17381	0.0108253	0.0466213	0.0204737	4322	1
	GO:0032673	regulation of interleukin-4 production	2018-01-07	27/17381	0.0108253	0.0466213	0.0204737	1051	1
	GO:0035883	enteroendocrine cell differentiation	2018-01-07	27/17381	0.0108253	0.0466213	0.0204737	5080	1
	GO:0036075	replacement ossification	2018-01-07	27/17381	0.0108253	0.0466213	0.0204737	4322	1
	GO:2000144	positive regulation of DNA-templated transcription, initiation	2018-01-07	27/17381	0.0108253	0.0466213	0.0204737	8061	1
	GO:0002683	negative regulation of immune system process	2018-02-07	412/17381	0.0108779	0.0466213	0.0204737	1051/3162	2
	GO:0051385	response to mineralocorticoid	2018-01-07	28/17381	0.0112243	0.0466213	0.0204737	8061	1
	GO:1902692	regulation of neuroblast proliferation	2018-01-07	28/17381	0.0112243	0.0466213	0.0204737	5080	1
	GO:0048568	embryonic organ development	2018-02-07	422/17381	0.011391	0.0466213	0.0204737	5080/1051	2
	GO:0006979	response to oxidative stress	2018-02-07	426/17381	0.0115993	0.0466213	0.0204737	8061/3162	2
	GO:0016242	negative regulation of macroautophagy	2018-01-07	29/17381	0.0116231	0.0466213	0.0204737	3162	1
	GO:0042168	heme metabolic process	2018-01-07	29/17381	0.0116231	0.0466213	0.0204737	3162	1
	GO:0046685	response to arsenic-containing substance	2018-01-07	29/17381	0.0116231	0.0466213	0.0204737	3162	1
	GO:0048608	reproductive structure development	2018-02-07	429/17381	0.0117566	0.0466213	0.0204737	8061/1051	2
	GO:0061458	reproductive system development	2018-02-07	432/17381	0.0119149	0.0466213	0.0204737	8061/1051	2
	GO:0033006	regulation of mast cell activation involved in immune response	2018-01-07	30/17381	0.0120218	0.0466213	0.0204737	3162	1
	GO:0043304	regulation of mast cell degranulation	2018-01-07	30/17381	0.0120218	0.0466213	0.0204737	3162	1
	GO:0045920	negative regulation of exocytosis	2018-01-07	30/17381	0.0120218	0.0466213	0.0204737	3162	1
	GO:0042462	eye photoreceptor cell development	2018-01-07	31/17381	0.0124204	0.0470202	0.0206488	5080	1
	GO:0060674	placenta blood vessel development	2018-01-07	31/17381	0.0124204	0.0470202	0.0206488	8061	1
	GO:0071276	cellular response to cadmium ion	2018-01-07	31/17381	0.0124204	0.0470202	0.0206488	3162	1
	GO:0021522	spinal cord motor neuron differentiation	2018-01-07	32/17381	0.0128189	0.0470618	0.0206671	5080	1
	GO:0051656	establishment of organelle localization	2018-02-07	450/17381	0.0128847	0.0470618	0.0206671	5080/3162	2
	GO:0032633	interleukin-4 production	2018-01-07	33/17381	0.0132172	0.0470618	0.0206671	1051	1
	GO:0048665	neuron fate specification	2018-01-07	33/17381	0.0132172	0.0470618	0.0206671	5080	1
	GO:0061614	pri-miRNA transcription from RNA polymerase II promoter	2018-01-07	33/17381	0.0132172	0.0470618	0.0206671	8061	1
	GO:0009991	response to extracellular stimulus	2018-02-07	457/17381	0.0132712	0.0470618	0.0206671	8061/3162	2
	GO:0002701	negative regulation of production of molecular mediator of immune response	2018-01-07	34/17381	0.0136154	0.0470618	0.0206671	3162	1
	GO:0007435	salivary gland morphogenesis	2018-01-07	34/17381	0.0136154	0.0470618	0.0206671	5080	1
	GO:0010039	response to iron ion	2018-01-07	34/17381	0.0136154	0.0470618	0.0206671	3162	1
	GO:0034383	low-density lipoprotein particle clearance	2018-01-07	34/17381	0.0136154	0.0470618	0.0206671	3162	1
	GO:0048048	embryonic eye morphogenesis	2018-01-07	34/17381	0.0136154	0.0470618	0.0206671	5080	1
	GO:0051293	establishment of spindle localization	2018-01-07	34/17381	0.0136154	0.0470618	0.0206671	5080	1
	GO:0050900	leukocyte migration	2018-02-07	471/17381	0.0140595	0.0482474	0.0211878	4312/3162	2
	GO:0006778	porphyrin-containing compound metabolic process	2018-01-07	36/17381	0.0144113	0.048616	0.0213496	3162	1
	GO:2000142	regulation of DNA-templated transcription, initiation	2018-01-07	36/17381	0.0144113	0.048616	0.0213496	8061	1
	GO:0031076	embryonic camera-type eye development	2018-01-07	37/17381	0.014809	0.048616	0.0213496	5080	1
	GO:1904036	negative regulation of epithelial cell apoptotic process	2018-01-07	37/17381	0.014809	0.048616	0.0213496	3162	1
	GO:0002686	negative regulation of leukocyte migration	2018-01-07	38/17381	0.0152067	0.048616	0.0213496	3162	1
	GO:0007431	salivary gland development	2018-01-07	38/17381	0.0152067	0.048616	0.0213496	5080	1
	GO:0033003	regulation of mast cell activation	2018-01-07	38/17381	0.0152067	0.048616	0.0213496	3162	1
	GO:1902042	negative regulation of extrinsic apoptotic signaling pathway via death domain receptors	2018-01-07	38/17381	0.0152067	0.048616	0.0213496	3162	1
	GO:2000648	positive regulation of stem cell proliferation	2018-01-07	38/17381	0.0152067	0.048616	0.0213496	5080	1
	GO:0044089	positive regulation of cellular component biogenesis	2018-02-07	493/17381	0.0153396	0.048616	0.0213496	8061/4312	2
	GO:0050873	brown fat cell differentiation	2018-01-07	39/17381	0.0156041	0.048616	0.0213496	1051	1
	GO:0051653	spindle localization	2018-01-07	39/17381	0.0156041	0.048616	0.0213496	5080	1
	GO:1904705	regulation of vascular smooth muscle cell proliferation	2018-01-07	39/17381	0.0156041	0.048616	0.0213496	3162	1
	GO:1990874	vascular smooth muscle cell proliferation	2018-01-07	39/17381	0.0156041	0.048616	0.0213496	3162	1
	GO:0001709	cell fate determination	2018-01-07	40/17381	0.0160015	0.048616	0.0213496	5080	1
	GO:0021532	neural tube patterning	2018-01-07	40/17381	0.0160015	0.048616	0.0213496	5080	1
	GO:0031670	cellular response to nutrient	2018-01-07	40/17381	0.0160015	0.048616	0.0213496	3162	1
	GO:0042461	photoreceptor cell development	2018-01-07	40/17381	0.0160015	0.048616	0.0213496	5080	1
	GO:0032459	regulation of protein oligomerization	2018-01-07	41/17381	0.0163987	0.0495075	0.0217411	4312	1
Module 13	GO:0030198	extracellular matrix organization	2018-03-03	335/17381	7.09719e-06	0.000297438	7.22522e-05	1290/1300/6678	3
	GO:0043062	extracellular structure organization	2018-03-03	336/17381	7.16112e-06	0.000297438	7.22522e-05	1290/1300/6678	3
	GO:0001503	ossification	2018-03-03	373/17381	9.80565e-06	0.000297438	7.22522e-05	1290/1300/6678	3
	GO:0001501	skeletal system development	2018-03-03	491/17381	2.24098e-05	0.000509822	0.000123843	1290/1300/6678	3
	GO:0030574	collagen catabolic process	2018-02-03	68/17381	4.51315e-05	0.000821393	0.000199529	1290/1300	2
	GO:0044243	multicellular organismal catabolic process	2018-02-03	76/17381	5.64465e-05	0.000856105	0.000207961	1290/1300	2
	GO:0032963	collagen metabolic process	2018-02-03	125/17381	0.000153206	0.00188514	0.000457929	1290/1300	2
	GO:0044259	multicellular organismal macromolecule metabolic process	2018-02-03	130/17381	0.000165727	0.00188514	0.000457929	1290/1300	2
	GO:0044236	multicellular organism metabolic process	2018-02-03	151/17381	0.000223653	0.00226138	0.000549324	1290/1300	2
	GO:0060348	bone development	2018-02-03	185/17381	0.000335681	0.0030547	0.000742032	1300/6678	2
	GO:0001101	response to acid chemical	2018-02-03	324/17381	0.00102647	0.00849171	0.00206276	1290/6678	2
	GO:0009629	response to gravity	2018-01-03	10/17381	0.00172513	0.0130822	0.00317787	6678	1
	GO:0010288	response to lead ion	2018-01-03	19/17381	0.00327605	0.0229323	0.00557061	6678	1
	GO:0045992	negative regulation of embryonic development	2018-01-03	26/17381	0.00448121	0.0264656	0.00642889	1290	1
	GO:0001958	endochondral ossification	2018-01-03	27/17381	0.00465329	0.0264656	0.00642889	1300	1
	GO:0036075	replacement ossification	2018-01-03	27/17381	0.00465329	0.0264656	0.00642889	1300	1
	GO:0001937	negative regulation of endothelial cell proliferation	2018-01-03	40/17381	0.00688861	0.0360322	0.00875276	6678	1
	GO:0010470	regulation of gastrulation	2018-01-03	43/17381	0.00740398	0.0360322	0.00875276	1290	1
	GO:0030199	collagen fibril organization	2018-01-03	45/17381	0.00774745	0.0360322	0.00875276	1290	1
	GO:0035987	endodermal cell differentiation	2018-01-03	46/17381	0.00791916	0.0360322	0.00875276	1290	1
	GO:0060350	endochondral bone morphogenesis	2018-01-03	51/17381	0.00877742	0.0380355	0.00923938	1300	1
	GO:0001706	endoderm formation	2018-01-03	55/17381	0.00946366	0.0388003	0.00942517	1290	1
	GO:0046686	response to cadmium ion	2018-01-03	57/17381	0.00980666	0.0388003	0.00942517	6678	1
	GO:0071230	cellular response to amino acid stimulus	2018-01-03	62/17381	0.0106638	0.0404337	0.00982194	1290	1
	GO:0007492	endoderm development	2018-01-03	79/17381	0.0135745	0.0467661	0.0113602	1290	1
	GO:0010595	positive regulation of endothelial cell migration	2018-01-03	80/17381	0.0137455	0.0467661	0.0113602	6678	1
	GO:0060349	bone morphogenesis	2018-01-03	89/17381	0.015284	0.0467661	0.0113602	1300	1
	GO:0033273	response to vitamin	2018-01-03	91/17381	0.0156256	0.0467661	0.0113602	6678	1
	GO:0051591	response to cAMP	2018-01-03	96/17381	0.0164794	0.0467661	0.0113602	6678	1
	GO:0043473	pigmentation	2018-01-03	99/17381	0.0169915	0.0467661	0.0113602	6678	1
	GO:0043200	response to amino acid	2018-01-03	108/17381	0.0185265	0.0467661	0.0113602	1290	1
	GO:0016525	negative regulation of angiogenesis	2018-01-03	110/17381	0.0188674	0.0467661	0.0113602	6678	1
	GO:2000181	negative regulation of blood vessel morphogenesis	2018-01-03	112/17381	0.0192083	0.0467661	0.0113602	6678	1
	GO:0001936	regulation of endothelial cell proliferation	2018-01-03	113/17381	0.0193786	0.0467661	0.0113602	6678	1
	GO:0051592	response to calcium ion	2018-01-03	119/17381	0.0204005	0.0467661	0.0113602	6678	1
	GO:0010634	positive regulation of epithelial cell migration	2018-01-03	121/17381	0.020741	0.0467661	0.0113602	6678	1
	GO:1901343	negative regulation of vasculature development	2018-01-03	121/17381	0.020741	0.0467661	0.0113602	6678	1
	GO:0045995	regulation of embryonic development	2018-01-03	124/17381	0.0212516	0.0467661	0.0113602	1290	1
	GO:0001704	formation of primary germ layer	2018-01-03	126/17381	0.0215918	0.0467661	0.0113602	1290	1
	GO:0050680	negative regulation of epithelial cell proliferation	2018-01-03	127/17381	0.021762	0.0467661	0.0113602	6678	1
	GO:0002576	platelet degranulation	2018-01-03	128/17381	0.021932	0.0467661	0.0113602	6678	1
	GO:0001935	endothelial cell proliferation	2018-01-03	130/17381	0.0222722	0.0467661	0.0113602	6678	1
	GO:0046683	response to organophosphorus	2018-01-03	131/17381	0.0224422	0.0467661	0.0113602	6678	1
	GO:0045471	response to ethanol	2018-01-03	132/17381	0.0226122	0.0467661	0.0113602	6678	1
	GO:0010594	regulation of endothelial cell migration	2018-01-03	143/17381	0.024481	0.0476991	0.0115868	6678	1
	GO:0014074	response to purine-containing compound	2018-01-03	145/17381	0.0248205	0.0476991	0.0115868	6678	1
	GO:0048592	eye morphogenesis	2018-01-03	145/17381	0.0248205	0.0476991	0.0115868	1290	1
	GO:0051384	response to glucocorticoid	2018-01-03	147/17381	0.02516	0.0476991	0.0115868	6678	1
Module 14	GO:0001570	vasculogenesis	2018-04-20	75/17381	1.47014e-06	0.00193764	0.00105231	6608/947/8879/93649	4
	GO:0051090	regulation of DNA binding transcription factor activity	2018-06-20	391/17381	3.70098e-06	0.00243895	0.00132456	9575/28996/1540/6608/93649/5599	6
	GO:0051101	regulation of DNA binding	2018-04-20	112/17381	7.30989e-06	0.00321148	0.00174412	28996/6608/93649/5599	4
	GO:0072001	renal system development	2018-05-20	280/17381	1.33117e-05	0.0043862	0.00238209	6608/3611/947/8879/93649	5
	GO:0001655	urogenital system development	2018-05-20	316/17381	2.38407e-05	0.00536519	0.00291377	6608/3611/947/8879/93649	5
	GO:0051897	positive regulation of protein kinase B signaling	2018-04-20	152/17381	2.44242e-05	0.00536519	0.00291377	5294/2065/3611/2261	4
	GO:0051098	regulation of binding	2018-05-20	339/17381	3.33864e-05	0.00595707	0.00323521	28996/1540/6608/93649/5599	5
	GO:1904018	positive regulation of vasculature development	2018-04-20	168/17381	3.61582e-05	0.00595707	0.00323521	28996/947/93649/7494	4
	GO:1901215	negative regulation of neuron death	2018-04-20	186/17381	5.3798e-05	0.00787841	0.00427867	28996/2065/3611/947	4
	GO:0007517	muscle organ development	2018-05-20	389/17381	6.42977e-05	0.00847444	0.00460236	6608/2065/93649/1901/7494	5
	GO:0061042	vascular wound healing	2018-02-20	12/17381	8.24525e-05	0.00915184	0.00497025	947/7494	2
	GO:0051896	regulation of protein kinase B signaling	2018-04-20	211/17381	8.78006e-05	0.00915184	0.00497025	5294/2065/3611/2261	4
	GO:0031016	pancreas development	2018-03-20	77/17381	9.02685e-05	0.00915184	0.00497025	9575/6608/7494	3
	GO:0014812	muscle cell migration	2018-03-20	87/17381	0.000129844	0.0122238	0.00663862	6608/3611/93649	3
	GO:0001525	angiogenesis	2018-05-20	469/17381	0.000155214	0.0123058	0.0066831	28996/5294/947/1901/7494	5
	GO:0043491	protein kinase B signaling	2018-04-20	245/17381	0.000156258	0.0123058	0.0066831	5294/2065/3611/2261	4
	GO:0051091	positive regulation of DNA binding transcription factor activity	2018-04-20	246/17381	0.000158724	0.0123058	0.0066831	9575/28996/6608/93649	4
	GO:0010832	negative regulation of myotube differentiation	2018-02-20	17/17381	0.000169317	0.0123977	0.00673306	93649/7494	2
	GO:0046854	phosphatidylinositol phosphorylation	2018-03-20	99/17381	0.000190455	0.0127365	0.00691703	5294/2065/2261	3
	GO:0090100	positive regulation of transmembrane receptor protein serine/threonine kinase signaling pathway	2018-03-20	100/17381	0.000196202	0.0127365	0.00691703	28996/3611/93649	3
	GO:0001822	kidney development	2018-04-20	264/17381	0.000208095	0.0127365	0.00691703	6608/3611/947/8879	4
	GO:0003323	type B pancreatic cell development	2018-02-20	19/17381	0.000212597	0.0127365	0.00691703	9575/6608	2
	GO:0014902	myotube differentiation	2018-03-20	109/17381	0.000253051	0.0135338	0.00735006	6608/93649/7494	3
	GO:0072009	nephron epithelium development	2018-03-20	109/17381	0.000253051	0.0135338	0.00735006	6608/3611/947	3
	GO:1901214	regulation of neuron death	2018-04-20	280/17381	0.000260558	0.0135338	0.00735006	28996/2065/3611/947	4
	GO:0046834	lipid phosphorylation	2018-03-20	111/17381	0.00026698	0.0135338	0.00735006	5294/2065/2261	3
	GO:0060055	angiogenesis involved in wound healing	2018-02-20	22/17381	0.000286599	0.0139903	0.00759793	947/7494	2
	GO:0002068	glandular epithelial cell development	2018-02-20	24/17381	0.000341957	0.0146663	0.0079651	9575/6608	2
	GO:1901342	regulation of vasculature development	2018-04-20	307/17381	0.000369803	0.0146663	0.0079651	28996/947/93649/7494	4
	GO:0003309	type B pancreatic cell differentiation	2018-02-20	25/17381	0.000371436	0.0146663	0.0079651	9575/6608	2
	GO:0030511	positive regulation of transforming growth factor beta receptor signaling pathway	2018-02-20	25/17381	0.000371436	0.0146663	0.0079651	28996/93649	2
	GO:0072202	cell differentiation involved in metanephros development	2018-02-20	25/17381	0.000371436	0.0146663	0.0079651	6608/947	2
	GO:1903846	positive regulation of cellular response to transforming growth factor beta stimulus	2018-02-20	25/17381	0.000371436	0.0146663	0.0079651	28996/93649	2
	GO:0048638	regulation of developmental growth	2018-04-20	310/17381	0.000383691	0.0146663	0.0079651	6608/3611/8879/2261	4
	GO:0045577	regulation of B cell differentiation	2018-02-20	26/17381	0.000402112	0.0146663	0.0079651	1540/7494	2
	GO:0070997	neuron death	2018-04-20	316/17381	0.000412586	0.0146663	0.0079651	28996/2065/3611/947	4
	GO:0048660	regulation of smooth muscle cell proliferation	2018-03-20	130/17381	0.000424645	0.0146663	0.0079651	3611/93649/1901	3
	GO:0035883	enteroendocrine cell differentiation	2018-02-20	27/17381	0.000433981	0.0146663	0.0079651	9575/6608	2
	GO:0042634	regulation of hair cycle	2018-02-20	27/17381	0.000433981	0.0146663	0.0079651	9575/6608	2
	GO:0048659	smooth muscle cell proliferation	2018-03-20	133/17381	0.000453967	0.0149582	0.00812362	3611/93649/1901	3
	GO:0014912	negative regulation of smooth muscle cell migration	2018-02-20	28/17381	0.000467042	0.0150137	0.00815374	3611/93649	2
	GO:0043524	negative regulation of neuron apoptotic process	2018-03-20	137/17381	0.000495047	0.0154701	0.00840161	28996/2065/3611	3
	GO:0072006	nephron development	2018-03-20	138/17381	0.000505677	0.0154701	0.00840161	6608/3611/947	3
	GO:0072073	kidney epithelium development	2018-03-20	139/17381	0.000516452	0.0154701	0.00840161	6608/3611/947	3
	GO:0055123	digestive system development	2018-03-20	143/17381	0.000561028	0.0164319	0.00892396	6608/93649/7494	3
	GO:0007596	blood coagulation	2018-04-20	348/17381	0.000593681	0.0166646	0.00905036	23186/5294/3611/947	4
	GO:0045766	positive regulation of angiogenesis	2018-03-20	147/17381	0.000608002	0.0166646	0.00905036	28996/947/7494	3
	GO:0010667	negative regulation of cardiac muscle cell apoptotic process	2018-02-20	32/17381	0.000611149	0.0166646	0.00905036	3611/93649	2
	GO:0007599	hemostasis	2018-04-20	353/17381	0.000626372	0.0166646	0.00905036	23186/5294/3611/947	4
	GO:0050817	coagulation	2018-04-20	354/17381	0.000633062	0.0166646	0.00905036	23186/5294/3611/947	4
	GO:0071695	anatomical structure maturation	2018-03-20	150/17381	0.000644838	0.0166646	0.00905036	1901/2261/7494	3
	GO:0014037	Schwann cell differentiation	2018-02-20	34/17381	0.000690286	0.0174961	0.00950191	2065/3611	2
	GO:0010664	negative regulation of striated muscle cell apoptotic process	2018-02-20	35/17381	0.000731617	0.0180524	0.00980401	3611/93649	2
	GO:0014706	striated muscle tissue development	2018-04-20	369/17381	0.000739626	0.0180524	0.00980401	6608/2065/93649/1901	4
	GO:0001503	ossification	2018-04-20	373/17381	0.000770071	0.0184537	0.010022	6608/3611/1901/2261	4
	GO:0051154	negative regulation of striated muscle cell differentiation	2018-02-20	37/17381	0.00081779	0.0192473	0.010453	93649/7494	2
	GO:0060537	muscle tissue development	2018-04-20	387/17381	0.000883663	0.020361	0.0110578	6608/2065/93649/1901	4
	GO:0035265	organ growth	2018-03-20	168/17381	0.000896007	0.020361	0.0110578	6608/1901/2261	3
	GO:0042692	muscle cell differentiation	2018-04-20	403/17381	0.0010275	0.0229532	0.0124656	6608/3611/93649/7494	4
	GO:0072210	metanephric nephron development	2018-02-20	42/17381	0.00105359	0.0231439	0.0125692	6608/947	2
	GO:0010761	fibroblast migration	2018-02-20	43/17381	0.00110423	0.0238585	0.0129573	3611/8879	2
	GO:0035850	epithelial cell differentiation involved in kidney development	2018-02-20	44/17381	0.00115601	0.0245746	0.0133461	6608/947	2
	GO:0031018	endocrine pancreas development	2018-02-20	45/17381	0.00120895	0.0248713	0.0135073	9575/6608	2
	GO:0010001	glial cell differentiation	2018-03-20	187/17381	0.00122082	0.0248713	0.0135073	6608/2065/3611	3
	GO:0010665	regulation of cardiac muscle cell apoptotic process	2018-02-20	46/17381	0.00126303	0.0248713	0.0135073	3611/93649	2
	GO:0002067	glandular epithelial cell differentiation	2018-02-20	47/17381	0.00131825	0.0248713	0.0135073	9575/6608	2
	GO:0010656	negative regulation of muscle cell apoptotic process	2018-02-20	47/17381	0.00131825	0.0248713	0.0135073	3611/93649	2
	GO:0010662	regulation of striated muscle cell apoptotic process	2018-02-20	48/17381	0.00137462	0.0248713	0.0135073	3611/93649	2
	GO:0048662	negative regulation of smooth muscle cell proliferation	2018-02-20	48/17381	0.00137462	0.0248713	0.0135073	3611/93649	2
	GO:0043523	regulation of neuron apoptotic process	2018-03-20	195/17381	0.00137712	0.0248713	0.0135073	28996/2065/3611	3
	GO:0002064	epithelial cell development	2018-03-20	196/17381	0.0013975	0.0248713	0.0135073	9575/6608/7494	3
	GO:0051147	regulation of muscle cell differentiation	2018-03-20	197/17381	0.00141807	0.0248713	0.0135073	3611/93649/7494	3
	GO:0010659	cardiac muscle cell apoptotic process	2018-02-20	49/17381	0.00143213	0.0248713	0.0135073	3611/93649	2
	GO:0072678	T cell migration	2018-02-20	49/17381	0.00143213	0.0248713	0.0135073	5294/1901	2
	GO:0033002	muscle cell proliferation	2018-03-20	199/17381	0.00145978	0.0248713	0.0135073	3611/93649/1901	3
	GO:0016570	histone modification	2018-04-20	444/17381	0.00147057	0.0248713	0.0135073	9575/23186/93649/5599	4
	GO:0036092	phosphatidylinositol-3-phosphate biosynthetic process	2018-02-20	50/17381	0.00149077	0.0248713	0.0135073	5294/2261	2
	GO:0045661	regulation of myoblast differentiation	2018-02-20	50/17381	0.00149077	0.0248713	0.0135073	3611/93649	2
	GO:0048008	platelet-derived growth factor receptor signaling pathway	2018-02-20	50/17381	0.00149077	0.0248713	0.0135073	8879/93649	2
	GO:0043393	regulation of protein binding	2018-03-20	202/17381	0.00152379	0.0251045	0.0136339	28996/1540/5599	3
	GO:0010658	striated muscle cell apoptotic process	2018-02-20	51/17381	0.00155055	0.0252299	0.0137021	3611/93649	2
	GO:0001894	tissue homeostasis	2018-03-20	208/17381	0.00165706	0.0266342	0.0144647	6608/947/1901	3
	GO:0002066	columnar/cuboidal epithelial cell development	2018-02-20	54/17381	0.00173667	0.0269286	0.0146246	9575/6608	2
	GO:0043388	positive regulation of DNA binding	2018-02-20	54/17381	0.00173667	0.0269286	0.0146246	28996/93649	2
	GO:0061005	cell differentiation involved in kidney development	2018-02-20	54/17381	0.00173667	0.0269286	0.0146246	6608/947	2
	GO:0031668	cellular response to extracellular stimulus	2018-03-20	215/17381	0.00182155	0.0274471	0.0149062	93649/5599/7494	3
	GO:0048738	cardiac muscle tissue development	2018-03-20	215/17381	0.00182155	0.0274471	0.0149062	2065/93649/1901	3
	GO:0090092	regulation of transmembrane receptor protein serine/threonine kinase signaling pathway	2018-03-20	216/17381	0.00184585	0.0274471	0.0149062	28996/3611/93649	3
	GO:0070527	platelet aggregation	2018-02-20	56/17381	0.00186638	0.0274471	0.0149062	5294/3611	2
	GO:0046488	phosphatidylinositol metabolic process	2018-03-20	218/17381	0.00189506	0.0274471	0.0149062	5294/2065/2261	3
	GO:0097191	extrinsic apoptotic signaling pathway	2018-03-20	218/17381	0.00189506	0.0274471	0.0149062	1540/2065/2261	3
	GO:0055025	positive regulation of cardiac muscle tissue development	2018-02-20	57/17381	0.00193291	0.0276911	0.0150387	2065/93649	2
	GO:0051402	neuron apoptotic process	2018-03-20	221/17381	0.00197041	0.0279247	0.0151656	28996/2065/3611	3
	GO:0001658	branching involved in ureteric bud morphogenesis	2018-02-20	59/17381	0.00206934	0.0290147	0.0157575	6608/3611	2
	GO:0010830	regulation of myotube differentiation	2018-02-20	62/17381	0.00228231	0.0311226	0.0169023	93649/7494	2
	GO:0071230	cellular response to amino acid stimulus	2018-02-20	62/17381	0.00228231	0.0311226	0.0169023	22849/7494	2
	GO:0048872	homeostasis of number of cells	2018-03-20	233/17381	0.00229051	0.0311226	0.0169023	28996/1540/6608	3
	GO:0003007	heart morphogenesis	2018-03-20	235/17381	0.00234682	0.0315623	0.0171411	6608/3611/1901	3
	GO:0061448	connective tissue development	2018-03-20	237/17381	0.00240398	0.0320045	0.0173813	947/2261/7494	3
	GO:0060675	ureteric bud morphogenesis	2018-02-20	64/17381	0.00242983	0.0320251	0.0173925	6608/3611	2
	GO:0072171	mesonephric tubule morphogenesis	2018-02-20	65/17381	0.00250524	0.0326921	0.0177547	6608/3611	2
	GO:0014910	regulation of smooth muscle cell migration	2018-02-20	67/17381	0.00265936	0.0340294	0.018481	3611/93649	2
	GO:0040014	regulation of multicellular organism growth	2018-02-20	67/17381	0.00265936	0.0340294	0.018481	6608/8879	2
	GO:1900006	positive regulation of dendrite development	2018-02-20	68/17381	0.00273806	0.0346996	0.0188449	22849/3611	2
	GO:2000027	regulation of organ morphogenesis	2018-03-20	250/17381	0.00279676	0.035106	0.0190656	6608/947/7494	3
	GO:0090287	regulation of cellular response to growth factor stimulus	2018-03-20	253/17381	0.0028927	0.0356974	0.0193868	28996/3611/93649	3
	GO:0010660	regulation of muscle cell apoptotic process	2018-02-20	70/17381	0.00289873	0.0356974	0.0193868	3611/93649	2
	GO:0042063	gliogenesis	2018-03-20	254/17381	0.00292513	0.0356974	0.0193868	6608/2065/3611	3
	GO:0007422	peripheral nervous system development	2018-02-20	71/17381	0.0029807	0.0358336	0.0194608	2065/3611	2
	GO:0021700	developmental maturation	2018-03-20	256/17381	0.00299066	0.0358336	0.0194608	1901/2261/7494	3
	GO:0021675	nerve development	2018-02-20	73/17381	0.00314788	0.036716	0.01994	2065/3611	2
	GO:0051148	negative regulation of muscle cell differentiation	2018-02-20	73/17381	0.00314788	0.036716	0.01994	93649/7494	2
	GO:0072078	nephron tubule morphogenesis	2018-02-20	73/17381	0.00314788	0.036716	0.01994	6608/3611	2
	GO:0010657	muscle cell apoptotic process	2018-02-20	74/17381	0.0032331	0.0370541	0.0201236	3611/93649	2
	GO:0045582	positive regulation of T cell differentiation	2018-02-20	74/17381	0.0032331	0.0370541	0.0201236	1540/7494	2
	GO:0034109	homotypic cell-cell adhesion	2018-02-20	75/17381	0.00331939	0.0373928	0.0203076	5294/3611	2
	GO:0072088	nephron epithelium morphogenesis	2018-02-20	75/17381	0.00331939	0.0373928	0.0203076	6608/3611	2
	GO:0014909	smooth muscle cell migration	2018-02-20	76/17381	0.00340676	0.0380517	0.0206654	3611/93649	2
	GO:0051146	striated muscle cell differentiation	2018-03-20	270/17381	0.00347494	0.0380716	0.0206762	6608/93649/7494	3
	GO:0061333	renal tubule morphogenesis	2018-02-20	77/17381	0.0034952	0.0380716	0.0206762	6608/3611	2
	GO:0072028	nephron morphogenesis	2018-02-20	77/17381	0.0034952	0.0380716	0.0206762	6608/3611	2
	GO:0045765	regulation of angiogenesis	2018-03-20	273/17381	0.00358462	0.0384117	0.0208609	28996/947/7494	3
	GO:2000177	regulation of neural precursor cell proliferation	2018-02-20	78/17381	0.00358471	0.0384117	0.0208609	6608/3611	2
	GO:0030258	lipid modification	2018-03-20	275/17381	0.0036589	0.0388906	0.021121	5294/2065/2261	3
	GO:0045844	positive regulation of striated muscle tissue development	2018-02-20	81/17381	0.00385964	0.0403437	0.0219102	2065/93649	2
	GO:0048636	positive regulation of muscle organ development	2018-02-20	81/17381	0.00385964	0.0403437	0.0219102	2065/93649	2
	GO:0032103	positive regulation of response to external stimulus	2018-03-20	281/17381	0.00388744	0.0403437	0.0219102	9575/5294/1901	3
	GO:1901863	positive regulation of muscle tissue development	2018-02-20	82/17381	0.0039534	0.0407077	0.0221079	2065/93649	2
	GO:0045445	myoblast differentiation	2018-02-20	83/17381	0.00404823	0.041361	0.0224627	3611/93649	2
	GO:0071496	cellular response to external stimulus	2018-03-20	288/17381	0.00416493	0.042226	0.0229324	93649/5599/7494	3
	GO:0018105	peptidyl-serine phosphorylation	2018-03-20	289/17381	0.00420553	0.0423122	0.0229792	28996/3611/5599	3
	GO:0045621	positive regulation of lymphocyte differentiation	2018-02-20	85/17381	0.00424105	0.0423463	0.0229977	1540/7494	2
	GO:0097193	intrinsic apoptotic signaling pathway	2018-03-20	292/17381	0.0043288	0.0426366	0.0231554	28996/1540/7494	3
	GO:0016575	histone deacetylation	2018-02-20	86/17381	0.00433905	0.0426366	0.0231554	23186/5599	2
	GO:0001656	metanephros development	2018-02-20	87/17381	0.00443809	0.0426366	0.0231554	6608/947	2
	GO:0021782	glial cell development	2018-02-20	87/17381	0.00443809	0.0426366	0.0231554	6608/3611	2
	GO:0030510	regulation of BMP signaling pathway	2018-02-20	87/17381	0.00443809	0.0426366	0.0231554	28996/3611	2
	GO:0071214	cellular response to abiotic stimulus	2018-03-20	296/17381	0.00449658	0.0426366	0.0231554	9575/9683/5599	3
	GO:0104004	cellular response to environmental stimulus	2018-03-20	296/17381	0.00449658	0.0426366	0.0231554	9575/9683/5599	3
	GO:0009416	response to light stimulus	2018-03-20	299/17381	0.00462498	0.0435409	0.0236465	9575/9683/5599	3
	GO:0055024	regulation of cardiac muscle tissue development	2018-02-20	90/17381	0.00474148	0.0443211	0.0240702	2065/93649	2
	GO:0060993	kidney morphogenesis	2018-02-20	92/17381	0.00494895	0.0452966	0.0246	6608/3611	2
	GO:0072080	nephron tubule development	2018-02-20	92/17381	0.00494895	0.0452966	0.0246	6608/3611	2
	GO:0072676	lymphocyte migration	2018-02-20	92/17381	0.00494895	0.0452966	0.0246	5294/1901	2
	GO:0018209	peptidyl-serine modification	2018-03-20	308/17381	0.00502357	0.0456625	0.0247987	28996/3611/5599	3
	GO:0061326	renal tubule development	2018-02-20	94/17381	0.00516056	0.0465865	0.0253005	6608/3611	2
	GO:0048511	rhythmic process	2018-03-20	316/17381	0.0053949	0.0483706	0.0262695	9575/8879/5599	3
	GO:0001657	ureteric bud development	2018-02-20	97/17381	0.00548571	0.0488525	0.0265312	6608/3611	2
	GO:0072163	mesonephric epithelium development	2018-02-20	98/17381	0.00559615	0.0491675	0.0267022	6608/3611	2
	GO:0072164	mesonephric tubule development	2018-02-20	98/17381	0.00559615	0.0491675	0.0267022	6608/3611	2
	GO:0007178	transmembrane receptor protein serine/threonine kinase signaling pathway	2018-03-20	322/17381	0.00568405	0.0491675	0.0267022	28996/3611/93649	3
	GO:0006476	protein deacetylation	2018-02-20	99/17381	0.00570761	0.0491675	0.0267022	23186/5599	2
	GO:0030282	bone mineralization	2018-02-20	99/17381	0.00570761	0.0491675	0.0267022	1901/2261	2
Module 15	GO:0052547	regulation of peptidase activity	2018-05-08	426/17381	4.55324e-07	0.000255707	0.000120532	9994/5054/857/5978/841	5
	GO:0010952	positive regulation of peptidase activity	2018-04-08	173/17381	6.43288e-07	0.000255707	0.000120532	9994/857/5978/841	4
	GO:0097191	extrinsic apoptotic signaling pathway	2018-04-08	218/17381	1.62019e-06	0.000429352	0.000202382	9994/5054/857/841	4
	GO:0071260	cellular response to mechanical stimulus	2018-03-08	78/17381	4.79071e-06	0.000574361	0.000270735	9994/10746/841	3
	GO:0071496	cellular response to external stimulus	2018-04-08	288/17381	4.90443e-06	0.000574361	0.000270735	9994/4929/10746/841	4
	GO:0071214	cellular response to abiotic stimulus	2018-04-08	296/17381	5.46745e-06	0.000574361	0.000270735	9994/10746/5978/841	4
	GO:0104004	cellular response to environmental stimulus	2018-04-08	296/17381	5.46745e-06	0.000574361	0.000270735	9994/10746/5978/841	4
	GO:0008625	extrinsic apoptotic signaling pathway via death domain receptors	2018-03-08	83/17381	5.77974e-06	0.000574361	0.000270735	9994/5054/841	3
	GO:2001233	regulation of apoptotic signaling pathway	2018-04-08	383/17381	1.51486e-05	0.00117932	0.000555891	4929/5054/857/841	4
	GO:0045862	positive regulation of proteolysis	2018-04-08	393/17381	1.67691e-05	0.00117932	0.000555891	9994/857/5978/841	4
	GO:0043280	positive regulation of cysteine-type endopeptidase activity involved in apoptotic process	2018-03-08	120/17381	1.75252e-05	0.00117932	0.000555891	9994/5978/841	3
	GO:0052548	regulation of endopeptidase activity	2018-04-08	399/17381	1.7801e-05	0.00117932	0.000555891	9994/5054/5978/841	4
	GO:2001056	positive regulation of cysteine-type endopeptidase activity	2018-03-08	130/17381	2.22769e-05	0.00136232	0.000642152	9994/5978/841	3
	GO:0034138	toll-like receptor 3 signaling pathway	2018-02-08	20/17381	3.50766e-05	0.00179705	0.000847068	857/841	2
	GO:0060544	regulation of necroptotic process	2018-02-08	20/17381	3.50766e-05	0.00179705	0.000847068	857/841	2
	GO:2001236	regulation of extrinsic apoptotic signaling pathway	2018-03-08	154/17381	3.6975e-05	0.00179705	0.000847068	5054/857/841	3
	GO:0010950	positive regulation of endopeptidase activity	2018-03-08	156/17381	3.84274e-05	0.00179705	0.000847068	9994/5978/841	3
	GO:0010939	regulation of necrotic cell death	2018-02-08	30/17381	8.01222e-05	0.00353873	0.00166804	857/841	2
	GO:0043281	regulation of cysteine-type endopeptidase activity involved in apoptotic process	2018-03-08	207/17381	8.92172e-05	0.003575	0.00168514	9994/5978/841	3
	GO:0009612	response to mechanical stimulus	2018-03-08	210/17381	9.31114e-05	0.003575	0.00168514	9994/10746/841	3
	GO:2001234	negative regulation of apoptotic signaling pathway	2018-03-08	211/17381	9.44339e-05	0.003575	0.00168514	4929/5054/841	3
	GO:0070266	necroptotic process	2018-02-08	37/17381	0.000122472	0.00435985	0.00205509	857/841	2
	GO:1902042	negative regulation of extrinsic apoptotic signaling pathway via death domain receptors	2018-02-08	38/17381	0.000129247	0.00435985	0.00205509	5054/841	2
	GO:2000116	regulation of cysteine-type endopeptidase activity	2018-03-08	236/17381	0.000131618	0.00435985	0.00205509	9994/5978/841	3
	GO:0097300	programmed necrotic cell death	2018-02-08	42/17381	0.000158149	0.00502914	0.00237057	857/841	2
	GO:0031638	zymogen activation	2018-02-08	43/17381	0.000165825	0.00507043	0.00239004	5054/841	2
	GO:0070265	necrotic cell death	2018-02-08	52/17381	0.000243	0.00715501	0.00337264	857/841	2
	GO:1902041	regulation of extrinsic apoptotic signaling pathway via death domain receptors	2018-02-08	59/17381	0.000313049	0.00888837	0.00418968	5054/841	2
	GO:0048545	response to steroid hormone	2018-03-08	394/17381	0.000594758	0.0160168	0.0075498	4929/857/5978	3
	GO:0006919	activation of cysteine-type endopeptidase activity involved in apoptotic process	2018-02-08	82/17381	0.000604408	0.0160168	0.0075498	9994/841	2
	GO:0030193	regulation of blood coagulation	2018-02-08	85/17381	0.000649276	0.0161305	0.00760336	5054/857	2
	GO:1900046	regulation of hemostasis	2018-02-08	85/17381	0.000649276	0.0161305	0.00760336	5054/857	2
	GO:0050818	regulation of coagulation	2018-02-08	91/17381	0.000743729	0.0179171	0.00844553	5054/857	2
	GO:0031349	positive regulation of defense response	2018-03-08	451/17381	0.000881835	0.0206194	0.00971929	5054/857/841	3
	GO:2001237	negative regulation of extrinsic apoptotic signaling pathway	2018-02-08	103/17381	0.000951408	0.0208384	0.00982255	5054/841	2
	GO:0060627	regulation of vesicle-mediated transport	2018-03-08	465/17381	0.000963768	0.0208384	0.00982255	5054/857/5978	3
	GO:0051817	modification of morphology or physiology of other organism involved in symbiotic interaction	2018-02-08	104/17381	0.000969839	0.0208384	0.00982255	5978/841	2
	GO:0002224	toll-like receptor signaling pathway	2018-02-08	135/17381	0.00162616	0.034021	0.0160364	857/841	2
	GO:0061041	regulation of wound healing	2018-02-08	143/17381	0.001822	0.0371407	0.0175069	5054/857	2
	GO:0035821	modification of morphology or physiology of other organism	2018-02-08	147/17381	0.00192395	0.0382385	0.0180243	5978/841	2
	GO:0001959	regulation of cytokine-mediated signaling pathway	2018-02-08	165/17381	0.00241572	0.0462732	0.0218117	857/841	2
	GO:0010565	regulation of cellular ketone metabolic process	2018-02-08	166/17381	0.00244462	0.0462732	0.0218117	857/5978	2
	GO:1903034	regulation of response to wounding	2018-02-08	168/17381	0.00250291	0.0462747	0.0218124	5054/857	2
	GO:0060759	regulation of response to cytokine stimulus	2018-02-08	173/17381	0.00265151	0.0479079	0.0225822	857/841	2
	GO:2001235	positive regulation of apoptotic signaling pathway	2018-02-08	177/17381	0.00277334	0.0489957	0.0230949	857/841	2
Module 16	GO:0042447	hormone catabolic process	2018-01-04	10/17381	0.00229958	0.0432709	0.0174385	1588	1
	GO:0044557	relaxation of smooth muscle	2018-01-04	10/17381	0.00229958	0.0432709	0.0174385	5997	1
	GO:0002676	regulation of chronic inflammatory response	2018-01-04	11/17381	0.00252932	0.0432709	0.0174385	1588	1
	GO:0060736	prostate gland growth	2018-01-04	11/17381	0.00252932	0.0432709	0.0174385	1588	1
	GO:0006703	estrogen biosynthetic process	2018-01-04	13/17381	0.00298868	0.0432709	0.0174385	1588	1
	GO:0060452	positive regulation of cardiac muscle contraction	2018-01-04	13/17381	0.00298868	0.0432709	0.0174385	5997	1
	GO:0002689	negative regulation of leukocyte chemotaxis	2018-01-04	16/17381	0.00367742	0.0432709	0.0174385	1588	1
	GO:0045986	negative regulation of smooth muscle contraction	2018-01-04	16/17381	0.00367742	0.0432709	0.0174385	5997	1
	GO:0045989	positive regulation of striated muscle contraction	2018-01-04	16/17381	0.00367742	0.0432709	0.0174385	5997	1
	GO:0060192	negative regulation of lipase activity	2018-01-04	16/17381	0.00367742	0.0432709	0.0174385	5997	1
	GO:0055119	relaxation of cardiac muscle	2018-01-04	17/17381	0.00390692	0.0432709	0.0174385	5997	1
	GO:0030540	female genitalia development	2018-01-04	18/17381	0.00413638	0.0432709	0.0174385	1588	1
	GO:0010817	regulation of hormone levels	2018-02-04	486/17381	0.00450968	0.0432709	0.0174385	1588/886	2
	GO:0060065	uterus development	2018-01-04	20/17381	0.00459518	0.0432709	0.0174385	1588	1
	GO:0002544	chronic inflammatory response	2018-01-04	22/17381	0.00505383	0.0432709	0.0174385	1588	1
	GO:0010758	regulation of macrophage chemotaxis	2018-01-04	22/17381	0.00505383	0.0432709	0.0174385	1588	1
	GO:0031116	positive regulation of microtubule polymerization	2018-01-04	22/17381	0.00505383	0.0432709	0.0174385	5997	1
	GO:0043949	regulation of cAMP-mediated signaling	2018-01-04	22/17381	0.00505383	0.0432709	0.0174385	5997	1
	GO:0008210	estrogen metabolic process	2018-01-04	25/17381	0.0057415	0.0432709	0.0174385	1588	1
	GO:0031112	positive regulation of microtubule polymerization or depolymerization	2018-01-04	25/17381	0.0057415	0.0432709	0.0174385	5997	1
	GO:0045932	negative regulation of muscle contraction	2018-01-04	25/17381	0.0057415	0.0432709	0.0174385	5997	1
	GO:0071875	adrenergic receptor signaling pathway	2018-01-04	26/17381	0.00597065	0.0432709	0.0174385	5997	1
	GO:1905521	regulation of macrophage migration	2018-01-04	26/17381	0.00597065	0.0432709	0.0174385	1588	1
	GO:0006706	steroid catabolic process	2018-01-04	27/17381	0.00619975	0.0432709	0.0174385	1588	1
	GO:0008209	androgen metabolic process	2018-01-04	28/17381	0.00642882	0.0432709	0.0174385	1588	1
	GO:0010614	negative regulation of cardiac muscle hypertrophy	2018-01-04	28/17381	0.00642882	0.0432709	0.0174385	5997	1
	GO:0014741	negative regulation of muscle hypertrophy	2018-01-04	30/17381	0.00688683	0.044179	0.0178045	5997	1
	GO:0090075	relaxation of muscle	2018-01-04	32/17381	0.00734468	0.044179	0.0178045	5997	1
	GO:0042311	vasodilation	2018-01-04	33/17381	0.00757355	0.044179	0.0178045	5997	1
	GO:0048246	macrophage chemotaxis	2018-01-04	33/17381	0.00757355	0.044179	0.0178045	1588	1
	GO:0045823	positive regulation of heart contraction	2018-01-04	36/17381	0.00825992	0.0445983	0.0179735	5997	1
	GO:0002686	negative regulation of leukocyte migration	2018-01-04	38/17381	0.00871729	0.0445983	0.0179735	1588	1
	GO:0031113	regulation of microtubule polymerization	2018-01-04	38/17381	0.00871729	0.0445983	0.0179735	5997	1
	GO:0050873	brown fat cell differentiation	2018-01-04	39/17381	0.00894592	0.0445983	0.0179735	5997	1
	GO:1905517	macrophage migration	2018-01-04	39/17381	0.00894592	0.0445983	0.0179735	1588	1
	GO:0042181	ketone biosynthetic process	2018-01-04	40/17381	0.00917451	0.0445983	0.0179735	1588	1
	GO:0050922	negative regulation of chemotaxis	2018-01-04	42/17381	0.00963158	0.0454081	0.0182998	1588	1
	GO:0045744	negative regulation of G-protein coupled receptor protein signaling pathway	2018-01-04	43/17381	0.00986005	0.0454081	0.0182998	5997	1
	GO:0048806	genitalia development	2018-01-04	47/17381	0.0107735	0.0479331	0.0193174	1588	1
	GO:0030850	prostate gland development	2018-01-04	48/17381	0.0110018	0.0479331	0.0193174	1588	1
	GO:0045933	positive regulation of muscle contraction	2018-01-04	49/17381	0.01123	0.0479331	0.0193174	5997	1
Module 17	GO:0043405	regulation of MAP kinase activity	2018-06-16	337/17381	3.45453e-07	0.000460144	0.000255272	7852/5606/7786/10114/1647/7040	6
	GO:0043406	positive regulation of MAP kinase activity	2018-05-16	263/17381	2.91034e-06	0.00144355	0.000800832	7852/5606/7786/1647/7040	5
	GO:0071900	regulation of protein serine/threonine kinase activity	2018-06-16	495/17381	3.25124e-06	0.00144355	0.000800832	7852/5606/7786/10114/1647/7040	6
	GO:0010212	response to ionizing radiation	2018-04-16	149/17381	8.71323e-06	0.00252647	0.0014016	3383/8626/1647/7040	4
	GO:0001974	blood vessel remodeling	2018-03-16	46/17381	9.48374e-06	0.00252647	0.0014016	2034/4846/7040	3
	GO:0071902	positive regulation of protein serine/threonine kinase activity	2018-05-16	350/17381	1.17087e-05	0.00259933	0.00144202	7852/5606/7786/1647/7040	5
	GO:0051926	negative regulation of calcium ion transport	2018-03-16	65/17381	2.69996e-05	0.00513764	0.00285018	3383/4846/7040	3
	GO:0072593	reactive oxygen species metabolic process	2018-04-16	251/17381	6.74107e-05	0.0112239	0.00622662	3383/4846/1647/7040	4
	GO:2000379	positive regulation of reactive oxygen species metabolic process	2018-03-16	92/17381	7.64558e-05	0.0113155	0.00627742	3383/1647/7040	3
	GO:0018105	peptidyl-serine phosphorylation	2018-04-16	289/17381	0.000116365	0.0140908	0.00781708	3589/7786/10114/7040	4
	GO:0031098	stress-activated protein kinase signaling cascade	2018-04-16	289/17381	0.000116365	0.0140908	0.00781708	5606/7786/10114/1647	4
	GO:0018209	peptidyl-serine modification	2018-04-16	308/17381	0.000148732	0.0145303	0.00806091	3589/7786/10114/7040	4
	GO:0018107	peptidyl-threonine phosphorylation	2018-03-16	117/17381	0.000156164	0.0145303	0.00806091	7786/10114/7040	3
	GO:0046660	female sex differentiation	2018-03-16	117/17381	0.000156164	0.0145303	0.00806091	3383/4846/8626	3
	GO:0048485	sympathetic nervous system development	2018-02-16	21/17381	0.000165148	0.0145303	0.00806091	8626/8828	2
	GO:0032147	activation of protein kinase activity	2018-04-16	325/17381	0.000182839	0.0145303	0.00806091	7852/5606/7786/1647	4
	GO:0018210	peptidyl-threonine modification	2018-03-16	124/17381	0.000185447	0.0145303	0.00806091	7786/10114/7040	3
	GO:0001666	response to hypoxia	2018-04-16	341/17381	0.000219817	0.0162665	0.00902406	7852/3383/2034/7040	4
	GO:0036293	response to decreased oxygen levels	2018-04-16	349/17381	0.000240207	0.0168398	0.00934213	7852/3383/2034/7040	4
	GO:0043271	negative regulation of ion transport	2018-03-16	141/17381	0.000270861	0.0180394	0.0100076	3383/4846/7040	3
	GO:0070482	response to oxygen levels	2018-04-16	371/17381	0.000303319	0.0188618	0.0104639	7852/3383/2034/7040	4
	GO:0018108	peptidyl-tyrosine phosphorylation	2018-04-16	375/17381	0.000315963	0.0188618	0.0104639	3383/3589/5606/7040	4
	GO:0018212	peptidyl-tyrosine modification	2018-04-16	378/17381	0.000325692	0.0188618	0.0104639	3383/3589/5606/7040	4
	GO:0007093	mitotic cell cycle checkpoint	2018-03-16	161/17381	0.000399804	0.0192029	0.0106531	8626/1647/7040	3
	GO:0003018	vascular process in circulatory system	2018-03-16	162/17381	0.000407119	0.0192029	0.0106531	3383/4846/7040	3
	GO:0071312	cellular response to alkaloid	2018-02-16	33/17381	0.000412564	0.0192029	0.0106531	3383/840	2
	GO:0071222	cellular response to lipopolysaccharide	2018-03-16	165/17381	0.00042958	0.0192029	0.0106531	3383/4846/7040	3
	GO:0048771	tissue remodeling	2018-03-16	166/17381	0.00043724	0.0192029	0.0106531	2034/4846/7040	3
	GO:0071478	cellular response to radiation	2018-03-16	167/17381	0.000444989	0.0192029	0.0106531	8626/1647/7040	3
	GO:0071549	cellular response to dexamethasone stimulus	2018-02-16	35/17381	0.000464417	0.0192029	0.0106531	3383/7040	2
	GO:2000377	regulation of reactive oxygen species metabolic process	2018-03-16	170/17381	0.000468763	0.0192029	0.0106531	3383/1647/7040	3
	GO:0050679	positive regulation of epithelial cell proliferation	2018-03-16	171/17381	0.000476865	0.0192029	0.0106531	8626/8828/7040	3
	GO:0071219	cellular response to molecule of bacterial origin	2018-03-16	173/17381	0.00049334	0.0192029	0.0106531	3383/4846/7040	3
	GO:0050731	positive regulation of peptidyl-tyrosine phosphorylation	2018-03-16	174/17381	0.000501714	0.0192029	0.0106531	3383/3589/7040	3
	GO:0034405	response to fluid shear stress	2018-02-16	37/17381	0.000519277	0.0192029	0.0106531	4846/7040	2
	GO:0048608	reproductive structure development	2018-04-16	429/17381	0.000526182	0.0192029	0.0106531	3383/2034/4846/8626	4
	GO:0061458	reproductive system development	2018-04-16	432/17381	0.000540203	0.0192029	0.0106531	3383/2034/4846/8626	4
	GO:1902042	negative regulation of extrinsic apoptotic signaling pathway via death domain receptors	2018-02-16	38/17381	0.000547831	0.0192029	0.0106531	3383/4846	2
	GO:0009314	response to radiation	2018-04-16	437/17381	0.000564163	0.0192683	0.0106894	3383/8626/1647/7040	4
	GO:0043542	endothelial cell migration	2018-03-16	184/17381	0.000590516	0.0196642	0.010909	4846/8828/7040	3
	GO:0071216	cellular response to biotic stimulus	2018-03-16	195/17381	0.000699198	0.0222571	0.0123475	3383/4846/7040	3
	GO:0048483	autonomic nervous system development	2018-02-16	43/17381	0.000701801	0.0222571	0.0123475	8626/8828	2
	GO:0007254	JNK cascade	2018-03-16	199/17381	0.000741677	0.0229747	0.0127456	7786/10114/1647	3
	GO:0071548	response to dexamethasone	2018-02-16	46/17381	0.000803096	0.0243119	0.0134874	3383/7040	2
	GO:0051701	interaction with host	2018-03-16	209/17381	0.000855006	0.0253082	0.0140401	7852/3383/7040	3
	GO:0051051	negative regulation of transport	2018-04-16	500/17381	0.000935031	0.0270753	0.0150204	3383/3589/4846/7040	4
	GO:0097191	extrinsic apoptotic signaling pathway	2018-03-16	218/17381	0.000965966	0.0273759	0.0151872	3383/4846/7040	3
	GO:0000075	cell cycle checkpoint	2018-03-16	225/17381	0.00105832	0.028557	0.0158424	8626/1647/7040	3
	GO:0031663	lipopolysaccharide-mediated signaling pathway	2018-02-16	53/17381	0.00106523	0.028557	0.0158424	4846/7040	2
	GO:0051924	regulation of calcium ion transport	2018-03-16	226/17381	0.00107196	0.028557	0.0158424	3383/4846/7040	3
	GO:0050730	regulation of peptidyl-tyrosine phosphorylation	2018-03-16	233/17381	0.00117054	0.0305717	0.0169601	3383/3589/7040	3
	GO:1902041	regulation of extrinsic apoptotic signaling pathway via death domain receptors	2018-02-16	59/17381	0.0013184	0.0337714	0.0187352	3383/4846	2
	GO:0071385	cellular response to glucocorticoid stimulus	2018-02-16	61/17381	0.00140858	0.0354006	0.0196391	3383/7040	2
	GO:0007050	cell cycle arrest	2018-03-16	251/17381	0.00144993	0.0356109	0.0197557	11186/1647/7040	3
	GO:0071384	cellular response to corticosteroid stimulus	2018-02-16	64/17381	0.00154926	0.0356109	0.0197557	3383/7040	2
	GO:0071383	cellular response to steroid hormone stimulus	2018-03-16	259/17381	0.00158648	0.0356109	0.0197557	3383/8626/7040	3
	GO:0006801	superoxide metabolic process	2018-02-16	65/17381	0.00159758	0.0356109	0.0197557	4846/7040	2
	GO:1904888	cranial skeletal system development	2018-02-16	65/17381	0.00159758	0.0356109	0.0197557	8626/7040	2
	GO:0010631	epithelial cell migration	2018-03-16	260/17381	0.00160409	0.0356109	0.0197557	4846/8828/7040	3
	GO:0051403	stress-activated MAPK cascade	2018-03-16	260/17381	0.00160409	0.0356109	0.0197557	7786/10114/1647	3
	GO:0071479	cellular response to ionizing radiation	2018-02-16	66/17381	0.00164662	0.0356135	0.0197571	1647/7040	2
	GO:0090132	epithelium migration	2018-03-16	263/17381	0.00165768	0.0356135	0.0197571	4846/8828/7040	3
	GO:0090130	tissue migration	2018-03-16	269/17381	0.00176822	0.0367348	0.0203792	4846/8828/7040	3
	GO:0007548	sex differentiation	2018-03-16	271/17381	0.00180608	0.0367348	0.0203792	3383/4846/8626	3
	GO:0060047	heart contraction	2018-03-16	272/17381	0.00182519	0.0367348	0.0203792	2034/5606/4846	3
	GO:0006809	nitric oxide biosynthetic process	2018-02-16	70/17381	0.00184992	0.0367348	0.0203792	3383/4846	2
	GO:0031571	mitotic G1 DNA damage checkpoint	2018-02-16	71/17381	0.00190252	0.0367348	0.0203792	8626/1647	2
	GO:0044819	mitotic G1/S transition checkpoint	2018-02-16	71/17381	0.00190252	0.0367348	0.0203792	8626/1647	2
	GO:0003015	heart process	2018-03-16	276/17381	0.00190293	0.0367348	0.0203792	2034/5606/4846	3
	GO:0044783	G1 DNA damage checkpoint	2018-02-16	72/17381	0.00195583	0.0372166	0.0206465	8626/1647	2
	GO:0035019	somatic stem cell population maintenance	2018-02-16	73/17381	0.00200984	0.0377058	0.0209179	2034/8626	2
	GO:0046209	nitric oxide metabolic process	2018-02-16	74/17381	0.00206456	0.0381944	0.0211889	3383/4846	2
	GO:0071496	cellular response to external stimulus	2018-03-16	288/17381	0.00214852	0.039057	0.0216675	3383/1647/7040	3
	GO:1903522	regulation of blood circulation	2018-03-16	289/17381	0.00216984	0.039057	0.0216675	3383/2034/4846	3
	GO:2001057	reactive nitrogen species metabolic process	2018-02-16	77/17381	0.00223295	0.0391636	0.0217266	3383/4846	2
	GO:0007568	aging	2018-03-16	294/17381	0.00227841	0.0391636	0.0217266	3383/8626/7040	3
	GO:0071260	cellular response to mechanical stimulus	2018-02-16	78/17381	0.00229049	0.0391636	0.0217266	1647/7040	2
	GO:0071214	cellular response to abiotic stimulus	2018-03-16	296/17381	0.00232277	0.0391636	0.0217266	8626/1647/7040	3
	GO:0104004	cellular response to environmental stimulus	2018-03-16	296/17381	0.00232277	0.0391636	0.0217266	8626/1647/7040	3
	GO:0010595	positive regulation of endothelial cell migration	2018-02-16	80/17381	0.00240765	0.0400874	0.0222391	8828/7040	2
	GO:0045930	negative regulation of mitotic cell cycle	2018-03-16	305/17381	0.00252908	0.0405654	0.0225042	8626/1647/7040	3
	GO:0050678	regulation of epithelial cell proliferation	2018-03-16	307/17381	0.00257643	0.0405654	0.0225042	8626/8828/7040	3
	GO:0002028	regulation of sodium ion transport	2018-02-16	83/17381	0.00258863	0.0405654	0.0225042	4846/7040	2
	GO:0008625	extrinsic apoptotic signaling pathway via death domain receptors	2018-02-16	83/17381	0.00258863	0.0405654	0.0225042	3383/4846	2
	GO:0045445	myoblast differentiation	2018-02-16	83/17381	0.00258863	0.0405654	0.0225042	2034/7040	2
	GO:0022602	ovulation cycle process	2018-02-16	85/17381	0.00271275	0.0410612	0.0227794	3383/4846	2
	GO:0045778	positive regulation of ossification	2018-02-16	85/17381	0.00271275	0.0410612	0.0227794	8626/7040	2
	GO:0048709	oligodendrocyte differentiation	2018-02-16	85/17381	0.00271275	0.0410612	0.0227794	7852/7040	2
	GO:1901655	cellular response to ketone	2018-02-16	86/17381	0.00277586	0.0413855	0.0229593	3383/7040	2
	GO:0032496	response to lipopolysaccharide	2018-03-16	316/17381	0.00279632	0.0413855	0.0229593	3383/4846/7040	3
	GO:0071158	positive regulation of cell cycle arrest	2018-02-16	88/17381	0.00290413	0.0425088	0.0235824	1647/7040	2
	GO:0060333	interferon-gamma-mediated signaling pathway	2018-02-16	89/17381	0.0029693	0.0429903	0.0238495	3383/3660	2
	GO:0002237	response to molecule of bacterial origin	2018-03-16	333/17381	0.00324278	0.0464449	0.025766	3383/4846/7040	3
	GO:0008585	female gonad development	2018-02-16	97/17381	0.0035153	0.0498125	0.0276342	3383/4846	2
Module 18	GO:1904030	negative regulation of cyclin-dependent protein kinase activity	2018-02-03	27/17381	6.96494e-06	0.000891512	0.000183288	1028/1050	2
	GO:1904029	regulation of cyclin-dependent protein kinase activity	2018-02-03	88/17381	7.57816e-05	0.00345847	0.000711034	1028/1050	2
	GO:0001892	embryonic placenta development	2018-02-03	91/17381	8.10579e-05	0.00345847	0.000711034	1028/1050	2
	GO:0071901	negative regulation of protein serine/threonine kinase activity	2018-02-03	131/17381	0.000168289	0.00538526	0.00110717	1028/1050	2
	GO:0001890	placenta development	2018-02-03	147/17381	0.000211955	0.00542606	0.00111555	1028/1050	2
	GO:0048469	cell maturation	2018-02-03	166/17381	0.000270301	0.00576642	0.00118553	1028/1050	2
	GO:0006469	negative regulation of protein kinase activity	2018-02-03	255/17381	0.000636994	0.0102718	0.00211179	1028/1050	2
	GO:0021700	developmental maturation	2018-02-03	256/17381	0.000641985	0.0102718	0.00211179	1028/1050	2
	GO:0033673	negative regulation of kinase activity	2018-02-03	273/17381	0.000729776	0.010379	0.00213385	1028/1050	2
	GO:0001701	in utero embryonic development	2018-02-03	315/17381	0.00097049	0.0123629	0.00254171	1028/1050	2
	GO:0051348	negative regulation of transferase activity	2018-02-03	369/17381	0.00132958	0.0123629	0.00254171	1028/1050	2
	GO:0030099	myeloid cell differentiation	2018-02-03	390/17381	0.00148422	0.0123629	0.00254171	1028/1050	2
	GO:0048568	embryonic organ development	2018-02-03	422/17381	0.00173595	0.0123629	0.00254171	1028/1050	2
	GO:0048732	gland development	2018-02-03	422/17381	0.00173595	0.0123629	0.00254171	1028/1050	2
	GO:0001933	negative regulation of protein phosphorylation	2018-02-03	424/17381	0.00175233	0.0123629	0.00254171	1028/1050	2
	GO:0048608	reproductive structure development	2018-02-03	429/17381	0.0017936	0.0123629	0.00254171	1028/1050	2
	GO:0061458	reproductive system development	2018-02-03	432/17381	0.00181859	0.0123629	0.00254171	1028/1050	2
	GO:0045945	positive regulation of transcription from RNA polymerase III promoter	2018-01-03	11/17381	0.00189753	0.0123629	0.00254171	1050	1
	GO:0000050	urea cycle	2018-01-03	12/17381	0.00206992	0.0123629	0.00254171	1050	1
	GO:0042326	negative regulation of phosphorylation	2018-02-03	462/17381	0.00207782	0.0123629	0.00254171	1028/1050	2
	GO:0002521	leukocyte differentiation	2018-02-03	479/17381	0.00223223	0.0123629	0.00254171	1050/1316	2
	GO:0050872	white fat cell differentiation	2018-01-03	13/17381	0.00224228	0.0123629	0.00254171	1050	1
	GO:0071285	cellular response to lithium ion	2018-01-03	13/17381	0.00224228	0.0123629	0.00254171	1050	1
	GO:0071900	regulation of protein serine/threonine kinase activity	2018-02-03	495/17381	0.00238252	0.0123629	0.00254171	1028/1050	2
	GO:0019627	urea metabolic process	2018-01-03	14/17381	0.00241462	0.0123629	0.00254171	1050	1
	GO:0071941	nitrogen cycle metabolic process	2018-01-03	15/17381	0.00258695	0.0127357	0.00261837	1050	1
	GO:0007096	regulation of exit from mitosis	2018-01-03	19/17381	0.00327605	0.0155309	0.00319303	1028	1
	GO:0060065	uterus development	2018-01-03	20/17381	0.00344827	0.0157635	0.00324086	1028	1
	GO:0030325	adrenal gland development	2018-01-03	22/17381	0.00379266	0.016545	0.00340153	1028	1
	GO:0010226	response to lithium ion	2018-01-03	23/17381	0.00396483	0.016545	0.00340153	1050	1
	GO:0030511	positive regulation of transforming growth factor beta receptor signaling pathway	2018-01-03	25/17381	0.0043091	0.016545	0.00340153	1028	1
	GO:0045736	negative regulation of cyclin-dependent protein serine/threonine kinase activity	2018-01-03	25/17381	0.0043091	0.016545	0.00340153	1050	1
	GO:1903846	positive regulation of cellular response to transforming growth factor beta stimulus	2018-01-03	25/17381	0.0043091	0.016545	0.00340153	1028	1
	GO:0060669	embryonic placenta morphogenesis	2018-01-03	26/17381	0.00448121	0.016545	0.00340153	1028	1
	GO:0006359	regulation of transcription from RNA polymerase III promoter	2018-01-03	27/17381	0.00465329	0.016545	0.00340153	1050	1
	GO:0071514	genetic imprinting	2018-01-03	27/17381	0.00465329	0.016545	0.00340153	1028	1
	GO:0030851	granulocyte differentiation	2018-01-03	30/17381	0.00516943	0.0174128	0.00357994	1050	1
	GO:0070306	lens fiber cell differentiation	2018-01-03	30/17381	0.00516943	0.0174128	0.00357994	1028	1
	GO:0010458	exit from mitosis	2018-01-03	31/17381	0.00534144	0.0175309	0.00360421	1028	1
	GO:0030225	macrophage differentiation	2018-01-03	38/17381	0.00654493	0.0209438	0.00430588	1050	1
	GO:0050873	brown fat cell differentiation	2018-01-03	39/17381	0.00671678	0.0209695	0.00431116	1050	1
	GO:0042551	neuron maturation	2018-01-03	41/17381	0.00706042	0.0215175	0.00442382	1028	1
	GO:0006383	transcription from RNA polymerase III promoter	2018-01-03	54/17381	0.00929213	0.0276603	0.00568674	1050	1
	GO:0045600	positive regulation of fat cell differentiation	2018-01-03	58/17381	0.00997813	0.0290273	0.00596778	1050	1
	GO:0045669	positive regulation of osteoblast differentiation	2018-01-03	60/17381	0.010321	0.0293576	0.00603568	1050	1
	GO:0002088	lens development in camera-type eye	2018-01-03	68/17381	0.0116918	0.0325336	0.00668865	1028	1
	GO:0032436	positive regulation of proteasomal ubiquitin-dependent protein catabolic process	2018-01-03	80/17381	0.0137455	0.0374346	0.00769625	1050	1
	GO:0000079	regulation of cyclin-dependent protein serine/threonine kinase activity	2018-01-03	84/17381	0.0144295	0.0381398	0.00784124	1050	1
	GO:0045778	positive regulation of ossification	2018-01-03	85/17381	0.0146004	0.0381398	0.00784124	1050	1
	GO:0090100	positive regulation of transmembrane receptor protein serine/threonine kinase signaling pathway	2018-01-03	100/17381	0.0171621	0.043505	0.00894428	1028	1
	GO:1901800	positive regulation of proteasomal protein catabolic process	2018-01-03	102/17381	0.0175033	0.043505	0.00894428	1050	1
	GO:0017015	regulation of transforming growth factor beta receptor signaling pathway	2018-01-03	103/17381	0.0176739	0.043505	0.00894428	1028	1
	GO:1903844	regulation of cellular response to transforming growth factor beta stimulus	2018-01-03	105/17381	0.018015	0.0435079	0.00894489	1028	1
	GO:0045667	regulation of osteoblast differentiation	2018-01-03	113/17381	0.0193786	0.0450219	0.00925614	1050	1
	GO:0032434	regulation of proteasomal ubiquitin-dependent protein catabolic process	2018-01-03	115/17381	0.0197193	0.0450219	0.00925614	1050	1
	GO:0055088	lipid homeostasis	2018-01-03	116/17381	0.0198897	0.0450219	0.00925614	1050	1
	GO:0030183	B cell differentiation	2018-01-03	118/17381	0.0202303	0.0450219	0.00925614	1316	1
	GO:0045598	regulation of fat cell differentiation	2018-01-03	119/17381	0.0204005	0.0450219	0.00925614	1050	1
	GO:0035270	endocrine system development	2018-01-03	127/17381	0.021762	0.0464255	0.00954472	1028	1
	GO:0050680	negative regulation of epithelial cell proliferation	2018-01-03	127/17381	0.021762	0.0464255	0.00954472	1028	1
	GO:0001889	liver development	2018-01-03	133/17381	0.0227822	0.0473235	0.00972934	1050	1
	GO:0008203	cholesterol metabolic process	2018-01-03	135/17381	0.0231221	0.0473235	0.00972934	1050	1
	GO:0061008	hepaticobiliary system development	2018-01-03	136/17381	0.023292	0.0473235	0.00972934	1050	1
	GO:1902652	secondary alcohol metabolic process	2018-01-03	140/17381	0.0239716	0.0474783	0.00976117	1050	1
	GO:0030856	regulation of epithelial cell differentiation	2018-01-03	143/17381	0.024481	0.0474783	0.00976117	1028	1
	GO:0055123	digestive system development	2018-01-03	143/17381	0.024481	0.0474783	0.00976117	1028	1
	GO:0035264	multicellular organism growth	2018-01-03	146/17381	0.0249903	0.0477426	0.0098155	1028	1
	GO:0071695	anatomical structure maturation	2018-01-03	150/17381	0.025669	0.0478681	0.0098413	1028	1
	GO:0016125	sterol metabolic process	2018-01-03	153/17381	0.0261779	0.0478681	0.0098413	1050	1
	GO:0071248	cellular response to metal ion	2018-01-03	153/17381	0.0261779	0.0478681	0.0098413	1050	1
	GO:0007088	regulation of mitotic nuclear division	2018-01-03	157/17381	0.026856	0.0484165	0.00995406	1028	1
	GO:0007219	Notch signaling pathway	2018-01-03	169/17381	0.0288887	0.0499272	0.0102646	1050	1
	GO:0061136	regulation of proteasomal protein catabolic process	2018-01-03	169/17381	0.0288887	0.0499272	0.0102646	1050	1
	GO:0030324	lung development	2018-01-03	171/17381	0.0292272	0.0499272	0.0102646	1050	1
	GO:0007179	transforming growth factor beta receptor signaling pathway	2018-01-03	174/17381	0.0297348	0.0499272	0.0102646	1028	1
	GO:0030323	respiratory tube development	2018-01-03	175/17381	0.029904	0.0499272	0.0102646	1050	1
	GO:0071241	cellular response to inorganic substance	2018-01-03	178/17381	0.0304114	0.0499272	0.0102646	1050	1
	GO:0048839	inner ear development	2018-01-03	181/17381	0.0309186	0.0499272	0.0102646	1050	1
	GO:0051783	regulation of nuclear division	2018-01-03	181/17381	0.0309186	0.0499272	0.0102646	1028	1
	GO:0030278	regulation of ossification	2018-01-03	184/17381	0.0314256	0.0499272	0.0102646	1050	1
	GO:1903052	positive regulation of proteolysis involved in cellular protein catabolic process	2018-01-03	185/17381	0.0315946	0.0499272	0.0102646	1050	1
Module 19	GO:0006346	methylation-dependent chromatin silencing	2018-01-02	20/17381	0.00230011	0.0265311	0.000979913	80312	1
	GO:0071711	basement membrane organization	2018-01-02	20/17381	0.00230011	0.0265311	0.000979913	4320	1
	GO:0080111	DNA demethylation	2018-01-02	20/17381	0.00230011	0.0265311	0.000979913	80312	1
	GO:0031935	regulation of chromatin silencing	2018-01-02	21/17381	0.00241504	0.0265311	0.000979913	80312	1
	GO:0060969	negative regulation of gene silencing	2018-01-02	22/17381	0.00252997	0.0265311	0.000979913	80312	1
	GO:0035510	DNA dealkylation	2018-01-02	26/17381	0.00298962	0.0265311	0.000979913	80312	1
	GO:0001825	blastocyst formation	2018-01-02	29/17381	0.00333429	0.0265311	0.000979913	80312	1
	GO:0031062	positive regulation of histone methylation	2018-01-02	33/17381	0.00379375	0.0265311	0.000979913	80312	1
	GO:0030199	collagen fibril organization	2018-01-02	45/17381	0.00517151	0.0265311	0.000979913	4320	1
	GO:0045599	negative regulation of fat cell differentiation	2018-01-02	47/17381	0.00540105	0.0265311	0.000979913	4320	1
	GO:1905268	negative regulation of chromatin organization	2018-01-02	47/17381	0.00540105	0.0265311	0.000979913	80312	1
	GO:0031060	regulation of histone methylation	2018-01-02	56/17381	0.00643362	0.0265311	0.000979913	80312	1
	GO:0001824	blastocyst development	2018-01-02	61/17381	0.00700704	0.0265311	0.000979913	80312	1
	GO:0070988	demethylation	2018-01-02	63/17381	0.00723636	0.0265311	0.000979913	80312	1
	GO:0030574	collagen catabolic process	2018-01-02	68/17381	0.00780955	0.0265311	0.000979913	4320	1
	GO:0044243	multicellular organismal catabolic process	2018-01-02	76/17381	0.00872631	0.0265311	0.000979913	4320	1
	GO:0045815	positive regulation of gene expression, epigenetic	2018-01-02	80/17381	0.00918453	0.0265311	0.000979913	80312	1
	GO:0031058	positive regulation of histone modification	2018-01-02	82/17381	0.0094136	0.0265311	0.000979913	80312	1
	GO:0044728	DNA methylation or demethylation	2018-01-02	83/17381	0.00952813	0.0265311	0.000979913	80312	1
	GO:1905269	positive regulation of chromatin organization	2018-01-02	89/17381	0.0102151	0.0265311	0.000979913	80312	1
	GO:0022617	extracellular matrix disassembly	2018-01-02	92/17381	0.0105586	0.0265311	0.000979913	4320	1
	GO:0006304	DNA modification	2018-01-02	104/17381	0.0119316	0.0265311	0.000979913	80312	1
	GO:0006493	protein O-linked glycosylation	2018-01-02	110/17381	0.0126178	0.0265311	0.000979913	80312	1
	GO:0006342	chromatin silencing	2018-01-02	118/17381	0.0135323	0.0265311	0.000979913	80312	1
	GO:0045598	regulation of fat cell differentiation	2018-01-02	119/17381	0.0136466	0.0265311	0.000979913	4320	1
	GO:2001251	negative regulation of chromosome organization	2018-01-02	124/17381	0.014218	0.0265311	0.000979913	80312	1
	GO:0032963	collagen metabolic process	2018-01-02	125/17381	0.0143322	0.0265311	0.000979913	4320	1
	GO:0016571	histone methylation	2018-01-02	129/17381	0.0147891	0.0265311	0.000979913	80312	1
	GO:0051053	negative regulation of DNA metabolic process	2018-01-02	129/17381	0.0147891	0.0265311	0.000979913	80312	1
	GO:0044259	multicellular organismal macromolecule metabolic process	2018-01-02	130/17381	0.0149033	0.0265311	0.000979913	4320	1
	GO:0031056	regulation of histone modification	2018-01-02	131/17381	0.0150176	0.0265311	0.000979913	80312	1
	GO:0060968	regulation of gene silencing	2018-01-02	131/17381	0.0150176	0.0265311	0.000979913	80312	1
	GO:0045814	negative regulation of gene expression, epigenetic	2018-01-02	134/17381	0.0153601	0.0265311	0.000979913	80312	1
	GO:0044236	multicellular organism metabolic process	2018-01-02	151/17381	0.0173003	0.027148	0.0010027	4320	1
	GO:0019827	stem cell population maintenance	2018-01-02	155/17381	0.0177565	0.027148	0.0010027	80312	1
	GO:2001252	positive regulation of chromosome organization	2018-01-02	156/17381	0.0178706	0.027148	0.0010027	80312	1
	GO:0098727	maintenance of cell number	2018-01-02	157/17381	0.0179846	0.027148	0.0010027	80312	1
	GO:1902275	regulation of chromatin organization	2018-01-02	158/17381	0.0180987	0.027148	0.0010027	80312	1
	GO:0006479	protein methylation	2018-01-02	175/17381	0.0200361	0.0285515	0.00105453	80312	1
	GO:0008213	protein alkylation	2018-01-02	175/17381	0.0200361	0.0285515	0.00105453	80312	1
	GO:0045444	fat cell differentiation	2018-01-02	210/17381	0.024019	0.0333923	0.00123333	4320	1
	GO:0043414	macromolecule methylation	2018-01-02	288/17381	0.032866	0.0425475	0.00157147	80312	1
	GO:0006486	protein glycosylation	2018-01-02	289/17381	0.0329792	0.0425475	0.00157147	80312	1
	GO:0043413	macromolecule glycosylation	2018-01-02	289/17381	0.0329792	0.0425475	0.00157147	80312	1
	GO:0070085	glycosylation	2018-01-02	299/17381	0.0341104	0.0425475	0.00157147	80312	1
	GO:0033044	regulation of chromosome organization	2018-01-02	301/17381	0.0343366	0.0425475	0.00157147	80312	1
	GO:0001701	in utero embryonic development	2018-01-02	315/17381	0.035919	0.0435614	0.00160892	80312	1
	GO:0030198	extracellular matrix organization	2018-01-02	335/17381	0.0381774	0.0441655	0.00163123	4320	1
	GO:0043062	extracellular structure organization	2018-01-02	336/17381	0.0382903	0.0441655	0.00163123	4320	1
	GO:0010639	negative regulation of organelle organization	2018-01-02	340/17381	0.0387416	0.0441655	0.00163123	80312	1
	GO:0032259	methylation	2018-01-02	350/17381	0.0398695	0.04456	0.0016458	80312	1
	GO:0009101	glycoprotein biosynthetic process	2018-01-02	361/17381	0.0411094	0.0450622	0.00166435	80312	1
	GO:0051052	regulation of DNA metabolic process	2018-01-02	391/17381	0.0444869	0.0478444	0.0017671	80312	1
Module 20	GO:0051256	mitotic spindle midzone assembly	2018-01-03	10/17381	0.00172513	0.027733	0.0077968	8556	1
	GO:0086016	AV node cell action potential	2018-01-03	11/17381	0.00189753	0.027733	0.0077968	775	1
	GO:0086027	AV node cell to bundle of His cell signaling	2018-01-03	11/17381	0.00189753	0.027733	0.0077968	775	1
	GO:0000022	mitotic spindle elongation	2018-01-03	12/17381	0.00206992	0.027733	0.0077968	8556	1
	GO:0051255	spindle midzone assembly	2018-01-03	12/17381	0.00206992	0.027733	0.0077968	8556	1
	GO:0086067	AV node cell to bundle of His cell communication	2018-01-03	12/17381	0.00206992	0.027733	0.0077968	775	1
	GO:0051231	spindle elongation	2018-01-03	13/17381	0.00224228	0.027733	0.0077968	8556	1
	GO:0051770	positive regulation of nitric-oxide synthase biosynthetic process	2018-01-03	14/17381	0.00241462	0.027733	0.0077968	10135	1
	GO:0034356	NAD biosynthesis via nicotinamide riboside salvage pathway	2018-01-03	15/17381	0.00258695	0.027733	0.0077968	10135	1
	GO:0061577	calcium ion transmembrane transport via high voltage-gated calcium channel	2018-01-03	15/17381	0.00258695	0.027733	0.0077968	775	1
	GO:0071850	mitotic cell cycle arrest	2018-01-03	15/17381	0.00258695	0.027733	0.0077968	8556	1
	GO:0051767	nitric-oxide synthase biosynthetic process	2018-01-03	18/17381	0.0031038	0.027733	0.0077968	10135	1
	GO:0051769	regulation of nitric-oxide synthase biosynthetic process	2018-01-03	18/17381	0.0031038	0.027733	0.0077968	10135	1
	GO:0098911	regulation of ventricular cardiac muscle cell action potential	2018-01-03	18/17381	0.0031038	0.027733	0.0077968	775	1
	GO:0007096	regulation of exit from mitosis	2018-01-03	19/17381	0.00327605	0.027733	0.0077968	8556	1
	GO:0086014	atrial cardiac muscle cell action potential	2018-01-03	20/17381	0.00344827	0.027733	0.0077968	775	1
	GO:0086026	atrial cardiac muscle cell to AV node cell signaling	2018-01-03	20/17381	0.00344827	0.027733	0.0077968	775	1
	GO:0086066	atrial cardiac muscle cell to AV node cell communication	2018-01-03	20/17381	0.00344827	0.027733	0.0077968	775	1
	GO:0010881	regulation of cardiac muscle contraction by regulation of the release of sequestered calcium ion	2018-01-03	22/17381	0.00379266	0.027733	0.0077968	775	1
	GO:0086012	membrane depolarization during cardiac muscle cell action potential	2018-01-03	23/17381	0.00396483	0.027733	0.0077968	775	1
	GO:0086064	cell communication by electrical coupling involved in cardiac conduction	2018-01-03	23/17381	0.00396483	0.027733	0.0077968	775	1
	GO:0009435	NAD biosynthetic process	2018-01-03	27/17381	0.00465329	0.027733	0.0077968	10135	1
	GO:0010882	regulation of cardiac muscle contraction by calcium ion signaling	2018-01-03	27/17381	0.00465329	0.027733	0.0077968	775	1
	GO:0010644	cell communication by electrical coupling	2018-01-03	28/17381	0.00482536	0.027733	0.0077968	775	1
	GO:0010880	regulation of release of sequestered calcium ion into cytosol by sarcoplasmic reticulum	2018-01-03	30/17381	0.00516943	0.027733	0.0077968	775	1
	GO:0010458	exit from mitosis	2018-01-03	31/17381	0.00534144	0.027733	0.0077968	8556	1
	GO:0019359	nicotinamide nucleotide biosynthetic process	2018-01-03	31/17381	0.00534144	0.027733	0.0077968	10135	1
	GO:0019363	pyridine nucleotide biosynthetic process	2018-01-03	31/17381	0.00534144	0.027733	0.0077968	10135	1
	GO:0035115	embryonic forelimb morphogenesis	2018-01-03	32/17381	0.00551343	0.027733	0.0077968	775	1
	GO:0086019	cell-cell signaling involved in cardiac conduction	2018-01-03	32/17381	0.00551343	0.027733	0.0077968	775	1
	GO:0098901	regulation of cardiac muscle cell action potential	2018-01-03	33/17381	0.00568539	0.027733	0.0077968	775	1
	GO:0014808	release of sequestered calcium ion into cytosol by sarcoplasmic reticulum	2018-01-03	34/17381	0.00585734	0.027733	0.0077968	775	1
	GO:0072525	pyridine-containing compound biosynthetic process	2018-01-03	34/17381	0.00585734	0.027733	0.0077968	10135	1
	GO:0086005	ventricular cardiac muscle cell action potential	2018-01-03	35/17381	0.00602927	0.027733	0.0077968	775	1
	GO:1903514	release of sequestered calcium ion into cytosol by endoplasmic reticulum	2018-01-03	35/17381	0.00602927	0.027733	0.0077968	775	1
	GO:0086091	regulation of heart rate by cardiac conduction	2018-01-03	36/17381	0.00620118	0.027733	0.0077968	775	1
	GO:0070296	sarcoplasmic reticulum calcium ion transport	2018-01-03	38/17381	0.00654493	0.0284376	0.00799488	775	1
	GO:0035136	forelimb morphogenesis	2018-01-03	40/17381	0.00688861	0.0284376	0.00799488	775	1
	GO:0086004	regulation of cardiac muscle cell contraction	2018-01-03	40/17381	0.00688861	0.0284376	0.00799488	775	1
	GO:1903115	regulation of actin filament-based movement	2018-01-03	45/17381	0.00774745	0.0311835	0.00876686	775	1
	GO:0086010	membrane depolarization during action potential	2018-01-03	49/17381	0.00843417	0.0331196	0.00931116	775	1
	GO:0086002	cardiac muscle cell action potential involved in contraction	2018-01-03	53/17381	0.00912058	0.0338589	0.009519	775	1
	GO:0098900	regulation of action potential	2018-01-03	54/17381	0.00929213	0.0338589	0.009519	775	1
	GO:0032922	circadian regulation of gene expression	2018-01-03	55/17381	0.00946366	0.0338589	0.009519	10135	1
	GO:0086065	cell communication involved in cardiac conduction	2018-01-03	55/17381	0.00946366	0.0338589	0.009519	775	1
	GO:0090307	mitotic spindle assembly	2018-01-03	59/17381	0.0101496	0.0355236	0.00998701	8556	1
	GO:0086003	cardiac muscle cell contraction	2018-01-03	63/17381	0.0108352	0.0371163	0.0104348	775	1
	GO:0019674	NAD metabolic process	2018-01-03	70/17381	0.0120343	0.0401037	0.0112747	10135	1
	GO:0086001	cardiac muscle cell action potential	2018-01-03	71/17381	0.0122055	0.0401037	0.0112747	775	1
	GO:0051279	regulation of release of sequestered calcium ion into cytosol	2018-01-03	77/17381	0.0132323	0.041499	0.0116669	775	1
	GO:0055117	regulation of cardiac muscle contraction	2018-01-03	77/17381	0.0132323	0.041499	0.0116669	775	1
	GO:0048661	positive regulation of smooth muscle cell proliferation	2018-01-03	78/17381	0.0134034	0.041499	0.0116669	10135	1
	GO:0006942	regulation of striated muscle contraction	2018-01-03	91/17381	0.0156256	0.0474665	0.0133446	775	1
	GO:0051225	spindle assembly	2018-01-03	96/17381	0.0164794	0.0477633	0.0134281	8556	1
	GO:0002027	regulation of heart rate	2018-01-03	97/17381	0.0166501	0.0477633	0.0134281	775	1
	GO:0010522	regulation of calcium ion transport into cytosol	2018-01-03	97/17381	0.0166501	0.0477633	0.0134281	775	1
	GO:0035335	peptidyl-tyrosine dephosphorylation	2018-01-03	99/17381	0.0169915	0.0477633	0.0134281	8556	1
	GO:0051899	membrane depolarization	2018-01-03	101/17381	0.0173327	0.0477633	0.0134281	775	1
	GO:0007052	mitotic spindle organization	2018-01-03	102/17381	0.0175033	0.0477633	0.0134281	8556	1
	GO:0070252	actin-mediated cell contraction	2018-01-03	110/17381	0.0188674	0.0495232	0.0139228	775	1
	GO:0051209	release of sequestered calcium ion into cytosol	2018-01-03	112/17381	0.0192083	0.0495232	0.0139228	775	1
	GO:0051283	negative regulation of sequestering of calcium ion	2018-01-03	112/17381	0.0192083	0.0495232	0.0139228	775	1
	GO:0051282	regulation of sequestering of calcium ion	2018-01-03	113/17381	0.0193786	0.0495232	0.0139228	775	1
Module 21	GO:0072577	endothelial cell apoptotic process	2018-02-03	49/17381	2.33158e-05	0.0124506	0.00208615	3586/4780	2
	GO:1904019	epithelial cell apoptotic process	2018-02-03	91/17381	8.10579e-05	0.0216425	0.00362627	3586/4780	2
	GO:0045995	regulation of embryonic development	2018-02-03	124/17381	0.00015076	0.0247764	0.00415137	3586/4780	2
	GO:1903034	regulation of response to wounding	2018-02-03	168/17381	0.000276852	0.0247764	0.00415137	3586/4780	2
	GO:2000377	regulation of reactive oxygen species metabolic process	2018-02-03	170/17381	0.000283481	0.0247764	0.00415137	3586/4780	2
	GO:0072593	reactive oxygen species metabolic process	2018-02-03	251/17381	0.000617223	0.0247764	0.00415137	3586/4780	2
	GO:0007568	aging	2018-02-03	294/17381	0.000845901	0.0247764	0.00415137	3586/4780	2
	GO:0042176	regulation of protein catabolic process	2018-02-03	399/17381	0.00155306	0.0247764	0.00415137	3586/4780	2
	GO:0043434	response to peptide hormone	2018-02-03	410/17381	0.00163928	0.0247764	0.00415137	3586/4780	2
	GO:0042493	response to drug	2018-02-03	411/17381	0.00164723	0.0247764	0.00415137	3586/4780	2
	GO:0002683	negative regulation of immune system process	2018-02-03	412/17381	0.0016552	0.0247764	0.00415137	3586/4780	2
	GO:0034115	negative regulation of heterotypic cell-cell adhesion	2018-01-03	10/17381	0.00172513	0.0247764	0.00415137	3586	1
	GO:0070587	regulation of cell-cell adhesion involved in gastrulation	2018-01-03	10/17381	0.00172513	0.0247764	0.00415137	3586	1
	GO:0010975	regulation of neuron projection development	2018-02-03	425/17381	0.00176054	0.0247764	0.00415137	7431/4780	2
	GO:0002676	regulation of chronic inflammatory response	2018-01-03	11/17381	0.00189753	0.0247764	0.00415137	3586	1
	GO:0007253	cytoplasmic sequestering of NF-kappaB	2018-01-03	11/17381	0.00189753	0.0247764	0.00415137	3586	1
	GO:0043619	regulation of transcription from RNA polymerase II promoter in response to oxidative stress	2018-01-03	11/17381	0.00189753	0.0247764	0.00415137	4780	1
	GO:0070586	cell-cell adhesion involved in gastrulation	2018-01-03	11/17381	0.00189753	0.0247764	0.00415137	3586	1
	GO:1904753	negative regulation of vascular associated smooth muscle cell migration	2018-01-03	11/17381	0.00189753	0.0247764	0.00415137	4780	1
	GO:0002862	negative regulation of inflammatory response to antigenic stimulus	2018-01-03	12/17381	0.00206992	0.0247764	0.00415137	3586	1
	GO:0034116	positive regulation of heterotypic cell-cell adhesion	2018-01-03	12/17381	0.00206992	0.0247764	0.00415137	3586	1
	GO:0045346	regulation of MHC class II biosynthetic process	2018-01-03	12/17381	0.00206992	0.0247764	0.00415137	3586	1
	GO:0045351	type I interferon biosynthetic process	2018-01-03	12/17381	0.00206992	0.0247764	0.00415137	3586	1
	GO:0060670	branching involved in labyrinthine layer morphogenesis	2018-01-03	12/17381	0.00206992	0.0247764	0.00415137	3586	1
	GO:1900121	negative regulation of receptor binding	2018-01-03	12/17381	0.00206992	0.0247764	0.00415137	3586	1
	GO:2000121	regulation of removal of superoxide radicals	2018-01-03	12/17381	0.00206992	0.0247764	0.00415137	4780	1
	GO:1901652	response to peptide	2018-02-03	477/17381	0.00221379	0.0247764	0.00415137	3586/4780	2
	GO:0045342	MHC class II biosynthetic process	2018-01-03	13/17381	0.00224228	0.0247764	0.00415137	3586	1
	GO:0070307	lens fiber cell development	2018-01-03	13/17381	0.00224228	0.0247764	0.00415137	7431	1
	GO:0014854	response to inactivity	2018-01-03	14/17381	0.00241462	0.0247764	0.00415137	3586	1
	GO:0044130	negative regulation of growth of symbiont in host	2018-01-03	14/17381	0.00241462	0.0247764	0.00415137	3586	1
	GO:1904294	positive regulation of ERAD pathway	2018-01-03	14/17381	0.00241462	0.0247764	0.00415137	4780	1
	GO:0009404	toxin metabolic process	2018-01-03	15/17381	0.00258695	0.0247764	0.00415137	4780	1
	GO:0034616	response to laminar fluid shear stress	2018-01-03	15/17381	0.00258695	0.0247764	0.00415137	4780	1
	GO:0035729	cellular response to hepatocyte growth factor stimulus	2018-01-03	15/17381	0.00258695	0.0247764	0.00415137	3586	1
	GO:0044126	regulation of growth of symbiont in host	2018-01-03	15/17381	0.00258695	0.0247764	0.00415137	3586	1
	GO:0044146	negative regulation of growth of symbiont involved in interaction with host	2018-01-03	15/17381	0.00258695	0.0247764	0.00415137	3586	1
	GO:0002739	regulation of cytokine secretion involved in immune response	2018-01-03	16/17381	0.00275925	0.0247764	0.00415137	3586	1
	GO:0006750	glutathione biosynthetic process	2018-01-03	16/17381	0.00275925	0.0247764	0.00415137	4780	1
	GO:0030889	negative regulation of B cell proliferation	2018-01-03	16/17381	0.00275925	0.0247764	0.00415137	3586	1
	GO:0031645	negative regulation of neurological system process	2018-01-03	16/17381	0.00275925	0.0247764	0.00415137	3586	1
	GO:0032695	negative regulation of interleukin-12 production	2018-01-03	16/17381	0.00275925	0.0247764	0.00415137	3586	1
	GO:0044144	modulation of growth of symbiont involved in interaction with host	2018-01-03	16/17381	0.00275925	0.0247764	0.00415137	3586	1
	GO:0032717	negative regulation of interleukin-8 production	2018-01-03	17/17381	0.00293154	0.0247764	0.00415137	3586	1
	GO:0035728	response to hepatocyte growth factor	2018-01-03	17/17381	0.00293154	0.0247764	0.00415137	3586	1
	GO:0045019	negative regulation of nitric oxide biosynthetic process	2018-01-03	17/17381	0.00293154	0.0247764	0.00415137	3586	1
	GO:1904406	negative regulation of nitric oxide metabolic process	2018-01-03	17/17381	0.00293154	0.0247764	0.00415137	3586	1
	GO:1904706	negative regulation of vascular smooth muscle cell proliferation	2018-01-03	17/17381	0.00293154	0.0247764	0.00415137	3586	1
	GO:0002902	regulation of B cell apoptotic process	2018-01-03	18/17381	0.0031038	0.0247764	0.00415137	3586	1
	GO:0019184	nonribosomal peptide biosynthetic process	2018-01-03	18/17381	0.0031038	0.0247764	0.00415137	4780	1
	GO:0044117	growth of symbiont in host	2018-01-03	18/17381	0.0031038	0.0247764	0.00415137	3586	1
	GO:2000737	negative regulation of stem cell differentiation	2018-01-03	18/17381	0.0031038	0.0247764	0.00415137	4780	1
	GO:0032682	negative regulation of chemokine production	2018-01-03	19/17381	0.00327605	0.0247764	0.00415137	3586	1
	GO:0042533	tumor necrosis factor biosynthetic process	2018-01-03	19/17381	0.00327605	0.0247764	0.00415137	3586	1
	GO:0042534	regulation of tumor necrosis factor biosynthetic process	2018-01-03	19/17381	0.00327605	0.0247764	0.00415137	3586	1
	GO:0044110	growth involved in symbiotic interaction	2018-01-03	19/17381	0.00327605	0.0247764	0.00415137	3586	1
	GO:0044116	growth of symbiont involved in interaction with host	2018-01-03	19/17381	0.00327605	0.0247764	0.00415137	3586	1
	GO:0070230	positive regulation of lymphocyte apoptotic process	2018-01-03	19/17381	0.00327605	0.0247764	0.00415137	3586	1
	GO:0002374	cytokine secretion involved in immune response	2018-01-03	20/17381	0.00344827	0.0247764	0.00415137	3586	1
	GO:1902176	negative regulation of oxidative stress-induced intrinsic apoptotic signaling pathway	2018-01-03	20/17381	0.00344827	0.0247764	0.00415137	4780	1
	GO:0034114	regulation of heterotypic cell-cell adhesion	2018-01-03	21/17381	0.00362048	0.0247764	0.00415137	3586	1
	GO:0036499	PERK-mediated unfolded protein response	2018-01-03	21/17381	0.00362048	0.0247764	0.00415137	4780	1
	GO:0043032	positive regulation of macrophage activation	2018-01-03	21/17381	0.00362048	0.0247764	0.00415137	3586	1
	GO:0060713	labyrinthine layer morphogenesis	2018-01-03	21/17381	0.00362048	0.0247764	0.00415137	3586	1
	GO:0071498	cellular response to fluid shear stress	2018-01-03	21/17381	0.00362048	0.0247764	0.00415137	4780	1
	GO:1900120	regulation of receptor binding	2018-01-03	21/17381	0.00362048	0.0247764	0.00415137	3586	1
	GO:1904385	cellular response to angiotensin	2018-01-03	21/17381	0.00362048	0.0247764	0.00415137	4780	1
	GO:0002544	chronic inflammatory response	2018-01-03	22/17381	0.00379266	0.0247764	0.00415137	3586	1
	GO:0042762	regulation of sulfur metabolic process	2018-01-03	22/17381	0.00379266	0.0247764	0.00415137	4780	1
	GO:0042994	cytoplasmic sequestering of transcription factor	2018-01-03	22/17381	0.00379266	0.0247764	0.00415137	3586	1
	GO:0045109	intermediate filament organization	2018-01-03	22/17381	0.00379266	0.0247764	0.00415137	7431	1
	GO:0051043	regulation of membrane protein ectodomain proteolysis	2018-01-03	22/17381	0.00379266	0.0247764	0.00415137	3586	1
	GO:0001783	B cell apoptotic process	2018-01-03	23/17381	0.00396483	0.0247764	0.00415137	3586	1
	GO:0002861	regulation of inflammatory response to antigenic stimulus	2018-01-03	23/17381	0.00396483	0.0247764	0.00415137	3586	1
	GO:0042347	negative regulation of NF-kappaB import into nucleus	2018-01-03	23/17381	0.00396483	0.0247764	0.00415137	3586	1
	GO:0042832	defense response to protozoan	2018-01-03	23/17381	0.00396483	0.0247764	0.00415137	3586	1
	GO:1904707	positive regulation of vascular smooth muscle cell proliferation	2018-01-03	23/17381	0.00396483	0.0247764	0.00415137	3586	1
	GO:0019430	removal of superoxide radicals	2018-01-03	24/17381	0.00413697	0.0247764	0.00415137	4780	1
	GO:0032800	receptor biosynthetic process	2018-01-03	24/17381	0.00413697	0.0247764	0.00415137	3586	1
	GO:0036003	positive regulation of transcription from RNA polymerase II promoter in response to stress	2018-01-03	24/17381	0.00413697	0.0247764	0.00415137	4780	1
	GO:1990776	response to angiotensin	2018-01-03	24/17381	0.00413697	0.0247764	0.00415137	4780	1
	GO:0001562	response to protozoan	2018-01-03	25/17381	0.0043091	0.0247764	0.00415137	3586	1
	GO:0002719	negative regulation of cytokine production involved in immune response	2018-01-03	25/17381	0.0043091	0.0247764	0.00415137	3586	1
	GO:0030194	positive regulation of blood coagulation	2018-01-03	25/17381	0.0043091	0.0247764	0.00415137	4780	1
	GO:1900048	positive regulation of hemostasis	2018-01-03	25/17381	0.0043091	0.0247764	0.00415137	4780	1
	GO:1901032	negative regulation of response to reactive oxygen species	2018-01-03	25/17381	0.0043091	0.0247764	0.00415137	4780	1
	GO:1903206	negative regulation of hydrogen peroxide-induced cell death	2018-01-03	25/17381	0.0043091	0.0247764	0.00415137	4780	1
	GO:1904738	vascular associated smooth muscle cell migration	2018-01-03	25/17381	0.0043091	0.0247764	0.00415137	4780	1
	GO:1904752	regulation of vascular associated smooth muscle cell migration	2018-01-03	25/17381	0.0043091	0.0247764	0.00415137	4780	1
	GO:0032692	negative regulation of interleukin-1 production	2018-01-03	26/17381	0.00448121	0.0247764	0.00415137	3586	1
	GO:0050820	positive regulation of coagulation	2018-01-03	26/17381	0.00448121	0.0247764	0.00415137	4780	1
	GO:0060669	embryonic placenta morphogenesis	2018-01-03	26/17381	0.00448121	0.0247764	0.00415137	3586	1
	GO:0071450	cellular response to oxygen radical	2018-01-03	26/17381	0.00448121	0.0247764	0.00415137	4780	1
	GO:0071451	cellular response to superoxide	2018-01-03	26/17381	0.00448121	0.0247764	0.00415137	4780	1
	GO:0032647	regulation of interferon-alpha production	2018-01-03	27/17381	0.00465329	0.0247764	0.00415137	3586	1
	GO:2000352	negative regulation of endothelial cell apoptotic process	2018-01-03	27/17381	0.00465329	0.0247764	0.00415137	4780	1
	GO:0014002	astrocyte development	2018-01-03	28/17381	0.00482536	0.0247764	0.00415137	7431	1
	GO:0014912	negative regulation of smooth muscle cell migration	2018-01-03	28/17381	0.00482536	0.0247764	0.00415137	4780	1
	GO:0032607	interferon-alpha production	2018-01-03	28/17381	0.00482536	0.0247764	0.00415137	3586	1
	GO:0042036	negative regulation of cytokine biosynthetic process	2018-01-03	28/17381	0.00482536	0.0247764	0.00415137	3586	1
	GO:0051220	cytoplasmic sequestering of protein	2018-01-03	28/17381	0.00482536	0.0247764	0.00415137	3586	1
	GO:1901522	positive regulation of transcription from RNA polymerase II promoter involved in cellular response to chemical stimulus	2018-01-03	28/17381	0.00482536	0.0247764	0.00415137	4780	1
	GO:1903427	negative regulation of reactive oxygen species biosynthetic process	2018-01-03	28/17381	0.00482536	0.0247764	0.00415137	3586	1
	GO:1904292	regulation of ERAD pathway	2018-01-03	28/17381	0.00482536	0.0247764	0.00415137	4780	1
	GO:0000303	response to superoxide	2018-01-03	29/17381	0.00499741	0.0249403	0.00417884	4780	1
	GO:0001773	myeloid dendritic cell activation	2018-01-03	29/17381	0.00499741	0.0249403	0.00417884	3586	1
	GO:2000108	positive regulation of leukocyte apoptotic process	2018-01-03	29/17381	0.00499741	0.0249403	0.00417884	3586	1
	GO:0070306	lens fiber cell differentiation	2018-01-03	30/17381	0.00516943	0.0249506	0.00418056	7431	1
	GO:1902175	regulation of oxidative stress-induced intrinsic apoptotic signaling pathway	2018-01-03	30/17381	0.00516943	0.0249506	0.00418056	4780	1
	GO:0032689	negative regulation of interferon-gamma production	2018-01-03	31/17381	0.00534144	0.0249506	0.00418056	3586	1
	GO:0045191	regulation of isotype switching	2018-01-03	31/17381	0.00534144	0.0249506	0.00418056	3586	1
	GO:0050869	negative regulation of B cell activation	2018-01-03	31/17381	0.00534144	0.0249506	0.00418056	3586	1
	GO:0090322	regulation of superoxide metabolic process	2018-01-03	31/17381	0.00534144	0.0249506	0.00418056	4780	1
	GO:0000305	response to oxygen radical	2018-01-03	32/17381	0.00551343	0.0249506	0.00418056	4780	1
	GO:0010667	negative regulation of cardiac muscle cell apoptotic process	2018-01-03	32/17381	0.00551343	0.0249506	0.00418056	4780	1
	GO:0051930	regulation of sensory perception of pain	2018-01-03	32/17381	0.00551343	0.0249506	0.00418056	3586	1
	GO:0051931	regulation of sensory perception	2018-01-03	32/17381	0.00551343	0.0249506	0.00418056	3586	1
	GO:1903205	regulation of hydrogen peroxide-induced cell death	2018-01-03	32/17381	0.00551343	0.0249506	0.00418056	4780	1
	GO:0002701	negative regulation of production of molecular mediator of immune response	2018-01-03	34/17381	0.00585734	0.0260652	0.00436732	3586	1
	GO:0036474	cell death in response to hydrogen peroxide	2018-01-03	34/17381	0.00585734	0.0260652	0.00436732	4780	1
	GO:0010664	negative regulation of striated muscle cell apoptotic process	2018-01-03	35/17381	0.00602927	0.0263815	0.00442032	4780	1
	GO:0097421	liver regeneration	2018-01-03	35/17381	0.00602927	0.0263815	0.00442032	3586	1
[truncated: 7,433 more rows]

## Sheet: Conserved LncmiRSRN modules
Module ID	#Genes	#Sponge lncRNAs	#mRNAs	Shared miRNAs	Gene list
1	5	2	3	hsa-miR-122-5p, hsa-miR-125b-5p, hsa-miR-129-2-3p, hsa-miR-133b, hsa-miR-148a-3p, hsa-miR-149-5p, hsa-miR-15a-5p, hsa-miR-16-5p, hsa-miR-195-5p, hsa-miR-204-5p, hsa-miR-221-3p, hsa-miR-22-3p, hsa-miR-301a-3p, hsa-miR-339-5p	DHRS4-AS1	RP4-614O4.11	BBC3	MAOA	BCL2L2
2	11	2	9	hsa-let-7c-5p, hsa-miR-106a-5p, hsa-miR-124-3p, hsa-miR-125b-5p, hsa-miR-138-5p, hsa-miR-146a-5p, hsa-miR-150-5p, hsa-miR-17-5p, hsa-miR-181b-5p, hsa-miR-19a-3p, hsa-miR-19b-3p, hsa-miR-20a-5p, hsa-miR-20b-5p, hsa-miR-216a-5p, hsa-miR-29a-3p, hsa-miR-29b-3p, hsa-miR-30a-5p, hsa-miR-31-5p, hsa-miR-382-5p, hsa-miR-7-5p, hsa-miR-92a-3p, hsa-miR-9-3p, hsa-miR-9-5p, hsa-miR-98-5p	FTX	RP11-265N6.1	CUL5	PKNOX1	NUMB	TET1	MXD1	HIPK3	CBX7	CBL	ABL1
3	10	3	7	hsa-miR-101-3p, hsa-miR-101-5p, hsa-miR-122-5p, hsa-miR-1271-5p, hsa-miR-155-5p, hsa-miR-199a-3p, hsa-miR-200a-3p, hsa-miR-210-3p, hsa-miR-21-5p, hsa-miR-221-3p, hsa-miR-223-3p, hsa-miR-23b-3p, hsa-miR-27a-3p, hsa-miR-27b-3p, hsa-miR-29a-3p, hsa-miR-29b-3p, hsa-miR-29c-3p, hsa-miR-31-5p, hsa-miR-340-5p, hsa-miR-34a-5p, hsa-miR-376a-3p, hsa-miR-376b-3p, hsa-miR-494-3p, hsa-miR-543, hsa-miR-93-3p, …	DANCR	GAS5	LINC00662	STMN1	TFAM	HMGCR	FBXO11	CCNG2	CCNG1	ATG4C
4	8	4	4	hsa-miR-136-5p, hsa-miR-145-5p, hsa-miR-17-5p, hsa-miR-199b-5p, hsa-miR-205-5p, hsa-miR-23b-3p, hsa-miR-26b-5p, hsa-miR-29a-3p, hsa-miR-30b-5p, hsa-miR-30c-5p, hsa-miR-502-3p, hsa-miR-519a-3p	AC083843.1	FAM66C	GABPB1-AS1	HNRNPU-AS1	YES1	TRAF5	SET	RASAL2
5	6	2	4	hsa-miR-132-3p, hsa-miR-143-3p, hsa-miR-145-5p, hsa-miR-148b-3p, hsa-miR-17-5p, hsa-miR-185-5p, hsa-miR-221-3p, hsa-miR-25-3p, hsa-miR-26a-5p, hsa-miR-30a-3p, hsa-miR-320a, hsa-miR-455-3p, hsa-miR-7-5p, hsa-miR-92a-3p	LINC00641	PWAR6	MDM2	PIK3R3	NFATC3	HDAC2
6	10	3	7	hsa-let-7a-5p, hsa-miR-100-5p, hsa-miR-106a-5p, hsa-miR-106b-5p, hsa-miR-124-3p, hsa-miR-125a-5p, hsa-miR-132-3p, hsa-miR-135a-5p, hsa-miR-1-3p, hsa-miR-143-3p, hsa-miR-145-5p, hsa-miR-146b-5p, hsa-miR-151a-5p, hsa-miR-15a-5p, hsa-miR-16-5p, hsa-miR-17-3p, hsa-miR-17-5p, hsa-miR-181a-5p, hsa-miR-182-5p, hsa-miR-18a-5p, hsa-miR-18b-5p, hsa-miR-199a-5p, hsa-miR-19a-5p, hsa-miR-19b-3p, hsa-miR-20a-5…	MEG3	PDXDC2P	RP11-6O2.4	CTGF	PIM1	TIMP1	SMARCA5	GPR78	FBN1	CDKN1A
7	5	2	3	hsa-miR-103a-3p, hsa-miR-141-3p, hsa-miR-155-5p, hsa-miR-17-5p, hsa-miR-200c-3p, hsa-miR-20a-5p, hsa-miR-221-3p, hsa-miR-222-3p, hsa-miR-302a-3p, hsa-miR-302b-3p, hsa-miR-302d-3p, hsa-miR-372-3p	CASP8AP2	MIR17HG	CDK2	MAP3K1	SSX2IP
8	6	2	4	hsa-let-7d-5p, hsa-miR-106a-5p, hsa-miR-106b-5p, hsa-miR-124-3p, hsa-miR-143-3p, hsa-miR-144-3p, hsa-miR-17-5p, hsa-miR-185-5p, hsa-miR-199a-3p, hsa-miR-199b-3p, hsa-miR-205-5p, hsa-miR-20a-5p, hsa-miR-22-3p, hsa-miR-320a, hsa-miR-34a-5p, hsa-miR-96-5p	EMX2OS	RP11-173P15.3	AR	APP	PAK4	SCARB1
9	7	2	5	hsa-miR-106b-5p, hsa-miR-125a-5p, hsa-miR-125b-5p, hsa-miR-145-5p, hsa-miR-183-5p, hsa-miR-186-5p, hsa-miR-199a-5p, hsa-miR-199b-5p, hsa-miR-29a-3p, hsa-miR-29b-3p, hsa-miR-29c-3p, hsa-miR-7-5p, hsa-miR-9-5p	RP11-77H9.2	RP13-516M14.1	PPP1R13B	LRP6	SETD2	ABCC1	ERBB3
10	4	2	2	hsa-miR-140-5p, hsa-miR-200b-3p, hsa-miR-200c-3p, hsa-miR-296-5p, hsa-miR-429, hsa-miR-874-3p	RP11-386G11.10	SNHG17	PIN1	ELMO2
11	40	14	26	hsa-let-7b-5p, hsa-let-7g-5p, hsa-miR-101-3p, hsa-miR-101-5p, hsa-miR-103a-3p, hsa-miR-106b-5p, hsa-miR-107, hsa-miR-10a-5p, hsa-miR-10b-5p, hsa-miR-122-5p, hsa-miR-124-3p, hsa-miR-125a-5p, hsa-miR-125b-5p, hsa-miR-128-3p, hsa-miR-129-5p, hsa-miR-130b-3p, hsa-miR-132-3p, hsa-miR-135a-5p, hsa-miR-137, hsa-miR-138-5p, hsa-miR-1-3p, hsa-miR-140-3p, hsa-miR-140-5p, hsa-miR-141-3p, hsa-miR-142-3p, hsa…	AC000120.7	AC005562.1	AC009120.6	CTB-89H12.4	ENTPD1-AS1	GS1-124K5.11	LINC00894	NBPF1	PCBP1-AS1	PSMD5-AS1	RP11-179B15.5	RP11-439E19.10	RP4-773N10.4	TUG1	RASA1	NOTCH2	NCOA3	KDM5B	RDX	PELI1	PHLPP1	SRSF1	FLT1	SOX9	PTK2	LDHB	TIMP3	MAPK14	COL1A2	TP53INP1	KLF5	YY1	ITGA6	SRC	SMAD1	FMR1	CRKL	CPEB4	COL4A2	ADAM17
12	5	3	2	hsa-let-7a-5p, hsa-let-7b-5p, hsa-let-7e-5p, hsa-miR-141-3p, hsa-miR-145-5p, hsa-miR-152-3p, hsa-miR-181b-5p, hsa-miR-185-5p, hsa-miR-214-5p, hsa-miR-320a, hsa-miR-7-5p, hsa-miR-9-5p	KB-1460A1.5	RP11-452L6.1	RP11-66B24.4	IGF1R	ELAVL1
13	5	3	2	hsa-miR-106b-5p, hsa-miR-130a-3p, hsa-miR-148a-3p, hsa-miR-148b-3p, hsa-miR-17-5p, hsa-miR-20a-5p, hsa-miR-214-3p, hsa-miR-25-3p, hsa-miR-301a-3p, hsa-miR-301b-3p, hsa-miR-32-5p, hsa-miR-363-3p, hsa-miR-92a-3p	LOC648987	PSMD6-AS2	RP11-98I9.4	BCL2L11	ROCK1
14	9	7	2	hsa-let-7a-5p, hsa-let-7b-5p, hsa-let-7c-5p, hsa-let-7d-5p, hsa-let-7e-5p, hsa-let-7f-5p, hsa-miR-107, hsa-miR-1-3p, hsa-miR-370-3p, hsa-miR-98-5p	AC004593.3	LINC00355	LINC01102	LINC01277	RP11-263K19.4	RP11-30K9.5	RP11-446J8.1	MPL	LIN28A
15	4	2	2	hsa-miR-15a-5p, hsa-miR-15b-5p, hsa-miR-16-5p, hsa-miR-195-5p, hsa-miR-27a-3p	KLF3-AS1	LINC01252	PURA	YAP1
16	6	4	2	hsa-miR-29a-3p, hsa-miR-29b-3p, hsa-miR-29c-3p	AC113331.9	CCDC183-AS1	CTD-2116N17.1	SLC37A4	DNMT3B	NASP
17	5	3	2	hsa-let-7a-5p, hsa-let-7c-5p, hsa-let-7d-5p, hsa-miR-103a-3p, hsa-miR-107, hsa-miR-126-5p, hsa-miR-195-5p, hsa-miR-23b-3p, hsa-miR-497-5p, hsa-miR-9-5p	MEG8	RP4-601P9.1	RP5-1142A6.9	DICER1	ETS1
18	7	5	2	hsa-let-7a-5p, hsa-miR-106a-5p, hsa-miR-139-5p, hsa-miR-143-3p, hsa-miR-148a-3p, hsa-miR-148b-3p, hsa-miR-152-3p, hsa-miR-17-5p, hsa-miR-20a-5p, hsa-miR-20b-5p	AC007879.2	CTD-2530N21.4	RP11-286B14.1	RP11-539L10.2	RP4-781K5.2	WNT1	LIMK1
19	5	3	2	hsa-miR-15a-5p, hsa-miR-15b-5p, hsa-miR-16-5p, hsa-miR-195-5p, hsa-miR-424-5p, hsa-miR-497-5p	AC009948.5	ACVR2B-AS1	RP5-991G20.1	CHEK1	CDC25A
20	6	4	2	hsa-miR-126-5p, hsa-miR-15a-5p, hsa-miR-15b-5p, hsa-miR-16-5p, hsa-miR-17-5p, hsa-miR-195-5p, hsa-miR-200c-3p, hsa-miR-20b-5p, hsa-miR-217, hsa-miR-22-3p, hsa-miR-23b-3p, hsa-miR-27b-3p, hsa-miR-320a, hsa-miR-361-5p, hsa-miR-93-5p	GUSBP1	LINC01433	RP11-148B6.1	RP11-582J16.4	VEGFA	MTDH
21	6	4	2	hsa-miR-124-3p, hsa-miR-1-3p, hsa-miR-182-5p, hsa-miR-195-5p, hsa-miR-200b-3p, hsa-miR-200c-3p, hsa-miR-206, hsa-miR-24-3p, hsa-miR-302a-3p, hsa-miR-34b-5p, hsa-miR-34c-5p, hsa-miR-377-3p, hsa-miR-429, hsa-miR-449b-5p, hsa-miR-497-5p, hsa-miR-506-3p, hsa-miR-613	ARHGAP5-AS1	RP11-119K6.6	RP11-611O2.5	ZBED5-AS1	CDK4	DLC1
22	4	2	2	hsa-miR-15a-5p, hsa-miR-15b-5p, hsa-miR-16-5p, hsa-miR-195-5p, hsa-miR-497-5p	RP11-414J4.2	SH3BP5-AS1	TAB3	ACTB
23	5	3	2	hsa-miR-106b-5p, hsa-miR-17-5p, hsa-miR-181a-5p, hsa-miR-181b-5p, hsa-miR-181c-5p, hsa-miR-181d-5p, hsa-miR-20a-5p, hsa-miR-28-5p, hsa-miR-518b	NKAPP1	PRIM2	SBF2-AS1	RBL1	RAP1B
24	4	2	2	hsa-miR-103a-3p, hsa-miR-107, hsa-miR-29a-3p, hsa-miR-29b-3p, hsa-miR-29c-3p, hsa-miR-34a-5p, hsa-miR-34b-3p, hsa-miR-34c-3p, hsa-miR-375, hsa-miR-449a	CKMT2-AS1	MIR4458HG	MYCN	AXIN2
25	4	2	2	hsa-miR-1269a, hsa-miR-132-3p, hsa-miR-1-3p, hsa-miR-204-5p, hsa-miR-211-5p	DCTN1-AS1	RP11-395G23.3	IL11	SOX6
26	5	3	2	hsa-let-7a-5p, hsa-let-7b-5p, hsa-let-7c-5p, hsa-let-7d-5p, hsa-let-7e-5p, hsa-let-7g-5p, hsa-miR-145-5p, hsa-miR-148b-3p, hsa-miR-26a-5p, hsa-miR-98-5p	JPX	RP11-44F21.5	UBXN8	TNFRSF10B	NRAS
27	4	2	2	hsa-miR-129-5p, hsa-miR-204-5p, hsa-miR-211-5p, hsa-miR-214-5p, hsa-miR-34a-5p, hsa-miR-34c-5p, hsa-miR-377-3p, hsa-miR-491-5p	RP11-248G5.8	RP11-513I15.6	SOX4	CDK6
28	4	2	2	hsa-miR-137, hsa-miR-141-3p, hsa-miR-142-5p, hsa-miR-145-5p, hsa-miR-200a-3p, hsa-miR-20a-5p, hsa-miR-21-5p, hsa-miR-218-5p	LINC00882	MIR99AHG	TGFB2	KIT
29	4	2	2	hsa-let-7a-5p, hsa-let-7g-5p, hsa-miR-26a-5p, hsa-miR-26b-5p, hsa-miR-30c-5p, hsa-miR-30d-5p, hsa-miR-30e-5p	LINC01091	RP11-488L18.10	CASP3	RB1

## Sheet: Enriched terms in conserved
	Significant GO terms											Significant KEGG terms
	ID	Description	GeneRatio	BgRatio	pvalue	p.adjust	qvalue	geneID	Count			ID	Description	GeneRatio	BgRatio	pvalue	p.adjust	qvalue	geneID	Count
Module 1	GO:0097193	intrinsic apoptotic signaling pathway	2018-02-03	292/17381	0.000834477	0.0185009	0.0019974	27113/599	2		Module 1	hsa00360	Phenylalanine metabolism	2018-01-03	17/7322	0.0069501	0.0478423	0.0167868	4128	1
	GO:2001233	regulation of apoptotic signaling pathway	2018-02-03	383/17381	0.00143174	0.0185009	0.0019974	27113/599	2			hsa00340	Histidine metabolism	2018-01-03	23/7322	0.00939536	0.0478423	0.0167868	4128	1
	GO:0019336	phenol-containing compound catabolic process	2018-01-03	10/17381	0.00172513	0.0185009	0.0019974	4128	1			hsa04215	Apoptosis - multiple species	2018-01-03	33/7322	0.0134619	0.0478423	0.0167868	27113	1
	GO:0042135	neurotransmitter catabolic process	2018-01-03	11/17381	0.00189753	0.0185009	0.0019974	4128	1			hsa00350	Tyrosine metabolism	2018-01-03	36/7322	0.0146797	0.0478423	0.0167868	4128	1
	GO:0090200	positive regulation of release of cytochrome c from mitochondria	2018-01-03	29/17381	0.00499741	0.0317342	0.0034261	27113	1			hsa00260	Glycine, serine and threonine metabolism	2018-01-03	40/7322	0.0163018	0.0478423	0.0167868	4128	1
	GO:0042133	neurotransmitter metabolic process	2018-01-03	30/17381	0.00516943	0.0317342	0.0034261	4128	1			hsa00380	Tryptophan metabolism	2018-01-03	40/7322	0.0163018	0.0478423	0.0167868	4128	1
	GO:0042417	dopamine metabolic process	2018-01-03	37/17381	0.00637306	0.0317342	0.0034261	4128	1			hsa05030	Cocaine addiction	2018-01-03	49/7322	0.0199451	0.0478423	0.0167868	4128	1
	GO:0090199	regulation of release of cytochrome c from mitochondria	2018-01-03	45/17381	0.00774745	0.0317342	0.0034261	27113	1			hsa00330	Arginine and proline metabolism	2018-01-03	50/7322	0.0203494	0.0478423	0.0167868	4128	1
	GO:0006576	cellular biogenic amine metabolic process	2018-01-03	53/17381	0.00912058	0.0317342	0.0034261	4128	1			hsa04115	p53 signaling pathway	2018-01-03	68/7322	0.027607	0.0478423	0.0167868	27113	1
	GO:0006584	catecholamine metabolic process	2018-01-03	53/17381	0.00912058	0.0317342	0.0034261	4128	1			hsa05031	Amphetamine addiction	2018-01-03	68/7322	0.027607	0.0478423	0.0167868	4128	1
	GO:0009712	catechol-containing compound metabolic process	2018-01-03	53/17381	0.00912058	0.0317342	0.0034261	4128	1			hsa00982	Drug metabolism - cytochrome P450	2018-01-03	70/7322	0.0284112	0.0478423	0.0167868	4128	1
	GO:0001836	release of cytochrome c from mitochondria	2018-01-03	57/17381	0.00980666	0.0317342	0.0034261	27113	1			hsa05210	Colorectal cancer	2018-01-03	72/7322	0.029215	0.0478423	0.0167868	27113	1
	GO:1901616	organic hydroxy compound catabolic process	2018-01-03	63/17381	0.0108352	0.0317342	0.0034261	4128	1			hsa01524	Platinum drug resistance	2018-01-03	73/7322	0.0296167	0.0478423	0.0167868	27113	1
	GO:0038034	signal transduction in absence of ligand	2018-01-03	71/17381	0.0122055	0.0317342	0.0034261	599	1		Module 2	hsa05220	Chronic myeloid leukemia	2018-02-05	78/7322	0.00109734	0.011994	0.00771541	867/25	2
	GO:0097192	extrinsic apoptotic signaling pathway in absence of ligand	2018-01-03	71/17381	0.0122055	0.0317342	0.0034261	599	1			hsa04012	ErbB signaling pathway	2018-02-05	86/7322	0.00133266	0.011994	0.00771541	867/25	2
	GO:2001243	negative regulation of intrinsic apoptotic signaling pathway	2018-01-03	95/17381	0.0163087	0.0378057	0.00408159	599	1			hsa04120	Ubiquitin mediated proteolysis	2018-02-05	137/7322	0.00334938	0.0200963	0.0129274	8065/867	2
	GO:0018958	phenol-containing compound metabolic process	2018-01-03	96/17381	0.0164794	0.0378057	0.00408159	4128	1		Module 3	hsa04115	p53 signaling pathway	2018-02-06	68/7322	0.00124455	0.01369	0.00917035	901/900	2
	GO:0008630	intrinsic apoptotic signaling pathway in response to DNA damage	2018-01-03	102/17381	0.0175033	0.0379239	0.00409434	599	1		Module 5	hsa05220	Chronic myeloid leukemia	2018-03-04	78/7322	4.6174e-06	0.000457122	0.000252742	4193/8503/3066	3
	GO:0008637	apoptotic mitochondrial changes	2018-01-03	125/17381	0.0214217	0.0406474	0.00438839	27113	1			hsa04919	Thyroid hormone signaling pathway	2018-03-04	116/7322	1.53233e-05	0.000758501	0.000419373	4193/8503/3066	3
	GO:0044106	cellular amine metabolic process	2018-01-03	125/17381	0.0214217	0.0406474	0.00438839	4128	1			hsa04218	Cellular senescence	2018-03-04	160/7322	4.03162e-05	0.00133043	0.000735593	4193/8503/4775	3
	GO:0009308	amine metabolic process	2018-01-03	134/17381	0.0229522	0.0406474	0.00438839	4128	1			hsa05203	Viral carcinogenesis	2018-03-04	201/7322	7.98961e-05	0.00162954	0.000900967	4193/8503/3066	3
	GO:0008584	male gonad development	2018-01-03	139/17381	0.0238017	0.0406474	0.00438839	599	1			hsa05169	Epstein-Barr virus infection	2018-03-04	203/7322	8.22999e-05	0.00162954	0.000900967	4193/8503/3066	3
	GO:0046546	development of primary male sexual characteristics	2018-01-03	140/17381	0.0239716	0.0406474	0.00438839	599	1			hsa05165	Human papillomavirus infection	2018-03-04	319/7322	0.000317198	0.00523376	0.00289373	4193/8503/3066	3
	GO:2001242	regulation of intrinsic apoptotic signaling pathway	2018-01-03	159/17381	0.027195	0.0430651	0.00464941	599	1			hsa04213	Longevity regulating pathway - multiple species	2018-02-04	62/7322	0.000418711	0.00566496	0.00313214	8503/3066	2
	GO:0046661	male sex differentiation	2018-01-03	162/17381	0.0277033	0.0430651	0.00464941	599	1			hsa04662	B cell receptor signaling pathway	2018-02-04	71/7322	0.000549331	0.00566496	0.00313214	8503/4775	2
	GO:0010822	positive regulation of mitochondrion organization	2018-01-03	170/17381	0.029058	0.0430651	0.00464941	27113	1			hsa05214	Glioma	2018-02-04	71/7322	0.000549331	0.00566496	0.00313214	4193/8503	2
	GO:2001235	positive regulation of apoptotic signaling pathway	2018-01-03	177/17381	0.0302423	0.0430651	0.00464941	27113	1			hsa01524	Platinum drug resistance	2018-02-04	73/7322	0.000580729	0.00566496	0.00313214	4193/8503	2
	GO:0001505	regulation of neurotransmitter levels	2018-01-03	181/17381	0.0309186	0.0430651	0.00464941	4128	1			hsa05218	Melanoma	2018-02-04	76/7322	0.00062944	0.00566496	0.00313214	4193/8503	2
	GO:0097164	ammonium ion metabolic process	2018-01-03	195/17381	0.0332831	0.0441678	0.00476846	4128	1			hsa01522	Endocrine resistance	2018-02-04	96/7322	0.00100342	0.00780085	0.00431307	4193/8503	2
	GO:2001234	negative regulation of apoptotic signaling pathway	2018-01-03	211/17381	0.0359808	0.0441678	0.00476846	599	1			hsa05215	Prostate cancer	2018-02-04	97/7322	0.00102435	0.00780085	0.00431307	4193/8503	2
	GO:0008406	gonad development	2018-01-03	218/17381	0.0371594	0.0441678	0.00476846	599	1			hsa04660	T cell receptor signaling pathway	2018-02-04	103/7322	0.00115443	0.00816344	0.00451354	8503/4775	2
	GO:0097191	extrinsic apoptotic signaling pathway	2018-01-03	218/17381	0.0371594	0.0441678	0.00476846	599	1			hsa04110	Cell cycle	2018-02-04	124/7322	0.00166947	0.0110185	0.00609211	4193/3066	2
	GO:0045137	development of primary sexual characteristics	2018-01-03	224/17381	0.0381689	0.0441678	0.00476846	599	1			hsa04068	FoxO signaling pathway	2018-02-04	132/7322	0.00188999	0.0116943	0.00646574	4193/8503	2
	GO:0010821	regulation of mitochondrion organization	2018-01-03	226/17381	0.0385053	0.0441678	0.00476846	27113	1			hsa05161	Hepatitis B	2018-02-04	144/7322	0.0022457	0.0130779	0.00723074	8503/4775	2
Module 2	GO:0038127	ERBB signaling pathway	2018-03-09	152/17381	5.29965e-05	0.030367	0.0181304	8065/867/25	3			hsa04360	Axon guidance	2018-02-04	175/7322	0.00330185	0.0181602	0.0100407	8503/4775	2
	GO:1905332	positive regulation of morphogenesis of an epithelium	2018-02-09	34/17381	0.000132568	0.0379807	0.0226761	8650/25	2			hsa05167	Kaposi's sarcoma-associated herpesvirus infection	2018-02-04	186/7322	0.00372368	0.0184322	0.0101911	8503/4775	2
	GO:0006469	negative regulation of protein kinase activity	2018-03-09	255/17381	0.000245572	0.0429972	0.0256711	10114/867/25	3			hsa05202	Transcriptional misregulation in cancer	2018-02-04	186/7322	0.00372368	0.0184322	0.0101911	4193/3066	2
	GO:0033673	negative regulation of kinase activity	2018-03-09	273/17381	0.000300155	0.0429972	0.0256711	10114/867/25	3			hsa05205	Proteoglycans in cancer	2018-02-04	203/7322	0.00442353	0.0208538	0.01153	4193/8503	2
Module 5	GO:0042220	response to cocaine	2018-02-04	52/17381	5.24726e-05	0.0212514	0.00568914	4193/3066	2			hsa05166	HTLV-I infection	2018-02-04	255/7322	0.00692	0.03114	0.0172172	8503/4775	2
	GO:0070301	cellular response to hydrogen peroxide	2018-02-04	91/17381	0.000161563	0.0236526	0.00633195	4193/3066	2		Module 6	hsa04066	HIF-1 signaling pathway	2018-02-04	100/7322	0.00108844	0.0446259	0.0252059	7076/1026	2
	GO:0043279	response to alkaloid	2018-02-04	108/17381	0.000227665	0.0236526	0.00633195	4193/3066	2		Module 7	hsa05161	Hepatitis B	2018-02-03	144/7322	0.00113754	0.0273009	0.0155663	1017/4214	2
	GO:0060359	response to ammonium ion	2018-02-04	124/17381	0.00030011	0.0236526	0.00633195	4193/3066	2		Module 10	hsa05131	Shigellosis	2018-01-02	65/7322	0.0176771	0.020653	NA	63916	1
	GO:0010977	negative regulation of neuron projection development	2018-02-04	128/17381	0.000319767	0.0236526	0.00633195	4193/3066	2			hsa04622	RIG-I-like receptor signaling pathway	2018-01-02	70/7322	0.0190304	0.020653	NA	5300	1
	GO:0042542	response to hydrogen peroxide	2018-02-04	134/17381	0.000350409	0.0236526	0.00633195	4193/3066	2			hsa05100	Bacterial invasion of epithelial cells	2018-01-02	76/7322	0.020653	0.020653	NA	63916	1
	GO:0031345	negative regulation of cell projection organization	2018-02-04	153/17381	0.000456581	0.0243354	0.00651473	4193/3066	2		Module 11	hsa04510	Focal adhesion	2018-07-22	199/7322	1.18913e-06	0.000120102	8.13614e-05	2321/5747/1278/3655/6714/1399/1284	7
	GO:0034614	cellular response to reactive oxygen species	2018-02-04	157/17381	0.000480699	0.0243354	0.00651473	4193/3066	2			hsa01522	Endocrine resistance	2018-05-22	96/7322	7.70111e-06	0.000388906	0.000263459	4853/8202/5747/1432/6714	5
	GO:1901796	regulation of signal transduction by p53 class mediator	2018-02-04	176/17381	0.000603619	0.0271628	0.00727166	4193/3066	2			hsa05205	Proteoglycans in cancer	2018-05-22	203/7322	0.000279419	0.00862926	0.00584578	5962/5747/7078/1432/6714	5
	GO:0045665	negative regulation of neuron differentiation	2018-02-04	193/17381	0.000725272	0.0293735	0.00786347	4193/3066	2			hsa04810	Regulation of actin cytoskeleton	2018-05-22	212/7322	0.000341753	0.00862926	0.00584578	5962/5747/3655/6714/1399	5
	GO:0000302	response to reactive oxygen species	2018-02-04	219/17381	0.000932546	0.0316884	0.00848318	4193/3066	2			hsa04151	PI3K-Akt signaling pathway	2018-06-22	351/7322	0.000450974	0.00910967	0.00617122	23239/2321/5747/1278/3655/1284	6
	GO:0060485	mesenchyme development	2018-02-04	246/17381	0.0011748	0.0316884	0.00848318	4193/3066	2			hsa04926	Relaxin signaling pathway	2018-04-22	130/7322	0.000541523	0.00911564	0.00617527	1432/1278/6714/1284	4
	GO:0050768	negative regulation of neurogenesis	2018-02-04	247/17381	0.0011843	0.0316884	0.00848318	4193/3066	2			hsa04370	VEGF signaling pathway	2018-03-22	59/7322	0.00068643	0.0099042	0.00670946	5747/1432/6714	3
	GO:0051961	negative regulation of nervous system development	2018-02-04	267/17381	0.00138213	0.0316884	0.00848318	4193/3066	2			hsa05131	Shigellosis	2018-03-22	65/7322	0.000911599	0.0115089	0.00779657	1432/6714/1399	3
	GO:0072331	signal transduction by p53 class mediator	2018-02-04	270/17381	0.0014131	0.0316884	0.00848318	4193/3066	2			hsa05120	Epithelial cell signaling in Helicobacter pylori infection	2018-03-22	68/7322	0.00103983	0.0116692	0.00790514	1432/6714/6868	3
	GO:0034599	cellular response to oxidative stress	2018-02-04	283/17381	0.00155115	0.0316884	0.00848318	4193/3066	2			hsa05100	Bacterial invasion of epithelial cells	2018-03-22	76/7322	0.00143609	0.0145045	0.00982587	5747/6714/1399	3
	GO:0010721	negative regulation of cell development	2018-02-04	288/17381	0.00160593	0.0316884	0.00848318	4193/3066	2			hsa04512	ECM-receptor interaction	2018-03-22	82/7322	0.00178811	0.0164181	0.0111222	1278/3655/1284	3
	GO:0071375	cellular response to peptide hormone stimulus	2018-02-04	303/17381	0.00177581	0.0316884	0.00848318	4193/8503	2			hsa04012	ErbB signaling pathway	2018-03-22	86/7322	0.00205033	0.0168621	0.011423	5747/6714/1399	3
	GO:1901653	cellular response to peptide	2018-02-04	345/17381	0.00229567	0.0316884	0.00848318	4193/8503	2			hsa05165	Human papillomavirus infection	2018-05-22	319/7322	0.00217036	0.0168621	0.011423	4853/5747/1278/3655/1284	5
	GO:0010870	positive regulation of receptor biosynthetic process	2018-01-04	11/17381	0.00252932	0.0316884	0.00848318	3066	1			hsa05222	Small cell lung cancer	2018-03-22	93/7322	0.00256465	0.0185021	0.012534	5747/3655/1284	3
	GO:0045472	response to ether	2018-01-04	11/17381	0.00252932	0.0316884	0.00848318	4193	1			hsa05146	Amoebiasis	2018-03-22	96/7322	0.0028074	0.0189032	0.0128057	5747/1278/1284	3
	GO:1902894	negative regulation of pri-miRNA transcription from RNA polymerase II promoter	2018-01-04	11/17381	0.00252932	0.0316884	0.00848318	4775	1			hsa04933	AGE-RAGE signaling pathway in diabetic complications	2018-03-22	99/7322	0.00306395	0.0190373	0.0128966	1432/1278/1284	3
	GO:0070482	response to oxygen levels	2018-02-04	371/17381	0.00264991	0.0316884	0.00848318	4193/3066	2			hsa04015	Rap1 signaling pathway	2018-04-22	210/7322	0.0032043	0.0190373	0.0128966	2321/1432/6714/1399	4
	GO:0045346	regulation of MHC class II biosynthetic process	2018-01-04	12/17381	0.00275902	0.0316884	0.00848318	3066	1			hsa04919	Thyroid hormone signaling pathway	2018-03-22	116/7322	0.00479028	0.0268788	0.0182086	4853/8202/6714	3
	GO:0018205	peptidyl-lysine modification	2018-02-04	381/17381	0.00279271	0.0316884	0.00848318	4193/3066	2			hsa04611	Platelet activation	2018-03-22	123/7322	0.00564214	0.0299924	0.020318	1432/1278/6714	3
	GO:0045862	positive regulation of proteolysis	2018-02-04	393/17381	0.00296887	0.0316884	0.00848318	4193/3066	2			hsa05418	Fluid shear stress and atherosclerosis	2018-03-22	139/7322	0.00791614	0.0399765	0.0270815	5747/1432/6714	3
	GO:0010225	response to UV-C	2018-01-04	13/17381	0.00298868	0.0316884	0.00848318	4193	1			hsa04330	Notch signaling pathway	2018-02-22	48/7322	0.00894199	0.0430067	0.0291343	4853/6868	2
	GO:0043518	negative regulation of DNA damage response, signal transduction by p53 class mediator	2018-01-04	13/17381	0.00298868	0.0316884	0.00848318	4193	1			hsa04010	MAPK signaling pathway	2018-04-22	294/7322	0.0105085	0.0482437	0.032682	5921/2321/1432/1399	4
	GO:0045342	MHC class II biosynthetic process	2018-01-04	13/17381	0.00298868	0.0316884	0.00848318	3066	1			hsa05206	MicroRNAs in cancer	2018-04-22	299/7322	0.0111348	0.0488961	0.033124	4853/5962/7078/1399	4
	GO:0061000	negative regulation of dendritic spine development	2018-01-04	13/17381	0.00298868	0.0316884	0.00848318	3066	1		Module 12	hsa04152	AMPK signaling pathway	2018-02-02	121/7322	0.000270873	0.00785533	0.00228104	3480/1994	2
	GO:0061029	eyelid development in camera-type eye	2018-01-04	13/17381	0.00298868	0.0316884	0.00848318	3066	1		Module 13	hsa05206	MicroRNAs in cancer	2018-02-02	299/7322	0.00166222	0.0415554	0.0087485	10018/6093	2
	GO:0071391	cellular response to estrogen stimulus	2018-01-04	13/17381	0.00298868	0.0316884	0.00848318	4193	1		Module 14	hsa04630	Jak-STAT signaling pathway	2018-01-01	162/7322	0.0221251	0.0368752	NA	4352	1
	GO:1903350	response to dopamine	2018-01-04	14/17381	0.0032183	0.0316884	0.00848318	3066	1			hsa04060	Cytokine-cytokine receptor interaction	2018-01-01	270/7322	0.0368752	0.0368752	NA	4352	1
	GO:1903351	cellular response to dopamine	2018-01-04	14/17381	0.0032183	0.0316884	0.00848318	3066	1		Module 15	hsa04392	Hippo signaling pathway - multiple species	2018-01-01	29/7322	0.00396067	0.00792133	NA	10413	1
	GO:0043434	response to peptide hormone	2018-02-04	410/17381	0.00322735	0.0316884	0.00848318	4193/8503	2			hsa04390	Hippo signaling pathway	2018-01-01	154/7322	0.0210325	0.0210325	NA	10413	1
	GO:0042493	response to drug	2018-02-04	411/17381	0.00324287	0.0316884	0.00848318	4193/3066	2		Module 16	hsa04973	Carbohydrate digestion and absorption	2018-01-02	44/7322	0.0119833	0.0183822	0.00644989	2542	1
	GO:0048149	behavioral response to ethanol	2018-01-04	15/17381	0.00344788	0.0316884	0.00848318	3066	1			hsa00270	Cysteine and methionine metabolism	2018-01-02	45/7322	0.0122548	0.0183822	0.00644989	1789	1
	GO:0060788	ectodermal placode formation	2018-01-04	15/17381	0.00344788	0.0316884	0.00848318	3066	1		Module 19	hsa04110	Cell cycle	2018-02-02	124/7322	0.000284529	0.00166106	0.00074935	1111/993	2
	GO:0071697	ectodermal placode morphogenesis	2018-01-04	15/17381	0.00344788	0.0316884	0.00848318	3066	1			hsa04218	Cellular senescence	2018-02-02	160/7322	0.000474588	0.00166106	0.00074935	1111/993	2
	GO:1904754	positive regulation of vascular associated smooth muscle cell migration	2018-01-04	15/17381	0.00344788	0.0316884	0.00848318	4193	1			hsa04115	p53 signaling pathway	2018-01-02	68/7322	0.0184892	0.0431414	0.0194623	1111	1
	GO:1990000	amyloid fibril formation	2018-01-04	15/17381	0.00344788	0.0316884	0.00848318	4193	1			hsa04914	Progesterone-mediated oocyte maturation	2018-01-02	99/7322	0.0268608	0.0470064	0.0212059	993	1
	GO:2001275	positive regulation of glucose import in response to insulin stimulus	2018-01-04	15/17381	0.00344788	0.0316884	0.00848318	8503	1		Module 20	hsa05219	Bladder cancer	2018-01-01	41/7322	0.00559956	0.0341437	NA	7422	1
	GO:0010975	regulation of neuron projection development	2018-02-04	425/17381	0.00346407	0.0316884	0.00848318	4193/3066	2			hsa04370	VEGF signaling pathway	2018-01-01	59/7322	0.00805791	0.0341437	NA	7422	1
	GO:0006979	response to oxidative stress	2018-02-04	426/17381	0.00348014	0.0316884	0.00848318	4193/3066	2			hsa05211	Renal cell carcinoma	2018-01-01	69/7322	0.00942365	0.0341437	NA	7422	1
	GO:0031000	response to caffeine	2018-01-04	16/17381	0.00367742	0.0316884	0.00848318	3066	1			hsa05212	Pancreatic cancer	2018-01-01	75/7322	0.0102431	0.0341437	NA	7422	1
	GO:0071236	cellular response to antibiotic	2018-01-04	16/17381	0.00367742	0.0316884	0.00848318	4193	1			hsa01521	EGFR tyrosine kinase inhibitor resistance	2018-01-01	79/7322	0.0107894	0.0341437	NA	7422	1
	GO:0071696	ectodermal placode development	2018-01-04	16/17381	0.00367742	0.0316884	0.00848318	3066	1			hsa05323	Rheumatoid arthritis	2018-01-01	90/7322	0.0122917	0.0341437	NA	7422	1
	GO:0048714	positive regulation of oligodendrocyte differentiation	2018-01-04	17/17381	0.00390692	0.0318535	0.00852739	3066	1			hsa04933	AGE-RAGE signaling pathway in diabetic complications	2018-01-01	99/7322	0.0135209	0.0341437	NA	7422	1
	GO:0032026	response to magnesium ion	2018-01-04	18/17381	0.00413638	0.0318535	0.00852739	4193	1			hsa04066	HIF-1 signaling pathway	2018-01-01	100/7322	0.0136575	0.0341437	NA	7422	1
	GO:1901652	response to peptide	2018-02-04	477/17381	0.00434708	0.0318535	0.00852739	4193/8503	2			hsa04926	Relaxin signaling pathway	2018-01-01	130/7322	0.0177547	0.0379678	NA	7422	1
	GO:0055093	response to hyperoxia	2018-01-04	19/17381	0.0043658	0.0318535	0.00852739	3066	1			hsa05418	Fluid shear stress and atherosclerosis	2018-01-01	139/7322	0.0189839	0.0379678	NA	7422	1
	GO:0003283	atrial septum development	2018-01-04	20/17381	0.00459518	0.0318535	0.00852739	4193	1			hsa05167	Kaposi's sarcoma-associated herpesvirus infection	2018-01-01	186/7322	0.0254029	0.0409724	NA	7422	1
	GO:0010869	regulation of receptor biosynthetic process	2018-01-04	20/17381	0.00459518	0.0318535	0.00852739	3066	1			hsa04510	Focal adhesion	2018-01-01	199/7322	0.0271784	0.0409724	NA	7422	1
	GO:0046827	positive regulation of protein export from nucleus	2018-01-04	20/17381	0.00459518	0.0318535	0.00852739	4193	1			hsa05205	Proteoglycans in cancer	2018-01-01	203/7322	0.0277247	0.0409724	NA	7422	1
	GO:1902254	negative regulation of intrinsic apoptotic signaling pathway by p53 class mediator	2018-01-04	20/17381	0.00459518	0.0318535	0.00852739	4193	1			hsa04015	Rap1 signaling pathway	2018-01-01	210/7322	0.0286807	0.0409724	NA	7422	1
	GO:2000757	negative regulation of peptidyl-lysine acetylation	2018-01-04	20/17381	0.00459518	0.0318535	0.00852739	3066	1			hsa04014	Ras signaling pathway	2018-01-01	236/7322	0.0322316	0.0429755	NA	7422	1
	GO:2001273	regulation of glucose import in response to insulin stimulus	2018-01-04	20/17381	0.00459518	0.0318535	0.00852739	8503	1			hsa04060	Cytokine-cytokine receptor interaction	2018-01-01	270/7322	0.0368752	0.0453732	NA	7422	1
	GO:0003181	atrioventricular valve morphogenesis	2018-01-04	21/17381	0.00482453	0.0318535	0.00852739	4193	1			hsa04010	MAPK signaling pathway	2018-01-01	294/7322	0.040153	0.0453732	NA	7422	1
	GO:0043586	tongue development	2018-01-04	21/17381	0.00482453	0.0318535	0.00852739	3066	1			hsa05206	MicroRNAs in cancer	2018-01-01	299/7322	0.0408358	0.0453732	NA	7422	1
	GO:0070932	histone H3 deacetylation	2018-01-04	21/17381	0.00482453	0.0318535	0.00852739	3066	1			hsa05165	Human papillomavirus infection	2018-01-01	319/7322	0.0435673	0.0458603	NA	7422	1
	GO:0044381	glucose import in response to insulin stimulus	2018-01-04	22/17381	0.00505383	0.0318535	0.00852739	8503	1			hsa04151	PI3K-Akt signaling pathway	2018-01-01	351/7322	0.0479377	0.0479377	NA	7422	1
	GO:0071157	negative regulation of cell cycle arrest	2018-01-04	23/17381	0.00528309	0.0318535	0.00852739	4193	1		Module 21	hsa05219	Bladder cancer	2018-01-01	41/7322	0.00559956	0.0294132	NA	1019	1
	GO:1901984	negative regulation of protein acetylation	2018-01-04	23/17381	0.00528309	0.0318535	0.00852739	3066	1			hsa05223	Non-small cell lung cancer	2018-01-01	66/7322	0.00901393	0.0294132	NA	1019	1
	GO:1904707	positive regulation of vascular smooth muscle cell proliferation	2018-01-04	23/17381	0.00528309	0.0318535	0.00852739	4193	1			hsa04115	p53 signaling pathway	2018-01-01	68/7322	0.00928708	0.0294132	NA	1019	1
	GO:0003171	atrioventricular valve development	2018-01-04	24/17381	0.00551232	0.0318535	0.00852739	4193	1			hsa05214	Glioma	2018-01-01	71/7322	0.0096968	0.0294132	NA	1019	1
	GO:0032800	receptor biosynthetic process	2018-01-04	24/17381	0.00551232	0.0318535	0.00852739	3066	1			hsa05212	Pancreatic cancer	2018-01-01	75/7322	0.0102431	0.0294132	NA	1019	1
	GO:0032967	positive regulation of collagen biosynthetic process	2018-01-04	24/17381	0.00551232	0.0318535	0.00852739	3066	1			hsa05218	Melanoma	2018-01-01	76/7322	0.0103797	0.0294132	NA	1019	1
	GO:0001975	response to amphetamine	2018-01-04	25/17381	0.0057415	0.0318535	0.00852739	3066	1			hsa05220	Chronic myeloid leukemia	2018-01-01	78/7322	0.0106528	0.0294132	NA	1019	1
	GO:0010714	positive regulation of collagen metabolic process	2018-01-04	25/17381	0.0057415	0.0318535	0.00852739	3066	1			hsa05222	Small cell lung cancer	2018-01-01	93/7322	0.0127014	0.0294132	NA	1019	1
	GO:0035902	response to immobilization stress	2018-01-04	25/17381	0.0057415	0.0318535	0.00852739	4193	1			hsa01522	Endocrine resistance	2018-01-01	96/7322	0.0131112	0.0294132	NA	1019	1
	GO:0044253	positive regulation of multicellular organismal metabolic process	2018-01-04	25/17381	0.0057415	0.0318535	0.00852739	3066	1			hsa04933	AGE-RAGE signaling pathway in diabetic complications	2018-01-01	99/7322	0.0135209	0.0294132	NA	1019	1
	GO:1904738	vascular associated smooth muscle cell migration	2018-01-04	25/17381	0.0057415	0.0318535	0.00852739	4193	1			hsa04660	T cell receptor signaling pathway	2018-01-01	103/7322	0.0140672	0.0294132	NA	1019	1
	GO:1904752	regulation of vascular associated smooth muscle cell migration	2018-01-04	25/17381	0.0057415	0.0318535	0.00852739	4193	1			hsa04110	Cell cycle	2018-01-01	124/7322	0.0169353	0.0296671	NA	1019	1
	GO:0036296	response to increased oxygen levels	2018-01-04	26/17381	0.00597065	0.0326091	0.00872966	3066	1			hsa05162	Measles	2018-01-01	134/7322	0.018301	0.0296671	NA	1019	1
	GO:0071480	cellular response to gamma radiation	2018-01-04	27/17381	0.00619975	0.0326091	0.00872966	4193	1			hsa05161	Hepatitis B	2018-01-01	144/7322	0.0196668	0.0296671	NA	1019	1
	GO:1900078	positive regulation of cellular response to insulin stimulus	2018-01-04	27/17381	0.00619975	0.0326091	0.00872966	8503	1			hsa05224	Breast cancer	2018-01-01	151/7322	0.0206228	0.0296671	NA	1019	1
	GO:1902253	regulation of intrinsic apoptotic signaling pathway by p53 class mediator	2018-01-04	27/17381	0.00619975	0.0326091	0.00872966	4193	1			hsa04218	Cellular senescence	2018-01-01	160/7322	0.021852	0.0296671	NA	1019	1
	GO:0003203	endocardial cushion morphogenesis	2018-01-04	29/17381	0.00665784	0.0328832	0.00880305	4193	1			hsa05225	Hepatocellular carcinoma	2018-01-01	168/7322	0.0229446	0.0296671	NA	1019	1
	GO:0071295	cellular response to vitamin	2018-01-04	29/17381	0.00665784	0.0328832	0.00880305	4193	1			hsa04530	Tight junction	2018-01-01	170/7322	0.0232177	0.0296671	NA	1019	1
	GO:1901797	negative regulation of signal transduction by p53 class mediator	2018-01-04	29/17381	0.00665784	0.0328832	0.00880305	4193	1			hsa05167	Kaposi's sarcoma-associated herpesvirus infection	2018-01-01	186/7322	0.0254029	0.0307509	NA	1019	1
	GO:1902893	regulation of pri-miRNA transcription from RNA polymerase II promoter	2018-01-04	29/17381	0.00665784	0.0328832	0.00880305	4775	1			hsa05203	Viral carcinogenesis	2018-01-01	201/7322	0.0274515	0.0315692	NA	1019	1
	GO:2000171	negative regulation of dendrite development	2018-01-04	29/17381	0.00665784	0.0328832	0.00880305	3066	1			hsa05166	HTLV-I infection	2018-01-01	255/7322	0.0348266	0.0381434	NA	1019	1
	GO:0043516	regulation of DNA damage response, signal transduction by p53 class mediator	2018-01-04	30/17381	0.00688683	0.0336044	0.00899611	4193	1			hsa05165	Human papillomavirus infection	2018-01-01	319/7322	0.0435673	0.0455477	NA	1019	1
	GO:0048713	regulation of oligodendrocyte differentiation	2018-01-04	31/17381	0.00711578	0.0343082	0.00918452	3066	1			hsa04151	PI3K-Akt signaling pathway	2018-01-01	351/7322	0.0479377	0.0479377	NA	1019	1
	GO:0014072	response to isoquinoline alkaloid	2018-01-04	32/17381	0.00734468	0.0345883	0.00925951	4193	1		Module 25	hsa05323	Rheumatoid arthritis	2018-01-01	90/7322	0.0122917	0.0264955	NA	3589	1
	GO:0043278	response to morphine	2018-01-04	32/17381	0.00734468	0.0345883	0.00925951	4193	1			hsa04640	Hematopoietic cell lineage	2018-01-01	97/7322	0.0132477	0.0264955	NA	3589	1
	GO:0061614	pri-miRNA transcription from RNA polymerase II promoter	2018-01-04	33/17381	0.00757355	0.0347249	0.00929607	4775	1			hsa04630	Jak-STAT signaling pathway	2018-01-01	162/7322	0.0221251	0.0295001	NA	3589	1
	GO:0071312	cellular response to alkaloid	2018-01-04	33/17381	0.00757355	0.0347249	0.00929607	4193	1			hsa04060	Cytokine-cytokine receptor interaction	2018-01-01	270/7322	0.0368752	0.0368752	NA	3589	1
	GO:0010039	response to iron ion	2018-01-04	34/17381	0.00780238	0.0347249	0.00929607	4193	1		Module 26	hsa04650	Natural killer cell mediated cytotoxicity	2018-02-02	133/7322	0.000327511	0.0125207	0.00222755	8795/4893	2
	GO:0071868	cellular response to monoamine stimulus	2018-01-04	34/17381	0.00780238	0.0347249	0.00929607	3066	1			hsa04210	Apoptosis	2018-02-02	138/7322	0.000352695	0.0125207	0.00222755	8795/4893	2
	GO:0071870	cellular response to catecholamine stimulus	2018-01-04	34/17381	0.00780238	0.0347249	0.00929607	3066	1		Module 27	hsa05206	MicroRNAs in cancer	2018-02-02	299/7322	0.00166222	0.0299199	0.0069988	6659/1021	2
	GO:0003230	cardiac atrium development	2018-01-04	35/17381	0.00803117	0.0347262	0.00929642	4193	1		Moduel 28	hsa04060	Cytokine-cytokine receptor interaction	2018-02-02	270/7322	0.00135493	0.0305329	0.00507472	7042/3815	2
	GO:0045687	positive regulation of glial cell differentiation	2018-01-04	35/17381	0.00803117	0.0347262	0.00929642	3066	1			hsa04010	MAPK signaling pathway	2018-02-02	294/7322	0.001607	0.0305329	0.00507472	7042/3815	2
	GO:0003179	heart valve morphogenesis	2018-01-04	36/17381	0.00825992	0.0347262	0.00929642	4193	1		Module 29	hsa05222	Small cell lung cancer	2018-02-02	93/7322	0.000159614	0.00734224	0.00100809	836/5925	2
	GO:0014911	positive regulation of smooth muscle cell migration	2018-01-04	36/17381	0.00825992	0.0347262	0.00929642	4193	1			hsa05161	Hepatitis B	2018-02-02	144/7322	0.000384148	0.0086243	0.00118411	836/5925	2
	GO:1900087	positive regulation of G1/S transition of mitotic cell cycle	2018-01-04	36/17381	0.00825992	0.0347262	0.00929642	4193	1			hsa05167	Kaposi's sarcoma-associated herpesvirus infection	2018-02-02	186/7322	0.000641925	0.0086243	0.00118411	836/5925	2
	GO:0014075	response to amine	2018-01-04	37/17381	0.00848862	0.0347262	0.00929642	3066	1			hsa05203	Viral carcinogenesis	2018-02-02	201/7322	0.000749939	0.0086243	0.00118411	836/5925	2
	GO:0071867	response to monoamine	2018-01-04	37/17381	0.00848862	0.0347262	0.00929642	3066	1			hsa05165	Human papillomavirus infection	2018-02-02	319/7322	0.00189242	0.0174103	0.00239043	836/5925	2
	GO:0071869	response to catecholamine	2018-01-04	37/17381	0.00848862	0.0347262	0.00929642	3066	1			hsa04215	Apoptosis - multiple species	2018-01-02	33/7322	0.00899423	0.0487453	0.00669272	836	1
	GO:0003197	endocardial cushion development	2018-01-04	39/17381	0.00894592	0.0350536	0.00938406	4193	1			hsa05219	Bladder cancer	2018-01-02	41/7322	0.0111685	0.0487453	0.00669272	5925	1
	GO:0032965	regulation of collagen biosynthetic process	2018-01-04	39/17381	0.00894592	0.0350536	0.00938406	3066	1			hsa05014	Amyotrophic lateral sclerosis (ALS)	2018-01-02	51/7322	0.013883	0.0487453	0.00669272	836	1
	GO:1904705	regulation of vascular smooth muscle cell proliferation	2018-01-04	39/17381	0.00894592	0.0350536	0.00938406	4193	1			hsa05134	Legionellosis	2018-01-02	55/7322	0.0149678	0.0487453	0.00669272	836	1
	GO:1990874	vascular smooth muscle cell proliferation	2018-01-04	39/17381	0.00894592	0.0350536	0.00938406	4193	1			hsa05416	Viral myocarditis	2018-01-02	59/7322	0.016052	0.0487453	0.00669272	836	1
	GO:0003170	heart valve development	2018-01-04	40/17381	0.00917451	0.0350536	0.00938406	4193	1			hsa05223	Non-small cell lung cancer	2018-01-02	66/7322	0.0179478	0.0487453	0.00669272	5925	1
	GO:0031670	cellular response to nutrient	2018-01-04	40/17381	0.00917451	0.0350536	0.00938406	4193	1			hsa04115	p53 signaling pathway	2018-01-02	68/7322	0.0184892	0.0487453	0.00669272	836	1
	GO:0046825	regulation of protein export from nucleus	2018-01-04	40/17381	0.00917451	0.0350536	0.00938406	4193	1			hsa05120	Epithelial cell signaling in Helicobacter pylori infection	2018-01-02	68/7322	0.0184892	0.0487453	0.00669272	836	1
	GO:0010955	negative regulation of protein processing	2018-01-04	41/17381	0.00940307	0.0352615	0.00943972	4193	1			hsa05214	Glioma	2018-01-02	71/7322	0.0193009	0.0487453	0.00669272	5925	1
	GO:1903318	negative regulation of protein maturation	2018-01-04	41/17381	0.00940307	0.0352615	0.00943972	4193	1			hsa05210	Colorectal cancer	2018-01-02	72/7322	0.0195714	0.0487453	0.00669272	836	1
	GO:0031648	protein destabilization	2018-01-04	42/17381	0.00963158	0.0354617	0.00949332	4193	1			hsa01524	Platinum drug resistance	2018-01-02	73/7322	0.0198419	0.0487453	0.00669272	836	1
	GO:0043551	regulation of phosphatidylinositol 3-kinase activity	2018-01-04	42/17381	0.00963158	0.0354617	0.00949332	8503	1			hsa05212	Pancreatic cancer	2018-01-02	75/7322	0.0203827	0.0487453	0.00669272	5925	1
	GO:0032732	positive regulation of interleukin-1 production	2018-01-04	43/17381	0.00986005	0.0356546	0.00954497	3066	1			hsa05133	Pertussis	2018-01-02	76/7322	0.020653	0.0487453	0.00669272	836	1
	GO:0046326	positive regulation of glucose import	2018-01-04	43/17381	0.00986005	0.0356546	0.00954497	8503	1			hsa05218	Melanoma	2018-01-02	76/7322	0.020653	0.0487453	0.00669272	5925	1
	GO:0010712	regulation of collagen metabolic process	2018-01-04	44/17381	0.0100885	0.0360602	0.00965354	3066	1			hsa05220	Chronic myeloid leukemia	2018-01-02	78/7322	0.0211936	0.0487453	0.00669272	5925	1
	GO:0044246	regulation of multicellular organismal metabolic process	2018-01-04	45/17381	0.0103169	0.0360602	0.00965354	3066	1			hsa04657	IL-17 signaling pathway	2018-01-02	93/7322	0.0252433	0.0494239	0.00678589	836	1
	GO:1902808	positive regulation of cell cycle G1/S phase transition	2018-01-04	45/17381	0.0103169	0.0360602	0.00965354	4193	1			hsa01522	Endocrine resistance	2018-01-02	96/7322	0.0260522	0.0494239	0.00678589	5925	1
	GO:0001974	blood vessel remodeling	2018-01-04	46/17381	0.0105452	0.0360602	0.00965354	4193	1			hsa05146	Amoebiasis	2018-01-02	96/7322	0.0260522	0.0494239	0.00678589	836	1
	GO:0072132	mesenchyme morphogenesis	2018-01-04	46/17381	0.0105452	0.0360602	0.00965354	4193	1			hsa05215	Prostate cancer	2018-01-02	97/7322	0.0263218	0.0494239	0.00678589	5925	1
	GO:0010718	positive regulation of epithelial to mesenchymal transition	2018-01-04	47/17381	0.0107735	0.0360602	0.00965354	3066	1			hsa04933	AGE-RAGE signaling pathway in diabetic complications	2018-01-02	99/7322	0.0268608	0.0494239	0.00678589	836	1
	GO:0010828	positive regulation of glucose transport	2018-01-04	47/17381	0.0107735	0.0360602	0.00965354	8503	1
	GO:0032964	collagen biosynthetic process	2018-01-04	47/17381	0.0107735	0.0360602	0.00965354	3066	1
	GO:0035094	response to nicotine	2018-01-04	47/17381	0.0107735	0.0360602	0.00965354	3066	1
	GO:0046677	response to antibiotic	2018-01-04	48/17381	0.0110018	0.0365224	0.00977728	4193	1
	GO:0036092	phosphatidylinositol-3-phosphate biosynthetic process	2018-01-04	50/17381	0.0114582	0.0374241	0.0100187	8503	1
	GO:0043392	negative regulation of DNA binding	2018-01-04	50/17381	0.0114582	0.0374241	0.0100187	3066	1
	GO:0043550	regulation of lipid kinase activity	2018-01-04	51/17381	0.0116864	0.0378639	0.0101364	8503	1
	GO:0014015	positive regulation of gliogenesis	2018-01-04	54/17381	0.0123706	0.0397627	0.0106447	3066	1
	GO:0010332	response to gamma radiation	2018-01-04	55/17381	0.0125986	0.0398628	0.0106715	4193	1
	GO:0032922	circadian regulation of gene expression	2018-01-04	55/17381	0.0125986	0.0398628	0.0106715	3066	1
	GO:2000756	regulation of peptidyl-lysine acetylation	2018-01-04	57/17381	0.0130545	0.0403199	0.0107939	3066	1
	GO:0051865	protein autoubiquitination	2018-01-04	58/17381	0.0132824	0.0403199	0.0107939	4193	1
	GO:0071242	cellular response to ammonium ion	2018-01-04	60/17381	0.013738	0.0403199	0.0107939	3066	1
	GO:0045685	regulation of glial cell differentiation	2018-01-04	61/17381	0.0139658	0.0403199	0.0107939	3066	1
	GO:0006977	DNA damage response, signal transduction by p53 class mediator resulting in cell cycle arrest	2018-01-04	62/17381	0.0141935	0.0403199	0.0107939	4193	1
	GO:0042733	embryonic digit morphogenesis	2018-01-04	63/17381	0.0144212	0.0403199	0.0107939	3066	1
	GO:0072431	signal transduction involved in mitotic G1 DNA damage checkpoint	2018-01-04	63/17381	0.0144212	0.0403199	0.0107939	4193	1
	GO:1902400	intracellular signal transduction involved in G1 DNA damage checkpoint	2018-01-04	63/17381	0.0144212	0.0403199	0.0107939	4193	1
	GO:0042531	positive regulation of tyrosine phosphorylation of STAT protein	2018-01-04	64/17381	0.0146488	0.0403199	0.0107939	3066	1
	GO:1901983	regulation of protein acetylation	2018-01-04	64/17381	0.0146488	0.0403199	0.0107939	3066	1
	GO:2001021	negative regulation of response to DNA damage stimulus	2018-01-04	64/17381	0.0146488	0.0403199	0.0107939	4193	1
	GO:0003281	ventricular septum development	2018-01-04	65/17381	0.0148764	0.0403199	0.0107939	4193	1
	GO:0032760	positive regulation of tumor necrosis factor production	2018-01-04	65/17381	0.0148764	0.0403199	0.0107939	3066	1
	GO:0046324	regulation of glucose import	2018-01-04	65/17381	0.0148764	0.0403199	0.0107939	8503	1
	GO:0072413	signal transduction involved in mitotic cell cycle checkpoint	2018-01-04	65/17381	0.0148764	0.0403199	0.0107939	4193	1
	GO:1902402	signal transduction involved in mitotic DNA damage checkpoint	2018-01-04	65/17381	0.0148764	0.0403199	0.0107939	4193	1
	GO:1902403	signal transduction involved in mitotic DNA integrity checkpoint	2018-01-04	65/17381	0.0148764	0.0403199	0.0107939	4193	1
	GO:0071479	cellular response to ionizing radiation	2018-01-04	66/17381	0.015104	0.0403199	0.0107939	4193	1
	GO:1903725	regulation of phospholipid metabolic process	2018-01-04	66/17381	0.015104	0.0403199	0.0107939	8503	1
	GO:0014910	regulation of smooth muscle cell migration	2018-01-04	67/17381	0.0153315	0.0403199	0.0107939	4193	1
	GO:0060411	cardiac septum morphogenesis	2018-01-04	67/17381	0.0153315	0.0403199	0.0107939	4193	1
	GO:0060998	regulation of dendritic spine development	2018-01-04	67/17381	0.0153315	0.0403199	0.0107939	3066	1
	GO:0072401	signal transduction involved in DNA integrity checkpoint	2018-01-04	67/17381	0.0153315	0.0403199	0.0107939	4193	1
	GO:0072422	signal transduction involved in DNA damage checkpoint	2018-01-04	67/17381	0.0153315	0.0403199	0.0107939	4193	1
	GO:1900076	regulation of cellular response to insulin stimulus	2018-01-04	67/17381	0.0153315	0.0403199	0.0107939	8503	1
	GO:1903557	positive regulation of tumor necrosis factor superfamily cytokine production	2018-01-04	67/17381	0.0153315	0.0403199	0.0107939	3066	1
	GO:0071300	cellular response to retinoic acid	2018-01-04	68/17381	0.015559	0.0403936	0.0108136	3066	1
	GO:0072395	signal transduction involved in cell cycle checkpoint	2018-01-04	68/17381	0.015559	0.0403936	0.0108136	4193	1
	GO:1901992	positive regulation of mitotic cell cycle phase transition	2018-01-04	70/17381	0.0160139	0.0413096	0.0110589	4193	1
	GO:0031571	mitotic G1 DNA damage checkpoint	2018-01-04	71/17381	0.0162412	0.0413692	0.0110748	4193	1
	GO:0044819	mitotic G1/S transition checkpoint	2018-01-04	71/17381	0.0162412	0.0413692	0.0110748	4193	1
	GO:0044783	G1 DNA damage checkpoint	2018-01-04	72/17381	0.0164686	0.041686	0.0111596	4193	1
	GO:0032652	regulation of interleukin-1 production	2018-01-04	73/17381	0.0166958	0.0417918	0.0111879	3066	1
	GO:0034644	cellular response to UV	2018-01-04	74/17381	0.0169231	0.0417918	0.0111879	4193	1
	GO:0042509	regulation of tyrosine phosphorylation of STAT protein	2018-01-04	74/17381	0.0169231	0.0417918	0.0111879	3066	1
	GO:0043627	response to estrogen	2018-01-04	74/17381	0.0169231	0.0417918	0.0111879	4193	1
	GO:0010827	regulation of glucose transport	2018-01-04	75/17381	0.0171503	0.0420962	0.0112694	8503	1
	GO:0014909	smooth muscle cell migration	2018-01-04	76/17381	0.0173775	0.0423968	0.0113499	4193	1
	GO:0007260	tyrosine phosphorylation of STAT protein	2018-01-04	77/17381	0.0176046	0.0424814	0.0113725	3066	1
	GO:0043044	ATP-dependent chromatin remodeling	2018-01-04	78/17381	0.0178317	0.0424814	0.0113725	3066	1
	GO:0046323	glucose import	2018-01-04	78/17381	0.0178317	0.0424814	0.0113725	8503	1
	GO:0048661	positive regulation of smooth muscle cell proliferation	2018-01-04	78/17381	0.0178317	0.0424814	0.0113725	4193	1
	GO:0046427	positive regulation of JAK-STAT cascade	2018-01-04	79/17381	0.0180587	0.042522	0.0113834	3066	1
	GO:1904894	positive regulation of STAT cascade	2018-01-04	79/17381	0.0180587	0.042522	0.0113834	3066	1
	GO:0032436	positive regulation of proteasomal ubiquitin-dependent protein catabolic process	2018-01-04	80/17381	0.0182858	0.0428077	0.0114599	4193	1
	GO:0032612	interleukin-1 production	2018-01-04	83/17381	0.0189666	0.043894	0.0117507	3066	1
	GO:0072332	intrinsic apoptotic signaling pathway by p53 class mediator	2018-01-04	83/17381	0.0189666	0.043894	0.0117507	4193	1
	GO:0042475	odontogenesis of dentin-containing tooth	2018-01-04	84/17381	0.0191934	0.0439171	0.0117569	3066	1
	GO:1901989	positive regulation of cell cycle phase transition	2018-01-04	84/17381	0.0191934	0.0439171	0.0117569	4193	1
	GO:0010717	regulation of epithelial to mesenchymal transition	2018-01-04	85/17381	0.0194202	0.0439396	0.0117629	3066	1
	GO:0048709	oligodendrocyte differentiation	2018-01-04	85/17381	0.0194202	0.0439396	0.0117629	3066	1
	GO:0016575	histone deacetylation	2018-01-04	86/17381	0.019647	0.0440239	0.0117855	3066	1
	GO:0001942	hair follicle development	2018-01-04	87/17381	0.0198737	0.0440239	0.0117855	3066	1
	GO:0014812	muscle cell migration	2018-01-04	87/17381	0.0198737	0.0440239	0.0117855	4193	1
	GO:0071158	positive regulation of cell cycle arrest	2018-01-04	88/17381	0.0201004	0.0440239	0.0117855	4193	1
	GO:0022404	molting cycle process	2018-01-04	89/17381	0.0203271	0.0440239	0.0117855	3066	1
	GO:0022405	hair cycle process	2018-01-04	89/17381	0.0203271	0.0440239	0.0117855	3066	1
	GO:0060996	dendritic spine development	2018-01-04	89/17381	0.0203271	0.0440239	0.0117855	3066	1
	GO:0098773	skin epidermis development	2018-01-04	89/17381	0.0203271	0.0440239	0.0117855	3066	1
	GO:0033273	response to vitamin	2018-01-04	91/17381	0.0207803	0.0445292	0.0119207	4193	1
	GO:0043154	negative regulation of cysteine-type endopeptidase activity involved in apoptotic process	2018-01-04	91/17381	0.0207803	0.0445292	0.0119207	4193	1
	GO:0016925	protein sumoylation	2018-01-04	94/17381	0.0214598	0.0457432	0.0122458	4193	1
	GO:0003300	cardiac muscle hypertrophy	2018-01-04	95/17381	0.0216862	0.0457444	0.0122461	3066	1
	GO:2001243	negative regulation of intrinsic apoptotic signaling pathway	2018-01-04	95/17381	0.0216862	0.0457444	0.0122461	4193	1
	GO:0002027	regulation of heart rate	2018-01-04	97/17381	0.0221389	0.0462179	0.0123728	4193	1
	GO:0014897	striated muscle hypertrophy	2018-01-04	97/17381	0.0221389	0.0462179	0.0123728	3066	1
	GO:0003279	cardiac septum development	2018-01-04	98/17381	0.0223652	0.0464445	0.0124335	4193	1
	GO:0006476	protein deacetylation	2018-01-04	99/17381	0.0225915	0.0464445	0.0124335	3066	1
	GO:0014896	muscle hypertrophy	2018-01-04	99/17381	0.0225915	0.0464445	0.0124335	3066	1
	GO:0044773	mitotic DNA damage checkpoint	2018-01-04	102/17381	0.0232701	0.047343	0.012674	4193	1
	GO:1901800	positive regulation of proteasomal protein catabolic process	2018-01-04	102/17381	0.0232701	0.047343	0.012674	4193	1
	GO:0014013	regulation of gliogenesis	2018-01-04	103/17381	0.0234962	0.047343	0.012674	3066	1
	GO:0032526	response to retinoic acid	2018-01-04	103/17381	0.0234962	0.047343	0.012674	3066	1
	GO:0030330	DNA damage response, signal transduction by p53 class mediator	2018-01-04	109/17381	0.024852	0.0487708	0.0130562	4193	1
	GO:0035601	protein deacylation	2018-01-04	109/17381	0.024852	0.0487708	0.0130562	3066	1
	GO:0044774	mitotic DNA integrity checkpoint	2018-01-04	109/17381	0.024852	0.0487708	0.0130562	4193	1
	GO:0071482	cellular response to light stimulus	2018-01-04	109/17381	0.024852	0.0487708	0.0130562	4193	1
	GO:0098732	macromolecule deacylation	2018-01-04	110/17381	0.0250778	0.0487708	0.0130562	3066	1
	GO:2000134	negative regulation of G1/S transition of mitotic cell cycle	2018-01-04	110/17381	0.0250778	0.0487708	0.0130562	4193	1
	GO:0042303	molting cycle	2018-01-04	111/17381	0.0253036	0.0487708	0.0130562	3066	1
	GO:0042633	hair cycle	2018-01-04	111/17381	0.0253036	0.0487708	0.0130562	3066	1
	GO:2000117	negative regulation of cysteine-type endopeptidase activity	2018-01-04	111/17381	0.0253036	0.0487708	0.0130562	4193	1
	GO:0032680	regulation of tumor necrosis factor production	2018-01-04	112/17381	0.0255294	0.0487708	0.0130562	3066	1
	GO:0051101	regulation of DNA binding	2018-01-04	112/17381	0.0255294	0.0487708	0.0130562	3066	1
	GO:0071156	regulation of cell cycle arrest	2018-01-04	113/17381	0.0257551	0.0489106	0.0130937	4193	1
	GO:0032640	tumor necrosis factor production	2018-01-04	114/17381	0.0259808	0.0489106	0.0130937	3066	1
	GO:0032434	regulation of proteasomal ubiquitin-dependent protein catabolic process	2018-01-04	115/17381	0.0262064	0.0489106	0.0130937	4193	1
	GO:0034605	cellular response to heat	2018-01-04	115/17381	0.0262064	0.0489106	0.0130937	3066	1
	GO:1903555	regulation of tumor necrosis factor superfamily cytokine production	2018-01-04	115/17381	0.0262064	0.0489106	0.0130937	3066	1
	GO:1902807	negative regulation of cell cycle G1/S phase transition	2018-01-04	117/17381	0.0266576	0.0492331	0.01318	4193	1
	GO:0006342	chromatin silencing	2018-01-04	118/17381	0.0268831	0.0492331	0.01318	3066	1
	GO:0015758	glucose transport	2018-01-04	118/17381	0.0268831	0.0492331	0.01318	8503	1
	GO:0003231	cardiac ventricle development	2018-01-04	119/17381	0.0271086	0.0492331	0.01318	4193	1
	GO:0046824	positive regulation of nucleocytoplasmic transport	2018-01-04	119/17381	0.0271086	0.0492331	0.01318	4193	1
	GO:0071706	tumor necrosis factor superfamily cytokine production	2018-01-04	119/17381	0.0271086	0.0492331	0.01318	3066	1
	GO:0042476	odontogenesis	2018-01-04	120/17381	0.027334	0.0494209	0.0132303	3066	1
	GO:0008286	insulin receptor signaling pathway	2018-01-04	121/17381	0.0275594	0.0496069	0.0132801	8503	1
	GO:0003206	cardiac chamber morphogenesis	2018-01-04	122/17381	0.0277848	0.0497913	0.0133294	4193	1
	GO:0042770	signal transduction in response to DNA damage	2018-01-04	123/17381	0.0280101	0.049974	0.0133783	4193	1
Module 6	GO:0051385	response to mineralocorticoid	2018-02-07	28/17381	5.22938e-05	0.0200753	0.0110668	1490/1026	2
	GO:0006352	DNA-templated transcription, initiation	2018-03-07	243/17381	9.06333e-05	0.0200753	0.0110668	1490/8467/1026	3
	GO:0007568	aging	2018-03-07	294/17381	0.000159437	0.020959	0.011554	1490/7076/1026	3
	GO:0030198	extracellular matrix organization	2018-03-07	335/17381	0.000234487	0.020959	0.011554	1490/7076/2200	3
	GO:0043062	extracellular structure organization	2018-03-07	336/17381	0.000236558	0.020959	0.011554	1490/7076/2200	3
	GO:0043434	response to peptide hormone	2018-03-07	410/17381	0.000424966	0.0313767	0.0172969	1490/7076/2200	3
	GO:0022617	extracellular matrix disassembly	2018-02-07	92/17381	0.000572032	0.0319161	0.0175942	7076/2200	2
	GO:0007229	integrin-mediated signaling pathway	2018-02-07	96/17381	0.000622661	0.0319161	0.0175942	1490/7076	2
	GO:1901652	response to peptide	2018-03-07	477/17381	0.000662072	0.0319161	0.0175942	1490/7076/2200	3
	GO:0001501	skeletal system development	2018-03-07	491/17381	0.000720453	0.0319161	0.0175942	1490/7076/2200	3
Module 7	GO:0071260	cellular response to mechanical stimulus	2018-02-04	78/17381	0.000118598	0.0142707	0.00541226	9994/4214	2
	GO:0007098	centrosome cycle	2018-02-04	118/17381	0.000271783	0.0142707	0.00541226	1017/117178	2
	GO:0031023	microtubule organizing center organization	2018-02-04	127/17381	0.000314795	0.0142707	0.00541226	1017/117178	2
	GO:0009612	response to mechanical stimulus	2018-02-04	210/17381	0.000857901	0.0291686	0.0110624	9994/4214	2
	GO:0071496	cellular response to external stimulus	2018-02-04	288/17381	0.00160593	0.032941	0.0124931	9994/4214	2
	GO:0071214	cellular response to abiotic stimulus	2018-02-04	296/17381	0.00169549	0.032941	0.0124931	9994/4214	2
	GO:0104004	cellular response to environmental stimulus	2018-02-04	296/17381	0.00169549	0.032941	0.0124931	9994/4214	2
	GO:0007265	Ras protein signal transduction	2018-02-04	338/17381	0.00220452	0.0374769	0.0142134	1017/117178	2
	GO:0035020	regulation of Rac protein signal transduction	2018-01-04	14/17381	0.0032183	0.0424107	0.0160845	117178	1
	GO:2000105	positive regulation of DNA-dependent DNA replication	2018-01-04	14/17381	0.0032183	0.0424107	0.0160845	1017	1
	GO:0071732	cellular response to nitric oxide	2018-01-04	16/17381	0.00367742	0.0424107	0.0160845	1017	1
	GO:0000226	microtubule cytoskeleton organization	2018-02-04	472/17381	0.00425799	0.0424107	0.0160845	1017/117178	2
	GO:0071731	response to nitric oxide	2018-01-04	19/17381	0.0043658	0.0424107	0.0160845	1017	1
	GO:1902170	cellular response to reactive nitrogen species	2018-01-04	19/17381	0.0043658	0.0424107	0.0160845	1017	1
Module 8	GO:0016049	cell growth	2018-03-04	486/17381	8.51109e-05	0.0303619	0.00838397	367/351/10298	3
	GO:0008203	cholesterol metabolic process	2018-02-04	135/17381	0.000355651	0.0303619	0.00838397	351/949	2
	GO:0051092	positive regulation of NF-kappaB transcription factor activity	2018-02-04	140/17381	0.000382438	0.0303619	0.00838397	367/351	2
	GO:1902652	secondary alcohol metabolic process	2018-02-04	140/17381	0.000382438	0.0303619	0.00838397	351/949	2
	GO:0035264	multicellular organism growth	2018-02-04	146/17381	0.000415851	0.0303619	0.00838397	367/351	2
	GO:0016125	sterol metabolic process	2018-02-04	153/17381	0.000456581	0.0303619	0.00838397	351/949	2
	GO:0008037	cell recognition	2018-02-04	183/17381	0.000652379	0.0303619	0.00838397	351/949	2
	GO:0016358	dendrite development	2018-02-04	210/17381	0.000857901	0.0303619	0.00838397	351/10298	2
	GO:0051091	positive regulation of DNA binding transcription factor activity	2018-02-04	246/17381	0.0011748	0.0303619	0.00838397	367/351	2
	GO:0031098	stress-activated protein kinase signaling cascade	2018-02-04	289/17381	0.00161699	0.0303619	0.00838397	351/10298	2
	GO:0008202	steroid metabolic process	2018-02-04	309/17381	0.00184609	0.0303619	0.00838397	351/949	2
	GO:0048638	regulation of developmental growth	2018-02-04	310/17381	0.00185794	0.0303619	0.00838397	367/351	2
	GO:0006066	alcohol metabolic process	2018-02-04	320/17381	0.0019784	0.0303619	0.00838397	351/949	2
	GO:0033148	positive regulation of intracellular estrogen receptor signaling pathway	2018-01-04	10/17381	0.00229958	0.0303619	0.00838397	367	1
	GO:0035376	sterol import	2018-01-04	10/17381	0.00229958	0.0303619	0.00838397	949	1
	GO:0048143	astrocyte activation	2018-01-04	10/17381	0.00229958	0.0303619	0.00838397	351	1
	GO:0060513	prostatic bud formation	2018-01-04	10/17381	0.00229958	0.0303619	0.00838397	367	1
	GO:0060768	regulation of epithelial cell proliferation involved in prostate gland development	2018-01-04	10/17381	0.00229958	0.0303619	0.00838397	367	1
	GO:0070508	cholesterol import	2018-01-04	10/17381	0.00229958	0.0303619	0.00838397	949	1
	GO:1902004	positive regulation of amyloid-beta formation	2018-01-04	10/17381	0.00229958	0.0303619	0.00838397	351	1
	GO:1903729	regulation of plasma membrane organization	2018-01-04	10/17381	0.00229958	0.0303619	0.00838397	367	1
	GO:0050673	epithelial cell proliferation	2018-02-04	361/17381	0.00251074	0.0303619	0.00838397	367/949	2
	GO:0006702	androgen biosynthetic process	2018-01-04	11/17381	0.00252932	0.0303619	0.00838397	949	1
	GO:0006707	cholesterol catabolic process	2018-01-04	11/17381	0.00252932	0.0303619	0.00838397	949	1
	GO:0010867	positive regulation of triglyceride biosynthetic process	2018-01-04	11/17381	0.00252932	0.0303619	0.00838397	949	1
	GO:0016127	sterol catabolic process	2018-01-04	11/17381	0.00252932	0.0303619	0.00838397	949	1
	GO:0016322	neuron remodeling	2018-01-04	11/17381	0.00252932	0.0303619	0.00838397	351	1
	GO:0032490	detection of molecule of bacterial origin	2018-01-04	11/17381	0.00252932	0.0303619	0.00838397	949	1
	GO:0033327	Leydig cell differentiation	2018-01-04	11/17381	0.00252932	0.0303619	0.00838397	367	1
	GO:0035461	vitamin transmembrane transport	2018-01-04	11/17381	0.00252932	0.0303619	0.00838397	949	1
	GO:0045945	positive regulation of transcription from RNA polymerase III promoter	2018-01-04	11/17381	0.00252932	0.0303619	0.00838397	367	1
	GO:0060736	prostate gland growth	2018-01-04	11/17381	0.00252932	0.0303619	0.00838397	367	1
	GO:0060767	epithelial cell proliferation involved in prostate gland development	2018-01-04	11/17381	0.00252932	0.0303619	0.00838397	367	1
	GO:0072520	seminiferous tubule development	2018-01-04	11/17381	0.00252932	0.0303619	0.00838397	367	1
	GO:0034384	high-density lipoprotein particle clearance	2018-01-04	12/17381	0.00275902	0.0303619	0.00838397	949	1
	GO:0048711	positive regulation of astrocyte differentiation	2018-01-04	12/17381	0.00275902	0.0303619	0.00838397	351	1
	GO:0060742	epithelial cell differentiation involved in prostate gland development	2018-01-04	12/17381	0.00275902	0.0303619	0.00838397	367	1
	GO:1902993	positive regulation of amyloid precursor protein catabolic process	2018-01-04	12/17381	0.00275902	0.0303619	0.00838397	351	1
	GO:0051090	regulation of DNA binding transcription factor activity	2018-02-04	391/17381	0.00293915	0.0303619	0.00838397	367/351	2
	GO:0001967	suckling behavior	2018-01-04	13/17381	0.00298868	0.0303619	0.00838397	351	1
	GO:0006878	cellular copper ion homeostasis	2018-01-04	13/17381	0.00298868	0.0303619	0.00838397	351	1
	GO:0010885	regulation of cholesterol storage	2018-01-04	13/17381	0.00298868	0.0303619	0.00838397	949	1
	GO:0042659	regulation of cell fate specification	2018-01-04	13/17381	0.00298868	0.0303619	0.00838397	367	1
	GO:0043568	positive regulation of insulin-like growth factor receptor signaling pathway	2018-01-04	13/17381	0.00298868	0.0303619	0.00838397	367	1
	GO:0044406	adhesion of symbiont to host	2018-01-04	13/17381	0.00298868	0.0303619	0.00838397	949	1
	GO:0060601	lateral sprouting from an epithelium	2018-01-04	13/17381	0.00298868	0.0303619	0.00838397	367	1
	GO:0030238	male sex determination	2018-01-04	14/17381	0.0032183	0.0303619	0.00838397	367	1
	GO:0035112	genitalia morphogenesis	2018-01-04	14/17381	0.0032183	0.0303619	0.00838397	367	1
	GO:0010878	cholesterol storage	2018-01-04	15/17381	0.00344788	0.0303619	0.00838397	949	1
	GO:1990000	amyloid fibril formation	2018-01-04	15/17381	0.00344788	0.0303619	0.00838397	351	1
	GO:0055070	copper ion homeostasis	2018-01-04	16/17381	0.00367742	0.0303619	0.00838397	351	1
	GO:1900273	positive regulation of long-term synaptic potentiation	2018-01-04	16/17381	0.00367742	0.0303619	0.00838397	351	1
	GO:1902003	regulation of amyloid-beta formation	2018-01-04	16/17381	0.00367742	0.0303619	0.00838397	351	1
	GO:2000310	regulation of NMDA receptor activity	2018-01-04	16/17381	0.00367742	0.0303619	0.00838397	351	1
	GO:0030335	positive regulation of cell migration	2018-02-04	442/17381	0.00374212	0.0303619	0.00838397	351/949	2
	GO:0033145	positive regulation of intracellular steroid hormone receptor signaling pathway	2018-01-04	17/17381	0.00390692	0.0303619	0.00838397	367	1
	GO:0034375	high-density lipoprotein particle remodeling	2018-01-04	17/17381	0.00390692	0.0303619	0.00838397	949	1
	GO:0060572	morphogenesis of an epithelial bud	2018-01-04	17/17381	0.00390692	0.0303619	0.00838397	367	1
	GO:2000147	positive regulation of cell motility	2018-02-04	460/17381	0.00404779	0.0303619	0.00838397	351/949	2
	GO:0010866	regulation of triglyceride biosynthetic process	2018-01-04	18/17381	0.00413638	0.0303619	0.00838397	949	1
	GO:0051000	positive regulation of nitric-oxide synthase activity	2018-01-04	18/17381	0.00413638	0.0303619	0.00838397	949	1
	GO:0060749	mammary gland alveolus development	2018-01-04	18/17381	0.00413638	0.0303619	0.00838397	367	1
	GO:0061377	mammary gland lobule development	2018-01-04	18/17381	0.00413638	0.0303619	0.00838397	367	1
	GO:0098581	detection of external biotic stimulus	2018-01-04	18/17381	0.00413638	0.0303619	0.00838397	949	1
	GO:0051272	positive regulation of cellular component movement	2018-02-04	473/17381	0.00427574	0.0303619	0.00838397	351/949	2
	GO:0001759	organ induction	2018-01-04	19/17381	0.0043658	0.0303619	0.00838397	367	1
	GO:0010288	response to lead ion	2018-01-04	19/17381	0.0043658	0.0303619	0.00838397	351	1
	GO:0043691	reverse cholesterol transport	2018-01-04	19/17381	0.0043658	0.0303619	0.00838397	949	1
	GO:0046475	glycerophospholipid catabolic process	2018-01-04	19/17381	0.0043658	0.0303619	0.00838397	949	1
	GO:0090208	positive regulation of triglyceride metabolic process	2018-01-04	19/17381	0.0043658	0.0303619	0.00838397	949	1
	GO:0040017	positive regulation of locomotion	2018-02-04	490/17381	0.00458286	0.0303619	0.00838397	351/949	2
	GO:0034205	amyloid-beta formation	2018-01-04	20/17381	0.00459518	0.0303619	0.00838397	351	1
	GO:1901615	organic hydroxy compound metabolic process	2018-02-04	492/17381	0.00461967	0.0303619	0.00838397	351/949	2
	GO:0007617	mating behavior	2018-01-04	21/17381	0.00482453	0.0303619	0.00838397	351	1
	GO:0009595	detection of biotic stimulus	2018-01-04	21/17381	0.00482453	0.0303619	0.00838397	949	1
	GO:0010971	positive regulation of G2/M transition of mitotic cell cycle	2018-01-04	21/17381	0.00482453	0.0303619	0.00838397	351	1
	GO:0043032	positive regulation of macrophage activation	2018-01-04	21/17381	0.00482453	0.0303619	0.00838397	351	1
	GO:1902991	regulation of amyloid precursor protein catabolic process	2018-01-04	21/17381	0.00482453	0.0303619	0.00838397	351	1
	GO:0010884	positive regulation of lipid storage	2018-01-04	22/17381	0.00505383	0.0303619	0.00838397	949	1
	GO:0032469	endoplasmic reticulum calcium ion homeostasis	2018-01-04	22/17381	0.00505383	0.0303619	0.00838397	351	1
	GO:0001774	microglial cell activation	2018-01-04	23/17381	0.00528309	0.0303619	0.00838397	351	1
	GO:0007530	sex determination	2018-01-04	23/17381	0.00528309	0.0303619	0.00838397	367	1
	GO:0030539	male genitalia development	2018-01-04	23/17381	0.00528309	0.0303619	0.00838397	367	1
	GO:0060444	branching involved in mammary gland duct morphogenesis	2018-01-04	23/17381	0.00528309	0.0303619	0.00838397	367	1
	GO:0048668	collateral sprouting	2018-01-04	24/17381	0.00551232	0.0303619	0.00838397	351	1
	GO:1904646	cellular response to amyloid-beta	2018-01-04	24/17381	0.00551232	0.0303619	0.00838397	351	1
	GO:2000406	positive regulation of T cell migration	2018-01-04	24/17381	0.00551232	0.0303619	0.00838397	351	1
	GO:0032770	positive regulation of monooxygenase activity	2018-01-04	25/17381	0.0057415	0.0303619	0.00838397	949	1
	GO:0048169	regulation of long-term neuronal synaptic plasticity	2018-01-04	25/17381	0.0057415	0.0303619	0.00838397	351	1
	GO:1902751	positive regulation of cell cycle G2/M phase transition	2018-01-04	25/17381	0.0057415	0.0303619	0.00838397	351	1
	GO:0035235	ionotropic glutamate receptor signaling pathway	2018-01-04	26/17381	0.00597065	0.0303619	0.00838397	351	1
	GO:0043567	regulation of insulin-like growth factor receptor signaling pathway	2018-01-04	26/17381	0.00597065	0.0303619	0.00838397	367	1
	GO:0060571	morphogenesis of an epithelial fold	2018-01-04	26/17381	0.00597065	0.0303619	0.00838397	367	1
	GO:0060740	prostate gland epithelium morphogenesis	2018-01-04	26/17381	0.00597065	0.0303619	0.00838397	367	1
	GO:0006359	regulation of transcription from RNA polymerase III promoter	2018-01-04	27/17381	0.00619975	0.0303619	0.00838397	367	1
	GO:0006706	steroid catabolic process	2018-01-04	27/17381	0.00619975	0.0303619	0.00838397	949	1
	GO:0042346	positive regulation of NF-kappaB import into nucleus	2018-01-04	27/17381	0.00619975	0.0303619	0.00838397	351	1
	GO:0048710	regulation of astrocyte differentiation	2018-01-04	27/17381	0.00619975	0.0303619	0.00838397	351	1
	GO:1904645	response to amyloid-beta	2018-01-04	27/17381	0.00619975	0.0303619	0.00838397	351	1
	GO:0008209	androgen metabolic process	2018-01-04	28/17381	0.00642882	0.0303619	0.00838397	949	1
	GO:0014002	astrocyte development	2018-01-04	28/17381	0.00642882	0.0303619	0.00838397	351	1
	GO:0034367	macromolecular complex remodeling	2018-01-04	28/17381	0.00642882	0.0303619	0.00838397	949	1
	GO:0034368	protein-lipid complex remodeling	2018-01-04	28/17381	0.00642882	0.0303619	0.00838397	949	1
	GO:0034369	plasma lipoprotein particle remodeling	2018-01-04	28/17381	0.00642882	0.0303619	0.00838397	949	1
	GO:0060512	prostate gland morphogenesis	2018-01-04	28/17381	0.00642882	0.0303619	0.00838397	367	1
	GO:0007176	regulation of epidermal growth factor-activated receptor activity	2018-01-04	29/17381	0.00665784	0.0303619	0.00838397	351	1
	GO:0042987	amyloid precursor protein catabolic process	2018-01-04	29/17381	0.00665784	0.0303619	0.00838397	351	1
	GO:0061900	glial cell activation	2018-01-04	29/17381	0.00665784	0.0303619	0.00838397	351	1
	GO:2000403	positive regulation of lymphocyte migration	2018-01-04	29/17381	0.00665784	0.0303619	0.00838397	351	1
	GO:0003382	epithelial cell morphogenesis	2018-01-04	30/17381	0.00688683	0.0303619	0.00838397	367	1
	GO:0010092	specification of animal organ identity	2018-01-04	30/17381	0.00688683	0.0303619	0.00838397	367	1
	GO:0010800	positive regulation of peptidyl-threonine phosphorylation	2018-01-04	30/17381	0.00688683	0.0303619	0.00838397	351	1
	GO:0019098	reproductive behavior	2018-01-04	30/17381	0.00688683	0.0303619	0.00838397	351	1
	GO:0031128	developmental induction	2018-01-04	30/17381	0.00688683	0.0303619	0.00838397	367	1
	GO:1900271	regulation of long-term synaptic potentiation	2018-01-04	30/17381	0.00688683	0.0303619	0.00838397	351	1
	GO:0060603	mammary gland duct morphogenesis	2018-01-04	31/17381	0.00711578	0.0307409	0.00848862	367	1
	GO:2000404	regulation of T cell migration	2018-01-04	31/17381	0.00711578	0.0307409	0.00848862	351	1
	GO:0008038	neuron recognition	2018-01-04	32/17381	0.00734468	0.0307409	0.00848862	351	1
	GO:0050435	amyloid-beta metabolic process	2018-01-04	32/17381	0.00734468	0.0307409	0.00848862	351	1
	GO:0055090	acylglycerol homeostasis	2018-01-04	33/17381	0.00757355	0.0307409	0.00848862	949	1
	GO:0070328	triglyceride homeostasis	2018-01-04	33/17381	0.00757355	0.0307409	0.00848862	949	1
	GO:0003156	regulation of animal organ formation	2018-01-04	34/17381	0.00780238	0.0307409	0.00848862	367	1
	GO:0019432	triglyceride biosynthetic process	2018-01-04	34/17381	0.00780238	0.0307409	0.00848862	949	1
	GO:0034383	low-density lipoprotein particle clearance	2018-01-04	34/17381	0.00780238	0.0307409	0.00848862	949	1
	GO:0071868	cellular response to monoamine stimulus	2018-01-04	34/17381	0.00780238	0.0307409	0.00848862	351	1
	GO:0071870	cellular response to catecholamine stimulus	2018-01-04	34/17381	0.00780238	0.0307409	0.00848862	351	1
	GO:1905332	positive regulation of morphogenesis of an epithelium	2018-01-04	34/17381	0.00780238	0.0307409	0.00848862	367	1
	GO:0043277	apoptotic cell clearance	2018-01-04	35/17381	0.00803117	0.0307409	0.00848862	949	1
	GO:0045687	positive regulation of glial cell differentiation	2018-01-04	35/17381	0.00803117	0.0307409	0.00848862	351	1
	GO:0050892	intestinal absorption	2018-01-04	35/17381	0.00803117	0.0307409	0.00848862	949	1
	GO:0051180	vitamin transport	2018-01-04	35/17381	0.00803117	0.0307409	0.00848862	949	1
	GO:0090207	regulation of triglyceride metabolic process	2018-01-04	35/17381	0.00803117	0.0307409	0.00848862	949	1
	GO:0046460	neutral lipid biosynthetic process	2018-01-04	36/17381	0.00825992	0.0307409	0.00848862	949	1
	GO:0046463	acylglycerol biosynthetic process	2018-01-04	36/17381	0.00825992	0.0307409	0.00848862	949	1
	GO:0098815	modulation of excitatory postsynaptic potential	2018-01-04	36/17381	0.00825992	0.0307409	0.00848862	351	1
	GO:1900449	regulation of glutamate receptor signaling pathway	2018-01-04	36/17381	0.00825992	0.0307409	0.00848862	351	1
	GO:0009395	phospholipid catabolic process	2018-01-04	37/17381	0.00848862	0.0307409	0.00848862	949	1
	GO:0010453	regulation of cell fate commitment	2018-01-04	37/17381	0.00848862	0.0307409	0.00848862	367	1
	GO:0071867	response to monoamine	2018-01-04	37/17381	0.00848862	0.0307409	0.00848862	351	1
	GO:0071869	response to catecholamine	2018-01-04	37/17381	0.00848862	0.0307409	0.00848862	351	1
	GO:0007618	mating	2018-01-04	38/17381	0.00871729	0.0309068	0.00853441	351	1
	GO:0030225	macrophage differentiation	2018-01-04	38/17381	0.00871729	0.0309068	0.00853441	351	1
	GO:0040019	positive regulation of embryonic development	2018-01-04	38/17381	0.00871729	0.0309068	0.00853441	367	1
	GO:0033146	regulation of intracellular estrogen receptor signaling pathway	2018-01-04	39/17381	0.00894592	0.0310656	0.00857828	367	1
	GO:0043030	regulation of macrophage activation	2018-01-04	39/17381	0.00894592	0.0310656	0.00857828	351	1
	GO:0048009	insulin-like growth factor receptor signaling pathway	2018-01-04	39/17381	0.00894592	0.0310656	0.00857828	367	1
	GO:0006378	mRNA polyadenylation	2018-01-04	41/17381	0.00940307	0.0319957	0.00883509	351	1
	GO:0042551	neuron maturation	2018-01-04	41/17381	0.00940307	0.0319957	0.00883509	351	1
	GO:0099601	regulation of neurotransmitter receptor activity	2018-01-04	41/17381	0.00940307	0.0319957	0.00883509	351	1
	GO:0010799	regulation of peptidyl-threonine phosphorylation	2018-01-04	42/17381	0.00963158	0.0322519	0.00890585	351	1
	GO:0010883	regulation of lipid storage	2018-01-04	42/17381	0.00963158	0.0322519	0.00890585	949	1
	GO:0007528	neuromuscular junction development	2018-01-04	43/17381	0.00986005	0.0322519	0.00890585	351	1
	GO:0042982	amyloid precursor protein metabolic process	2018-01-04	43/17381	0.00986005	0.0322519	0.00890585	351	1
	GO:0043631	RNA polyadenylation	2018-01-04	43/17381	0.00986005	0.0322519	0.00890585	351	1
	GO:1901224	positive regulation of NIK/NF-kappaB signaling	2018-01-04	43/17381	0.00986005	0.0322519	0.00890585	351	1
	GO:0033574	response to testosterone	2018-01-04	44/17381	0.0100885	0.0323502	0.00893299	367	1
	GO:0050999	regulation of nitric-oxide synthase activity	2018-01-04	44/17381	0.0100885	0.0323502	0.00893299	949	1
	GO:0051353	positive regulation of oxidoreductase activity	2018-01-04	45/17381	0.0103169	0.0323502	0.00893299	949	1
	GO:0060443	mammary gland morphogenesis	2018-01-04	45/17381	0.0103169	0.0323502	0.00893299	367	1
	GO:0071827	plasma lipoprotein particle organization	2018-01-04	45/17381	0.0103169	0.0323502	0.00893299	949	1
	GO:0042993	positive regulation of transcription factor import into nucleus	2018-01-04	46/17381	0.0105452	0.0323502	0.00893299	351	1
	GO:0046164	alcohol catabolic process	2018-01-04	46/17381	0.0105452	0.0323502	0.00893299	949	1
	GO:1990090	cellular response to nerve growth factor stimulus	2018-01-04	46/17381	0.0105452	0.0323502	0.00893299	351	1
	GO:2000401	regulation of lymphocyte migration	2018-01-04	46/17381	0.0105452	0.0323502	0.00893299	351	1
	GO:0008088	axo-dendritic transport	2018-01-04	47/17381	0.0107735	0.0323502	0.00893299	351	1
	GO:0033344	cholesterol efflux	2018-01-04	47/17381	0.0107735	0.0323502	0.00893299	949	1
	GO:0048806	genitalia development	2018-01-04	47/17381	0.0107735	0.0323502	0.00893299	367	1
	GO:0008542	visual learning	2018-01-04	48/17381	0.0110018	0.0323502	0.00893299	351	1
	GO:0030850	prostate gland development	2018-01-04	48/17381	0.0110018	0.0323502	0.00893299	367	1
	GO:0071825	protein-lipid complex subunit organization	2018-01-04	48/17381	0.0110018	0.0323502	0.00893299	949	1
	GO:0042345	regulation of NF-kappaB import into nucleus	2018-01-04	49/17381	0.01123	0.0323502	0.00893299	351	1
	GO:0042348	NF-kappaB import into nucleus	2018-01-04	49/17381	0.01123	0.0323502	0.00893299	351	1
	GO:0050885	neuromuscular process controlling balance	2018-01-04	49/17381	0.01123	0.0323502	0.00893299	351	1
	GO:0071320	cellular response to cAMP	2018-01-04	49/17381	0.01123	0.0323502	0.00893299	351	1
	GO:0072678	T cell migration	2018-01-04	49/17381	0.01123	0.0323502	0.00893299	351	1
	GO:1990089	response to nerve growth factor	2018-01-04	49/17381	0.01123	0.0323502	0.00893299	351	1
	GO:0048168	regulation of neuronal synaptic plasticity	2018-01-04	51/17381	0.0116864	0.0332865	0.00919155	351	1
	GO:0050994	regulation of lipid catabolic process	2018-01-04	51/17381	0.0116864	0.0332865	0.00919155	949	1
	GO:0007632	visual behavior	2018-01-04	53/17381	0.0121426	0.0340127	0.00939206	351	1
	GO:0031663	lipopolysaccharide-mediated signaling pathway	2018-01-04	53/17381	0.0121426	0.0340127	0.00939206	949	1
	GO:0060688	regulation of morphogenesis of a branching structure	2018-01-04	53/17381	0.0121426	0.0340127	0.00939206	367	1
	GO:0006383	transcription from RNA polymerase III promoter	2018-01-04	54/17381	0.0123706	0.0342727	0.00946387	367	1
	GO:0014015	positive regulation of gliogenesis	2018-01-04	54/17381	0.0123706	0.0342727	0.00946387	351	1
	GO:0032768	regulation of monooxygenase activity	2018-01-04	55/17381	0.0125986	0.0345271	0.0095341	949	1
	GO:2000243	positive regulation of reproductive process	2018-01-04	55/17381	0.0125986	0.0345271	0.0095341	367	1
	GO:0034381	plasma lipoprotein particle clearance	2018-01-04	56/17381	0.0128266	0.0347758	0.00960279	949	1
	GO:0046503	glycerolipid catabolic process	2018-01-04	56/17381	0.0128266	0.0347758	0.00960279	949	1
	GO:0006910	phagocytosis, recognition	2018-01-04	58/17381	0.0132824	0.0356305	0.0098388	949	1
	GO:0030520	intracellular estrogen receptor signaling pathway	2018-01-04	58/17381	0.0132824	0.0356305	0.0098388	367	1
	GO:0048645	animal organ formation	2018-01-04	60/17381	0.013738	0.036277	0.0100173	367	1
	GO:0060135	maternal process involved in female pregnancy	2018-01-04	60/17381	0.013738	0.036277	0.0100173	367	1
	GO:1901222	regulation of NIK/NF-kappaB signaling	2018-01-04	60/17381	0.013738	0.036277	0.0100173	351	1
	GO:0045685	regulation of glial cell differentiation	2018-01-04	61/17381	0.0139658	0.0364982	0.0100784	351	1
	GO:0061515	myeloid cell development	2018-01-04	61/17381	0.0139658	0.0364982	0.0100784	351	1
	GO:0019915	lipid storage	2018-01-04	63/17381	0.0144212	0.0373038	0.0103009	949	1
	GO:1901616	organic hydroxy compound catabolic process	2018-01-04	63/17381	0.0144212	0.0373038	0.0103009	949	1
	GO:0015914	phospholipid transport	2018-01-04	64/17381	0.0146488	0.0373706	0.0103193	949	1
	GO:0046889	positive regulation of lipid biosynthetic process	2018-01-04	64/17381	0.0146488	0.0373706	0.0103193	949	1
	GO:0042116	macrophage activation	2018-01-04	65/17381	0.0148764	0.0373706	0.0103193	351	1
	GO:1901264	carbohydrate derivative transport	2018-01-04	65/17381	0.0148764	0.0373706	0.0103193	949	1
	GO:0048708	astrocyte differentiation	2018-01-04	66/17381	0.015104	0.0373706	0.0103193	351	1
	GO:0060291	long-term synaptic potentiation	2018-01-04	66/17381	0.015104	0.0373706	0.0103193	351	1
	GO:0061180	mammary gland epithelium development	2018-01-04	66/17381	0.015104	0.0373706	0.0103193	367	1
	GO:1903725	regulation of phospholipid metabolic process	2018-01-04	66/17381	0.015104	0.0373706	0.0103193	949	1
	GO:0030521	androgen receptor signaling pathway	2018-01-04	67/17381	0.0153315	0.0373706	0.0103193	367	1
	GO:0040014	regulation of multicellular organism growth	2018-01-04	67/17381	0.0153315	0.0373706	0.0103193	351	1
	GO:0042446	hormone biosynthetic process	2018-01-04	67/17381	0.0153315	0.0373706	0.0103193	949	1
	GO:0051705	multi-organism behavior	2018-01-04	67/17381	0.0153315	0.0373706	0.0103193	351	1
	GO:0050764	regulation of phagocytosis	2018-01-04	68/17381	0.015559	0.0377436	0.0104223	949	1
	GO:1901992	positive regulation of mitotic cell cycle phase transition	2018-01-04	70/17381	0.0160139	0.038662	0.0106759	351	1
	GO:0008306	associative learning	2018-01-04	72/17381	0.0164686	0.0393847	0.0108755	351	1
	GO:0106027	neuron projection organization	2018-01-04	72/17381	0.0164686	0.0393847	0.0108755	351	1
	GO:0061097	regulation of protein tyrosine kinase activity	2018-01-04	74/17381	0.0169231	0.0400701	0.0110647	351	1
	GO:0007009	plasma membrane organization	2018-01-04	75/17381	0.0171503	0.0400701	0.0110647	367	1
	GO:0033143	regulation of intracellular steroid hormone receptor signaling pathway	2018-01-04	75/17381	0.0171503	0.0400701	0.0110647	367	1
	GO:0042632	cholesterol homeostasis	2018-01-04	75/17381	0.0171503	0.0400701	0.0110647	949	1
	GO:0055092	sterol homeostasis	2018-01-04	75/17381	0.0171503	0.0400701	0.0110647	949	1
	GO:1905954	positive regulation of lipid localization	2018-01-04	76/17381	0.0173775	0.0404146	0.0111598	949	1
	GO:0008344	adult locomotory behavior	2018-01-04	77/17381	0.0176046	0.0407559	0.0112541	351	1
	GO:0007215	glutamate receptor signaling pathway	2018-01-04	78/17381	0.0178317	0.0410939	0.0113474	351	1
	GO:1903076	regulation of protein localization to plasma membrane	2018-01-04	79/17381	0.0180587	0.0414289	0.0114399	367	1
	GO:0010595	positive regulation of endothelial cell migration	2018-01-04	80/17381	0.0182858	0.0415734	0.0114798	949	1
	GO:0046470	phosphatidylcholine metabolic process	2018-01-04	80/17381	0.0182858	0.0415734	0.0114798	949	1
	GO:0001708	cell fate specification	2018-01-04	83/17381	0.0189666	0.0429288	0.0118541	367	1
	GO:0030301	cholesterol transport	2018-01-04	84/17381	0.0191934	0.0430578	0.0118897	949	1
	GO:1901989	positive regulation of cell cycle phase transition	2018-01-04	84/17381	0.0191934	0.0430578	0.0118897	351	1
	GO:0042058	regulation of epidermal growth factor receptor signaling pathway	2018-01-04	86/17381	0.019647	0.0436688	0.0120584	351	1
	GO:1901655	cellular response to ketone	2018-01-04	86/17381	0.019647	0.0436688	0.0120584	367	1
	GO:0021782	glial cell development	2018-01-04	87/17381	0.0198737	0.0436688	0.0120584	351	1
	GO:1904375	regulation of protein localization to cell periphery	2018-01-04	87/17381	0.0198737	0.0436688	0.0120584	367	1
	GO:0051341	regulation of oxidoreductase activity	2018-01-04	88/17381	0.0201004	0.0436688	0.0120584	949	1
	GO:0003073	regulation of systemic arterial blood pressure	2018-01-04	89/17381	0.0203271	0.0436688	0.0120584	367	1
	GO:0032092	positive regulation of protein binding	2018-01-04	89/17381	0.0203271	0.0436688	0.0120584	351	1
	GO:0042990	regulation of transcription factor import into nucleus	2018-01-04	89/17381	0.0203271	0.0436688	0.0120584	351	1
	GO:0060996	dendritic spine development	2018-01-04	89/17381	0.0203271	0.0436688	0.0120584	10298	1
	GO:0097006	regulation of plasma lipoprotein particle levels	2018-01-04	89/17381	0.0203271	0.0436688	0.0120584	949	1
	GO:0015748	organophosphate ester transport	2018-01-04	90/17381	0.0205537	0.0437846	0.0120904	949	1
	GO:0031124	mRNA 3'-end processing	2018-01-04	90/17381	0.0205537	0.0437846	0.0120904	351	1
	GO:0015918	sterol transport	2018-01-04	91/17381	0.0207803	0.0438984	0.0121218	949	1
	GO:0042991	transcription factor import into nucleus	2018-01-04	91/17381	0.0207803	0.0438984	0.0121218	351	1
	GO:0072676	lymphocyte migration	2018-01-04	92/17381	0.0210068	0.0441928	0.0122031	351	1
	GO:0022600	digestive system process	2018-01-04	94/17381	0.0214598	0.0449592	0.0124148	949	1
	GO:0051591	response to cAMP	2018-01-04	96/17381	0.0219126	0.0457189	0.0126245	351	1
	GO:0043534	blood vessel endothelial cell migration	2018-01-04	97/17381	0.0221389	0.0458141	0.0126508	949	1
	GO:0050905	neuromuscular process	2018-01-04	97/17381	0.0221389	0.0458141	0.0126508	351	1
	GO:0006641	triglyceride metabolic process	2018-01-04	98/17381	0.0223652	0.0459076	0.0126767	949	1
	GO:0042307	positive regulation of protein import into nucleus	2018-01-04	98/17381	0.0223652	0.0459076	0.0126767	351	1
	GO:1901184	regulation of ERBB signaling pathway	2018-01-04	99/17381	0.0225915	0.0461851	0.0127533	351	1
	GO:1904591	positive regulation of protein import	2018-01-04	100/17381	0.0228177	0.0464602	0.0128293	351	1
	GO:0060079	excitatory postsynaptic potential	2018-01-04	101/17381	0.0230439	0.0467331	0.0129046	351	1
	GO:0033138	positive regulation of peptidyl-serine phosphorylation	2018-01-04	102/17381	0.0232701	0.0468172	0.0129278	351	1
	GO:0046916	cellular transition metal ion homeostasis	2018-01-04	102/17381	0.0232701	0.0468172	0.0129278	351	1
	GO:0014013	regulation of gliogenesis	2018-01-04	103/17381	0.0234962	0.0468999	0.0129507	351	1
	GO:2001237	negative regulation of extrinsic apoptotic signaling pathway	2018-01-04	103/17381	0.0234962	0.0468999	0.0129507	367	1
	GO:0007631	feeding behavior	2018-01-04	110/17381	0.0250778	0.0498606	0.0137682	351	1
Module 9	GO:0060039	pericardium development	2018-02-05	20/17381	1.25533e-05	0.00436856	0.00145354	4040/29072	2
	GO:0001843	neural tube closure	2018-02-05	87/17381	0.000245267	0.0234639	0.00780712	4040/29072	2
	GO:0060606	tube closure	2018-02-05	88/17381	0.000250942	0.0234639	0.00780712	4040/29072	2
	GO:0014020	primary neural tube formation	2018-02-05	94/17381	0.00028634	0.0234639	0.00780712	4040/29072	2
	GO:0001841	neural tube formation	2018-02-05	102/17381	0.000337126	0.0234639	0.00780712	4040/29072	2
	GO:0001838	embryonic epithelial tube formation	2018-02-05	122/17381	0.000481962	0.0271945	0.00904837	4040/29072	2
	GO:0072175	epithelial tube formation	2018-02-05	130/17381	0.000547015	0.0271945	0.00904837	4040/29072	2
	GO:0035148	tube formation	2018-02-05	144/17381	0.000670598	0.0273828	0.00911105	4040/29072	2
	GO:0016331	morphogenesis of embryonic epithelium	2018-02-05	148/17381	0.000708177	0.0273828	0.00911105	4040/29072	2
	GO:0021915	neural tube development	2018-02-05	158/17381	0.000806525	0.0280671	0.00933871	4040/29072	2
	GO:0007369	gastrulation	2018-02-05	187/17381	0.00112709	0.035657	0.0118641	4040/29072	2
	GO:0060485	mesenchyme development	2018-02-05	246/17381	0.00193972	0.0386074	0.0128458	4040/2065	2
	GO:0048863	stem cell differentiation	2018-02-05	261/17381	0.0021802	0.0386074	0.0128458	4040/29072	2
	GO:1901214	regulation of neuron death	2018-02-05	280/17381	0.0025043	0.0386074	0.0128458	23368/2065	2
	GO:0010452	histone H3-K36 methylation	2018-01-05	10/17381	0.00287373	0.0386074	0.0128458	29072	1
	GO:0060562	epithelial tube morphogenesis	2018-02-05	310/17381	0.00306008	0.0386074	0.0128458	4040/29072	2
	GO:0035461	vitamin transmembrane transport	2018-01-05	11/17381	0.00316074	0.0386074	0.0128458	4363	1
	GO:0060439	trachea morphogenesis	2018-01-05	11/17381	0.00316074	0.0386074	0.0128458	4040	1
	GO:0090009	primitive streak formation	2018-01-05	11/17381	0.00316074	0.0386074	0.0128458	4040	1
	GO:0070997	neuron death	2018-02-05	316/17381	0.00317766	0.0386074	0.0128458	23368/2065	2
	GO:0014029	neural crest formation	2018-01-05	12/17381	0.00344768	0.0386074	0.0128458	4040	1
	GO:0021903	rostrocaudal neural tube patterning	2018-01-05	12/17381	0.00344768	0.0386074	0.0128458	4040	1
	GO:0060536	cartilage morphogenesis	2018-01-05	12/17381	0.00344768	0.0386074	0.0128458	4040	1
	GO:1904953	Wnt signaling pathway involved in midbrain dopaminergic neuron differentiation	2018-01-05	12/17381	0.00344768	0.0386074	0.0128458	4040	1
	GO:0046831	regulation of RNA export from nucleus	2018-01-05	13/17381	0.00373455	0.0386074	0.0128458	29072	1
	GO:0071397	cellular response to cholesterol	2018-01-05	13/17381	0.00373455	0.0386074	0.0128458	4040	1
	GO:0099133	ATP hydrolysis coupled anion transmembrane transport	2018-01-05	13/17381	0.00373455	0.0386074	0.0128458	4363	1
	GO:0006869	lipid transport	2018-02-05	347/17381	0.00381902	0.0386074	0.0128458	4040/4363	2
	GO:0035239	tube morphogenesis	2018-02-05	347/17381	0.00381902	0.0386074	0.0128458	4040/29072	2
	GO:0035112	genitalia morphogenesis	2018-01-05	14/17381	0.00402137	0.0386074	0.0128458	4040	1
	GO:0030900	forebrain development	2018-02-05	366/17381	0.00423995	0.0386074	0.0128458	4040/29072	2
	GO:0018027	peptidyl-lysine dimethylation	2018-01-05	15/17381	0.00430811	0.0386074	0.0128458	29072	1
	GO:0021794	thalamus development	2018-01-05	15/17381	0.00430811	0.0386074	0.0128458	4040	1
	GO:0032239	regulation of nucleobase-containing compound transport	2018-01-05	15/17381	0.00430811	0.0386074	0.0128458	29072	1
	GO:0060026	convergent extension	2018-01-05	15/17381	0.00430811	0.0386074	0.0128458	4040	1
	GO:0010876	lipid localization	2018-02-05	380/17381	0.00456354	0.0386074	0.0128458	4040/4363	2
	GO:0009950	dorsal/ventral axis specification	2018-01-05	16/17381	0.00459479	0.0386074	0.0128458	4040	1
	GO:0036315	cellular response to sterol	2018-01-05	16/17381	0.00459479	0.0386074	0.0128458	4040	1
	GO:0032366	intracellular sterol transport	2018-01-05	17/17381	0.0048814	0.0386074	0.0128458	4040	1
	GO:0032367	intracellular cholesterol transport	2018-01-05	17/17381	0.0048814	0.0386074	0.0128458	4040	1
	GO:0060977	coronary vasculature morphogenesis	2018-01-05	17/17381	0.0048814	0.0386074	0.0128458	29072	1
	GO:0070884	regulation of calcineurin-NFAT signaling cascade	2018-01-05	17/17381	0.0048814	0.0386074	0.0128458	2065	1
	GO:0106056	regulation of calcineurin-mediated signaling	2018-01-05	17/17381	0.0048814	0.0386074	0.0128458	2065	1
	GO:1904948	midbrain dopaminergic neuron differentiation	2018-01-05	17/17381	0.0048814	0.0386074	0.0128458	4040	1
	GO:0072337	modified amino acid transport	2018-01-05	18/17381	0.00516795	0.0388419	0.0129238	4363	1
	GO:0060438	trachea development	2018-01-05	19/17381	0.00545443	0.0388419	0.0129238	4040	1
	GO:0034390	smooth muscle cell apoptotic process	2018-01-05	20/17381	0.00574084	0.0388419	0.0129238	4040	1
	GO:0034391	regulation of smooth muscle cell apoptotic process	2018-01-05	20/17381	0.00574084	0.0388419	0.0129238	4040	1
	GO:0048608	reproductive structure development	2018-02-05	429/17381	0.00578499	0.0388419	0.0129238	4040/29072	2
	GO:0061458	reproductive system development	2018-02-05	432/17381	0.00586423	0.0388419	0.0129238	4040/29072	2
	GO:0009235	cobalamin metabolic process	2018-01-05	21/17381	0.00602719	0.0388419	0.0129238	4363	1
	GO:0032727	positive regulation of interferon-alpha production	2018-01-05	21/17381	0.00602719	0.0388419	0.0129238	29072	1
	GO:0070723	response to cholesterol	2018-01-05	21/17381	0.00602719	0.0388419	0.0129238	4040	1
	GO:0071168	protein localization to chromatin	2018-01-05	21/17381	0.00602719	0.0388419	0.0129238	29072	1
	GO:0006855	drug transmembrane transport	2018-01-05	22/17381	0.00631347	0.0392337	0.0130542	4363	1
	GO:1904886	beta-catenin destruction complex disassembly	2018-01-05	22/17381	0.00631347	0.0392337	0.0130542	4040	1
	GO:0045332	phospholipid translocation	2018-01-05	23/17381	0.00659969	0.0402928	0.0134066	4363	1
	GO:0034204	lipid translocation	2018-01-05	24/17381	0.00688584	0.0406148	0.0135137	4363	1
	GO:0036314	response to sterol	2018-01-05	24/17381	0.00688584	0.0406148	0.0135137	4040	1
	GO:0033173	calcineurin-NFAT signaling cascade	2018-01-05	25/17381	0.00717193	0.0413404	0.0137551	2065	1
	GO:0060669	embryonic placenta morphogenesis	2018-01-05	26/17381	0.00745794	0.0413404	0.0137551	29072	1
	GO:0001501	skeletal system development	2018-02-05	491/17381	0.00752557	0.0413404	0.0137551	4040/29072	2
	GO:0032647	regulation of interferon-alpha production	2018-01-05	27/17381	0.0077439	0.0413404	0.0137551	29072	1
	GO:0001702	gastrulation with mouth forming second	2018-01-05	28/17381	0.00802978	0.0413404	0.0137551	4040	1
	GO:0010569	regulation of double-strand break repair via homologous recombination	2018-01-05	28/17381	0.00802978	0.0413404	0.0137551	29072	1
	GO:0032607	interferon-alpha production	2018-01-05	28/17381	0.00802978	0.0413404	0.0137551	29072	1
	GO:0097720	calcineurin-mediated signaling	2018-01-05	28/17381	0.00802978	0.0413404	0.0137551	2065	1
	GO:0015893	drug transport	2018-01-05	29/17381	0.0083156	0.0413404	0.0137551	4363	1
	GO:1900739	regulation of protein insertion into mitochondrial membrane involved in apoptotic signaling pathway	2018-01-05	29/17381	0.0083156	0.0413404	0.0137551	23368	1
	GO:1900740	positive regulation of protein insertion into mitochondrial membrane involved in apoptotic signaling pathway	2018-01-05	29/17381	0.0083156	0.0413404	0.0137551	23368	1
	GO:0003401	axis elongation	2018-01-05	30/17381	0.00860136	0.0415732	0.0138326	4040	1
	GO:0032365	intracellular lipid transport	2018-01-05	30/17381	0.00860136	0.0415732	0.0138326	4040	1
	GO:0001844	protein insertion into mitochondrial membrane involved in apoptotic signaling pathway	2018-01-05	31/17381	0.00888705	0.0423657	0.0140963	23368	1
	GO:0006691	leukotriene metabolic process	2018-01-05	32/17381	0.00917267	0.0424089	0.0141107	4363	1
	GO:0060325	face morphogenesis	2018-01-05	32/17381	0.00917267	0.0424089	0.0141107	4040	1
	GO:0051204	protein insertion into mitochondrial membrane	2018-01-05	33/17381	0.00945823	0.0424089	0.0141107	23368	1
	GO:0014037	Schwann cell differentiation	2018-01-05	34/17381	0.00974372	0.0424089	0.0141107	2065	1
	GO:0051180	vitamin transport	2018-01-05	35/17381	0.0100291	0.0424089	0.0141107	4363	1
	GO:0072348	sulfur compound transport	2018-01-05	35/17381	0.0100291	0.0424089	0.0141107	4363	1
	GO:0006298	mismatch repair	2018-01-05	36/17381	0.0103145	0.0424089	0.0141107	29072	1
	GO:0021587	cerebellum morphogenesis	2018-01-05	36/17381	0.0103145	0.0424089	0.0141107	4040	1
	GO:0048016	inositol phosphate-mediated signaling	2018-01-05	36/17381	0.0103145	0.0424089	0.0141107	2065	1
	GO:0018023	peptidyl-lysine trimethylation	2018-01-05	37/17381	0.0105998	0.0424089	0.0141107	29072	1
	GO:0071542	dopaminergic neuron differentiation	2018-01-05	37/17381	0.0105998	0.0424089	0.0141107	4040	1
	GO:1901030	positive regulation of mitochondrial outer membrane permeabilization involved in apoptotic signaling pathway	2018-01-05	37/17381	0.0105998	0.0424089	0.0141107	23368	1
	GO:1901998	toxin transport	2018-01-05	37/17381	0.0105998	0.0424089	0.0141107	4040	1
	GO:0050850	positive regulation of calcium-mediated signaling	2018-01-05	38/17381	0.010885	0.0424089	0.0141107	2065	1
	GO:0060323	head morphogenesis	2018-01-05	38/17381	0.010885	0.0424089	0.0141107	4040	1
	GO:0003197	endocardial cushion development	2018-01-05	39/17381	0.0111702	0.0424089	0.0141107	2065	1
	GO:0038128	ERBB2 signaling pathway	2018-01-05	39/17381	0.0111702	0.0424089	0.0141107	2065	1
	GO:0097035	regulation of membrane lipid distribution	2018-01-05	39/17381	0.0111702	0.0424089	0.0141107	4363	1
	GO:0021532	neural tube patterning	2018-01-05	40/17381	0.0114553	0.0424089	0.0141107	4040	1
	GO:0021575	hindbrain morphogenesis	2018-01-05	40/17381	0.0114553	0.0424089	0.0141107	4040	1
	GO:0046825	regulation of protein export from nucleus	2018-01-05	40/17381	0.0114553	0.0424089	0.0141107	29072	1
	GO:0061098	positive regulation of protein tyrosine kinase activity	2018-01-05	43/17381	0.0123102	0.0450942	0.0150041	2065	1
	GO:0048701	embryonic cranial skeleton morphogenesis	2018-01-05	45/17381	0.0128798	0.0454398	0.0151191	29072	1
	GO:0060976	coronary vasculature development	2018-01-05	45/17381	0.0128798	0.0454398	0.0151191	29072	1
	GO:0035987	endodermal cell differentiation	2018-01-05	46/17381	0.0131645	0.0454398	0.0151191	29072	1
	GO:1901028	regulation of mitochondrial outer membrane permeabilization involved in apoptotic signaling pathway	2018-01-05	46/17381	0.0131645	0.0454398	0.0151191	23368	1
	GO:0010656	negative regulation of muscle cell apoptotic process	2018-01-05	47/17381	0.0134491	0.0454398	0.0151191	4040	1
	GO:0048806	genitalia development	2018-01-05	47/17381	0.0134491	0.0454398	0.0151191	4040	1
	GO:0051205	protein insertion into membrane	2018-01-05	47/17381	0.0134491	0.0454398	0.0151191	23368	1
	GO:0060042	retina morphogenesis in camera-type eye	2018-01-05	47/17381	0.0134491	0.0454398	0.0151191	4040	1
	GO:0021545	cranial nerve development	2018-01-05	49/17381	0.0140182	0.0469071	0.0156073	2065	1
	GO:0060324	face development	2018-01-05	50/17381	0.0143026	0.047403	0.0157723	4040	1
	GO:0009948	anterior/posterior axis specification	2018-01-05	51/17381	0.014587	0.0474419	0.0157853	4040	1
	GO:0010171	body morphogenesis	2018-01-05	51/17381	0.014587	0.0474419	0.0157853	4040	1
	GO:0002011	morphogenesis of an epithelial sheet	2018-01-05	53/17381	0.0151556	0.0483866	0.0160996	4040	1
	GO:2000779	regulation of double-strand break repair	2018-01-05	53/17381	0.0151556	0.0483866	0.0160996	29072	1
	GO:0097345	mitochondrial outer membrane permeabilization	2018-01-05	54/17381	0.0154397	0.0488457	0.0162524	23368	1
	GO:0001706	endoderm formation	2018-01-05	55/17381	0.0157239	0.0492964	0.0164023	29072	1
	GO:1901185	negative regulation of ERBB signaling pathway	2018-01-05	56/17381	0.0160079	0.0493007	0.0164037	2065	1
	GO:0033013	tetrapyrrole metabolic process	2018-01-05	57/17381	0.0162919	0.0493007	0.0164037	4363	1
	GO:0055025	positive regulation of cardiac muscle tissue development	2018-01-05	57/17381	0.0162919	0.0493007	0.0164037	2065	1
	GO:0097306	cellular response to alcohol	2018-01-05	57/17381	0.0162919	0.0493007	0.0164037	4040	1
Module 10	GO:0061051	positive regulation of cell growth involved in cardiac muscle cell development	2018-01-02	13/17381	0.00149537	0.033729	0.00188102	5300	1
	GO:0061050	regulation of cell growth involved in cardiac muscle cell development	2018-01-02	19/17381	0.00218516	0.033729	0.00188102	5300	1
	GO:2000727	positive regulation of cardiac muscle cell differentiation	2018-01-02	27/17381	0.00310452	0.033729	0.00188102	5300	1
	GO:0003298	physiological muscle hypertrophy	2018-01-02	32/17381	0.0036789	0.033729	0.00188102	5300	1
	GO:0003301	physiological cardiac muscle hypertrophy	2018-01-02	32/17381	0.0036789	0.033729	0.00188102	5300	1
	GO:0061049	cell growth involved in cardiac muscle cell development	2018-01-02	32/17381	0.0036789	0.033729	0.00188102	5300	1
	GO:0035307	positive regulation of protein dephosphorylation	2018-01-02	36/17381	0.00413828	0.033729	0.00188102	5300	1
	GO:0010613	positive regulation of cardiac muscle hypertrophy	2018-01-02	37/17381	0.00425311	0.033729	0.00188102	5300	1
	GO:0014742	positive regulation of muscle hypertrophy	2018-01-02	37/17381	0.00425311	0.033729	0.00188102	5300	1
	GO:1905209	positive regulation of cardiocyte differentiation	2018-01-02	38/17381	0.00436794	0.033729	0.00188102	5300	1
	GO:0000413	protein peptidyl-prolyl isomerization	2018-01-02	39/17381	0.00448275	0.033729	0.00188102	5300	1
	GO:2000725	regulation of cardiac muscle cell differentiation	2018-01-02	43/17381	0.00494195	0.033729	0.00188102	5300	1
	GO:0055023	positive regulation of cardiac muscle tissue growth	2018-01-02	44/17381	0.00505674	0.033729	0.00188102	5300	1
	GO:0035306	positive regulation of dephosphorylation	2018-01-02	48/17381	0.0055158	0.033729	0.00188102	5300	1
	GO:0060421	positive regulation of heart growth	2018-01-02	48/17381	0.0055158	0.033729	0.00188102	5300	1
	GO:0032480	negative regulation of type I interferon production	2018-01-02	49/17381	0.00563055	0.033729	0.00188102	5300	1
	GO:0043525	positive regulation of neuron apoptotic process	2018-01-02	49/17381	0.00563055	0.033729	0.00188102	5300	1
	GO:0018208	peptidyl-proline modification	2018-01-02	54/17381	0.00620421	0.033729	0.00188102	5300	1
	GO:0055025	positive regulation of cardiac muscle tissue development	2018-01-02	57/17381	0.00654832	0.033729	0.00188102	5300	1
	GO:1905207	regulation of cardiocyte differentiation	2018-01-02	58/17381	0.00666301	0.033729	0.00188102	5300	1
	GO:0046622	positive regulation of organ growth	2018-01-02	59/17381	0.00677769	0.033729	0.00188102	5300	1
	GO:0060393	regulation of pathway-restricted SMAD protein phosphorylation	2018-01-02	60/17381	0.00689237	0.033729	0.00188102	5300	1
	GO:0010611	regulation of cardiac muscle hypertrophy	2018-01-02	63/17381	0.00723636	0.033729	0.00188102	5300	1
	GO:0060389	pathway-restricted SMAD protein phosphorylation	2018-01-02	63/17381	0.00723636	0.033729	0.00188102	5300	1
	GO:0070373	negative regulation of ERK1 and ERK2 cascade	2018-01-02	64/17381	0.00735102	0.033729	0.00188102	5300	1
	GO:0014743	regulation of muscle hypertrophy	2018-01-02	65/17381	0.00746566	0.033729	0.00188102	5300	1
	GO:0032465	regulation of cytokinesis	2018-01-02	66/17381	0.0075803	0.033729	0.00188102	5300	1
	GO:0035304	regulation of protein dephosphorylation	2018-01-02	67/17381	0.00769493	0.033729	0.00188102	5300	1
	GO:0055021	regulation of cardiac muscle tissue growth	2018-01-02	68/17381	0.00780955	0.033729	0.00188102	5300	1
	GO:0030512	negative regulation of transforming growth factor beta receptor signaling pathway	2018-01-02	70/17381	0.00803878	0.033729	0.00188102	5300	1
	GO:0051155	positive regulation of striated muscle cell differentiation	2018-01-02	70/17381	0.00803878	0.033729	0.00188102	5300	1
	GO:0055013	cardiac muscle cell development	2018-01-02	71/17381	0.00815339	0.033729	0.00188102	5300	1
	GO:1903845	negative regulation of cellular response to transforming growth factor beta stimulus	2018-01-02	72/17381	0.00826799	0.033729	0.00188102	5300	1
	GO:0060420	regulation of heart growth	2018-01-02	73/17381	0.00838258	0.033729	0.00188102	5300	1
	GO:0055006	cardiac cell development	2018-01-02	77/17381	0.00884088	0.033729	0.00188102	5300	1
	GO:1901216	positive regulation of neuron death	2018-01-02	78/17381	0.00895544	0.033729	0.00188102	5300	1
	GO:0045844	positive regulation of striated muscle tissue development	2018-01-02	81/17381	0.00929907	0.033729	0.00188102	5300	1
	GO:0048636	positive regulation of muscle organ development	2018-01-02	81/17381	0.00929907	0.033729	0.00188102	5300	1
	GO:1901863	positive regulation of muscle tissue development	2018-01-02	82/17381	0.0094136	0.033729	0.00188102	5300	1
	GO:0055024	regulation of cardiac muscle tissue development	2018-01-02	90/17381	0.0103296	0.033729	0.00188102	5300	1
	GO:0043502	regulation of muscle adaptation	2018-01-02	91/17381	0.0104441	0.033729	0.00188102	5300	1
	GO:0048010	vascular endothelial growth factor receptor signaling pathway	2018-01-02	92/17381	0.0105586	0.033729	0.00188102	63916	1
	GO:0032091	negative regulation of protein binding	2018-01-02	94/17381	0.0107875	0.033729	0.00188102	5300	1
	GO:0055017	cardiac muscle tissue growth	2018-01-02	94/17381	0.0107875	0.033729	0.00188102	5300	1
	GO:0003300	cardiac muscle hypertrophy	2018-01-02	95/17381	0.0109019	0.033729	0.00188102	5300	1
	GO:0014897	striated muscle hypertrophy	2018-01-02	97/17381	0.0111308	0.033729	0.00188102	5300	1
	GO:0014896	muscle hypertrophy	2018-01-02	99/17381	0.0113596	0.033729	0.00188102	5300	1
	GO:0060419	heart growth	2018-01-02	100/17381	0.011474	0.033729	0.00188102	5300	1
	GO:0046620	regulation of organ growth	2018-01-02	102/17381	0.0117029	0.033729	0.00188102	5300	1
	GO:0017015	regulation of transforming growth factor beta receptor signaling pathway	2018-01-02	103/17381	0.0118172	0.033729	0.00188102	5300	1
	GO:0051443	positive regulation of ubiquitin-protein transferase activity	2018-01-02	104/17381	0.0119316	0.033729	0.00188102	5300	1
	GO:1903844	regulation of cellular response to transforming growth factor beta stimulus	2018-01-02	105/17381	0.012046	0.033729	0.00188102	5300	1
	GO:0043500	muscle adaptation	2018-01-02	106/17381	0.0121604	0.033729	0.00188102	5300	1
	GO:0042177	negative regulation of protein catabolic process	2018-01-02	109/17381	0.0125035	0.033729	0.00188102	5300	1
	GO:0090101	negative regulation of transmembrane receptor protein serine/threonine kinase signaling pathway	2018-01-02	110/17381	0.0126178	0.033729	0.00188102	5300	1
	GO:0051149	positive regulation of muscle cell differentiation	2018-01-02	111/17381	0.0127321	0.033729	0.00188102	5300	1
	GO:0051153	regulation of striated muscle cell differentiation	2018-01-02	111/17381	0.0127321	0.033729	0.00188102	5300	1
	GO:0055007	cardiac muscle cell differentiation	2018-01-02	116/17381	0.0133037	0.0339125	0.00189125	5300	1
	GO:0051438	regulation of ubiquitin-protein transferase activity	2018-01-02	124/17381	0.014218	0.0339125	0.00189125	5300	1
	GO:0032479	regulation of type I interferon production	2018-01-02	125/17381	0.0143322	0.0339125	0.00189125	5300	1
	GO:0032606	type I interferon production	2018-01-02	126/17381	0.0144465	0.0339125	0.00189125	5300	1
	GO:0090263	positive regulation of canonical Wnt signaling pathway	2018-01-02	126/17381	0.0144465	0.0339125	0.00189125	5300	1
	GO:0002433	immune response-regulating cell surface receptor signaling pathway involved in phagocytosis	2018-01-02	132/17381	0.0151318	0.0339125	0.00189125	63916	1
	GO:0038096	Fc-gamma receptor signaling pathway involved in phagocytosis	2018-01-02	132/17381	0.0151318	0.0339125	0.00189125	63916	1
	GO:0038094	Fc-gamma receptor signaling pathway	2018-01-02	136/17381	0.0155885	0.0339125	0.00189125	63916	1
	GO:0000910	cytokinesis	2018-01-02	137/17381	0.0157027	0.0339125	0.00189125	5300	1
	GO:0002431	Fc receptor mediated stimulatory signaling pathway	2018-01-02	137/17381	0.0157027	0.0339125	0.00189125	63916	1
	GO:0043524	negative regulation of neuron apoptotic process	2018-01-02	137/17381	0.0157027	0.0339125	0.00189125	5300	1
	GO:0090288	negative regulation of cellular response to growth factor stimulus	2018-01-02	139/17381	0.015931	0.0339125	0.00189125	5300	1
	GO:0051302	regulation of cell division	2018-01-02	141/17381	0.0161593	0.0339125	0.00189125	5300	1
	GO:0016202	regulation of striated muscle tissue development	2018-01-02	142/17381	0.0162734	0.0339125	0.00189125	5300	1
	GO:0035303	regulation of dephosphorylation	2018-01-02	143/17381	0.0163875	0.0339125	0.00189125	5300	1
	GO:1901861	regulation of muscle tissue development	2018-01-02	144/17381	0.0165017	0.0339125	0.00189125	5300	1
	GO:0035051	cardiocyte differentiation	2018-01-02	146/17381	0.0167299	0.0339125	0.00189125	5300	1
	GO:0048634	regulation of muscle organ development	2018-01-02	147/17381	0.016844	0.0339125	0.00189125	5300	1
	GO:0051100	negative regulation of binding	2018-01-02	150/17381	0.0171862	0.0341463	0.00190429	5300	1
	GO:0050821	protein stabilization	2018-01-02	154/17381	0.0176425	0.0341541	0.00190472	5300	1
	GO:0055002	striated muscle cell development	2018-01-02	154/17381	0.0176425	0.0341541	0.00190472	5300	1
	GO:0007088	regulation of mitotic nuclear division	2018-01-02	157/17381	0.0179846	0.0343757	0.00191708	5300	1
	GO:0030177	positive regulation of Wnt signaling pathway	2018-01-02	160/17381	0.0183267	0.0343771	0.00191716	5300	1
	GO:0030307	positive regulation of cell growth	2018-01-02	161/17381	0.0184407	0.0343771	0.00191716	5300	1
	GO:0043409	negative regulation of MAPK cascade	2018-01-02	165/17381	0.0188967	0.0347885	0.0019401	5300	1
	GO:0035265	organ growth	2018-01-02	168/17381	0.0192386	0.0347885	0.0019401	5300	1
	GO:0055001	muscle cell development	2018-01-02	169/17381	0.0193525	0.0347885	0.0019401	5300	1
	GO:0007179	transforming growth factor beta receptor signaling pathway	2018-01-02	174/17381	0.0199222	0.0349731	0.0019504	5300	1
	GO:0048639	positive regulation of developmental growth	2018-01-02	174/17381	0.0199222	0.0349731	0.0019504	5300	1
	GO:1901796	regulation of signal transduction by p53 class mediator	2018-01-02	176/17381	0.02015	0.0349731	0.0019504	5300	1
	GO:0051783	regulation of nuclear division	2018-01-02	181/17381	0.0207195	0.0355397	0.001982	5300	1
	GO:0031398	positive regulation of protein ubiquitination	2018-01-02	183/17381	0.0209472	0.0355397	0.001982	5300	1
	GO:1901215	negative regulation of neuron death	2018-01-02	186/17381	0.0212888	0.0357178	0.00199193	5300	1
	GO:0043523	regulation of neuron apoptotic process	2018-01-02	195/17381	0.0223131	0.0367317	0.00204848	5300	1
	GO:0051147	regulation of muscle cell differentiation	2018-01-02	197/17381	0.0225406	0.0367317	0.00204848	5300	1
	GO:1903322	positive regulation of protein modification by small protein conjugation or removal	2018-01-02	200/17381	0.0228819	0.0367317	0.00204848	5300	1
	GO:0043393	regulation of protein binding	2018-01-02	202/17381	0.0231094	0.0367317	0.00204848	5300	1
	GO:0048588	developmental cell growth	2018-01-02	202/17381	0.0231094	0.0367317	0.00204848	5300	1
	GO:0048738	cardiac muscle tissue development	2018-01-02	215/17381	0.0245873	0.0383279	0.00213749	5300	1
	GO:0090092	regulation of transmembrane receptor protein serine/threonine kinase signaling pathway	2018-01-02	216/17381	0.024701	0.0383279	0.00213749	5300	1
	GO:0051402	neuron apoptotic process	2018-01-02	221/17381	0.0252691	0.0383279	0.00213749	5300	1
	GO:0071560	cellular response to transforming growth factor beta stimulus	2018-01-02	221/17381	0.0252691	0.0383279	0.00213749	5300	1
	GO:1900180	regulation of protein localization to nucleus	2018-01-02	222/17381	0.0253827	0.0383279	0.00213749	5300	1
	GO:0071559	response to transforming growth factor beta	2018-01-02	225/17381	0.0257235	0.0384579	0.00214474	5300	1
	GO:0090257	regulation of muscle system process	2018-01-02	237/17381	0.027086	0.0400292	0.00223237	5300	1
	GO:0001818	negative regulation of cytokine production	2018-01-02	245/17381	0.0279938	0.0400292	0.00223237	5300	1
	GO:0038093	Fc receptor signaling pathway	2018-01-02	246/17381	0.0281073	0.0400292	0.00223237	63916	1
	GO:0031647	regulation of protein stability	2018-01-02	248/17381	0.0283341	0.0400292	0.00223237	5300	1
	GO:0060828	regulation of canonical Wnt signaling pathway	2018-01-02	248/17381	0.0283341	0.0400292	0.00223237	5300	1
	GO:0090287	regulation of cellular response to growth factor stimulus	2018-01-02	253/17381	0.0289012	0.0400292	0.00223237	5300	1
	GO:0140014	mitotic nuclear division	2018-01-02	253/17381	0.0289012	0.0400292	0.00223237	5300	1
	GO:0006470	protein dephosphorylation	2018-01-02	254/17381	0.0290146	0.0400292	0.00223237	5300	1
	GO:0045927	positive regulation of growth	2018-01-02	257/17381	0.0293547	0.0400292	0.00223237	5300	1
	GO:0009895	negative regulation of catabolic process	2018-01-02	260/17381	0.0296948	0.0400292	0.00223237	5300	1
	GO:0050808	synapse organization	2018-01-02	260/17381	0.0296948	0.0400292	0.00223237	5300	1
	GO:0031396	regulation of protein ubiquitination	2018-01-02	265/17381	0.0302615	0.0400292	0.00223237	5300	1
	GO:0051146	striated muscle cell differentiation	2018-01-02	270/17381	0.030828	0.0400292	0.00223237	5300	1
	GO:0060326	cell chemotaxis	2018-01-02	270/17381	0.030828	0.0400292	0.00223237	63916	1
	GO:0072331	signal transduction by p53 class mediator	2018-01-02	270/17381	0.030828	0.0400292	0.00223237	5300	1
	GO:0070372	regulation of ERK1 and ERK2 cascade	2018-01-02	274/17381	0.0312811	0.0400292	0.00223237	5300	1
	GO:2000146	negative regulation of cell motility	2018-01-02	274/17381	0.0312811	0.0400292	0.00223237	5300	1
	GO:1901214	regulation of neuron death	2018-01-02	280/17381	0.0319605	0.0405549	0.00226169	5300	1
	GO:0051271	negative regulation of cellular component movement	2018-01-02	290/17381	0.0330923	0.0410986	0.00229201	5300	1
	GO:0070371	ERK1 and ERK2 cascade	2018-01-02	290/17381	0.0330923	0.0410986	0.00229201	5300	1
	GO:1903320	regulation of protein modification by small protein conjugation or removal	2018-01-02	291/17381	0.0332055	0.0410986	0.00229201	5300	1
	GO:0060070	canonical Wnt signaling pathway	2018-01-02	302/17381	0.0344497	0.0420885	0.00234721	5300	1
	GO:0040013	negative regulation of locomotion	2018-01-02	303/17381	0.0345627	0.0420885	0.00234721	5300	1
	GO:0048638	regulation of developmental growth	2018-01-02	310/17381	0.035354	0.0427077	0.00238175	5300	1
	GO:0006909	phagocytosis	2018-01-02	315/17381	0.035919	0.0428412	0.00238919	63916	1
	GO:0070997	neuron death	2018-01-02	316/17381	0.036032	0.0428412	0.00238919	5300	1
	GO:0007178	transmembrane receptor protein serine/threonine kinase signaling pathway	2018-01-02	322/17381	0.0367098	0.0433061	0.00241512	5300	1
	GO:0030111	regulation of Wnt signaling pathway	2018-01-02	325/17381	0.0370486	0.0433669	0.00241851	5300	1
	GO:0051098	regulation of binding	2018-01-02	339/17381	0.0386288	0.0448688	0.00250227	5300	1
	GO:0014706	striated muscle tissue development	2018-01-02	369/17381	0.0420106	0.0484245	0.00270056	5300	1
	GO:0034504	protein localization to nucleus	2018-01-02	372/17381	0.0423485	0.0484441	0.00270166	5300	1
	GO:0060537	muscle tissue development	2018-01-02	387/17381	0.0440369	0.0496433	0.00276853	5300	1
	GO:0007517	muscle organ development	2018-01-02	389/17381	0.0442619	0.0496433	0.00276853	5300	1
	GO:0001558	regulation of cell growth	2018-01-02	391/17381	0.0444869	0.0496433	0.00276853	5300	1
	GO:0000280	nuclear division	2018-01-02	393/17381	0.0447118	0.0496433	0.00276853	5300	1
Module 11	GO:0071560	cellular response to transforming growth factor beta stimulus	2018-07-26	221/17381	2.61727e-08	2.21342e-05	1.3434e-05	6662/5747/1278/6714/4086/1284/6868	7
	GO:0071559	response to transforming growth factor beta	2018-07-26	225/17381	2.96109e-08	2.21342e-05	1.3434e-05	6662/5747/1278/6714/4086/1284/6868	7
	GO:0030335	positive regulation of cell migration	2018-08-26	442/17381	1.71547e-07	8.54877e-05	5.18855e-05	5962/2321/6662/5747/1432/3655/6714/6868	8
	GO:2000147	positive regulation of cell motility	2018-08-26	460/17381	2.32716e-07	8.60517e-05	5.22278e-05	5962/2321/6662/5747/1432/3655/6714/6868	8
	GO:0051272	positive regulation of cellular component movement	2018-08-26	473/17381	2.87798e-07	8.60517e-05	5.22278e-05	5962/2321/6662/5747/1432/3655/6714/6868	8
	GO:0040017	positive regulation of locomotion	2018-08-26	490/17381	3.76475e-07	9.38051e-05	5.69336e-05	5962/2321/6662/5747/1432/3655/6714/6868	8
	GO:0007179	transforming growth factor beta receptor signaling pathway	2018-05-26	174/17381	5.26572e-06	0.00112461	0.000682563	5747/1278/6714/4086/6868	5
	GO:0007178	transmembrane receptor protein serine/threonine kinase signaling pathway	2018-06-26	322/17381	6.498e-06	0.00121431	0.00073701	5747/1432/1278/6714/4086/6868	6
	GO:0010810	regulation of cell-substrate adhesion	2018-05-26	189/17381	7.87857e-06	0.00121683	0.000738538	5921/5747/3655/6714/1399	5
	GO:0007265	Ras protein signal transduction	2018-06-26	338/17381	8.57412e-06	0.00121683	0.000738538	5921/4853/5962/1432/1278/1399	6
	GO:0048010	vascular endothelial growth factor receptor signaling pathway	2018-04-26	92/17381	1.00512e-05	0.00121683	0.000738538	2321/5747/1432/6714	4
	GO:0043552	positive regulation of phosphatidylinositol 3-kinase activity	2018-03-26	29/17381	1.05811e-05	0.00121683	0.000738538	2321/5747/6714	3
	GO:1902893	regulation of pri-miRNA transcription from RNA polymerase II promoter	2018-03-26	29/17381	1.05811e-05	0.00121683	0.000738538	6662/7528/4086	3
	GO:0090218	positive regulation of lipid kinase activity	2018-03-26	32/17381	1.43203e-05	0.00152921	0.000928129	2321/5747/6714	3
	GO:0061614	pri-miRNA transcription from RNA polymerase II promoter	2018-03-26	33/17381	1.57367e-05	0.00156843	0.000951933	6662/7528/4086	3
	GO:0007162	negative regulation of cell adhesion	2018-05-26	248/17381	2.92425e-05	0.00272566	0.0016543	5921/5962/57162/5747/6714	5
	GO:0043551	regulation of phosphatidylinositol 3-kinase activity	2018-03-26	42/17381	3.28173e-05	0.00272566	0.0016543	2321/5747/6714	3
	GO:1903727	positive regulation of phospholipid metabolic process	2018-03-26	42/17381	3.28173e-05	0.00272566	0.0016543	2321/5747/6714	3
	GO:0007173	epidermal growth factor receptor signaling pathway	2018-04-26	130/17381	3.9316e-05	0.00309355	0.00187759	6662/5747/6714/6868	4
	GO:0050900	leukocyte migration	2018-06-26	471/17381	5.56719e-05	0.00416147	0.00252574	2321/1432/1278/3655/6714/6868	6
	GO:0043550	regulation of lipid kinase activity	2018-03-26	51/17381	5.90021e-05	0.00420039	0.00254936	2321/5747/6714	3
	GO:0071214	cellular response to abiotic stimulus	2018-05-26	296/17381	6.7916e-05	0.00441454	0.00267934	6662/1432/94241/7528/2332	5
	GO:0104004	cellular response to environmental stimulus	2018-05-26	296/17381	6.7916e-05	0.00441454	0.00267934	6662/1432/94241/7528/2332	5
	GO:0038127	ERBB signaling pathway	2018-04-26	152/17381	7.23491e-05	0.00442732	0.0026871	6662/5747/6714/6868	4
	GO:0033627	cell adhesion mediated by integrin	2018-03-26	55/17381	7.40355e-05	0.00442732	0.0026871	5747/3655/6868	3
	GO:0060491	regulation of cell projection assembly	2018-04-26	156/17381	8.0028e-05	0.00456299	0.00276944	5962/688/6714/2332	4
	GO:1903391	regulation of adherens junction organization	2018-03-26	57/17381	8.24084e-05	0.00456299	0.00276944	5962/5747/6714	3
	GO:0031589	cell-substrate adhesion	2018-05-26	316/17381	9.24877e-05	0.00493818	0.00299716	5921/5747/3655/6714/1399	5
	GO:0001101	response to acid chemical	2018-05-26	324/17381	0.000104039	0.00514264	0.00312125	6662/1278/7528/6714/80315	5
	GO:0071478	cellular response to radiation	2018-04-26	167/17381	0.000104203	0.00514264	0.00312125	1432/94241/7528/2332	4
	GO:0035265	organ growth	2018-04-26	168/17381	0.000106637	0.00514264	0.00312125	6662/5747/1432/4086	4
	GO:1902894	negative regulation of pri-miRNA transcription from RNA polymerase II promoter	2018-02-26	11/17381	0.000117369	0.00516114	0.00313248	6662/7528	2
	GO:1905941	positive regulation of gonad development	2018-02-26	11/17381	0.000117369	0.00516114	0.00313248	6662/6714	2
	GO:0030198	extracellular matrix organization	2018-05-26	335/17381	0.000121701	0.00516114	0.00313248	6662/5747/1278/3655/1284	5
	GO:0043062	extracellular structure organization	2018-05-26	336/17381	0.000123414	0.00516114	0.00313248	6662/5747/1278/3655/1284	5
	GO:0014068	positive regulation of phosphatidylinositol 3-kinase signaling	2018-03-26	66/17381	0.000127734	0.00516114	0.00313248	2321/6662/5747	3
	GO:1903725	regulation of phospholipid metabolic process	2018-03-26	66/17381	0.000127734	0.00516114	0.00313248	2321/5747/6714	3
	GO:0071902	positive regulation of protein serine/threonine kinase activity	2018-05-26	350/17381	0.000149405	0.00580547	0.00352354	2321/1432/6714/1399/6868	5
	GO:0030278	regulation of ossification	2018-04-26	184/17381	0.000151447	0.00580547	0.00352354	6662/5747/1432/4086	4
	GO:0034644	cellular response to UV	2018-03-26	74/17381	0.000179519	0.00670952	0.00407225	94241/7528/2332	3
	GO:0071229	cellular response to acid chemical	2018-04-26	197/17381	0.000196822	0.00717682	0.00435586	6662/1278/6714/80315	4
	GO:0007160	cell-matrix adhesion	2018-04-26	206/17381	0.000233507	0.00831172	0.00504468	5921/5747/3655/6714	4
	GO:0030033	microvillus assembly	2018-02-26	16/17381	0.000254902	0.0084684	0.00513977	5962/688	2
	GO:1903392	negative regulation of adherens junction organization	2018-02-26	16/17381	0.000254902	0.0084684	0.00513977	5962/6714	2
	GO:2000811	negative regulation of anoikis	2018-02-26	16/17381	0.000254902	0.0084684	0.00513977	5747/6714	2
	GO:0034446	substrate adhesion-dependent cell spreading	2018-03-26	84/17381	0.000261269	0.00849125	0.00515364	5747/6714/1399	3
	GO:0042176	regulation of protein catabolic process	2018-05-26	399/17381	0.000274683	0.00873727	0.00530296	5962/6662/5747/7078/2332	5
	GO:2000641	regulation of early endosome to late endosome transport	2018-02-26	17/17381	0.000288623	0.00884112	0.00536599	5962/6714	2
	GO:0048013	ephrin receptor signaling pathway	2018-03-26	87/17381	0.000289776	0.00884112	0.00536599	5921/5747/6714	3
	GO:0007044	cell-substrate junction assembly	2018-03-26	89/17381	0.000309853	0.00926462	0.00562302	5747/3655/6714	3
	GO:0048732	gland development	2018-05-26	422/17381	0.00035562	0.00985503	0.00598137	10765/6426/6662/6714/1399	5
	GO:1905939	regulation of gonad development	2018-02-26	19/17381	0.000362233	0.00985503	0.00598137	6662/6714	2
	GO:0022407	regulation of cell-cell adhesion	2018-05-26	425/17381	0.000367383	0.00985503	0.00598137	5962/57162/5747/3655/6714	5
	GO:0048608	reproductive structure development	2018-05-26	429/17381	0.000383524	0.00985503	0.00598137	10765/6662/5747/1432/6714	5
	GO:0007229	integrin-mediated signaling pathway	2018-03-26	96/17381	0.000387145	0.00985503	0.00598137	5747/3655/6714	3
	GO:0022604	regulation of cell morphogenesis	2018-05-26	432/17381	0.000395979	0.00985503	0.00598137	5921/5962/5747/6714/1399	5
	GO:0061458	reproductive system development	2018-05-26	432/17381	0.000395979	0.00985503	0.00598137	10765/6662/5747/1432/6714	5
	GO:0014066	regulation of phosphatidylinositol 3-kinase signaling	2018-03-26	97/17381	0.000399105	0.00985503	0.00598137	2321/6662/5747	3
	GO:0001502	cartilage condensation	2018-02-26	20/17381	0.000402112	0.00985503	0.00598137	6662/1432	2
	GO:0036120	cellular response to platelet-derived growth factor stimulus	2018-02-26	20/17381	0.000402112	0.00985503	0.00598137	5962/6714	2
	GO:0060065	uterus development	2018-02-26	20/17381	0.000402112	0.00985503	0.00598137	10765/6714	2
	GO:0036119	response to platelet-derived growth factor	2018-02-26	21/17381	0.00044403	0.0103723	0.0062953	5962/6714	2
	GO:0098743	cell aggregation	2018-02-26	21/17381	0.00044403	0.0103723	0.0062953	6662/1432	2
	GO:1903649	regulation of cytoplasmic transport	2018-02-26	21/17381	0.00044403	0.0103723	0.0062953	5962/6714	2
	GO:0043491	protein kinase B signaling	2018-04-26	245/17381	0.000451181	0.0103772	0.00629827	23239/6662/5747/6714	4
	GO:0009896	positive regulation of catabolic process	2018-05-26	447/17381	0.000462928	0.010486	0.00636434	5962/6662/5747/94241/2332	5
	GO:0001952	regulation of cell-matrix adhesion	2018-03-26	103/17381	0.000475879	0.0106185	0.00644474	5921/5747/6714	3
	GO:2000765	regulation of cytoplasmic translation	2018-02-26	22/17381	0.000487984	0.0107285	0.00651149	2332/80315	2
	GO:0060444	branching involved in mammary gland duct morphogenesis	2018-02-26	23/17381	0.000533968	0.011404	0.00692151	10765/6714	2
	GO:2000209	regulation of anoikis	2018-02-26	23/17381	0.000533968	0.011404	0.00692151	5747/6714	2
	GO:0071482	cellular response to light stimulus	2018-03-26	109/17381	0.000561552	0.0117461	0.00712914	94241/7528/2332	3
	GO:0001525	angiogenesis	2018-05-26	469/17381	0.000576223	0.0117461	0.00712914	2321/5747/1432/688/1284	5
	GO:0032528	microvillus organization	2018-02-26	24/17381	0.000581975	0.0117461	0.00712914	5962/688	2
	GO:1905048	regulation of metallopeptidase activity	2018-02-26	24/17381	0.000581975	0.0117461	0.00712914	7078/1432	2
	GO:0043406	positive regulation of MAP kinase activity	2018-04-26	263/17381	0.000589271	0.0117461	0.00712914	2321/1432/6714/1399	4
	GO:0034330	cell junction organization	2018-04-26	265/17381	0.000606275	0.0119261	0.00723836	5962/5747/3655/6714	4
	GO:0045732	positive regulation of protein catabolic process	2018-04-26	268/17381	0.000632434	0.0122791	0.0074526	5962/6662/5747/2332	4
	GO:0070555	response to interleukin-1	2018-03-26	117/17381	0.000690328	0.0132313	0.00803053	6662/7528/6714	3
	GO:0001501	skeletal system development	2018-05-26	491/17381	0.000709317	0.0134231	0.00814698	6662/1432/1278/6714/4086	5
	GO:0022612	gland morphogenesis	2018-03-26	119/17381	0.000725217	0.0135525	0.00822549	10765/6662/6714	3
	GO:0071900	regulation of protein serine/threonine kinase activity	2018-05-26	495/17381	0.000735808	0.0135807	0.00824258	2321/1432/6714/1399/6868	5
	GO:0034332	adherens junction organization	2018-03-26	123/17381	0.00079833	0.0143796	0.00872747	5962/5747/6714	3
	GO:0045834	positive regulation of lipid metabolic process	2018-03-26	123/17381	0.00079833	0.0143796	0.00872747	2321/5747/6714	3
	GO:0070371	ERK1 and ERK2 cascade	2018-04-26	290/17381	0.000849415	0.0148829	0.00903294	4853/6662/7078/6714	4
	GO:0061036	positive regulation of cartilage development	2018-02-26	29/17381	0.000852167	0.0148829	0.00903294	6662/4086	2
	GO:0014065	phosphatidylinositol 3-kinase signaling	2018-03-26	126/17381	0.000856138	0.0148829	0.00903294	2321/6662/5747	3
	GO:0030879	mammary gland development	2018-03-26	131/17381	0.000958287	0.0164671	0.00999447	10765/6662/6714	3
	GO:0060603	mammary gland duct morphogenesis	2018-02-26	31/17381	0.000974211	0.0165505	0.0100451	10765/6714	2
	GO:0009411	response to UV	2018-03-26	133/17381	0.00100122	0.0168182	0.0102075	94241/7528/2332	3
	GO:0051056	regulation of small GTPase mediated signal transduction	2018-04-26	309/17381	0.00107535	0.0178627	0.0108415	5921/4853/5962/6714	4
	GO:0043276	anoikis	2018-02-26	33/17381	0.00110417	0.0181399	0.0110098	5747/6714	2
	GO:0032496	response to lipopolysaccharide	2018-04-26	316/17381	0.00116834	0.0186414	0.0113141	57162/1432/6714/6868	4
	GO:0001953	negative regulation of cell-matrix adhesion	2018-02-26	34/17381	0.0011721	0.0186414	0.0113141	5921/6714	2
	GO:0045737	positive regulation of cyclin-dependent protein serine/threonine kinase activity	2018-02-26	34/17381	0.0011721	0.0186414	0.0113141	6714/6868	2
	GO:0008360	regulation of cell shape	2018-03-26	142/17381	0.00120947	0.0190333	0.011552	5921/5962/5747	3
	GO:0003179	heart valve morphogenesis	2018-02-26	36/17381	0.00131385	0.0204604	0.0124182	4853/6662	2
	GO:0048754	branching morphogenesis of an epithelial tube	2018-03-26	148/17381	0.00136243	0.0209982	0.0127446	10765/6662/6714	3
	GO:1904031	positive regulation of cyclin-dependent protein kinase activity	2018-02-26	37/17381	0.00138765	0.0211687	0.0128481	6714/6868	2
	GO:0002237	response to molecule of bacterial origin	2018-04-26	333/17381	0.00141753	0.0214061	0.0129921	57162/1432/6714/6868	4
	GO:0045022	early endosome to late endosome transport	2018-02-26	38/17381	0.0014634	0.0218778	0.0132784	5962/6714	2
	GO:0043405	regulation of MAP kinase activity	2018-04-26	337/17381	0.00148117	0.0219243	0.0133066	2321/1432/6714/1399	4
	GO:0048015	phosphatidylinositol-mediated signaling	2018-03-26	153/17381	0.0014988	0.0219407	0.0133166	2321/6662/5747	3
	GO:0120032	regulation of plasma membrane bounded cell projection assembly	2018-03-26	154/17381	0.00152706	0.0219407	0.0133166	5962/688/2332	3
	GO:2001236	regulation of extrinsic apoptotic signaling pathway	2018-03-26	154/17381	0.00152706	0.0219407	0.0133166	7078/3655/6714	3
	GO:0050873	brown fat cell differentiation	2018-02-26	39/17381	0.00154108	0.0219407	0.0133166	1432/3655	2
	GO:0019827	stem cell population maintenance	2018-03-26	155/17381	0.00155566	0.0219407	0.0133166	4853/8202/6662	3
	GO:0048017	inositol lipid-mediated signaling	2018-03-26	156/17381	0.0015846	0.0220268	0.0133689	2321/6662/5747	3
	GO:0022408	negative regulation of cell-cell adhesion	2018-03-26	157/17381	0.00161387	0.0220268	0.0133689	5962/57162/5747	3
	GO:0098727	maintenance of cell number	2018-03-26	157/17381	0.00161387	0.0220268	0.0133689	4853/8202/6662	3
	GO:0003170	heart valve development	2018-02-26	40/17381	0.0016207	0.0220268	0.0133689	4853/6662	2
	GO:0006509	membrane protein ectodomain proteolysis	2018-02-26	41/17381	0.00170225	0.0225209	0.0136687	7078/6868	2
	GO:0038066	p38MAPK cascade	2018-02-26	41/17381	0.00170225	0.0225209	0.0136687	23239/1432	2
	GO:0098927	vesicle-mediated transport between endosomal compartments	2018-02-26	41/17381	0.00170225	0.0225209	0.0136687	5962/6714	2
	GO:0035924	cellular response to vascular endothelial growth factor stimulus	2018-02-26	44/17381	0.00195841	0.0256827	0.0155877	2321/1432	2
	GO:0007219	Notch signaling pathway	2018-03-26	169/17381	0.0019919	0.0258947	0.0157164	4853/6662/6868	3
	GO:0060443	mammary gland morphogenesis	2018-02-26	45/17381	0.00204762	0.026164	0.0158799	10765/6714	2
	GO:1902373	negative regulation of mRNA catabolic process	2018-02-26	45/17381	0.00204762	0.026164	0.0158799	1432/2332	2
	GO:0001503	ossification	2018-04-26	373/17381	0.0021469	0.0272002	0.0165087	6662/5747/1432/4086	4
	GO:0018108	peptidyl-tyrosine phosphorylation	2018-04-26	375/17381	0.00218906	0.0275013	0.0166915	2321/5747/6714/6868	4
	GO:0018212	peptidyl-tyrosine modification	2018-04-26	378/17381	0.00225338	0.0280734	0.0170387	2321/5747/6714/6868	4
	GO:0098586	cellular response to virus	2018-02-26	48/17381	0.00232663	0.0285107	0.0173042	1432/2332	2
	GO:2000273	positive regulation of receptor activity	2018-02-26	48/17381	0.00232663	0.0285107	0.0173042	8202/6868	2
	GO:2001233	regulation of apoptotic signaling pathway	2018-04-26	383/17381	0.00236347	0.0287267	0.0174353	7078/94241/3655/6714	4
	GO:0061138	morphogenesis of a branching epithelium	2018-03-26	180/17381	0.00238327	0.0287338	0.0174396	10765/6662/6714	3
	GO:1900024	regulation of substrate adhesion-dependent cell spreading	2018-02-26	49/17381	0.00242341	0.0289487	0.01757	5747/1399	2
	GO:0060537	muscle tissue development	2018-04-26	387/17381	0.00245419	0.0289487	0.01757	6662/1432/688/4086	4
	GO:0051216	cartilage development	2018-03-26	182/17381	0.00245919	0.0289487	0.01757	6662/1432/4086	3
	GO:0045661	regulation of myoblast differentiation	2018-02-26	50/17381	0.00252207	0.029457	0.0178785	6662/1432	2
	GO:0060348	bone development	2018-03-26	185/17381	0.00257585	0.0298395	0.0181107	6662/6714/4086	3
	GO:0045862	positive regulation of proteolysis	2018-04-26	393/17381	0.00259474	0.0298395	0.0181107	5747/1432/6714/2332	4
	GO:1902369	negative regulation of RNA catabolic process	2018-02-26	51/17381	0.0026226	0.0299297	0.0181654	1432/2332	2
	GO:0031331	positive regulation of cellular catabolic process	2018-04-26	396/17381	0.00266706	0.0302065	0.0183334	5962/5747/94241/2332	4
	GO:0038083	peptidyl-tyrosine autophosphorylation	2018-02-26	52/17381	0.002725	0.0306307	0.0185908	5747/6714	2
	GO:0000380	alternative mRNA splicing, via spliceosome	2018-02-26	53/17381	0.00282927	0.0315654	0.0191581	6426/2332	2
	GO:0001763	morphogenesis of a branching structure	2018-03-26	193/17381	0.0029036	0.0320322	0.0194415	10765/6662/6714	3
	GO:0051893	regulation of focal adhesion assembly	2018-02-26	54/17381	0.00293539	0.0320322	0.0194415	5747/6714	2
	GO:0090109	regulation of cell-substrate junction assembly	2018-02-26	54/17381	0.00293539	0.0320322	0.0194415	5747/6714	2
	GO:0001819	positive regulation of cytokine production	2018-04-26	409/17381	0.0029966	0.0323352	0.0196254	57162/1432/6714/6868	4
	GO:0002064	epithelial cell development	2018-03-26	196/17381	0.00303283	0.0323352	0.0196254	5962/6662/688	3
	GO:2000243	positive regulation of reproductive process	2018-02-26	55/17381	0.00304337	0.0323352	0.0196254	6662/6714	2
	GO:0043588	skin development	2018-04-26	411/17381	0.00304967	0.0323352	0.0196254	8202/6662/1278/3655	4
	GO:0051057	positive regulation of small GTPase mediated signal transduction	2018-02-26	56/17381	0.00315319	0.0331973	0.0201486	4853/6714	2
	GO:0010812	negative regulation of cell-substrate adhesion	2018-02-26	57/17381	0.00326486	0.0336618	0.0204305	5921/6714	2
	GO:0033619	membrane protein proteolysis	2018-02-26	57/17381	0.00326486	0.0336618	0.0204305	7078/6868	2
	GO:0046847	filopodium assembly	2018-02-26	57/17381	0.00326486	0.0336618	0.0204305	3655/2332	2
	GO:1903364	positive regulation of cellular protein catabolic process	2018-03-26	202/17381	0.00330185	0.03381	0.0205205	5962/5747/2332	3
	GO:0010632	regulation of epithelial cell migration	2018-03-26	203/17381	0.00334806	0.03382	0.0205265	6662/5747/6714	3
	GO:0030595	leukocyte chemotaxis	2018-03-26	203/17381	0.00334806	0.03382	0.0205265	2321/1432/6868	3
	GO:0045600	positive regulation of fat cell differentiation	2018-02-26	58/17381	0.00337836	0.0338336	0.0205348	1432/688	2
	GO:0034329	cell junction assembly	2018-03-26	204/17381	0.00339468	0.0338336	0.0205348	5747/3655/6714	3
	GO:0031330	negative regulation of cellular catabolic process	2018-03-26	209/17381	0.00363375	0.0357398	0.0216917	7078/1432/2332	3
	GO:0046578	regulation of Ras protein signal transduction	2018-03-26	209/17381	0.00363375	0.0357398	0.0216917	5921/4853/5962	3
	GO:0009612	response to mechanical stimulus	2018-03-26	210/17381	0.00368277	0.0357515	0.0216989	6662/1432/6714	3
	GO:0045444	fat cell differentiation	2018-03-26	210/17381	0.00368277	0.0357515	0.0216989	1432/688/3655	3
	GO:0051896	regulation of protein kinase B signaling	2018-03-26	211/17381	0.00373219	0.0359976	0.0218482	23239/5747/6714	3
	GO:0009314	response to radiation	2018-04-26	437/17381	0.0037996	0.0364128	0.0221002	1432/94241/7528/2332	4
	GO:0030858	positive regulation of epithelial cell differentiation	2018-02-26	62/17381	0.00385062	0.0364347	0.0221135	8202/6662	2
	GO:0071230	cellular response to amino acid stimulus	2018-02-26	62/17381	0.00385062	0.0364347	0.0221135	1278/80315	2
	GO:0002181	cytoplasmic translation	2018-02-26	63/17381	0.00397323	0.0371248	0.0225324	2332/80315	2
	GO:0060038	cardiac muscle cell proliferation	2018-02-26	63/17381	0.00397323	0.0371248	0.0225324	1432/4086	2
	GO:0097191	extrinsic apoptotic signaling pathway	2018-03-26	218/17381	0.00408961	0.0378146	0.022951	7078/3655/6714	3
	GO:0061035	regulation of cartilage development	2018-02-26	64/17381	0.00409764	0.0378146	0.022951	6662/4086	2
	GO:0061180	mammary gland epithelium development	2018-02-26	66/17381	0.00435185	0.0399142	0.0242253	10765/6714	2
	GO:0030574	collagen catabolic process	2018-02-26	68/17381	0.00461322	0.0420534	0.0255237	1278/1284	2
	GO:0006403	RNA localization	2018-03-26	231/17381	0.00480738	0.0435578	0.0264367	6426/7528/2332	3
	GO:0045216	cell-cell junction organization	2018-03-26	233/17381	0.00492415	0.0440814	0.0267546	5962/5747/6714	3
	GO:0048872	homeostasis of number of cells	2018-03-26	233/17381	0.00492415	0.0440814	0.0267546	6662/1432/6868	3
	GO:0046777	protein autophosphorylation	2018-03-26	234/17381	0.00498317	0.0443443	0.0269141	2321/5747/6714	3
	GO:0003007	heart morphogenesis	2018-03-26	235/17381	0.00504262	0.0446078	0.0270741	4853/6662/5747	3
	GO:0043087	regulation of GTPase activity	2018-04-26	475/17381	0.00510889	0.0449281	0.0272685	5921/5962/5747/3655	4
	GO:0061448	connective tissue development	2018-03-26	237/17381	0.00516282	0.0450692	0.0273541	6662/1432/4086	3
	GO:1901652	response to peptide	2018-04-26	477/17381	0.00518522	0.0450692	0.0273541	5747/1432/688/6714	4
	GO:0002521	leukocyte differentiation	2018-04-26	479/17381	0.00526233	0.0452573	0.0274683	4853/1432/6714/6868	4
	GO:0007045	cell-substrate adherens junction assembly	2018-02-26	73/17381	0.00529768	0.0452573	0.0274683	5747/6714	2
	GO:0048041	focal adhesion assembly	2018-02-26	73/17381	0.00529768	0.0452573	0.0274683	5747/6714	2
	GO:0014855	striated muscle cell proliferation	2018-02-26	74/17381	0.00543985	0.0462078	0.0280452	1432/4086	2
	GO:0001570	vasculogenesis	2018-02-26	75/17381	0.00558377	0.0471623	0.0286245	5921/5747	2
	GO:0044243	multicellular organismal catabolic process	2018-02-26	76/17381	0.00572943	0.0478519	0.029043	1278/1284	2
	GO:1903312	negative regulation of mRNA metabolic process	2018-02-26	76/17381	0.00572943	0.0478519	0.029043	1432/2332	2
	GO:0060828	regulation of canonical Wnt signaling pathway	2018-03-26	248/17381	0.00585497	0.0486288	0.0295145	6662/1432/6714	3
	GO:0007215	glutamate receptor signaling pathway	2018-02-26	78/17381	0.00602596	0.0497724	0.0302086	2332/80315	2
Module 12	GO:0060965	negative regulation of gene silencing by miRNA	2018-01-02	11/17381	0.00126539	0.0275981	0.00290506	1994	1
	GO:0060149	negative regulation of posttranscriptional gene silencing	2018-01-02	13/17381	0.00149537	0.0275981	0.00290506	1994	1
	GO:0060967	negative regulation of gene silencing by RNA	2018-01-02	13/17381	0.00149537	0.0275981	0.00290506	1994	1
	GO:0070935	3'-UTR-mediated mRNA stabilization	2018-01-02	17/17381	0.00195526	0.0275981	0.00290506	1994	1
	GO:0097062	dendritic spine maintenance	2018-01-02	17/17381	0.00195526	0.0275981	0.00290506	3480	1
	GO:0097242	amyloid-beta clearance	2018-01-02	18/17381	0.00207021	0.0275981	0.00290506	3480	1
	GO:0060969	negative regulation of gene silencing	2018-01-02	22/17381	0.00252997	0.0275981	0.00290506	1994	1
	GO:1904646	cellular response to amyloid-beta	2018-01-02	24/17381	0.00275981	0.0275981	0.00290506	3480	1
	GO:2000036	regulation of stem cell population maintenance	2018-01-02	24/17381	0.00275981	0.0275981	0.00290506	1994	1
	GO:1904645	response to amyloid-beta	2018-01-02	27/17381	0.00310452	0.0279407	0.00294112	3480	1
	GO:0043243	positive regulation of protein complex disassembly	2018-01-02	34/17381	0.0039086	0.0288177	0.00303344	3480	1
[truncated: 2,687 more rows]
